# Supplementary material for: Neuron-specific RNA-sequencing reveals different responses in peripheral neurons after nerve injury
Source: bioRxiv preprint, doi:10.1101/2023.07.21.549881, version 4 (2024-04-30)
Supplement: Supplementary File 2 [file 549881_file09.xlsx]

## Sheet: Info
Each sheet represents the comparison of the two conditions indicated:
1) Motoneurons: crush IP vs control IP
2) Motoneurons: control IP vs control I
3) Proprioceptors: crush IP vs control IP
4) Proprioceptors: control IP vs control I
5) Cutaneous mechanoreceptors: crush IP vs control IP
6) Cutaneous mechanoreceptors: control IP vs control I
7) Nociceptors: crush IP vs control IP
8) Nociceptors: control IP vs control I

## Sheet: 1_Moto_CrushIP_ControlIP
baseMean	log2FoldChange	lfcSE	pvalue	padj	ENSEMBL	ENTREZID	SYMBOL	GENENAME
3756.82	3.76856	0.0956642	0	0	ENSMUSG00000015243	11303	Abca1	ATP-binding cassette, sub-family A (ABC1), member 1
2196.85	4.18108	0.0924952	0	0	ENSMUSG00000047261	14432	Gap43	growth associated protein 43
3409.28	1.12758	0.0335065	1.08405e-250	5.19081e-247	ENSMUSG00000045967	241263	Gpr158	G protein-coupled receptor 158
2743.06	4.26486	0.128159	2.55151e-243	9.1631e-240	ENSMUSG00000045136	73710	Tubb2b	tubulin, beta 2B class IIB
352.458	3.92245	0.118178	4.24298e-242	1.21901e-238	ENSMUSG00000052397	22350	Ezr	ezrin
917.531	6.0877	0.189874	1.54126e-226	3.69004e-223	ENSMUSG00000044734	66222	Serpinb1a	serine (or cysteine) peptidase inhibitor, clade B, member 1a
441.029	3.20779	0.101122	9.04093e-222	1.85533e-218	ENSMUSG00000022272	17909	Myo10	myosin X
653.513	2.98362	0.0941856	2.15068e-221	3.86182e-218	ENSMUSG00000024664	60527	Fads3	fatty acid desaturase 3
1184.47	3.27077	0.111745	3.30975e-189	5.28273e-186	ENSMUSG00000008393	52502	Carhsp1	calcium regulated heat stable protein 1
166.255	3.3783	0.121146	6.25986e-172	8.99229e-169	ENSMUSG00000044017	243277	Adgrd1	adhesion G protein-coupled receptor D1
607.407	1.6096	0.0591891	3.20506e-164	4.18551e-161	ENSMUSG00000030272	52163	Camk1	calcium/calmodulin-dependent protein kinase I
537.081	1.80159	0.0668816	2.3731e-161	2.84079e-158	ENSMUSG00000049303	171180	Syt12	synaptotagmin XII
1253.44	1.80909	0.0679742	1.3315e-157	1.47131e-154	ENSMUSG00000020737	15374	Jpt1	Jupiter microtubule associated homolog 1
10941.7	1.97007	0.0751846	4.71194e-153	4.83479e-150	ENSMUSG00000037742	13627	Eef1a1	eukaryotic translation elongation factor 1 alpha 1
365.334	4.53485	0.172924	4.19603e-152	4.0184e-149	ENSMUSG00000020122	13649	Egfr	epidermal growth factor receptor
1261.99	3.39357	0.132311	7.18134e-146	6.4475e-143	ENSMUSG00000075316	20274	Scn9a	sodium channel, voltage-gated, type IX, alpha
713.552	3.60326	0.141264	3.59865e-144	3.04086e-141	ENSMUSG00000001473	67951	Tubb6	tubulin, beta 6 class V
381.136	2.26347	0.0905916	1.29112e-139	1.03038e-136	ENSMUSG00000063632	20666	Sox11	SRY (sex determining region Y)-box 11
1531.74	3.93162	0.158244	8.40881e-137	6.3575e-134	ENSMUSG00000030077	12661	Chl1	cell adhesion molecule L1-like
499.998	2.82199	0.114243	4.55484e-136	3.27151e-133	ENSMUSG00000036390	13197	Gadd45a	growth arrest and DNA-damage-inducible 45 alpha
1098.59	1.15697	0.0475656	4.98905e-133	3.41275e-130	ENSMUSG00000028194	69219	Ddah1	dimethylarginine dimethylaminohydrolase 1
1077.22	2.04048	0.0845854	2.39798e-130	1.54976e-127	ENSMUSG00000021062	104886	Rab15	RAB15, member RAS oncogene family
1258	1.05726	0.0439611	2.48134e-130	1.54976e-127	ENSMUSG00000022661	17470	Cd200	CD200 antigen
747.419	1.8353	0.0788091	1.57494e-121	9.42668e-119	ENSMUSG00000050271	244418	Prag1	PEAK1 related kinase activating pseudokinase 1
1113.9	3.13455	0.135662	3.93227e-119	2.25948e-116	ENSMUSG00000004105	26360	Angptl2	angiopoietin-like 2
1245.03	1.12695	0.0506925	6.51707e-112	3.60068e-109	ENSMUSG00000024270	106957	Slc39a6	solute carrier family 39 (metal ion transporter), member 6
233.375	2.52293	0.113588	5.57625e-111	2.96677e-108	ENSMUSG00000058057	668178	Mettl7a3	methyltransferase like 7A3
1022.89	1.51786	0.0684944	3.246e-110	1.66531e-107	ENSMUSG00000028226	17389	Mmp16	matrix metallopeptidase 16
424.484	7.89994	0.361537	1.14396e-107	5.66657e-105	ENSMUSG00000024087	13078	Cyp1b1	cytochrome P450, family 1, subfamily b, polypeptide 1
212.564	2.6834	0.123245	1.27867e-106	6.12272e-104	ENSMUSG00000024376	13824	Epb41l4a	erythrocyte membrane protein band 4.1 like 4a
585.458	2.09475	0.0967846	1.09983e-105	5.09645e-103	ENSMUSG00000002980	57278	Bcam	basal cell adhesion molecule
4213.81	1.84117	0.0852078	3.97965e-105	1.78649e-102	ENSMUSG00000004558	29811	Ndrg2	N-myc downstream regulated gene 2
5314.01	1.08408	0.0504071	4.29128e-105	1.86801e-102	ENSMUSG00000034336	226180	Ina	internexin neuronal intermediate filament protein, alpha
823.074	2.8971	0.135131	3.07285e-103	1.29828e-100	ENSMUSG00000022893	11504	Adamts1	a disintegrin-like and metallopeptidase (reprolysin type) with thrombospondin type 1 motif, 1
178.226	4.13707	0.192434	4.90801e-103	2.01439e-100	ENSMUSG00000043091	22146	Tuba1c	tubulin, alpha 1C
447.23	2.90287	0.136062	2.91412e-102	1.16281e-99	ENSMUSG00000047786	66643	Lix1	limb and CNS expressed 1
180.497	5.08816	0.241639	4.50984e-99	1.75091e-96	ENSMUSG00000002233	11853	Rhoc	ras homolog family member C
3913.68	2.06447	0.0991503	4.51387e-98	1.70636e-95	ENSMUSG00000021091	20716	Serpina3n	serine (or cysteine) peptidase inhibitor, clade A, member 3N
240.707	2.58567	0.124483	1.87565e-97	6.90864e-95	ENSMUSG00000035673	216161	Sbno2	strawberry notch 2
204.045	2.71734	0.13123	9.98676e-97	3.58649e-94	ENSMUSG00000069793	237886	Slfn9	schlafen 9
1118.51	1.64263	0.0793838	1.61504e-96	5.65855e-94	ENSMUSG00000032012	58235	Nectin1	nectin cell adhesion molecule 1
560.622	1.62153	0.0785924	5.71392e-96	1.9543e-93	ENSMUSG00000036206	98402	Sh3bp4	SH3-domain binding protein 4
1682.84	1.59567	0.0781617	5.01664e-94	1.67591e-91	ENSMUSG00000026558	80914	Uck2	uridine-cytidine kinase 2
284.371	4.63013	0.228799	1.33909e-91	4.37183e-89	ENSMUSG00000068566	50918	Myadm	myeloid-associated differentiation marker
1795.1	1.34233	0.0669208	3.03666e-91	9.6937e-89	ENSMUSG00000024143	104215	Rhoq	ras homolog family member Q
3778.83	2.42337	0.120946	4.55109e-91	1.42123e-88	ENSMUSG00000021708	19418	Rasgrf2	RAS protein-specific guanine nucleotide-releasing factor 2
6488.39	0.761056	0.0381714	2.6001e-90	7.94689e-88	ENSMUSG00000029765	243743	Plxna4	plexin A4
2803.95	1.19458	0.0601231	4.39532e-90	1.31539e-87	ENSMUSG00000032802	76650	Srxn1	sulfiredoxin 1 homolog (S. cerevisiae)
187.331	6.29284	0.321252	1.6166e-86	4.73927e-84	ENSMUSG00000027907	20195	S100a11	S100 calcium binding protein A11
549.818	2.21403	0.11415	1.23088e-85	3.53631e-83	ENSMUSG00000031548	20377	Sfrp1	secreted frizzled-related protein 1
1632.91	1.36508	0.071019	5.01979e-84	1.41391e-81	ENSMUSG00000027533	16592	Fabp5	fatty acid binding protein 5, epidermal
2100.9	1.14836	0.0603611	4.52179e-83	1.24915e-80	ENSMUSG00000025959	93691	Klf7	Kruppel-like factor 7 (ubiquitous)
4747.31	0.896699	0.0471585	6.38504e-83	1.73059e-80	ENSMUSG00000030110	19713	Ret	ret proto-oncogene
1003.04	1.10144	0.0579969	6.81233e-83	1.81221e-80	ENSMUSG00000030095	74122	Tmem43	transmembrane protein 43
151.34	3.7024	0.192799	8.20528e-83	2.14307e-80	ENSMUSG00000039328	68867	Rnf122	ring finger protein 122
1200.27	1.33619	0.0703868	3.93585e-82	1.00962e-79	ENSMUSG00000028367	22166	Txn1	thioredoxin 1
1042.94	1.07275	0.0577754	1.82378e-79	4.59624e-77	ENSMUSG00000034993	26949	Vat1	vesicle amine transport 1
217.692	2.28495	0.122565	2.16034e-79	5.35056e-77	ENSMUSG00000037060	109042	Cavin3	caveolae associated 3
437.82	1.48307	0.079376	2.30844e-79	5.62047e-77	ENSMUSG00000050164	207911	Mchr1	melanin-concentrating hormone receptor 1
136.125	6.88768	0.374554	7.21477e-77	1.72734e-74	ENSMUSG00000031635	26359	Anxa10	annexin A10
1061.87	1.5043	0.0820791	1.81445e-76	4.27287e-74	ENSMUSG00000000627	20355	Sema4f	sema domain, immunoglobulin domain (Ig), TM domain, and short cytoplasmic domain
390.958	3.15542	0.171768	2.22339e-76	5.15145e-74	ENSMUSG00000026547	21346	Tagln2	transgelin 2
728.156	2.31565	0.126972	3.97461e-76	9.06274e-74	ENSMUSG00000069662	17118	Marcks	myristoylated alanine rich protein kinase C substrate
308.912	3.69682	0.202363	3.46146e-75	7.76935e-73	ENSMUSG00000044258	13024	Ctla2a	cytotoxic T lymphocyte-associated protein 2 alpha
1768.1	1.30051	0.073314	2.68984e-72	5.94454e-70	ENSMUSG00000041959	20194	S100a10	S100 calcium binding protein A10 (calpactin)
143.13	6.45985	0.362478	3.39727e-72	7.39421e-70	ENSMUSG00000058665	13798	En1	engrailed 1
646.374	1.50065	0.0849213	2.4926e-71	5.34421e-69	ENSMUSG00000000078	23849	Klf6	Kruppel-like factor 6
383.023	1.27303	0.0733634	1.95947e-69	4.13939e-67	ENSMUSG00000021072	72736	Tmx1	thioredoxin-related transmembrane protein 1
125.043	2.76186	0.159181	7.13443e-69	1.4853e-66	ENSMUSG00000020123	54140	Avpr1a	arginine vasopressin receptor 1A
828.646	1.76232	0.101751	1.05161e-68	2.15805e-66	ENSMUSG00000039470	70546	Zdhhc2	zinc finger, DHHC domain containing 2
482.957	2.52764	0.14656	2.47722e-68	5.01201e-66	ENSMUSG00000026796	227737	Niban2	niban apoptosis regulator 2
640.851	1.03134	0.0604137	7.27015e-68	1.4505e-65	ENSMUSG00000029482	78894	Aacs	acetoacetyl-CoA synthetase
630.126	1.47944	0.0861967	1.65822e-67	3.26306e-65	ENSMUSG00000009418	215690	Nav1	neuron navigator 1
2674.86	1.56632	0.0915691	5.25153e-67	1.01944e-64	ENSMUSG00000037242	29876	Clic4	chloride intracellular channel 4 (mitochondrial)
757.524	1.32955	0.0782365	1.41757e-66	2.71512e-64	ENSMUSG00000028789	242669	Azin2	antizyme inhibitor 2
3300.1	0.687906	0.0405561	3.34913e-66	6.3303e-64	ENSMUSG00000051343	52055	Rab11fip5	RAB11 family interacting protein 5 (class I)
2443.2	1.49089	0.0881835	1.37417e-65	2.56363e-63	ENSMUSG00000052684	16476	Jun	jun proto-oncogene
217.5	1.86537	0.110581	1.88658e-65	3.47444e-63	ENSMUSG00000015647	16776	Lama5	laminin, alpha 5
20924.9	0.840791	0.0500765	2.13582e-65	3.88369e-63	ENSMUSG00000020458	68585	Rtn4	reticulon 4
721.965	1.09203	0.0652915	2.81646e-65	5.05731e-63	ENSMUSG00000052681	215449	Rap1b	RAS related protein 1b
1377.62	0.955892	0.0576092	2.81439e-64	4.9912e-62	ENSMUSG00000038949	226744	Cnst	consortin, connexin sorting protein
8233.67	0.816697	0.0491846	5.73263e-64	1.00426e-61	ENSMUSG00000021939	13030	Ctsb	cathepsin B
4539.76	1.24469	0.0753412	2.1471e-63	3.71603e-61	ENSMUSG00000025809	16412	Itgb1	integrin beta 1 (fibronectin receptor beta)
2580.58	0.995743	0.0607953	8.53551e-63	1.45967e-60	ENSMUSG00000045763	70350	Basp1	brain abundant, membrane attached signal protein 1
1213.14	1.98085	0.120177	9.32771e-63	1.57638e-60	ENSMUSG00000014599	12977	Csf1	colony stimulating factor 1 (macrophage)
180.037	4.10029	0.246774	1.58368e-62	2.64529e-60	ENSMUSG00000027611	19124	Procr	protein C receptor, endothelial
4712.47	1.06536	0.065659	1.02641e-61	1.69475e-59	ENSMUSG00000063524	13806	Eno1	enolase 1, alpha non-neuron
527.233	1.3609	0.0836816	3.41094e-61	5.56797e-59	ENSMUSG00000025612	12013	Bach1	BTB and CNC homology 1, basic leucine zipper transcription factor 1
104.553	3.12351	0.191062	3.98844e-61	6.43752e-59	ENSMUSG00000021070	12062	Bdkrb2	bradykinin receptor, beta 2
265.138	1.77803	0.109379	6.1792e-61	9.8627e-59	ENSMUSG00000028494	11520	Plin2	perilipin 2
131.656	4.74098	0.290364	1.70158e-60	2.68606e-58	ENSMUSG00000030917	233806	Tmem159	transmembrane protein 159
2805.85	-0.714935	0.0443544	3.42004e-60	5.34009e-58	ENSMUSG00000038264	20361	Sema7a	sema domain, immunoglobulin domain (Ig), and GPI membrane anchor, (semaphorin) 7A
814.294	1.33048	0.0831046	1.67779e-59	2.59155e-57	ENSMUSG00000027597	269378	Ahcy	S-adenosylhomocysteine hydrolase
167.754	2.21132	0.138706	4.78231e-59	7.30828e-57	ENSMUSG00000040322	229731	Slc25a24	solute carrier family 25 (mitochondrial carrier, phosphate carrier), member 24
490.285	1.3855	0.087165	1.47718e-58	2.23365e-56	ENSMUSG00000021803	170677	Cdhr1	cadherin-related family member 1
422.284	2.43148	0.153754	4.35697e-58	6.51957e-56	ENSMUSG00000029084	12494	Cd38	CD38 antigen
3980.93	0.683592	0.043246	6.01308e-58	8.90494e-56	ENSMUSG00000002957	11772	Ap2a2	adaptor-related protein complex 2, alpha 2 subunit
525.298	1.40543	0.088979	8.05454e-58	1.18065e-55	ENSMUSG00000075324	60344	Fign	fidgetin
6133.44	1.45547	0.0925729	3.15759e-57	4.5817e-55	ENSMUSG00000025089	14585	Gfra1	glial cell line derived neurotrophic factor family receptor alpha 1
575.416	1.0093	0.0649981	6.8979e-57	9.90883e-55	ENSMUSG00000102697	353237	Pcdhac2	protocadherin alpha subfamily C, 2
941.966	1.36226	0.0874647	2.01068e-56	2.85975e-54	ENSMUSG00000040659	27984	Efhd2	EF hand domain containing 2
276.195	9.29138	0.601258	3.90831e-56	5.5042e-54	ENSMUSG00000029819	109648	Npy	neuropeptide Y
71.1948	5.4569	0.348418	4.79558e-56	6.6882e-54	ENSMUSG00000027840	22414	Wnt2b	wingless-type MMTV integration site family, member 2B
212.717	1.18632	0.0773378	2.2285e-55	3.07812e-53	ENSMUSG00000003752	233011	Itpkc	inositol 1,4,5-trisphosphate 3-kinase C
272.712	2.47028	0.160639	4.29473e-55	5.8756e-53	ENSMUSG00000019960	67603	Dusp6	dual specificity phosphatase 6
3976.49	-0.595883	0.0389474	2.46164e-54	3.33599e-52	ENSMUSG00000045613	243764	Chrm2	cholinergic receptor, muscarinic 2, cardiac
1420.93	0.992139	0.0655838	3.38946e-54	4.55043e-52	ENSMUSG00000011179	18263	Odc1	ornithine decarboxylase, structural 1
3080.83	-0.652625	0.0428862	6.79027e-54	9.03169e-52	ENSMUSG00000050192	208691	Eif5a2	eukaryotic translation initiation factor 5A2
862.371	0.828528	0.0547763	8.88716e-54	1.17123e-51	ENSMUSG00000027198	14043	Ext2	exostosin glycosyltransferase 2
3391.62	0.61504	0.0404967	1.26913e-53	1.65737e-51	ENSMUSG00000039202	54608	Abhd2	abhydrolase domain containing 2
59.2038	5.55503	0.363472	1.59441e-53	2.0634e-51	ENSMUSG00000027919	66195	Lce1g	late cornified envelope 1G
1249.67	0.880817	0.0587657	4.82152e-53	6.18404e-51	ENSMUSG00000006575	51799	Rundc3a	RUN domain containing 3A
166.417	2.01782	0.134683	1.72854e-52	2.19738e-50	ENSMUSG00000029552	21753	Tes	testin LIM domain protein
17259	-0.582497	0.0388965	3.57886e-52	4.50968e-50	ENSMUSG00000049313	20660	Sorl1	sortilin-related receptor, LDLR class A repeats-containing
1013.5	0.946767	0.0640617	7.52676e-52	9.40191e-50	ENSMUSG00000025950	15926	Idh1	isocitrate dehydrogenase 1 (NADP+), soluble
151.551	8.22407	0.555387	1.46753e-51	1.81734e-49	ENSMUSG00000042816	240239	Gpr151	G protein-coupled receptor 151
106.044	2.50919	0.170105	6.06787e-51	7.45e-49	ENSMUSG00000017057	16164	Il13ra1	interleukin 13 receptor, alpha 1
636.72	0.92172	0.0631224	1.16586e-50	1.41929e-48	ENSMUSG00000016256	64138	Ctsz	cathepsin Z
1012.41	0.584677	0.0397838	2.27198e-50	2.74261e-48	ENSMUSG00000040151	23908	Hs2st1	heparan sulfate 2-O-sulfotransferase 1
5775.09	0.794724	0.0546841	7.7922e-50	9.32791e-48	ENSMUSG00000024261	20983	Syt4	synaptotagmin IV
226.048	1.52366	0.105119	4.52606e-49	5.37329e-47	ENSMUSG00000042659	66412	Arrdc4	arrestin domain containing 4
2577.5	-0.635833	0.0440525	8.58595e-49	1.01096e-46	ENSMUSG00000045589	230235	Frrs1l	ferric-chelate reductase 1 like
1747.6	1.13967	0.0797919	1.12749e-48	1.31678e-46	ENSMUSG00000053931	71994	Cnn3	calponin 3, acidic
392.9	1.31387	0.0917316	2.06081e-48	2.38739e-46	ENSMUSG00000029209	67980	Gnpda2	glucosamine-6-phosphate deaminase 2
852.881	1.15408	0.0813298	4.59822e-48	5.28428e-46	ENSMUSG00000024697	14675	Gna14	guanine nucleotide binding protein, alpha 14
118.306	4.90174	0.339893	9.44705e-48	1.07704e-45	ENSMUSG00000028222	12307	Calb1	calbindin 1
483.119	2.5575	0.179704	1.27517e-47	1.44235e-45	ENSMUSG00000026676	74186	Ccdc3	coiled-coil domain containing 3
21041.6	0.604041	0.042453	1.87897e-47	2.1087e-45	ENSMUSG00000027500	20257	Stmn2	stathmin-like 2
327.408	2.49264	0.175778	2.33606e-47	2.60136e-45	ENSMUSG00000030681	78388	Mvp	major vault protein
103.634	2.8521	0.200594	3.12798e-47	3.45642e-45	ENSMUSG00000055723	66922	Rras2	related RAS viral (r-ras) oncogene 2
5766.25	0.815379	0.0581121	8.95016e-47	9.81443e-45	ENSMUSG00000025366	23943	Esyt1	extended synaptotagmin-like protein 1
65.029	4.73441	0.332177	1.15956e-46	1.2619e-44	ENSMUSG00000031074	14174	Fgf3	fibroblast growth factor 3
3320.22	0.568891	0.0404582	2.33269e-46	2.51948e-44	ENSMUSG00000027394	69737	Ttl	tubulin tyrosine ligase
2718.58	-0.634776	0.0452378	2.68254e-46	2.87573e-44	ENSMUSG00000036502	245386	Tmem255a	transmembrane protein 255A
81.2444	5.5387	0.394306	1.31241e-45	1.3965e-43	ENSMUSG00000056306	329641	Sertm1	serine rich and transmembrane domain containing 1
2182.48	-0.759926	0.0549702	2.41699e-45	2.55294e-43	ENSMUSG00000046447	66259	Camk2n1	calcium/calmodulin-dependent protein kinase II inhibitor 1
379.609	0.865235	0.0633639	1.16277e-44	1.21921e-42	ENSMUSG00000022125	211286	Cln5	ceroid-lipofuscinosis, neuronal 5
2133.41	0.758991	0.0554615	1.66775e-44	1.73603e-42	ENSMUSG00000024524	14680	Gnal	guanine nucleotide binding protein, alpha stimulating, olfactory type
48.683	2.9844	0.216882	2.69423e-44	2.78436e-42	ENSMUSG00000029762	14187	Akr1b8	aldo-keto reductase family 1, member B8
112.215	6.38112	0.46626	9.37272e-44	9.61708e-42	ENSMUSG00000019772	22353	Vip	vasoactive intestinal polypeptide
1917.03	1.04997	0.078664	3.79084e-43	3.85917e-41	ENSMUSG00000021140	54604	Pcnx	pecanex homolog
2289.29	-0.698014	0.0517668	3.81484e-43	3.85917e-41	ENSMUSG00000044505	320747	Lingo4	leucine rich repeat and Ig domain containing 4
2468.77	0.792885	0.0591744	6.40744e-43	6.43656e-41	ENSMUSG00000041417	18708	Pik3r1	phosphoinositide-3-kinase regulatory subunit 1
736.898	1.03973	0.0784112	1.21873e-42	1.21577e-40	ENSMUSG00000001542	192657	Ell2	elongation factor for RNA polymerase II 2
441.216	-0.787933	0.0593838	3.82484e-42	3.78923e-40	ENSMUSG00000030350	381813	Prmt8	protein arginine N-methyltransferase 8
1231	0.747011	0.0563734	6.41675e-42	6.31346e-40	ENSMUSG00000027475	16569	Kif3b	kinesin family member 3B
1425.13	0.83434	0.0634495	1.31704e-41	1.28703e-39	ENSMUSG00000052557	209239	Gan	giant axonal neuropathy
723.806	1.18363	0.0903837	1.79855e-41	1.74568e-39	ENSMUSG00000000278	74617	Scpep1	serine carboxypeptidase 1
1303.4	1.46957	0.111803	5.2215e-41	5.03402e-39	ENSMUSG00000028645	20525	Slc2a1	solute carrier family 2 (facilitated glucose transporter), member 1
2300.52	0.93334	0.0726752	3.84464e-40	3.68188e-38	ENSMUSG00000028832	16765	Stmn1	stathmin 1
114.344	1.5804	0.122344	1.25044e-39	1.18958e-37	ENSMUSG00000041736	12257	Tspo	translocator protein
51.5368	4.19645	0.321651	1.9071e-39	1.80233e-37	ENSMUSG00000059991	53324	Nptx2	neuronal pentraxin 2
366.78	3.09789	0.23976	2.69146e-39	2.52698e-37	ENSMUSG00000026728	22352	Vim	vimentin
59.1682	3.93826	0.302736	2.845e-39	2.6538e-37	ENSMUSG00000028599	21938	Tnfrsf1b	tumor necrosis factor receptor superfamily, member 1b
409.336	1.67324	0.130671	5.2639e-39	4.87844e-37	ENSMUSG00000040640	238988	Erc2	ELKS/RAB6-interacting/CAST family member 2
16261.6	-0.518865	0.0404723	5.51541e-39	5.07877e-37	ENSMUSG00000040724	16490	Kcna2	potassium voltage-gated channel, shaker-related subfamily, member 2
933.751	0.932591	0.074477	2.31779e-38	2.1207e-36	ENSMUSG00000033949	28105	Trim36	tripartite motif-containing 36
692.999	0.654009	0.0517373	3.0602e-38	2.78226e-36	ENSMUSG00000029175	74919	Slc35f6	solute carrier family 35, member F6
114.898	2.78565	0.219903	3.26065e-38	2.94586e-36	ENSMUSG00000008398	13713	Elk3	ELK3, member of ETS oncogene family
484.758	-0.920697	0.0746058	2.37891e-37	2.13581e-35	ENSMUSG00000031409	66104	Tceal6	transcription elongation factor A (SII)-like 6
73.3699	5.15652	0.408536	3.39352e-37	3.02782e-35	ENSMUSG00000037362	18133	Ccn3	cellular communication network factor 3
1972.01	0.846041	0.0686852	5.13547e-37	4.55377e-35	ENSMUSG00000048799	225523	Cep120	centrosomal protein 120
43.2129	3.13184	0.251079	8.68629e-37	7.65513e-35	ENSMUSG00000000093	21385	Tbx2	T-box 2
1962.35	0.566404	0.0460307	3.01941e-36	2.64474e-34	ENSMUSG00000048027	68799	Rgmb	repulsive guidance molecule family member B
183.423	1.21179	0.100536	1.13159e-35	9.8517e-34	ENSMUSG00000022620	11883	Arsa	arylsulfatase A
1869.88	-0.824579	0.0688141	3.60059e-35	3.11582e-33	ENSMUSG00000058743	211480	Kcnj14	potassium inwardly-rectifying channel, subfamily J, member 14
419.28	1.10996	0.0945159	2.72009e-34	2.33977e-32	ENSMUSG00000051065	239796	Mb21d2	Mab-21 domain containing 2
66.6006	6.64334	0.555833	3.66839e-34	3.13669e-32	ENSMUSG00000050558	246313	Prokr2	prokineticin receptor 2
1325.47	0.531346	0.0445894	3.99165e-34	3.3929e-32	ENSMUSG00000034591	338365	Slc41a2	solute carrier family 41, member 2
163.065	1.74116	0.14689	6.3095e-34	5.33153e-32	ENSMUSG00000039899	14190	Fgl2	fibrinogen-like protein 2
77.639	2.14889	0.182357	7.44043e-34	6.25039e-32	ENSMUSG00000059645	664837	Gm7361	predicted gene 7361
345.913	1.06972	0.0921455	1.19635e-33	9.99163e-32	ENSMUSG00000044934	238673	Zfp367	zinc finger protein 367
1119	0.915055	0.0786687	1.283e-33	1.06534e-31	ENSMUSG00000019790	78808	Stxbp5	syntaxin binding protein 5 (tomosyn)
815.572	0.979885	0.0845182	1.51527e-33	1.25097e-31	ENSMUSG00000018507	22368	Trpv2	transient receptor potential cation channel, subfamily V, member 2
171.627	1.44624	0.123172	1.8853e-33	1.54756e-31	ENSMUSG00000056749	18030	Nfil3	nuclear factor, interleukin 3, regulated
1408.61	0.586698	0.0502672	5.76456e-33	4.705e-31	ENSMUSG00000045975	207781	C2cd2	C2 calcium-dependent domain containing 2
3993.28	0.560352	0.0480901	8.08905e-33	6.56493e-31	ENSMUSG00000019943	67972	Atp2b1	ATPase, Ca++ transporting, plasma membrane 1
4426.24	0.502585	0.0433155	1.86935e-32	1.5086e-30	ENSMUSG00000023032	59033	Slc4a8	solute carrier family 4 (anion exchanger), member 8
637.224	0.907604	0.0796056	1.94277e-32	1.5591e-30	ENSMUSG00000003623	74114	Crot	carnitine O-octanoyltransferase
4799.78	-0.552407	0.0480453	5.06155e-32	4.0394e-30	ENSMUSG00000007594	330790	Hapln4	hyaluronan and proteoglycan link protein 4
3518.5	-0.514921	0.0450838	1.44333e-31	1.1455e-29	ENSMUSG00000019146	12300	Cacng2	calcium channel, voltage-dependent, gamma subunit 2
1320.63	0.494649	0.0434868	2.72555e-31	2.15124e-29	ENSMUSG00000026155	98366	Smap1	small ArfGAP 1
670.569	0.787493	0.070256	3.92781e-31	3.08322e-29	ENSMUSG00000031681	17125	Smad1	SMAD family member 1
168.489	3.42791	0.299902	4.20551e-31	3.28327e-29	ENSMUSG00000024256	11516	Adcyap1	adenylate cyclase activating polypeptide 1
1766.47	-0.526763	0.0465474	4.52963e-31	3.5172e-29	ENSMUSG00000021772	69721	Nkiras1	NFKB inhibitor interacting Ras-like protein 1
2170.19	0.599514	0.0532664	6.68107e-31	5.15987e-29	ENSMUSG00000039230	108903	Tbcd	tubulin-specific chaperone d
254.267	1.0287	0.0932196	8.21548e-31	6.31098e-29	ENSMUSG00000020205	21664	Phlda1	pleckstrin homology like domain, family A, member 1
705.71	1.1578	0.104955	1.17999e-30	9.01622e-29	ENSMUSG00000070056	52065	Mfhas1	malignant fibrous histiocytoma amplified sequence 1
559.32	1.14978	0.104318	1.26132e-30	9.58673e-29	ENSMUSG00000039661	66959	Dusp26	dual specificity phosphatase 26 (putative)
202.278	1.38135	0.123982	1.34988e-30	1.02058e-28	ENSMUSG00000007041	114584	Clic1	chloride intracellular channel 1
2489.19	-0.513829	0.0457745	1.35906e-30	1.02214e-28	ENSMUSG00000020657	217378	Dnajc27	DnaJ heat shock protein family (Hsp40) member C27
1298.05	0.430889	0.0382562	1.40321e-30	1.04985e-28	ENSMUSG00000029189	231238	Sel1l3	sel-1 suppressor of lin-12-like 3 (C. elegans)
1863.59	-0.381396	0.0337906	1.52064e-30	1.13181e-28	ENSMUSG00000060212	270109	Pcnx2	pecanex homolog 2
260.059	-1.06741	0.0976501	2.65823e-30	1.96176e-28	ENSMUSG00000030137	53857	Tuba8	tubulin, alpha 8
574.024	1.84653	0.166139	2.66303e-30	1.96176e-28	ENSMUSG00000037679	70435	Inf2	inverted formin, FH2 and WH2 domain containing
148.87	2.541	0.229025	2.76621e-30	2.02738e-28	ENSMUSG00000026834	269275	Acvr1c	activin A receptor, type IC
936.84	0.711837	0.0643112	3.11143e-30	2.26882e-28	ENSMUSG00000020457	13494	Drg1	developmentally regulated GTP binding protein 1
1051.15	1.0093	0.0924948	3.27721e-30	2.36705e-28	ENSMUSG00000028780	20348	Sema3c	sema domain, immunoglobulin domain (Ig), short basic domain, secreted, (semaphorin) 3C
109.099	1.85047	0.166783	3.27911e-30	2.36705e-28	ENSMUSG00000044646	207259	Zbtb7c	zinc finger and BTB domain containing 7C
526.493	0.803598	0.0731359	4.14819e-30	2.97944e-28	ENSMUSG00000004846	26433	Plod3	procollagen-lysine, 2-oxoglutarate 5-dioxygenase 3
201.059	1.44937	0.131489	6.91186e-30	4.93974e-28	ENSMUSG00000003352	12297	Cacnb3	calcium channel, voltage-dependent, beta 3 subunit
983.732	0.592098	0.0538912	1.38741e-29	9.86643e-28	ENSMUSG00000025212	94280	Sfxn3	sideroflexin 3
293.958	0.943516	0.0875388	1.72098e-29	1.21782e-27	ENSMUSG00000073158	66808	9030624G23Rik	RIKEN cDNA 9030624G23 gene
659.794	1.54434	0.140877	1.74634e-29	1.22972e-27	ENSMUSG00000030223	19277	Ptpro	protein tyrosine phosphatase, receptor type, O
1149.83	0.620961	0.0566905	1.77127e-29	1.24119e-27	ENSMUSG00000062373	74868	Tmem65	transmembrane protein 65
4756.33	-0.571588	0.0521615	2.08119e-29	1.45128e-27	ENSMUSG00000038370	66425	Pcp4l1	Purkinje cell protein 4-like 1
2885.54	0.869413	0.0806715	2.63921e-29	1.83151e-27	ENSMUSG00000038894	384783	Irs2	insulin receptor substrate 2
106.284	2.04286	0.187939	2.84308e-29	1.9635e-27	ENSMUSG00000036437	18166	Npy1r	neuropeptide Y receptor Y1
111.828	2.39271	0.220465	3.24398e-29	2.22966e-27	ENSMUSG00000039683	330222	Sdk1	sidekick cell adhesion molecule 1
4251.39	0.988895	0.0923823	3.28535e-29	2.24733e-27	ENSMUSG00000020841	12874	Cpd	carboxypeptidase D
2120.32	0.861858	0.0801361	3.53405e-29	2.406e-27	ENSMUSG00000063065	26417	Mapk3	mitogen-activated protein kinase 3
31005.8	0.825287	0.0767256	4.48286e-29	3.03756e-27	ENSMUSG00000072235	22142	Tuba1a	tubulin, alpha 1A
3714.48	0.710259	0.0657161	5.53665e-29	3.73399e-27	ENSMUSG00000032193	16835	Ldlr	low density lipoprotein receptor
105.956	1.59489	0.147924	1.32233e-28	8.87626e-27	ENSMUSG00000029123	64293	Stk32b	serine/threonine kinase 32B
1836.36	0.512648	0.04752	1.74259e-28	1.16429e-26	ENSMUSG00000038205	108097	Prkab2	protein kinase, AMP-activated, beta 2 non-catalytic subunit
1487.47	-0.649669	0.0605444	1.77204e-28	1.17849e-26	ENSMUSG00000066438	217682	Plekhd1	pleckstrin homology domain containing, family D (with coiled-coil domains) member 1
586.238	1.0661	0.101172	1.88855e-28	1.25019e-26	ENSMUSG00000006517	192156	Mvd	mevalonate (diphospho) decarboxylase
1189.44	0.65663	0.0612563	1.93071e-28	1.27223e-26	ENSMUSG00000035199	65106	Arl6ip5	ADP-ribosylation factor-like 6 interacting protein 5
2060.51	0.849383	0.0800988	1.94929e-28	1.27861e-26	ENSMUSG00000021670	15357	Hmgcr	3-hydroxy-3-methylglutaryl-Coenzyme A reductase
785.715	0.584182	0.0547398	4.45119e-28	2.90642e-26	ENSMUSG00000028518	108079	Prkaa2	protein kinase, AMP-activated, alpha 2 catalytic subunit
2256.35	-0.462448	0.0432512	6.41408e-28	4.16915e-26	ENSMUSG00000044847	72290	Lsm11	U7 snRNP-specific Sm-like protein LSM11
164.462	1.63013	0.153329	6.72068e-28	4.34877e-26	ENSMUSG00000074923	214230	Pak6	p21 (RAC1) activated kinase 6
1335.26	-0.466532	0.0439488	1.42941e-27	9.20782e-26	ENSMUSG00000044788	328035	Fads6	fatty acid desaturase domain family, member 6
3990.28	0.989868	0.0957746	1.65608e-27	1.06203e-25	ENSMUSG00000032231	12306	Anxa2	annexin A2
121.808	1.4241	0.135652	1.76974e-27	1.12988e-25	ENSMUSG00000025921	98711	Rdh10	retinol dehydrogenase 10 (all-trans)
67.8821	2.74439	0.260997	2.31976e-27	1.47448e-25	ENSMUSG00000024521	58801	Pmaip1	phorbol-12-myristate-13-acetate-induced protein 1
1409.46	-0.515455	0.0489448	2.7107e-27	1.71538e-25	ENSMUSG00000026158	70155	Ogfrl1	opioid growth factor receptor-like 1
220.037	1.75896	0.167871	3.10015e-27	1.95323e-25	ENSMUSG00000029622	11867	Arpc1b	actin related protein 2/3 complex, subunit 1B
3372.81	0.548957	0.0527723	9.06968e-27	5.68934e-25	ENSMUSG00000004040	20848	Stat3	signal transducer and activator of transcription 3
177.569	1.4174	0.137551	1.28997e-26	8.05671e-25	ENSMUSG00000021701	20620	Plk2	polo like kinase 2
900.857	0.704882	0.0685325	1.46896e-26	9.13492e-25	ENSMUSG00000042734	69480	Ttc9	tetratricopeptide repeat domain 9
4621.9	-0.616238	0.0598482	2.04192e-26	1.26432e-24	ENSMUSG00000030772	50781	Dkk3	dickkopf WNT signaling pathway inhibitor 3
2558.82	0.49301	0.0478861	3.60808e-26	2.22447e-24	ENSMUSG00000041037	210146	Irgq	immunity-related GTPase family, Q
306.17	1.22546	0.121792	5.09616e-26	3.12848e-24	ENSMUSG00000071757	387609	Zhx2	zinc fingers and homeoboxes 2
2698.32	1.24541	0.123908	6.4136e-26	3.92048e-24	ENSMUSG00000005125	17988	Ndrg1	N-myc downstream regulated gene 1
391.009	-0.729895	0.0721216	6.88916e-26	4.19334e-24	ENSMUSG00000035105	112407	Egln3	egl-9 family hypoxia-inducible factor 3
258.485	1.59127	0.156312	7.30822e-26	4.42965e-24	ENSMUSG00000097789	100039239	Gm2115	predicted gene 2115
741.329	0.579363	0.0568661	7.34121e-26	4.43094e-24	ENSMUSG00000020312	216148	Shc2	SHC (Src homology 2 domain containing) transforming protein 2
32.8656	5.20059	0.502024	7.66087e-26	4.60453e-24	ENSMUSG00000028003	79235	Lrat	lecithin-retinol acyltransferase (phosphatidylcholine-retinol-O-acyltransferase)
279.865	0.920219	0.0924519	1.0828e-25	6.48102e-24	ENSMUSG00000029161	68567	Cgref1	cell growth regulator with EF hand domain 1
528.42	-0.67356	0.0666746	1.14473e-25	6.82328e-24	ENSMUSG00000027978	19142	Prss12	protease, serine 12 neurotrypsin (motopsin)
338.518	1.40376	0.139235	1.17235e-25	6.95901e-24	ENSMUSG00000078532	67149	Nkain1	Na+/K+ transporting ATPase interacting 1
84.4142	2.75595	0.271843	1.19838e-25	7.08425e-24	ENSMUSG00000053113	12702	Socs3	suppressor of cytokine signaling 3
150.265	2.21018	0.219605	1.24413e-25	7.32455e-24	ENSMUSG00000067780	94227	Pi15	peptidase inhibitor 15
118.97	2.39742	0.238803	1.73639e-25	1.01809e-23	ENSMUSG00000038059	106878	Smim3	small integral membrane protein 3
155.797	1.48663	0.147836	2.10513e-25	1.22928e-23	ENSMUSG00000052504	13837	Epha3	Eph receptor A3
189.718	2.47436	0.247322	2.70843e-25	1.57516e-23	ENSMUSG00000035413	103743	Tmem98	transmembrane protein 98
2718.18	-0.706744	0.0707865	3.14501e-25	1.8217e-23	ENSMUSG00000031778	20312	Cx3cl1	chemokine (C-X3-C motif) ligand 1
6864.54	-0.415015	0.0409997	3.43099e-25	1.97936e-23	ENSMUSG00000021719	52882	Rgs7bp	regulator of G-protein signalling 7 binding protein
47.6196	9.35862	0.948891	3.50761e-25	2.01547e-23	ENSMUSG00000024803	107765	Ankrd1	ankyrin repeat domain 1 (cardiac muscle)
659.895	0.523513	0.0522029	4.79425e-25	2.7438e-23	ENSMUSG00000046841	216197	Ckap4	cytoskeleton-associated protein 4
537.5	0.599534	0.060304	8.19294e-25	4.6703e-23	ENSMUSG00000039546	230959	Ajap1	adherens junction associated protein 1
432.128	-0.647715	0.0653881	9.44518e-25	5.36285e-23	ENSMUSG00000034227	15223	Foxj1	forkhead box J1
505.788	0.78099	0.0794901	9.5765e-25	5.416e-23	ENSMUSG00000024781	16889	Lipa	lysosomal acid lipase A
1689.73	-0.42282	0.0425403	2.07703e-24	1.17006e-22	ENSMUSG00000057455	19762	Rit2	Ras-like without CAAX 2
487.901	0.673517	0.0687845	2.57139e-24	1.44289e-22	ENSMUSG00000002633	20423	Shh	sonic hedgehog
4756.49	-0.48633	0.04933	3.17063e-24	1.77222e-22	ENSMUSG00000056602	320365	Fry	FRY microtubule binding protein
1617.4	-0.533546	0.0542593	3.23327e-24	1.80023e-22	ENSMUSG00000024901	240518	Peli3	pellino 3
391.269	0.739502	0.0761007	3.63646e-24	2.0169e-22	ENSMUSG00000024079	19106	Eif2ak2	eukaryotic translation initiation factor 2-alpha kinase 2
7130.01	-0.677578	0.0696045	4.41044e-24	2.43677e-22	ENSMUSG00000045246	66733	Kcng4	potassium voltage-gated channel, subfamily G, member 4
1188.62	-0.629044	0.0645817	5.30476e-24	2.91965e-22	ENSMUSG00000055782	26874	Abcd2	ATP-binding cassette, sub-family D (ALD), member 2
1056.41	0.436537	0.0444037	5.58693e-24	3.06322e-22	ENSMUSG00000027303	19262	Ptpra	protein tyrosine phosphatase, receptor type, A
234.753	2.02168	0.208552	5.86249e-24	3.20208e-22	ENSMUSG00000034205	94352	Loxl2	lysyl oxidase-like 2
31.5939	2.46675	0.254514	6.00879e-24	3.26955e-22	ENSMUSG00000045725	78004	Prr15	proline rich 15
125.322	2.18751	0.226133	6.18884e-24	3.35482e-22	ENSMUSG00000037016	242022	Frem2	Fras1 related extracellular matrix protein 2
1061.82	-0.49627	0.0508484	8.01386e-24	4.32778e-22	ENSMUSG00000029875	239650	Ccdc184	coiled-coil domain containing 184
90.8956	2.06431	0.214104	9.26788e-24	4.98626e-22	ENSMUSG00000026355	17219	Mcm6	minichromosome maintenance complex component 6
467.715	1.03858	0.109839	1.05017e-23	5.62896e-22	ENSMUSG00000007613	21812	Tgfbr1	transforming growth factor, beta receptor I
406.43	-0.657854	0.0683469	1.42046e-23	7.58548e-22	ENSMUSG00000069911	574403	Insyn2b	inhibitory synaptic factor family member 2B
1323.47	0.551276	0.0570733	1.65481e-23	8.80421e-22	ENSMUSG00000058443	100043346	Rpl10-ps3	ribosomal protein L10, pseudogene 3
48.381	1.6951	0.176089	1.79089e-23	9.49305e-22	ENSMUSG00000058952	12630	Cfi	complement component factor i
1463.37	0.406814	0.0418127	1.86466e-23	9.84771e-22	ENSMUSG00000007021	20974	Syngr3	synaptogyrin 3
530.676	1.62032	0.169127	2.80417e-23	1.47553e-21	ENSMUSG00000023827	68262	Agpat4	1-acylglycerol-3-phosphate O-acyltransferase 4 (lysophosphatidic acid acyltransferase, delta)
5886.25	0.592365	0.0619455	3.51959e-23	1.84522e-21	ENSMUSG00000036427	14751	Gpi1	glucose-6-phosphate isomerase 1
528.725	0.689666	0.0725809	3.94015e-23	2.05819e-21	ENSMUSG00000028773	14077	Fabp3	fatty acid binding protein 3, muscle and heart
84.9523	8.8911	0.949093	5.46512e-23	2.84444e-21	ENSMUSG00000035373	20306	Ccl7	chemokine (C-C motif) ligand 7
320.52	-0.738912	0.0783088	5.52813e-23	2.86684e-21	ENSMUSG00000001566	15285	Mnx1	motor neuron and pancreas homeobox 1
243.611	1.11602	0.120952	1.02879e-22	5.31603e-21	ENSMUSG00000000058	12390	Cav2	caveolin 2
177.092	1.42682	0.151871	1.04482e-22	5.37952e-21	ENSMUSG00000021453	23882	Gadd45g	growth arrest and DNA-damage-inducible 45 gamma
3077.65	-0.488542	0.0514464	1.08293e-22	5.55583e-21	ENSMUSG00000020785	55984	Camkk1	calcium/calmodulin-dependent protein kinase kinase 1, alpha
1090.24	1.07735	0.116961	1.0894e-22	5.56912e-21	ENSMUSG00000022231	20356	Sema5a	sema domain, seven thrombospondin repeats (type 1 and type 1-like), transmembrane domain (TM) and short cytoplasmic domain, (semaphorin) 5A
394.756	1.03042	0.111914	1.10018e-22	5.60429e-21	ENSMUSG00000037035	16324	Inhbb	inhibin beta-B
2228.92	0.500455	0.05315	2.18975e-22	1.11151e-20	ENSMUSG00000027479	13589	Mapre1	microtubule-associated protein, RP/EB family, member 1
2574.28	0.462712	0.049244	3.24308e-22	1.64038e-20	ENSMUSG00000024777	225849	Ppp2r5b	protein phosphatase 2, regulatory subunit B', beta
51.703	8.81455	0.959858	3.26079e-22	1.64355e-20	ENSMUSG00000035385	20296	Ccl2	chemokine (C-C motif) ligand 2
655.892	-0.450501	0.047928	3.38437e-22	1.69988e-20	ENSMUSG00000037196	69310	Pacrg	PARK2 co-regulated
1434.35	-0.581989	0.0624055	3.51588e-22	1.75978e-20	ENSMUSG00000022489	18574	Pde1b	phosphodiesterase 1B, Ca2+-calmodulin dependent
77.7602	2.68035	0.288743	4.3798e-22	2.18458e-20	ENSMUSG00000020427	16009	Igfbp3	insulin-like growth factor binding protein 3
79.576	-22.2024	2.34641	4.55884e-22	2.26601e-20	ENSMUSG00000052539	99470	Magi3	membrane associated guanylate kinase, WW and PDZ domain containing 3
2719.2	0.409166	0.0436141	5.27521e-22	2.61305e-20	ENSMUSG00000026496	11545	Parp1	poly (ADP-ribose) polymerase family, member 1
2193.92	-0.389684	0.0416598	7.89782e-22	3.8987e-20	ENSMUSG00000034245	232232	Hdac11	histone deacetylase 11
1718.54	0.393237	0.0420901	8.55036e-22	4.20637e-20	ENSMUSG00000043004	14702	Gng2	guanine nucleotide binding protein (G protein), gamma 2
774.195	0.684478	0.0745982	8.76684e-22	4.29814e-20	ENSMUSG00000032867	231672	Fbxw8	F-box and WD-40 domain protein 8
1456.38	0.50528	0.0545985	9.79205e-22	4.78445e-20	ENSMUSG00000020611	14674	Gna13	guanine nucleotide binding protein, alpha 13
85.2428	2.18126	0.238869	1.07986e-21	5.25838e-20	ENSMUSG00000040274	12571	Cdk6	cyclin-dependent kinase 6
4082.69	0.41669	0.0448153	1.1018e-21	5.34706e-20	ENSMUSG00000029777	353172	Gars	glycyl-tRNA synthetase
511.03	0.749809	0.082347	1.13171e-21	5.47376e-20	ENSMUSG00000054855	223881	Rnd1	Rho family GTPase 1
356.943	0.856473	0.0950936	1.37317e-21	6.6193e-20	ENSMUSG00000031904	330836	Slc7a6	solute carrier family 7 (cationic amino acid transporter, y+ system), member 6
1806.12	-0.399687	0.043056	1.43144e-21	6.87713e-20	ENSMUSG00000041058	107568	Wwp1	WW domain containing E3 ubiquitin protein ligase 1
435.144	0.874698	0.0973071	1.43836e-21	6.88732e-20	ENSMUSG00000034310	243274	Tmem132d	transmembrane protein 132D
6797.24	-0.354649	0.0380626	1.47292e-21	7.02942e-20	ENSMUSG00000018548	68729	Trim37	tripartite motif-containing 37
1129.56	0.39151	0.0421767	1.52564e-21	7.25691e-20	ENSMUSG00000003235	224045	Eif2b5	eukaryotic translation initiation factor 2B, subunit 5 epsilon
2275.66	-0.550958	0.0601004	1.77382e-21	8.40954e-20	ENSMUSG00000001986	53623	Gria3	glutamate receptor, ionotropic, AMPA3 (alpha 3)
955.873	0.665813	0.0731775	1.96627e-21	9.29129e-20	ENSMUSG00000024772	13660	Ehd1	EH-domain containing 1
605.44	-0.613607	0.067318	2.17344e-21	1.02365e-19	ENSMUSG00000093536	100042450	Smim17	small integral membrane protein 17
550.088	5.19713	0.55743	2.2331e-21	1.04831e-19	ENSMUSG00000000120	18053	Ngfr	nerve growth factor receptor (TNFR superfamily, member 16)
575.104	-0.927946	0.104314	2.5147e-21	1.17666e-19	ENSMUSG00000011171	22355	Vipr2	vasoactive intestinal peptide receptor 2
523.064	0.810452	0.090335	2.56e-21	1.19397e-19	ENSMUSG00000028639	22608	Ybx1	Y box protein 1
1869.27	0.611154	0.0674108	3.44348e-21	1.60083e-19	ENSMUSG00000008730	15257	Hipk1	homeodomain interacting protein kinase 1
3200.41	0.556591	0.0612416	3.57777e-21	1.65789e-19	ENSMUSG00000032625	330267	Thsd7a	thrombospondin, type I, domain containing 7A
622.417	0.94719	0.10716	3.85812e-21	1.78206e-19	ENSMUSG00000027852	18176	Nras	neuroblastoma ras oncogene
1781.61	-0.324283	0.035125	4.2628e-21	1.96266e-19	ENSMUSG00000015087	227624	Rabl6	RAB, member RAS oncogene family-like 6
783.832	-0.445101	0.0487731	4.5333e-21	2.08054e-19	ENSMUSG00000032350	14629	Gclc	glutamate-cysteine ligase, catalytic subunit
500.99	1.29704	0.145692	4.87318e-21	2.2294e-19	ENSMUSG00000034295	225288	Fhod3	formin homology 2 domain containing 3
2777.05	-0.506402	0.0557873	5.02125e-21	2.28985e-19	ENSMUSG00000051335	328232	Gfod1	glucose-fructose oxidoreductase domain containing 1
105.827	6.24016	0.684686	6.79011e-21	3.08671e-19	ENSMUSG00000021876	58809	Rnase4	ribonuclease, RNase A family 4
3889.01	0.358061	0.0391372	6.91452e-21	3.13335e-19	ENSMUSG00000022752	28185	Tomm70a	translocase of outer mitochondrial membrane 70A
678.254	-0.623868	0.0695895	8.15387e-21	3.68335e-19	ENSMUSG00000026468	16872	Lhx4	LIM homeobox protein 4
729.389	-0.838217	0.0953316	1.06015e-20	4.77398e-19	ENSMUSG00000035745	170483	Grin3b	glutamate receptor, ionotropic, NMDA3B
415.102	0.760339	0.0859483	1.1032e-20	4.95236e-19	ENSMUSG00000109901	67064	Chmp1b	charged multivesicular body protein 1B
1137.22	-0.532831	0.0593931	1.16207e-20	5.20036e-19	ENSMUSG00000022075	246710	Rhobtb2	Rho-related BTB domain containing 2
1219.03	0.579201	0.064752	1.19546e-20	5.33315e-19	ENSMUSG00000037470	320011	Uggt1	UDP-glucose glycoprotein glucosyltransferase 1
2132.07	0.339978	0.0373671	1.28543e-20	5.71678e-19	ENSMUSG00000026341	74117	Actr3	ARP3 actin-related protein 3
1432.09	-0.637533	0.0715911	1.31055e-20	5.81049e-19	ENSMUSG00000024601	66307	Isoc1	isochorismatase domain containing 1
1369.15	-0.597437	0.0669701	1.36815e-20	6.04721e-19	ENSMUSG00000042129	213391	Rassf4	Ras association (RalGDS/AF-6) domain family member 4
2017.15	-0.522272	0.058367	1.50744e-20	6.64244e-19	ENSMUSG00000096847	210573	Tmem151b	transmembrane protein 151B
783.854	0.828125	0.0945388	1.51878e-20	6.67195e-19	ENSMUSG00000024404	66878	Riok3	RIO kinase 3
521.529	0.769013	0.087521	1.77519e-20	7.77459e-19	ENSMUSG00000025967	55949	Eef1b2	eukaryotic translation elongation factor 1 beta 2
880.044	0.91183	0.105918	3.4643e-20	1.51261e-18	ENSMUSG00000026074	26921	Map4k4	mitogen-activated protein kinase kinase kinase kinase 4
188.565	1.00605	0.11739	3.53719e-20	1.53975e-18	ENSMUSG00000048696	237400	Mex3d	mex3 RNA binding family member D
72.2377	3.7485	0.416043	3.86252e-20	1.67629e-18	ENSMUSG00000000805	12351	Car4	carbonic anhydrase 4
245.671	1.80209	0.205926	5.18691e-20	2.24428e-18	ENSMUSG00000030748	16190	Il4ra	interleukin 4 receptor, alpha
320.757	1.26399	0.146795	5.27698e-20	2.27639e-18	ENSMUSG00000094910	268595	D430019H16Rik	RIKEN cDNA D430019H16 gene
32.9682	3.10412	0.351138	6.2498e-20	2.68798e-18	ENSMUSG00000062168	237178	Ppef1	protein phosphatase with EF hand calcium-binding domain 1
13442.1	-0.169117	0.0186417	7.05437e-20	3.02496e-18	ENSMUSG00000027624	13821	Epb41l1	erythrocyte membrane protein band 4.1 like 1
872.485	-1.0049	0.11842	7.35365e-20	3.1439e-18	ENSMUSG00000029838	19242	Ptn	pleiotrophin
12141.1	0.652772	0.0750121	7.38171e-20	3.14653e-18	ENSMUSG00000058672	22151	Tubb2a	tubulin, beta 2A class IIA
1891.77	-0.309405	0.0346951	8.74856e-20	3.71814e-18	ENSMUSG00000019189	74315	Rnf145	ring finger protein 145
1254.77	0.910811	0.107208	9.29144e-20	3.93721e-18	ENSMUSG00000087141	433022	Plcxd2	phosphatidylinositol-specific phospholipase C, X domain containing 2
530.413	-0.593237	0.0681888	9.9629e-20	4.20933e-18	ENSMUSG00000030222	232441	Rerg	RAS-like, estrogen-regulated, growth-inhibitor
193.18	0.851191	0.0998378	1.0102e-19	4.25559e-18	ENSMUSG00000048965	244238	Mrgpre	MAS-related GPR, member E
24.0842	8.24261	0.9645	1.53871e-19	6.46303e-18	ENSMUSG00000073494	545378	Sh2d1b2	SH2 domain containing 1B2
661.779	0.556005	0.0642877	1.84559e-19	7.72943e-18	ENSMUSG00000021400	78903	Wrnip1	Werner helicase interacting protein 1
21.7521	3.37505	0.385308	2.15305e-19	8.99087e-18	ENSMUSG00000099655	NA	NA	NA
585.174	0.570525	0.0662385	2.35574e-19	9.80875e-18	ENSMUSG00000028869	230737	Gnl2	guanine nucleotide binding protein-like 2 (nucleolar)
581.23	0.763251	0.0898587	2.36845e-19	9.83318e-18	ENSMUSG00000031402	17524	Mpp1	membrane protein, palmitoylated
1247.96	-0.830822	0.09847	2.45987e-19	1.01833e-17	ENSMUSG00000017737	17395	Mmp9	matrix metallopeptidase 9
534.712	0.745276	0.0878271	2.85121e-19	1.17694e-17	ENSMUSG00000026643	18108	Nmt2	N-myristoyltransferase 2
14660.9	0.490761	0.0569189	3.20301e-19	1.31838e-17	ENSMUSG00000026667	16589	Uhmk1	U2AF homology motif (UHM) kinase 1
532.896	1.0606	0.128051	4.06667e-19	1.66908e-17	ENSMUSG00000037933	76895	Bicd2	BICD cargo adaptor 2
670.791	-0.709531	0.0838793	4.45867e-19	1.82475e-17	ENSMUSG00000067879	76982	Vxn	vexin
828.7	-0.560919	0.0657114	4.79947e-19	1.95865e-17	ENSMUSG00000039058	229949	Ak5	adenylate kinase 5
596.913	0.929718	0.11219	5.02802e-19	2.0461e-17	ENSMUSG00000028434	54357	Epb41l4b	erythrocyte membrane protein band 4.1 like 4b
1923.04	-0.305045	0.0349582	5.05048e-19	2.04944e-17	ENSMUSG00000036450	319594	Hif1an	hypoxia-inducible factor 1, alpha subunit inhibitor
1179.42	0.738115	0.0876341	5.1075e-19	2.06674e-17	ENSMUSG00000021996	13885	Esd	esterase D/formylglutathione hydrolase
33899	-0.415142	0.048337	6.83225e-19	2.75689e-17	ENSMUSG00000027273	20614	Snap25	synaptosomal-associated protein 25
845.673	0.696655	0.0828556	7.40502e-19	2.97964e-17	ENSMUSG00000036737	108737	Oxsr1	oxidative-stress responsive 1
1884.48	0.546506	0.0644066	7.94228e-19	3.18689e-17	ENSMUSG00000026014	77300	Raph1	Ras association (RalGDS/AF-6) and pleckstrin homology domains 1
1635.03	-0.741292	0.0886138	8.13406e-19	3.25476e-17	ENSMUSG00000037855	216049	Zfp365	zinc finger protein 365
5067.12	0.387902	0.0451732	8.44929e-19	3.3715e-17	ENSMUSG00000049470	93736	Aff4	AF4/FMR2 family, member 4
1262.33	1.22028	0.148193	1.01712e-18	4.03618e-17	ENSMUSG00000001552	16480	Jup	junction plakoglobin
1657.58	-0.442186	0.0518879	1.01503e-18	4.03618e-17	ENSMUSG00000038582	320717	Pptc7	PTC7 protein phosphatase homolog
208.62	1.12375	0.137276	1.02553e-18	4.05832e-17	ENSMUSG00000062257	330908	Opcml	opioid binding protein/cell adhesion molecule-like
749.423	0.597166	0.0709478	1.13016e-18	4.46008e-17	ENSMUSG00000034040	212996	Galnt17	polypeptide N-acetylgalactosaminyltransferase 17
1660.74	0.586939	0.0697406	1.19353e-18	4.69727e-17	ENSMUSG00000033379	114143	Atp6v0b	ATPase, H+ transporting, lysosomal V0 subunit B
795.555	0.625758	0.0746055	1.27092e-18	4.98819e-17	ENSMUSG00000031349	18194	Nsdhl	NAD(P) dependent steroid dehydrogenase-like
2686.26	0.614046	0.0732174	1.35349e-18	5.29777e-17	ENSMUSG00000022351	20775	Sqle	squalene epoxidase
89.3905	1.4997	0.17988	1.55172e-18	6.05717e-17	ENSMUSG00000044813	230126	Shb	src homology 2 domain-containing transforming protein B
2529.02	-0.350503	0.041045	1.725e-18	6.71536e-17	ENSMUSG00000075478	76965	Slitrk1	SLIT and NTRK-like family, member 1
109.42	1.60614	0.192866	2.04355e-18	7.93393e-17	ENSMUSG00000031628	12367	Casp3	caspase 3
2723.88	0.502545	0.0598372	2.06498e-18	7.99555e-17	ENSMUSG00000001847	19353	Rac1	Rac family small GTPase 1
367.839	0.798695	0.0973411	2.14389e-18	8.27877e-17	ENSMUSG00000030630	14085	Fah	fumarylacetoacetate hydrolase
2369.06	0.306352	0.0358316	2.33292e-18	8.98456e-17	ENSMUSG00000038555	225362	Reep2	receptor accessory protein 2
378.495	-0.624821	0.0752053	2.49257e-18	9.57375e-17	ENSMUSG00000037843	277432	Vstm2l	V-set and transmembrane domain containing 2-like
240.039	0.935972	0.116155	3.28273e-18	1.2575e-16	ENSMUSG00000038128	12326	Camk4	calcium/calmodulin-dependent protein kinase IV
606.417	0.537887	0.0646853	3.50079e-18	1.33747e-16	ENSMUSG00000035713	244144	Usp35	ubiquitin specific peptidase 35
167.994	1.13621	0.14139	3.66427e-18	1.39621e-16	ENSMUSG00000038459	70178	Abhd17c	abhydrolase domain containing 17C
2822.07	-0.438607	0.0524404	4.01256e-18	1.52488e-16	ENSMUSG00000042182	320705	Bend6	BEN domain containing 6
988.494	0.586576	0.0710071	4.42365e-18	1.67667e-16	ENSMUSG00000022353	211401	Mtss1	MTSS I-BAR domain containing 1
109.147	2.27751	0.279187	5.4912e-18	2.07582e-16	ENSMUSG00000095115	319622	Itpripl2	inositol 1,4,5-triphosphate receptor interacting protein-like 2
1698.18	-0.428898	0.0514763	5.6054e-18	2.11343e-16	ENSMUSG00000033781	142688	Asb13	ankyrin repeat and SOCS box-containing 13
1520.68	-0.350518	0.0418723	7.29922e-18	2.74485e-16	ENSMUSG00000108348	105247240	Pnma8c	PNMA family member 8C
1221.84	-0.328547	0.0393002	9.71339e-18	3.64316e-16	ENSMUSG00000020032	77976	Nuak1	NUAK family, SNF1-like kinase, 1
111.915	1.39396	0.17305	1.05386e-17	3.94238e-16	ENSMUSG00000048644	330695	Ctxn1	cortexin 1
532.831	1.04418	0.132447	1.07734e-17	4.01707e-16	ENSMUSG00000004099	13433	Dnmt1	DNA methyltransferase (cytosine-5) 1
332.026	0.59154	0.0725766	1.07942e-17	4.01707e-16	ENSMUSG00000021501	12328	Caml	calcium modulating ligand
320.847	1.67383	0.20605	1.13031e-17	4.19558e-16	ENSMUSG00000025608	27205	Podxl	podocalyxin-like
664.539	0.478861	0.0583484	1.17533e-17	4.35146e-16	ENSMUSG00000037306	230815	Man1c1	mannosidase, alpha, class 1C, member 1
19.2825	7.91841	0.98261	1.25189e-17	4.62298e-16	ENSMUSG00000091897	66773	Gm17019	predicted gene 17019
1317.85	0.429288	0.0521337	1.26832e-17	4.66173e-16	ENSMUSG00000003153	20527	Slc2a3	solute carrier family 2 (facilitated glucose transporter), member 3
770.343	-0.519552	0.0635811	1.27212e-17	4.66173e-16	ENSMUSG00000027971	64580	Ndst4	N-deacetylase/N-sulfotransferase (heparin glucosaminyl) 4
16.7524	7.74465	0.958919	1.26991e-17	4.66173e-16	ENSMUSG00000072188	100503549	Gm10354	predicted gene 10354
3025.14	-0.271219	0.0323703	1.40133e-17	5.12217e-16	ENSMUSG00000034958	16467	Atcay	ataxia, cerebellar, Cayman type
520.68	0.78814	0.0989893	1.67762e-17	6.11649e-16	ENSMUSG00000000001	14679	Gnai3	guanine nucleotide binding protein (G protein), alpha inhibiting 3
112.718	1.27323	0.160769	1.7202e-17	6.25587e-16	ENSMUSG00000048070	193003	Pirt	phosphoinositide-interacting regulator of transient receptor potential channels
6831.6	0.339077	0.0410588	2.08442e-17	7.56129e-16	ENSMUSG00000062070	18655	Pgk1	phosphoglycerate kinase 1
1493.28	0.590875	0.0732597	2.17486e-17	7.86949e-16	ENSMUSG00000039542	17967	Ncam1	neural cell adhesion molecule 1
187.917	1.12513	0.144115	2.23354e-17	8.06153e-16	ENSMUSG00000026107	109019	Nabp1	nucleic acid binding protein 1
2543.1	0.403382	0.0492727	2.25993e-17	8.1363e-16	ENSMUSG00000034390	74440	Cmip	c-Maf inducing protein
330.743	2.06406	0.258245	2.29166e-17	8.22991e-16	ENSMUSG00000070509	244058	Rgma	repulsive guidance molecule family member A
1904.31	0.434335	0.0533372	2.61432e-17	9.36525e-16	ENSMUSG00000028842	214150	Ago3	argonaute RISC catalytic subunit 3
906.322	0.472607	0.0583884	3.09024e-17	1.10426e-15	ENSMUSG00000021036	20773	Sptlc2	serine palmitoyltransferase, long chain base subunit 2
696.701	0.730524	0.0922128	3.32914e-17	1.18374e-15	ENSMUSG00000034663	140780	Bmp2k	BMP2 inducible kinase
500.144	-0.630433	0.0788993	3.32368e-17	1.18374e-15	ENSMUSG00000057329	12043	Bcl2	B cell leukemia/lymphoma 2
166.461	0.831765	0.106432	4.08966e-17	1.45057e-15	ENSMUSG00000069755	382686	3110053B16Rik	RIKEN cDNA 3110053B16 gene
1906.07	0.472951	0.0586843	4.10595e-17	1.45276e-15	ENSMUSG00000059796	13681	Eif4a1	eukaryotic translation initiation factor 4A1
2621.36	0.282983	0.0344049	4.57678e-17	1.61537e-15	ENSMUSG00000025139	54473	Tollip	toll interacting protein
1611.48	-0.482066	0.0600636	5.11538e-17	1.79766e-15	ENSMUSG00000024074	50766	Crim1	cysteine rich transmembrane BMP regulator 1 (chordin like)
527.579	0.749499	0.0954363	5.11828e-17	1.79766e-15	ENSMUSG00000038683	68083	Pak1ip1	PAK1 interacting protein 1
1238.8	0.431986	0.0536898	5.89865e-17	2.06669e-15	ENSMUSG00000032666	69399	1700025G04Rik	RIKEN cDNA 1700025G04 gene
3576.89	-0.375061	0.0463568	6.19553e-17	2.16542e-15	ENSMUSG00000030357	14228	Fkbp4	FK506 binding protein 4
8751.85	-0.373874	0.0462588	6.70749e-17	2.33867e-15	ENSMUSG00000052949	217340	Rnf157	ring finger protein 157
1257.73	0.688805	0.0876142	6.8734e-17	2.39071e-15	ENSMUSG00000024665	56473	Fads2	fatty acid desaturase 2
6095.88	0.260773	0.0318113	7.07037e-17	2.45328e-15	ENSMUSG00000058254	21912	Tspan7	tetraspanin 7
1265.2	0.978492	0.127983	7.71701e-17	2.6712e-15	ENSMUSG00000056515	106572	Rab31	RAB31, member RAS oncogene family
391.152	0.467518	0.0586727	8.87724e-17	3.06542e-15	ENSMUSG00000006281	21745	Tep1	telomerase associated protein 1
465.353	-0.557743	0.0705356	9.10112e-17	3.13519e-15	ENSMUSG00000034171	14073	Faah	fatty acid amide hydrolase
33.0014	6.09192	0.759745	1.03442e-16	3.55488e-15	ENSMUSG00000030905	12971	Crym	crystallin, mu
327.53	0.84024	0.109356	1.08888e-16	3.73313e-15	ENSMUSG00000046378	233879	Asphd1	aspartate beta-hydroxylase domain containing 1
323.494	1.4748	0.189287	1.14525e-16	3.91702e-15	ENSMUSG00000025020	20562	Slit1	slit guidance ligand 1
1683.84	-0.406389	0.0511767	1.65174e-16	5.63592e-15	ENSMUSG00000007950	64296	Abhd8	abhydrolase domain containing 8
1380.96	0.638489	0.0820427	1.67633e-16	5.70628e-15	ENSMUSG00000018199	20822	Ro60	Ro60, Y RNA binding protein
526.52	0.789765	0.10319	1.89504e-16	6.43553e-15	ENSMUSG00000003348	208228	Mob3a	MOB kinase activator 3A
961.982	0.338851	0.0424195	1.93645e-16	6.56062e-15	ENSMUSG00000019777	15182	Hdac2	histone deacetylase 2
86.6017	1.68373	0.21687	1.95192e-16	6.59749e-15	ENSMUSG00000066197	209776	Gpr139	G protein-coupled receptor 139
16275.6	-0.640942	0.0825924	1.96983e-16	6.6424e-15	ENSMUSG00000062785	16504	Kcnc3	potassium voltage gated channel, Shaw-related subfamily, member 3
1142.17	-0.485566	0.0618702	2.0977e-16	7.05701e-15	ENSMUSG00000030301	67015	Ccdc91	coiled-coil domain containing 91
751.134	-0.679976	0.0882254	2.43277e-16	8.16513e-15	ENSMUSG00000045994	76898	B3gat1	beta-1,3-glucuronyltransferase 1 (glucuronosyltransferase P)
594.627	22.6521	2.85141	2.54635e-16	8.52643e-15	ENSMUSG00000045973	230125	Slc25a51	solute carrier family 25, member 51
1490.94	0.424445	0.0539476	2.61594e-16	8.73906e-15	ENSMUSG00000021823	22330	Vcl	vinculin
1689.1	0.38434	0.0487405	3.0427e-16	1.01411e-14	ENSMUSG00000004530	23790	Coro1c	coronin, actin binding protein 1C
16.1456	7.51033	0.976842	3.5765e-16	1.18927e-14	ENSMUSG00000076498	100125263	Trbc2	T cell receptor beta, constant 2
2739.98	-0.358032	0.0454013	3.74556e-16	1.24261e-14	ENSMUSG00000042428	17309	Mgat3	mannoside acetylglucosaminyltransferase 3
131.399	0.954551	0.128232	3.90125e-16	1.29128e-14	ENSMUSG00000009566	14287	Fpgs	folylpolyglutamyl synthetase
4017.61	-0.299841	0.0377516	3.97736e-16	1.31344e-14	ENSMUSG00000029108	54216	Pcdh7	protocadherin 7
437.052	0.578451	0.0750767	4.09408e-16	1.34889e-14	ENSMUSG00000034247	353047	Plekhm1	pleckstrin homology domain containing, family M (with RUN domain) member 1
3032.85	0.316711	0.0400036	4.18255e-16	1.37488e-14	ENSMUSG00000071644	67160	Eef1g	eukaryotic translation elongation factor 1 gamma
350.762	0.890754	0.119252	4.22891e-16	1.38695e-14	ENSMUSG00000033306	210126	Lpp	LIM domain containing preferred translocation partner in lipoma
805.217	-0.482682	0.0622101	4.32014e-16	1.41364e-14	ENSMUSG00000025277	66082	Abhd6	abhydrolase domain containing 6
1438.3	-0.385763	0.0492295	4.46501e-16	1.45772e-14	ENSMUSG00000057716	434008	Tmem178b	transmembrane protein 178B
22.1325	2.32848	0.306	4.52233e-16	1.47309e-14	ENSMUSG00000034107	404545	Ano7	anoctamin 7
708.262	-0.7051	0.0927087	4.63902e-16	1.50768e-14	ENSMUSG00000040972	230868	Igsf21	immunoglobulin superfamily, member 21
619.584	0.680269	0.0893282	4.94576e-16	1.60374e-14	ENSMUSG00000022895	23872	Ets2	E26 avian leukemia oncogene 2, 3' domain
622.861	0.513202	0.0665306	5.22702e-16	1.69113e-14	ENSMUSG00000022419	97998	Deptor	DEP domain containing MTOR-interacting protein
61.374	19.1408	2.43229	5.74728e-16	1.85527e-14	ENSMUSG00000022185	56215	Acin1	apoptotic chromatin condensation inducer 1
615.423	-0.72393	0.0957533	5.86789e-16	1.88996e-14	ENSMUSG00000020866	12291	Cacna1g	calcium channel, voltage-dependent, T type, alpha 1G subunit
2001.07	0.379513	0.0486322	6.05708e-16	1.94653e-14	ENSMUSG00000001380	15115	Hars	histidyl-tRNA synthetase
77.6297	2.16955	0.286707	6.19273e-16	1.98568e-14	ENSMUSG00000052942	226075	Glis3	GLIS family zinc finger 3
1654.76	0.488087	0.0633174	6.22217e-16	1.98673e-14	ENSMUSG00000018846	211347	Pank3	pantothenate kinase 3
914.637	1.04669	0.142172	6.22365e-16	1.98673e-14	ENSMUSG00000029581	14086	Fscn1	fascin actin-bundling protein 1
13.0037	7.34363	0.962354	6.59361e-16	2.10016e-14	ENSMUSG00000019932	16545	Kera	keratocan
717.909	0.774099	0.103192	6.71897e-16	2.13535e-14	ENSMUSG00000039637	78885	Coro7	coronin 7
1909.23	0.59073	0.0777002	8.52999e-16	2.70493e-14	ENSMUSG00000010663	76267	Fads1	fatty acid desaturase 1
254.26	1.41391	0.188839	9.23877e-16	2.92324e-14	ENSMUSG00000044103	215257	Il36g	interleukin 36G
5128.45	0.388365	0.0502759	1.05474e-15	3.32997e-14	ENSMUSG00000001440	16211	Kpnb1	karyopherin (importin) beta 1
197.104	-0.727502	0.0974621	1.1895e-15	3.74717e-14	ENSMUSG00000045318	11553	Adra2c	adrenergic receptor, alpha 2c
115.242	1.10986	0.152908	1.44691e-15	4.54811e-14	ENSMUSG00000022969	16155	Il10rb	interleukin 10 receptor, beta
637.065	-0.677377	0.0906459	1.4904e-15	4.67458e-14	ENSMUSG00000020601	217410	Trib2	tribbles pseudokinase 2
57.7407	18.2099	2.36075	1.78187e-15	5.5766e-14	ENSMUSG00000041225	75415	Arhgap12	Rho GTPase activating protein 12
669.873	0.750267	0.10155	1.83373e-15	5.72643e-14	ENSMUSG00000021555	78689	Naa35	N(alpha)-acetyltransferase 35, NatC auxiliary subunit
441.554	0.567726	0.0756115	1.95379e-15	6.08812e-14	ENSMUSG00000026198	74104	Abcb6	ATP-binding cassette, sub-family B (MDR/TAP), member 6
1309.96	0.592694	0.0791237	1.98798e-15	6.18125e-14	ENSMUSG00000026028	70827	Trak2	trafficking protein, kinesin binding 2
768.165	-0.616688	0.0826557	2.22198e-15	6.8939e-14	ENSMUSG00000045515	18993	Pou3f3	POU domain, class 3, transcription factor 3
132.82	1.0148	0.141118	2.26011e-15	6.9971e-14	ENSMUSG00000071648	19881	Rom1	rod outer segment membrane protein 1
273.889	0.549206	0.0734469	2.69719e-15	8.33229e-14	ENSMUSG00000033983	12812	Coil	coilin
6523.22	0.372636	0.0489367	2.81327e-15	8.67223e-14	ENSMUSG00000024501	22240	Dpysl3	dihydropyrimidinase-like 3
6937.97	0.335433	0.0438262	2.84161e-15	8.74083e-14	ENSMUSG00000011752	18648	Pgam1	phosphoglycerate mutase 1
73.6444	1.65365	0.223532	3.04439e-15	9.34458e-14	ENSMUSG00000031750	76527	Il34	interleukin 34
4789.34	-0.383243	0.0505137	3.2048e-15	9.81599e-14	ENSMUSG00000057880	268860	Abat	4-aminobutyrate aminotransferase
369.666	-0.678886	0.0922295	3.42114e-15	1.04563e-13	ENSMUSG00000028039	13638	Efna3	ephrin A3
21.0967	5.7619	0.757424	3.54024e-15	1.07973e-13	ENSMUSG00000024907	14419	Gal	galanin and GMAP prepropeptide
1212.36	-0.421405	0.0559754	3.79184e-15	1.15402e-13	ENSMUSG00000056091	20454	St3gal5	ST3 beta-galactoside alpha-2,3-sialyltransferase 5
1607.07	0.495159	0.0664145	4.19295e-15	1.2734e-13	ENSMUSG00000030256	79362	Bhlhe41	basic helix-loop-helix family, member e41
1834.67	0.660138	0.0899017	4.32261e-15	1.31001e-13	ENSMUSG00000034891	104069	Sncb	synuclein, beta
58.0771	3.13824	0.419783	4.70531e-15	1.42298e-13	ENSMUSG00000068196	12837	Col8a1	collagen, type VIII, alpha 1
15625.2	-0.593094	0.0804291	4.77213e-15	1.44016e-13	ENSMUSG00000029608	19894	Rph3a	rabphilin 3A
6826.27	-0.511925	0.0690551	5.27782e-15	1.58943e-13	ENSMUSG00000033595	213469	Lgi3	leucine-rich repeat LGI family, member 3
160.685	-0.815263	0.113439	5.37768e-15	1.61612e-13	ENSMUSG00000072437	332397	Nanos1	nanos C2HC-type zinc finger 1
270.686	1.22487	0.171805	5.44673e-15	1.63345e-13	ENSMUSG00000074886	26385	Grk6	G protein-coupled receptor kinase 6
581.233	0.698379	0.0959509	5.64151e-15	1.68834e-13	ENSMUSG00000030082	53421	Sec61a1	Sec61 alpha 1 subunit (S. cerevisiae)
44.9907	2.46903	0.339197	6.16548e-15	1.84131e-13	ENSMUSG00000022148	23880	Fyb	FYN binding protein
151.277	-0.768485	0.106645	6.27743e-15	1.87086e-13	ENSMUSG00000068122	11609	Agtr2	angiotensin II receptor, type 2
55.6118	2.91399	0.395143	6.39618e-15	1.9023e-13	ENSMUSG00000060429	20649	Sntb1	syntrophin, basic 1
348.342	-0.627632	0.085836	6.41181e-15	1.90301e-13	ENSMUSG00000096146	16514	Kcnj11	potassium inwardly rectifying channel, subfamily J, member 11
1324.84	0.636774	0.0873836	7.36275e-15	2.18074e-13	ENSMUSG00000024378	170459	Stard4	StAR-related lipid transfer (START) domain containing 4
361.289	0.730198	0.101255	7.64397e-15	2.25938e-13	ENSMUSG00000028944	108099	Prkag2	protein kinase, AMP-activated, gamma 2 non-catalytic subunit
507.963	-0.645856	0.0888199	7.88698e-15	2.32642e-13	ENSMUSG00000048483	238331	Zdhhc22	zinc finger, DHHC-type containing 22
1272.4	-0.441926	0.0596627	8.29742e-15	2.44247e-13	ENSMUSG00000032285	58233	Dnaja4	DnaJ heat shock protein family (Hsp40) member A4
3529.12	0.571614	0.0781994	8.53163e-15	2.50628e-13	ENSMUSG00000031391	16728	L1cam	L1 cell adhesion molecule
723.769	-0.593484	0.0815729	9.90061e-15	2.9025e-13	ENSMUSG00000020140	14160	Lgr5	leucine rich repeat containing G protein coupled receptor 5
2808.36	0.793916	0.111498	9.94716e-15	2.9102e-13	ENSMUSG00000004951	15507	Hspb1	heat shock protein 1
344.744	0.546674	0.0749386	1.07237e-14	3.13103e-13	ENSMUSG00000032776	244049	Mctp2	multiple C2 domains, transmembrane 2
11.7558	7.24217	0.99545	1.08361e-14	3.15741e-13	ENSMUSG00000027925	20764	Sprr2j-ps	small proline-rich protein 2J, pseudogene
1198.47	-0.439239	0.0595754	1.09217e-14	3.17212e-13	ENSMUSG00000027134	99010	Lpcat4	lysophosphatidylcholine acyltransferase 4
412.288	-0.437966	0.0593947	1.09307e-14	3.17212e-13	ENSMUSG00000107879	330427	9330102E08Rik	RIKEN cDNA 9330102E08 gene
742.245	-0.436053	0.0591328	1.10447e-14	3.19873e-13	ENSMUSG00000035849	268481	Krt222	keratin 222
21.961	5.01201	0.66678	1.1376e-14	3.28805e-13	ENSMUSG00000029338	71914	Antxr2	anthrax toxin receptor 2
599.927	-0.533479	0.0731423	1.15472e-14	3.33083e-13	ENSMUSG00000020638	22169	Cmpk2	cytidine monophosphate (UMP-CMP) kinase 2, mitochondrial
385.184	-0.496307	0.0678496	1.19762e-14	3.44766e-13	ENSMUSG00000054850	320237	Smim10l2a	small integral membrane protein 10 like 2A
2261.36	-0.404352	0.0547628	1.28245e-14	3.68448e-13	ENSMUSG00000003469	105653	Phyhip	phytanoyl-CoA hydroxylase interacting protein
205.511	-0.817949	0.115906	1.35106e-14	3.87386e-13	ENSMUSG00000049551	14371	Fzd9	frizzled class receptor 9
3917.01	0.431283	0.0587458	1.45543e-14	4.16478e-13	ENSMUSG00000019726	17101	Lyst	lysosomal trafficking regulator
153.864	0.863759	0.123275	1.47649e-14	4.21666e-13	ENSMUSG00000015247	66536	Nipsnap3b	nipsnap homolog 3B
579.965	0.748096	0.105295	1.4834e-14	4.22797e-13	ENSMUSG00000064215	52668	Ifi27	interferon, alpha-inducible protein 27
1202.53	-0.358839	0.0484645	1.57139e-14	4.46991e-13	ENSMUSG00000046699	245446	Slitrk4	SLIT and NTRK-like family, member 4
671.547	-0.415628	0.0566153	1.62451e-14	4.61187e-13	ENSMUSG00000018659	103711	Pnpo	pyridoxine 5'-phosphate oxidase
356.422	0.68467	0.0961288	1.89835e-14	5.37867e-13	ENSMUSG00000026623	226856	Lpgat1	lysophosphatidylglycerol acyltransferase 1
10.0071	6.96128	0.962919	2.0087e-14	5.68012e-13	ENSMUSG00000033219	381714	Gm9758	predicted gene 9758
2697.16	-0.44855	0.0616068	2.04036e-14	5.75832e-13	ENSMUSG00000047085	272381	Lrrc4b	leucine rich repeat containing 4B
1348.09	0.469324	0.0646991	2.19069e-14	6.17045e-13	ENSMUSG00000027698	320024	Nceh1	neutral cholesterol ester hydrolase 1
3635.65	-0.278771	0.0374319	2.31943e-14	6.52028e-13	ENSMUSG00000043991	19290	Pura	purine rich element binding protein A
1455.85	0.401642	0.0550505	2.52042e-14	7.07145e-13	ENSMUSG00000039431	54384	Mtmr7	myotubularin related protein 7
3510.26	0.611456	0.0858777	2.81993e-14	7.89636e-13	ENSMUSG00000024597	20496	Slc12a2	solute carrier family 12, member 2
17.6825	3.90223	0.530529	3.39497e-14	9.48809e-13	ENSMUSG00000027832	19288	Ptx3	pentraxin related gene
276.832	-0.739644	0.105758	3.44842e-14	9.61876e-13	ENSMUSG00000054034	331532	Tceal5	transcription elongation factor A (SII)-like 5
793.167	0.93848	0.13762	3.90523e-14	1.08718e-12	ENSMUSG00000036181	50708	H1f2	H1.2 linker histone, cluster member
2593.73	0.619273	0.087617	3.94701e-14	1.09669e-12	ENSMUSG00000020220	230895	Vps13d	vacuolar protein sorting 13D
3423.61	0.467552	0.0651675	3.96172e-14	1.09865e-12	ENSMUSG00000028370	18491	Pappa	pregnancy-associated plasma protein A
497.288	-0.544512	0.0765187	4.00884e-14	1.10958e-12	ENSMUSG00000037709	58909	Fam13a	family with sequence similarity 13, member A
470.877	-0.495629	0.069326	4.05737e-14	1.12085e-12	ENSMUSG00000084842	NA	NA	NA
3230	0.479631	0.0669763	4.06956e-14	1.12206e-12	ENSMUSG00000059316	26569	Slc27a4	solute carrier family 27 (fatty acid transporter), member 4
916.566	0.650868	0.0924761	4.16002e-14	1.1448e-12	ENSMUSG00000024855	107975	Pacs1	phosphofurin acidic cluster sorting protein 1
425.672	0.755096	0.108834	4.64375e-14	1.27548e-12	ENSMUSG00000096472	12581	Cdkn2d	cyclin dependent kinase inhibitor 2D
569.487	-0.524891	0.0739141	4.91743e-14	1.34807e-12	ENSMUSG00000034910	72135	Pygo1	pygopus 1
161.786	10.8139	1.58765	5.7917e-14	1.58472e-12	ENSMUSG00000025473	11501	Adam8	a disintegrin and metallopeptidase domain 8
135.188	0.856473	0.125658	5.88515e-14	1.60616e-12	ENSMUSG00000066189	54376	Cacng3	calcium channel, voltage-dependent, gamma subunit 3
146.471	0.964822	0.14298	5.89244e-14	1.60616e-12	ENSMUSG00000075334	67874	Rprm	reprimo, TP53 dependent G2 arrest mediator candidate
274.851	0.731638	0.10568	5.95044e-14	1.6189e-12	ENSMUSG00000022235	69574	Cmbl	carboxymethylenebutenolidase-like (Pseudomonas)
6391.72	-0.441601	0.0618631	6.06807e-14	1.64779e-12	ENSMUSG00000021194	12652	Chga	chromogranin A
4201.33	-0.374034	0.0519524	6.34821e-14	1.71736e-12	ENSMUSG00000048899	194237	Rimkla	ribosomal modification protein rimK-like family member A
9.38219	6.92443	0.978508	6.33943e-14	1.71736e-12	ENSMUSG00000094036	623998	Gm6465	predicted gene 6465
146.269	0.745753	0.10813	6.5633e-14	1.77221e-12	ENSMUSG00000026627	66950	Pacc1	proton activated chloride channel 1
522.667	-0.555913	0.0790193	6.77891e-14	1.827e-12	ENSMUSG00000079598	665180	Clec2l	C-type lectin domain family 2, member L
522.721	0.47084	0.0664047	7.15376e-14	1.92442e-12	ENSMUSG00000026317	26889	Cln8	CLN8 transmembrane ER and ERGIC protein
812.672	0.44241	0.0622677	7.68898e-14	2.06068e-12	ENSMUSG00000025337	66711	Sbds	SBDS ribosome maturation factor
1730.28	0.651698	0.093755	7.67585e-14	2.06068e-12	ENSMUSG00000029168	65254	Dpysl5	dihydropyrimidinase-like 5
3602.83	-0.418184	0.0586832	7.77267e-14	2.07923e-12	ENSMUSG00000041757	240753	Plekha6	pleckstrin homology domain containing, family A member 6
1460.55	-0.535059	0.076131	7.89948e-14	2.10922e-12	ENSMUSG00000074968	228432	Ano3	anoctamin 3
21.1517	7.35481	1.05416	8.49108e-14	2.26298e-12	ENSMUSG00000072621	237887	Slfn10-ps	schlafen 10, pseudogene
1270.98	-0.478035	0.067719	8.59436e-14	2.28626e-12	ENSMUSG00000053199	244867	Arhgap20	Rho GTPase activating protein 20
1650.26	-0.381809	0.0535562	9.97585e-14	2.64885e-12	ENSMUSG00000053166	104010	Cdh22	cadherin 22
2331.6	0.292399	0.0404929	1.10838e-13	2.93761e-12	ENSMUSG00000027351	114715	Spred1	sprouty protein with EVH-1 domain 1, related sequence
2674.44	-0.329842	0.0460132	1.15922e-13	3.06671e-12	ENSMUSG00000039270	230316	Megf9	multiple EGF-like-domains 9
483.418	0.604208	0.0873628	1.2461e-13	3.29049e-12	ENSMUSG00000022332	13992	Khdrbs3	KH domain containing, RNA binding, signal transduction associated 3
345.874	1.11794	0.168864	1.35058e-13	3.55984e-12	ENSMUSG00000019890	67405	Nts	neurotensin
18.6671	2.90667	0.41988	1.62323e-13	4.27063e-12	ENSMUSG00000020007	237313	Il20ra	interleukin 20 receptor, alpha
3107.2	0.280514	0.0391296	1.81285e-13	4.76081e-12	ENSMUSG00000022201	22763	Zfr	zinc finger RNA binding protein
844.23	0.43441	0.0622227	1.96413e-13	5.14866e-12	ENSMUSG00000089704	108148	Galnt2	polypeptide N-acetylgalactosaminyltransferase 2
1974.34	-0.349978	0.0495361	2.05771e-13	5.38416e-12	ENSMUSG00000031327	12212	Chic1	cysteine-rich hydrophobic domain 1
506.912	-0.584192	0.085187	2.06385e-13	5.3904e-12	ENSMUSG00000034255	544817	Arhgap27	Rho GTPase activating protein 27
157.071	1.69762	0.249878	2.15665e-13	5.62256e-12	ENSMUSG00000031885	12400	Cbfb	core binding factor beta
1283.19	0.404846	0.0578589	2.16408e-13	5.63171e-12	ENSMUSG00000033917	56209	Gde1	glycerophosphodiester phosphodiesterase 1
1861.19	0.312346	0.044008	2.2716e-13	5.90082e-12	ENSMUSG00000028879	100226	Stx12	syntaxin 12
307.31	0.545966	0.0794871	2.30643e-13	5.98049e-12	ENSMUSG00000001054	66089	Rmnd5b	required for meiotic nuclear division 5 homolog B
2027.96	-0.416662	0.0597469	2.34589e-13	6.07183e-12	ENSMUSG00000033720	94282	Sfxn5	sideroflexin 5
1230.5	-0.300291	0.0422513	2.36293e-13	6.10494e-12	ENSMUSG00000024269	66648	Tpgs2	tubulin polyglutamylase complex subunit 2
218.514	0.78226	0.11719	2.40416e-13	6.20032e-12	ENSMUSG00000036478	12226	Btg1	BTG anti-proliferation factor 1
38.9293	5.90156	0.840732	2.45517e-13	6.32053e-12	ENSMUSG00000001131	21857	Timp1	tissue inhibitor of metalloproteinase 1
1130.98	-0.458739	0.0662227	2.46691e-13	6.3394e-12	ENSMUSG00000032652	232430	Crebl2	cAMP responsive element binding protein-like 2
1457.82	-0.311664	0.0440408	2.65584e-13	6.81272e-12	ENSMUSG00000034997	15558	Htr2a	5-hydroxytryptamine (serotonin) receptor 2A
76.6587	1.37158	0.206073	2.67385e-13	6.84668e-12	ENSMUSG00000075270	241489	Pde11a	phosphodiesterase 11A
38.9023	2.8501	0.417094	2.70837e-13	6.92135e-12	ENSMUSG00000026433	226422	Rab29	RAB29, member RAS oncogene family
545.994	-0.445782	0.0643694	2.71265e-13	6.92135e-12	ENSMUSG00000030056	57905	Isy1	ISY1 splicing factor homolog
168.074	0.748576	0.112165	2.98256e-13	7.59654e-12	ENSMUSG00000036278	107227	Macrod1	mono-ADP ribosylhydrolase 1
758.045	0.479916	0.0697823	3.08475e-13	7.84291e-12	ENSMUSG00000024981	433256	Acsl5	acyl-CoA synthetase long-chain family member 5
3295.92	-0.407418	0.0587354	3.26558e-13	8.288e-12	ENSMUSG00000037972	20621	Snn	stannin
932.346	-0.45255	0.0656582	3.27335e-13	8.29306e-12	ENSMUSG00000030259	71323	Rassf8	Ras association (RalGDS/AF-6) domain family (N-terminal) member 8
133.983	0.809476	0.122714	3.45732e-13	8.74372e-12	ENSMUSG00000015027	50917	Galns	galactosamine (N-acetyl)-6-sulfate sulfatase
1711.59	0.2966	0.0420383	3.55283e-13	8.9695e-12	ENSMUSG00000030718	72590	Ppme1	protein phosphatase methylesterase 1
77.7164	1.23536	0.189299	3.63495e-13	9.1607e-12	ENSMUSG00000019256	11622	Ahr	aryl-hydrocarbon receptor
13.2922	6.56143	0.954296	3.75228e-13	9.43984e-12	ENSMUSG00000069355	NA	NA	NA
2301.38	0.311154	0.0443617	4.18458e-13	1.0509e-11	ENSMUSG00000029190	320661	D5Ertd579e	DNA segment, Chr 5, ERATO Doi 579, expressed
254.523	1.16669	0.18078	4.62988e-13	1.1607e-11	ENSMUSG00000038456	209773	Dennd2a	DENN/MADD domain containing 2A
524.86	0.38052	0.0553163	6.00902e-13	1.50383e-11	ENSMUSG00000044147	11845	Arf6	ADP-ribosylation factor 6
791.883	0.360291	0.0522793	6.47893e-13	1.6186e-11	ENSMUSG00000019849	19072	Prep	prolyl endopeptidase
639.097	0.873324	0.135516	6.61528e-13	1.6498e-11	ENSMUSG00000029999	21802	Tgfa	transforming growth factor alpha
229.532	-0.698243	0.105838	6.7223e-13	1.67358e-11	ENSMUSG00000003872	22342	Lin7b	lin-7 homolog B, crumbs cell polarity complex component
242.986	0.553251	0.0826369	7.36017e-13	1.82922e-11	ENSMUSG00000027560	76829	Dok5	docking protein 5
346.994	-0.524915	0.0781719	7.41788e-13	1.84038e-11	ENSMUSG00000031016	22390	Wee1	WEE 1 homolog 1 (S. pombe)
187.188	0.739586	0.113249	8.20574e-13	2.03233e-11	ENSMUSG00000028630	69181	Dyrk2	dual-specificity tyrosine-(Y)-phosphorylation regulated kinase 2
997.13	-0.432471	0.0638172	8.36386e-13	2.06793e-11	ENSMUSG00000029436	23948	Mmp17	matrix metallopeptidase 17
1151.93	-0.363673	0.053094	8.45838e-13	2.08771e-11	ENSMUSG00000006675	74443	P4htm	prolyl 4-hydroxylase, transmembrane (endoplasmic reticulum)
536.684	0.49106	0.0730697	8.57479e-13	2.11281e-11	ENSMUSG00000029640	22217	Usp12	ubiquitin specific peptidase 12
103.965	1.78678	0.271386	8.65867e-13	2.12982e-11	ENSMUSG00000019880	72780	Rspo3	R-spondin 3
3524.21	-0.396304	0.0582986	9.36614e-13	2.29991e-11	ENSMUSG00000059003	14811	Grin2a	glutamate receptor, ionotropic, NMDA2A (epsilon 1)
70.3519	1.48413	0.227647	9.44007e-13	2.31016e-11	ENSMUSG00000020423	12227	Btg2	BTG anti-proliferation factor 2
185.802	0.635104	0.09626	9.43698e-13	2.31016e-11	ENSMUSG00000048355	76219	Arxes1	adipocyte-related X-chromosome expressed sequence 1
1311.8	0.797716	0.124001	1.09317e-12	2.67063e-11	ENSMUSG00000034275	235086	Igsf9b	immunoglobulin superfamily, member 9B
20570.4	0.468079	0.0698761	1.13779e-12	2.77494e-11	ENSMUSG00000026473	14645	Glul	glutamate-ammonia ligase (glutamine synthetase)
2913.46	-0.285253	0.0413103	1.14997e-12	2.79989e-11	ENSMUSG00000021991	12294	Cacna2d3	calcium channel, voltage-dependent, alpha2/delta subunit 3
1663.28	0.453292	0.0675953	1.18655e-12	2.88406e-11	ENSMUSG00000040850	103554	Psme4	proteasome (prosome, macropain) activator subunit 4
666.668	0.523904	0.078922	1.25501e-12	3.04532e-11	ENSMUSG00000052298	72729	Cdc42se2	CDC42 small effector 2
15.4751	6.81751	1.02353	1.29014e-12	3.12527e-11	ENSMUSG00000028186	22262	Uox	urate oxidase
2934.18	0.30974	0.0451961	1.32127e-12	3.1953e-11	ENSMUSG00000026426	68724	Arl8a	ADP-ribosylation factor-like 8A
257.079	-0.51383	0.0774859	1.38736e-12	3.34949e-11	ENSMUSG00000040729	234915	Cep126	centrosomal protein 126
3810.84	0.254721	0.0368208	1.39197e-12	3.35496e-11	ENSMUSG00000024897	319924	Apba1	amyloid beta (A4) precursor protein binding, family A, member 1
1199.73	-0.377617	0.0559118	1.46848e-12	3.51579e-11	ENSMUSG00000019828	14816	Grm1	glutamate receptor, metabotropic 1
975.681	0.465683	0.0698832	1.46486e-12	3.51579e-11	ENSMUSG00000021171	52635	Esyt2	extended synaptotagmin-like protein 2
5512.93	-0.216776	0.0311589	1.46771e-12	3.51579e-11	ENSMUSG00000039145	227541	Camk1d	calcium/calmodulin-dependent protein kinase ID
5628.48	-0.411201	0.0612209	1.46753e-12	3.51579e-11	ENSMUSG00000041020	78283	Map7d2	MAP7 domain containing 2
896.201	-0.365245	0.0539737	1.48133e-12	3.54066e-11	ENSMUSG00000033578	67564	Tmem35a	transmembrane protein 35A
1554.83	0.441649	0.0662361	1.65977e-12	3.96055e-11	ENSMUSG00000038991	105245	Txndc5	thioredoxin domain containing 5
1430.39	-0.377425	0.0561119	1.77716e-12	4.23365e-11	ENSMUSG00000021704	382793	Mtx3	metaxin 3
30.612	6.56179	0.987737	1.85394e-12	4.40924e-11	ENSMUSG00000115018	NA	NA	NA
377.597	0.690402	0.107037	1.85705e-12	4.40935e-11	ENSMUSG00000022433	27373	Csnk1e	casein kinase 1, epsilon
297.263	1.02046	0.164354	1.92164e-12	4.55015e-11	ENSMUSG00000022044	56471	Stmn4	stathmin-like 4
3910.18	-0.477662	0.0722316	1.92269e-12	4.55015e-11	ENSMUSG00000052934	76454	Fbxo31	F-box protein 31
4589.94	0.320278	0.0472412	2.00392e-12	4.73458e-11	ENSMUSG00000034158	320184	Lrrc58	leucine rich repeat containing 58
291.436	-0.515741	0.0784736	2.04319e-12	4.81944e-11	ENSMUSG00000025175	63828	Fn3k	fructosamine 3 kinase
533.807	0.422375	0.0634708	2.06923e-12	4.87287e-11	ENSMUSG00000031189	14266	Aff2	AF4/FMR2 family, member 2
2429.16	-0.325395	0.048124	2.16825e-12	5.09769e-11	ENSMUSG00000021748	68263	Pdhb	pyruvate dehydrogenase (lipoamide) beta
5937.75	-0.279513	0.0410046	2.25306e-12	5.28844e-11	ENSMUSG00000028020	14658	Glrb	glycine receptor, beta subunit
488.409	-0.372475	0.0556832	2.38442e-12	5.58763e-11	ENSMUSG00000030079	56505	Ruvbl1	RuvB-like protein 1
2514.92	0.295571	0.0436704	2.71699e-12	6.3566e-11	ENSMUSG00000038916	67412	Soga3	SOGA family member 3
3146.37	0.311927	0.0462466	2.74727e-12	6.41701e-11	ENSMUSG00000052981	76980	Ube2ql1	ubiquitin-conjugating enzyme E2Q family-like 1
303.898	-0.684858	0.107226	2.88707e-12	6.7326e-11	ENSMUSG00000000296	21987	Tpd52l1	tumor protein D52-like 1
1565.3	0.296929	0.0439425	2.89506e-12	6.74029e-11	ENSMUSG00000004936	26395	Map2k1	mitogen-activated protein kinase kinase 1
368.57	0.506156	0.0776437	3.06765e-12	7.13054e-11	ENSMUSG00000038068	218215	Rnf144b	ring finger protein 144B
476.315	0.640361	0.0998625	3.11638e-12	7.23212e-11	ENSMUSG00000033377	114301	Palmd	palmdelphin
974.396	-0.533486	0.082157	3.14151e-12	7.27867e-11	ENSMUSG00000000253	66355	Gmpr	guanosine monophosphate reductase
994.544	0.445806	0.0680064	3.44832e-12	7.97668e-11	ENSMUSG00000018567	56486	Gabarap	gamma-aminobutyric acid receptor associated protein
41.8011	20.1276	3.02181	3.56546e-12	8.23437e-11	ENSMUSG00000031691	212999	Tnpo2	transportin 2 (importin 3, karyopherin beta 2b)
856.619	0.392873	0.0594768	3.58329e-12	8.26227e-11	ENSMUSG00000027293	98878	Ehd4	EH-domain containing 4
5125.08	0.535212	0.0827029	3.59962e-12	8.28663e-11	ENSMUSG00000013698	18611	Pea15a	proliferation and apoptosis adaptor protein 15A
11.6959	3.31708	0.505347	3.84891e-12	8.84633e-11	ENSMUSG00000038567	13081	Cyp24a1	cytochrome P450, family 24, subfamily a, polypeptide 1
2076	0.379622	0.0574435	3.8909e-12	8.92857e-11	ENSMUSG00000025130	18453	P4hb	prolyl 4-hydroxylase, beta polypeptide
12870.4	0.473839	0.0728654	4.10383e-12	9.40216e-11	ENSMUSG00000001525	22154	Tubb5	tubulin, beta 5 class I
360.351	-0.54567	0.0847221	4.17718e-12	9.55497e-11	ENSMUSG00000068615	14617	Gjd2	gap junction protein, delta 2
236.309	1.58976	0.251775	4.27103e-12	9.75411e-11	ENSMUSG00000046743	329628	Fat4	FAT atypical cadherin 4
4395.98	-0.3473	0.0523904	4.42731e-12	1.0095e-10	ENSMUSG00000022415	20972	Syngr1	synaptogyrin 1
66.47	3.67306	0.555263	4.58582e-12	1.04398e-10	ENSMUSG00000028583	14726	Pdpn	podoplanin
407.026	0.57095	0.0893458	5.10939e-12	1.16134e-10	ENSMUSG00000031538	18791	Plat	plasminogen activator, tissue
2107.86	-0.324676	0.0489402	5.21802e-12	1.18415e-10	ENSMUSG00000033900	213582	Map9	microtubule-associated protein 9
936.818	0.337039	0.0509824	5.47323e-12	1.24011e-10	ENSMUSG00000014867	20932	Surf4	surfeit gene 4
1533.44	-0.565991	0.0887276	5.63851e-12	1.27555e-10	ENSMUSG00000021448	20418	Shc3	src homology 2 domain-containing transforming protein C3
566.605	0.86274	0.141117	5.81997e-12	1.31453e-10	ENSMUSG00000034731	380921	Dgkh	diacylglycerol kinase, eta
417.688	-0.45511	0.0703826	5.87255e-12	1.32432e-10	ENSMUSG00000038982	17828	Bloc1s5	biogenesis of lysosomal organelles complex-1, subunit 5, muted
860.677	-0.422348	0.0651777	6.67648e-12	1.50325e-10	ENSMUSG00000002475	106861	Abhd3	abhydrolase domain containing 3
727.311	0.371676	0.0568572	6.70768e-12	1.50792e-10	ENSMUSG00000021039	66354	Snw1	SNW domain containing 1
1445.03	0.281553	0.0423202	6.81365e-12	1.52935e-10	ENSMUSG00000024091	30960	Vapa	vesicle-associated membrane protein, associated protein A
15.0416	4.48163	0.676367	6.95803e-12	1.55932e-10	ENSMUSG00000028262	80797	Clca3a2	chloride channel accessory 3A2
10739.9	-0.345102	0.052594	7.10819e-12	1.59049e-10	ENSMUSG00000046480	399548	Scn4b	sodium channel, type IV, beta
581.802	0.458942	0.0713781	7.28903e-12	1.62841e-10	ENSMUSG00000048915	13640	Efna5	ephrin A5
95.9494	1.57067	0.252941	7.84506e-12	1.74991e-10	ENSMUSG00000027276	16449	Jag1	jagged 1
47.8818	1.70393	0.273801	8.31227e-12	1.85125e-10	ENSMUSG00000033063	238680	Cntnap3	contactin associated protein-like 3
2792.13	0.412839	0.0639495	8.38653e-12	1.8649e-10	ENSMUSG00000027340	54338	Slc23a2	solute carrier family 23 (nucleobase transporters), member 2
1585.17	-0.270579	0.0407787	8.49805e-12	1.88678e-10	ENSMUSG00000026443	16980	Lrrn2	leucine rich repeat protein 2, neuronal
684.742	-0.417123	0.0647052	8.63956e-12	1.91524e-10	ENSMUSG00000028982	70556	Slc25a33	solute carrier family 25, member 33
929.801	0.366937	0.0564347	8.80529e-12	1.94875e-10	ENSMUSG00000032470	17532	Mras	muscle and microspikes RAS
12.9897	6.03973	0.932187	8.8179e-12	1.94875e-10	ENSMUSG00000049796	12918	Crh	corticotropin releasing hormone
2294.15	0.436476	0.0680237	9.19866e-12	2.02978e-10	ENSMUSG00000022043	66854	Trim35	tripartite motif-containing 35
5444.92	0.433812	0.0676114	9.38294e-12	2.06727e-10	ENSMUSG00000053024	21367	Cntn2	contactin 2
19.2075	2.70669	0.432505	9.43241e-12	2.07499e-10	ENSMUSG00000027994	66815	Mcub	mitochondrial calcium uniporter dominant negative beta subunit
2586.01	0.460892	0.0723118	1.03865e-11	2.28138e-10	ENSMUSG00000026103	14660	Gls	glutaminase
399.193	-0.677628	0.109564	1.08925e-11	2.38888e-10	ENSMUSG00000038760	22045	Trhr	thyrotropin releasing hormone receptor
278.467	0.998929	0.168599	1.16559e-11	2.55239e-10	ENSMUSG00000066441	17252	Rdh11	retinol dehydrogenase 11
647.014	-0.477714	0.0754475	1.23042e-11	2.69025e-10	ENSMUSG00000045875	11549	Adra1a	adrenergic receptor, alpha 1a
688.995	0.484469	0.0766003	1.2379e-11	2.7025e-10	ENSMUSG00000036995	230837	Asap3	ArfGAP with SH3 domain, ankyrin repeat and PH domain 3
3453.05	-0.52662	0.0838192	1.28236e-11	2.79531e-10	ENSMUSG00000070802	434128	Pnma8b	PNMA family member 8B
1680.32	-0.364147	0.0564988	1.31187e-11	2.85531e-10	ENSMUSG00000058441	406218	Panx2	pannexin 2
1233.4	-0.44977	0.0710041	1.43834e-11	3.12584e-10	ENSMUSG00000027889	109674	Ampd2	adenosine monophosphate deaminase 2
433.819	0.658879	0.107056	1.45882e-11	3.16554e-10	ENSMUSG00000046312	329828	Myorg	myogenesis regulating glycosidase (putative)
1150.45	0.335237	0.0518602	1.48139e-11	3.20967e-10	ENSMUSG00000029578	74781	Wipi2	WD repeat domain, phosphoinositide interacting 2
2218.53	0.257059	0.0391734	1.57553e-11	3.4085e-10	ENSMUSG00000029103	16976	Lrpap1	low density lipoprotein receptor-related protein associated protein 1
581.941	0.570032	0.0917319	1.58793e-11	3.43017e-10	ENSMUSG00000016534	16784	Lamp2	lysosomal-associated membrane protein 2
14.2366	7.36127	1.18934	1.6983e-11	3.66308e-10	ENSMUSG00000028602	21941	Tnfrsf8	tumor necrosis factor receptor superfamily, member 8
236.187	-0.701702	0.115276	1.74311e-11	3.75409e-10	ENSMUSG00000009216	109349	Fam163b	family with sequence similarity 163, member B
38.7802	1.67569	0.274868	1.7518e-11	3.76716e-10	ENSMUSG00000046719	104079	Nxph3	neurexophilin 3
1995.63	-0.262032	0.0400894	1.79059e-11	3.84482e-10	ENSMUSG00000021096	19042	Ppm1a	protein phosphatase 1A, magnesium dependent, alpha isoform
325.684	-0.514753	0.0825841	1.87683e-11	4.02398e-10	ENSMUSG00000021255	26380	Esrrb	estrogen related receptor, beta
374.812	0.608509	0.0989849	1.98568e-11	4.25102e-10	ENSMUSG00000063760	268291	Rnf217	ring finger protein 217
1712.86	-0.399998	0.063131	2.01707e-11	4.31179e-10	ENSMUSG00000024654	66514	Asrgl1	asparaginase like 1
472.774	-0.558479	0.0904018	2.11789e-11	4.52059e-10	ENSMUSG00000038236	15404	Hoxa7	homeobox A7
505.759	0.630916	0.103212	2.19389e-11	4.67585e-10	ENSMUSG00000044667	229791	Plppr4	phospholipid phosphatase related 4
61.4884	1.029	0.177051	2.2344e-11	4.75513e-10	ENSMUSG00000024957	16528	Kcnk4	potassium channel, subfamily K, member 4
1679.93	-0.352385	0.0552731	2.28963e-11	4.85827e-10	ENSMUSG00000022024	67955	Sugt1	SGT1, suppressor of G2 allele of SKP1 (S. cerevisiae)
25.6532	3.85666	0.603142	2.28864e-11	4.85827e-10	ENSMUSG00000067006	20724	Serpinb5	serine (or cysteine) peptidase inhibitor, clade B, member 5
847.481	0.461172	0.0737905	2.3054e-11	4.88453e-10	ENSMUSG00000095595	73385	Fam177a	family with sequence similarity 177, member A
993.29	-0.612999	0.100274	2.40136e-11	5.08035e-10	ENSMUSG00000026824	16519	Kcnj3	potassium inwardly-rectifying channel, subfamily J, member 3
1077.41	-0.402137	0.0637954	2.4482e-11	5.17183e-10	ENSMUSG00000040918	116914	Slc19a2	solute carrier family 19 (thiamine transporter), member 2
2467.69	0.435638	0.0696371	2.61924e-11	5.52501e-10	ENSMUSG00000005103	22388	Wdr1	WD repeat domain 1
2441.46	0.416413	0.066379	2.67887e-11	5.64252e-10	ENSMUSG00000026434	98415	Nucks1	nuclear casein kinase and cyclin-dependent kinase substrate 1
806.476	0.392202	0.0624755	3.11834e-11	6.55856e-10	ENSMUSG00000063904	75221	Dpp3	dipeptidylpeptidase 3
640.775	-0.511761	0.0832198	3.23444e-11	6.79281e-10	ENSMUSG00000116165	57028	Pdxp	pyridoxal (pyridoxine, vitamin B6) phosphatase
9.70765	6.31304	1.0117	3.25828e-11	6.83287e-10	ENSMUSG00000027908	71325	Tchhl1	trichohyalin-like 1
7230.26	0.434601	0.0698457	3.26714e-11	6.84147e-10	ENSMUSG00000028833	26562	Ncdn	neurochondrin
2353.76	0.214575	0.0329908	3.3576e-11	7.02066e-10	ENSMUSG00000056076	27979	Eif3b	eukaryotic translation initiation factor 3, subunit B
138.709	1.05778	0.184515	3.54819e-11	7.40839e-10	ENSMUSG00000027495	67017	Fam210b	family with sequence similarity 210, member B
437.649	0.63016	0.104437	3.58263e-11	7.46945e-10	ENSMUSG00000034761	399510	Map4k5	mitogen-activated protein kinase kinase kinase kinase 5
1659.12	0.383029	0.0611561	3.67785e-11	7.65687e-10	ENSMUSG00000042750	12069	Bex2	brain expressed X-linked 2
159.24	0.950085	0.165203	3.70538e-11	7.70301e-10	ENSMUSG00000004270	14792	Lpcat3	lysophosphatidylcholine acyltransferase 3
17.4653	4.80974	0.756184	3.80034e-11	7.889e-10	ENSMUSG00000024737	65221	Slc15a3	solute carrier family 15, member 3
2824.9	0.241035	0.0374378	4.14113e-11	8.58403e-10	ENSMUSG00000031709	71310	Tbc1d9	TBC1 domain family, member 9
292.608	0.481945	0.0785668	4.2198e-11	8.73451e-10	ENSMUSG00000029201	22235	Ugdh	UDP-glucose dehydrogenase
4943.98	-0.276163	0.0432604	4.3049e-11	8.89783e-10	ENSMUSG00000017466	21858	Timp2	tissue inhibitor of metalloproteinase 2
225.926	0.675928	0.113434	4.41454e-11	9.11132e-10	ENSMUSG00000085642	NA	NA	NA
3149.14	-0.338599	0.0538298	4.47852e-11	9.23012e-10	ENSMUSG00000065954	320165	Tacc1	transforming, acidic coiled-coil containing protein 1
385.747	0.424554	0.0688467	4.98304e-11	1.02552e-09	ENSMUSG00000019810	66848	Fuca2	fucosidase, alpha-L- 2, plasma
45746.4	-0.211298	0.0327689	4.9956e-11	1.02664e-09	ENSMUSG00000001175	12313	Calm1	calmodulin 1
267.054	0.989873	0.174161	5.02186e-11	1.03056e-09	ENSMUSG00000029491	18587	Pde6b	phosphodiesterase 6B, cGMP, rod receptor, beta polypeptide
591.984	-0.666361	0.112183	5.2161e-11	1.06889e-09	ENSMUSG00000024948	26412	Map4k2	mitogen-activated protein kinase kinase kinase kinase 2
364.21	0.528079	0.0873623	5.68313e-11	1.16294e-09	ENSMUSG00000028755	72269	Cda	cytidine deaminase
322.09	0.465529	0.0762889	5.69573e-11	1.16386e-09	ENSMUSG00000063296	320709	Tmem117	transmembrane protein 117
308.23	-0.388221	0.0628299	6.03761e-11	1.23196e-09	ENSMUSG00000028214	14579	Gem	GTP binding protein (gene overexpressed in skeletal muscle)
166.579	-0.66518	0.112593	6.36644e-11	1.29722e-09	ENSMUSG00000051817	20667	Sox12	SRY (sex determining region Y)-box 12
127.482	0.932543	0.164591	6.4605e-11	1.31452e-09	ENSMUSG00000025525	68117	Apool	apolipoprotein O-like
2023.54	0.440809	0.0722442	6.70358e-11	1.36205e-09	ENSMUSG00000056258	110862	Kcnq3	potassium voltage-gated channel, subfamily Q, member 3
66.0923	2.38329	0.405518	6.73964e-11	1.36599e-09	ENSMUSG00000031613	15446	Hpgd	hydroxyprostaglandin dehydrogenase 15 (NAD)
11.0596	5.38966	0.864611	6.74198e-11	1.36599e-09	ENSMUSG00000034783	246278	Cd207	CD207 antigen
226.706	0.549254	0.091586	6.80638e-11	1.37709e-09	ENSMUSG00000024135	78586	Srbd1	S1 RNA binding domain 1
31242	0.50479	0.0837405	7.15499e-11	1.44559e-09	ENSMUSG00000062380	22152	Tubb3	tubulin, beta 3 class III
2188.23	-0.276634	0.0438905	7.24672e-11	1.46207e-09	ENSMUSG00000046985	231225	Tapt1	transmembrane anterior posterior transformation 1
243.611	-0.682788	0.116449	7.52203e-11	1.51548e-09	ENSMUSG00000061758	67861	Akr1b10	aldo-keto reductase family 1, member B10 (aldose reductase)
6.79596	6.2485	1.0226	7.75754e-11	1.56074e-09	ENSMUSG00000091255	624245	Speer4e	spermatogenesis associated glutamate (E)-rich protein 4e
1289.12	-0.373612	0.060719	7.98091e-11	1.6012e-09	ENSMUSG00000001334	384061	Fndc5	fibronectin type III domain containing 5
519.495	0.540317	0.090372	7.97724e-11	1.6012e-09	ENSMUSG00000031974	56199	Abcb10	ATP-binding cassette, sub-family B (MDR/TAP), member 10
9.93862	6.88517	1.146	8.2022e-11	1.6433e-09	ENSMUSG00000095918	545728	Gm5861	predicted gene 5861
218.747	0.801442	0.139869	8.25218e-11	1.65101e-09	ENSMUSG00000020272	20868	Stk10	serine/threonine kinase 10
8938.81	-0.418036	0.0686247	8.35807e-11	1.66987e-09	ENSMUSG00000030246	16832	Ldhb	lactate dehydrogenase B
7.32383	6.45001	1.06272	8.38032e-11	1.67199e-09	ENSMUSG00000051081	226604	Gm4847	predicted gene 4847
23.6696	2.40572	0.412166	8.70295e-11	1.73263e-09	ENSMUSG00000020052	17172	Ascl1	achaete-scute family bHLH transcription factor 1
18.7954	3.0398	0.507731	8.70839e-11	1.73263e-09	ENSMUSG00000063060	20680	Sox7	SRY (sex determining region Y)-box 7
2360.52	0.472061	0.0783717	8.91893e-11	1.77207e-09	ENSMUSG00000020777	11430	Acox1	acyl-Coenzyme A oxidase 1, palmitoyl
6.32708	6.16532	1.01112	9.01327e-11	1.78834e-09	ENSMUSG00000096732	667961	Gm8897	predicted gene 8897
422.003	-0.413198	0.0679145	9.07182e-11	1.79747e-09	ENSMUSG00000028243	68053	Ubxn2b	UBX domain protein 2B
1690.1	-0.527151	0.0883331	9.1522e-11	1.8109e-09	ENSMUSG00000032908	433323	Sgpp2	sphingosine-1-phosphate phosphatase 2
1418.12	0.271492	0.0432953	9.343e-11	1.84611e-09	ENSMUSG00000031311	53610	Nono	non-POU-domain-containing, octamer binding protein
11.8138	4.6381	0.746225	9.57521e-11	1.88939e-09	ENSMUSG00000000182	64654	Fgf23	fibroblast growth factor 23
512.235	0.383091	0.0627018	9.71705e-11	1.91475e-09	ENSMUSG00000042305	57439	Tmem183a	transmembrane protein 183A
1037.31	0.369373	0.0602894	9.75831e-11	1.92025e-09	ENSMUSG00000038612	17210	Mcl1	myeloid cell leukemia sequence 1
1291.09	-0.321998	0.0520175	9.83108e-11	1.93192e-09	ENSMUSG00000038576	96935	Susd4	sushi domain containing 4
897.893	0.452174	0.0753525	1.16175e-10	2.27985e-09	ENSMUSG00000055485	320706	Soga1	suppressor of glucose, autophagy associated 1
35.503	3.42179	0.566431	1.17381e-10	2.30037e-09	ENSMUSG00000027555	71934	Car13	carbonic anhydrase 13
22944.7	-0.185377	0.0292165	1.19553e-10	2.33976e-09	ENSMUSG00000026452	20980	Syt2	synaptotagmin II
1144.45	-0.405308	0.0670577	1.23216e-10	2.40815e-09	ENSMUSG00000062937	66902	Mtap	methylthioadenosine phosphorylase
107.043	1.61888	0.281894	1.25723e-10	2.45383e-09	ENSMUSG00000002897	16172	Il17ra	interleukin 17 receptor A
3474.33	0.290351	0.0469435	1.35531e-10	2.64165e-09	ENSMUSG00000031647	71306	Mfap3l	microfibrillar-associated protein 3-like
460.201	0.674295	0.11704	1.44027e-10	2.80345e-09	ENSMUSG00000028145	75778	Them4	thioesterase superfamily member 4
1622.59	-0.672108	0.116707	1.47761e-10	2.87224e-09	ENSMUSG00000034570	170835	Inpp5j	inositol polyphosphate 5-phosphatase J
410.263	-0.440217	0.0737864	1.55517e-10	3.01892e-09	ENSMUSG00000036291	74385	Ap5m1	adaptor-related protein complex 5, mu 1 subunit
318.567	0.478774	0.0808112	1.56604e-10	3.03593e-09	ENSMUSG00000003273	12348	Car11	carbonic anhydrase 11
2604.86	0.236158	0.0378636	1.59348e-10	3.08495e-09	ENSMUSG00000031924	66427	Cyb5b	cytochrome b5 type B
796.434	0.343756	0.0565432	1.62686e-10	3.14534e-09	ENSMUSG00000039178	67249	Tbc1d19	TBC1 domain family, member 19
31.831	1.92097	0.336113	1.63167e-10	3.1504e-09	ENSMUSG00000028179	107869	Cth	cystathionase (cystathionine gamma-lyase)
7544.39	-0.289594	0.0470399	1.63696e-10	3.15637e-09	ENSMUSG00000023011	72393	Faim2	Fas apoptotic inhibitory molecule 2
8500.36	0.321472	0.0526536	1.68522e-10	3.24507e-09	ENSMUSG00000023456	21991	Tpi1	triosephosphate isomerase 1
1698.39	0.30419	0.0496268	1.69437e-10	3.25831e-09	ENSMUSG00000091896	56550	Ube2d2a	ubiquitin-conjugating enzyme E2D 2A
548.554	0.492413	0.0835388	1.73362e-10	3.32933e-09	ENSMUSG00000062627	320713	Mysm1	myb-like, SWIRM and MPN domains 1
888.802	-0.357605	0.0591875	1.82604e-10	3.50215e-09	ENSMUSG00000025040	72018	Fundc1	FUN14 domain containing 1
2371.1	-0.31853	0.0523085	1.91197e-10	3.66207e-09	ENSMUSG00000025318	57340	Jph3	junctophilin 3
1403.05	0.358516	0.0594803	1.9814e-10	3.78999e-09	ENSMUSG00000040433	245007	Zbtb38	zinc finger and BTB domain containing 38
1249.66	-0.395832	0.0662178	1.9933e-10	3.80767e-09	ENSMUSG00000024030	11307	Abcg1	ATP binding cassette subfamily G member 1
1003.42	0.268741	0.0436965	2.06258e-10	3.93479e-09	ENSMUSG00000031511	54126	Arhgef7	Rho guanine nucleotide exchange factor (GEF7)
4205.29	-0.220108	0.0354022	2.07279e-10	3.94903e-09	ENSMUSG00000033352	26398	Map2k4	mitogen-activated protein kinase kinase 4
239.812	1.22171	0.223336	2.0889e-10	3.97445e-09	ENSMUSG00000042712	22381	Tceal9	transcription elongation factor A like 9
48.4207	1.516	0.269825	2.09729e-10	3.98514e-09	ENSMUSG00000006546	12958	Cryba2	crystallin, beta A2
443.852	-0.380203	0.0634967	2.11826e-10	4.01965e-09	ENSMUSG00000022758	18440	P2rx6	purinergic receptor P2X, ligand-gated ion channel, 6
803.406	-0.564988	0.097528	2.13695e-10	4.04977e-09	ENSMUSG00000033998	16525	Kcnk1	potassium channel, subfamily K, member 1
964.783	-0.313947	0.0516767	2.17783e-10	4.1218e-09	ENSMUSG00000025421	76987	Hdhd2	haloacid dehalogenase-like hydrolase domain containing 2
1200.1	0.734442	0.130475	2.18526e-10	4.13043e-09	ENSMUSG00000032562	14678	Gnai2	guanine nucleotide binding protein (G protein), alpha inhibiting 2
324.054	0.639818	0.111867	2.21965e-10	4.18992e-09	ENSMUSG00000113691	NA	NA	NA
1439.09	-0.522154	0.0898783	2.43527e-10	4.59091e-09	ENSMUSG00000038967	18604	Pdk2	pyruvate dehydrogenase kinase, isoenzyme 2
2092.49	0.30001	0.0493822	2.4726e-10	4.65516e-09	ENSMUSG00000033350	54371	Chst2	carbohydrate sulfotransferase 2
44.4352	1.77469	0.314746	2.48678e-10	4.67573e-09	ENSMUSG00000058624	14544	Gda	guanine deaminase
1752.4	-0.266816	0.043621	2.59131e-10	4.86591e-09	ENSMUSG00000031749	20444	St3gal2	ST3 beta-galactoside alpha-2,3-sialyltransferase 2
1038.37	-0.263901	0.0431566	2.69032e-10	5.04523e-09	ENSMUSG00000035297	26891	Cops4	COP9 signalosome subunit 4
668.063	-0.326802	0.0543384	2.83227e-10	5.30451e-09	ENSMUSG00000031129	331004	Slc9a9	solute carrier family 9 (sodium/hydrogen exchanger), member 9
1429.38	0.544483	0.0944921	2.8557e-10	5.34143e-09	ENSMUSG00000031604	66234	Msmo1	methylsterol monoxygenase 1
2760.09	0.214667	0.0348161	3.00691e-10	5.61694e-09	ENSMUSG00000030084	18844	Plxna1	plexin A1
329.425	0.880604	0.162278	3.09859e-10	5.78069e-09	ENSMUSG00000051379	71436	Flrt3	fibronectin leucine rich transmembrane protein 3
341.096	0.487351	0.0840027	3.11242e-10	5.79895e-09	ENSMUSG00000025287	56360	Acot9	acyl-CoA thioesterase 9
10.5295	4.09016	0.682729	3.1561e-10	5.87272e-09	ENSMUSG00000109032	666190	Gm7972	predicted gene 7972
1162.01	0.282131	0.0465649	3.22822e-10	5.99915e-09	ENSMUSG00000010517	14084	Faf1	Fas-associated factor 1
510.857	-0.487108	0.0840581	3.24359e-10	6.01991e-09	ENSMUSG00000044365	319478	Cxxc4	CXXC finger 4
1237.8	0.405418	0.0689359	3.33743e-10	6.1861e-09	ENSMUSG00000018293	18643	Pfn1	profilin 1
189.38	0.680096	0.121241	3.34354e-10	6.18944e-09	ENSMUSG00000051950	381694	B3glct	beta-3-glucosyltransferase
1213.29	-0.254901	0.0418383	3.35975e-10	6.21143e-09	ENSMUSG00000037104	56468	Socs5	suppressor of cytokine signaling 5
10.9539	6.63438	1.142	3.40419e-10	6.2855e-09	ENSMUSG00000046223	18793	Plaur	plasminogen activator, urokinase receptor
8120.16	0.356235	0.0600045	3.52375e-10	6.49791e-09	ENSMUSG00000030161	57436	Gabarapl1	gamma-aminobutyric acid (GABA) A receptor-associated protein-like 1
399.199	-0.450841	0.0775549	3.64764e-10	6.71773e-09	ENSMUSG00000040746	70510	Rnf167	ring finger protein 167
4748.09	-0.331632	0.0556178	3.72322e-10	6.84814e-09	ENSMUSG00000030209	14812	Grin2b	glutamate receptor, ionotropic, NMDA2B (epsilon 2)
200.987	1.22295	0.228312	3.90837e-10	7.17951e-09	ENSMUSG00000022912	19128	Pros1	protein S (alpha)
350.238	0.647291	0.115347	3.96136e-10	7.26756e-09	ENSMUSG00000052310	30791	Slc39a1	solute carrier family 39 (zinc transporter), member 1
4623.15	-0.277413	0.046004	4.02798e-10	7.37095e-09	ENSMUSG00000025757	18415	Hspa4l	heat shock protein 4 like
1886.43	-0.398105	0.0679462	4.02583e-10	7.37095e-09	ENSMUSG00000061080	268890	Lsamp	limbic system-associated membrane protein
513.514	0.451597	0.0779254	4.03825e-10	7.38034e-09	ENSMUSG00000008475	67771	Arpc5	actin related protein 2/3 complex, subunit 5
5.43135	5.94062	1.01066	4.05959e-10	7.40992e-09	ENSMUSG00000024987	13082	Cyp26a1	cytochrome P450, family 26, subfamily a, polypeptide 1
4311.56	0.190779	0.0310505	4.15004e-10	7.5654e-09	ENSMUSG00000035847	15931	Ids	iduronate 2-sulfatase
525.075	-0.420533	0.0722215	4.23939e-10	7.71226e-09	ENSMUSG00000029153	433904	Ociad2	OCIA domain containing 2
314.622	0.512556	0.0895372	4.24134e-10	7.71226e-09	ENSMUSG00000051098	72852	Mblac2	metallo-beta-lactamase domain containing 2
1749.48	-0.282905	0.0470891	4.39521e-10	7.98195e-09	ENSMUSG00000044792	69046	Isca1	iron-sulfur cluster assembly 1
2069.61	-0.472848	0.0821549	4.46251e-10	8.09394e-09	ENSMUSG00000031561	23965	Tenm3	teneurin transmembrane protein 3
1044.77	-0.349382	0.0591737	4.55028e-10	8.24272e-09	ENSMUSG00000051339	243219	2900026A02Rik	RIKEN cDNA 2900026A02 gene
183.19	0.695821	0.125641	4.57335e-10	8.27408e-09	ENSMUSG00000031934	55991	Panx1	pannexin 1
5453.48	-0.344417	0.0582852	4.61252e-10	8.33444e-09	ENSMUSG00000046442	320472	Ppm1e	protein phosphatase 1E (PP2C domain containing)
443.212	-0.561398	0.0991459	4.67331e-10	8.43367e-09	ENSMUSG00000066900	71954	Suds3	suppressor of defective silencing 3 homolog (S. cerevisiae)
1030.83	-0.677282	0.122062	4.79085e-10	8.63495e-09	ENSMUSG00000031239	16431	Itm2a	integral membrane protein 2A
2472.03	0.312908	0.0526568	4.9857e-10	8.97489e-09	ENSMUSG00000029447	12466	Cct6a	chaperonin containing Tcp1, subunit 6a (zeta)
5437.53	0.238518	0.0394306	5.09618e-10	9.16228e-09	ENSMUSG00000025228	54130	Actr1a	ARP1 actin-related protein 1A, centractin alpha
1397.77	-0.265911	0.0442634	5.1516e-10	9.25034e-09	ENSMUSG00000062580	21854	Timm17a	translocase of inner mitochondrial membrane 17a
1087.31	-0.276729	0.046367	5.93543e-10	1.06445e-08	ENSMUSG00000041658	245670	Rragb	Ras-related GTP binding B
5607.26	-0.361536	0.0618978	6.02024e-10	1.07831e-08	ENSMUSG00000032356	19417	Rasgrf1	RAS protein-specific guanine nucleotide-releasing factor 1
5.93631	6.09622	1.05341	6.12996e-10	1.0966e-08	ENSMUSG00000028713	13120	Cyp4b1	cytochrome P450, family 4, subfamily b, polypeptide 1
7587.98	0.362766	0.0622009	6.2776e-10	1.12161e-08	ENSMUSG00000030000	11519	Add2	adducin 2 (beta)
680.875	0.686976	0.125134	6.29906e-10	1.12405e-08	ENSMUSG00000053436	26416	Mapk14	mitogen-activated protein kinase 14
5406.58	0.349788	0.0598035	6.33411e-10	1.1289e-08	ENSMUSG00000032589	12217	Bsn	bassoon
3531.93	-0.51105	0.0905256	6.77844e-10	1.2066e-08	ENSMUSG00000054459	26950	Vsnl1	visinin-like 1
309.459	1.01274	0.194172	6.81265e-10	1.21119e-08	ENSMUSG00000025485	101489	Ric8a	RIC8 guanine nucleotide exchange factor A
1766.22	-0.303016	0.0513537	7.03665e-10	1.24946e-08	ENSMUSG00000058997	219189	Vwa8	von Willebrand factor A domain containing 8
30.5492	2.40801	0.440321	7.07639e-10	1.25497e-08	ENSMUSG00000006344	23887	Ggt5	gamma-glutamyltransferase 5
2976.66	-0.263602	0.0442467	7.14664e-10	1.26586e-08	ENSMUSG00000032046	76192	Abhd12	abhydrolase domain containing 12
446.78	-0.49991	0.088538	7.1874e-10	1.27151e-08	ENSMUSG00000048304	386750	Slitrk3	SLIT and NTRK-like family, member 3
152.783	-0.748504	0.138618	7.25709e-10	1.28226e-08	ENSMUSG00000039257	58188	Vstm2b	V-set and transmembrane domain containing 2B
529.256	0.3468	0.0594874	7.29021e-10	1.28653e-08	ENSMUSG00000027217	241556	Tspan18	tetraspanin 18
136.426	-0.643962	0.116946	7.30279e-10	1.28717e-08	ENSMUSG00000030319	67088	Cand2	cullin-associated and neddylation-dissociated 2 (putative)
484.016	0.432324	0.0756419	7.37028e-10	1.29748e-08	ENSMUSG00000006442	20810	Srm	spermidine synthase
5683.6	-0.244956	0.0409838	7.51284e-10	1.32095e-08	ENSMUSG00000027288	20402	Zfp106	zinc finger protein 106
165.532	-0.579071	0.104322	8.05599e-10	1.41472e-08	ENSMUSG00000059674	239096	Cdh24	cadherin-like 24
6414.65	0.434694	0.0763291	8.17101e-10	1.43317e-08	ENSMUSG00000072825	217882	Cep170b	centrosomal protein 170B
3525.79	0.433092	0.076075	8.36089e-10	1.46468e-08	ENSMUSG00000041073	192950	Nacad	NAC alpha domain containing
1505.83	0.847175	0.160829	8.66175e-10	1.51554e-08	ENSMUSG00000034714	117160	Ttyh2	tweety family member 2
1538.64	0.514087	0.0919519	9.11866e-10	1.59355e-08	ENSMUSG00000050708	14325	Ftl1	ferritin light polypeptide 1
236.357	0.516398	0.0924887	9.393e-10	1.6395e-08	ENSMUSG00000070462	80889	Tlnrd1	talin rod domain containing 1
215.666	0.665454	0.122474	9.72879e-10	1.69605e-08	ENSMUSG00000113416	NA	NA	NA
473.473	-0.378645	0.0661636	1.05472e-09	1.83649e-08	ENSMUSG00002076083	231003	Klhl17	kelch-like 17
9.22149	4.33603	0.748023	1.07626e-09	1.87172e-08	ENSMUSG00000027261	15112	Hao1	hydroxyacid oxidase 1, liver
1295.81	-0.345161	0.0598589	1.08001e-09	1.87598e-08	ENSMUSG00000041231	79560	Ublcp1	ubiquitin-like domain containing CTD phosphatase 1
461.345	-0.477085	0.0853027	1.12056e-09	1.94303e-08	ENSMUSG00000040258	104080	Nxph4	neurexophilin 4
306.738	0.765514	0.144393	1.12131e-09	1.94303e-08	ENSMUSG00000042246	209760	Tmc7	transmembrane channel-like gene family 7
818.401	0.393362	0.0691992	1.176e-09	2.03532e-08	ENSMUSG00000042410	228061	Agps	alkylglycerone phosphate synthase
1127.9	-0.311098	0.0536296	1.19014e-09	2.05733e-08	ENSMUSG00000035232	236900	Pdk3	pyruvate dehydrogenase kinase, isoenzyme 3
55.5779	1.08509	0.212629	1.21483e-09	2.09747e-08	ENSMUSG00000091549	NA	NA	NA
1265.01	0.386527	0.0679812	1.23108e-09	2.12298e-08	ENSMUSG00000018583	27041	G3bp1	GTPase activating protein (SH3 domain) binding protein 1
495.907	-0.556406	0.101285	1.25531e-09	2.16218e-08	ENSMUSG00000032348	14860	Gsta4	glutathione S-transferase, alpha 4
17.0288	5.83816	1.02544	1.27437e-09	2.19238e-08	ENSMUSG00000021678	14063	F2rl1	coagulation factor II (thrombin) receptor-like 1
37.5857	1.77074	0.332589	1.30087e-09	2.23528e-08	ENSMUSG00000073530	23850	Pappa2	pappalysin 2
764.72	0.621214	0.114536	1.30852e-09	2.24575e-08	ENSMUSG00000030554	233335	Synm	synemin, intermediate filament protein
476.945	-0.685763	0.128106	1.34598e-09	2.30728e-08	ENSMUSG00000074575	241794	Kcng1	potassium voltage-gated channel, subfamily G, member 1
1325.12	0.340519	0.0594084	1.37799e-09	2.35934e-08	ENSMUSG00000071658	14704	Gng3	guanine nucleotide binding protein (G protein), gamma 3
22600.5	0.484946	0.0874684	1.41003e-09	2.41131e-08	ENSMUSG00000029580	11461	Actb	actin, beta
1639.81	0.269073	0.0460993	1.41205e-09	2.4119e-08	ENSMUSG00000018736	83431	Ndel1	nudE neurodevelopment protein 1 like 1
7.92356	5.45937	0.955877	1.45563e-09	2.48338e-08	ENSMUSG00000099762	100861702	Gm21149	predicted gene, 21149
447.551	-0.427227	0.0762331	1.45802e-09	2.48451e-08	ENSMUSG00000038354	213121	Ankrd35	ankyrin repeat domain 35
507.707	0.569683	0.104461	1.46167e-09	2.48778e-08	ENSMUSG00000035547	12337	Capn5	calpain 5
5369.84	0.355407	0.0623644	1.47135e-09	2.50129e-08	ENSMUSG00000037071	20249	Scd1	stearoyl-Coenzyme A desaturase 1
3494.77	0.372846	0.06572	1.47834e-09	2.51021e-08	ENSMUSG00000036667	77574	Tcaf1	TRPM8 channel-associated factor 1
174.482	0.82791	0.159769	1.5086e-09	2.55856e-08	ENSMUSG00000019923	52696	Zwint	ZW10 interactor
2605.56	0.215252	0.0364618	1.51631e-09	2.56861e-08	ENSMUSG00000041313	11987	Slc7a1	solute carrier family 7 (cationic amino acid transporter, y+ system), member 1
2182.95	-0.4462	0.0800829	1.54206e-09	2.60915e-08	ENSMUSG00000034981	231440	Parm1	prostate androgen-regulated mucin-like protein 1
58.4261	1.35039	0.26174	1.54906e-09	2.61791e-08	ENSMUSG00000022887	17174	Masp1	mannan-binding lectin serine peptidase 1
456.728	-0.73787	0.139999	1.55426e-09	2.6236e-08	ENSMUSG00000009292	28240	Trpm2	transient receptor potential cation channel, subfamily M, member 2
510.342	0.531315	0.0970135	1.58082e-09	2.66532e-08	ENSMUSG00000035572	242418	Dcaf10	DDB1 and CUL4 associated factor 10
901.368	0.844082	0.163751	1.60684e-09	2.70601e-08	ENSMUSG00000026163	77629	Sphkap	SPHK1 interactor, AKAP domain containing
1067.11	0.336996	0.059032	1.62831e-09	2.73896e-08	ENSMUSG00000041781	51786	Cpsf2	cleavage and polyadenylation specific factor 2
326.127	0.577538	0.106445	1.63565e-09	2.74809e-08	ENSMUSG00000008435	108841	Rdh13	retinol dehydrogenase 13 (all-trans and 9-cis)
2058.58	0.366293	0.0647203	1.6891e-09	2.83458e-08	ENSMUSG00000031320	20102	Rps4x	ribosomal protein S4, X-linked
2104.2	-0.21568	0.0366733	1.73009e-09	2.89997e-08	ENSMUSG00000034152	211446	Exoc3	exocyst complex component 3
9.86166	6.71553	1.21955	1.79648e-09	3.00774e-08	ENSMUSG00000025172	56642	Ankrd2	ankyrin repeat domain 2 (stretch responsive muscle)
12473.2	-0.43664	0.078647	1.84312e-09	3.08225e-08	ENSMUSG00000023945	63993	Slc5a7	solute carrier family 5 (choline transporter), member 7
496.614	0.484492	0.0881535	1.85822e-09	3.10387e-08	ENSMUSG00000046722	57912	Cdc42se1	CDC42 small effector 1
509.384	-0.538525	0.0990314	1.88678e-09	3.14791e-08	ENSMUSG00000033610	75735	Pank1	pantothenate kinase 1
2228.03	0.388039	0.0692725	1.98296e-09	3.30455e-08	ENSMUSG00000001729	11651	Akt1	thymoma viral proto-oncogene 1
266.448	0.435438	0.0785971	1.98741e-09	3.30812e-08	ENSMUSG00000039234	69608	Sec24d	Sec24 related gene family, member D (S. cerevisiae)
5830.87	-0.440025	0.0795665	2.03684e-09	3.38649e-08	ENSMUSG00000066129	76484	Kndc1	kinase non-catalytic C-lobe domain (KIND) containing 1
356.395	-0.644649	0.121223	2.05207e-09	3.40786e-08	ENSMUSG00000021846	93834	Peli2	pellino 2
348.984	0.796904	0.154671	2.08064e-09	3.45131e-08	ENSMUSG00000020857	18103	Nme2	NME/NM23 nucleoside diphosphate kinase 2
3501.37	0.32271	0.056756	2.1127e-09	3.50045e-08	ENSMUSG00000018401	170749	Mtmr4	myotubularin related protein 4
503.702	-0.528045	0.0973296	2.14435e-09	3.5488e-08	ENSMUSG00000021373	67252	Cap2	CAP, adenylate cyclase-associated protein, 2 (yeast)
386.924	0.690929	0.131361	2.15993e-09	3.57048e-08	ENSMUSG00000045664	104252	Cdc42ep2	CDC42 effector protein (Rho GTPase binding) 2
341.084	0.429561	0.0777014	2.21413e-09	3.65587e-08	ENSMUSG00000065979	223978	Cpped1	calcineurin-like phosphoesterase domain containing 1
4102.7	0.260793	0.0451841	2.24449e-09	3.70173e-08	ENSMUSG00000042506	216825	Usp22	ubiquitin specific peptidase 22
1136.78	0.524301	0.0967369	2.25718e-09	3.71839e-08	ENSMUSG00000021986	72125	Amer2	APC membrane recruitment 2
826.069	-0.295623	0.0517272	2.27882e-09	3.74974e-08	ENSMUSG00000021671	67463	Poc5	POC5 centriolar protein
2138.27	0.358942	0.0639511	2.35716e-09	3.87422e-08	ENSMUSG00000033713	71375	Foxn3	forkhead box N3
1724.46	-0.580576	0.108429	2.38168e-09	3.91004e-08	ENSMUSG00000026610	26381	Esrrg	estrogen-related receptor gamma
276.772	0.524228	0.0969375	2.4131e-09	3.9571e-08	ENSMUSG00000031642	59009	Sh3rf1	SH3 domain containing ring finger 1
1921.45	-0.378597	0.0679193	2.50293e-09	4.09972e-08	ENSMUSG00000024780	67072	Cdc37l1	cell division cycle 37-like 1
46.7126	-1.11431	0.224572	2.58303e-09	4.2261e-08	ENSMUSG00000022176	140743	Rem2	rad and gem related GTP binding protein 2
5388.35	0.383266	0.0690111	2.71188e-09	4.43187e-08	ENSMUSG00000028465	21894	Tln1	talin 1
21.1259	1.94813	0.375784	2.72244e-09	4.44408e-08	ENSMUSG00000039962	258799	Olfr906	olfactory receptor 906
844.53	0.613132	0.115751	2.72902e-09	4.44976e-08	ENSMUSG00000042444	235461	Mindy2	MINDY lysine 48 deubiquitinase 2
3701.88	-0.345358	0.0616449	2.81087e-09	4.57802e-08	ENSMUSG00000021476	56541	Habp4	hyaluronic acid binding protein 4
568.445	-0.698195	0.134239	2.82774e-09	4.60028e-08	ENSMUSG00000008734	64297	Gprc5b	G protein-coupled receptor, family C, group 5, member B
994.653	-0.328811	0.0584931	2.91272e-09	4.73317e-08	ENSMUSG00000034621	237943	Gpatch8	G patch domain containing 8
2352.71	-0.314388	0.0558131	3.1018e-09	5.02905e-08	ENSMUSG00000038552	64339	Fndc4	fibronectin type III domain containing 4
2797.88	-0.496672	0.0921232	3.09935e-09	5.02905e-08	ENSMUSG00000038738	243961	Shank1	SH3 and multiple ankyrin repeat domains 1
546.581	7.73011	1.47333	3.13641e-09	5.07942e-08	ENSMUSG00000024066	22436	Xdh	xanthine dehydrogenase
222.29	0.625482	0.119062	3.22366e-09	5.21484e-08	ENSMUSG00000048216	64450	Gpr85	G protein-coupled receptor 85
183.4	0.81037	0.160423	3.27106e-09	5.28557e-08	ENSMUSG00000116815	NA	NA	NA
777.164	-0.291842	0.0515743	3.28109e-09	5.29583e-08	ENSMUSG00000050052	72148	Tdrp	testis development related protein
197.879	0.589805	0.111635	3.33247e-09	5.37273e-08	ENSMUSG00000032602	57279	Slc25a20	solute carrier family 25 (mitochondrial carnitine/acylcarnitine translocase), member 20
1006.66	0.43102	0.0791006	3.43055e-09	5.52465e-08	ENSMUSG00000019590	13056	Cyb561	cytochrome b-561
711.904	-0.429056	0.0789367	3.75304e-09	6.03722e-08	ENSMUSG00000040420	320865	Cdh18	cadherin 18
661.623	0.448497	0.0829149	3.80309e-09	6.11089e-08	ENSMUSG00000009621	22325	Vav2	vav 2 oncogene
2045.4	0.21892	0.0381198	3.84289e-09	6.16795e-08	ENSMUSG00000000088	12858	Cox5a	cytochrome c oxidase subunit 5A
456.702	0.498899	0.0932809	3.8776e-09	6.21671e-08	ENSMUSG00000035941	108837	Ibtk	inhibitor of Bruton agammaglobulinemia tyrosine kinase
1027.51	-0.409457	0.0751254	3.98053e-09	6.37461e-08	ENSMUSG00000046532	11835	Ar	androgen receptor
587.822	-0.436933	0.0806976	3.9941e-09	6.38922e-08	ENSMUSG00000026399	13136	Cd55	CD55 molecule, decay accelerating factor for complement
243.03	1.81491	0.35581	4.0001e-09	6.3917e-08	ENSMUSG00000036905	12260	C1qb	complement component 1, q subcomponent, beta polypeptide
906.777	-0.558958	0.105925	4.07743e-09	6.50802e-08	ENSMUSG00000062115	19377	Rai1	retinoic acid induced 1
314.197	0.736531	0.144767	4.0975e-09	6.53281e-08	ENSMUSG00000034265	224454	Zdhhc14	zinc finger, DHHC domain containing 14
2488.43	-0.259832	0.0458331	4.14231e-09	6.59692e-08	ENSMUSG00000029330	74596	Cds1	CDP-diacylglycerol synthase 1
153.658	1.08018	0.222162	4.21115e-09	6.69913e-08	ENSMUSG00000039208	210029	Metrnl	meteorin, glial cell differentiation regulator-like
801.41	0.384888	0.0703161	4.21691e-09	6.70088e-08	ENSMUSG00000028961	110208	Pgd	phosphogluconate dehydrogenase
643.953	-0.41093	0.0756087	4.29135e-09	6.81162e-08	ENSMUSG00000040447	216892	Spns2	spinster homolog 2
392.443	-0.356796	0.06475	4.31518e-09	6.8419e-08	ENSMUSG00000049086	107771	Bmyc	brain expressed myelocytomatosis oncogene
780.651	-0.317073	0.0569529	4.41856e-09	6.99809e-08	ENSMUSG00000005982	74763	Naa60	N(alpha)-acetyltransferase 60, NatF catalytic subunit
4114.69	-0.305342	0.0546903	4.48875e-09	7.10142e-08	ENSMUSG00000001211	28169	Agpat3	1-acylglycerol-3-phosphate O-acyltransferase 3
318.764	0.588381	0.112615	4.59802e-09	7.26629e-08	ENSMUSG00000102742	93723	Pcdhga11	protocadherin gamma subfamily A, 11
157627	-0.43049	0.0798619	4.77506e-09	7.53778e-08	ENSMUSG00000022055	18039	Nefl	neurofilament, light polypeptide
72.9365	7.14721	1.3607	4.91347e-09	7.74776e-08	ENSMUSG00000004347	18575	Pde1c	phosphodiesterase 1C
1220.11	0.358181	0.065364	5.07102e-09	7.98742e-08	ENSMUSG00000024997	11757	Prdx3	peroxiredoxin 3
998.402	0.364988	0.0669324	5.56763e-09	8.76003e-08	ENSMUSG00000023075	68050	Akirin1	akirin 1
1554.39	0.307042	0.0554022	5.59159e-09	8.7881e-08	ENSMUSG00000041889	77552	Shisa4	shisa family member 4
8230.31	-0.405468	0.0751737	5.62578e-09	8.83217e-08	ENSMUSG00000064329	20265	Scn1a	sodium channel, voltage-gated, type I, alpha
101.269	-0.699174	0.137969	5.63842e-09	8.84235e-08	ENSMUSG00000035431	20605	Sstr1	somatostatin receptor 1
42.9709	-21.3666	3.97649	5.7093e-09	8.94374e-08	ENSMUSG00000021975	210925	Ints9	integrator complex subunit 9
2301.32	-0.39828	0.0737972	5.83735e-09	9.13437e-08	ENSMUSG00000048385	170729	Scrt1	scratch family zinc finger 1
303.281	-0.49273	0.093321	5.84416e-09	9.13508e-08	ENSMUSG00000086784	664994	Isoc2a	isochorismatase domain containing 2a
393.13	1.45956	0.295966	6.07995e-09	9.49331e-08	ENSMUSG00000040339	329739	Fam102b	family with sequence similarity 102, member B
413.38	0.332512	0.0606139	6.12371e-09	9.55126e-08	ENSMUSG00000029594	74111	Rbm19	RNA binding motif protein 19
14.3068	18.2878	3.43097	6.18123e-09	9.63051e-08	ENSMUSG00000027522	228960	Stx16	syntaxin 16
89.2268	0.929028	0.192527	6.22516e-09	9.68846e-08	ENSMUSG00000031574	20845	Star	steroidogenic acute regulatory protein
216.937	-0.594896	0.11529	6.25383e-09	9.72253e-08	ENSMUSG00000053395	81905	Cacng8	calcium channel, voltage-dependent, gamma subunit 8
20.1407	4.14086	0.760291	6.49195e-09	1.00818e-07	ENSMUSG00000037169	18109	Mycn	v-myc avian myelocytomatosis viral related oncogene, neuroblastoma derived
1315.38	0.332427	0.0607537	6.63253e-09	1.0289e-07	ENSMUSG00000006941	68969	Eif1b	eukaryotic translation initiation factor 1B
349.876	1.24888	0.259472	6.73995e-09	1.04444e-07	ENSMUSG00000047496	320311	Rnf152	ring finger protein 152
274.21	-0.484946	0.0921994	6.8357e-09	1.05813e-07	ENSMUSG00000034460	20474	Six4	sine oculis-related homeobox 4
134.142	0.899811	0.186911	7.26468e-09	1.12333e-07	ENSMUSG00000078591	628779	Hs3st4	heparan sulfate (glucosamine) 3-O-sulfotransferase 4
360.82	0.515492	0.0988919	7.3433e-09	1.13426e-07	ENSMUSG00000039879	380629	Heca	hdc homolog, cell cycle regulator
59.4737	0.981736	0.205998	7.37314e-09	1.13643e-07	ENSMUSG00000015879	58227	Fam184b	family with sequence similarity 184, member B
896.569	-0.390498	0.0727757	7.37211e-09	1.13643e-07	ENSMUSG00000031841	12554	Cdh13	cadherin 13
3800.5	-0.326885	0.0598655	7.42946e-09	1.14388e-07	ENSMUSG00000029804	73998	Herc3	hect domain and RLD 3
462.715	0.5955	0.116186	7.47312e-09	1.14937e-07	ENSMUSG00000001260	14405	Gabrg1	gamma-aminobutyric acid (GABA) A receptor, subunit gamma 1
104.67	-21.1907	3.98584	7.5046e-09	1.15298e-07	ENSMUSG00000028546	15572	Elavl4	ELAV like RNA binding protein 4
1509.8	-0.29733	0.0540357	7.65459e-09	1.17477e-07	ENSMUSG00000050967	263764	Creg2	cellular repressor of E1A-stimulated genes 2
33.4534	6.8661	1.31797	7.80445e-09	1.19649e-07	ENSMUSG00000064080	14115	Fbln2	fibulin 2
140.976	-0.562571	0.109247	7.8846e-09	1.20749e-07	ENSMUSG00000030303	330450	Far2	fatty acyl CoA reductase 2
1250.37	-0.40989	0.0770063	8.05386e-09	1.2321e-07	ENSMUSG00000050272	13508	Dscam	DS cell adhesion molecule
26697.1	-0.166589	0.0293458	8.35371e-09	1.27661e-07	ENSMUSG00000026764	16574	Kif5c	kinesin family member 5C
530.344	0.402883	0.0756695	8.42339e-09	1.28589e-07	ENSMUSG00000039108	241846	Lsm14b	LSM family member 14B
308.135	0.74567	0.151091	8.45254e-09	1.28897e-07	ENSMUSG00000001985	14807	Grik3	glutamate receptor, ionotropic, kainate 3
511.378	0.606964	0.119272	8.48679e-09	1.29282e-07	ENSMUSG00000036790	245450	Slitrk2	SLIT and NTRK-like family, member 2
76.3129	1.00282	0.212062	8.55249e-09	1.30145e-07	ENSMUSG00000035184	629059	Fam124a	family with sequence similarity 124, member A
463.681	-0.497065	0.0956623	8.94622e-09	1.35992e-07	ENSMUSG00000090799	546611	Klhl33	kelch-like 33
112.027	-0.709509	0.142929	9.00092e-09	1.36679e-07	ENSMUSG00000071073	224813	Lrrc73	leucine rich repeat containing 73
1148.67	0.273809	0.0497028	9.16106e-09	1.38964e-07	ENSMUSG00000002341	13004	Ncan	neurocan
48.4532	-20.2812	3.84478	9.2027e-09	1.39301e-07	ENSMUSG00000028890	17764	Mtf1	metal response element binding transcription factor 1
203.635	0.612135	0.120788	9.19794e-09	1.39301e-07	ENSMUSG00000035725	19108	Prkx	protein kinase, X-linked
1402.66	0.453265	0.0865005	9.31017e-09	1.4078e-07	ENSMUSG00000048490	268903	Nrip1	nuclear receptor interacting protein 1
1952.31	0.226829	0.0406643	9.38787e-09	1.41805e-07	ENSMUSG00000039512	224648	Uhrf1bp1	UHRF1 (ICBP90) binding protein 1
156.734	0.758784	0.155014	9.59952e-09	1.4485e-07	ENSMUSG00000025227	75146	Mfsd13a	major facilitator superfamily domain containing 13a
1927.16	-0.275719	0.0502446	1.01626e-08	1.53185e-07	ENSMUSG00000024429	14670	Gnl1	guanine nucleotide binding protein-like 1
872.101	0.348108	0.0648222	1.02029e-08	1.53632e-07	ENSMUSG00000028719	66588	Cmpk1	cytidine monophosphate (UMP-CMP) kinase 1
3874.83	-0.450657	0.0862434	1.02512e-08	1.54197e-07	ENSMUSG00000023328	11423	Ache	acetylcholinesterase
239.214	0.716042	0.145336	1.04533e-08	1.57073e-07	ENSMUSG00000024085	17158	Man2a1	mannosidase 2, alpha 1
451.398	1.33671	0.281076	1.07052e-08	1.6069e-07	ENSMUSG00000052512	78286	Nav2	neuron navigator 2
595.634	0.28251	0.0517019	1.08902e-08	1.63296e-07	ENSMUSG00000031791	74166	Tmem38a	transmembrane protein 38A
889.902	-0.262908	0.0478508	1.09952e-08	1.64698e-07	ENSMUSG00000031242	67028	2610002M06Rik	RIKEN cDNA 2610002M06 gene
1373.47	0.213782	0.0383878	1.10275e-08	1.6501e-07	ENSMUSG00000027879	20333	Sec22b	SEC22 homolog B, vesicle trafficking protein
910.541	-0.427915	0.0816764	1.11389e-08	1.66504e-07	ENSMUSG00000022003	67554	Slc25a30	solute carrier family 25, member 30
1194.05	0.369237	0.0694659	1.15498e-08	1.72467e-07	ENSMUSG00000075703	28042	Selenoi	selenoprotein I
167.185	0.638641	0.127923	1.1684e-08	1.7429e-07	ENSMUSG00000055660	76781	Mettl4	methyltransferase like 4
1955.8	0.429058	0.0821137	1.19148e-08	1.77548e-07	ENSMUSG00000027309	228602	Dnaaf9	dynein axonemal assembly factor 9
197.347	-0.592325	0.117675	1.22403e-08	1.82209e-07	ENSMUSG00000021265	214663	Slc25a29	solute carrier family 25 (mitochondrial carrier, palmitoylcarnitine transporter), member 29
2159.73	0.258102	0.047084	1.23339e-08	1.83223e-07	ENSMUSG00000007815	11848	Rhoa	ras homolog family member A
3775.67	-0.288281	0.0530644	1.23279e-08	1.83223e-07	ENSMUSG00000019194	20266	Scn1b	sodium channel, voltage-gated, type I, beta
984.403	0.317965	0.0590984	1.25926e-08	1.86872e-07	ENSMUSG00000059713	53902	Rcan3	regulator of calcineurin 3
1151.61	0.342933	0.0643113	1.31491e-08	1.94929e-07	ENSMUSG00000002718	110750	Cse1l	chromosome segregation 1-like (S. cerevisiae)
495.501	-0.505576	0.0989304	1.33854e-08	1.98227e-07	ENSMUSG00000022479	22337	Vdr	vitamin D (1,25-dihydroxyvitamin D3) receptor
142.02	-0.567584	0.112567	1.34212e-08	1.98554e-07	ENSMUSG00000042626	20416	Shc1	src homology 2 domain-containing transforming protein C1
81.826	1.32395	0.281636	1.34397e-08	1.98622e-07	ENSMUSG00000046768	80837	Rhoj	ras homolog family member J
467.711	-0.426772	0.0820494	1.37628e-08	2.03188e-07	ENSMUSG00000038323	73467	1700066M21Rik	RIKEN cDNA 1700066M21 gene
36.8404	18.3907	3.56511	1.3778e-08	2.03204e-07	ENSMUSG00000068397	100503563	Gm10240	ribosomal protein L21 pseudogene
18.5662	1.71968	0.35643	1.38148e-08	2.03538e-07	ENSMUSG00000029641	68895	Rasl11a	RAS-like, family 11, member A
438.307	0.466197	0.0905564	1.39888e-08	2.05891e-07	ENSMUSG00000050989	74777	Selenon	selenoprotein N
1072.46	-0.330844	0.0619573	1.40315e-08	2.06308e-07	ENSMUSG00000035354	78610	Uvrag	UV radiation resistance associated gene
6.80908	5.11588	0.963364	1.43177e-08	2.103e-07	ENSMUSG00000054204	100294583	Alkal2	ALK and LTK ligand 2
92.7114	1.2426	0.267756	1.51061e-08	2.21654e-07	ENSMUSG00000021843	16709	Ktn1	kinectin 1
45.9727	1.55307	0.325962	1.53027e-08	2.2431e-07	ENSMUSG00000038387	20130	Rras	related RAS viral (r-ras) oncogene
1763.09	-0.403609	0.0774319	1.53866e-08	2.25309e-07	ENSMUSG00000019699	23797	Akt3	thymoma viral proto-oncogene 3
4342.9	0.300807	0.0560678	1.60143e-08	2.34262e-07	ENSMUSG00000019087	54411	Atp6ap1	ATPase, H+ transporting, lysosomal accessory protein 1
2664.05	0.579036	0.115992	1.62968e-08	2.38151e-07	ENSMUSG00000030662	70572	Ipo5	importin 5
1935.79	0.327238	0.0615395	1.63853e-08	2.39201e-07	ENSMUSG00000025326	22215	Ube3a	ubiquitin protein ligase E3A
49.4453	1.11238	0.242684	1.66788e-08	2.43239e-07	ENSMUSG00000074796	269356	Slc4a11	solute carrier family 4, sodium bicarbonate transporter-like, member 11
463.182	-0.406656	0.0783175	1.67458e-08	2.43969e-07	ENSMUSG00000095139	18992	Pou3f2	POU domain, class 3, transcription factor 2
1119.98	-0.417012	0.0805393	1.67677e-08	2.4404e-07	ENSMUSG00000068099	76505	Smim45	small integral membrane protein 45
2435.64	-0.181181	0.0327161	1.6872e-08	2.4531e-07	ENSMUSG00000027706	69276	Sec62	SEC62 homolog (S. cerevisiae)
3025.74	0.2492	0.0458765	1.76771e-08	2.56756e-07	ENSMUSG00000015599	106763	Ttbk1	tau tubulin kinase 1
810.652	0.549323	0.109786	1.81244e-08	2.62987e-07	ENSMUSG00000032253	83946	Phip	pleckstrin homology domain interacting protein
549.208	0.318577	0.0599727	1.82499e-08	2.64541e-07	ENSMUSG00000028223	67460	Decr1	2,4-dienoyl CoA reductase 1, mitochondrial
762.838	-0.399863	0.0771466	1.85297e-08	2.68325e-07	ENSMUSG00000062184	50786	Hs6st2	heparan sulfate 6-O-sulfotransferase 2
164.002	0.563366	0.113119	1.88753e-08	2.73055e-07	ENSMUSG00000018405	217038	Mrm1	mitochondrial rRNA methyltransferase 1
796.051	-0.344259	0.0654375	1.9222e-08	2.77561e-07	ENSMUSG00000018415	66771	Gid4	GID complex subunit 4, VID24 homolog
1907.51	-0.177703	0.0321967	1.92254e-08	2.77561e-07	ENSMUSG00000029684	73178	Wasl	WASP like actin nucleation promoting factor
1179.49	0.291053	0.054527	2.03615e-08	2.93667e-07	ENSMUSG00000002017	72722	Fam98a	family with sequence similarity 98, member A
126.52	0.636782	0.130484	2.07481e-08	2.98943e-07	ENSMUSG00000020988	217666	L2hgdh	L-2-hydroxyglutarate dehydrogenase
275.974	0.563437	0.113708	2.14443e-08	3.08665e-07	ENSMUSG00000024927	19697	Rela	v-rel reticuloendotheliosis viral oncogene homolog A (avian)
353.85	-0.510594	0.101835	2.14728e-08	3.08766e-07	ENSMUSG00000016552	239554	Foxred2	FAD-dependent oxidoreductase domain containing 2
2402.34	-0.192437	0.0351292	2.1864e-08	3.14076e-07	ENSMUSG00000074781	93765	Ube2n	ubiquitin-conjugating enzyme E2N
99.0916	5.69731	1.10118	2.20147e-08	3.15925e-07	ENSMUSG00000045629	225608	Sh3tc2	SH3 domain and tetratricopeptide repeats 2
432.568	0.378218	0.0729934	2.21747e-08	3.17903e-07	ENSMUSG00000036835	66340	Psenen	presenilin enhancer gamma secretase subunit
2848.4	0.270523	0.0505362	2.26e-08	3.23678e-07	ENSMUSG00000070493	14004	Chchd2	coiled-coil-helix-coiled-coil-helix domain containing 2
601.439	0.462842	0.09158	2.34668e-08	3.35757e-07	ENSMUSG00000038910	224860	Plcl2	phospholipase C-like 2
1869.51	-0.315044	0.0598179	2.41344e-08	3.44966e-07	ENSMUSG00000038807	380711	Rap1gap2	RAP1 GTPase activating protein 2
672.014	0.567379	0.11519	2.436e-08	3.47844e-07	ENSMUSG00000066551	15289	Hmgb1	high mobility group box 1
2525.64	-0.430162	0.0845563	2.46324e-08	3.51385e-07	ENSMUSG00000050556	16500	Kcnb1	potassium voltage gated channel, Shab-related subfamily, member 1
94.9394	0.952597	0.210331	2.4705e-08	3.52071e-07	ENSMUSG00000053930	380702	Shisa6	shisa family member 6
153.588	6.46496	1.28167	2.47361e-08	3.52165e-07	ENSMUSG00000047045	209497	Tmem164	transmembrane protein 164
1198.33	-0.207352	0.0381716	2.52246e-08	3.58573e-07	ENSMUSG00000025246	21372	Tbl1x	transducin (beta)-like 1 X-linked
894.56	-0.795878	0.170971	2.52361e-08	3.58573e-07	ENSMUSG00000031376	320707	Atp2b3	ATPase, Ca++ transporting, plasma membrane 3
783.355	-0.446309	0.0882053	2.5409e-08	3.60673e-07	ENSMUSG00000044676	234725	Zfp612	zinc finger protein 612
999.165	-0.311971	0.0593346	2.6045e-08	3.69335e-07	ENSMUSG00000047344	236285	Lancl3	LanC lantibiotic synthetase component C-like 3 (bacterial)
121.133	0.781001	0.167538	2.64625e-08	3.74885e-07	ENSMUSG00000032501	211770	Trib1	tribbles pseudokinase 1
279.581	-0.485649	0.0973095	2.81481e-08	3.98373e-07	ENSMUSG00000024038	78330	Ndufv3	NADH:ubiquinone oxidoreductase core subunit V3
3791.95	-0.2396	0.0447235	2.91518e-08	4.12171e-07	ENSMUSG00000026223	64294	Itm2c	integral membrane protein 2C
2857.24	-0.290442	0.0551191	2.97847e-08	4.20705e-07	ENSMUSG00000002413	109880	Braf	Braf transforming gene
161.493	0.666456	0.139767	3.03458e-08	4.2821e-07	ENSMUSG00000034333	223773	Zbed4	zinc finger, BED type containing 4
28.3489	17.9331	3.61981	3.08613e-08	4.35056e-07	ENSMUSG00000014418	246694	Hps5	HPS5, biogenesis of lysosomal organelles complex 2 subunit 2
108.453	-0.544645	0.111151	3.14952e-08	4.43558e-07	ENSMUSG00000074345	244882	Tnfaip8l3	tumor necrosis factor, alpha-induced protein 8-like 3
1242.76	-0.259555	0.0488812	3.16678e-08	4.45552e-07	ENSMUSG00000034157	217732	Cipc	CLOCK interacting protein, circadian
1326.01	0.3327	0.0641688	3.20831e-08	4.50953e-07	ENSMUSG00000021929	16648	Kpna3	karyopherin (importin) alpha 3
692.32	0.365738	0.0712927	3.23229e-08	4.53879e-07	ENSMUSG00000031584	14782	Gsr	glutathione reductase
6751.83	0.250356	0.047114	3.36722e-08	4.72364e-07	ENSMUSG00000056201	12631	Cfl1	cofilin 1, non-muscle
207.37	-8.62206	1.85232	3.46261e-08	4.85272e-07	ENSMUSG00000032396	213550	Dis3l	DIS3 like exosome 3'-5' exoribonuclease
387.123	0.42836	0.0853105	3.52429e-08	4.93435e-07	ENSMUSG00000030309	232560	Caprin2	caprin family member 2
389.447	-0.343607	0.0667764	3.59345e-08	5.02628e-07	ENSMUSG00000118668	56613	Rps6ka4	ribosomal protein S6 kinase, polypeptide 4
1265.16	-0.371558	0.0728634	3.62407e-08	5.06418e-07	ENSMUSG00000061578	333050	Ksr2	kinase suppressor of ras 2
1065.9	-0.319645	0.0616851	3.66099e-08	5.10088e-07	ENSMUSG00000000915	29816	Hip1r	huntingtin interacting protein 1 related
1134.48	0.369092	0.07235	3.65769e-08	5.10088e-07	ENSMUSG00000039801	73692	Cplane1	ciliogenesis and planar polarity effector 1
164.277	0.586689	0.121662	3.66004e-08	5.10088e-07	ENSMUSG00000045838	214239	Ccdc9b	coiled-coil domain containing 9B
2252.82	0.653509	0.137809	3.70956e-08	5.16354e-07	ENSMUSG00000052040	50794	Klf13	Kruppel-like factor 13
650.722	0.387884	0.076512	3.71526e-08	5.16648e-07	ENSMUSG00000027613	16418	Eif6	eukaryotic translation initiation factor 6
187.195	0.605528	0.12639	3.84043e-08	5.33538e-07	ENSMUSG00000022103	14586	Gfra2	glial cell line derived neurotrophic factor family receptor alpha 2
586.598	-0.32166	0.0622365	3.86506e-08	5.3644e-07	ENSMUSG00000002799	16450	Jag2	jagged 2
588.713	-0.258288	0.0489757	3.90203e-08	5.41049e-07	ENSMUSG00000022466	71919	Rpap3	RNA polymerase II associated protein 3
235.34	0.88451	0.19805	4.09549e-08	5.67326e-07	ENSMUSG00000032540	67469	Abhd5	abhydrolase domain containing 5
15175.8	-0.204159	0.0381998	4.20874e-08	5.82452e-07	ENSMUSG00000039485	72480	Tspyl4	TSPY-like 4
5259.66	0.283433	0.0544502	4.49115e-08	6.20937e-07	ENSMUSG00000023915	94185	Tnfrsf21	tumor necrosis factor receptor superfamily, member 21
1469.18	0.299002	0.0577722	4.56883e-08	6.3107e-07	ENSMUSG00000037049	20597	Smpd1	sphingomyelin phosphodiesterase 1, acid lysosomal
59.2747	1.36728	0.30769	4.61122e-08	6.36312e-07	ENSMUSG00000027583	72147	Zbtb46	zinc finger and BTB domain containing 46
675.763	0.414572	0.083175	4.71669e-08	6.50242e-07	ENSMUSG00000038774	77987	Ascc3	activating signal cointegrator 1 complex subunit 3
1323.55	-0.271871	0.0521331	4.74275e-08	6.53208e-07	ENSMUSG00000025192	93685	Entpd7	ectonucleoside triphosphate diphosphohydrolase 7
414.849	0.831451	0.185628	4.82527e-08	6.63937e-07	ENSMUSG00000036002	230088	Fam214b	family with sequence similarity 214, member B
237.239	-0.587661	0.123352	4.84256e-08	6.65678e-07	ENSMUSG00000056423	224065	Uts2b	urotensin 2B
145.906	0.541601	0.112448	4.86405e-08	6.67993e-07	ENSMUSG00000014303	83396	Glis2	GLIS family zinc finger 2
573.998	0.548301	0.114145	4.98901e-08	6.845e-07	ENSMUSG00000059173	18573	Pde1a	phosphodiesterase 1A, calmodulin-dependent
670.505	0.498579	0.102567	5.02526e-08	6.88815e-07	ENSMUSG00000017715	74451	Pgs1	phosphatidylglycerophosphate synthase 1
1025.63	0.319535	0.062469	5.23027e-08	7.16232e-07	ENSMUSG00000009907	20479	Vps4b	vacuolar protein sorting 4B
593.916	0.422187	0.0852865	5.31452e-08	7.27077e-07	ENSMUSG00000018796	14081	Acsl1	acyl-CoA synthetase long-chain family member 1
1915.36	-0.28981	0.0561804	5.44264e-08	7.43897e-07	ENSMUSG00000015944	80909	Castor2	cytosolic arginine sensor for mTORC1 subunit 2
466.499	0.474039	0.0974221	5.72047e-08	7.81127e-07	ENSMUSG00000027540	19246	Ptpn1	protein tyrosine phosphatase, non-receptor type 1
5151.23	0.369096	0.0736421	5.84315e-08	7.97122e-07	ENSMUSG00000069601	11735	Ank3	ankyrin 3, epithelial
192.862	-0.540543	0.113158	5.94742e-08	8.10576e-07	ENSMUSG00000000295	69692	Hddc2	HD domain containing 2
29.2322	1.0521	0.244317	6.007e-08	8.1792e-07	ENSMUSG00000050108	270757	Bpifc	BPI fold containing family C
14.6705	2.71071	0.585728	6.07701e-08	8.26669e-07	ENSMUSG00000027997	12368	Casp6	caspase 6
5103.79	0.207381	0.0393417	6.12832e-08	8.32861e-07	ENSMUSG00000021794	14661	Glud1	glutamate dehydrogenase 1
1975.01	0.220009	0.0419187	6.25797e-08	8.49676e-07	ENSMUSG00000040389	99512	Wdr47	WD repeat domain 47
425.608	0.470311	0.0970185	6.42002e-08	8.70855e-07	ENSMUSG00000020818	69900	Mfsd11	major facilitator superfamily domain containing 11
661.956	-0.330195	0.0652841	6.42862e-08	8.71199e-07	ENSMUSG00000018377	22344	Vezf1	vascular endothelial zinc finger 1
1309.94	-0.236849	0.0454154	6.48823e-08	8.78448e-07	ENSMUSG00000030201	16974	Lrp6	low density lipoprotein receptor-related protein 6
1151.52	0.630313	0.135626	6.66146e-08	9.01053e-07	ENSMUSG00000028962	20535	Slc4a2	solute carrier family 4 (anion exchanger), member 2
502.503	0.314189	0.0618865	6.71532e-08	9.07484e-07	ENSMUSG00000028291	433693	Akirin2	akirin 2
1739.22	-0.330704	0.0655072	6.72463e-08	9.07888e-07	ENSMUSG00000049265	16527	Kcnk3	potassium channel, subfamily K, member 3
241.523	-0.455554	0.0937838	6.73654e-08	9.08643e-07	ENSMUSG00000025736	72106	Jmjd8	jumonji domain containing 8
139.81	0.59782	0.127685	6.79786e-08	9.15773e-07	ENSMUSG00000009076	67178	Zmat5	zinc finger, matrin type 5
121.407	1.12486	0.262896	6.80215e-08	9.15773e-07	ENSMUSG00000041134	224405	Cyyr1	cysteine and tyrosine-rich protein 1
26.3536	3.29518	0.690785	6.8687e-08	9.23866e-07	ENSMUSG00000030787	114332	Lyve1	lymphatic vessel endothelial hyaluronan receptor 1
570.776	0.437583	0.0897096	6.88203e-08	9.24792e-07	ENSMUSG00000050132	237868	Sarm1	sterile alpha and HEAT/Armadillo motif containing 1
49.1356	-0.85876	0.196458	7.00196e-08	9.4003e-07	ENSMUSG00000091733	666420	Gm8094	predicted gene 8094
44.8562	17.3286	3.67464	7.06309e-08	9.47351e-07	ENSMUSG00000026743	17354	Mllt10	myeloid/lymphoid or mixed-lineage leukemia; translocated to, 10
1019.22	0.358273	0.0717798	7.12361e-08	9.54576e-07	ENSMUSG00000035828	223775	Pim3	proviral integration site 3
2609.22	0.255559	0.0494657	7.13874e-08	9.55713e-07	ENSMUSG00000022234	12465	Cct5	chaperonin containing Tcp1, subunit 5 (epsilon)
3883.37	-0.282208	0.0551164	7.1559e-08	9.57119e-07	ENSMUSG00000042751	226518	Nmnat2	nicotinamide nucleotide adenylyltransferase 2
39.3666	1.0634	0.249591	7.33583e-08	9.80271e-07	ENSMUSG00000031952	56773	Chst5	carbohydrate (N-acetylglucosamine 6-O) sulfotransferase 5
616.188	-0.267948	0.0521596	7.45698e-08	9.95534e-07	ENSMUSG00000027983	71519	Cyp2u1	cytochrome P450, family 2, subfamily u, polypeptide 1
906.408	0.264755	0.051496	7.50796e-08	1.00141e-06	ENSMUSG00000043683	14154	Fem1a	fem 1 homolog a
3837.91	0.202929	0.0387378	7.58158e-08	1.01029e-06	ENSMUSG00000025410	69654	Dctn2	dynactin 2
414.552	-0.416097	0.0851091	7.5942e-08	1.01103e-06	ENSMUSG00000043881	211255	Kbtbd7	kelch repeat and BTB (POZ) domain containing 7
1502.43	0.460261	0.0953593	7.62039e-08	1.01358e-06	ENSMUSG00000030607	11595	Acan	aggrecan
2066.52	-0.517421	0.10911	8.0758e-08	1.07316e-06	ENSMUSG00000068373	241589	D430041D05Rik	RIKEN cDNA D430041D05 gene
548.443	-0.326869	0.0651423	8.16145e-08	1.08354e-06	ENSMUSG00000075419	227697	Dolk	dolichol kinase
208.651	-0.749835	0.168349	8.24274e-08	1.09332e-06	ENSMUSG00000044749	76184	Abca6	ATP-binding cassette, sub-family A (ABC1), member 6
186.585	0.839702	0.193005	8.33834e-08	1.10498e-06	ENSMUSG00000001300	13642	Efnb2	ephrin B2
462.661	-0.455079	0.0945427	8.4239e-08	1.11529e-06	ENSMUSG00000033721	57257	Vav3	vav 3 oncogene
8.07992	5.04497	1.02216	8.45689e-08	1.11863e-06	ENSMUSG00000073489	15951	Ifi204	interferon activated gene 204
6256.43	0.256293	0.0499353	8.49296e-08	1.12237e-06	ENSMUSG00000010277	72503	2610507B11Rik	RIKEN cDNA 2610507B11 gene
2214.6	-0.199286	0.0381734	8.59353e-08	1.13461e-06	ENSMUSG00000047388	234776	Atmin	ATM interactor
541.418	0.391975	0.0801066	8.94071e-08	1.17937e-06	ENSMUSG00000027678	17979	Ncoa3	nuclear receptor coactivator 3
16405.8	-0.219097	0.0422942	9.10226e-08	1.19958e-06	ENSMUSG00000048142	269642	Nat8l	N-acetyltransferase 8-like
494.37	0.339991	0.0684581	9.48053e-08	1.24828e-06	ENSMUSG00000050069	23893	Grem2	gremlin 2, DAN family BMP antagonist
108.702	0.778706	0.177606	9.65587e-08	1.27021e-06	ENSMUSG00000023021	71949	Cers5	ceramide synthase 5
918.443	0.332505	0.0668483	9.73672e-08	1.27967e-06	ENSMUSG00000032333	69106	Stoml1	stomatin-like 1
200.561	0.603207	0.131213	9.85935e-08	1.2946e-06	ENSMUSG00000046854	227733	Pip5kl1	phosphatidylinositol-4-phosphate 5-kinase-like 1
166.681	-0.510515	0.108404	9.87947e-08	1.29606e-06	ENSMUSG00000032718	67729	Mansc1	MANSC domain containing 1
2832.82	0.407795	0.084132	9.98557e-08	1.30878e-06	ENSMUSG00000022443	17886	Myh9	myosin, heavy polypeptide 9, non-muscle
624.46	0.285301	0.0564994	1.00853e-07	1.32065e-06	ENSMUSG00000029094	70292	Afap1	actin filament associated protein 1
146.517	0.571777	0.123529	1.01685e-07	1.33033e-06	ENSMUSG00000113506	NA	NA	NA
110.881	0.571641	0.12361	1.03778e-07	1.35648e-06	ENSMUSG00000040219	235330	Ttc12	tetratricopeptide repeat domain 12
2376.12	-0.21211	0.0410637	1.04394e-07	1.36329e-06	ENSMUSG00000019818	53599	Cd164	CD164 antigen
1425.1	-0.355912	0.0723767	1.06181e-07	1.38537e-06	ENSMUSG00000049339	227298	Retreg2	reticulophagy regulator family member 2
938.004	0.399865	0.0825094	1.06532e-07	1.38869e-06	ENSMUSG00000034402	238271	Kcnh5	potassium voltage-gated channel, subfamily H (eag-related), member 5
1698.55	-0.298236	0.0594799	1.07815e-07	1.40414e-06	ENSMUSG00000038116	228829	Phf20	PHD finger protein 20
165.028	-0.503736	0.107226	1.08877e-07	1.41668e-06	ENSMUSG00000038700	15413	Hoxb5	homeobox B5
140.452	-0.569267	0.123383	1.10694e-07	1.43902e-06	ENSMUSG00000025141	68515	Myadml2	myeloid-associated differentiation marker-like 2
474.548	0.348074	0.0707328	1.11558e-07	1.44894e-06	ENSMUSG00000061607	240087	Mdc1	mediator of DNA damage checkpoint 1
227.373	-0.567821	0.123084	1.11903e-07	1.45211e-06	ENSMUSG00000020623	26399	Map2k6	mitogen-activated protein kinase kinase 6
639.75	-0.511716	0.109296	1.12041e-07	1.45259e-06	ENSMUSG00000044224	78244	Dnajc21	DnaJ heat shock protein family (Hsp40) member C21
2755.42	-0.289297	0.0576619	1.15169e-07	1.4918e-06	ENSMUSG00000057133	71389	Chd6	chromodomain helicase DNA binding protein 6
1889.42	0.355577	0.072547	1.15624e-07	1.49499e-06	ENSMUSG00000039782	231207	Cpeb2	cytoplasmic polyadenylation element binding protein 2
60.5488	-1.4872	0.348639	1.15563e-07	1.49499e-06	ENSMUSG00000047746	207215	Fbxo40	F-box protein 40
4092.51	0.391135	0.0808816	1.20179e-07	1.55249e-06	ENSMUSG00000011256	11492	Adam19	a disintegrin and metallopeptidase domain 19 (meltrin beta)
2287.21	0.400769	0.0831799	1.21866e-07	1.57287e-06	ENSMUSG00000027712	11747	Anxa5	annexin A5
3060.11	0.433741	0.0909788	1.22722e-07	1.58249e-06	ENSMUSG00000045294	231070	Insig1	insulin induced gene 1
377.17	-0.497437	0.106295	1.23547e-07	1.5917e-06	ENSMUSG00000056427	20564	Slit3	slit guidance ligand 3
71.8072	0.729935	0.166472	1.2592e-07	1.62082e-06	ENSMUSG00000041774	69101	Ydjc	YdjC homolog (bacterial)
1454.72	-0.318186	0.0642976	1.26083e-07	1.62147e-06	ENSMUSG00000087679	109299	Tmem250-ps	transmembrane protein 250, pseudogene
3147.55	0.229601	0.0450136	1.27183e-07	1.63415e-06	ENSMUSG00000053192	56772	Mllt11	myeloid/lymphoid or mixed-lineage leukemia; translocated to, 11
838.527	0.401697	0.0835614	1.27757e-07	1.64006e-06	ENSMUSG00000020840	104184	Blmh	bleomycin hydrolase
341.649	0.701307	0.158764	1.28075e-07	1.64268e-06	ENSMUSG00000026571	74106	Dcaf6	DDB1 and CUL4 associated factor 6
196.73	0.529908	0.114423	1.28226e-07	1.64311e-06	ENSMUSG00000017747	80860	Ghdc	GH3 domain containing
49.4347	0.975079	0.234622	1.28338e-07	1.64311e-06	ENSMUSG00000059554	215814	Ccdc28a	coiled-coil domain containing 28A
165.363	-0.689379	0.155559	1.28605e-07	1.64505e-06	ENSMUSG00000018322	67145	Tomm34	translocase of outer mitochondrial membrane 34
560.854	0.380698	0.0786756	1.28718e-07	1.64505e-06	ENSMUSG00000019433	67903	Gipc1	GIPC PDZ domain containing family, member 1
428.398	-0.593465	0.130391	1.29149e-07	1.64909e-06	ENSMUSG00000041669	170952	Prima1	proline rich membrane anchor 1
10115.5	0.290058	0.0581176	1.31044e-07	1.67181e-06	ENSMUSG00000028452	269523	Vcp	valosin containing protein
8670.32	0.246356	0.0486357	1.32322e-07	1.6866e-06	ENSMUSG00000005873	13476	Reep5	receptor accessory protein 5
825.757	0.444511	0.0938821	1.3367e-07	1.70228e-06	ENSMUSG00000046807	192734	Lrrc75b	leucine rich repeat containing 75B
83.558	1.02808	0.249012	1.34089e-07	1.70459e-06	ENSMUSG00000056116	15039	H2-T22	histocompatibility 2, T region locus 22
604.855	-0.334978	0.0682605	1.34063e-07	1.70459e-06	ENSMUSG00000083282	56464	Ctsf	cathepsin F
178.957	-0.558889	0.121894	1.34652e-07	1.71017e-06	ENSMUSG00000002908	84036	Kcnn1	potassium intermediate/small conductance calcium-activated channel, subfamily N, member 1
2831.76	-0.264329	0.0525415	1.34766e-07	1.71017e-06	ENSMUSG00000042359	99031	Osbpl6	oxysterol binding protein-like 6
138.601	-0.592866	0.130531	1.35436e-07	1.71715e-06	ENSMUSG00000091722	380918	Siah3	siah E3 ubiquitin protein ligase family member 3
10.8197	3.42803	0.7395	1.39744e-07	1.77021e-06	ENSMUSG00000004085	65964	Map3k20	mitogen-activated protein kinase kinase kinase 20
899.093	0.40565	0.0849133	1.43887e-07	1.82109e-06	ENSMUSG00000028385	209131	Snx30	sorting nexin family member 30
740.063	0.304852	0.0616735	1.46463e-07	1.85206e-06	ENSMUSG00000042298	72795	Ttc19	tetratricopeptide repeat domain 19
1031.2	0.52722	0.114641	1.519e-07	1.91913e-06	ENSMUSG00000006304	76709	Arpc2	actin related protein 2/3 complex, subunit 2
1089.46	0.280245	0.0563331	1.55818e-07	1.96689e-06	ENSMUSG00000036078	18391	Sigmar1	sigma non-opioid intracellular receptor 1
134.735	0.679829	0.154509	1.56739e-07	1.97679e-06	ENSMUSG00000024747	26358	Aldh1a7	aldehyde dehydrogenase family 1, subfamily A7
268.468	-0.459312	0.0981527	1.58182e-07	1.99324e-06	ENSMUSG00000032318	104360	Isl2	insulin related protein 2 (islet 2)
1152.12	-0.348428	0.0718347	1.59067e-07	2.00263e-06	ENSMUSG00000028657	19063	Ppt1	palmitoyl-protein thioesterase 1
2559.8	-0.175152	0.0341365	1.65293e-07	2.07919e-06	ENSMUSG00000048701	76551	Ccdc6	coiled-coil domain containing 6
572.406	-0.303193	0.0616075	1.66095e-07	2.08746e-06	ENSMUSG00000022802	239833	Lmln	leishmanolysin-like (metallopeptidase M8 family)
200.151	-0.545112	0.119999	1.78088e-07	2.23622e-06	ENSMUSG00000035275	242570	Raver2	ribonucleoprotein, PTB-binding 2
992.836	0.241791	0.0482109	1.78886e-07	2.24428e-06	ENSMUSG00000039041	56436	Adrm1	adhesion regulating molecule 1
3417.68	0.256311	0.0514325	1.8534e-07	2.32321e-06	ENSMUSG00000020668	16570	Kif3c	kinesin family member 3C
4470.1	0.237719	0.0474342	1.8902e-07	2.36728e-06	ENSMUSG00000037351	226977	Actr1b	ARP1 actin-related protein 1B, centractin beta
843.455	-0.503959	0.110131	1.95003e-07	2.44008e-06	ENSMUSG00000035133	11855	Arhgap5	Rho GTPase activating protein 5
1962.98	0.390488	0.0823914	1.95172e-07	2.44008e-06	ENSMUSG00000040711	268396	Sh3pxd2b	SH3 and PX domains 2B
282.052	-0.353027	0.0735509	1.97103e-07	2.46208e-06	ENSMUSG00000036306	211134	Lzts1	leucine zipper, putative tumor suppressor 1
6.51044	3.7902	0.818187	1.98755e-07	2.48055e-06	ENSMUSG00000025091	18947	Pnliprp2	pancreatic lipase-related protein 2
3060.84	-0.211738	0.0419796	1.98959e-07	2.48094e-06	ENSMUSG00000063801	11778	Ap3s2	adaptor-related protein complex 3, sigma 2 subunit
485.398	-0.326418	0.0674401	2.03262e-07	2.5324e-06	ENSMUSG00000029681	12054	Bcl7b	B cell CLL/lymphoma 7B
1376.84	-0.309339	0.0635145	2.03528e-07	2.53352e-06	ENSMUSG00000062232	76089	Rapgef2	Rap guanine nucleotide exchange factor (GEF) 2
61.551	1.54643	0.374608	2.10787e-07	2.6216e-06	ENSMUSG00000042312	20196	S100a13	S100 calcium binding protein A13
2083.73	-0.195189	0.0385953	2.11048e-07	2.62258e-06	ENSMUSG00000042350	68497	Arel1	apoptosis resistant E3 ubiquitin protein ligase 1
148.595	0.53374	0.118078	2.11503e-07	2.62597e-06	ENSMUSG00000049922	228368	Slc35c1	solute carrier family 35, member C1
816.337	-0.388755	0.0822828	2.12819e-07	2.64002e-06	ENSMUSG00000038564	67661	Ift172	intraflagellar transport 172
3034.29	-0.512661	0.112829	2.15221e-07	2.66751e-06	ENSMUSG00000003657	12308	Calb2	calbindin 2
1550.4	-0.38975	0.082638	2.19886e-07	2.72298e-06	ENSMUSG00000024935	20510	Slc1a1	solute carrier family 1 (neuronal/epithelial high affinity glutamate transporter, system Xag), member 1
1887.52	-0.374532	0.0790562	2.24034e-07	2.77196e-06	ENSMUSG00000022508	12053	Bcl6	B cell leukemia/lymphoma 6
885.509	-0.468823	0.102061	2.24519e-07	2.77557e-06	ENSMUSG00000074738	230991	Fndc10	fibronectin type III domain containing 10
878.144	-0.242169	0.0487439	2.27468e-07	2.80961e-06	ENSMUSG00000037822	68552	Smim14	small integral membrane protein 14
1700.18	-0.191887	0.0380673	2.35905e-07	2.91132e-06	ENSMUSG00000028124	14630	Gclm	glutamate-cysteine ligase, modifier subunit
1092.5	-0.324718	0.0674752	2.37117e-07	2.92376e-06	ENSMUSG00000039313	209743	Minar1	membrane integral NOTCH2 associated receptor 1
1188.86	0.458523	0.099888	2.44222e-07	3.00879e-06	ENSMUSG00000019907	17931	Ppp1r12a	protein phosphatase 1, regulatory subunit 12A
45.3545	-1.29101	0.32258	2.55708e-07	3.1476e-06	ENSMUSG00000090667	330390	Mdfic2	MyoD family inhibitor domain containing 2
589.189	0.252963	0.0513841	2.60517e-07	3.20404e-06	ENSMUSG00000005732	19385	Ranbp1	RAN binding protein 1
2513.81	0.203568	0.0406788	2.60801e-07	3.20404e-06	ENSMUSG00000025178	84095	Pi4k2a	phosphatidylinositol 4-kinase type 2 alpha
1155.14	-0.217632	0.0436813	2.60963e-07	3.20404e-06	ENSMUSG00000026430	54354	Rassf5	Ras association (RalGDS/AF-6) domain family member 5
1353.49	0.349341	0.0735567	2.61395e-07	3.20661e-06	ENSMUSG00000027187	12359	Cat	catalase
1435.3	-0.281535	0.0578141	2.63378e-07	3.22817e-06	ENSMUSG00000022013	66148	Dnajc15	DnaJ heat shock protein family (Hsp40) member C15
36.6938	1.25652	0.315346	2.63836e-07	3.23103e-06	ENSMUSG00000037580	14528	Gch1	GTP cyclohydrolase 1
2891.05	-0.214392	0.0430595	2.72618e-07	3.33574e-06	ENSMUSG00000024241	20662	Sos1	SOS Ras/Rac guanine nucleotide exchange factor 1
1740.96	0.329714	0.0691031	2.78289e-07	3.40223e-06	ENSMUSG00000035798	320150	Zdhhc17	zinc finger, DHHC domain containing 17
1545.81	0.597054	0.13644	2.82249e-07	3.4477e-06	ENSMUSG00000020044	21859	Timp3	tissue inhibitor of metalloproteinase 3
281.904	0.554246	0.125085	2.82752e-07	3.45092e-06	ENSMUSG00000020803	52700	Txndc17	thioredoxin domain containing 17
2169.18	0.606384	0.139134	2.89305e-07	3.5279e-06	ENSMUSG00000025321	320910	Itgb8	integrin beta 8
106.338	0.761025	0.183343	2.94493e-07	3.58812e-06	ENSMUSG00000114025	NA	NA	NA
1040.92	-0.269464	0.0553415	2.94936e-07	3.59047e-06	ENSMUSG00000074093	75744	Svip	small VCP/p97-interacting protein
241.37	0.584159	0.13329	2.9533e-07	3.59222e-06	ENSMUSG00000028919	213649	Arhgef19	Rho guanine nucleotide exchange factor (GEF) 19
96.838	16.8875	3.98569	2.98684e-07	3.62995e-06	ENSMUSG00000020593	14245	Lpin1	lipin 1
836.353	0.579895	0.13225	2.99762e-07	3.63997e-06	ENSMUSG00000015714	76893	Cers2	ceramide synthase 2
1999.05	-0.226536	0.0459084	3.09531e-07	3.75542e-06	ENSMUSG00000056553	19276	Ptprn2	protein tyrosine phosphatase, receptor type, N polypeptide 2
1827.69	-0.358713	0.0763499	3.10001e-07	3.75794e-06	ENSMUSG00000001313	11858	Rnd2	Rho family GTPase 2
2227.04	0.300791	0.0626459	3.10993e-07	3.76679e-06	ENSMUSG00000001416	12462	Cct3	chaperonin containing Tcp1, subunit 3 (gamma)
157.483	-0.62634	0.145168	3.12633e-07	3.78347e-06	ENSMUSG00000005268	19116	Prlr	prolactin receptor
1190.56	0.242579	0.0494604	3.1395e-07	3.79301e-06	ENSMUSG00000025917	26754	Cops5	COP9 signalosome subunit 5
719.644	0.348656	0.0739732	3.13927e-07	3.79301e-06	ENSMUSG00000073433	14570	Arhgdig	Rho GDP dissociation inhibitor (GDI) gamma
2103.46	-0.387311	0.0833543	3.1498e-07	3.80226e-06	ENSMUSG00000033152	319655	Podxl2	podocalyxin-like 2
397.135	0.304844	0.0636343	3.16421e-07	3.81645e-06	ENSMUSG00000036693	75416	Nop14	NOP14 nucleolar protein
640.241	0.623645	0.144542	3.17541e-07	3.82674e-06	ENSMUSG00000029121	12933	Crmp1	collapsin response mediator protein 1
1298.41	0.523454	0.117768	3.19089e-07	3.84217e-06	ENSMUSG00000037487	70790	Ubr5	ubiquitin protein ligase E3 component n-recognin 5
8.69171	2.95194	0.689737	3.21056e-07	3.86262e-06	ENSMUSG00000043366	170639	Olfr78	olfactory receptor 78
47.2826	1.72957	0.427435	3.24476e-07	3.9005e-06	ENSMUSG00000028413	14595	B4galt1	UDP-Gal:betaGlcNAc beta 1,4- galactosyltransferase, polypeptide 1
365.367	-0.400906	0.0868337	3.2647e-07	3.92119e-06	ENSMUSG00000095407	622645	Tmem200c	transmembrane protein 200C
353.427	0.342115	0.072595	3.33254e-07	3.99932e-06	ENSMUSG00000072623	22750	Zfp9	zinc finger protein 9
539.98	-0.287655	0.0598928	3.48305e-07	4.17298e-06	ENSMUSG00000030614	68472	Tmem126b	transmembrane protein 126B
2729.98	-0.238438	0.048748	3.48255e-07	4.17298e-06	ENSMUSG00000032870	69780	Smap2	small ArfGAP 2
662.322	0.34649	0.0738098	3.50883e-07	4.19337e-06	ENSMUSG00000000561	70465	Wdr77	WD repeat domain 77
192.082	-0.417138	0.0911556	3.50809e-07	4.19337e-06	ENSMUSG00000015942	114674	Gtf2ird2	GTF2I repeat domain containing 2
169.272	0.593359	0.136962	3.50512e-07	4.19337e-06	ENSMUSG00000022679	93734	Mpv17l	Mpv17 transgene, kidney disease mutant-like
126.606	0.633821	0.148555	3.69415e-07	4.41118e-06	ENSMUSG00000043441	229357	Gpr149	G protein-coupled receptor 149
10.085	2.26137	0.555967	3.77437e-07	4.49949e-06	ENSMUSG00000047592	381680	Nxpe5	neurexophilin and PC-esterase domain family, member 5
7.60401	4.50217	0.989009	3.77217e-07	4.49949e-06	ENSMUSG00000096878	105242399	Gm21083	predicted gene, 21083
107.796	-0.552845	0.126564	3.79133e-07	4.51596e-06	ENSMUSG00000036907	226359	C1ql2	complement component 1, q subcomponent-like 2
440.528	0.837011	0.209248	3.84056e-07	4.57081e-06	ENSMUSG00000037428	381677	Vgf	VGF nerve growth factor inducible
924.67	-0.280406	0.0585445	3.97563e-07	4.72456e-06	ENSMUSG00000004394	103694	Tmed4	transmembrane p24 trafficking protein 4
476.425	0.467501	0.104493	3.97632e-07	4.72456e-06	ENSMUSG00000022951	54720	Rcan1	regulator of calcineurin 1
133.765	0.839737	0.210661	4.02148e-07	4.77426e-06	ENSMUSG00000073563	70425	Csnk1g3	casein kinase 1, gamma 3
13.2164	4.11482	0.915351	4.03787e-07	4.78581e-06	ENSMUSG00000038151	12142	Prdm1	PR domain containing 1, with ZNF domain
289.413	-0.390732	0.0851386	4.03575e-07	4.78581e-06	ENSMUSG00000063430	320916	Wscd2	WSC domain containing 2
968.784	0.3903	0.0851234	4.13283e-07	4.89432e-06	ENSMUSG00000075590	223649	Nrbp2	nuclear receptor binding protein 2
483.469	-0.454806	0.101434	4.14111e-07	4.89605e-06	ENSMUSG00000045625	239827	Pigz	phosphatidylinositol glycan anchor biosynthesis, class Z
217.708	-0.512057	0.116293	4.14012e-07	4.89605e-06	ENSMUSG00000074622	16658	Mafb	v-maf musculoaponeurotic fibrosarcoma oncogene family, protein B (avian)
992.866	0.337437	0.0722343	4.24635e-07	5.01636e-06	ENSMUSG00000026003	11363	Acadl	acyl-Coenzyme A dehydrogenase, long-chain
539.427	-0.2908	0.0611534	4.28631e-07	5.0594e-06	ENSMUSG00000026470	58244	Stx6	syntaxin 6
1562.81	-0.300974	0.0635593	4.30906e-07	5.08207e-06	ENSMUSG00000051146	73047	Camk2n2	calcium/calmodulin-dependent protein kinase II inhibitor 2
866.686	0.389665	0.0852157	4.40735e-07	5.19373e-06	ENSMUSG00000050840	23836	Cdh20	cadherin 20
876.196	-0.273227	0.0571466	4.42785e-07	5.21361e-06	ENSMUSG00000022228	432731	Zscan26	zinc finger and SCAN domain containing 26
685.369	0.503943	0.11464	4.50196e-07	5.29653e-06	ENSMUSG00000021557	67269	Agtpbp1	ATP/GTP binding protein 1
37.1349	18.0384	4.41688	4.51174e-07	5.3037e-06	ENSMUSG00000039220	52040	Ppp1r10	protein phosphatase 1, regulatory subunit 10
1337.43	-0.200127	0.0408396	4.56756e-07	5.36492e-06	ENSMUSG00000032047	110446	Acat1	acetyl-Coenzyme A acetyltransferase 1
215.535	-0.420443	0.0932016	4.65545e-07	5.46368e-06	ENSMUSG00000042616	230751	Oscp1	organic solute carrier partner 1
208.756	-0.470919	0.106215	4.68562e-07	5.49461e-06	ENSMUSG00000038286	68021	Bphl	biphenyl hydrolase-like (serine hydrolase, breast epithelial mucin-associated antigen)
163.64	0.742592	0.182776	4.71084e-07	5.51968e-06	ENSMUSG00000037062	54673	Sh3glb1	SH3-domain GRB2-like B1 (endophilin)
536.632	0.279652	0.0588042	4.73756e-07	5.54646e-06	ENSMUSG00000024556	107029	Me2	malic enzyme 2, NAD(+)-dependent, mitochondrial
173.563	0.573266	0.133704	4.80881e-07	5.62529e-06	ENSMUSG00000002228	71887	Ppm1j	protein phosphatase 1J
63.714	4.0615	0.916514	4.90424e-07	5.73225e-06	ENSMUSG00000079592	235312	C1qtnf5	C1q and tumor necrosis factor related protein 5
1500.98	-0.202818	0.0415548	4.93995e-07	5.7693e-06	ENSMUSG00000029613	15467	Eif2ak1	eukaryotic translation initiation factor 2 alpha kinase 1
759.653	0.343981	0.0743372	4.96546e-07	5.79438e-06	ENSMUSG00000029518	77407	Rab35	RAB35, member RAS oncogene family
13019.5	-0.266602	0.0558951	4.97904e-07	5.80551e-06	ENSMUSG00000020483	68097	Dynll2	dynein light chain LC8-type 2
5.97869	4.18979	0.943128	5.01066e-07	5.83291e-06	ENSMUSG00000036136	104943	Fam110c	family with sequence similarity 110, member C
2940.94	0.213238	0.0438623	5.00907e-07	5.83291e-06	ENSMUSG00000054843	226255	Atrnl1	attractin like 1
84.6617	1.71725	0.438238	5.07747e-07	5.9059e-06	ENSMUSG00000052353	80982	Cemip	cell migration inducing protein, hyaluronan binding
919.431	0.346183	0.0750094	5.16422e-07	6.00195e-06	ENSMUSG00000021665	15212	Hexb	hexosaminidase B
76.1425	0.672931	0.162824	5.21683e-07	6.05819e-06	ENSMUSG00000114139	100504660	Gm20336	predicted gene, 20336
33.7867	1.11485	0.294058	5.2376e-07	6.07739e-06	ENSMUSG00000029005	70433	Draxin	dorsal inhibitory axon guidance protein
826.934	-0.248478	0.051878	5.3089e-07	6.15516e-06	ENSMUSG00000027804	67738	Ppid	peptidylprolyl isomerase D (cyclophilin D)
630.529	-0.290285	0.0616289	5.37543e-07	6.22726e-06	ENSMUSG00000029017	73078	Pmpcb	peptidase (mitochondrial processing) beta
315.55	0.626025	0.14943	5.39956e-07	6.25017e-06	ENSMUSG00000113670	NA	NA	NA
2738.23	0.237196	0.0493859	5.48954e-07	6.34922e-06	ENSMUSG00000071072	56351	Ptges3	prostaglandin E synthase 3
360.26	0.346523	0.0753044	5.49568e-07	6.3512e-06	ENSMUSG00000032519	208638	Slc25a38	solute carrier family 25, member 38
420.17	0.377629	0.0830662	5.51036e-07	6.36305e-06	ENSMUSG00000030663	56372	1110004F10Rik	RIKEN cDNA 1110004F10 gene
158.846	0.545452	0.12706	5.54613e-07	6.39921e-06	ENSMUSG00000045932	15958	Ifit2	interferon-induced protein with tetratricopeptide repeats 2
674.061	-0.261307	0.0549316	5.56406e-07	6.41474e-06	ENSMUSG00000029167	19017	Ppargc1a	peroxisome proliferative activated receptor, gamma, coactivator 1 alpha
2647.26	-0.226418	0.046998	5.59664e-07	6.44714e-06	ENSMUSG00000035246	236899	Pcyt1b	phosphate cytidylyltransferase 1, choline, beta isoform
606.823	0.449274	0.101643	5.77874e-07	6.65157e-06	ENSMUSG00000035392	227801	Dennd1a	DENN/MADD domain containing 1A
999.169	0.306621	0.0657687	5.85501e-07	6.73397e-06	ENSMUSG00000022270	66270	Retreg1	reticulophagy regulator 1
271.932	0.716941	0.177473	5.97813e-07	6.87007e-06	ENSMUSG00000031168	13595	Ebp	phenylalkylamine Ca2+ antagonist (emopamil) binding protein
152.653	-0.531189	0.123775	6.08187e-07	6.9837e-06	ENSMUSG00000051062	237730	Fbll1	fibrillarin-like 1
243.703	1.15082	0.306819	6.16331e-07	7.07156e-06	ENSMUSG00000028063	16905	Lmna	lamin A
1366.54	0.635635	0.153404	6.20571e-07	7.11453e-06	ENSMUSG00000021703	218442	Serinc5	serine incorporator 5
815.892	0.257824	0.0544223	6.32132e-07	7.24129e-06	ENSMUSG00000022451	19230	Twf1	twinfilin actin binding protein 1
7.44057	4.73184	1.07484	6.45345e-07	7.38676e-06	ENSMUSG00000035498	109332	Cdcp1	CUB domain containing protein 1
632.658	0.31159	0.0672943	6.52937e-07	7.4677e-06	ENSMUSG00000028405	11428	Aco1	aconitase 1
380.883	-0.440963	0.100085	6.54107e-07	7.47513e-06	ENSMUSG00000021259	13116	Cyp46a1	cytochrome P450, family 46, subfamily a, polypeptide 1
90.3765	-0.664774	0.162851	6.77106e-07	7.72936e-06	ENSMUSG00000026220	71781	Slc16a14	solute carrier family 16 (monocarboxylic acid transporters), member 14
1001.77	0.370797	0.0821379	6.77429e-07	7.72936e-06	ENSMUSG00000045767	78521	B230219D22Rik	RIKEN cDNA B230219D22 gene
443.272	0.391044	0.0873077	6.78621e-07	7.73682e-06	ENSMUSG00000067629	240057	Syngap1	synaptic Ras GTPase activating protein 1 homolog (rat)
384.205	-0.481811	0.111135	6.82569e-07	7.77566e-06	ENSMUSG00000029307	13406	Dmp1	dentin matrix protein 1
3822.86	0.219268	0.0458151	6.96001e-07	7.92238e-06	ENSMUSG00000048388	241520	Fam171b	family with sequence similarity 171, member B
827.429	0.25588	0.0542003	6.97534e-07	7.93355e-06	ENSMUSG00000024158	14651	Hagh	hydroxyacyl glutathione hydrolase
191.324	-0.579535	0.138254	7.03709e-07	7.99148e-06	ENSMUSG00000025735	214951	Rhbdl1	rhomboid like 1
629.636	0.334519	0.073169	7.0374e-07	7.99148e-06	ENSMUSG00000036352	98766	Ubac1	ubiquitin associated domain containing 1
542.972	-0.386048	0.086341	7.32225e-07	8.30839e-06	ENSMUSG00000024983	53611	Vti1a	vesicle transport through interaction with t-SNAREs 1A
67.8524	-0.86133	0.225856	7.44376e-07	8.43959e-06	ENSMUSG00000025202	30049	Scd3	stearoyl-coenzyme A desaturase 3
37.8466	1.52271	0.403755	7.54772e-07	8.55071e-06	ENSMUSG00000024036	224674	Slc37a1	solute carrier family 37 (glycerol-3-phosphate transporter), member 1
25.8379	2.32678	0.599914	7.5576e-07	8.55515e-06	ENSMUSG00000079014	628900	Serpina3i	serine (or cysteine) peptidase inhibitor, clade A, member 3I
561.446	-0.342643	0.0754942	7.67347e-07	8.67948e-06	ENSMUSG00000018849	211652	Wwc1	WW, C2 and coiled-coil domain containing 1
198.727	0.504025	0.117915	7.76867e-07	8.78025e-06	ENSMUSG00000018442	116891	Derl2	Der1-like domain family, member 2
669.036	0.300159	0.0650958	7.94701e-07	8.97475e-06	ENSMUSG00000048429	69773	Timm29	translocase of inner mitochondrial membrane 29
99.2639	0.90765	0.241613	7.98826e-07	9.01425e-06	ENSMUSG00000039037	26938	St6galnac5	ST6 (alpha-N-acetyl-neuraminyl-2,3-beta-galactosyl-1,3)-N-acetylgalactosaminide alpha-2,6-sialyltransferase 5
31.0017	1.24548	0.337171	8.01083e-07	9.03262e-06	ENSMUSG00000005148	12224	Klf5	Kruppel-like factor 5
211.798	0.478541	0.11138	8.30516e-07	9.35714e-06	ENSMUSG00000058587	50875	Tmod3	tropomodulin 3
2918.53	0.570465	0.136969	8.34004e-07	9.38908e-06	ENSMUSG00000068220	16852	Lgals1	lectin, galactose binding, soluble 1
1495.42	-0.254911	0.0544419	8.50391e-07	9.56607e-06	ENSMUSG00000035936	214579	Aldh5a1	aldhehyde dehydrogenase family 5, subfamily A1
103.283	0.740178	0.188843	8.5832e-07	9.6477e-06	ENSMUSG00000030189	56449	Ybx3	Y box protein 3
91.773	1.01496	0.275708	8.5909e-07	9.64881e-06	ENSMUSG00000030898	12426	Cckbr	cholecystokinin B receptor
601.325	0.426413	0.0977392	8.85093e-07	9.9331e-06	ENSMUSG00000050473	76157	Slc35d3	solute carrier family 35, member D3
953.124	0.31836	0.0699333	8.91901e-07	1.00017e-05	ENSMUSG00000024493	107045	Lars	leucyl-tRNA synthetase
9.90619	5.14182	1.1985	8.95e-07	1.00208e-05	ENSMUSG00000022906	80285	Parp9	poly (ADP-ribose) polymerase family, member 9
1396.51	-0.223272	0.0472199	8.94655e-07	1.00208e-05	ENSMUSG00000028790	20218	Khdrbs1	KH domain containing, RNA binding, signal transduction associated 1
10090.4	0.277095	0.059864	9.01103e-07	1.00813e-05	ENSMUSG00000054263	16880	Lifr	LIF receptor alpha
538.743	0.293966	0.0639589	9.03077e-07	1.00955e-05	ENSMUSG00000045174	211383	Amer3	APC membrane recruitment 3
824.917	0.387534	0.0876306	9.07767e-07	1.014e-05	ENSMUSG00000039988	433667	Ankrd13c	ankyrin repeat domain 13c
234.044	0.574504	0.138852	9.15298e-07	1.02162e-05	ENSMUSG00000042942	381157	Greb1l	growth regulation by estrogen in breast cancer-like
846.326	-0.322654	0.0711126	9.21907e-07	1.0282e-05	ENSMUSG00000030647	68197	Ndufc2	NADH:ubiquinone oxidoreductase subunit C2
927.403	0.33684	0.0747079	9.29767e-07	1.03616e-05	ENSMUSG00000020015	237459	Cdk17	cyclin-dependent kinase 17
373.19	0.476129	0.111467	9.43486e-07	1.05063e-05	ENSMUSG00000002343	76813	Armc6	armadillo repeat containing 6
7.9337	4.42422	1.03727	9.51462e-07	1.05869e-05	ENSMUSG00000015533	16398	Itga2	integrin alpha 2
264.091	-0.443332	0.102636	9.53138e-07	1.05974e-05	ENSMUSG00000049536	237052	Tceal1	transcription elongation factor A (SII)-like 1
2265.25	-0.2709	0.0585277	9.54259e-07	1.06016e-05	ENSMUSG00000037098	215445	Rab11fip3	RAB11 family interacting protein 3 (class II)
708.741	0.279395	0.0605866	9.58734e-07	1.06431e-05	ENSMUSG00000033732	101943	Sf3b3	splicing factor 3b, subunit 3
1593.77	0.277923	0.0602338	9.59804e-07	1.06468e-05	ENSMUSG00000021536	210044	Adcy2	adenylate cyclase 2
1489.96	-0.16848	0.0351235	9.63799e-07	1.06829e-05	ENSMUSG00000014769	19170	Psmb1	proteasome (prosome, macropain) subunit, beta type 1
1140.21	-0.240516	0.0513651	9.6539e-07	1.06922e-05	ENSMUSG00000015994	14272	Fnta	farnesyltransferase, CAAX box, alpha
774.173	-0.472024	0.110598	9.85158e-07	1.09028e-05	ENSMUSG00000032050	19684	Rdx	radixin
609.516	-0.29327	0.0640517	9.8829e-07	1.0929e-05	ENSMUSG00000032702	107351	Kank1	KN motif and ankyrin repeat domains 1
423.013	-0.358364	0.08048	1.00277e-06	1.10806e-05	ENSMUSG00000021993	70478	Mipep	mitochondrial intermediate peptidase
1250.48	0.330649	0.0734753	1.02265e-06	1.12916e-05	ENSMUSG00000045114	69017	Prrt2	proline-rich transmembrane protein 2
22.1635	3.19555	0.797783	1.03464e-06	1.14152e-05	ENSMUSG00000051439	12475	Cd14	CD14 antigen
74.8638	1.61947	0.438634	1.04504e-06	1.15211e-05	ENSMUSG00000051048	320452	P4ha3	procollagen-proline, 2-oxoglutarate 4-dioxygenase (proline 4-hydroxylase), alpha polypeptide III
350.657	-0.409667	0.0941294	1.05314e-06	1.15926e-05	ENSMUSG00000020607	105005	Lratd1	LRAT domain containing 1
481.2	0.478736	0.112832	1.0525e-06	1.15926e-05	ENSMUSG00000047368	226016	Abhd17b	abhydrolase domain containing 17B
1736.07	-0.32706	0.0726839	1.05763e-06	1.16331e-05	ENSMUSG00000069806	81904	Cacng7	calcium channel, voltage-dependent, gamma subunit 7
954.951	0.305625	0.0673914	1.08614e-06	1.19375e-05	ENSMUSG00000023809	20112	Rps6ka2	ribosomal protein S6 kinase, polypeptide 2
140.074	-0.611859	0.151455	1.10371e-06	1.21214e-05	ENSMUSG00000000531	56149	Tamalin	trafficking regulator and scaffold protein tamalin
1559.53	-0.208344	0.0442761	1.13076e-06	1.2409e-05	ENSMUSG00000063410	223255	Stk24	serine/threonine kinase 24
1121.48	0.306936	0.0678905	1.14679e-06	1.25561e-05	ENSMUSG00000001424	56463	Snd1	staphylococcal nuclease and tudor domain containing 1
1584.29	-0.204914	0.0435221	1.1466e-06	1.25561e-05	ENSMUSG00000023150	117198	Ivns1abp	influenza virus NS1A binding protein
461.254	0.51097	0.122363	1.14613e-06	1.25561e-05	ENSMUSG00000074247	66498	Dda1	DET1 and DDB1 associated 1
431.946	-0.358187	0.0809697	1.14951e-06	1.25763e-05	ENSMUSG00000091512	56692	Lamtor3	late endosomal/lysosomal adaptor, MAPK and MTOR activator 3
1255.61	-0.355207	0.0802077	1.15276e-06	1.26023e-05	ENSMUSG00000025475	52389	Adgra1	adhesion G protein-coupled receptor A1
244.482	-0.318	0.0706907	1.15396e-06	1.26058e-05	ENSMUSG00000051502	70240	Ufsp1	UFM1-specific peptidase 1
162.089	1.01101	0.280679	1.1735e-06	1.28096e-05	ENSMUSG00000069227	26913	Gprin1	G protein-regulated inducer of neurite outgrowth 1
15.0112	2.56595	0.676446	1.1757e-06	1.28238e-05	ENSMUSG00000113411	NA	NA	NA
1496.27	0.329419	0.0736564	1.17745e-06	1.28332e-05	ENSMUSG00000030284	171508	Creld1	cysteine-rich with EGF-like domains 1
7709.04	-0.27373	0.059797	1.18722e-06	1.29298e-05	ENSMUSG00000036800	70363	Fam135b	family with sequence similarity 135, member B
424.384	-0.744174	0.194251	1.19544e-06	1.30095e-05	ENSMUSG00000004151	14009	Etv1	ets variant 1
138.653	0.598468	0.148282	1.21521e-06	1.32147e-05	ENSMUSG00000035559	234384	Mpv17l2	MPV17 mitochondrial membrane protein-like 2
500.12	-0.313848	0.0698686	1.2351e-06	1.34208e-05	ENSMUSG00000026755	74192	Arpc5l	actin related protein 2/3 complex, subunit 5-like
445.849	-0.27924	0.0613162	1.2629e-06	1.37124e-05	ENSMUSG00000048920	243853	Fkrp	fukutin related protein
243.63	-0.418083	0.0973229	1.27465e-06	1.38296e-05	ENSMUSG00000014786	277973	Slc9a5	solute carrier family 9 (sodium/hydrogen exchanger), member 5
306.332	0.462261	0.109474	1.28665e-06	1.39492e-05	ENSMUSG00000051951	497097	Xkr4	X-linked Kx blood group related 4
1654.34	0.297847	0.0659982	1.29416e-06	1.40201e-05	ENSMUSG00000038267	73102	Slc22a23	solute carrier family 22, member 23
459.34	0.459433	0.108776	1.30545e-06	1.41317e-05	ENSMUSG00000048040	76976	Arxes2	adipocyte-related X-chromosome expressed sequence 2
1781.85	0.329984	0.0741716	1.30685e-06	1.41362e-05	ENSMUSG00000020189	237542	Osbpl8	oxysterol binding protein-like 8
1119.77	-0.359601	0.0819197	1.32873e-06	1.43621e-05	ENSMUSG00000028005	54195	Gucy1b1	guanylate cyclase 1, soluble, beta 1
742.139	-0.309496	0.0690338	1.33824e-06	1.4454e-05	ENSMUSG00000037110	241694	Ralgapa2	Ral GTPase activating protein, alpha subunit 2 (catalytic)
35045.3	0.320739	0.0719081	1.34544e-06	1.451e-05	ENSMUSG00000025203	20250	Scd2	stearoyl-Coenzyme A desaturase 2
6141.39	0.271739	0.0596544	1.34514e-06	1.451e-05	ENSMUSG00000027438	17957	Napb	N-ethylmaleimide sensitive fusion protein attachment protein beta
421.426	0.315061	0.0704731	1.34981e-06	1.45461e-05	ENSMUSG00000020116	66249	Pno1	partner of NOB1 homolog
515.639	0.401195	0.09305	1.35109e-06	1.4549e-05	ENSMUSG00000019927	216080	Ube2d1	ubiquitin-conjugating enzyme E2D 1
746.18	0.273176	0.0600247	1.35415e-06	1.4571e-05	ENSMUSG00000040661	81000	Rad54l2	RAD54 like 2 (S. cerevisiae)
7.55455	4.42934	1.06874	1.35667e-06	1.45872e-05	ENSMUSG00000000958	20540	Slc7a7	solute carrier family 7 (cationic amino acid transporter, y+ system), member 7
328.408	-0.418432	0.0978703	1.39345e-06	1.49716e-05	ENSMUSG00000050211	329502	Pla2g4e	phospholipase A2, group IVE
2434.46	0.25482	0.0556417	1.39567e-06	1.49842e-05	ENSMUSG00000047547	74325	Cltb	clathrin, light polypeptide (Lcb)
1145.56	-0.221067	0.047651	1.40612e-06	1.50851e-05	ENSMUSG00000045216	50785	Hs6st1	heparan sulfate 6-O-sulfotransferase 1
226.027	0.462855	0.110408	1.46401e-06	1.56944e-05	ENSMUSG00000048371	382051	Pdp2	pyruvate dehyrogenase phosphatase catalytic subunit 2
5242.98	0.341955	0.0777021	1.46917e-06	1.5738e-05	ENSMUSG00000031207	17698	Msn	moesin
408.288	-0.411795	0.0964416	1.50159e-06	1.60733e-05	ENSMUSG00000024427	24066	Spry4	sprouty RTK signaling antagonist 4
328.119	1.34107	0.379364	1.50647e-06	1.61135e-05	ENSMUSG00000031799	326618	Tpm4	tropomyosin 4
3468.45	-0.322995	0.0729326	1.5278e-06	1.63295e-05	ENSMUSG00000020333	216739	Acsl6	acyl-CoA synthetase long-chain family member 6
683.008	0.256548	0.0563359	1.55332e-06	1.65899e-05	ENSMUSG00000031246	56726	Sh3bgrl	SH3-binding domain glutamic acid-rich protein like
53.3851	0.94867	0.266679	1.55545e-06	1.66004e-05	ENSMUSG00000049122	242506	Frmd3	FERM domain containing 3
303.113	-0.409053	0.09596	1.58319e-06	1.68839e-05	ENSMUSG00000022525	27281	Plaat1	phospholipase A and acyltransferase 1
2339.4	0.270877	0.0599261	1.60018e-06	1.70524e-05	ENSMUSG00000002812	14248	Flii	flightless I actin binding protein
4335.05	-0.182013	0.0389608	1.62684e-06	1.73236e-05	ENSMUSG00000025743	20970	Sdc3	syndecan 3
1505.74	0.300804	0.0675284	1.65636e-06	1.76249e-05	ENSMUSG00000035049	107094	Rrp12	ribosomal RNA processing 12 homolog
357.817	-0.359942	0.0829859	1.68207e-06	1.78853e-05	ENSMUSG00000041544	242748	Disp3	dispatched RND transporter family member 3
263.781	-0.352883	0.0811189	1.68533e-06	1.79067e-05	ENSMUSG00000042505	71238	Sdhaf3	succinate dehydrogenase complex assembly factor 3
2149.57	-0.3126	0.0707479	1.75826e-06	1.86677e-05	ENSMUSG00000021285	21981	Ppp1r13b	protein phosphatase 1, regulatory subunit 13B
1480.98	0.207447	0.0449539	1.76941e-06	1.87722e-05	ENSMUSG00000020577	66109	Tspan13	tetraspanin 13
189.367	-0.461195	0.111106	1.77286e-06	1.87949e-05	ENSMUSG00000040502	216438	Marchf9	membrane associated ring-CH-type finger 9
3900.05	-0.615273	0.157256	1.81948e-06	1.9275e-05	ENSMUSG00000026932	67991	Nacc2	nucleus accumbens associated 2, BEN and BTB (POZ) domain containing
27.7679	2.22257	0.620914	1.84868e-06	1.95698e-05	ENSMUSG00000055044	54132	Pdlim1	PDZ and LIM domain 1 (elfin)
157.77	0.561131	0.140683	1.85385e-06	1.96101e-05	ENSMUSG00000050064	242109	Zfp697	zinc finger protein 697
562.399	0.298939	0.0674605	1.87584e-06	1.98282e-05	ENSMUSG00000031563	52357	Wwc2	WW, C2 and coiled-coil domain containing 2
278.049	0.351569	0.0812196	1.8801e-06	1.98585e-05	ENSMUSG00000032353	66111	Tmed3	transmembrane p24 trafficking protein 3
37.0734	1.00467	0.288926	1.89602e-06	2.0012e-05	ENSMUSG00000038331	212712	Satb2	special AT-rich sequence binding protein 2
226.183	0.435216	0.104252	1.92177e-06	2.02689e-05	ENSMUSG00000028057	19769	Rit1	Ras-like without CAAX 1
20.6806	1.30889	0.378568	1.9325e-06	2.03671e-05	ENSMUSG00000048138	226049	Dmrt2	doublesex and mab-3 related transcription factor 2
318.716	-0.596698	0.152196	1.97065e-06	2.0754e-05	ENSMUSG00000051515	58238	Fam181b	family with sequence similarity 181, member B
135.759	0.690191	0.182641	1.97944e-06	2.08312e-05	ENSMUSG00000055471	11682	Alk	anaplastic lymphoma kinase
21.6461	6.32872	1.64185	1.9897e-06	2.09239e-05	ENSMUSG00000021765	14313	Fst	follistatin
362.032	-0.45274	0.109445	2.0002e-06	2.1019e-05	ENSMUSG00000030092	53870	Cntn6	contactin 6
20.1546	4.29606	1.07675	2.01064e-06	2.11132e-05	ENSMUSG00000070532	78465	Ccdc190	coiled-coil domain containing 190
265.415	0.363188	0.0846707	2.03269e-06	2.13292e-05	ENSMUSG00000037965	106205	Zc3h7a	zinc finger CCCH type containing 7 A
1315.01	0.297599	0.0674219	2.05742e-06	2.15729e-05	ENSMUSG00000079215	269704	Zfp664	zinc finger protein 664
1362.37	0.371106	0.0868833	2.06327e-06	2.16184e-05	ENSMUSG00000021109	15251	Hif1a	hypoxia inducible factor 1, alpha subunit
575.882	-0.560286	0.141414	2.07908e-06	2.17682e-05	ENSMUSG00000029359	57816	Tesc	tescalcin
584.11	0.339264	0.0783637	2.08499e-06	2.18142e-05	ENSMUSG00000031169	53627	Porcn	porcupine O-acyltransferase
366.686	-0.497901	0.122774	2.08791e-06	2.18289e-05	ENSMUSG00000049097	545554	Ankrd34a	ankyrin repeat domain 34A
253.325	-0.343729	0.0795976	2.10783e-06	2.20211e-05	ENSMUSG00000021866	11744	Anxa11	annexin A11
1165.89	-0.349988	0.0813013	2.12229e-06	2.2156e-05	ENSMUSG00000020436	14406	Gabrg2	gamma-aminobutyric acid (GABA) A receptor, subunit gamma 2
22.5346	4.25971	1.07469	2.13457e-06	2.2268e-05	ENSMUSG00000078853	16145	Igtp	interferon gamma induced GTPase
894.637	0.24381	0.0540563	2.13806e-06	2.22883e-05	ENSMUSG00000032905	67526	Atg12	autophagy related 12
1438.32	0.233467	0.0515783	2.1686e-06	2.25739e-05	ENSMUSG00000021518	19210	Ptdss1	phosphatidylserine synthase 1
6.88027	-5.33424	1.34879	2.16725e-06	2.25739e-05	ENSMUSG00000030650	74424	Tmc5	transmembrane channel-like gene family 5
3872.15	0.295879	0.0671652	2.17577e-06	2.26158e-05	ENSMUSG00000029426	12492	Scarb2	scavenger receptor class B, member 2
17.804	2.55629	0.712328	2.17467e-06	2.26158e-05	ENSMUSG00000050105	72690	Fam110d	family with sequence similarity 110, member D
318.945	-0.374217	0.0879927	2.18407e-06	2.26855e-05	ENSMUSG00000039983	269336	Ccdc32	coiled-coil domain containing 32
283.529	0.337611	0.0781259	2.1934e-06	2.2766e-05	ENSMUSG00000024014	18712	Pim1	proviral integration site 1
29.5566	2.27071	0.643458	2.19963e-06	2.28143e-05	ENSMUSG00000030921	20128	Trim30a	tripartite motif-containing 30A
1000.75	0.358747	0.0838256	2.2047e-06	2.28503e-05	ENSMUSG00000062901	75785	Klhl24	kelch-like 24
435.93	0.548386	0.138365	2.22576e-06	2.30519e-05	ENSMUSG00000059742	170738	Kcnh7	potassium voltage-gated channel, subfamily H (eag-related), member 7
795.603	-0.301837	0.06879	2.23281e-06	2.31083e-05	ENSMUSG00000009731	16506	Kcnd1	potassium voltage-gated channel, Shal-related family, member 1
273.238	0.379636	0.0896035	2.243e-06	2.3197e-05	ENSMUSG00000022801	70144	Lrch3	leucine-rich repeats and calponin homology (CH) domain containing 3
2305.66	-0.181898	0.0395012	2.24786e-06	2.32306e-05	ENSMUSG00000047842	68203	Diras2	DIRAS family, GTP-binding RAS-like 2
26.3057	1.45456	0.423824	2.25668e-06	2.33049e-05	ENSMUSG00000021799	30044	Opn4	opsin 4 (melanopsin)
371.119	0.617622	0.160243	2.26407e-06	2.33645e-05	ENSMUSG00000029501	71782	Ankle2	ankyrin repeat and LEM domain containing 2
5.10683	4.6558	1.1756	2.2781e-06	2.34924e-05	ENSMUSG00000040610	27140	Tlx3	T cell leukemia, homeobox 3
444.557	-0.285665	0.0647554	2.32114e-06	2.39191e-05	ENSMUSG00000047434	268880	Xxylt1	xyloside xylosyltransferase 1
200.46	-0.496014	0.123084	2.35414e-06	2.42418e-05	ENSMUSG00000049036	69195	Tmem121	transmembrane protein 121
1658.76	-0.251711	0.056274	2.3743e-06	2.44023e-05	ENSMUSG00000002222	68477	Rmnd5a	required for meiotic nuclear division 5 homolog A
2945.76	0.388895	0.0924433	2.37653e-06	2.44023e-05	ENSMUSG00000003528	13358	Slc25a1	solute carrier family 25 (mitochondrial carrier, citrate transporter), member 1
694.553	0.356304	0.0834895	2.37574e-06	2.44023e-05	ENSMUSG00000019188	14950	H13	histocompatibility 13
490.152	-0.450605	0.109891	2.37333e-06	2.44023e-05	ENSMUSG00000038534	71240	Osbpl7	oxysterol binding protein-like 7
636.942	0.263848	0.0594226	2.47912e-06	2.54375e-05	ENSMUSG00000031446	99375	Cul4a	cullin 4A
355.847	0.675726	0.180644	2.4959e-06	2.55914e-05	ENSMUSG00000029135	14284	Fosl2	fos-like antigen 2
627.917	-0.342433	0.0799987	2.52809e-06	2.5903e-05	ENSMUSG00000025551	14169	Fgf14	fibroblast growth factor 14
67.3502	1.07825	0.319303	2.5348e-06	2.59532e-05	ENSMUSG00000018500	11541	Adora2b	adenosine A2b receptor
340.192	-0.396524	0.0949687	2.56906e-06	2.62666e-05	ENSMUSG00000029469	12589	Ift81	intraflagellar transport 81
22.5715	4.54451	1.16248	2.56865e-06	2.62666e-05	ENSMUSG00000062312	13866	Erbb2	erb-b2 receptor tyrosine kinase 2
221.624	0.488608	0.121653	2.61598e-06	2.67273e-05	ENSMUSG00000103255	353236	Pcdhac1	protocadherin alpha subfamily C, 1
1581.13	-0.220411	0.0489074	2.65854e-06	2.71428e-05	ENSMUSG00000008604	94232	Ubqln4	ubiquilin 4
2416.58	0.246862	0.0554641	2.7476e-06	2.80322e-05	ENSMUSG00000041548	80888	Hspb8	heat shock protein 8
574.541	0.306712	0.0708566	2.79768e-06	2.85229e-05	ENSMUSG00000032724	99382	Abtb2	ankyrin repeat and BTB (POZ) domain containing 2
20097.4	-0.313462	0.0726989	2.84045e-06	2.89384e-05	ENSMUSG00000015222	17756	Map2	microtubule-associated protein 2
2721.05	0.259909	0.0588293	2.84629e-06	2.89772e-05	ENSMUSG00000020741	74148	Cluh	clustered mitochondria (cluA/CLU1) homolog
278.774	0.478725	0.119444	2.89559e-06	2.94584e-05	ENSMUSG00000025532	12909	Crcp	calcitonin gene-related peptide-receptor component protein
360.007	0.384199	0.092127	2.89801e-06	2.94621e-05	ENSMUSG00000030341	21937	Tnfrsf1a	tumor necrosis factor receptor superfamily, member 1a
474.385	-0.449267	0.110816	2.91992e-06	2.96639e-05	ENSMUSG00000042724	338372	Map3k9	mitogen-activated protein kinase kinase kinase 9
1454.23	0.200492	0.044351	2.92361e-06	2.96803e-05	ENSMUSG00000032606	66257	Nicn1	nicolin 1
7066.18	0.198361	0.0438718	2.96067e-06	3.00353e-05	ENSMUSG00000062661	14299	Ncs1	neuronal calcium sensor 1
21.0992	1.96223	0.579068	2.97012e-06	3.01099e-05	ENSMUSG00000040616	214359	Tmem51	transmembrane protein 51
1708.19	-0.21664	0.048259	2.97883e-06	3.0177e-05	ENSMUSG00000031558	20563	Slit2	slit guidance ligand 2
828.508	0.232203	0.0520698	3.0007e-06	3.03771e-05	ENSMUSG00000021054	81535	Sgpp1	sphingosine-1-phosphate phosphatase 1
3447.65	0.193907	0.0428536	3.01258e-06	3.04759e-05	ENSMUSG00000056050	338366	Mia3	MIA SH3 domain ER export factor 3
743.467	-0.329469	0.077249	3.03661e-06	3.06973e-05	ENSMUSG00000038990	252966	Cables2	CDK5 and Abl enzyme substrate 2
4182.11	-0.268548	0.0612279	3.04935e-06	3.08044e-05	ENSMUSG00000028756	68943	Pink1	PTEN induced putative kinase 1
41.1522	0.925392	0.273152	3.0868e-06	3.11609e-05	ENSMUSG00000073077	636104	Cfap47	cilia and flagella associated protein 47
948.984	-0.276714	0.0634922	3.21443e-06	3.24265e-05	ENSMUSG00000015342	22439	Xk	X-linked Kx blood group
2073.44	0.372717	0.0894472	3.23185e-06	3.25793e-05	ENSMUSG00000059923	14784	Grb2	growth factor receptor bound protein 2
5320.16	0.283485	0.0652709	3.23573e-06	3.25956e-05	ENSMUSG00000030729	70974	Pgm2l1	phosphoglucomutase 2-like 1
80.5472	1.34395	0.408577	3.42612e-06	3.44892e-05	ENSMUSG00000003559	57344	As3mt	arsenite methyltransferase
2321.66	0.232799	0.0525919	3.47762e-06	3.49832e-05	ENSMUSG00000066232	233726	Ipo7	importin 7
263.801	-0.852805	0.249672	3.49767e-06	3.51357e-05	ENSMUSG00000031137	14168	Fgf13	fibroblast growth factor 13
284.798	-0.394165	0.0959352	3.4976e-06	3.51357e-05	ENSMUSG00000048826	240025	Dact2	dishevelled-binding antagonist of beta-catenin 2
620.565	0.280049	0.0646897	3.55929e-06	3.57297e-05	ENSMUSG00000056493	17425	Foxk1	forkhead box K1
81.8393	0.973372	0.293497	3.59038e-06	3.60166e-05	ENSMUSG00000051652	237387	Lrrc3	leucine rich repeat containing 3
846.68	0.348693	0.0832489	3.60175e-06	3.61054e-05	ENSMUSG00000025137	68671	Pcyt2	phosphate cytidylyltransferase 2, ethanolamine
2722.76	0.316106	0.074319	3.60469e-06	3.61098e-05	ENSMUSG00000021756	16195	Il6st	interleukin 6 signal transducer
1278.61	-0.228793	0.0516928	3.60751e-06	3.61128e-05	ENSMUSG00000014763	67544	Fam120b	family with sequence similarity 120, member B
224.262	0.582604	0.153789	3.63546e-06	3.63672e-05	ENSMUSG00000047963	52331	Stbd1	starch binding domain 1
1231.94	-0.331896	0.0786659	3.64636e-06	3.64509e-05	ENSMUSG00000013367	210094	Iglon5	IgLON family member 5
1658.93	-0.272692	0.0629194	3.72285e-06	3.71897e-05	ENSMUSG00000110185	109169	Igip	IgA inducing protein
214.517	0.501015	0.128109	3.73178e-06	3.7253e-05	ENSMUSG00000018809	319822	Smyd4	SET and MYND domain containing 4
4199.23	-0.269994	0.062233	3.739e-06	3.72991e-05	ENSMUSG00000029674	16885	Limk1	LIM-domain containing, protein kinase
104.303	-0.837579	0.245414	3.74305e-06	3.73136e-05	ENSMUSG00000024339	21355	Tap2	transporter 2, ATP-binding cassette, sub-family B (MDR/TAP)
28.3341	1.21774	0.374177	3.74733e-06	3.73304e-05	ENSMUSG00000030677	110033	Kif22	kinesin family member 22
658.105	0.430387	0.10687	3.75374e-06	3.73683e-05	ENSMUSG00000024558	225724	Mapk4	mitogen-activated protein kinase 4
647.169	-0.247142	0.0564562	3.84179e-06	3.82184e-05	ENSMUSG00000022280	30945	Rnf19a	ring finger protein 19A
478.034	0.500198	0.128176	3.88319e-06	3.86035e-05	ENSMUSG00000033105	16987	Lss	lanosterol synthase
263.122	-0.432583	0.107949	4.01707e-06	3.99068e-05	ENSMUSG00000020393	84035	Kremen1	kringle containing transmembrane protein 1
545.564	0.304464	0.0716089	4.03327e-06	4.004e-05	ENSMUSG00000029310	74167	Nudt9	nudix (nucleoside diphosphate linked moiety X)-type motif 9
89.4794	-0.679998	0.188608	4.06017e-06	4.02793e-05	ENSMUSG00000052135	329934	Foxo6	forkhead box O6
214.779	0.967101	0.294503	4.08152e-06	4.04631e-05	ENSMUSG00000027737	26570	Slc7a11	solute carrier family 7 (cationic amino acid transporter, y+ system), member 11
447.593	-0.389133	0.0953379	4.09058e-06	4.05249e-05	ENSMUSG00000034327	105440	Kctd9	potassium channel tetramerisation domain containing 9
17.9328	2.59378	0.771109	4.17668e-06	4.13494e-05	ENSMUSG00000010358	70110	Ifi35	interferon-induced protein 35
3141.36	-0.228842	0.052092	4.19732e-06	4.15251e-05	ENSMUSG00000040722	56807	Scamp5	secretory carrier membrane protein 5
336.799	-0.351132	0.0846432	4.20504e-06	4.15729e-05	ENSMUSG00000031155	18715	Pim2	proviral integration site 2
618.354	-0.412533	0.102329	4.21718e-06	4.16537e-05	ENSMUSG00000023973	72029	Cnpy3	canopy FGF signaling regulator 3
302.329	-0.362668	0.0879196	4.21901e-06	4.16537e-05	ENSMUSG00000074918	100043272	Inafm2	InaF motif containing 2
1397.18	-0.153018	0.033934	4.26691e-06	4.20977e-05	ENSMUSG00000005981	68015	Trap1	TNF receptor-associated protein 1
33026.1	-0.194293	0.0436866	4.31528e-06	4.25457e-05	ENSMUSG00000029309	13602	Sparcl1	SPARC-like 1
113.621	-0.553935	0.146353	4.40461e-06	4.33966e-05	ENSMUSG00000034768	217217	Asb16	ankyrin repeat and SOCS box-containing 16
71.2789	0.697455	0.19626	4.44419e-06	4.37566e-05	ENSMUSG00000026058	170771	Khdrbs2	KH domain containing, RNA binding, signal transduction associated 2
34.0222	1.3206	0.412469	4.51269e-06	4.44005e-05	ENSMUSG00000040152	21825	Thbs1	thrombospondin 1
520.009	0.424291	0.10625	4.53067e-06	4.45469e-05	ENSMUSG00000021193	69617	Pitrm1	pitrilysin metallepetidase 1
662.217	-0.306483	0.0726271	4.56117e-06	4.48161e-05	ENSMUSG00000078235	625638	Fam43b	family with sequence similarity 43, member B
158.44	-0.441495	0.111524	4.61171e-06	4.52818e-05	ENSMUSG00000054196	68588	Cthrc1	collagen triple helix repeat containing 1
115.76	-0.526571	0.138024	4.65174e-06	4.56436e-05	ENSMUSG00000020143	94176	Dock2	dedicator of cyto-kinesis 2
583.758	0.283919	0.066684	4.73669e-06	4.64455e-05	ENSMUSG00000047181	217125	Samd14	sterile alpha motif domain containing 14
505.97	-0.313271	0.0746456	4.75174e-06	4.65346e-05	ENSMUSG00000019853	56016	Hebp2	heme binding protein 2
266.556	0.484165	0.124816	4.75226e-06	4.65346e-05	ENSMUSG00000041891	70361	Lman1	lectin, mannose-binding, 1
1505.19	0.27151	0.0634366	4.79918e-06	4.6962e-05	ENSMUSG00000070934	68441	Rraga	Ras-related GTP binding A
209.587	-0.483723	0.124826	4.84182e-06	4.73148e-05	ENSMUSG00000031497	24099	Tnfsf13b	tumor necrosis factor (ligand) superfamily, member 13b
1925.88	-0.302704	0.071829	4.84108e-06	4.73148e-05	ENSMUSG00000031790	17388	Mmp15	matrix metallopeptidase 15
16.2141	-15.4008	5.55247	4.86834e-06	4.75416e-05	ENSMUSG00000000530	11482	Acvrl1	activin A receptor, type II-like 1
251.681	-0.571015	0.153022	4.873e-06	4.75548e-05	ENSMUSG00000033170	105844	Card10	caspase recruitment domain family, member 10
565.021	-0.277516	0.0650921	4.89395e-06	4.77268e-05	ENSMUSG00000044452	668501	Zfp507	zinc finger protein 507
353.13	0.376953	0.0928281	4.93816e-06	4.81051e-05	ENSMUSG00000025899	67667	Alkbh8	alkB homolog 8, tRNA methyltransferase
64.5211	-0.649681	0.18043	4.93943e-06	4.81051e-05	ENSMUSG00000055676	NA	NA	NA
1375.05	-0.226043	0.051817	4.94623e-06	4.81386e-05	ENSMUSG00000030878	12585	Cdr2	cerebellar degeneration-related 2
452.238	-0.368761	0.0905052	4.98397e-06	4.84731e-05	ENSMUSG00000036941	114615	Elac1	elaC ribonuclease Z 1
2877.39	-0.395779	0.0983988	4.99732e-06	4.857e-05	ENSMUSG00000034557	230597	Zfyve9	zinc finger, FYVE domain containing 9
378.312	0.406755	0.101667	5.01698e-06	4.87282e-05	ENSMUSG00000041915	225339	Ammecr1l	AMME chromosomal region gene 1-like
395.544	0.39865	0.0992855	5.03209e-06	4.88418e-05	ENSMUSG00000033964	226470	Zbtb41	zinc finger and BTB domain containing 41
1195.9	-0.282153	0.0664801	5.11191e-06	4.95831e-05	ENSMUSG00000046574	233210	Prr12	proline rich 12
193.783	0.471265	0.121401	5.12897e-06	4.9715e-05	ENSMUSG00000024594	73137	Prrc1	proline-rich coiled-coil 1
636.63	-0.374087	0.0922933	5.22145e-06	5.05773e-05	ENSMUSG00000018470	16499	Kcnab3	potassium voltage-gated channel, shaker-related subfamily, beta member 3
314.996	0.58342	0.158064	5.27172e-06	5.10299e-05	ENSMUSG00000035236	320271	Scai	suppressor of cancer cell invasion
7420.37	0.294485	0.0699314	5.29067e-06	5.11788e-05	ENSMUSG00000055022	12805	Cntn1	contactin 1
1835.84	-0.247103	0.0573883	5.32291e-06	5.1456e-05	ENSMUSG00000025609	27418	Mkln1	muskelin 1, intracellular mediator containing kelch motifs
302.198	-0.345227	0.0841009	5.34322e-06	5.16176e-05	ENSMUSG00000026495	68226	Efcab2	EF-hand calcium binding domain 2
168.734	-0.555379	0.148777	5.34716e-06	5.16209e-05	ENSMUSG00000061315	17938	Naca	nascent polypeptide-associated complex alpha polypeptide
416.314	-0.377622	0.0934885	5.38299e-06	5.19319e-05	ENSMUSG00000028701	68075	Lurap1	leucine rich adaptor protein 1
139.553	0.50198	0.131483	5.39978e-06	5.2059e-05	ENSMUSG00000022656	58998	Nectin3	nectin cell adhesion molecule 3
28.01	-5.53524	1.57406	5.45105e-06	5.2518e-05	ENSMUSG00000024299	224697	Adamts10	a disintegrin-like and metallopeptidase (reprolysin type) with thrombospondin type 1 motif, 10
1277.69	-0.168745	0.0380423	5.455e-06	5.25208e-05	ENSMUSG00000027796	55994	Smad9	SMAD family member 9
5.99243	2.75489	0.8365	5.50811e-06	5.29966e-05	ENSMUSG00000037106	631797	Fer1l6	fer-1-like 6 (C. elegans)
511.079	0.344477	0.0840408	5.51902e-06	5.3066e-05	ENSMUSG00000025132	192662	Arhgdia	Rho GDP dissociation inhibitor (GDI) alpha
122.12	-0.579576	0.157293	5.53203e-06	5.31556e-05	ENSMUSG00000096606	100503386	Tpbgl	trophoblast glycoprotein-like
504.941	0.228537	0.0528237	5.70025e-06	5.47061e-05	ENSMUSG00000002032	71687	Tmem25	transmembrane protein 25
304.789	-0.341399	0.0833166	5.70102e-06	5.47061e-05	ENSMUSG00000053334	231630	Ficd	FIC domain containing
79.5621	7.2089	2.27117	5.92643e-06	5.68312e-05	ENSMUSG00000020953	12810	Coch	cochlin
17.7884	-4.62722	1.30773	5.95491e-06	5.70663e-05	ENSMUSG00000042320	73422	Prox2	prospero homeobox 2
192.902	0.444624	0.114315	6.00075e-06	5.74672e-05	ENSMUSG00000030471	243983	Zdhhc13	zinc finger, DHHC domain containing 13
142.131	0.468555	0.121843	6.0559e-06	5.79567e-05	ENSMUSG00000040822	58248	1700123O20Rik	RIKEN cDNA 1700123O20 gene
3843.63	-0.219624	0.0507526	6.11816e-06	5.84456e-05	ENSMUSG00000009075	192650	Cabp7	calcium binding protein 7
1293.86	-0.221508	0.0512295	6.11919e-06	5.84456e-05	ENSMUSG00000020277	18641	Pfkl	phosphofructokinase, liver, B-type
1028.15	-0.295812	0.0708479	6.11678e-06	5.84456e-05	ENSMUSG00000044502	69556	Bod1	biorientation of chromosomes in cell division 1
1451.36	-0.255883	0.0601534	6.21225e-06	5.9295e-05	ENSMUSG00000022472	28075	Desi1	desumoylating isopeptidase 1
666.071	-0.397255	0.100202	6.29362e-06	6.00318e-05	ENSMUSG00000017692	246104	Rhbdl3	rhomboid like 3
1441.04	-0.296749	0.0712361	6.32542e-06	6.0295e-05	ENSMUSG00000062604	20817	Srpk2	serine/arginine-rich protein specific kinase 2
1664.55	-0.173698	0.0395177	6.3551e-06	6.05378e-05	ENSMUSG00000069237	97863	Fam8a1	family with sequence similarity 8, member A1
356.733	-0.378758	0.0948522	6.48096e-06	6.16958e-05	ENSMUSG00000027185	98956	Nat10	N-acetyltransferase 10
238.69	-0.466364	0.121711	6.50163e-06	6.18107e-05	ENSMUSG00000047606	330998	Ankrd34c	ankyrin repeat domain 34C
75.5137	4.57718	1.3094	6.50139e-06	6.18107e-05	ENSMUSG00000055027	12180	Smyd1	SET and MYND domain containing 1
465.871	-0.331852	0.0812235	6.52665e-06	6.20075e-05	ENSMUSG00000027227	20322	Sord	sorbitol dehydrogenase
157.101	-0.582967	0.160468	6.59095e-06	6.2577e-05	ENSMUSG00000039179	70426	Tekt5	tektin 5
1459.57	-0.284869	0.0681516	6.62277e-06	6.28376e-05	ENSMUSG00000047037	233280	Nipa1	non imprinted in Prader-Willi/Angelman syndrome 1 homolog (human)
138.95	-0.577547	0.158707	6.66192e-06	6.31673e-05	ENSMUSG00000020175	76877	Rab36	RAB36, member RAS oncogene family
231.511	0.370798	0.0927529	6.78991e-06	6.43384e-05	ENSMUSG00000029545	11409	Acads	acyl-Coenzyme A dehydrogenase, short chain
574.627	0.707435	0.207012	6.87309e-06	6.50837e-05	ENSMUSG00000026247	13599	Ecel1	endothelin converting enzyme-like 1
9132.12	0.222157	0.0517154	6.90703e-06	6.5362e-05	ENSMUSG00000022594	23936	Lynx1	Ly6/neurotoxin 1
2815.41	-0.177611	0.0406338	6.91955e-06	6.54374e-05	ENSMUSG00000034613	319468	Ppm1h	protein phosphatase 1H (PP2C domain containing)
1284.79	0.297512	0.0718195	6.95059e-06	6.56686e-05	ENSMUSG00000003033	11767	Ap1m1	adaptor-related protein complex AP-1, mu subunit 1
653.075	0.255411	0.0603888	6.95314e-06	6.56686e-05	ENSMUSG00000062963	66155	Ufc1	ubiquitin-fold modifier conjugating enzyme 1
1216.62	0.304322	0.0737228	6.96087e-06	6.56984e-05	ENSMUSG00000040037	320840	Negr1	neuronal growth regulator 1
19.2069	1.37619	0.449214	6.97038e-06	6.5745e-05	ENSMUSG00000092009	667772	Myh15	myosin, heavy chain 15
191.275	0.835656	0.258069	6.99813e-06	6.59634e-05	ENSMUSG00000050721	102595	Plekho2	pleckstrin homology domain containing, family O member 2
52.5488	-0.927404	0.294146	7.03854e-06	6.63007e-05	ENSMUSG00000030606	67666	Hapln3	hyaluronan and proteoglycan link protein 3
755.502	0.522892	0.140786	7.08444e-06	6.66021e-05	ENSMUSG00000020176	14783	Grb10	growth factor receptor bound protein 10
983.787	-0.305613	0.0741522	7.07609e-06	6.66021e-05	ENSMUSG00000029394	13445	Cdk2ap1	CDK2 (cyclin-dependent kinase 2)-associated protein 1
576.115	-0.321644	0.0786836	7.08126e-06	6.66021e-05	ENSMUSG00000042572	70093	Ube2q1	ubiquitin-conjugating enzyme E2Q family member 1
307.216	-0.510795	0.13681	7.10643e-06	6.67652e-05	ENSMUSG00000049985	77318	Ankrd55	ankyrin repeat domain 55
322.985	-0.603752	0.168761	7.12153e-06	6.68632e-05	ENSMUSG00000085925	353326	Rtl1	retrotransposon Gaglike 1
1357.07	-0.254577	0.0602563	7.14698e-06	6.70584e-05	ENSMUSG00000039463	77031	Slc9a8	solute carrier family 9 (sodium/hydrogen exchanger), member 8
12402	0.196206	0.0452971	7.23468e-06	6.78369e-05	ENSMUSG00000032011	21838	Thy1	thymus cell antigen 1, theta
1206.1	-0.199827	0.0462217	7.30608e-06	6.84618e-05	ENSMUSG00000020949	30795	Fkbp3	FK506 binding protein 3
3498.63	-0.148215	0.0336915	7.31864e-06	6.85347e-05	ENSMUSG00000041236	218035	Vps41	VPS41 HOPS complex subunit
4182.28	0.206078	0.0477972	7.33489e-06	6.86399e-05	ENSMUSG00000027030	53416	Stk39	serine/threonine kinase 39
1311.59	0.401303	0.102376	7.33943e-06	6.86399e-05	ENSMUSG00000061981	14252	Flot2	flotillin 2
1323.82	-0.190762	0.0440129	7.44474e-06	6.95795e-05	ENSMUSG00000025417	117150	Pip4k2c	phosphatidylinositol-5-phosphate 4-kinase, type II, gamma
206.848	0.46548	0.12257	7.4997e-06	7.00476e-05	ENSMUSG00000037353	68614	Letmd1	LETM1 domain containing 1
54.2662	-0.729092	0.217183	7.55735e-06	7.05402e-05	ENSMUSG00000001604	21401	Tcea3	transcription elongation factor A (SII), 3
89.2455	-1.06516	0.347894	7.61544e-06	7.10362e-05	ENSMUSG00000032556	107993	Bfsp2	beaded filament structural protein 2, phakinin
1225.27	0.302593	0.073647	7.68424e-06	7.16315e-05	ENSMUSG00000017428	69077	Psmd11	proteasome (prosome, macropain) 26S subunit, non-ATPase, 11
108.722	0.557913	0.153657	7.7784e-06	7.24622e-05	ENSMUSG00000042647	338350	Acad12	acyl-Coenzyme A dehydrogenase family, member 12
257.287	0.487717	0.130178	7.88098e-06	7.33703e-05	ENSMUSG00000032038	20443	St3gal4	ST3 beta-galactoside alpha-2,3-sialyltransferase 4
54.9844	0.745105	0.224404	7.90071e-06	7.35063e-05	ENSMUSG00000043895	14739	S1pr2	sphingosine-1-phosphate receptor 2
568.873	-0.23738	0.0560614	7.97982e-06	7.41943e-05	ENSMUSG00000039253	238024	Fn3krp	fructosamine 3 kinase related protein
691.164	-0.2195	0.0514345	8.01214e-06	7.44466e-05	ENSMUSG00000067873	72459	Htatsf1	HIV TAT specific factor 1
1284.91	-0.178176	0.0410819	8.04273e-06	7.46343e-05	ENSMUSG00000031617	234463	Tmem184c	transmembrane protein 184C
1630.89	-0.164486	0.0377498	8.03837e-06	7.46343e-05	ENSMUSG00000049106	320808	Dcaf5	DDB1 and CUL4 associated factor 5
97.5398	1.47888	0.49035	8.06097e-06	7.47553e-05	ENSMUSG00000035168	66860	Tanc1	tetratricopeptide repeat, ankyrin repeat and coiled-coil containing 1
952.486	0.214146	0.0501797	8.37184e-06	7.75881e-05	ENSMUSG00000020196	104248	Cabin1	calcineurin binding protein 1
2823.08	0.210084	0.0491496	8.39319e-06	7.77357e-05	ENSMUSG00000020671	19325	Rab10	RAB10, member RAS oncogene family
349.695	-0.282903	0.0685206	8.42847e-06	7.80123e-05	ENSMUSG00000041777	66935	Cir1	corepressor interacting with RBPJ, 1
244.75	-0.323965	0.0801902	8.51069e-06	7.87225e-05	ENSMUSG00000038879	223473	Nipal2	NIPA-like domain containing 2
4412.8	0.190876	0.0443764	8.63071e-06	7.97813e-05	ENSMUSG00000031529	21951	Tnks	tankyrase, TRF1-interacting ankyrin-related ADP-ribose polymerase
182.981	0.411624	0.106762	8.81729e-06	8.14536e-05	ENSMUSG00000039886	215210	Tmem120a	transmembrane protein 120A
5023.51	0.327394	0.081355	8.82372e-06	8.14607e-05	ENSMUSG00000021700	67295	Rab3c	RAB3C, member RAS oncogene family
54.9406	0.978083	0.320449	8.87695e-06	8.18994e-05	ENSMUSG00000032502	20840	Stac	src homology three (SH3) and cysteine rich domain
2060.49	0.254535	0.0610122	9.02881e-06	8.3247e-05	ENSMUSG00000062234	231580	Gak	cyclin G associated kinase
1589.23	-0.355094	0.0896768	9.09108e-06	8.37674e-05	ENSMUSG00000046157	268567	Tmem229b	transmembrane protein 229B
185.635	0.499446	0.13544	9.16496e-06	8.4394e-05	ENSMUSG00000022076	93688	Klhl1	kelch-like 1
920.719	-0.296428	0.0726724	9.23558e-06	8.49898e-05	ENSMUSG00000022389	21685	Tef	thyrotroph embryonic factor
5880.47	-0.156814	0.0361648	9.28095e-06	8.53527e-05	ENSMUSG00000058230	232906	Arhgap35	Rho GTPase activating protein 35
174384	-0.487229	0.131579	9.37788e-06	8.61889e-05	ENSMUSG00000022054	18040	Nefm	neurofilament, medium polypeptide
182.541	-0.77494	0.240085	9.39122e-06	8.62563e-05	ENSMUSG00000060780	74342	Lrrtm1	leucine rich repeat transmembrane neuronal 1
704.001	-0.257722	0.0620451	9.49548e-06	8.71582e-05	ENSMUSG00000035329	70611	Fbxo33	F-box protein 33
132.713	-0.660976	0.194359	9.51951e-06	8.73229e-05	ENSMUSG00000017631	109934	Abr	active BCR-related gene
201.029	-1.30715	0.441596	9.52798e-06	8.73449e-05	ENSMUSG00000030513	18553	Pcsk6	proprotein convertase subtilisin/kexin type 6
575.212	-0.344192	0.0866844	9.54119e-06	8.74102e-05	ENSMUSG00000047787	396184	Flrt1	fibronectin leucine rich transmembrane protein 1
914.23	0.310556	0.0768719	9.60013e-06	8.78942e-05	ENSMUSG00000036985	208884	Zdhhc9	zinc finger, DHHC domain containing 9
166.214	0.939821	0.307973	9.62622e-06	8.80768e-05	ENSMUSG00000015839	18024	Nfe2l2	nuclear factor, erythroid derived 2, like 2
83.803	-0.526738	0.145261	9.68141e-06	8.85254e-05	ENSMUSG00000025789	20450	St8sia2	ST8 alpha-N-acetyl-neuraminide alpha-2,8-sialyltransferase 2
388.997	-0.479657	0.129519	9.85936e-06	9.00952e-05	ENSMUSG00000030518	70638	Fam189a1	family with sequence similarity 189, member A1
53.8742	0.690625	0.206724	9.88277e-06	9.02518e-05	ENSMUSG00000052419	66520	Smim30	small integral membrane protein 30
132.254	0.99046	0.328854	9.93195e-06	9.06433e-05	ENSMUSG00000043557	74762	Mdga1	MAM domain containing glycosylphosphatidylinositol anchor 1
1801.27	-0.242418	0.0581664	1.02379e-05	9.33758e-05	ENSMUSG00000038319	16511	Kcnh2	potassium voltage-gated channel, subfamily H (eag-related), member 2
74.7101	-0.643718	0.189102	1.04347e-05	9.50502e-05	ENSMUSG00000038692	15412	Hoxb4	homeobox B4
474.987	-0.468623	0.126365	1.04346e-05	9.50502e-05	ENSMUSG00000059273	330474	Zc3h4	zinc finger CCCH-type containing 4
76.6028	-0.643321	0.189598	1.08727e-05	9.8977e-05	ENSMUSG00000024873	12794	Cnih2	cornichon family AMPA receptor auxiliary protein 2
77.9256	4.06063	1.2648	1.10451e-05	0.000100455	ENSMUSG00000006386	21687	Tek	TEK receptor tyrosine kinase
142.418	0.551656	0.155494	1.1049e-05	0.000100455	ENSMUSG00000021474	14057	Sfxn1	sideroflexin 1
993.97	-0.352751	0.0900804	1.11242e-05	0.000101074	ENSMUSG00000037348	71904	Paqr7	progestin and adipoQ receptor family member VII
897.453	-0.211471	0.0502846	1.12671e-05	0.000102308	ENSMUSG00000047030	263876	Spata2	spermatogenesis associated 2
957.732	0.23401	0.0562329	1.13186e-05	0.000102711	ENSMUSG00000028469	230103	Npr2	natriuretic peptide receptor 2
111.231	0.481862	0.131686	1.15242e-05	0.000104474	ENSMUSG00000026999	69482	Nup35	nucleoporin 35
210.424	-0.67142	0.201736	1.15334e-05	0.000104474	ENSMUSG00000028411	66408	Aptx	aprataxin
1253.54	0.265528	0.0648803	1.15347e-05	0.000104474	ENSMUSG00000037876	108829	Jmjd1c	jumonji domain containing 1C
101.928	0.552132	0.156359	1.1711e-05	0.000106004	ENSMUSG00000040795	230767	Iqcc	IQ motif containing C
537.548	-0.257813	0.0628186	1.17669e-05	0.000106443	ENSMUSG00000062169	98417	Cnih4	cornichon family AMPA receptor auxiliary protein 4
744.513	-0.254897	0.0620458	1.1865e-05	0.000107263	ENSMUSG00000042082	11881	Arsb	arylsulfatase B
99.5772	-0.586449	0.169143	1.18787e-05	0.000107319	ENSMUSG00000050592	241303	Fam78a	family with sequence similarity 78, member A
1363.9	-0.374745	0.097255	1.19541e-05	0.000107933	ENSMUSG00000009394	20965	Syn2	synapsin II
5178.39	0.209281	0.0498835	1.19881e-05	0.000108172	ENSMUSG00000029104	15194	Htt	huntingtin
124.226	0.50136	0.138767	1.20434e-05	0.000108602	ENSMUSG00000028191	12042	Bcl10	B cell leukemia/lymphoma 10
1107.79	0.260096	0.0635449	1.20861e-05	0.000108862	ENSMUSG00000033047	223691	Eif3l	eukaryotic translation initiation factor 3, subunit L
215.389	0.380185	0.0990204	1.20874e-05	0.000108862	ENSMUSG00000039737	66801	Prkrip1	Prkr interacting protein 1 (IL11 inducible)
301.82	-0.291449	0.072393	1.21133e-05	0.000109027	ENSMUSG00000001962	108160	Fam50a	family with sequence similarity 50, member A
10774.6	-0.227498	0.0547896	1.24574e-05	0.000112054	ENSMUSG00000047976	16485	Kcna1	potassium voltage-gated channel, shaker-related subfamily, member 1
204.492	-0.398977	0.105167	1.24925e-05	0.000112299	ENSMUSG00000048706	52829	Lurap1l	leucine rich adaptor protein 1-like
489.854	-0.328262	0.0833331	1.25134e-05	0.000112354	ENSMUSG00000005225	231999	Plekha8	pleckstrin homology domain containing, family A (phosphoinositide binding specific) member 8
477.702	0.255081	0.0622856	1.252e-05	0.000112354	ENSMUSG00000029415	231452	Sdad1	SDA1 domain containing 1
3209.96	0.312867	0.0787682	1.2522e-05	0.000112354	ENSMUSG00000030306	387314	Tmtc1	transmembrane and tetratricopeptide repeat containing 1
238.421	-0.328412	0.0834185	1.26133e-05	0.000113103	ENSMUSG00000032308	71742	Ulk3	unc-51-like kinase 3
3355.32	-0.280721	0.0695003	1.26279e-05	0.000113163	ENSMUSG00000009090	11764	Ap1b1	adaptor protein complex AP-1, beta 1 subunit
150.283	-0.873453	0.288875	1.26613e-05	0.000113391	ENSMUSG00000062372	83762	Otof	otoferlin
404.827	-0.444522	0.120111	1.27656e-05	0.000114254	ENSMUSG00000021830	70561	Txndc16	thioredoxin domain containing 16
116.095	0.578757	0.167258	1.27864e-05	0.000114369	ENSMUSG00000040511	52118	Pvr	poliovirus receptor
163.753	-0.392432	0.103261	1.28154e-05	0.000114557	ENSMUSG00000074519	626848	Zfp971	zinc finger protein 971
1099.73	-0.233968	0.0566183	1.28473e-05	0.00011477	ENSMUSG00000078794	629378	Dact3	dishevelled-binding antagonist of beta-catenin 3
624.008	0.273472	0.0675196	1.28636e-05	0.000114845	ENSMUSG00000032383	19035	Ppib	peptidylprolyl isomerase B
960.673	-0.293464	0.0732559	1.29379e-05	0.000115437	ENSMUSG00000075702	114679	Selenom	selenoprotein M
1078.46	-0.378405	0.0989724	1.30933e-05	0.000116751	ENSMUSG00000020297	18197	Nsg2	neuron specific gene family member 2
3144.16	0.245804	0.0600812	1.38398e-05	0.000123331	ENSMUSG00000032244	14155	Fem1b	fem 1 homolog b
602.462	0.367481	0.0959626	1.39883e-05	0.000124576	ENSMUSG00000024515	17128	Smad4	SMAD family member 4
2129.86	-0.230819	0.0560805	1.41768e-05	0.000126177	ENSMUSG00000041608	215446	Entpd3	ectonucleoside triphosphate diphosphohydrolase 3
369.395	-0.47247	0.130499	1.42692e-05	0.000126921	ENSMUSG00000029088	80334	Kcnip4	Kv channel interacting protein 4
653.669	-0.300908	0.0759146	1.44377e-05	0.00012834	ENSMUSG00000046096	233812	Mosmo	modulator of smoothened
285.531	0.281167	0.07021	1.45519e-05	0.000129275	ENSMUSG00000043987	214552	Cep164	centrosomal protein 164
53.5246	4.72854	1.54425	1.45628e-05	0.000129292	ENSMUSG00000026288	16331	Inpp5d	inositol polyphosphate-5-phosphatase D
1130.07	-0.486468	0.135679	1.47918e-05	0.000131163	ENSMUSG00000024921	67155	Smarca2	SWI/SNF related, matrix associated, actin dependent regulator of chromatin, subfamily a, member 2
511.514	-0.308268	0.0781997	1.47866e-05	0.000131163	ENSMUSG00000038602	215085	Slc35f1	solute carrier family 35, member F1
1813.36	-0.227188	0.0552431	1.48344e-05	0.00013146	ENSMUSG00000042078	68666	Svop	SV2 related protein
221.631	-0.50648	0.142795	1.49182e-05	0.000132121	ENSMUSG00000030551	11819	Nr2f2	nuclear receptor subfamily 2, group F, member 2
726.104	0.525941	0.149901	1.50993e-05	0.000133643	ENSMUSG00000006356	68337	Crip2	cysteine rich protein 2
575.73	0.389671	0.103551	1.52129e-05	0.000134565	ENSMUSG00000028228	70568	Cpne3	copine III
475.527	0.390021	0.103748	1.54002e-05	0.000136137	ENSMUSG00000034110	212919	Kctd7	potassium channel tetramerisation domain containing 7
962.686	0.46471	0.128599	1.54684e-05	0.000136656	ENSMUSG00000025582	18164	Nptx1	neuronal pentraxin 1
693.962	-0.223899	0.0544971	1.55203e-05	0.000137031	ENSMUSG00000052962	66223	Mrpl35	mitochondrial ribosomal protein L35
353.576	-0.291524	0.0734978	1.5548e-05	0.000137191	ENSMUSG00000035772	118451	Mrps2	mitochondrial ribosomal protein S2
2669.56	0.177857	0.0424807	1.57569e-05	0.000138949	ENSMUSG00000029840	14489	Mtpn	myotrophin
114.12	-0.497828	0.140339	1.57916e-05	0.00013917	ENSMUSG00000032313	244886	Tmem266	transmembrane protein 266
636.802	-0.298696	0.0757183	1.594e-05	0.000140391	ENSMUSG00000032714	71709	Syde1	synapse defective 1, Rho GTPase, homolog 1 (C. elegans)
169.844	0.410994	0.110847	1.59941e-05	0.000140781	ENSMUSG00000035397	118445	Klf16	Kruppel-like factor 16
775.078	0.243704	0.0600289	1.6126e-05	0.000141855	ENSMUSG00000031400	14381	G6pdx	glucose-6-phosphate dehydrogenase X-linked
17.2987	1.40724	0.507685	1.61603e-05	0.00014207	ENSMUSG00000074340	12659	Ovgp1	oviductal glycoprotein 1
23.9764	1.25475	0.451053	1.63771e-05	0.000143888	ENSMUSG00000078453	73112	Abracl	ABRA C-terminal like
715.978	0.211652	0.0514377	1.67111e-05	0.000146733	ENSMUSG00000036270	234699	Edc4	enhancer of mRNA decapping 4
236.617	0.634177	0.193276	1.69392e-05	0.000148645	ENSMUSG00000015766	13860	Eps8	epidermal growth factor receptor pathway substrate 8
2564.72	-0.23522	0.0578878	1.70978e-05	0.000149945	ENSMUSG00000024472	70640	Dcp2	decapping mRNA 2
159.849	0.463597	0.129239	1.72444e-05	0.000151139	ENSMUSG00000027639	56045	Samhd1	SAM domain and HD domain, 1
622.598	-0.436639	0.120017	1.726e-05	0.000151183	ENSMUSG00000032177	18577	Pde4a	phosphodiesterase 4A, cAMP specific
392.098	0.477966	0.134263	1.72713e-05	0.00015119	ENSMUSG00000037031	70423	Tspan15	tetraspanin 15
1136.23	0.37828	0.100769	1.73102e-05	0.000151438	ENSMUSG00000022533	224088	Atp13a3	ATPase type 13A3
1314.74	-0.268821	0.0673903	1.73822e-05	0.000151975	ENSMUSG00000049612	18377	Omg	oligodendrocyte myelin glycoprotein
311.425	-0.365188	0.0966249	1.74371e-05	0.000152363	ENSMUSG00000038880	79044	Mrps34	mitochondrial ribosomal protein S34
2197.08	0.174187	0.0417969	1.75823e-05	0.000153538	ENSMUSG00000029152	68095	Ociad1	OCIA domain containing 1
150.491	-0.461318	0.128691	1.76904e-05	0.000154388	ENSMUSG00000010307	67893	Tmem86a	transmembrane protein 86A
428.6	0.560582	0.164798	1.77225e-05	0.000154574	ENSMUSG00000040462	216440	Os9	amplified in osteosarcoma
156.794	-0.485975	0.137524	1.80192e-05	0.000157067	ENSMUSG00000001942	22619	Siae	sialic acid acetylesterase
685.405	-0.423798	0.116183	1.83198e-05	0.00015959	ENSMUSG00000009739	19009	Pou6f1	POU domain, class 6, transcription factor 1
10.5283	-4.87819	1.6791	1.86162e-05	0.000162073	ENSMUSG00000022325	67724	Pop1	processing of precursor 1, ribonuclease P/MRP family, (S. cerevisiae)
125.758	-0.744639	0.243128	1.88368e-05	0.000163895	ENSMUSG00000112844	NA	NA	NA
145.491	0.598907	0.180824	1.89736e-05	0.000164986	ENSMUSG00000037124	216781	Trim58	tripartite motif-containing 58
308.04	0.378803	0.101603	1.90812e-05	0.000165821	ENSMUSG00000054934	58802	Kcnmb4	potassium large conductance calcium-activated channel, subfamily M, beta member 4
527.232	0.369269	0.0985903	1.92901e-05	0.000167535	ENSMUSG00000041592	237979	Sdk2	sidekick cell adhesion molecule 2
154.224	0.513122	0.148108	1.93283e-05	0.000167765	ENSMUSG00000096145	27973	Vkorc1	vitamin K epoxide reductase complex, subunit 1
103.223	-0.466211	0.131382	1.95813e-05	0.000169859	ENSMUSG00000022436	20401	Sh3bp1	SH3-domain binding protein 1
3838.08	0.240933	0.0599567	1.96882e-05	0.000170683	ENSMUSG00000006024	108124	Napa	N-ethylmaleimide sensitive fusion protein attachment protein alpha
540.476	0.390959	0.105892	1.99299e-05	0.000172569	ENSMUSG00000048707	97031	Tprn	taperin
20.7036	5.18221	1.83355	1.992e-05	0.000172569	ENSMUSG00000049134	18175	Nrap	nebulin-related anchoring protein
445.229	-0.369053	0.0987476	1.99604e-05	0.00017273	ENSMUSG00000021974	14180	Fgf9	fibroblast growth factor 9
985.48	-0.269199	0.0680886	2.00811e-05	0.000173669	ENSMUSG00000022354	66218	Ndufb9	NADH:ubiquinone oxidoreductase subunit B9
1009.75	0.236506	0.0588184	2.02453e-05	0.000174984	ENSMUSG00000001415	229512	Smg5	SMG5 nonsense mediated mRNA decay factor
741.803	0.231727	0.0574963	2.0279e-05	0.00017517	ENSMUSG00000040297	226551	Suco	SUN domain containing ossification factor
162.528	0.428129	0.118547	2.03793e-05	0.000175931	ENSMUSG00000090946	72123	Ccdc71l	coiled-coil domain containing 71 like
955.514	-0.283406	0.0723569	2.05706e-05	0.000177475	ENSMUSG00000031700	108682	Gpt2	glutamic pyruvate transaminase (alanine aminotransferase) 2
384.576	-0.602048	0.183415	2.05972e-05	0.000177598	ENSMUSG00000029438	77045	Bcl7a	B cell CLL/lymphoma 7A
464.259	0.614073	0.188456	2.07262e-05	0.000178604	ENSMUSG00000067870	NA	NA	NA
607.208	0.520143	0.151579	2.07835e-05	0.00017899	ENSMUSG00000024816	67457	Frmd8	FERM domain containing 8
52.84	0.751486	0.24884	2.09192e-05	0.00018005	ENSMUSG00000113356	NA	NA	NA
725.168	0.692573	0.222381	2.09718e-05	0.000180395	ENSMUSG00000031278	50790	Acsl4	acyl-CoA synthetase long-chain family member 4
213.177	-0.726941	0.237996	2.11706e-05	0.000181996	ENSMUSG00000056656	239552	Apol8	apolipoprotein L 8
247.722	0.380915	0.103052	2.1263e-05	0.000182681	ENSMUSG00000033707	378937	Lrrc24	leucine rich repeat containing 24
619.109	-0.3393	0.0896944	2.14816e-05	0.000184338	ENSMUSG00000021596	78771	Mctp1	multiple C2 domains, transmembrane 1
1471.94	0.254095	0.0640015	2.14709e-05	0.000184338	ENSMUSG00000026203	56812	Dnajb2	DnaJ heat shock protein family (Hsp40) member B2
260.167	-0.492488	0.14184	2.16301e-05	0.000185502	ENSMUSG00000055805	57778	Fmnl1	formin-like 1
85.0532	0.675117	0.215351	2.16492e-05	0.000185556	ENSMUSG00000049999	228966	Ppp1r3d	protein phosphatase 1, regulatory subunit 3D
769.658	-0.188541	0.046039	2.17218e-05	0.000186067	ENSMUSG00000009293	22213	Ube2g2	ubiquitin-conjugating enzyme E2G 2
118.218	-0.432831	0.120803	2.19301e-05	0.000187739	ENSMUSG00000038048	620292	Cntnap5c	contactin associated protein-like 5C
243.207	0.343773	0.0912982	2.21529e-05	0.000189534	ENSMUSG00000060038	330817	Dhps	deoxyhypusine synthase
7226.84	0.196686	0.0482737	2.235e-05	0.000191105	ENSMUSG00000032328	69981	Tmem30a	transmembrane protein 30A
1415.81	-0.208575	0.0514828	2.2471e-05	0.000192026	ENSMUSG00000057181	70591	5730455P16Rik	RIKEN cDNA 5730455P16 gene
35.5381	0.770883	0.259762	2.25786e-05	0.000192831	ENSMUSG00000092465	NA	NA	NA
136.019	0.426511	0.118889	2.26073e-05	0.000192962	ENSMUSG00000038242	71872	Aox4	aldehyde oxidase 4
548.878	0.230493	0.0575422	2.27425e-05	0.000194	ENSMUSG00000032512	67561	Wdr48	WD repeat domain 48
110.824	-0.54605	0.162743	2.29573e-05	0.000195716	ENSMUSG00000036040	77794	Adamtsl2	ADAMTS-like 2
3487.27	-0.212566	0.0526469	2.3071e-05	0.000196569	ENSMUSG00000018765	23879	Fxr2	fragile X mental retardation, autosomal homolog 2
295.081	-0.363295	0.0979805	2.35353e-05	0.000200406	ENSMUSG00000020868	217119	Xylt2	xylosyltransferase II
806.266	-0.33698	0.0895095	2.35665e-05	0.000200553	ENSMUSG00000059974	235106	Ntm	neurotrimin
237.184	0.453372	0.128731	2.37239e-05	0.000201773	ENSMUSG00000078695	217149	Cisd3	CDGSH iron sulfur domain 3
817.304	0.29859	0.0776039	2.37906e-05	0.00020222	ENSMUSG00000029033	140500	Acap3	ArfGAP with coiled-coil, ankyrin repeat and PH domains 3
432.686	-0.298305	0.0776542	2.4456e-05	0.000207753	ENSMUSG00000091811	66300	Inafm1	InaF motif containing 1
88.3595	0.955541	0.347914	2.48307e-05	0.000210812	ENSMUSG00000035314	233552	Gdpd5	glycerophosphodiester phosphodiesterase domain containing 5
829.024	-0.174779	0.0427782	2.49428e-05	0.000211639	ENSMUSG00000078908	270096	Mon1b	MON1 homolog B, secretory traffciking associated
313.824	0.990756	0.364156	2.51221e-05	0.000213034	ENSMUSG00000030342	12527	Cd9	CD9 antigen
7832.49	-0.242086	0.0612243	2.55245e-05	0.000216318	ENSMUSG00000040265	103967	Dnm3	dynamin 3
1285.62	-0.199776	0.0494843	2.5574e-05	0.00021661	ENSMUSG00000026663	226641	Atf6	activating transcription factor 6
348.257	-0.360613	0.0976688	2.55988e-05	0.000216692	ENSMUSG00000051537	331392	Gm5124	nucleolar and coiled-body phosphoprotein 1 pseudogene
601.191	-0.272629	0.0701354	2.56178e-05	0.000216725	ENSMUSG00000013846	20442	St3gal1	ST3 beta-galactoside alpha-2,3-sialyltransferase 1
73.4031	0.658204	0.211727	2.60415e-05	0.00022018	ENSMUSG00000027173	211896	Depdc7	DEP domain containing 7
461.105	0.396591	0.110035	2.6762e-05	0.000226139	ENSMUSG00000076441	11898	Ass1	argininosuccinate synthetase 1
1070.46	0.287152	0.0747127	2.68452e-05	0.000226709	ENSMUSG00000031149	54637	Praf2	PRA1 domain family 2
1071.6	-0.226178	0.0569293	2.70527e-05	0.000228327	ENSMUSG00000028403	68268	Zdhhc21	zinc finger, DHHC domain containing 21
462.203	0.245348	0.0623874	2.71123e-05	0.000228695	ENSMUSG00000054469	225010	Lclat1	lysocardiolipin acyltransferase 1
327.449	-0.444156	0.126874	2.7451e-05	0.000231417	ENSMUSG00000106379	269629	Lhfpl3	lipoma HMGIC fusion partner-like 3
1284.96	0.182472	0.0450716	2.77115e-05	0.000233476	ENSMUSG00000032024	71566	Clmp	CXADR-like membrane protein
1011.91	0.282465	0.0734592	2.78088e-05	0.000234158	ENSMUSG00000028577	18786	Plaa	phospholipase A2, activating protein
1370.83	0.27785	0.0720836	2.79153e-05	0.000234917	ENSMUSG00000000740	270106	Rpl13	ribosomal protein L13
2358.68	-0.147052	0.03588	2.80652e-05	0.00023604	ENSMUSG00000039385	12563	Cdh6	cadherin 6
836.76	0.226592	0.0571866	2.81808e-05	0.000236874	ENSMUSG00000031292	382253	Cdkl5	cyclin-dependent kinase-like 5
183.086	0.494287	0.145704	2.85202e-05	0.000239586	ENSMUSG00000037594	217887	Clba1	clathrin binding box of aftiphilin containing 1
138.382	-0.375377	0.103537	2.93032e-05	0.00024602	ENSMUSG00000039106	15563	Htr5a	5-hydroxytryptamine (serotonin) receptor 5A
796.948	-0.550913	0.16825	2.94567e-05	0.000247165	ENSMUSG00000035969	100213	Rusc2	RUN and SH3 domain containing 2
188.156	-0.359827	0.0983909	2.95474e-05	0.00024778	ENSMUSG00000070283	66706	Ndufaf3	NADH:ubiquinone oxidoreductase complex assembly factor 3
369.564	-0.497998	0.147577	2.96368e-05	0.000248386	ENSMUSG00000044005	216456	Gls2	glutaminase 2 (liver, mitochondrial)
2208.15	0.351794	0.0957668	2.9698e-05	0.000248753	ENSMUSG00000022263	223435	Trio	triple functional domain (PTPRF interacting)
1190.23	0.203368	0.0509122	2.97749e-05	0.000249252	ENSMUSG00000040385	19045	Ppp1ca	protein phosphatase 1 catalytic subunit alpha
556.403	-0.227405	0.0576279	2.99439e-05	0.000250521	ENSMUSG00000023009	380969	Nckap5l	NCK-associated protein 5-like
2193.55	0.534633	0.162184	3.04101e-05	0.000254273	ENSMUSG00000073680	320587	Tmem88b	transmembrane protein 88B
244.056	-0.302962	0.080251	3.06149e-05	0.000255837	ENSMUSG00000079555	231123	Haus3	HAUS augmin-like complex, subunit 3
1283.63	0.162971	0.0402039	3.09097e-05	0.00025815	ENSMUSG00000017929	56336	B4galt5	UDP-Gal:betaGlcNAc beta 1,4-galactosyltransferase, polypeptide 5
357.039	-0.336541	0.0910875	3.12005e-05	0.000260427	ENSMUSG00000038026	16524	Kcnj9	potassium inwardly-rectifying channel, subfamily J, member 9
861.739	0.32612	0.0877246	3.1268e-05	0.000260839	ENSMUSG00000031093	75974	Dock11	dedicator of cytokinesis 11
252.069	-0.31498	0.0841814	3.13916e-05	0.000261569	ENSMUSG00000029029	59002	Wrap73	WD repeat containing, antisense to Trp73
1223.23	-0.341944	0.0928927	3.1392e-05	0.000261569	ENSMUSG00000039157	98952	Fam102a	family with sequence similarity 102, member A
1271.25	-0.270702	0.0704719	3.14307e-05	0.00026174	ENSMUSG00000096188	97487	Cmtm4	CKLF-like MARVEL transmembrane domain containing 4
1751.67	-0.170811	0.0423064	3.14623e-05	0.000261851	ENSMUSG00000042599	338523	Kdm7a	lysine (K)-specific demethylase 7A
1710.32	-0.147954	0.0363586	3.16341e-05	0.000263129	ENSMUSG00000021114	73834	Atp6v1d	ATPase, H+ transporting, lysosomal V1 subunit D
502.456	0.389389	0.108999	3.20134e-05	0.00026613	ENSMUSG00000009013	56455	Dynll1	dynein light chain LC8-type 1
15.3343	2.17976	0.881828	3.22625e-05	0.000268045	ENSMUSG00000005087	12505	Cd44	CD44 antigen
395.903	-0.317068	0.0850608	3.25827e-05	0.000270549	ENSMUSG00000003299	66163	Mrpl4	mitochondrial ribosomal protein L4
1092.87	0.170442	0.0423134	3.28166e-05	0.000272334	ENSMUSG00000039275	68837	Foxk2	forkhead box K2
814.275	0.238219	0.061063	3.28472e-05	0.000272431	ENSMUSG00000061273	236792	Mmgt1	membrane magnesium transporter 1
741.824	-0.310513	0.0831015	3.33465e-05	0.000276413	ENSMUSG00000051851	72865	Rtl8c	retrotransposon Gag like 8C
296.755	-0.251488	0.0650122	3.34468e-05	0.000276924	ENSMUSG00000030083	80283	Abtb1	ankyrin repeat and BTB (POZ) domain containing 1
420.63	-0.431735	0.124332	3.34457e-05	0.000276924	ENSMUSG00000034353	51801	Ramp1	receptor (calcitonin) activity modifying protein 1
3704.86	0.19176	0.0480883	3.34791e-05	0.000277032	ENSMUSG00000024065	57440	Ehd3	EH-domain containing 3
49.8812	-0.724476	0.248691	3.35701e-05	0.000277465	ENSMUSG00000024145	18701	Pigf	phosphatidylinositol glycan anchor biosynthesis, class F
2776.14	0.139858	0.0343984	3.35642e-05	0.000277465	ENSMUSG00000028426	19359	Rad23b	RAD23 homolog B, nucleotide excision repair protein
114.219	-0.450353	0.131209	3.37379e-05	0.000278692	ENSMUSG00000042215	213539	Bag2	BCL2-associated athanogene 2
282.327	-0.367117	0.1018	3.38044e-05	0.000279081	ENSMUSG00000020130	66687	Tbc1d15	TBC1 domain family, member 15
75.9586	1.37406	0.550658	3.45319e-05	0.000284923	ENSMUSG00000022150	13132	Dab2	disabled 2, mitogen-responsive phosphoprotein
633.815	-0.395703	0.112048	3.55036e-05	0.000292773	ENSMUSG00000020823	74136	Sec14l1	SEC14-like lipid binding 1
1548	0.256547	0.0667688	3.55398e-05	0.000292903	ENSMUSG00000042492	68449	Tbc1d10b	TBC1 domain family, member 10b
1334.51	-0.196875	0.0496896	3.58452e-05	0.00029525	ENSMUSG00000036242	67419	Armh4	armadillo-like helical domain containing 4
1244.23	0.195993	0.0494533	3.59211e-05	0.000295706	ENSMUSG00000024360	225363	Etf1	eukaryotic translation termination factor 1
4911.44	0.247325	0.0640886	3.60268e-05	0.000296406	ENSMUSG00000028974	13347	Dffa	DNA fragmentation factor, alpha subunit
711.662	-0.33135	0.0903267	3.61946e-05	0.000297616	ENSMUSG00000031666	19651	Rbl2	RB transcriptional corepressor like 2
628.435	0.305305	0.0819161	3.62842e-05	0.000298182	ENSMUSG00000020326	12450	Ccng1	cyclin G1
3957.55	0.239437	0.0618897	3.71157e-05	0.000304841	ENSMUSG00000020198	11776	Ap3d1	adaptor-related protein complex 3, delta 1 subunit
1862.1	-0.422064	0.121858	3.71927e-05	0.000305299	ENSMUSG00000023169	105727	Slc38a1	solute carrier family 38, member 1
55.7932	0.708816	0.243921	3.7258e-05	0.00030566	ENSMUSG00000020709	216991	Adap2	ArfGAP with dual PH domains 2
343.189	0.520953	0.159974	3.82803e-05	0.000313868	ENSMUSG00000000567	20682	Sox9	SRY (sex determining region Y)-box 9
109.149	-0.605766	0.196507	3.91009e-05	0.000320413	ENSMUSG00000086596	382111	Susd5	sushi domain containing 5
106.059	2.15935	0.906022	3.94459e-05	0.000323056	ENSMUSG00000041482	667742	Piezo2	piezo-type mechanosensitive ion channel component 2
1169.64	-0.19867	0.0504827	3.94973e-05	0.000323293	ENSMUSG00000033423	140546	Eri3	exoribonuclease 3
102.433	0.644976	0.215273	4.04331e-05	0.000330764	ENSMUSG00000009376	17295	Met	met proto-oncogene
907.403	-0.254406	0.0667124	4.06949e-05	0.000332716	ENSMUSG00000039050	228983	Osbpl2	oxysterol binding protein-like 2
821.56	0.242027	0.0630264	4.07685e-05	0.000332939	ENSMUSG00000016528	17164	Mapkapk2	MAP kinase-activated protein kinase 2
217.083	-0.370155	0.104256	4.07498e-05	0.000332939	ENSMUSG00000061118	66114	Dnajc30	DnaJ heat shock protein family (Hsp40) member C30
7.66261	3.43501	1.39396	4.15048e-05	0.00033876	ENSMUSG00000026829	227671	Gbgt1	globoside alpha-1,3-N-acetylgalactosaminyltransferase 1
2691.98	-0.213626	0.0549075	4.21892e-05	0.00034415	ENSMUSG00000032393	74388	Dpp8	dipeptidylpeptidase 8
2541.62	-0.178063	0.0450587	4.29041e-05	0.000349783	ENSMUSG00000022982	20655	Sod1	superoxide dismutase 1, soluble
505.519	-0.39971	0.115144	4.30295e-05	0.000350606	ENSMUSG00000022523	14167	Fgf12	fibroblast growth factor 12
8.51167	3.2824	1.35009	4.33464e-05	0.000352988	ENSMUSG00000021360	14538	Gcnt2	glucosaminyl (N-acetyl) transferase 2, I-branching enzyme
2233.59	0.268737	0.0713802	4.34751e-05	0.000353835	ENSMUSG00000001467	13121	Cyp51	cytochrome P450, family 51
141.21	0.552548	0.175096	4.35125e-05	0.000353939	ENSMUSG00000068299	75541	Nat8f4	N-acetyltransferase 8 (GCN5-related) family member 4
2058.37	-0.275769	0.0736739	4.44803e-05	0.000361607	ENSMUSG00000027834	20713	Serpini1	serine (or cysteine) peptidase inhibitor, clade I, member 1
1219.93	-0.230492	0.0600001	4.47725e-05	0.000363777	ENSMUSG00000003575	382056	Crtc1	CREB regulated transcription coactivator 1
323.636	0.361157	0.101867	4.48068e-05	0.000363849	ENSMUSG00000063160	18223	Numbl	numb-like
6.01106	4.22829	1.75232	4.53145e-05	0.000367764	ENSMUSG00000051940	381622	5031410I06Rik	RIKEN cDNA 5031410I06 gene
225.767	-0.725112	0.257703	4.54127e-05	0.00036831	ENSMUSG00000015396	12522	Cd83	CD83 antigen
45.166	0.730184	0.260297	4.54331e-05	0.00036831	ENSMUSG00000023908	268930	Pkmyt1	protein kinase, membrane associated tyrosine/threonine 1
116.686	0.711314	0.250821	4.55792e-05	0.000369287	ENSMUSG00000031486	78560	Adgra2	adhesion G protein-coupled receptor A2
188.657	1.47435	0.622325	4.56256e-05	0.000369454	ENSMUSG00000064193	NA	NA	NA
168.62	-0.543345	0.17197	4.56828e-05	0.000369709	ENSMUSG00000096629	100041515	Gm3383	predicted gene 3383
476.294	0.34596	0.0968472	4.61018e-05	0.00037289	ENSMUSG00000073678	241062	Pgap1	post-GPI attachment to proteins 1
388.441	0.444333	0.132378	4.63686e-05	0.000374837	ENSMUSG00000018102	68024	H2bc4	H2B clustered histone 4
405.423	0.21271	0.0549771	4.64218e-05	0.000375056	ENSMUSG00000039901	71617	Armh3	armadillo-like helical domain containing 3
235.528	0.606235	0.200301	4.66577e-05	0.00037675	ENSMUSG00000032332	12816	Col12a1	collagen, type XII, alpha 1
306.713	0.367456	0.104588	4.79165e-05	0.000386697	ENSMUSG00000058126	621054	Tpm3-rs7	tropomyosin 3, related sequence 7
5149.21	-0.1766	0.0449786	4.81654e-05	0.000388487	ENSMUSG00000054455	56491	Vapb	vesicle-associated membrane protein, associated protein B and C
1573.45	-0.25501	0.0676466	4.82202e-05	0.000388711	ENSMUSG00000000560	14395	Gabra2	gamma-aminobutyric acid (GABA) A receptor, subunit alpha 2
2233.23	-0.182036	0.0464903	4.84709e-05	0.000390355	ENSMUSG00000024695	109910	Zfp91	zinc finger protein 91
549.616	-0.302044	0.0825142	4.84784e-05	0.000390355	ENSMUSG00000032405	56469	Pias1	protein inhibitor of activated STAT 1
269.075	-0.338077	0.0945257	4.85655e-05	0.000390836	ENSMUSG00000072258	21339	Taf1a	TATA-box binding protein associated factor, RNA polymerase I, A
445.112	0.548793	0.175392	4.87397e-05	0.000392019	ENSMUSG00000015341	57437	Golga7	golgi autoantigen, golgin subfamily a, 7
44.2274	6.12875	3.03325	4.87731e-05	0.000392068	ENSMUSG00000029364	59043	Wsb2	WD repeat and SOCS box-containing 2
1838.18	-0.18855	0.0483588	4.95133e-05	0.000397795	ENSMUSG00000044117	67254	Bmerb1	bMERB domain containing 1
252.633	0.49226	0.151982	4.95675e-05	0.000398009	ENSMUSG00000047414	399558	Flrt2	fibronectin leucine rich transmembrane protein 2
483.024	-0.342948	0.0963697	4.98177e-05	0.000399794	ENSMUSG00000003992	66970	Ssbp2	single-stranded DNA binding protein 2
747.1	-0.25282	0.0671619	5.02331e-05	0.000402713	ENSMUSG00000005142	17159	Man2b1	mannosidase 2, alpha B1
3073.49	0.187916	0.0482263	5.02375e-05	0.000402713	ENSMUSG00000026181	68606	Ppm1f	protein phosphatase 1F (PP2C domain containing)
1205.11	-0.215506	0.056074	5.03913e-05	0.00040372	ENSMUSG00000001774	66917	Chordc1	cysteine and histidine-rich domain (CHORD)-containing, zinc-binding protein 1
13550.6	-0.258267	0.0688538	5.04663e-05	0.000403871	ENSMUSG00000036760	223604	Kcnk9	potassium channel, subfamily K, member 9
151.9	-0.429086	0.127516	5.04555e-05	0.000403871	ENSMUSG00000043602	193043	Zfp3	zinc finger protein 3
403.506	0.303559	0.0832711	5.06948e-05	0.000405474	ENSMUSG00000030942	233802	Thumpd1	THUMP domain containing 1
526.54	0.429862	0.127902	5.08955e-05	0.000406852	ENSMUSG00000029471	207565	Camkk2	calcium/calmodulin-dependent protein kinase kinase 2, beta
437.604	0.363566	0.103741	5.11691e-05	0.000408812	ENSMUSG00000030104	192193	Edem1	ER degradation enhancer, mannosidase alpha-like 1
12.5184	1.16636	0.486504	5.16359e-05	0.000412312	ENSMUSG00000026931	67507	1700019N19Rik	RIKEN cDNA 1700019N19 gene
527.971	0.251235	0.0668187	5.18375e-05	0.000413692	ENSMUSG00000045176	71923	Borcs6	BLOC-1 related complex subunit 6
352.528	-0.441228	0.132484	5.20772e-05	0.000415374	ENSMUSG00000042662	252864	Dusp15	dual specificity phosphatase-like 15
826.064	-0.276229	0.0746458	5.23755e-05	0.000417522	ENSMUSG00000046668	67393	Cxxc5	CXXC finger 5
450.054	0.352484	0.100087	5.27228e-05	0.000420057	ENSMUSG00000005802	22785	Slc30a4	solute carrier family 30 (zinc transporter), member 4
775.128	-0.468744	0.143447	5.30446e-05	0.000422386	ENSMUSG00000057897	12323	Camk2b	calcium/calmodulin-dependent protein kinase II, beta
209.422	0.587628	0.194434	5.33062e-05	0.000424	ENSMUSG00000032796	16772	Lama1	laminin, alpha 1
14.9293	5.29543	2.46709	5.32845e-05	0.000424	ENSMUSG00000058207	20714	Serpina3k	serine (or cysteine) peptidase inhibitor, clade A, member 3K
594.785	0.262846	0.0705381	5.33965e-05	0.000424483	ENSMUSG00000022848	224132	Slc49a4	solute carrier family 49 member 4
1788.15	0.455143	0.138181	5.34588e-05	0.000424743	ENSMUSG00000060716	211945	Plekhh1	pleckstrin homology domain containing, family H (with MyTH4 domain) member 1
87.8801	-0.460012	0.140131	5.36278e-05	0.000425851	ENSMUSG00000098134	66381	Rnf113a2	ring finger protein 113A2
1082.8	0.218156	0.0570829	5.37817e-05	0.000426836	ENSMUSG00000026933	227634	Camsap1	calmodulin regulated spectrin-associated protein 1
736.359	0.267648	0.0720774	5.3818e-05	0.000426889	ENSMUSG00000028822	71817	Tmem50a	transmembrane protein 50A
384.21	-0.275477	0.0746086	5.44605e-05	0.000431746	ENSMUSG00000022223	654795	Sdr39u1	short chain dehydrogenase/reductase family 39U, member 1
1488.91	0.150034	0.0381359	5.51587e-05	0.000437041	ENSMUSG00000035629	100502698	Rubcn	RUN domain and cysteine-rich domain containing, Beclin 1-interacting protein
237.852	0.429872	0.128927	5.59696e-05	0.000443221	ENSMUSG00000026170	104086	Cyp27a1	cytochrome P450, family 27, subfamily a, polypeptide 1
383.912	1.02854	0.423643	5.60871e-05	0.000443907	ENSMUSG00000019929	13179	Dcn	decorin
85.6866	-0.922117	0.369028	5.63034e-05	0.000445374	ENSMUSG00000040618	74551	Pck2	phosphoenolpyruvate carboxykinase 2 (mitochondrial)
237.924	0.859393	0.336586	5.70939e-05	0.000451378	ENSMUSG00000049439	77951	Cyp20a1	cytochrome P450, family 20, subfamily a, polypeptide 1
793.068	-0.290688	0.0797633	5.71722e-05	0.000451748	ENSMUSG00000045790	100503884	Ccdc149	coiled-coil domain containing 149
5572.14	-0.247919	0.0662538	5.73223e-05	0.000452686	ENSMUSG00000039953	65945	Clstn1	calsyntenin 1
197.072	0.428913	0.128844	5.74531e-05	0.000453469	ENSMUSG00000001998	108011	Ap4e1	adaptor-related protein complex AP-4, epsilon 1
429.649	-0.28291	0.0772801	5.75559e-05	0.000454031	ENSMUSG00000051451	233490	Crebzf	CREB/ATF bZIP transcription factor
228.103	-0.396751	0.116799	5.78798e-05	0.000456336	ENSMUSG00000030780	233913	Rusf1	RUS family member 1
10.249	-4.50463	2.01982	5.79775e-05	0.000456855	ENSMUSG00000025885	17919	Myo5b	myosin VB
34.7014	0.954341	0.387604	5.8199e-05	0.000458349	ENSMUSG00000056692	224647	Ilrun	inflammation and lipid regulator with UBA-like and NBR1-like domains
808.876	-0.209931	0.0549861	5.83962e-05	0.00045965	ENSMUSG00000028467	230101	Gba2	glucosidase beta 2
45.9283	3.36259	1.4765	5.84285e-05	0.000459652	ENSMUSG00000000290	16414	Itgb2	integrin beta 2
889.016	-0.189418	0.0491207	5.85871e-05	0.000460648	ENSMUSG00000058709	112406	Egln2	egl-9 family hypoxia-inducible factor 2
1552.52	0.316732	0.0885611	5.86813e-05	0.000461136	ENSMUSG00000033039	27008	Micall1	microtubule associated monooxygenase, calponin and LIM domain containing -like 1
168.028	0.954987	0.388561	5.88609e-05	0.000462295	ENSMUSG00000079442	20448	St6galnac4	ST6 (alpha-N-acetyl-neuraminyl-2,3-beta-galactosyl-1,3)-N-acetylgalactosaminide alpha-2,6-sialyltransferase 4
9.48423	1.36784	0.598189	5.94059e-05	0.00046632	ENSMUSG00000042045	66402	Sln	sarcolipin
6971.21	-0.189393	0.049253	6.12357e-05	0.000480421	ENSMUSG00000056222	20745	Spock1	sparc/osteonectin, cwcv and kazal-like domains proteoglycan 1
35.1134	5.07495	2.42523	6.14265e-05	0.000481655	ENSMUSG00000042010	100705	Acacb	acetyl-Coenzyme A carboxylase beta
276.204	-0.506294	0.160999	6.1818e-05	0.000484461	ENSMUSG00000050821	78408	Fam131a	family with sequence similarity 131, member A
116.398	-0.540283	0.175788	6.18809e-05	0.000484689	ENSMUSG00000057594	70317	Arl16	ADP-ribosylation factor-like 16
859.435	0.23014	0.0612175	6.24107e-05	0.000488572	ENSMUSG00000030890	16202	Ilk	integrin linked kinase
878.709	-0.219463	0.0580456	6.26675e-05	0.000490315	ENSMUSG00000001100	67811	Poldip2	polymerase (DNA-directed), delta interacting protein 2
270.406	-0.441142	0.13469	6.32888e-05	0.000494907	ENSMUSG00000029455	11669	Aldh2	aldehyde dehydrogenase 2, mitochondrial
16.1345	-3.91367	1.75752	6.35802e-05	0.000496915	ENSMUSG00000040669	13619	Phc1	polyhomeotic 1
336.978	-0.486397	0.153535	6.5763e-05	0.000513696	ENSMUSG00000050587	241568	Lrrc4c	leucine rich repeat containing 4C
72.5286	0.803429	0.312558	6.59373e-05	0.000514777	ENSMUSG00000115338	18950	Pnp	purine-nucleoside phosphorylase
973.991	-0.577245	0.194269	6.69781e-05	0.000522619	ENSMUSG00000025892	14802	Gria4	glutamate receptor, ionotropic, AMPA4 (alpha 4)
259.457	-0.294922	0.0821081	6.73072e-05	0.000524901	ENSMUSG00000002393	13864	Nr2f6	nuclear receptor subfamily 2, group F, member 6
8503.87	0.169061	0.0438415	6.7518e-05	0.000526145	ENSMUSG00000015837	18412	Sqstm1	sequestosome 1
59.4824	1.00166	0.421236	6.754e-05	0.000526145	ENSMUSG00000031111	209268	Igsf1	immunoglobulin superfamily, member 1
2837.38	-0.369577	0.108207	6.75824e-05	0.00052619	ENSMUSG00000027350	12653	Chgb	chromogranin B
417.069	0.222341	0.0592832	6.90349e-05	0.000537208	ENSMUSG00000069814	432582	Ccdc92b	coiled-coil domain containing 92B
115.863	0.572859	0.192848	6.91213e-05	0.000537589	ENSMUSG00000031903	192654	Pla2g15	phospholipase A2, group XV
644.638	0.42228	0.128358	6.94001e-05	0.000539466	ENSMUSG00000027878	18129	Notch2	notch 2
35.97	0.945624	0.393912	7.07066e-05	0.000549324	ENSMUSG00000020363	14584	Gfpt2	glutamine fructose-6-phosphate transaminase 2
287.541	0.290511	0.0809476	7.08453e-05	0.000550078	ENSMUSG00000011114	21376	Tbrg1	transforming growth factor beta regulated gene 1
71.7243	0.640767	0.227087	7.08802e-05	0.000550078	ENSMUSG00000017652	21939	Cd40	CD40 antigen
1343.96	-0.268462	0.0738043	7.1753e-05	0.00055655	ENSMUSG00000025738	214931	Fbxl16	F-box and leucine-rich repeat protein 16
284.884	0.346849	0.1005	7.19256e-05	0.000557589	ENSMUSG00000033294	100608	Noc4l	NOC4 like
785.311	-0.207037	0.0549069	7.21671e-05	0.000559159	ENSMUSG00000027131	68032	Emc4	ER membrane protein complex subunit 4
266.638	-0.447024	0.138677	7.24741e-05	0.00056063	ENSMUSG00000023036	93707	Pcdhgc4	protocadherin gamma subfamily C, 4
226.3	0.410667	0.124324	7.24701e-05	0.00056063	ENSMUSG00000055371	56324	Stam2	signal transducing adaptor molecule (SH3 domain and ITAM motif) 2
2353.62	-0.205897	0.0545865	7.24663e-05	0.00056063	ENSMUSG00000070498	208151	Tmem132b	transmembrane protein 132B
1575.75	0.170031	0.0443277	7.28646e-05	0.000563348	ENSMUSG00000028381	22234	Ugcg	UDP-glucose ceramide glucosyltransferase
4097.85	0.198759	0.0525216	7.29132e-05	0.00056342	ENSMUSG00000029126	18196	Nsg1	neuron specific gene family member 1
312.125	-0.26595	0.073096	7.31433e-05	0.000564894	ENSMUSG00000030019	101358	Fbxl14	F-box and leucine-rich repeat protein 14
394.015	0.300418	0.0844982	7.35816e-05	0.000567974	ENSMUSG00000079614	72124	Seh1l	SEH1-like (S. cerevisiae
459.428	-0.348297	0.101279	7.43033e-05	0.000573237	ENSMUSG00000030805	20909	Stx4a	syntaxin 4A (placental)
1155.93	-0.443773	0.137766	7.48398e-05	0.000577065	ENSMUSG00000028883	20346	Sema3a	sema domain, immunoglobulin domain (Ig), short basic domain, secreted, (semaphorin) 3A
238.437	0.39679	0.11936	7.50799e-05	0.000578606	ENSMUSG00000055069	270160	Rab39	RAB39, member RAS oncogene family
685.646	-0.300498	0.0847055	7.57151e-05	0.000583189	ENSMUSG00000041035	226162	Dpcd	deleted in primary ciliary dyskinesia
291.092	-0.362136	0.10658	7.67282e-05	0.000590675	ENSMUSG00000032184	70082	Lysmd2	LysM, putative peptidoglycan-binding, domain containing 2
2336.63	-0.167141	0.0436791	7.70699e-05	0.000592988	ENSMUSG00000078566	12176	Bnip3	BCL2/adenovirus E1B interacting protein 3
139.433	-0.38469	0.115074	7.74766e-05	0.000595798	ENSMUSG00000021069	110095	Pygl	liver glycogen phosphorylase
10192.1	0.1675	0.0438288	7.84143e-05	0.000602686	ENSMUSG00000025151	94275	Maged1	MAGE family member D1
7.61036	2.91862	1.38684	7.87014e-05	0.00060457	ENSMUSG00000042812	15227	Foxf1	forkhead box F1
776.326	0.271868	0.075427	7.90114e-05	0.000606627	ENSMUSG00000060098	214572	Prmt7	protein arginine N-methyltransferase 7
675.047	0.230244	0.0622724	7.95905e-05	0.000610747	ENSMUSG00000034453	70428	Polr3b	polymerase (RNA) III (DNA directed) polypeptide B
850.872	-0.26956	0.0747772	8.05238e-05	0.000617578	ENSMUSG00000036099	215008	Vezt	vezatin, adherens junctions transmembrane protein
6449.6	0.305733	0.0869279	8.09869e-05	0.000620799	ENSMUSG00000021313	20191	Ryr2	ryanodine receptor 2, cardiac
519.318	-0.414889	0.127209	8.11762e-05	0.000621918	ENSMUSG00000055409	338352	Nell1	NEL-like 1
1795.78	0.177599	0.0468101	8.18691e-05	0.000626892	ENSMUSG00000089945	677884	Pakap	paralemmin A kinase anchor protein
3700.23	-0.272955	0.0759908	8.2039e-05	0.000627859	ENSMUSG00000027634	29812	Ndrg3	N-myc downstream regulated gene 3
1687.3	-0.134392	0.0348655	8.31798e-05	0.00063625	ENSMUSG00000032199	28015	Polr2m	polymerase (RNA) II (DNA directed) polypeptide M
220.804	-0.284068	0.07978	8.358e-05	0.000638971	ENSMUSG00000031813	73711	Mvb12a	multivesicular body subunit 12A
22053.1	0.236586	0.0644689	8.39279e-05	0.000641289	ENSMUSG00000022048	12934	Dpysl2	dihydropyrimidinase-like 2
386.669	0.250656	0.0689221	8.43154e-05	0.000643908	ENSMUSG00000028233	116940	Tgs1	trimethylguanosine synthase 1
220.956	0.294942	0.0835758	8.53395e-05	0.000651382	ENSMUSG00000022856	66664	Tmem41a	transmembrane protein 41a
722.825	-0.179291	0.0474382	8.57588e-05	0.000654235	ENSMUSG00000033623	69587	Pcgf3	polycomb group ring finger 3
23.5126	-3.61074	1.75192	8.64695e-05	0.000659307	ENSMUSG00000030769	233836	Slc5a11	solute carrier family 5 (sodium/glucose cotransporter), member 11
469.218	-0.202957	0.0543859	8.69159e-05	0.000662359	ENSMUSG00000041733	52064	Coq5	coenzyme Q5 methyltransferase
195.891	-0.457915	0.145598	8.72896e-05	0.000664855	ENSMUSG00000024132	13177	Eci1	enoyl-Coenzyme A delta isomerase 1
219.722	-0.29216	0.08283	8.8103e-05	0.000670694	ENSMUSG00000020553	18559	Pctp	phosphatidylcholine transfer protein
156.505	0.418804	0.129854	8.93048e-05	0.000679483	ENSMUSG00000037366	100163	Pafah2	platelet-activating factor acetylhydrolase 2
133.567	-0.512203	0.169882	9.06317e-05	0.000689214	ENSMUSG00000039646	246154	Vasn	vasorin
832.234	-0.358828	0.106841	9.09218e-05	0.000691054	ENSMUSG00000020022	66414	Ndufa12	NADH:ubiquinone oxidoreductase subunit A12
166.509	-0.372339	0.111957	9.12365e-05	0.000693079	ENSMUSG00000075227	29805	Znhit2	zinc finger, HIT domain containing 2
692.519	0.29491	0.0839941	9.12937e-05	0.000693147	ENSMUSG00000021540	17129	Smad5	SMAD family member 5
307.01	-0.666762	0.248856	9.24585e-05	0.000701249	ENSMUSG00000032006	71785	Pdgfd	platelet-derived growth factor, D polypeptide
282.834	0.508286	0.168452	9.24543e-05	0.000701249	ENSMUSG00000032434	67213	Cmtm6	CKLF-like MARVEL transmembrane domain containing 6
186.926	-0.454243	0.144985	9.33871e-05	0.000707545	ENSMUSG00000016179	215303	Camk1g	calcium/calmodulin-dependent protein kinase I gamma
27368.6	0.334454	0.0980973	9.33608e-05	0.000707545	ENSMUSG00000062825	11465	Actg1	actin, gamma, cytoplasmic 1
1325.3	-0.264704	0.0740016	9.3511e-05	0.000708111	ENSMUSG00000061689	228836	Dlgap4	DLG associated protein 4
1109.74	-0.191166	0.0511807	9.38417e-05	0.00071024	ENSMUSG00000022200	66629	Golph3	golgi phosphoprotein 3
99.8591	-0.470719	0.1521	9.39659e-05	0.000710806	ENSMUSG00000051890	271005	Klhdc1	kelch domain containing 1
880.689	-0.18534	0.0494873	9.41105e-05	0.000711505	ENSMUSG00000035476	66724	Tab3	TGF-beta activated kinase 1/MAP3K7 binding protein 3
1412.69	-0.207171	0.0559477	9.41574e-05	0.000711505	ENSMUSG00000048978	22360	Nrsn1	neurensin 1
130.447	0.426394	0.133593	9.44719e-05	0.000713506	ENSMUSG00000016344	66496	Ppdpf	pancreatic progenitor cell differentiation and proliferation factor
1089.77	0.248165	0.0687329	9.5302e-05	0.000719397	ENSMUSG00000069682	19897	Gm10275	Rpl12 pseudogene
333.03	-0.355263	0.105982	9.59055e-05	0.000723573	ENSMUSG00000025576	52897	Rbfox3	RNA binding protein, fox-1 homolog (C. elegans) 3
986.107	-0.202826	0.0547248	9.61633e-05	0.000725137	ENSMUSG00000043542	67306	Zc2hc1a	zinc finger, C2HC-type containing 1A
136.754	0.519874	0.174522	9.64082e-05	0.000726602	ENSMUSG00000058704	76890	Memo1	mediator of cell motility 1
304.604	0.379599	0.115311	9.68284e-05	0.000729387	ENSMUSG00000034118	22021	Tpst1	protein-tyrosine sulfotransferase 1
408.057	-0.272795	0.0769019	9.72804e-05	0.000732407	ENSMUSG00000074649	613262	BC029722	cDNA sequence BC029722
126.469	-0.43417	0.137228	9.78745e-05	0.000736494	ENSMUSG00000038175	218203	Mylip	myosin regulatory light chain interacting protein
1257.77	-0.321456	0.0937995	9.81723e-05	0.000738348	ENSMUSG00000029221	109108	Slc30a9	solute carrier family 30 (zinc transporter), member 9
2412.05	-0.296122	0.085145	0.000102171	0.000768018	ENSMUSG00000020431	432530	Adcy1	adenylate cyclase 1
894.393	0.219665	0.0601114	0.000102795	0.00077231	ENSMUSG00000042121	231637	Ssh1	slingshot protein phosphatase 1
208.507	0.659408	0.248379	0.000103447	0.000776796	ENSMUSG00000028373	56079	Astn2	astrotactin 2
233.698	0.633602	0.234227	0.000104316	0.000782912	ENSMUSG00000037820	21817	Tgm2	transglutaminase 2, C polypeptide
53.3303	1.85943	0.94723	0.000104953	0.000787282	ENSMUSG00000093985	100038847	Gm10406	predicted gene 10406
871.123	-0.245301	0.0683049	0.000105189	0.000788229	ENSMUSG00000008226	74616	Scrn3	secernin 3
10846.3	-0.23439	0.0648179	0.000105153	0.000788229	ENSMUSG00000022037	12759	Clu	clusterin
1760.02	0.342135	0.101921	0.000105568	0.000790662	ENSMUSG00000067274	11837	Rplp0	ribosomal protein, large, P0
916.532	-0.286375	0.0820241	0.000106104	0.000794261	ENSMUSG00000024940	16998	Ltbp3	latent transforming growth factor beta binding protein 3
732.25	0.18682	0.0503324	0.000106204	0.000794595	ENSMUSG00000041801	27280	Phlda3	pleckstrin homology like domain, family A, member 3
13009.1	0.275984	0.0784922	0.000106278	0.000794737	ENSMUSG00000029223	22223	Uchl1	ubiquitin carboxy-terminal hydrolase L1
29.3853	0.618902	0.226839	0.000106728	0.000797683	ENSMUSG00000091455	628870	Otogl	otogelin-like
1039.69	0.19952	0.0541566	0.000107558	0.000803469	ENSMUSG00000003458	59287	Ncstn	nicastrin
379.666	0.321059	0.0944129	0.000108485	0.00080997	ENSMUSG00000021952	57258	Xpo4	exportin 4
1110.35	0.29256	0.0843142	0.000108652	0.0008108	ENSMUSG00000028788	19244	Ptp4a2	protein tyrosine phosphatase 4a2
58.3765	-0.700578	0.274024	0.00010903	0.000813198	ENSMUSG00000041617	72315	Ccdc74a	coiled-coil domain containing 74A
72.2539	0.59919	0.216936	0.000109566	0.000816773	ENSMUSG00000020669	24057	Sh3yl1	Sh3 domain YSC-like 1
1520.31	0.207229	0.056594	0.000110491	0.000823236	ENSMUSG00000034560	319277	Washc4	WASH complex subunit 4
1240.97	0.248033	0.0694436	0.000110604	0.000823656	ENSMUSG00000037072	93684	Selenof	selenoprotein F
3247.37	-0.103428	0.0271076	0.000111484	0.000829775	ENSMUSG00000030327	67602	Necap1	NECAP endocytosis associated 1
459.156	0.260979	0.0737843	0.000112388	0.000836069	ENSMUSG00000022105	19645	Rb1	RB transcriptional corepressor 1
20.0499	2.11938	1.10752	0.000113526	0.000844103	ENSMUSG00000032578	12700	Cish	cytokine inducible SH2-containing protein
477.849	0.355003	0.107469	0.000114347	0.000849763	ENSMUSG00000027508	94212	Pag1	phosphoprotein associated with glycosphingolipid microdomains 1
288.875	-0.295999	0.0859504	0.000115932	0.0008611	ENSMUSG00000035757	223776	Selenoo	selenoprotein O
312.323	-0.254676	0.0718765	0.000116132	0.000861696	ENSMUSG00000028576	67694	Ift74	intraflagellar transport 74
1054.11	0.42563	0.135869	0.000116102	0.000861696	ENSMUSG00000032135	84004	Mcam	melanoma cell adhesion molecule
1005.29	0.213236	0.0586503	0.000116375	0.000863048	ENSMUSG00000028986	52323	Klhl7	kelch-like 7
625.844	-0.355419	0.107824	0.000116803	0.000865775	ENSMUSG00000035206	73218	Sppl2b	signal peptide peptidase like 2B
559.471	-0.211307	0.0580863	0.000117258	0.000868701	ENSMUSG00000039860	58212	Srrm3	serine/arginine repetitive matrix 3
101.286	-0.499518	0.168653	0.000117404	0.000869337	ENSMUSG00000074652	668940	Myh7b	myosin, heavy chain 7B, cardiac muscle, beta
5169.55	-0.27148	0.077584	0.00011785	0.000872189	ENSMUSG00000024083	224938	Pja2	praja ring finger ubiquitin ligase 2
75.2287	0.474337	0.15721	0.000117913	0.000872204	ENSMUSG00000071362	NA	NA	NA
819.808	0.354253	0.107549	0.000118984	0.000879671	ENSMUSG00000033295	19268	Ptprf	protein tyrosine phosphatase, receptor type, F
888.453	-0.255847	0.0724617	0.000120426	0.00088988	ENSMUSG00000037656	20516	Slc20a2	solute carrier family 20, member 2
151.384	-0.412459	0.130871	0.000120662	0.00089116	ENSMUSG00000063683	107146	Glyat	glycine-N-acyltransferase
969.741	0.216699	0.059922	0.000121866	0.000899593	ENSMUSG00000020946	56494	Gosr2	golgi SNAP receptor complex member 2
25.6101	-4.56866	2.66377	0.000122311	0.000901948	ENSMUSG00000015697	84505	Setdb1	SET domain, bifurcated 1
898.379	0.205762	0.0565532	0.000122274	0.000901948	ENSMUSG00000022437	68653	Samm50	SAMM50 sorting and assembly machinery component
234.663	-0.581729	0.210627	0.000122779	0.000904935	ENSMUSG00000034324	208213	Tmem132c	transmembrane protein 132C
124.902	0.963084	0.440498	0.000123087	0.000906743	ENSMUSG00000058056	72333	Palld	palladin, cytoskeletal associated protein
222.324	0.353986	0.107789	0.000123453	0.00090897	ENSMUSG00000105867	115490131	Gm42517	predicted gene 42517
118.051	-0.407383	0.129067	0.000123608	0.000909649	ENSMUSG00000049489	69109	Ccnq	cyclin Q
1135.48	-0.224464	0.0624469	0.00012422	0.000913685	ENSMUSG00000035754	216156	Wdr18	WD repeat domain 18
403.583	-0.270465	0.0776195	0.000125585	0.00092325	ENSMUSG00000002416	68198	Ndufb2	NADH:ubiquinone oxidoreductase subunit B2
694.7	0.295186	0.0862212	0.000125758	0.000924049	ENSMUSG00000035051	106794	Dhx57	DEAH (Asp-Glu-Ala-Asp/His) box polypeptide 57
34.0084	0.595787	0.219212	0.000127387	0.000935537	ENSMUSG00000034765	240672	Dusp5	dual specificity phosphatase 5
1339.05	-0.330063	0.0990259	0.000127706	0.000936924	ENSMUSG00000028760	230861	Eif4g3	eukaryotic translation initiation factor 4 gamma, 3
3757.63	0.24389	0.0688316	0.000127654	0.000936924	ENSMUSG00000036198	75404	Arhgap36	Rho GTPase activating protein 36
509.474	-0.266095	0.0762412	0.000127873	0.000937672	ENSMUSG00000028673	71665	Fuca1	fucosidase, alpha-L- 1, tissue
764.013	-0.312084	0.0926955	0.000132761	0.000973018	ENSMUSG00000031453	19414	Rasa3	RAS p21 protein activator 3
38.9936	2.27949	1.24025	0.000133559	0.000978363	ENSMUSG00000035783	11475	Acta2	actin alpha 2, smooth muscle, aorta
1196.38	-0.271823	0.0784874	0.000134173	0.000982359	ENSMUSG00000053617	14218	Sh3pxd2a	SH3 and PX domains 2A
1059.53	-0.206091	0.057134	0.000137444	0.0010058	ENSMUSG00000021578	67433	Ccdc127	coiled-coil domain containing 127
1053.59	0.194094	0.0534637	0.000137937	0.0010089	ENSMUSG00000028945	19744	Rheb	Ras homolog enriched in brain
106.703	0.634502	0.24362	0.000138141	0.00100987	ENSMUSG00000066838	232855	Zfp772	zinc finger protein 772
894.688	-0.339702	0.103351	0.000138257	0.0010102	ENSMUSG00000001802	435965	Lrp3	low density lipoprotein receptor-related protein 3
3835.9	-0.334382	0.101355	0.000138714	0.00101303	ENSMUSG00000025931	74229	Paqr8	progestin and adipoQ receptor family member VIII
44.6394	0.830388	0.365865	0.000139098	0.00101532	ENSMUSG00000005124	22402	Ccn4	cellular communication network factor 4
577.321	-0.277945	0.0808437	0.0001393	0.00101628	ENSMUSG00000050608	433771	Micos10	mitochondrial contact site and cristae organizing system subunit 10
1083.3	0.155482	0.0420737	0.000139372	0.00101628	ENSMUSG00000027566	26444	Psma7	proteasome subunit alpha 7
933.573	-0.23718	0.0671171	0.000140178	0.00102164	ENSMUSG00000026600	20652	Soat1	sterol O-acyltransferase 1
11.8207	1.42705	0.744728	0.000140977	0.00102694	ENSMUSG00000037628	72391	Cdkn3	cyclin-dependent kinase inhibitor 3
1014.53	0.20044	0.0555389	0.000142638	0.00103852	ENSMUSG00000028156	13684	Eif4e	eukaryotic translation initiation factor 4E
3257.68	0.151558	0.0410226	0.00014318	0.00104194	ENSMUSG00000039740	56737	Alg2	asparagine-linked glycosylation 2 (alpha-1,3-mannosyltransferase)
225.836	-0.357152	0.110679	0.000146675	0.00106683	ENSMUSG00000117924	66836	Tmem223	transmembrane protein 223
2285.06	-0.150407	0.0407674	0.000147021	0.00106881	ENSMUSG00000056124	56386	B4galt6	UDP-Gal:betaGlcNAc beta 1,4-galactosyltransferase, polypeptide 6
117.419	0.423258	0.138017	0.000147262	0.00107002	ENSMUSG00000032044	71989	Rpusd4	RNA pseudouridylate synthase domain containing 4
3376.68	0.357941	0.11109	0.000148154	0.00107595	ENSMUSG00000035093	70354	Secisbp2l	SECIS binding protein 2-like
485.137	0.283482	0.0832026	0.000148333	0.00107671	ENSMUSG00000027472	68559	Pdrg1	p53 and DNA damage regulated 1
403.642	0.260341	0.0751777	0.000148809	0.00107962	ENSMUSG00000025531	12662	Chm	choroidermia (RAB escort protein 1)
299.142	-0.401659	0.129022	0.000149657	0.00108522	ENSMUSG00000051427	216516	Ccdc157	coiled-coil domain containing 157
986.663	-0.224962	0.0634836	0.000149889	0.00108636	ENSMUSG00000028557	29864	Rnf11	ring finger protein 11
1173.62	-0.180783	0.0497873	0.000151543	0.00109779	ENSMUSG00000022601	271377	Zbtb11	zinc finger and BTB domain containing 11
70.8594	2.44656	1.37555	0.000151773	0.0010989	ENSMUSG00000108815	NA	NA	NA
113.986	-0.48699	0.167466	0.000152041	0.00110029	ENSMUSG00000026321	21934	Tnfrsf11a	tumor necrosis factor receptor superfamily, member 11a, NFKB activator
64.4721	-0.611649	0.233469	0.000152273	0.00110141	ENSMUSG00000026227	72792	2810459M11Rik	RIKEN cDNA 2810459M11 gene
230.953	0.298415	0.0887724	0.000152862	0.00110512	ENSMUSG00000028690	67096	Mmachc	methylmalonic aciduria cblC type, with homocystinuria
811.067	-0.320012	0.096783	0.000153377	0.00110828	ENSMUSG00000092083	98741	Kcnb2	potassium voltage gated channel, Shab-related subfamily, member 2
5129.61	-0.247664	0.071079	0.000153835	0.00111103	ENSMUSG00000034488	13612	Edil3	EGF-like repeats and discoidin I-like domains 3
6.33168	2.60221	1.4702	0.000154471	0.0011145	ENSMUSG00000021125	11847	Arg2	arginase type II
1189.46	-0.243336	0.0696541	0.000154447	0.0011145	ENSMUSG00000027180	57443	Fbxo3	F-box protein 3
98.7938	0.411054	0.13347	0.000155203	0.00111922	ENSMUSG00000062116	232853	Zfp954	zinc finger protein 954
14.717	1.60953	0.880145	0.000155507	0.00112085	ENSMUSG00000031101	74131	Sash3	SAM and SH3 domain containing 3
34420.1	-0.235598	0.067137	0.000155758	0.0011221	ENSMUSG00000033161	11928	Atp1a1	ATPase, Na+/K+ transporting, alpha 1 polypeptide
1416.82	0.182993	0.050557	0.000155952	0.00112293	ENSMUSG00000029434	77573	Vps33a	VPS33A CORVET/HOPS core subunit
286.101	-0.329574	0.100583	0.000156591	0.00112697	ENSMUSG00000062526	225651	Mppe1	metallophosphoesterase 1
387.248	-0.246927	0.0709466	0.000157068	0.00112984	ENSMUSG00000016257	66390	Prelid3b	PRELI domain containing 3B
8491.71	-0.267805	0.0781208	0.000158213	0.0011375	ENSMUSG00000055567	329178	Unc80	unc-80, NALCN activator
940.282	0.207295	0.0581829	0.00016106	0.00115739	ENSMUSG00000004798	29869	Ulk2	unc-51 like kinase 2
[truncated: 12,426 more rows]

## Sheet: 2_Moto_ControlIP_ControlI
baseMean	log2FoldChange	lfcSE	pvalue	padj	ENSEMBL	ENTREZID	SYMBOL	GENENAME
2133.53	-2.69825	0.0698586	0	0	ENSMUSG00000004892	12032	Bcan	brevican
8089.96	3.22922	0.0600187	0	0	ENSMUSG00000006342	71733	Susd2	sushi domain containing 2
1909.23	-3.14417	0.069013	0	0	ENSMUSG00000010663	76267	Fads1	fatty acid desaturase 1
4957.74	1.06035	0.0280536	0	0	ENSMUSG00000014077	56398	Chp1	calcineurin-like EF hand protein 1
5288.81	1.35406	0.0275692	0	0	ENSMUSG00000020135	23805	Apc2	APC regulator of WNT signaling pathway 2
105695	3.1636	0.0832419	0	0	ENSMUSG00000020396	380684	Nefh	neurofilament, heavy polypeptide
2542.03	1.27372	0.0275356	0	0	ENSMUSG00000020936	18107	Nmt1	N-myristoyltransferase 1
4686.85	1.64409	0.0336698	0	0	ENSMUSG00000021087	104001	Rtn1	reticulon 1
6864.54	1.60675	0.0391547	0	0	ENSMUSG00000021719	52882	Rgs7bp	regulator of G-protein signalling 7 binding protein
5251.58	2.16842	0.0373506	0	0	ENSMUSG00000021730	15165	Hcn1	hyperpolarization activated cyclic nucleotide gated potassium channel 1
2480.54	3.22039	0.0715717	0	0	ENSMUSG00000021919	12647	Chat	choline acetyltransferase
2913.46	1.73367	0.0410558	0	0	ENSMUSG00000021991	12294	Cacna2d3	calcium channel, voltage-dependent, alpha2/delta subunit 3
12473.2	2.99977	0.0741391	0	0	ENSMUSG00000023945	63993	Slc5a7	solute carrier family 5 (choline transporter), member 7
15985.1	2.4251	0.0575541	0	0	ENSMUSG00000024044	13823	Epb41l3	erythrocyte membrane protein band 4.1 like 3
6523.22	1.95601	0.0474223	0	0	ENSMUSG00000024501	22240	Dpysl3	dihydropyrimidinase-like 3
14137	1.90221	0.032775	0	0	ENSMUSG00000025092	73442	Hspa12a	heat shock protein 12A
2169.18	-4.61626	0.122122	0	0	ENSMUSG00000025321	320910	Itgb8	integrin beta 8
1585.17	1.73257	0.0423795	0	0	ENSMUSG00000026443	16980	Lrrn2	leucine rich repeat protein 2, neuronal
22944.7	1.32123	0.0279665	0	0	ENSMUSG00000026452	20980	Syt2	synaptotagmin II
2719.2	1.75953	0.0441244	0	0	ENSMUSG00000026496	11545	Parp1	poly (ADP-ribose) polymerase family, member 1
26697.1	1.33548	0.0280893	0	0	ENSMUSG00000026764	16574	Kif5c	kinesin family member 5C
3320.22	1.61924	0.0407872	0	0	ENSMUSG00000027394	69737	Ttl	tubulin tyrosine ligase
21041.6	1.99426	0.0404851	0	0	ENSMUSG00000027500	20257	Stmn2	stathmin-like 2
3423.61	2.94064	0.0650234	0	0	ENSMUSG00000028370	18491	Pappa	pregnancy-associated plasma protein A
10237.6	1.98552	0.0488148	0	0	ENSMUSG00000028530	16451	Jak1	Janus kinase 1
4747.31	2.27482	0.0473347	0	0	ENSMUSG00000030110	19713	Ret	ret proto-oncogene
4621.9	2.19352	0.0572041	0	0	ENSMUSG00000030772	50781	Dkk3	dickkopf WNT signaling pathway inhibitor 3
34420.1	2.54818	0.0648451	0	0	ENSMUSG00000033161	11928	Atp1a1	ATPase, Na+/K+ transporting, alpha 1 polypeptide
2027.96	-1.99349	0.0510358	0	0	ENSMUSG00000033720	94282	Sfxn5	sideroflexin 5
1457.82	2.6209	0.0485433	0	0	ENSMUSG00000034997	15558	Htr2a	5-hydroxytryptamine (serotonin) receptor 2A
2647.26	1.95679	0.0472262	0	0	ENSMUSG00000035246	236899	Pcyt1b	phosphate cytidylyltransferase 1, choline, beta isoform
3757.63	2.87628	0.0692288	0	0	ENSMUSG00000036198	75404	Arhgap36	Rho GTPase activating protein 36
2718.58	2.42543	0.0452976	0	0	ENSMUSG00000036502	245386	Tmem255a	transmembrane protein 255A
7709.04	2.31314	0.0577522	0	0	ENSMUSG00000036800	70363	Fam135b	family with sequence similarity 135, member B
655.892	2.14707	0.0543582	0	0	ENSMUSG00000037196	69310	Pacrg	PARK2 co-regulated
2674.86	-3.26831	0.0853738	0	0	ENSMUSG00000037242	29876	Clic4	chloride intracellular channel 4 (mitochondrial)
5716.07	1.29541	0.0270866	0	0	ENSMUSG00000037331	73158	Larp1	La ribonucleoprotein domain family, member 1
10941.7	-2.75248	0.0707295	0	0	ENSMUSG00000037742	13627	Eef1a1	eukaryotic translation elongation factor 1 alpha 1
1384.66	-2.82074	0.0735521	0	0	ENSMUSG00000038349	227120	Plcl1	phospholipase C-like 1
2369.06	1.42644	0.0370218	0	0	ENSMUSG00000038555	225362	Reep2	receptor accessory protein 2
2548.56	-2.49155	0.0541014	0	0	ENSMUSG00000038855	320404	Itpkb	inositol 1,4,5-trisphosphate 3-kinase B
46983.2	2.73892	0.0658765	0	0	ENSMUSG00000039126	353211	Prune2	prune homolog 2
5512.93	1.54346	0.0306906	0	0	ENSMUSG00000039145	227541	Camk1d	calcium/calmodulin-dependent protein kinase ID
2358.68	2.10523	0.0380927	0	0	ENSMUSG00000039385	12563	Cdh6	cadherin 6
31811.8	2.13713	0.0485299	0	0	ENSMUSG00000040035	214240	Disp2	dispatched RND tramsporter family member 2
2605.56	1.75306	0.0380357	0	0	ENSMUSG00000041313	11987	Slc7a1	solute carrier family 7 (cationic amino acid transporter, y+ system), member 1
2416.58	2.13437	0.0564019	0	0	ENSMUSG00000041548	80888	Hspb8	heat shock protein 8
2129.86	2.15143	0.0566045	0	0	ENSMUSG00000041608	215446	Entpd3	ectonucleoside triphosphate diphosphohydrolase 3
2289.29	1.88971	0.0502921	0	0	ENSMUSG00000044505	320747	Lingo4	leucine rich repeat and Ig domain containing 4
2256.35	1.82111	0.0429181	0	0	ENSMUSG00000044847	72290	Lsm11	U7 snRNP-specific Sm-like protein LSM11
2646.26	1.46763	0.0380763	0	0	ENSMUSG00000044864	99696	Ankrd50	ankyrin repeat domain 50
3976.49	1.87298	0.0378817	0	0	ENSMUSG00000045613	243764	Chrm2	cholinergic receptor, muscarinic 2, cardiac
3409.28	1.43071	0.0352036	0	0	ENSMUSG00000045967	241263	Gpr158	G protein-coupled receptor 158
1202.53	1.88786	0.0490458	0	0	ENSMUSG00000046699	245446	Slitrk4	SLIT and NTRK-like family, member 4
999.165	2.44073	0.0629477	0	0	ENSMUSG00000047344	236285	Lancl3	LanC lantibiotic synthetase component C-like 3 (bacterial)
1412.69	-2.22825	0.046635	0	0	ENSMUSG00000048978	22360	Nrsn1	neurensin 1
3300.1	1.72165	0.0413546	0	0	ENSMUSG00000051343	52055	Rab11fip5	RAB11 family interacting protein 5 (class I)
245436	2.72787	0.0684814	0	0	ENSMUSG00000052727	17755	Map1b	microtubule-associated protein 1B
2951.54	-2.52886	0.0660595	0	0	ENSMUSG00000061436	15258	Hipk2	homeodomain interacting protein kinase 2
1998.76	-1.92074	0.049986	0	0	ENSMUSG00000063015	12453	Ccni	cyclin I
1487.47	2.43489	0.0607564	0	0	ENSMUSG00000066438	217682	Plekhd1	pleckstrin homology domain containing, family D (with coiled-coil domains) member 1
15227.7	2.22386	0.0474978	0	0	ENSMUSG00000069072	241919	Slc7a14	solute carrier family 7 (cationic amino acid transporter, y+ system), member 14
50740.8	3.02564	0.0728208	0	0	ENSMUSG00000118667	100041194	Ahnak2	AHNAK nucleoprotein 2
2354.09	-2.34979	0.0628921	8.25339e-307	1.8525e-304	ENSMUSG00000033763	244654	Mtss2	MTSS I-BAR domain containing 2
5834.18	1.25007	0.033417	8.40349e-307	1.85717e-304	ENSMUSG00000038970	231876	Lmtk2	lemur tyrosine kinase 2
2756.39	1.44008	0.0385975	2.06534e-305	4.49525e-303	ENSMUSG00000027603	207182	Ggt7	gamma-glutamyltransferase 7
4911.44	2.34976	0.0631851	5.36757e-304	1.15082e-301	ENSMUSG00000028974	13347	Dffa	DNA fragmentation factor, alpha subunit
6971.21	1.78572	0.048052	2.09433e-303	4.42428e-301	ENSMUSG00000056222	20745	Spock1	sparc/osteonectin, cwcv and kazal-like domains proteoglycan 1
1325.47	1.79916	0.0484726	1.09195e-302	2.27331e-300	ENSMUSG00000034591	338365	Slc41a2	solute carrier family 41, member 2
2529.02	1.49402	0.0402364	1.41701e-302	2.90791e-300	ENSMUSG00000075478	76965	Slitrk1	SLIT and NTRK-like family, member 1
1959.46	1.91186	0.0516413	2.99433e-301	6.05824e-299	ENSMUSG00000029166	100732	Mapre3	microtubule-associated protein, RP/EB family, member 3
4561.76	2.40548	0.0651336	7.88649e-300	1.57346e-297	ENSMUSG00000038530	19736	Rgs4	regulator of G-protein signaling 4
2188.23	1.6128	0.0436526	9.70601e-300	1.90996e-297	ENSMUSG00000046985	231225	Tapt1	transmembrane anterior posterior transformation 1
1836.36	1.81335	0.0492647	9.62996e-298	1.86938e-295	ENSMUSG00000038205	108097	Prkab2	protein kinase, AMP-activated, beta 2 non-catalytic subunit
10238.4	2.32602	0.0633661	2.78271e-296	5.32981e-294	ENSMUSG00000046844	270097	Vat1l	vesicle amine transport protein 1 like
2331.6	-1.3388	0.0364396	3.95512e-296	7.4757e-294	ENSMUSG00000027351	114715	Spred1	sprouty protein with EVH-1 domain 1, related sequence
8090.56	3.27005	0.0890641	5.05216e-296	9.42524e-294	ENSMUSG00000100241	20508	Slc18a3	solute carrier family 18 (vesicular monoamine), member 3
4337.88	1.11256	0.0302982	1.3562e-295	2.49767e-293	ENSMUSG00000035566	219228	Pcdh17	protocadherin 17
48704.1	1.55373	0.0426176	7.09796e-292	1.29066e-289	ENSMUSG00000051391	22628	Ywhag	tyrosine 3-monooxygenase/tryptophan 5-monooxygenase activation protein, gamma polypeptide
13550.6	2.41754	0.0664785	8.1453e-291	1.46259e-288	ENSMUSG00000036760	223604	Kcnk9	potassium channel, subfamily K, member 9
1198.01	-1.84695	0.0509575	7.92495e-289	1.40546e-286	ENSMUSG00000032412	11933	Atp1b3	ATPase, Na+/K+ transporting, beta 3 polypeptide
1184.47	-3.86404	0.10666	1.92208e-288	3.36715e-286	ENSMUSG00000008393	52502	Carhsp1	calcium regulated heat stable protein 1
1531.4	2.04871	0.0568586	1.33038e-285	2.30252e-283	ENSMUSG00000037872	13349	Ackr1	atypical chemokine receptor 1 (Duffy blood group)
2824.9	1.35835	0.0377524	3.83381e-284	6.55628e-282	ENSMUSG00000031709	71310	Tbc1d9	TBC1 domain family, member 9
6488.39	1.3358	0.0372368	1.91214e-282	3.23152e-280	ENSMUSG00000029765	243743	Plxna4	plexin A4
708.899	-4.14575	0.115744	3.59032e-282	5.99708e-280	ENSMUSG00000042613	229534	Pbxip1	pre B cell leukemia transcription factor interacting protein 1
4201.33	1.78452	0.0499512	1.20923e-280	1.99662e-278	ENSMUSG00000048899	194237	Rimkla	ribosomal modification protein rimK-like family member A
2839.41	3.08158	0.0862572	1.86961e-280	3.05193e-278	ENSMUSG00000042644	16440	Itpr3	inositol 1,4,5-triphosphate receptor 3
13442.1	0.636584	0.0178273	2.22591e-279	3.59272e-277	ENSMUSG00000027624	13821	Epb41l1	erythrocyte membrane protein band 4.1 like 1
2612.02	2.10979	0.0596694	3.61746e-275	5.77386e-273	ENSMUSG00000059714	14251	Flot1	flotillin 1
16251.3	1.09785	0.0310082	5.72196e-275	9.03252e-273	ENSMUSG00000032549	270192	Rab6b	RAB6B, member RAS oncogene family
3372.81	1.83754	0.0519953	9.44608e-275	1.47492e-272	ENSMUSG00000004040	20848	Stat3	signal transducer and activator of transcription 3
6462.15	2.25547	0.0640724	9.05124e-273	1.39808e-270	ENSMUSG00000034220	14733	Gpc1	glypican 1
435.835	-4.91483	0.140104	3.04228e-271	4.64918e-269	ENSMUSG00000021508	57266	Cxcl14	chemokine (C-X-C motif) ligand 14
1265.2	-3.93025	0.112231	9.10707e-270	1.37709e-267	ENSMUSG00000056515	106572	Rab31	RAB31, member RAS oncogene family
157627	2.61629	0.0747374	1.29067e-269	1.9313e-267	ENSMUSG00000022055	18039	Nefl	neurofilament, light polypeptide
9602.4	2.44131	0.0697885	2.43151e-269	3.60089e-267	ENSMUSG00000018340	11749	Anxa6	annexin A6
2589.05	2.09023	0.0597664	2.77986e-269	4.07476e-267	ENSMUSG00000042425	245643	Frmpd3	FERM and PDZ domain containing 3
13821.5	1.58942	0.0454309	4.60819e-269	6.68652e-267	ENSMUSG00000025964	23792	Adam23	a disintegrin and metallopeptidase domain 23
639.097	-3.98428	0.114188	7.31559e-268	1.05088e-265	ENSMUSG00000029999	21802	Tgfa	transforming growth factor alpha
17259	1.27807	0.0367044	3.2582e-266	4.63406e-264	ENSMUSG00000049313	20660	Sorl1	sortilin-related receptor, LDLR class A repeats-containing
28940.7	1.16163	0.0333682	5.6089e-266	7.89919e-264	ENSMUSG00000058297	94214	Spock2	sparc/osteonectin, cwcv and kazal-like domains proteoglycan 2
7130.01	2.27324	0.0657923	6.54357e-263	9.12606e-261	ENSMUSG00000045246	66733	Kcng4	potassium voltage-gated channel, subfamily G, member 4
2964.2	-1.88732	0.0547421	1.10658e-261	1.52846e-259	ENSMUSG00000015806	110391	Qdpr	quinoid dihydropteridine reductase
5766.25	1.93187	0.056061	1.81601e-261	2.48447e-259	ENSMUSG00000025366	23943	Esyt1	extended synaptotagmin-like protein 1
1923.04	1.19634	0.0347567	4.13499e-260	5.60369e-258	ENSMUSG00000036450	319594	Hif1an	hypoxia-inducible factor 1, alpha subunit inhibitor
1914.84	-4.29896	0.125547	2.99724e-258	4.02387e-256	ENSMUSG00000027562	12349	Car2	carbonic anhydrase 2
4789.34	-1.56848	0.045786	4.51032e-258	5.99914e-256	ENSMUSG00000057880	268860	Abat	4-aminobutyrate aminotransferase
878.987	-2.66192	0.0778044	1.18493e-257	1.56161e-255	ENSMUSG00000037999	212285	Arap2	ArfGAP with RhoGAP domain, ankyrin repeat and PH domain 2
7846.11	1.7322	0.0508084	8.05903e-256	1.05244e-253	ENSMUSG00000034088	110611	Hdlbp	high density lipoprotein (HDL) binding protein
10933.5	2.84838	0.0835931	1.72153e-255	2.22791e-253	ENSMUSG00000020917	104112	Acly	ATP citrate lyase
420.63	-3.05746	0.089764	3.21671e-255	4.12572e-253	ENSMUSG00000034353	51801	Ramp1	receptor (calcitonin) activity modifying protein 1
2698.32	-3.82883	0.11277	9.93346e-254	1.26278e-251	ENSMUSG00000005125	17988	Ndrg1	N-myc downstream regulated gene 1
2760.09	1.19617	0.0351909	1.00399e-253	1.26512e-251	ENSMUSG00000030084	18844	Plxna1	plexin A1
1284.96	1.62923	0.0479883	1.32515e-253	1.65528e-251	ENSMUSG00000032024	71566	Clmp	CXADR-like membrane protein
1649.08	2.82617	0.0838198	3.0539e-250	3.78184e-248	ENSMUSG00000007030	27762	Vwa7	von Willebrand factor A domain containing 7
4855.35	-2.70429	0.0803515	2.07697e-249	2.55005e-247	ENSMUSG00000027447	13010	Cst3	cystatin C
1869.88	2.23131	0.0664064	7.81558e-249	9.51448e-247	ENSMUSG00000058743	211480	Kcnj14	potassium inwardly-rectifying channel, subfamily J, member 14
21931.8	1.50312	0.0449023	1.713e-246	2.06784e-244	ENSMUSG00000051111	75209	Sv2c	synaptic vesicle glycoprotein 2c
996.203	-5.00882	0.150107	7.5811e-246	9.07521e-244	ENSMUSG00000039533	75104	Mmd2	monocyte to macrophage differentiation-associated 2
308.23	2.69537	0.0807553	2.36011e-245	2.8019e-243	ENSMUSG00000028214	14579	Gem	GTP binding protein (gene overexpressed in skeletal muscle)
1952.31	1.3946	0.0417538	2.78274e-245	3.27657e-243	ENSMUSG00000039512	224648	Uhrf1bp1	UHRF1 (ICBP90) binding protein 1
529.256	2.44064	0.073161	2.97244e-245	3.47147e-243	ENSMUSG00000027217	241556	Tspan18	tetraspanin 18
4986.56	1.61814	0.0484771	3.10476e-245	3.59677e-243	ENSMUSG00000026509	12334	Capn2	calpain 2
3146.37	1.52414	0.0458037	1.28617e-243	1.47807e-241	ENSMUSG00000052981	76980	Ube2ql1	ubiquitin-conjugating enzyme E2Q family-like 1
683.821	2.5103	0.0755226	1.81181e-243	2.0656e-241	ENSMUSG00000030089	71699	Slc41a3	solute carrier family 41, member 3
5660.28	1.755	0.0528921	1.64952e-242	1.86578e-240	ENSMUSG00000053693	56527	Mast1	microtubule associated serine/threonine kinase 1
320.52	3.25631	0.0984478	7.90728e-241	8.87407e-239	ENSMUSG00000001566	15285	Mnx1	motor neuron and pancreas homeobox 1
5369.84	-1.91282	0.057997	8.84474e-240	9.8492e-238	ENSMUSG00000037071	20249	Scd1	stearoyl-Coenzyme A desaturase 1
45746.4	1.0274	0.0311495	6.58216e-239	7.27328e-237	ENSMUSG00000001175	12313	Calm1	calmodulin 1
4205.29	1.13396	0.0344011	1.03524e-238	1.13521e-236	ENSMUSG00000033352	26398	Map2k4	mitogen-activated protein kinase kinase 4
2193.55	-4.71927	0.143545	1.40403e-238	1.52794e-236	ENSMUSG00000073680	320587	Tmem88b	transmembrane protein 88B
5442.04	1.91171	0.058136	2.23764e-238	2.41682e-236	ENSMUSG00000005338	94332	Cadm3	cell adhesion molecule 3
1870.52	-2.75209	0.08379	1.15194e-237	1.23489e-235	ENSMUSG00000054793	260299	Cadm4	cell adhesion molecule 4
3510.26	-2.5885	0.0789013	3.24811e-237	3.45622e-235	ENSMUSG00000024597	20496	Slc12a2	solute carrier family 12, member 2
2169.22	-3.85242	0.117527	1.01604e-236	1.0732e-234	ENSMUSG00000027858	70747	Tspan2	tetraspanin 2
2484.68	-2.3997	0.0741991	9.90901e-231	1.039e-228	ENSMUSG00000044340	98432	Phlpp1	PH domain and leucine rich repeat protein phosphatase 1
5938.68	1.87823	0.0581802	7.58264e-230	7.89309e-228	ENSMUSG00000022816	14314	Fstl1	follistatin-like 1
2035.95	-4.1333	0.128088	1.19467e-229	1.23464e-227	ENSMUSG00000027199	67092	Gatm	glycine amidinotransferase (L-arginine:glycine amidinotransferase)
5447.52	2.28562	0.0709362	4.43414e-229	4.54974e-227	ENSMUSG00000032232	68178	Cgnl1	cingulin-like 1
1247.96	3.0845	0.0957149	8.96492e-229	9.13341e-227	ENSMUSG00000017737	17395	Mmp9	matrix metallopeptidase 9
1962.98	2.6292	0.0818028	8.66701e-228	8.76772e-226	ENSMUSG00000040711	268396	Sh3pxd2b	SH3 and PX domains 2B
1344.97	-1.9283	0.0600389	1.44231e-227	1.44886e-225	ENSMUSG00000013275	98396	Slc41a1	solute carrier family 41, member 1
3954.87	1.57406	0.0491774	1.08744e-225	1.08479e-223	ENSMUSG00000041977	213498	Arhgef11	Rho guanine nucleotide exchange factor (GEF) 11
900.054	-2.82484	0.0884478	7.46899e-225	7.39945e-223	ENSMUSG00000000594	14667	Gm2a	GM2 ganglioside activator protein
12402	1.39573	0.0437526	5.42239e-224	5.33511e-222	ENSMUSG00000032011	21838	Thy1	thymus cell antigen 1, theta
4799.78	1.45727	0.045719	1.05319e-223	1.02919e-221	ENSMUSG00000007594	330790	Hapln4	hyaluronan and proteoglycan link protein 4
714.206	-4.48938	0.141277	5.41815e-223	5.2589e-221	ENSMUSG00000037010	30878	Apln	apelin
7038.12	1.78944	0.0563552	2.17165e-222	2.09368e-220	ENSMUSG00000026204	19275	Ptprn	protein tyrosine phosphatase, receptor type, N
4866.98	1.73092	0.0545649	6.58898e-222	6.31004e-220	ENSMUSG00000014498	237615	Ankrd52	ankyrin repeat domain 52
729.389	3.06593	0.0968115	4.80982e-221	4.5757e-219	ENSMUSG00000035745	170483	Grin3b	glutamate receptor, ionotropic, NMDA3B
678.254	2.25921	0.0714643	1.17878e-220	1.11402e-218	ENSMUSG00000026468	16872	Lhx4	LIM homeobox protein 4
35099.4	-4.67538	0.147994	1.50575e-220	1.41373e-218	ENSMUSG00000005089	20511	Slc1a2	solute carrier family 1 (glial high affinity glutamate transporter), member 2
1257.73	-2.49232	0.0790472	2.06034e-219	1.92187e-217	ENSMUSG00000024665	56473	Fads2	fatty acid desaturase 2
1739.22	2.03725	0.0646794	4.70134e-219	4.35708e-217	ENSMUSG00000049265	16527	Kcnk3	potassium channel, subfamily K, member 3
1791.6	1.09591	0.0347765	2.34384e-218	2.15829e-216	ENSMUSG00000027806	72033	Tsc22d2	TSC22 domain family, member 2
5894.01	1.46356	0.0464864	2.51168e-218	2.29811e-216	ENSMUSG00000020802	217342	Ube2o	ubiquitin-conjugating enzyme E2O
1298.05	1.29252	0.0411008	1.20299e-217	1.09373e-215	ENSMUSG00000029189	231238	Sel1l3	sel-1 suppressor of lin-12-like 3 (C. elegans)
3604.52	3.15246	0.100406	2.66187e-217	2.40489e-215	ENSMUSG00000029219	231290	Slc10a4	solute carrier family 10 (sodium/bile acid cotransporter family), member 4
1785.81	-3.86545	0.123235	4.93408e-217	4.42988e-215	ENSMUSG00000024140	13819	Epas1	endothelial PAS domain protein 1
3019.58	1.81524	0.0580139	4.55621e-216	4.06521e-214	ENSMUSG00000024900	12894	Cpt1a	carnitine palmitoyltransferase 1a, liver
1766.47	1.40194	0.0450089	1.09202e-213	9.68321e-212	ENSMUSG00000021772	69721	Nkiras1	NFKB inhibitor interacting Ras-like protein 1
1887.52	2.39056	0.077025	9.3639e-213	8.2523e-211	ENSMUSG00000022508	12053	Bcl6	B cell leukemia/lymphoma 6
1408.61	1.62241	0.0522803	2.19302e-212	1.9209e-210	ENSMUSG00000045975	207781	C2cd2	C2 calcium-dependent domain containing 2
1650.26	1.63693	0.0527888	4.41364e-212	3.84254e-210	ENSMUSG00000053166	104010	Cdh22	cadherin 22
3990.28	2.82142	0.0911654	2.5003e-211	2.16366e-209	ENSMUSG00000032231	12306	Anxa2	annexin A2
2960.94	1.08853	0.0351192	2.5482e-211	2.19191e-209	ENSMUSG00000027175	320554	Tcp11l1	t-complex 11 like 1
2559.8	1.0457	0.0337608	5.39203e-211	4.61051e-209	ENSMUSG00000048701	76551	Ccdc6	coiled-coil domain containing 6
1694.15	-3.76953	0.121903	5.59551e-211	4.75619e-209	ENSMUSG00000056966	118446	Gjc3	gap junction protein, gamma 3
5259.66	1.63196	0.0527734	6.27595e-211	5.30317e-209	ENSMUSG00000023915	94185	Tnfrsf21	tumor necrosis factor receptor superfamily, member 21
5242.98	2.31068	0.0748211	1.01639e-210	8.53827e-209	ENSMUSG00000031207	17698	Msn	moesin
728.156	-3.66186	0.118645	3.7135e-210	3.10142e-208	ENSMUSG00000069662	17118	Marcks	myristoylated alanine rich protein kinase C substrate
3704.86	1.4648	0.0475403	3.14745e-209	2.61348e-207	ENSMUSG00000024065	57440	Ehd3	EH-domain containing 3
2107.86	1.46654	0.0476915	2.06308e-208	1.70323e-206	ENSMUSG00000033900	213582	Map9	microtubule-associated protein 9
959.85	1.99148	0.0650208	2.71189e-207	2.22608e-205	ENSMUSG00000006576	20536	Slc4a3	solute carrier family 4 (anion exchanger), member 3
5802.68	1.7945	0.0585701	2.77933e-207	2.26847e-205	ENSMUSG00000038429	22225	Usp5	ubiquitin specific peptidase 5 (isopeptidase T)
393.151	-2.80364	0.0915865	7.77167e-207	6.30735e-205	ENSMUSG00000042363	216551	Lgalsl	lectin, galactoside binding-like
10192.1	1.30246	0.0425034	8.32713e-207	6.72018e-205	ENSMUSG00000025151	94275	Maged1	MAGE family member D1
3474.33	1.40587	0.045926	1.71961e-206	1.38001e-204	ENSMUSG00000031647	71306	Mfap3l	microfibrillar-associated protein 3-like
4756.33	1.51547	0.0495435	2.60952e-206	2.08254e-204	ENSMUSG00000038370	66425	Pcp4l1	Purkinje cell protein 4-like 1
2138.27	-1.79015	0.058573	2.87083e-206	2.27842e-204	ENSMUSG00000033713	71375	Foxn3	forkhead box N3
528.42	2.14474	0.0702359	4.10076e-206	3.23667e-204	ENSMUSG00000027978	19142	Prss12	protease, serine 12 neurotrypsin (motopsin)
1244.97	1.28045	0.0418935	9.93411e-206	7.798e-204	ENSMUSG00000035765	69190	Dym	dymeclin
852.881	2.77279	0.0908808	1.68401e-205	1.31472e-203	ENSMUSG00000024697	14675	Gna14	guanine nucleotide binding protein, alpha 14
1435.07	1.44896	0.0477135	2.61459e-203	2.0302e-201	ENSMUSG00000037224	231125	Zfyve28	zinc finger, FYVE domain containing 28
5775.09	1.59345	0.0525117	3.61126e-203	2.78902e-201	ENSMUSG00000024261	20983	Syt4	synaptotagmin IV
9190.11	-1.23502	0.0407328	1.89964e-202	1.45927e-200	ENSMUSG00000037852	12876	Cpe	carboxypeptidase E
346.701	-3.60187	0.118977	2.73463e-202	2.08952e-200	ENSMUSG00000005716	19293	Pvalb	parvalbumin
1617.4	1.59796	0.0527999	4.05219e-202	3.07988e-200	ENSMUSG00000024901	240518	Peli3	pellino 3
1155.14	1.35713	0.044819	4.74896e-202	3.59046e-200	ENSMUSG00000026430	54354	Rassf5	Ras association (RalGDS/AF-6) domain family member 5
1712.86	-1.66467	0.0550338	5.58746e-202	4.2023e-200	ENSMUSG00000024654	66514	Asrgl1	asparaginase like 1
1366.54	-4.05545	0.134627	1.64578e-200	1.23133e-198	ENSMUSG00000021703	218442	Serinc5	serine incorporator 5
1323.55	1.57373	0.0522084	1.69164e-200	1.25909e-198	ENSMUSG00000025192	93685	Entpd7	ectonucleoside triphosphate diphosphohydrolase 7
12151.3	1.27654	0.042429	2.01133e-199	1.48931e-197	ENSMUSG00000018965	22629	Ywhah	tyrosine 3-monooxygenase/tryptophan 5-monooxygenase activation protein, eta polypeptide
1813.24	-2.70259	0.0900174	3.96171e-199	2.91846e-197	ENSMUSG00000027087	16410	Itgav	integrin alpha V
2513.81	1.22573	0.0408063	9.79998e-199	7.18248e-197	ENSMUSG00000025178	84095	Pi4k2a	phosphatidylinositol 4-kinase type 2 alpha
2815.41	1.20186	0.0400777	4.55384e-198	3.3206e-196	ENSMUSG00000034613	319468	Ppm1h	protein phosphatase 1H (PP2C domain containing)
1283.2	-4.45785	0.149123	9.97791e-198	7.23902e-196	ENSMUSG00000037771	22348	Slc32a1	solute carrier family 32 (GABA vesicular transporter), member 1
1421.27	1.72568	0.0577432	2.64538e-197	1.90959e-195	ENSMUSG00000071379	53602	Hpcal1	hippocalcin-like 1
429.672	-3.70826	0.124067	2.67386e-197	1.9205e-195	ENSMUSG00000043391	72190	2510009E07Rik	RIKEN cDNA 2510009E07 gene
4191.02	2.24153	0.0751369	7.0938e-197	5.06977e-195	ENSMUSG00000039954	269019	Stk32a	serine/threonine kinase 32A
31242	2.33753	0.0783669	8.61937e-197	6.12956e-195	ENSMUSG00000062380	22152	Tubb3	tubulin, beta 3 class III
1702.1	-3.8589	0.129749	1.93231e-195	1.36737e-193	ENSMUSG00000048022	319832	Tmem229a	transmembrane protein 229A
1573.08	1.23035	0.0415001	1.14251e-193	8.04518e-192	ENSMUSG00000034189	72552	Hsdl1	hydroxysteroid dehydrogenase like 1
35045.3	-2.00803	0.0680424	1.06442e-192	7.45871e-191	ENSMUSG00000025203	20250	Scd2	stearoyl-Coenzyme A desaturase 2
1630.86	0.85798	0.0290012	1.41414e-192	9.86123e-191	ENSMUSG00000032042	67398	Srpr	signal recognition particle receptor ('docking protein')
487.869	-4.41198	0.149675	2.52321e-192	1.75101e-190	ENSMUSG00000022500	56722	Litaf	LPS-induced TN factor
20097.4	2.03954	0.0692197	4.10463e-192	2.83476e-190	ENSMUSG00000015222	17756	Map2	microtubule-associated protein 2
829.538	-2.15142	0.0730813	8.35698e-192	5.74392e-190	ENSMUSG00000075595	268469	Zfp652	zinc finger protein 652
8182.05	-4.61283	0.156783	9.89172e-192	6.76641e-190	ENSMUSG00000044708	16513	Kcnj10	potassium inwardly-rectifying channel, subfamily J, member 10
174384	3.57792	0.121495	1.40222e-191	9.54641e-190	ENSMUSG00000022054	18040	Nefm	neurofilament, medium polypeptide
1334.52	1.14965	0.039017	2.90969e-191	1.97159e-189	ENSMUSG00000009112	94044	Bcl2l13	BCL2-like 13 (apoptosis facilitator)
4213.81	-2.3562	0.0802348	7.65965e-191	5.16577e-189	ENSMUSG00000004558	29811	Ndrg2	N-myc downstream regulated gene 2
5689.44	1.41246	0.0480249	7.82825e-191	5.2548e-189	ENSMUSG00000031960	234734	Aars	alanyl-tRNA synthetase
1087.61	2.07061	0.0706241	2.94172e-190	1.96548e-188	ENSMUSG00000038244	320878	Mical2	microtubule associated monooxygenase, calponin and LIM domain containing 2
495.501	3.06846	0.104627	5.31064e-190	3.53182e-188	ENSMUSG00000022479	22337	Vdr	vitamin D (1,25-dihydroxyvitamin D3) receptor
3057.42	2.77547	0.0946983	7.11985e-190	4.71321e-188	ENSMUSG00000030847	29810	Bag3	BCL2-associated athanogene 3
2261.36	1.5498	0.052894	1.41653e-189	9.33413e-188	ENSMUSG00000003469	105653	Phyhip	phytanoyl-CoA hydroxylase interacting protein
1129.93	1.71908	0.0587078	1.55353e-189	1.01901e-187	ENSMUSG00000039838	242773	Slc45a1	solute carrier family 45, member 1
5400.83	1.76124	0.0602446	5.59349e-189	3.6523e-187	ENSMUSG00000060240	57754	Cend1	cell cycle exit and neuronal differentiation 1
1505.83	-4.09183	0.140201	1.96933e-188	1.28006e-186	ENSMUSG00000034714	117160	Ttyh2	tweety family member 2
6359.74	1.46949	0.0503606	6.02087e-188	3.89594e-186	ENSMUSG00000024862	16594	Klc2	kinesin light chain 2
1488.91	1.15656	0.0396448	1.53464e-187	9.88571e-186	ENSMUSG00000035629	100502698	Rubcn	RUN domain and cysteine-rich domain containing, Beclin 1-interacting protein
4620.91	2.69611	0.0928954	2.67776e-186	1.71723e-184	ENSMUSG00000023064	20618	Sncg	synuclein, gamma
575.104	3.03437	0.104531	3.26727e-186	2.08597e-184	ENSMUSG00000011171	22355	Vipr2	vasoactive intestinal peptide receptor 2
12447.2	1.18906	0.0409251	4.52544e-186	2.87646e-184	ENSMUSG00000037419	71946	Endod1	endonuclease domain containing 1
1827.69	-1.97635	0.0681747	4.80622e-186	3.04147e-184	ENSMUSG00000001313	11858	Rnd2	Rho family GTPase 2
34290.8	0.913059	0.0314652	2.14158e-185	1.34929e-183	ENSMUSG00000026576	11931	Atp1b1	ATPase, Na+/K+ transporting, beta 1 polypeptide
1115.82	-1.98202	0.0685789	6.13433e-185	3.84802e-183	ENSMUSG00000038740	72543	Mvb12b	multivesicular body subunit 12B
6829.03	1.61103	0.0557762	2.22114e-184	1.38725e-182	ENSMUSG00000033419	20616	Snap91	synaptosomal-associated protein 91
919.431	-1.91979	0.066812	8.31399e-183	5.17015e-181	ENSMUSG00000021665	15212	Hexb	hexosaminidase B
894.387	1.46095	0.0508043	1.30656e-182	8.08996e-181	ENSMUSG00000020701	270893	Tmem132e	transmembrane protein 132E
1885.62	1.31039	0.0455694	1.94515e-182	1.19923e-180	ENSMUSG00000051344	241075	Plekhm3	pleckstrin homology domain containing, family M, member 3
10876.9	1.42395	0.0495456	2.30123e-182	1.4127e-180	ENSMUSG00000022619	60597	Mapk8ip2	mitogen-activated protein kinase 8 interacting protein 2
1955.8	-2.15409	0.0751519	5.23208e-182	3.19825e-180	ENSMUSG00000027309	228602	Dnaaf9	dynein axonemal assembly factor 9
3133.85	-2.84408	0.0992656	1.47992e-181	9.00805e-180	ENSMUSG00000022708	56490	Zbtb20	zinc finger and BTB domain containing 20
530.676	-4.37398	0.152837	1.84462e-181	1.11806e-179	ENSMUSG00000023827	68262	Agpat4	1-acylglycerol-3-phosphate O-acyltransferase 4 (lysophosphatidic acid acyltransferase, delta)
1054.01	1.72212	0.060189	4.19601e-181	2.53259e-179	ENSMUSG00000042817	14255	Flt3	FMS-like tyrosine kinase 3
3714.48	1.81605	0.0635259	6.78601e-181	4.07871e-179	ENSMUSG00000032193	16835	Ldlr	low density lipoprotein receptor
2776.14	0.984428	0.0343707	1.0086e-180	6.03691e-179	ENSMUSG00000028426	19359	Rad23b	RAD23 homolog B, nucleotide excision repair protein
10090.4	1.64262	0.0574727	1.24137e-180	7.39927e-179	ENSMUSG00000054263	16880	Lifr	LIF receptor alpha
4017.61	1.03496	0.0361636	1.77861e-180	1.05577e-178	ENSMUSG00000029108	54216	Pcdh7	protocadherin 7
1545.58	-4.34588	0.15239	3.38205e-180	1.99931e-178	ENSMUSG00000036777	68743	Anln	anillin, actin binding protein
1468.64	-1.84036	0.0645565	6.32556e-180	3.72404e-178	ENSMUSG00000020864	71452	Ankrd40	ankyrin repeat domain 40
2919.05	1.16486	0.0408229	1.54487e-179	9.05797e-178	ENSMUSG00000024381	30948	Bin1	bridging integrator 1
1884.48	1.8126	0.0637156	3.64447e-179	2.12816e-177	ENSMUSG00000026014	77300	Raph1	Ras association (RalGDS/AF-6) and pleckstrin homology domains 1
950.189	-3.70181	0.130128	5.17855e-179	3.01174e-177	ENSMUSG00000024593	70417	Megf10	multiple EGF-like-domains 10
587.822	2.34779	0.0826568	9.25224e-179	5.35921e-177	ENSMUSG00000026399	13136	Cd55	CD55 molecule, decay accelerating factor for complement
487.901	2.33021	0.0822242	5.67114e-178	3.27172e-176	ENSMUSG00000002633	20423	Shh	sonic hedgehog
3887.17	1.1535	0.0406094	6.35723e-178	3.65287e-176	ENSMUSG00000052928	269037	Ctif	CBP80/20-dependent translation initiation factor
2305.66	1.10882	0.0390415	7.74569e-178	4.43294e-176	ENSMUSG00000047842	68203	Diras2	DIRAS family, GTP-binding RAS-like 2
2383.92	1.93156	0.0682417	1.73435e-177	9.88648e-176	ENSMUSG00000032452	64085	Clstn2	calsyntenin 2
741.329	1.78505	0.0631387	5.81052e-177	3.29913e-175	ENSMUSG00000020312	216148	Shc2	SHC (Src homology 2 domain containing) transforming protein 2
687.129	-2.28429	0.0808605	7.01055e-177	3.96482e-175	ENSMUSG00000038481	78334	Cdk19	cyclin-dependent kinase 19
4748.09	1.50219	0.0531115	8.52406e-177	4.80189e-175	ENSMUSG00000030209	14812	Grin2b	glutamate receptor, ionotropic, NMDA2B (epsilon 2)
2578.82	1.44248	0.0510676	2.86583e-176	1.60811e-174	ENSMUSG00000032435	235661	Dync1li1	dynein cytoplasmic 1 light intermediate chain 1
1033.91	1.29157	0.0458087	1.80064e-175	1.00647e-173	ENSMUSG00000032306	110119	Mpi	mannose phosphate isomerase
1051.85	-2.06949	0.0736107	3.25773e-175	1.81385e-173	ENSMUSG00000030788	67150	Rnf141	ring finger protein 141
818.607	-2.55302	0.0908315	5.20765e-175	2.88833e-173	ENSMUSG00000078429	52468	Ctdsp2	CTD (carboxy-terminal domain, RNA polymerase II, polypeptide A) small phosphatase 2
917.533	2.6696	0.0951659	2.88985e-174	1.59664e-172	ENSMUSG00000035834	67486	Polr3g	polymerase (RNA) III (DNA directed) polypeptide G
328.292	-5.06176	0.180903	4.88234e-174	2.68716e-172	ENSMUSG00000044080	20193	S100a1	S100 calcium binding protein A1
6391.72	1.63886	0.0584987	1.14313e-173	6.26756e-172	ENSMUSG00000021194	12652	Chga	chromogranin A
429.406	-3.27037	0.116735	1.28207e-173	7.00262e-172	ENSMUSG00000003974	108069	Grm3	glutamate receptor, metabotropic 3
17375.4	-4.50442	0.161135	2.30891e-173	1.25635e-171	ENSMUSG00000007097	98660	Atp1a2	ATPase, Na+/K+ transporting, alpha 2 polypeptide
1684.83	2.70037	0.0965686	3.64167e-173	1.97406e-171	ENSMUSG00000036578	57780	Fxyd7	FXYD domain-containing ion transport regulator 7
3038.73	1.18532	0.0423197	4.30626e-173	2.32554e-171	ENSMUSG00000039000	100763	Ube3c	ubiquitin protein ligase E3C
2468.77	-1.53249	0.0548032	6.4799e-173	3.48628e-171	ENSMUSG00000041417	18708	Pik3r1	phosphoinositide-3-kinase regulatory subunit 1
20570.4	-1.82189	0.0652662	1.23563e-172	6.62307e-171	ENSMUSG00000026473	14645	Glul	glutamate-ammonia ligase (glutamine synthetase)
282.834	-3.79034	0.135797	1.75195e-172	9.35566e-171	ENSMUSG00000032434	67213	Cmtm6	CKLF-like MARVEL transmembrane domain containing 6
265.209	-4.45526	0.159831	2.27155e-172	1.20855e-170	ENSMUSG00000025978	74013	Rftn2	raftlin family member 2
434.401	-3.35621	0.120598	2.27419e-171	1.20549e-169	ENSMUSG00000025584	18584	Pde8a	phosphodiesterase 8A
9865.97	1.90304	0.0685582	8.35598e-171	4.413e-169	ENSMUSG00000013921	76686	Clip3	CAP-GLY domain containing linker protein 3
367.853	-4.58233	0.165535	4.10141e-170	2.15812e-168	ENSMUSG00000040848	108735	Sft2d2	SFT2 domain containing 2
577.611	-2.08586	0.07533	4.52524e-170	2.37245e-168	ENSMUSG00000041935	106064	Rimoc1	RAB7A interacting MON1-CCZ1 complex subunit 1
1687.3	-0.845588	0.0304408	4.82155e-170	2.5186e-168	ENSMUSG00000032199	28015	Polr2m	polymerase (RNA) II (DNA directed) polypeptide M
743.699	-3.82515	0.138079	5.7442e-170	2.98969e-168	ENSMUSG00000038156	233744	Spon1	spondin 1, (f-spondin) extracellular matrix protein
539.551	-3.3401	0.120591	8.93242e-170	4.63228e-168	ENSMUSG00000022790	207683	Igsf11	immunoglobulin superfamily, member 11
4521.96	1.27873	0.0461389	1.27388e-169	6.58249e-168	ENSMUSG00000055254	18212	Ntrk2	neurotrophic tyrosine kinase, receptor, type 2
3888.87	1.14504	0.0413359	2.49932e-169	1.28684e-167	ENSMUSG00000024277	212307	Mapre2	microtubule-associated protein, RP/EB family, member 2
18806.3	1.04356	0.0376853	3.93504e-169	2.01882e-167	ENSMUSG00000034187	18195	Nsf	N-ethylmaleimide sensitive fusion protein
3800.5	1.5836	0.0573514	9.94725e-169	5.08513e-167	ENSMUSG00000029804	73998	Herc3	hect domain and RLD 3
547.594	-2.42355	0.0878729	1.06336e-168	5.41672e-167	ENSMUSG00000022358	67731	Fbxo32	F-box protein 32
9865.75	1.17618	0.0426128	3.66444e-168	1.86006e-166	ENSMUSG00000025855	19085	Prkar1b	protein kinase, cAMP dependent regulatory, type I beta
306.17	-2.93566	0.106695	1.2283e-167	6.21287e-166	ENSMUSG00000071757	387609	Zhx2	zinc fingers and homeoboxes 2
3247.37	0.73416	0.0266266	1.64527e-167	8.29276e-166	ENSMUSG00000030327	67602	Necap1	NECAP endocytosis associated 1
779.345	1.28749	0.046809	4.09145e-167	2.05502e-165	ENSMUSG00000026672	71648	Optn	optineurin
4128.6	1.48377	0.0540758	1.55373e-166	7.77675e-165	ENSMUSG00000021301	94253	Hecw1	HECT, C2 and WW domain containing E3 ubiquitin protein ligase 1
1277.69	1.0592	0.0385651	1.98702e-166	9.91098e-165	ENSMUSG00000027796	55994	Smad9	SMAD family member 9
257.916	-4.17437	0.152471	2.99672e-166	1.48954e-164	ENSMUSG00000001761	319757	Smo	smoothened, frizzled class receptor
2133.57	1.38862	0.0506542	3.94304e-166	1.95317e-164	ENSMUSG00000033316	231605	Galnt9	polypeptide N-acetylgalactosaminyltransferase 9
2352.71	1.48069	0.0540889	8.93877e-166	4.41256e-164	ENSMUSG00000038552	64339	Fndc4	fibronectin type III domain containing 4
1292.11	-4.62828	0.169597	1.86763e-165	9.18784e-164	ENSMUSG00000039904	14763	Gpr37	G protein-coupled receptor 37
2777.05	1.45493	0.0532064	2.18207e-165	1.06981e-163	ENSMUSG00000051335	328232	Gfod1	glucose-fructose oxidoreductase domain containing 1
14979.7	0.981369	0.0358482	2.64736e-165	1.29351e-163	ENSMUSG00000031144	20977	Syp	synaptophysin
443.852	1.85178	0.0678933	5.5438e-165	2.69955e-163	ENSMUSG00000022758	18440	P2rx6	purinergic receptor P2X, ligand-gated ion channel, 6
3917.01	1.5426	0.0565115	6.39582e-165	3.10392e-163	ENSMUSG00000019726	17101	Lyst	lysosomal trafficking regulator
20228.1	1.08748	0.0397912	7.7695e-165	3.75787e-163	ENSMUSG00000016349	13628	Eef1a2	eukaryotic translation elongation factor 1 alpha 2
734.142	2.43532	0.0896272	7.87341e-164	3.79535e-162	ENSMUSG00000022180	50934	Slc7a8	solute carrier family 7 (cationic amino acid transporter, y+ system), member 8
3025.14	0.851328	0.0312509	1.24796e-163	5.99562e-162	ENSMUSG00000034958	16467	Atcay	ataxia, cerebellar, Cayman type
488.045	-3.87447	0.143024	1.0931e-162	5.23413e-161	ENSMUSG00000013523	76960	Bcas1	brain enriched myelin associated protein 1
10329.2	1.11204	0.0410837	9.29749e-162	4.43716e-160	ENSMUSG00000018865	29859	Sult4a1	sulfotransferase family 4A, member 1
5453.48	1.49853	0.0554361	9.84487e-162	4.68283e-160	ENSMUSG00000046442	320472	Ppm1e	protein phosphatase 1E (PP2C domain containing)
599.086	-2.6522	0.0982416	1.20665e-161	5.72063e-160	ENSMUSG00000000708	18519	Kat2b	K(lysine) acetyltransferase 2B
1725.68	1.11194	0.0410981	1.28486e-161	6.07139e-160	ENSMUSG00000020720	66997	Psmd12	proteasome (prosome, macropain) 26S subunit, non-ATPase, 12
268.468	3.16725	0.117258	1.31647e-161	6.20036e-160	ENSMUSG00000032318	104360	Isl2	insulin related protein 2 (islet 2)
3148.07	1.98877	0.0737121	1.33832e-161	6.28269e-160	ENSMUSG00000002319	75751	Ipo4	importin 4
3529.12	2.02073	0.074912	1.49906e-161	7.01431e-160	ENSMUSG00000031391	16728	L1cam	L1 cell adhesion molecule
1863.59	0.884926	0.0327036	1.71704e-161	8.00821e-160	ENSMUSG00000060212	270109	Pcnx2	pecanex homolog 2
318.154	-2.89001	0.107082	2.00545e-161	9.32309e-160	ENSMUSG00000042115	213417	Klhdc8a	kelch domain containing 8A
4092.51	2.08298	0.0774768	1.59595e-160	7.39542e-159	ENSMUSG00000011256	11492	Adam19	a disintegrin and metallopeptidase domain 19 (meltrin beta)
3257.68	1.09236	0.0405909	6.58514e-160	3.04166e-158	ENSMUSG00000039740	56737	Alg2	asparagine-linked glycosylation 2 (alpha-1,3-mannosyltransferase)
754.962	1.38992	0.0517306	1.07356e-159	4.94286e-158	ENSMUSG00000037151	216011	Lrrc20	leucine rich repeat containing 20
1907.51	0.852826	0.0316963	1.11342e-159	5.11e-158	ENSMUSG00000029684	73178	Wasl	WASP like actin nucleation promoting factor
1999.05	1.2129	0.0451531	1.94587e-159	8.90206e-158	ENSMUSG00000056553	19276	Ptprn2	protein tyrosine phosphatase, receptor type, N polypeptide 2
393.455	-3.33836	0.124497	2.60072e-159	1.18601e-157	ENSMUSG00000029648	14254	Flt1	FMS-like tyrosine kinase 1
2069.61	2.10235	0.078503	2.63518e-159	1.19792e-157	ENSMUSG00000031561	23965	Tenm3	teneurin transmembrane protein 3
1795.78	1.27046	0.0473302	2.88229e-159	1.30612e-157	ENSMUSG00000089945	677884	Pakap	paralemmin A kinase anchor protein
357.886	-4.16329	0.155532	4.62203e-159	2.08791e-157	ENSMUSG00000020183	70574	Cpm	carboxypeptidase M
7587.98	1.58579	0.0592417	9.45603e-159	4.25818e-157	ENSMUSG00000030000	11519	Add2	adducin 2 (beta)
2940.94	1.15929	0.0433083	2.6987e-158	1.21146e-156	ENSMUSG00000054843	226255	Atrnl1	attractin like 1
5437.53	1.02234	0.0382291	7.0119e-158	3.13788e-156	ENSMUSG00000025228	54130	Actr1a	ARP1 actin-related protein 1A, centractin alpha
890.41	1.38204	0.0517561	9.28147e-158	4.14063e-156	ENSMUSG00000038417	103199	Fig4	FIG4 phosphoinositide 5-phosphatase
915.598	1.9517	0.0732312	9.66276e-158	4.29739e-156	ENSMUSG00000070866	241514	Zfp804a	zinc finger protein 804A
12870.4	1.82899	0.0686168	1.0749e-157	4.76572e-156	ENSMUSG00000001525	22154	Tubb5	tubulin, beta 5 class I
433.819	-2.48522	0.0932687	1.18969e-157	5.25841e-156	ENSMUSG00000046312	329828	Myorg	myogenesis regulating glycosidase (putative)
3496.67	1.30173	0.0488043	2.55589e-157	1.12624e-155	ENSMUSG00000019796	237253	Lrp11	low density lipoprotein receptor-related protein 11
1148.67	-1.19754	0.0448908	2.88922e-157	1.26922e-155	ENSMUSG00000002341	13004	Ncan	neurocan
2267.11	2.60444	0.0978751	3.64848e-157	1.59788e-155	ENSMUSG00000001507	16400	Itga3	integrin alpha 3
5880.47	0.932451	0.0349763	7.42488e-157	3.24189e-155	ENSMUSG00000058230	232906	Arhgap35	Rho GTPase activating protein 35
2353.76	0.885208	0.033211	9.1947e-157	4.00248e-155	ENSMUSG00000056076	27979	Eif3b	eukaryotic translation initiation factor 3, subunit B
7402.17	-1.06351	0.0399367	1.31814e-156	5.72055e-155	ENSMUSG00000034377	68842	Tulp4	tubby like protein 4
358.102	-4.37824	0.165031	2.04624e-156	8.85369e-155	ENSMUSG00000028955	22319	Vamp3	vesicle-associated membrane protein 3
3392.32	-2.25556	0.0850354	2.41431e-156	1.04149e-154	ENSMUSG00000021573	72948	Tppp	tubulin polymerization promoting protein
1576.35	1.6187	0.06108	1.06748e-155	4.59111e-154	ENSMUSG00000054720	100604	Lrrc8c	leucine rich repeat containing 8 family, member C
3980.63	0.887477	0.0334683	3.52583e-155	1.5119e-153	ENSMUSG00000019210	11973	Atp6v1e1	ATPase, H+ transporting, lysosomal V1 subunit E1
3980.93	1.11817	0.0422076	4.64001e-155	1.98374e-153	ENSMUSG00000002957	11772	Ap2a2	adaptor-related protein complex 2, alpha 2 subunit
273.277	-4.03506	0.152814	8.47501e-155	3.61257e-153	ENSMUSG00000061740	56448	Cyp2d22	cytochrome P450, family 2, subfamily d, polypeptide 22
3077.65	1.29375	0.0489401	1.42239e-154	6.04516e-153	ENSMUSG00000020785	55984	Camkk1	calcium/calmodulin-dependent protein kinase kinase 1, alpha
1983.84	-2.0811	0.0790613	5.17279e-154	2.19195e-152	ENSMUSG00000031517	234267	Gpm6a	glycoprotein m6a
8971.91	1.27767	0.0484741	1.14983e-153	4.85805e-152	ENSMUSG00000030058	54161	Copg1	coatomer protein complex, subunit gamma 1
1219.32	-4.20647	0.159993	1.37809e-153	5.80535e-152	ENSMUSG00000046240	72927	Hepacam	hepatocyte cell adhesion molecule
769.658	1.27176	0.0483033	2.51545e-153	1.05656e-151	ENSMUSG00000009293	22213	Ube2g2	ubiquitin-conjugating enzyme E2G 2
6133.44	2.33023	0.0887337	2.71026e-153	1.13507e-151	ENSMUSG00000025089	14585	Gfra1	glial cell line derived neurotrophic factor family receptor alpha 1
2499.23	-3.57438	0.136015	3.58198e-153	1.49579e-151	ENSMUSG00000031748	14681	Gnao1	guanine nucleotide binding protein, alpha O
490.285	2.88245	0.109703	3.6761e-153	1.53064e-151	ENSMUSG00000021803	170677	Cdhr1	cadherin-related family member 1
12437.6	1.99018	0.0758469	5.00023e-153	2.07596e-151	ENSMUSG00000036752	227613	Tubb4b	tubulin, beta 4B class IVB
307.663	-3.49415	0.133043	5.72568e-153	2.3703e-151	ENSMUSG00000020646	67216	Mboat2	membrane bound O-acyltransferase domain containing 2
1144.45	1.72104	0.0655938	8.66096e-153	3.57513e-151	ENSMUSG00000062937	66902	Mtap	methylthioadenosine phosphorylase
2042.06	1.43062	0.0545332	2.0541e-152	8.45477e-151	ENSMUSG00000023830	16004	Igf2r	insulin-like growth factor 2 receptor
2218.53	1.0283	0.0391612	2.64958e-152	1.08746e-150	ENSMUSG00000029103	16976	Lrpap1	low density lipoprotein receptor-related protein associated protein 1
455.977	-2.687	0.10262	3.16486e-152	1.29525e-150	ENSMUSG00000048148	319555	Nwd1	NACHT and WD repeat domain containing 1
436.466	-3.82915	0.146282	4.32189e-152	1.76375e-150	ENSMUSG00000026626	226849	Ppp2r5a	protein phosphatase 2, regulatory subunit B', alpha
679.046	-2.4211	0.0927309	1.59577e-151	6.49382e-150	ENSMUSG00000025880	17131	Smad7	SMAD family member 7
8503.87	1.11267	0.0424966	1.6455e-151	6.67728e-150	ENSMUSG00000015837	18412	Sqstm1	sequestosome 1
441.216	1.5696	0.0600636	2.03676e-151	8.2417e-150	ENSMUSG00000030350	381813	Prmt8	protein arginine N-methyltransferase 8
4756.49	1.22051	0.0466879	3.82019e-151	1.54149e-149	ENSMUSG00000056602	320365	Fry	FRY microtubule binding protein
3957.55	1.57775	0.0605473	1.38456e-150	5.57122e-149	ENSMUSG00000020198	11776	Ap3d1	adaptor-related protein complex 3, delta 1 subunit
47631.1	1.71305	0.0658039	1.89201e-150	7.59181e-149	ENSMUSG00000018707	13424	Dync1h1	dynein cytoplasmic 1 heavy chain 1
2808.36	2.75618	0.105892	2.02538e-150	8.10435e-149	ENSMUSG00000004951	15507	Hspb1	heat shock protein 1
3025.74	1.17654	0.0451691	4.94698e-150	1.97398e-148	ENSMUSG00000015599	106763	Ttbk1	tau tubulin kinase 1
255.932	-3.46628	0.133306	5.34134e-150	2.12544e-148	ENSMUSG00000044576	242915	Garem2	GRB2 associated regulator of MAPK1 subtype 2
3837.91	0.989479	0.0379799	6.12935e-150	2.43227e-148	ENSMUSG00000025410	69654	Dctn2	dynactin 2
1869.51	1.51147	0.0581551	9.6649e-150	3.82469e-148	ENSMUSG00000038807	380711	Rap1gap2	RAP1 GTPase activating protein 2
963.558	1.0691	0.0411036	1.62791e-149	6.42445e-148	ENSMUSG00000028920	213499	Fbxo42	F-box protein 42
636.312	2.52833	0.0974888	1.70842e-149	6.72368e-148	ENSMUSG00000022206	18162	Npr3	natriuretic peptide receptor 3
1044.77	1.52131	0.0586187	2.50624e-149	9.83664e-148	ENSMUSG00000051339	243219	2900026A02Rik	RIKEN cDNA 2900026A02 gene
5405.4	1.04438	0.0401827	2.79266e-149	1.09309e-147	ENSMUSG00000045039	269878	Megf8	multiple EGF-like-domains 8
464.342	-2.8461	0.109927	8.03087e-149	3.13487e-147	ENSMUSG00000040234	67623	Tm7sf3	transmembrane 7 superfamily member 3
1748.53	-2.61067	0.100976	1.52822e-148	5.94927e-147	ENSMUSG00000015305	70097	Sash1	SAM and SH3 domain containing 1
2045.82	-4.45671	0.172517	1.5639e-148	6.07175e-147	ENSMUSG00000003934	13643	Efnb3	ephrin B3
10737.7	-4.61386	0.178831	3.00735e-148	1.16443e-146	ENSMUSG00000020932	14580	Gfap	glial fibrillary acidic protein
5937.75	1.01097	0.0390487	4.07374e-148	1.5731e-146	ENSMUSG00000028020	14658	Glrb	glycine receptor, beta subunit
542.554	1.69034	0.0655519	1.19906e-147	4.61783e-146	ENSMUSG00000024867	18719	Pip5k1b	phosphatidylinositol-4-phosphate 5-kinase, type 1 beta
1397.18	0.88545	0.0342727	2.02957e-147	7.79539e-146	ENSMUSG00000005981	68015	Trap1	TNF receptor-associated protein 1
3889.01	0.978187	0.0379485	8.05503e-147	3.08561e-145	ENSMUSG00000022752	28185	Tomm70a	translocase of outer mitochondrial membrane 70A
1556.63	1.22348	0.0475169	1.04647e-146	3.99802e-145	ENSMUSG00000047747	330812	Rnf150	ring finger protein 150
1484.72	-2.6086	0.101568	1.25843e-146	4.79504e-145	ENSMUSG00000030500	140919	Slc17a6	solute carrier family 17 (sodium-dependent inorganic phosphate cotransporter), member 6
1463.37	1.10621	0.0429623	1.33142e-146	5.05973e-145	ENSMUSG00000007021	20974	Syngr3	synaptogyrin 3
1213.03	-3.69611	0.143904	1.72131e-146	6.52419e-145	ENSMUSG00000021340	14756	Gpld1	glycosylphosphatidylinositol specific phospholipase D1
418.099	-2.73381	0.106486	1.94562e-146	7.35496e-145	ENSMUSG00000020733	26941	Slc9a3r1	solute carrier family 9 (sodium/hydrogen exchanger), member 3 regulator 1
3874.83	2.08702	0.0815242	7.44194e-146	2.80586e-144	ENSMUSG00000023328	11423	Ache	acetylcholinesterase
1089.46	1.48754	0.0580753	1.72395e-145	6.48287e-144	ENSMUSG00000036078	18391	Sigmar1	sigma non-opioid intracellular receptor 1
3576.89	1.13237	0.0441722	2.321e-145	8.70528e-144	ENSMUSG00000030357	14228	Fkbp4	FK506 binding protein 4
948.984	1.62751	0.0636187	2.67783e-145	1.00175e-143	ENSMUSG00000015342	22439	Xk	X-linked Kx blood group
836.353	-2.99489	0.117256	7.43748e-145	2.77505e-143	ENSMUSG00000015714	76893	Cers2	ceramide synthase 2
914.637	-3.20616	0.125576	1.05314e-144	3.91925e-143	ENSMUSG00000029581	14086	Fscn1	fascin actin-bundling protein 1
257.997	-3.32885	0.130806	8.74077e-144	3.24447e-142	ENSMUSG00000026176	227292	Ctdsp1	CTD (carboxy-terminal domain, RNA polymerase II, polypeptide A) small phosphatase 1
1409.04	-1.28089	0.0502791	1.00386e-143	3.71661e-142	ENSMUSG00000028081	20091	Rps3a1	ribosomal protein S3A1
1768.1	1.87499	0.0740813	1.56611e-142	5.78334e-141	ENSMUSG00000041959	20194	S100a10	S100 calcium binding protein A10 (calpactin)
3524.21	1.40447	0.0554046	1.84248e-142	6.78647e-141	ENSMUSG00000059003	14811	Grin2a	glutamate receptor, ionotropic, NMDA2A (epsilon 1)
670.025	-2.68717	0.106264	3.40192e-142	1.24984e-140	ENSMUSG00000030111	232345	A2m	alpha-2-macroglobulin
1221.75	3.69604	0.146362	1.04472e-141	3.8284e-140	ENSMUSG00000047986	74337	Palm3	paralemmin 3
1270.16	1.08155	0.0427483	1.31615e-141	4.8108e-140	ENSMUSG00000056812	20451	St8sia3	ST8 alpha-N-acetyl-neuraminide alpha-2,8-sialyltransferase 3
257.287	-2.74257	0.108718	1.72304e-141	6.28209e-140	ENSMUSG00000032038	20443	St3gal4	ST3 beta-galactoside alpha-2,3-sialyltransferase 4
4450.51	1.4564	0.057717	3.02796e-141	1.10118e-139	ENSMUSG00000022257	114128	Laptm4b	lysosomal-associated protein transmembrane 4B
1408.62	-1.49672	0.0593435	3.69856e-141	1.34166e-139	ENSMUSG00000037172	243780	Dennd11	DENN domain containing 11
2149.15	1.61525	0.0641071	5.0838e-141	1.83952e-139	ENSMUSG00000038301	71982	Snx10	sorting nexin 10
2057.76	-4.7583	0.189418	8.18975e-141	2.95592e-139	ENSMUSG00000026830	77767	Ermn	ermin, ERM-like protein
1756.07	-4.88891	0.194749	1.03486e-140	3.72576e-139	ENSMUSG00000076439	17441	Mog	myelin oligodendrocyte glycoprotein
422.284	-3.61683	0.143873	1.9609e-140	7.04207e-139	ENSMUSG00000029084	12494	Cd38	CD38 antigen
1425.69	1.72648	0.0687426	2.94856e-140	1.05466e-138	ENSMUSG00000040648	227399	Ppip5k2	diphosphoinositol pentakisphosphate kinase 2
4414.83	-1.37123	0.0545181	2.95144e-140	1.05466e-138	ENSMUSG00000060657	223989	Marf1	meiosis regulator and mRNA stability 1
1708.19	1.19947	0.0476617	3.07868e-140	1.0974e-138	ENSMUSG00000031558	20563	Slit2	slit guidance ligand 2
2665.97	0.726961	0.0288668	4.24639e-140	1.50989e-138	ENSMUSG00000032777	233863	Gtf3c1	general transcription factor III C 1
1130.92	-1.4066	0.0559943	5.96405e-140	2.1154e-138	ENSMUSG00000063297	233271	Luzp2	leucine zipper protein 2
1011.63	-4.24874	0.169635	1.04738e-139	3.70581e-138	ENSMUSG00000031983	69551	2310022B05Rik	RIKEN cDNA 2310022B05 gene
556.403	1.55663	0.0620664	1.10534e-139	3.90128e-138	ENSMUSG00000023009	380969	Nckap5l	NCK-associated protein 5-like
4330.05	-1.20137	0.0478434	1.24553e-139	4.38529e-138	ENSMUSG00000023010	110213	Tmbim6	transmembrane BAX inhibitor motif containing 6
863.002	1.77802	0.0709739	1.2852e-139	4.5139e-138	ENSMUSG00000024410	76482	Rmc1	regulator of MON1-CCZ1
1557.36	1.46967	0.0585976	1.36816e-139	4.79358e-138	ENSMUSG00000029408	56325	Abcb9	ATP-binding cassette, sub-family B (MDR/TAP), member 9
1943.05	1.11731	0.0445284	2.36359e-139	8.26106e-138	ENSMUSG00000032262	83603	Elovl4	elongation of very long chain fatty acids (FEN1/Elo2, SUR4/Elo3, yeast)-like 4
440.696	-4.09906	0.163928	3.50337e-139	1.2215e-137	ENSMUSG00000024197	66905	Plin3	perilipin 3
1374.85	2.22747	0.0891326	3.70662e-139	1.28924e-137	ENSMUSG00000032657	68521	Fam189b	family with sequence similarity 189, member B
2512.13	1.21774	0.0486606	1.02462e-138	3.55522e-137	ENSMUSG00000064225	75552	Paqr9	progestin and adipoQ receptor family member IX
1659.2	-1.76903	0.0708624	1.1714e-138	4.05473e-137	ENSMUSG00000024413	18145	Npc1	NPC intracellular cholesterol transporter 1
2246.15	0.818412	0.0327023	1.98973e-138	6.87078e-137	ENSMUSG00000031993	102607	Snx19	sorting nexin 19
345.083	-3.86022	0.154866	3.29307e-138	1.13441e-136	ENSMUSG00000004035	68312	Gstm7	glutathione S-transferase, mu 7
12470.2	1.39853	0.0560522	4.30461e-138	1.47932e-136	ENSMUSG00000033059	110078	Pygb	brain glycogen phosphorylase
2918.53	3.19732	0.128492	1.34585e-137	4.61413e-136	ENSMUSG00000068220	16852	Lgals1	lectin, galactose binding, soluble 1
8566.25	-3.57029	0.143771	4.2558e-137	1.45559e-135	ENSMUSG00000041329	11932	Atp1b2	ATPase, Na+/K+ transporting, beta 2 polypeptide
997.13	1.55096	0.0624915	7.68653e-137	2.62273e-135	ENSMUSG00000029436	23948	Mmp17	matrix metallopeptidase 17
2001.07	1.19528	0.0481273	1.21884e-136	4.14897e-135	ENSMUSG00000001380	15115	Hars	histidyl-tRNA synthetase
639.395	-2.89816	0.116973	1.61954e-136	5.49992e-135	ENSMUSG00000060002	212862	Chpt1	choline phosphotransferase 1
1200.1	-2.89497	0.116854	1.69402e-136	5.73929e-135	ENSMUSG00000032562	14678	Gnai2	guanine nucleotide binding protein (G protein), alpha inhibiting 2
4066.62	-1.0931	0.0440791	3.78532e-136	1.27944e-134	ENSMUSG00000029120	269643	Ppp2r2c	protein phosphatase 2, regulatory subunit B, gamma
644.638	-2.8273	0.114306	4.22759e-136	1.42557e-134	ENSMUSG00000027878	18129	Notch2	notch 2
961.455	1.59026	0.0642784	4.87161e-136	1.63889e-134	ENSMUSG00000079184	75339	Mphosph8	M-phase phosphoprotein 8
1545.93	-3.17718	0.128692	1.70603e-135	5.72595e-134	ENSMUSG00000060012	16554	Kif13b	kinesin family member 13B
2526.59	0.863709	0.0349062	2.13781e-135	7.15843e-134	ENSMUSG00000018547	108083	Pip4k2b	phosphatidylinositol-5-phosphate 4-kinase, type II, beta
12141.1	1.74148	0.0706183	2.37865e-135	7.94635e-134	ENSMUSG00000058672	22151	Tubb2a	tubulin, beta 2A class IIA
4907.82	-1.57053	0.0637147	4.83709e-135	1.61218e-133	ENSMUSG00000020331	15166	Hcn2	hyperpolarization-activated, cyclic nucleotide-gated K+ 2
505.839	-3.74561	0.15213	7.10063e-135	2.36112e-133	ENSMUSG00000030495	53896	Slc7a10	solute carrier family 7 (cationic amino acid transporter, y+ system), member 10
720.192	-1.62704	0.0661281	1.26836e-134	4.20787e-133	ENSMUSG00000021375	16553	Kif13a	kinesin family member 13A
777.164	1.28188	0.05206	1.94422e-134	6.43518e-133	ENSMUSG00000050052	72148	Tdrp	testis development related protein
1381.46	-3.67418	0.149561	2.90761e-134	9.6018e-133	ENSMUSG00000053646	235611	Plxnb1	plexin B1
8751.85	1.07518	0.0437177	6.19574e-134	2.04133e-132	ENSMUSG00000052949	217340	Rnf157	ring finger protein 157
1516.12	-2.18048	0.0889953	6.83855e-134	2.24796e-132	ENSMUSG00000029636	245880	Wasf3	WASP family, member 3
1451.49	-1.56034	0.0636133	9.78357e-134	3.2087e-132	ENSMUSG00000032320	26611	Rcn2	reticulocalbin 2
751.03	-4.92054	0.20124	1.06309e-133	3.47867e-132	ENSMUSG00000036949	277468	Slc39a12	solute carrier family 39 (zinc transporter), member 12
989.2	1.09754	0.0446977	1.55629e-133	5.08095e-132	ENSMUSG00000034931	217207	Dhx8	DEAH (Asp-Glu-Ala-His) box polypeptide 8
795.603	1.69718	0.06937	3.20097e-133	1.04267e-131	ENSMUSG00000009731	16506	Kcnd1	potassium voltage-gated channel, Shal-related family, member 1
899.093	-1.8741	0.0766824	4.09473e-133	1.33079e-131	ENSMUSG00000028385	209131	Snx30	sorting nexin family member 30
1334.51	1.21249	0.0494783	4.11876e-133	1.33558e-131	ENSMUSG00000036242	67419	Armh4	armadillo-like helical domain containing 4
530.413	1.65983	0.0679223	7.07459e-133	2.28888e-131	ENSMUSG00000030222	232441	Rerg	RAS-like, estrogen-regulated, growth-inhibitor
1641.88	-2.70027	0.110597	9.30241e-133	3.0029e-131	ENSMUSG00000001911	18032	Nfix	nuclear factor I/X
1947.15	-4.42117	0.181476	1.88528e-132	6.0722e-131	ENSMUSG00000046160	50914	Olig1	oligodendrocyte transcription factor 1
1436.82	1.83303	0.0751851	1.89968e-132	6.10489e-131	ENSMUSG00000021814	11750	Anxa7	annexin A7
668.063	1.34681	0.0551806	3.32708e-132	1.06682e-130	ENSMUSG00000031129	331004	Slc9a9	solute carrier family 9 (sodium/hydrogen exchanger), member 9
4058.62	-1.73245	0.0711098	3.60681e-132	1.15394e-130	ENSMUSG00000038486	64051	Sv2a	synaptic vesicle glycoprotein 2 a
601.325	2.49954	0.102674	4.01143e-132	1.28054e-130	ENSMUSG00000050473	76157	Slc35d3	solute carrier family 35, member D3
1151.93	1.26976	0.0520987	9.42792e-132	3.00293e-130	ENSMUSG00000006675	74443	P4htm	prolyl 4-hydroxylase, transmembrane (endoplasmic reticulum)
1564.34	1.57012	0.0645175	1.04863e-131	3.33266e-130	ENSMUSG00000031153	54645	Gripap1	GRIP1 associated protein 1
1451.36	-1.31307	0.0539117	1.26655e-131	4.01633e-130	ENSMUSG00000022472	28075	Desi1	desumoylating isopeptidase 1
2160.01	0.975777	0.0400496	2.04715e-131	6.47738e-130	ENSMUSG00000024392	224727	Bag6	BCL2-associated athanogene 6
2104.2	0.870594	0.0358006	7.41695e-131	2.34164e-129	ENSMUSG00000034152	211446	Exoc3	exocyst complex component 3
9478.25	1.00149	0.0412472	1.51992e-130	4.78808e-129	ENSMUSG00000021983	50769	Atp8a2	ATPase, aminophospholipid transporter-like, class I, type 8A, member 2
445.112	-3.6219	0.149605	1.83643e-130	5.77248e-129	ENSMUSG00000015341	57437	Golga7	golgi autoantigen, golgin subfamily a, 7
655.349	-2.11357	0.0874651	2.51851e-130	7.89922e-129	ENSMUSG00000021379	15904	Id4	inhibitor of DNA binding 4
5388.35	1.59118	0.0657497	2.69329e-130	8.42901e-129	ENSMUSG00000028465	21894	Tln1	talin 1
615.423	2.27115	0.0940608	4.04588e-130	1.26346e-128	ENSMUSG00000020866	12291	Cacna1g	calcium channel, voltage-dependent, T type, alpha 1G subunit
1136.78	-2.11786	0.0877403	4.81665e-130	1.50089e-128	ENSMUSG00000021986	72125	Amer2	APC membrane recruitment 2
1272.4	1.39368	0.0577133	1.61157e-129	5.01087e-128	ENSMUSG00000032285	58233	Dnaja4	DnaJ heat shock protein family (Hsp40) member A4
2413.95	1.15633	0.0478674	2.27033e-129	7.0439e-128	ENSMUSG00000028430	230082	Nol6	nucleolar protein family 6 (RNA-associated)
399.003	-3.21392	0.133359	3.00936e-129	9.31669e-128	ENSMUSG00000031665	58198	Sall1	spalt like transcription factor 1
3355.32	1.61897	0.0671916	3.22804e-129	9.97222e-128	ENSMUSG00000009090	11764	Ap1b1	adaptor protein complex AP-1, beta 1 subunit
13345.1	1.08585	0.0450594	1.07398e-128	3.31067e-127	ENSMUSG00000006273	11966	Atp6v1b2	ATPase, H+ transporting, lysosomal V1 subunit B2
1229.2	-3.78233	0.157498	1.76644e-128	5.4336e-127	ENSMUSG00000053279	11668	Aldh1a1	aldehyde dehydrogenase family 1, subfamily A1
350.238	-2.3966	0.0999255	2.19964e-128	6.75166e-127	ENSMUSG00000052310	30791	Slc39a1	solute carrier family 39 (zinc transporter), member 1
1765.98	-3.88758	0.162056	2.98e-128	9.12743e-127	ENSMUSG00000028927	18600	Padi2	peptidyl arginine deiminase, type II
719.413	1.46675	0.0610659	3.00186e-128	9.17483e-127	ENSMUSG00000040007	228536	Bahd1	bromo adjacent homology domain containing 1
647.014	1.79503	0.0748799	4.02275e-128	1.2269e-126	ENSMUSG00000045875	11549	Adra1a	adrenergic receptor, alpha 1a
1845.18	1.0254	0.0426451	4.32415e-128	1.31603e-126	ENSMUSG00000079562	59003	Maea	macrophage erythroblast attacher
1373.47	0.944805	0.0392964	5.17276e-128	1.57097e-126	ENSMUSG00000027879	20333	Sec22b	SEC22 homolog B, vesicle trafficking protein
2902.21	2.30194	0.0961482	5.59555e-128	1.69578e-126	ENSMUSG00000039474	22393	Wfs1	wolframin ER transmembrane glycoprotein
12474.2	-1.57811	0.065843	7.67492e-128	2.32106e-126	ENSMUSG00000006651	11803	Aplp1	amyloid beta (A4) precursor-like protein 1
781.108	1.24159	0.0517639	1.17385e-127	3.54251e-126	ENSMUSG00000009647	215999	Mcu	mitochondrial calcium uniporter
3244.17	-2.07262	0.0867304	1.61013e-127	4.84894e-126	ENSMUSG00000017390	11676	Aldoc	aldolase C, fructose-bisphosphate
3496.98	1.34777	0.0563709	5.73815e-127	1.72444e-125	ENSMUSG00000031865	13191	Dctn1	dynactin 1
288.468	2.46664	0.103547	1.16167e-126	3.4838e-125	ENSMUSG00000001333	68828	Sync	syncoilin
476.315	2.56441	0.107832	3.41386e-126	1.02167e-124	ENSMUSG00000033377	114301	Palmd	palmdelphin
1077.17	-5.30211	0.223791	4.83218e-126	1.44313e-124	ENSMUSG00000006522	16426	Itih3	inter-alpha trypsin inhibitor, heavy chain 3
15175.8	0.869767	0.0364756	6.64529e-126	1.98049e-124	ENSMUSG00000039485	72480	Tspyl4	TSPY-like 4
6695.65	1.40032	0.0589208	1.52157e-125	4.52534e-124	ENSMUSG00000026202	22145	Tuba4a	tubulin, alpha 4A
16478.4	1.27537	0.0537171	3.64384e-125	1.08148e-123	ENSMUSG00000004267	13807	Eno2	enolase 2, gamma neuronal
2891.05	0.990164	0.041663	3.66066e-125	1.08423e-123	ENSMUSG00000024241	20662	Sos1	SOS Ras/Rac guanine nucleotide exchange factor 1
1389.83	1.77655	0.0750142	4.18275e-125	1.23632e-123	ENSMUSG00000056900	72607	Usp13	ubiquitin specific peptidase 13 (isopeptidase T-3)
215.496	-5.02499	0.212728	4.23051e-125	1.24787e-123	ENSMUSG00000053475	21930	Tnfaip6	tumor necrosis factor alpha induced protein 6
1362.99	-3.78744	0.159897	4.48306e-125	1.31966e-123	ENSMUSG00000055538	71918	Zcchc24	zinc finger, CCHC domain containing 24
1203.21	1.44065	0.0607665	5.46959e-125	1.60676e-123	ENSMUSG00000037949	102566	Ano10	anoctamin 10
806.266	-1.83891	0.0777244	6.40165e-125	1.87673e-123	ENSMUSG00000059974	235106	Ntm	neurotrimin
1223.14	-1.77096	0.0748521	7.38628e-125	2.16098e-123	ENSMUSG00000057134	211488	Ado	2-aminoethanethiol (cysteamine) dioxygenase
3060.84	0.965673	0.0406896	8.4206e-125	2.45858e-123	ENSMUSG00000063801	11778	Ap3s2	adaptor-related protein complex 3, sigma 2 subunit
1309.94	-0.938525	0.0395459	8.81709e-125	2.56912e-123	ENSMUSG00000030201	16974	Lrp6	low density lipoprotein receptor-related protein 6
2008.04	1.24179	0.0524113	1.26931e-124	3.69102e-123	ENSMUSG00000030411	384569	Nova2	NOVA alternative splicing regulator 2
2932.13	1.64127	0.0694011	1.30016e-124	3.7731e-123	ENSMUSG00000016382	102866	Pls3	plastin 3 (T-isoform)
2298.23	1.3439	0.0568737	4.49343e-124	1.30137e-122	ENSMUSG00000028854	20544	Slc9a1	solute carrier family 9 (sodium/hydrogen exchanger), member 1
663.081	1.6916	0.0718982	2.01016e-123	5.81006e-122	ENSMUSG00000021260	214305	Hhipl1	hedgehog interacting protein-like 1
468.686	-1.97141	0.0839047	2.4491e-123	7.06453e-122	ENSMUSG00000026436	13714	Elk4	ELK4, member of ETS oncogene family
2429.16	1.08968	0.0462268	3.02892e-123	8.71953e-122	ENSMUSG00000021748	68263	Pdhb	pyruvate dehydrogenase (lipoamide) beta
584.695	-3.54844	0.151047	5.36405e-123	1.54109e-121	ENSMUSG00000027253	228357	Lrp4	low density lipoprotein receptor-related protein 4
462.591	1.94268	0.0828403	7.31977e-123	2.09877e-121	ENSMUSG00000055435	17132	Maf	avian musculoaponeurotic fibrosarcoma oncogene homolog
2087.46	1.23763	0.0526259	8.14433e-123	2.33054e-121	ENSMUSG00000066621	70381	Tecpr1	tectonin beta-propeller repeat containing 1
702.13	-3.10824	0.132525	1.39029e-122	3.97047e-121	ENSMUSG00000058325	330662	Dock1	dedicator of cytokinesis 1
591.149	-1.57401	0.0671549	2.22787e-122	6.34987e-121	ENSMUSG00000027162	22343	Lin7c	lin-7 homolog C, crumbs cell polarity complex component
275.218	-3.06739	0.130917	2.39679e-122	6.8178e-121	ENSMUSG00000028015	229445	Ctso	cathepsin O
2945.76	2.07618	0.0887715	2.78844e-122	7.91619e-121	ENSMUSG00000003528	13358	Slc25a1	solute carrier family 25 (mitochondrial carrier, citrate transporter), member 1
587.846	-2.07426	0.088695	2.89206e-122	8.19418e-121	ENSMUSG00000021589	73296	Rhobtb3	Rho-related BTB domain containing 3
884.908	1.08722	0.0463133	2.9907e-122	8.45697e-121	ENSMUSG00000028300	73205	C9orf72	C9orf72, member of C9orf72-SMCR8 complex
3993.28	1.08723	0.0463488	4.53981e-122	1.28122e-120	ENSMUSG00000019943	67972	Atp2b1	ATPase, Ca++ transporting, plasma membrane 1
4082.69	1.01379	0.0432552	8.33194e-122	2.34683e-120	ENSMUSG00000029777	353172	Gars	glycyl-tRNA synthetase
1358.13	-5.27796	0.226726	8.45131e-122	2.3758e-120	ENSMUSG00000017009	20971	Sdc4	syndecan 4
3958.19	1.31945	0.0564105	1.33988e-121	3.75924e-120	ENSMUSG00000031227	107528	Magee1	MAGE family member E1
510.699	2.04376	0.0876485	1.47739e-121	4.13697e-120	ENSMUSG00000027335	11550	Adra1d	adrenergic receptor, alpha 1d
1785.17	1.48212	0.0634636	2.0708e-121	5.78736e-120	ENSMUSG00000042826	14166	Fgf11	fibroblast growth factor 11
888.453	-1.49631	0.0641525	3.97664e-121	1.10921e-119	ENSMUSG00000037656	20516	Slc20a2	solute carrier family 20, member 2
1384.01	-2.02516	0.0870184	4.27963e-121	1.19141e-119	ENSMUSG00000025867	12890	Cplx2	complexin 2
331.438	-4.63444	0.19973	1.38118e-120	3.83766e-119	ENSMUSG00000038526	23831	Car14	carbonic anhydrase 14
963.85	1.10171	0.0472826	1.75272e-120	4.8606e-119	ENSMUSG00000019373	26572	Cops3	COP9 signalosome subunit 3
1891.77	0.780343	0.0334691	2.03022e-120	5.61928e-119	ENSMUSG00000019189	74315	Rnf145	ring finger protein 145
978.886	-1.79638	0.0774028	2.78136e-120	7.68352e-119	ENSMUSG00000068267	12616	Cenpb	centromere protein B
387.953	-2.02123	0.0871901	3.56763e-120	9.83665e-119	ENSMUSG00000032667	330260	Pon2	paraoxonase 2
447.551	1.80883	0.078092	7.77744e-120	2.14029e-118	ENSMUSG00000038354	213121	Ankrd35	ankyrin repeat domain 35
2606.22	0.982172	0.0422541	8.00665e-120	2.19915e-118	ENSMUSG00000021037	217737	Ahsa1	AHA1, activator of heat shock protein ATPase 1
213.116	-2.95092	0.12732	8.08729e-120	2.21706e-118	ENSMUSG00000025537	18682	Phkg1	phosphorylase kinase gamma 1
1534.61	1.42138	0.0612614	8.39889e-120	2.2981e-118	ENSMUSG00000030557	17258	Mef2a	myocyte enhancer factor 2A
2821.64	1.61597	0.0697528	1.1251e-119	3.07263e-118	ENSMUSG00000041729	235431	Coro2b	coronin, actin binding protein, 2B
631.505	-1.91853	0.0830048	1.98719e-119	5.41669e-118	ENSMUSG00000030657	233781	Xylt1	xylosyltransferase 1
3447.65	0.973995	0.0419806	2.22434e-119	6.05163e-118	ENSMUSG00000056050	338366	Mia3	MIA SH3 domain ER export factor 3
344.719	-4.23479	0.183278	2.24848e-119	6.10574e-118	ENSMUSG00000004902	71803	Slc25a18	solute carrier family 25 (mitochondrial carrier), member 18
3376.68	-2.41197	0.104439	2.85424e-119	7.73606e-118	ENSMUSG00000035093	70354	Secisbp2l	SECIS binding protein 2-like
2093.16	1.05225	0.0454068	3.67251e-119	9.93513e-118	ENSMUSG00000035173	213993	Ccdc186	coiled-coil domain containing 186
861.739	2.05594	0.0890992	4.1387e-119	1.11753e-117	ENSMUSG00000031093	75974	Dock11	dedicator of cytokinesis 11
1640.85	2.35336	0.102079	6.8487e-119	1.84581e-117	ENSMUSG00000050822	243328	Slc29a4	solute carrier family 29 (nucleoside transporters), member 4
1238.29	-4.58881	0.199199	7.06375e-119	1.9002e-117	ENSMUSG00000043496	66873	Tril	TLR4 interactor with leucine-rich repeats
511.929	-2.32796	0.101001	7.6181e-119	2.0455e-117	ENSMUSG00000026510	209456	Trp53bp2	transformation related protein 53 binding protein 2
1140.96	1.48017	0.0640995	9.25968e-119	2.48163e-117	ENSMUSG00000035735	269060	Dagla	diacylglycerol lipase, alpha
1741.86	1.77326	0.076984	1.65391e-118	4.42428e-117	ENSMUSG00000031078	13043	Cttn	cortactin
844.53	-2.39176	0.103948	2.01113e-118	5.36986e-117	ENSMUSG00000042444	235461	Mindy2	MINDY lysine 48 deubiquitinase 2
2837.38	2.3827	0.103629	2.91393e-118	7.75608e-117	ENSMUSG00000027350	12653	Chgb	chromogranin B
894.349	1.72053	0.0747572	2.91562e-118	7.75608e-117	ENSMUSG00000037341	236727	Slc9a7	solute carrier family 9 (sodium/hydrogen exchanger), member 7
8294.1	1.19159	0.0516587	3.34064e-118	8.87029e-117	ENSMUSG00000005469	18747	Prkaca	protein kinase, cAMP dependent, catalytic, alpha
1056.41	-0.93002	0.0402927	3.7987e-118	1.0068e-116	ENSMUSG00000027303	19262	Ptpra	protein tyrosine phosphatase, receptor type, A
2514.92	0.990734	0.0429448	4.52313e-118	1.19659e-116	ENSMUSG00000038916	67412	Soga3	SOGA family member 3
3838.08	1.34441	0.0584524	1.08829e-117	2.87377e-116	ENSMUSG00000006024	108124	Napa	N-ethylmaleimide sensitive fusion protein attachment protein alpha
601.439	-1.8751	0.0818067	1.81086e-117	4.77303e-116	ENSMUSG00000038910	224860	Plcl2	phospholipase C-like 2
1001.37	-1.49172	0.0650099	2.58398e-117	6.79832e-116	ENSMUSG00000046329	66972	Slc25a23	solute carrier family 25 (mitochondrial carrier; phosphate carrier), member 23
567.346	1.64988	0.0719652	2.68909e-117	7.06194e-116	ENSMUSG00000022707	74185	Gbe1	glucan (1,4-alpha-), branching enzyme 1
648.051	1.74783	0.0762731	2.69783e-117	7.07196e-116	ENSMUSG00000117679	225372	Apbb3	amyloid beta (A4) precursor protein-binding, family B, member 3
704.813	2.0857	0.0911298	3.05207e-117	7.98597e-116	ENSMUSG00000071234	627191	Syndig1l	synapse differentiation inducing 1 like
388.623	-2.42029	0.105729	3.10702e-117	8.11497e-116	ENSMUSG00000032733	235406	Snx33	sorting nexin 33
1456.38	-1.15075	0.050097	3.34421e-117	8.71862e-116	ENSMUSG00000020611	14674	Gna13	guanine nucleotide binding protein, alpha 13
3498.63	0.750397	0.0326812	7.7436e-117	2.01516e-115	ENSMUSG00000041236	218035	Vps41	VPS41 HOPS complex subunit
289.913	-4.63088	0.202905	8.97943e-117	2.33254e-115	ENSMUSG00000047945	17357	Marcksl1	MARCKS-like 1
7544.39	1.02591	0.0447471	1.15338e-116	2.99066e-115	ENSMUSG00000023011	72393	Faim2	Fas apoptotic inhibitory molecule 2
1320.63	1.01776	0.0444017	1.31907e-116	3.41413e-115	ENSMUSG00000026155	98366	Smap1	small ArfGAP 1
1007.34	1.27678	0.055868	3.71923e-116	9.60912e-115	ENSMUSG00000029073	79554	Cptp	ceramide-1-phosphate transfer protein
4030.61	1.97746	0.0868764	5.9208e-116	1.52697e-114	ENSMUSG00000020612	19084	Prkar1a	protein kinase, cAMP dependent regulatory, type I, alpha
15625.2	1.71185	0.0752264	1.12697e-115	2.90125e-114	ENSMUSG00000029608	19894	Rph3a	rabphilin 3A
856.619	1.39876	0.061382	1.23665e-115	3.1779e-114	ENSMUSG00000027293	98878	Ehd4	EH-domain containing 4
607.208	-3.0427	0.133811	2.06542e-115	5.29818e-114	ENSMUSG00000024816	67457	Frmd8	FERM domain containing 8
307.343	-2.28839	0.100802	2.10847e-115	5.39896e-114	ENSMUSG00000028838	56219	Extl1	exostosin-like glycosyltransferase 1
2922.13	1.55791	0.0685086	2.40055e-115	6.13593e-114	ENSMUSG00000030519	11784	Apba2	amyloid beta (A4) precursor protein-binding, family A, member 2
276.702	-2.81158	0.123742	2.50117e-115	6.38175e-114	ENSMUSG00000034471	140721	Caskin2	CASK-interacting protein 2
344.744	1.95767	0.0863391	4.46224e-115	1.13653e-113	ENSMUSG00000032776	244049	Mctp2	multiple C2 domains, transmembrane 2
2149.57	1.55195	0.0683292	4.56806e-115	1.16142e-113	ENSMUSG00000021285	21981	Ppp1r13b	protein phosphatase 1, regulatory subunit 13B
1532.79	1.08514	0.0477063	6.43321e-115	1.63274e-113	ENSMUSG00000042743	218544	Sgtb	small glutamine-rich tetratricopeptide repeat (TPR)-containing, beta
1302.55	0.986333	0.0433657	7.97655e-115	2.02087e-113	ENSMUSG00000031753	102339	Cog4	component of oligomeric golgi complex 4
2335.9	0.974892	0.0429066	1.38172e-114	3.49443e-113	ENSMUSG00000029998	66881	Pcyox1	prenylcysteine oxidase 1
1700.18	0.844133	0.0371613	1.91145e-114	4.82567e-113	ENSMUSG00000028124	14630	Gclm	glutamate-cysteine ligase, modifier subunit
14308.7	2.20179	0.0974883	2.88964e-114	7.2824e-113	ENSMUSG00000032826	109676	Ank2	ankyrin 2, brain
1644	-1.11579	0.0492208	3.52719e-114	8.87356e-113	ENSMUSG00000022390	20286	Zc3h7b	zinc finger CCCH type containing 7B
4182.28	1.05528	0.0465572	4.20448e-114	1.0559e-112	ENSMUSG00000027030	53416	Stk39	serine/threonine kinase 39
1359.58	-0.984332	0.0434465	5.97218e-114	1.49721e-112	ENSMUSG00000020132	216344	Rab21	RAB21, member RAS oncogene family
3354.17	1.21225	0.05363	1.26545e-113	3.16693e-112	ENSMUSG00000026615	107508	Eprs	glutamyl-prolyl-tRNA synthetase
2535.41	0.749512	0.0331172	1.4212e-113	3.55053e-112	ENSMUSG00000004771	53869	Rab11a	RAB11A, member RAS oncogene family
917.531	-4.15671	0.184634	1.87643e-113	4.67967e-112	ENSMUSG00000044734	66222	Serpinb1a	serine (or cysteine) peptidase inhibitor, clade B, member 1a
191.464	-3.38336	0.150198	2.71182e-113	6.75136e-112	ENSMUSG00000044986	22117	Tst	thiosulfate sulfurtransferase, mitochondrial
1620.22	-1.0427	0.0461763	2.98462e-113	7.41765e-112	ENSMUSG00000047675	20116	Rps8	ribosomal protein S8
845.673	-1.7002	0.0755568	3.65906e-113	9.07813e-112	ENSMUSG00000036737	108737	Oxsr1	oxidative-stress responsive 1
15402.2	1.60878	0.071509	5.14002e-113	1.27304e-111	ENSMUSG00000061603	238161	Akap6	A kinase (PRKA) anchor protein 6
16275.6	1.73545	0.07721	5.92928e-113	1.46599e-111	ENSMUSG00000062785	16504	Kcnc3	potassium voltage gated channel, Shaw-related subfamily, member 3
1086.51	-3.04592	0.135485	7.00581e-113	1.72918e-111	ENSMUSG00000039621	277360	Prex1	phosphatidylinositol-3,4,5-trisphosphate-dependent Rac exchange factor 1
686.641	1.26101	0.0559937	7.45322e-113	1.83646e-111	ENSMUSG00000033948	74464	Zswim5	zinc finger SWIM-type containing 5
662.217	1.65724	0.0738319	1.44199e-112	3.54694e-111	ENSMUSG00000078235	625638	Fam43b	family with sequence similarity 43, member B
1061.82	1.10715	0.0492337	2.17058e-112	5.32998e-111	ENSMUSG00000029875	239650	Ccdc184	coiled-coil domain containing 184
420.939	-1.76022	0.0785703	2.9482e-112	7.22712e-111	ENSMUSG00000021959	50523	Lats2	large tumor suppressor 2
791.632	-4.84017	0.216637	3.50446e-112	8.57607e-111	ENSMUSG00000045092	13609	S1pr1	sphingosine-1-phosphate receptor 1
1052.37	-2.548	0.113871	4.30172e-112	1.05092e-110	ENSMUSG00000091712	665119	Sec14l5	SEC14-like lipid binding 5
537.492	-2.51914	0.112601	4.5386e-112	1.10691e-110	ENSMUSG00000037235	17122	Mxd4	Max dimerization protein 4
2200.44	1.61777	0.07223	4.77556e-112	1.16273e-110	ENSMUSG00000032598	80987	Nckipsd	NCK interacting protein with SH3 domain
476.945	2.81302	0.125656	4.82438e-112	1.17263e-110	ENSMUSG00000074575	241794	Kcng1	potassium voltage-gated channel, subfamily G, member 1
343.821	-2.37157	0.106147	7.49789e-112	1.81938e-110	ENSMUSG00000034462	18764	Pkd2	polycystin 2, transient receptor potential cation channel
319.566	-4.18856	0.187667	1.41515e-111	3.42809e-110	ENSMUSG00000028128	14066	F3	coagulation factor III
920.314	-1.18068	0.0528176	3.77907e-111	9.13911e-110	ENSMUSG00000025103	83962	Btbd1	BTB (POZ) domain containing 1
165.514	-3.42261	0.153605	6.40616e-111	1.54663e-109	ENSMUSG00000000202	72014	Btbd17	BTB (POZ) domain containing 17
31779.4	1.26493	0.0567038	8.79824e-111	2.12058e-109	ENSMUSG00000023944	15516	Hsp90ab1	heat shock protein 90 alpha (cytosolic), class B member 1
773.612	1.61628	0.0725872	8.9345e-111	2.14982e-109	ENSMUSG00000002997	19088	Prkar2b	protein kinase, cAMP dependent regulatory, type II beta
561.446	-1.39698	0.0627956	2.50194e-110	6.01009e-109	ENSMUSG00000018849	211652	Wwc1	WW, C2 and coiled-coil domain containing 1
3518.5	0.947579	0.0425692	4.74056e-110	1.13686e-108	ENSMUSG00000019146	12300	Cacng2	calcium channel, voltage-dependent, gamma subunit 2
1057.02	1.44982	0.0652876	5.3032e-110	1.26967e-108	ENSMUSG00000032120	71764	C2cd2l	C2 calcium-dependent domain containing 2-like
282.052	1.76982	0.0798317	5.3214e-110	1.27191e-108	ENSMUSG00000036306	211134	Lzts1	leucine zipper, putative tumor suppressor 1
308.407	1.64197	0.0740966	9.02075e-110	2.15254e-108	ENSMUSG00000058152	78923	Chsy3	chondroitin sulfate synthase 3
2574.28	1.06732	0.0480368	9.66502e-110	2.30245e-108	ENSMUSG00000024777	225849	Ppp2r5b	protein phosphatase 2, regulatory subunit B', beta
2265.25	1.2589	0.0567267	1.17029e-109	2.7833e-108	ENSMUSG00000037098	215445	Rab11fip3	RAB11 family interacting protein 3 (class II)
1077.97	-3.80106	0.171739	1.36854e-109	3.24943e-108	ENSMUSG00000020099	107449	Unc5b	unc-5 netrin receptor B
1230.5	0.913648	0.0411295	1.38402e-109	3.28077e-108	ENSMUSG00000024269	66648	Tpgs2	tubulin polyglutamylase complex subunit 2
8110.67	3.02366	0.136585	1.51351e-109	3.5818e-108	ENSMUSG00000023033	20273	Scn8a	sodium channel, voltage-gated, type VIII, alpha
1289.12	-1.17691	0.0531222	3.22156e-109	7.61147e-108	ENSMUSG00000001334	384061	Fndc5	fibronectin type III domain containing 5
1480.98	1.00459	0.0453172	3.33638e-109	7.86981e-108	ENSMUSG00000020577	66109	Tspan13	tetraspanin 13
2300.52	-1.48802	0.0673046	4.21231e-109	9.91963e-108	ENSMUSG00000028832	16765	Stmn1	stathmin 1
1285.72	1.37275	0.0620888	5.58568e-109	1.31323e-107	ENSMUSG00000027782	16649	Kpna4	karyopherin (importin) alpha 4
738.526	1.58273	0.0716691	5.6744e-109	1.33191e-107	ENSMUSG00000021257	68737	Angel1	angel homolog 1
258.485	-3.14792	0.142572	5.81575e-109	1.36286e-107	ENSMUSG00000097789	100039239	Gm2115	predicted gene 2115
1650.52	-3.15519	0.142923	6.27688e-109	1.46852e-107	ENSMUSG00000036098	225908	Myrf	myelin regulatory factor
1363.9	2.07213	0.0940805	8.16776e-109	1.9078e-107	ENSMUSG00000009394	20965	Syn2	synapsin II
365.334	-3.74947	0.170105	1.06825e-108	2.49113e-107	ENSMUSG00000020122	13649	Egfr	epidermal growth factor receptor
823.897	1.5995	0.0725789	1.49196e-108	3.47358e-107	ENSMUSG00000036913	330863	Trim67	tripartite motif-containing 67
239.741	-4.58504	0.208696	1.96118e-108	4.55862e-107	ENSMUSG00000046805	17476	Mpeg1	macrophage expressed gene 1
1076.26	1.4229	0.064548	2.0895e-108	4.84906e-107	ENSMUSG00000033214	75409	Slitrk5	SLIT and NTRK-like family, member 5
643.563	1.76742	0.0803499	2.45205e-108	5.68123e-107	ENSMUSG00000014776	78688	Nol3	nucleolar protein 3 (apoptosis repressor with CARD domain)
200.987	-4.10633	0.186872	3.29468e-108	7.62127e-107	ENSMUSG00000022912	19128	Pros1	protein S (alpha)
306.738	-2.72726	0.124071	3.53437e-108	8.16257e-107	ENSMUSG00000042246	209760	Tmc7	transmembrane channel-like gene family 7
308.135	-2.83834	0.129153	4.48475e-108	1.03408e-106	ENSMUSG00000001985	14807	Grik3	glutamate receptor, ionotropic, kainate 3
751.764	-3.5596	0.16203	6.19698e-108	1.4266e-106	ENSMUSG00000011884	56356	Gltp	glycolipid transfer protein
427.853	-3.3607	0.152967	6.55999e-108	1.50775e-106	ENSMUSG00000036885	622434	Arhgef26	Rho guanine nucleotide exchange factor (GEF) 26
796.051	-1.22346	0.0555774	6.63071e-108	1.52157e-106	ENSMUSG00000018415	66771	Gid4	GID complex subunit 4, VID24 homolog
457.187	-3.05972	0.139384	9.36222e-108	2.14495e-106	ENSMUSG00000031990	83964	Jam3	junction adhesion molecule 3
503.854	-3.30789	0.150721	1.09485e-107	2.50439e-106	ENSMUSG00000030522	233315	Mtmr10	myotubularin related protein 10
1328.01	1.33693	0.06084	1.20397e-107	2.7496e-106	ENSMUSG00000050908	383103	Tvp23a	trans-golgi network vesicle protein 23A
1409.46	1.01812	0.046271	1.24462e-107	2.83793e-106	ENSMUSG00000026158	70155	Ogfrl1	opioid growth factor receptor-like 1
3136.4	1.0728	0.0487701	1.29441e-107	2.94678e-106	ENSMUSG00000035776	171486	Cd99l2	CD99 antigen-like 2
468.535	-2.28529	0.104411	1.67219e-107	3.80078e-106	ENSMUSG00000049493	102502	Pls1	plastin 1 (I-isoform)
929.801	-1.12258	0.0510804	1.85092e-107	4.20039e-106	ENSMUSG00000032470	17532	Mras	muscle and microspikes RAS
3184.74	1.74475	0.0796928	2.4996e-107	5.66352e-106	ENSMUSG00000021196	56421	Pfkp	phosphofructokinase, platelet
2629.34	0.848163	0.0385841	2.56554e-107	5.80377e-106	ENSMUSG00000002808	105298	Epdr1	ependymin related protein 1 (zebrafish)
3741.79	-4.28581	0.195981	2.69406e-107	6.08493e-106	ENSMUSG00000039728	104245	Slc6a5	solute carrier family 6 (neurotransmitter transporter, glycine), member 5
1741.78	1.97544	0.0903498	3.07774e-107	6.94061e-106	ENSMUSG00000020042	74007	Btbd11	BTB (POZ) domain containing 11
4395.94	-1.14873	0.0523422	3.40944e-107	7.67658e-106	ENSMUSG00000063317	76179	Usp31	ubiquitin specific peptidase 31
1155.59	1.61082	0.0736321	5.06924e-107	1.13959e-105	ENSMUSG00000036948	231807	Trappc14	trafficking protein particle complex 14
3910.18	1.48985	0.0680573	5.08741e-107	1.14188e-105	ENSMUSG00000052934	76454	Fbxo31	F-box protein 31
1309.96	-1.58763	0.072602	6.56636e-107	1.47154e-105	ENSMUSG00000026028	70827	Trak2	trafficking protein, kinesin binding 2
12060.2	1.22082	0.055723	6.71689e-107	1.50293e-105	ENSMUSG00000036438	12314	Calm2	calmodulin 2
987.32	-1.8171	0.0832108	7.26741e-107	1.62358e-105	ENSMUSG00000025666	192216	Tmem47	transmembrane protein 47
7832.49	1.28974	0.0589052	7.72395e-107	1.7229e-105	ENSMUSG00000040265	103967	Dnm3	dynamin 3
856.289	-3.57153	0.163599	1.26263e-106	2.81205e-105	ENSMUSG00000055717	105439	Slain1	SLAIN motif family, member 1
407.438	-1.82891	0.0839093	1.74174e-106	3.87308e-105	ENSMUSG00000025078	66866	Nhlrc2	NHL repeat containing 2
5628.48	1.26086	0.0577319	2.77073e-106	6.15171e-105	ENSMUSG00000041020	78283	Map7d2	MAP7 domain containing 2
1515.39	1.44042	0.0660197	2.87252e-106	6.36785e-105	ENSMUSG00000032997	74241	Chpf	chondroitin polymerizing factor
708.262	1.95472	0.0898225	2.96183e-106	6.55573e-105	ENSMUSG00000040972	230868	Igsf21	immunoglobulin superfamily, member 21
394.893	2.14406	0.0987676	8.22134e-106	1.81692e-104	ENSMUSG00000000792	114479	Slc5a5	solute carrier family 5 (sodium iodide symporter), member 5
588.596	1.33919	0.0615095	1.01339e-105	2.23615e-104	ENSMUSG00000037239	101809	Spred3	sprouty-related EVH1 domain containing 3
440.114	-3.45646	0.15905	1.1676e-105	2.57248e-104	ENSMUSG00000009291	108705	Pttg1ip	pituitary tumor-transforming 1 interacting protein
739.833	1.5083	0.0693662	1.2043e-105	2.64927e-104	ENSMUSG00000021759	19012	Plpp1	phospholipid phosphatase 1
6367.01	0.863682	0.0396195	1.38632e-105	3.04503e-104	ENSMUSG00000003316	20340	Glg1	golgi apparatus protein 1
514.671	-3.01455	0.138812	1.55327e-105	3.40652e-104	ENSMUSG00000026923	18128	Notch1	notch 1
2072.58	-2.23764	0.103287	2.13841e-105	4.68265e-104	ENSMUSG00000000149	14673	Gna12	guanine nucleotide binding protein, alpha 12
233.356	-4.51019	0.208289	2.18838e-105	4.78478e-104	ENSMUSG00000050854	230678	Tmem125	transmembrane protein 125
1181.44	-4.19169	0.193484	2.60328e-105	5.68329e-104	ENSMUSG00000032648	19309	Pygm	muscle glycogen phosphorylase
827.869	-2.70335	0.124861	4.70858e-105	1.02638e-103	ENSMUSG00000030096	21366	Slc6a6	solute carrier family 6 (neurotransmitter transporter, taurine), member 6
1061.48	1.62241	0.074885	4.92373e-105	1.07166e-103	ENSMUSG00000027489	56846	Necab3	N-terminal EF-hand calcium binding protein 3
5178.39	1.0516	0.0484051	5.23412e-105	1.13749e-103	ENSMUSG00000029104	15194	Htt	huntingtin
2951.34	1.37924	0.0636239	7.09686e-105	1.53998e-103	ENSMUSG00000036644	76795	Tbc1d9b	TBC1 domain family, member 9B
8201.17	1.21207	0.0559184	1.10966e-104	2.40426e-103	ENSMUSG00000027002	50884	Nckap1	NCK-associated protein 1
538.743	1.48409	0.0685898	1.31035e-104	2.83482e-103	ENSMUSG00000045174	211383	Amer3	APC membrane recruitment 3
3602.83	1.20284	0.0555186	1.41044e-104	3.04677e-103	ENSMUSG00000041757	240753	Plekha6	pleckstrin homology domain containing, family A member 6
5406.58	1.23663	0.0571049	1.63357e-104	3.52346e-103	ENSMUSG00000032589	12217	Bsn	bassoon
917.573	1.01169	0.0466784	1.70987e-104	3.68251e-103	ENSMUSG00000000339	66368	Rtca	RNA 3'-terminal phosphate cyclase
5125.08	-1.65846	0.0767798	1.84401e-104	3.96546e-103	ENSMUSG00000013698	18611	Pea15a	proliferation and apoptosis adaptor protein 15A
2525.64	1.72675	0.0800531	2.98598e-104	6.4116e-103	ENSMUSG00000050556	16500	Kcnb1	potassium voltage gated channel, Shab-related subfamily, member 1
1307.56	-2.45314	0.113902	3.95832e-104	8.48676e-103	ENSMUSG00000020023	319880	Tmcc3	transmembrane and coiled coil domains 3
3168.32	-4.10489	0.190725	6.18968e-104	1.32511e-102	ENSMUSG00000030310	232333	Slc6a1	solute carrier family 6 (neurotransmitter transporter, GABA), member 1
2135.65	1.45763	0.0676172	7.96115e-104	1.70181e-102	ENSMUSG00000022010	21807	Tsc22d1	TSC22 domain family, member 1
419.547	-1.88748	0.0878345	1.21941e-103	2.60279e-102	ENSMUSG00000022253	68646	Nadk2	NAD kinase 2, mitochondrial
485.091	-3.0545	0.142018	1.4672e-103	3.12706e-102	ENSMUSG00000078234	242721	Klhdc7a	kelch domain containing 7A
32396.5	0.817665	0.0378812	1.55746e-103	3.31451e-102	ENSMUSG00000074657	16572	Kif5a	kinesin family member 5A
4537.41	1.44803	0.0672674	1.57907e-103	3.35552e-102	ENSMUSG00000041556	230904	Fbxo2	F-box protein 2
184.346	-3.03155	0.141032	1.88947e-103	4.00919e-102	ENSMUSG00000021371	76137	Mcur1	mitochondrial calcium uniporter regulator 1
895.468	1.60769	0.0747972	2.08594e-103	4.41956e-102	ENSMUSG00000026705	226541	Klhl20	kelch-like 20
244.731	-5.13236	0.2399	2.31736e-103	4.90263e-102	ENSMUSG00000032766	66066	Gng11	guanine nucleotide binding protein (G protein), gamma 11
379.648	-2.81956	0.131326	2.70906e-103	5.7229e-102	ENSMUSG00000024165	52009	Jpt2	Jupiter microtubule associated homolog 2
816.221	1.42875	0.0664499	2.86946e-103	6.05283e-102	ENSMUSG00000022442	319953	Ttll1	tubulin tyrosine ligase-like 1
1637.29	1.35676	0.0631248	4.09024e-103	8.6153e-102	ENSMUSG00000042216	52850	Sgsm1	small G protein signaling modulator 1
260.059	2.07452	0.0968407	4.11111e-103	8.64656e-102	ENSMUSG00000030137	53857	Tuba8	tubulin, alpha 8
4678.27	-1.25164	0.0582278	5.00985e-103	1.05214e-101	ENSMUSG00000074505	270120	Fat3	FAT atypical cadherin 3
310.168	-2.3627	0.110388	6.40394e-103	1.34296e-101	ENSMUSG00000054091	67704	1810037I17Rik	RIKEN cDNA 1810037I17 gene
6706.24	0.983437	0.0457462	8.07355e-103	1.69062e-101	ENSMUSG00000034636	414872	Zyg11b	zyg-ll family member B, cell cycle regulator
322.341	-1.96222	0.0917617	1.04096e-102	2.17662e-101	ENSMUSG00000044167	56458	Foxo1	forkhead box O1
332.757	2.40506	0.112512	1.20247e-102	2.51068e-101	ENSMUSG00000021972	219150	Hmbox1	homeobox containing 1
1974.34	1.01099	0.0471267	2.03407e-102	4.24084e-101	ENSMUSG00000031327	12212	Chic1	cysteine-rich hydrophobic domain 1
708.822	0.97021	0.0452201	2.05388e-102	4.27593e-101	ENSMUSG00000041025	212632	Iffo2	intermediate filament family orphan 2
8306.64	1.35952	0.0635087	2.60193e-102	5.40908e-101	ENSMUSG00000007564	51792	Ppp2r1a	protein phosphatase 2, regulatory subunit A, alpha
3722.87	-4.14218	0.194047	2.60954e-102	5.41707e-101	ENSMUSG00000006782	12799	Cnp	2',3'-cyclic nucleotide 3' phosphodiesterase
1159.87	-1.40531	0.0657043	3.44173e-102	7.13427e-101	ENSMUSG00000034210	230648	Efcab14	EF-hand calcium binding domain 14
1071.04	-2.1599	0.101413	5.64688e-102	1.16884e-100	ENSMUSG00000062078	19317	Qk	quaking, KH domain containing RNA binding
269.5	-4.25923	0.200354	1.47312e-101	3.04481e-100	ENSMUSG00000076435	264895	Acsf2	acyl-CoA synthetase family member 2
838.689	1.17184	0.054923	1.82615e-101	3.76906e-100	ENSMUSG00000040563	235044	Plppr2	phospholipid phosphatase related 2
1903.14	0.984409	0.0461041	1.84392e-101	3.80027e-100	ENSMUSG00000038845	18673	Phb	prohibitin
1190.56	1.06939	0.0501825	3.88778e-101	8.00115e-100	ENSMUSG00000025917	26754	Cops5	COP9 signalosome subunit 5
535.157	2.20826	0.104133	4.00914e-101	8.2391e-100	ENSMUSG00000036067	227659	Slc2a6	solute carrier family 2 (facilitated glucose transporter), member 6
2831.76	1.0757	0.0505486	7.22067e-101	1.48179e-99	ENSMUSG00000042359	99031	Osbpl6	oxysterol binding protein-like 6
969.558	1.24699	0.0587215	1.32089e-100	2.70679e-99	ENSMUSG00000059890	140630	Ube4a	ubiquitination factor E4A
913.209	-2.16182	0.102223	1.37177e-100	2.80706e-99	ENSMUSG00000027007	70599	Itprid2	ITPR interacting domain containing 2
924.812	1.44502	0.0681281	1.38814e-100	2.8365e-99	ENSMUSG00000019966	17311	Kitl	kit ligand
1222.99	1.55819	0.0735653	1.91802e-100	3.91368e-99	ENSMUSG00000032172	244723	Olfm2	olfactomedin 2
1032.35	1.41483	0.0667768	2.44488e-100	4.98166e-99	ENSMUSG00000038604	75687	Ripor1	RHO family interacting cell polarization regulator 1
1002.29	-1.54671	0.0732124	6.29409e-100	1.28066e-98	ENSMUSG00000027828	67437	Ssr3	signal sequence receptor, gamma
410.999	-2.36388	0.112149	6.55547e-100	1.33196e-98	ENSMUSG00000039298	214444	Cdk5rap2	CDK5 regulatory subunit associated protein 2
826.157	-2.07058	0.098282	7.78504e-100	1.57955e-98	ENSMUSG00000070639	433926	Lrrc8b	leucine rich repeat containing 8 family, member B
1160.5	-2.85863	0.135526	8.76578e-100	1.77603e-98	ENSMUSG00000023019	14555	Gpd1	glycerol-3-phosphate dehydrogenase 1 (soluble)
284.066	-3.61435	0.171441	1.20808e-99	2.44424e-98	ENSMUSG00000040606	71529	Kazn	kazrin, periplakin interacting protein
1710.32	0.755242	0.0357059	1.79509e-99	3.62678e-98	ENSMUSG00000021114	73834	Atp6v1d	ATPase, H+ transporting, lysosomal V1 subunit D
763.062	-4.29265	0.20413	1.82956e-99	3.69124e-98	ENSMUSG00000024164	12266	C3	complement component 3
799.359	1.57214	0.0746564	2.47653e-99	4.98953e-98	ENSMUSG00000046613	328643	Vwa5b2	von Willebrand factor A domain containing 5B2
4714.71	0.825213	0.0390561	2.67574e-99	5.38333e-98	ENSMUSG00000030774	18479	Pak1	p21 (RAC1) activated kinase 1
800.092	-2.98162	0.141721	3.08511e-99	6.19826e-98	ENSMUSG00000073418	12268	C4b	complement component 4B (Chido blood group)
8670.32	0.984618	0.0466398	3.09485e-99	6.20915e-98	ENSMUSG00000005873	13476	Reep5	receptor accessory protein 5
1245.1	-5.03495	0.240417	3.91776e-99	7.84918e-98	ENSMUSG00000031980	11606	Agt	angiotensinogen (serpin peptidase inhibitor, clade A, member 8)
1691.42	-4.49456	0.214815	1.31204e-98	2.62499e-97	ENSMUSG00000026249	20720	Serpine2	serine (or cysteine) peptidase inhibitor, clade E, member 2
6751.83	0.952414	0.0453017	2.05885e-98	4.1134e-97	ENSMUSG00000056201	12631	Cfl1	cofilin 1, non-muscle
5456.99	1.07018	0.0509404	2.3302e-98	4.64908e-97	ENSMUSG00000031672	14719	Got2	glutamatic-oxaloacetic transaminase 2, mitochondrial
823.272	-1.78619	0.0853786	2.62566e-98	5.2313e-97	ENSMUSG00000037815	12385	Ctnna1	catenin (cadherin associated protein), alpha 1
437.82	1.99533	0.0955496	4.08276e-98	8.1231e-97	ENSMUSG00000050164	207911	Mchr1	melanin-concentrating hormone receptor 1
5063.98	0.948692	0.0451996	4.31221e-98	8.56775e-97	ENSMUSG00000024359	15526	Hspa9	heat shock protein 9
2275.66	1.19035	0.0567902	5.02973e-98	9.97957e-97	ENSMUSG00000001986	53623	Gria3	glutamate receptor, ionotropic, AMPA3 (alpha 3)
1455.85	1.14203	0.0544999	6.27184e-98	1.24269e-96	ENSMUSG00000039431	54384	Mtmr7	myotubularin related protein 7
1505.74	1.39445	0.0666618	7.53497e-98	1.49091e-96	ENSMUSG00000035049	107094	Rrp12	ribosomal RNA processing 12 homolog
3913.68	2.00306	0.0961102	9.60581e-98	1.89804e-96	ENSMUSG00000021091	20716	Serpina3n	serine (or cysteine) peptidase inhibitor, clade A, member 3N
710.151	1.37388	0.0657666	1.42776e-97	2.81728e-96	ENSMUSG00000022557	12181	Bop1	block of proliferation 1
1439.85	0.915858	0.0437867	2.08229e-97	4.10318e-96	ENSMUSG00000040327	78309	Cul9	cullin 9
3073.49	0.988624	0.0472979	2.50822e-97	4.9357e-96	ENSMUSG00000026181	68606	Ppm1f	protein phosphatase 1F (PP2C domain containing)
277.906	-3.82472	0.183921	4.14411e-97	8.14365e-96	ENSMUSG00000091735	436090	Gpr62	G protein-coupled receptor 62
584.11	1.70093	0.0818256	5.22815e-97	1.02599e-95	ENSMUSG00000031169	53627	Porcn	porcupine O-acyltransferase
815.572	1.78584	0.0859683	5.73549e-97	1.12402e-95	ENSMUSG00000018507	22368	Trpv2	transient receptor potential cation channel, subfamily V, member 2
255.887	-2.3553	0.113513	6.41145e-97	1.25477e-95	ENSMUSG00000020021	13998	Fgd6	FYVE, RhoGEF and PH domain containing 6
1077.41	1.27957	0.061462	7.98991e-97	1.56156e-95	ENSMUSG00000040918	116914	Slc19a2	solute carrier family 19 (thiamine transporter), member 2
537.5	1.37297	0.0660255	1.05642e-96	2.06189e-95	ENSMUSG00000039546	230959	Ajap1	adherens junction associated protein 1
8755.43	1.6098	0.0776338	1.92683e-96	3.75562e-95	ENSMUSG00000022564	66168	Grina	glutamate receptor, ionotropic, N-methyl D-aspartate-associated protein 1 (glutamate binding)
202.741	-2.55926	0.123659	2.43535e-96	4.74035e-95	ENSMUSG00000020334	30805	Slc22a4	solute carrier family 22 (organic cation transporter), member 4
3033.82	0.716863	0.0344702	3.26902e-96	6.35446e-95	ENSMUSG00000022403	70356	St13	suppression of tumorigenicity 13
654.115	-4.02905	0.194776	3.28904e-96	6.38473e-95	ENSMUSG00000025780	209378	Itih5	inter-alpha (globulin) inhibitor H5
828.7	1.31258	0.0633912	7.72884e-96	1.49831e-94	ENSMUSG00000039058	229949	Ak5	adenylate kinase 5
318.764	-2.03335	0.0985874	8.37384e-96	1.62116e-94	ENSMUSG00000102742	93723	Pcdhga11	protocadherin gamma subfamily A, 11
1303.4	-2.15719	0.104658	1.02704e-95	1.98566e-94	ENSMUSG00000028645	20525	Slc2a1	solute carrier family 2 (facilitated glucose transporter), member 1
738.451	-2.33382	0.113268	1.26993e-95	2.45196e-94	ENSMUSG00000035441	338367	Myo1d	myosin ID
302.461	-1.74707	0.0847411	1.61425e-95	3.11258e-94	ENSMUSG00000030876	59052	Mettl9	methyltransferase like 9
548.188	-2.78517	0.135093	1.69063e-95	3.25548e-94	ENSMUSG00000022416	239556	Cacna1i	calcium channel, voltage-dependent, alpha 1I subunit
962.686	-2.40797	0.116948	1.82229e-95	3.50431e-94	ENSMUSG00000025582	18164	Nptx1	neuronal pentraxin 1
443.241	-2.63428	0.128066	3.66764e-95	7.04354e-94	ENSMUSG00000015653	74051	Steap2	six transmembrane epithelial antigen of prostate 2
2058.58	-1.23838	0.0600212	4.22781e-95	8.10848e-94	ENSMUSG00000031320	20102	Rps4x	ribosomal protein S4, X-linked
3792.02	0.973414	0.0471272	4.4066e-95	8.44011e-94	ENSMUSG00000004535	52440	Tax1bp1	Tax1 (human T cell leukemia virus type I) binding protein 1
6303.87	0.66921	0.0323745	4.67922e-95	8.95034e-94	ENSMUSG00000030704	19346	Rab6a	RAB6A, member RAS oncogene family
2114.67	0.945692	0.0457887	4.76415e-95	9.10066e-94	ENSMUSG00000032458	50797	Copb2	coatomer protein complex, subunit beta 2 (beta prime)
31005.8	1.47406	0.0715907	5.64702e-95	1.07728e-93	ENSMUSG00000072235	22142	Tuba1a	tubulin, alpha 1A
2718.18	1.37154	0.0666029	6.97563e-95	1.32898e-93	ENSMUSG00000031778	20312	Cx3cl1	chemokine (C-X3-C motif) ligand 1
321.017	-2.14382	0.104483	7.05391e-95	1.34211e-93	ENSMUSG00000037434	22782	Slc30a1	solute carrier family 30 (zinc transporter), member 1
2270.83	1.35145	0.0656333	7.61927e-95	1.44776e-93	ENSMUSG00000041216	74438	Clvs1	clavesin 1
735.439	-1.64389	0.0801243	1.63254e-94	3.09795e-93	ENSMUSG00000067279	53412	Ppp1r3c	protein phosphatase 1, regulatory subunit 3C
2336.63	0.876171	0.0425471	1.83914e-94	3.48538e-93	ENSMUSG00000078566	12176	Bnip3	BCL2/adenovirus E1B interacting protein 3
843.619	-1.31644	0.0640562	1.87561e-94	3.54982e-93	ENSMUSG00000031987	112405	Egln1	egl-9 family hypoxia-inducible factor 1
299.582	-4.26471	0.208306	1.98244e-94	3.74708e-93	ENSMUSG00000064325	15245	Hhip	Hedgehog-interacting protein
1181.81	-1.46168	0.0711967	2.00923e-94	3.79272e-93	ENSMUSG00000024782	56248	Ak3	adenylate kinase 3
753.097	1.03313	0.0502252	2.31337e-94	4.3611e-93	ENSMUSG00000033068	12497	Entpd6	ectonucleoside triphosphate diphosphohydrolase 6
885.377	-1.20139	0.058548	4.6892e-94	8.82836e-93	ENSMUSG00000021796	12166	Bmpr1a	bone morphogenetic protein receptor, type 1A
1918.8	0.982427	0.0478385	5.03802e-94	9.47266e-93	ENSMUSG00000024527	69597	Afg3l2	AFG3-like AAA ATPase 2
2214.6	0.761913	0.037081	5.45168e-94	1.0237e-92	ENSMUSG00000047388	234776	Atmin	ATM interactor
3484.35	0.842301	0.0410376	7.79464e-94	1.46175e-92	ENSMUSG00000036698	239528	Ago2	argonaute RISC catalytic subunit 2
742.139	1.39957	0.0683834	8.71893e-94	1.63295e-92	ENSMUSG00000037110	241694	Ralgapa2	Ral GTPase activating protein, alpha subunit 2 (catalytic)
666.668	-1.4593	0.0713366	9.16404e-94	1.71408e-92	ENSMUSG00000052298	72729	Cdc42se2	CDC42 small effector 2
33026.1	-0.8518	0.0415893	1.89552e-93	3.54084e-92	ENSMUSG00000029309	13602	Sparcl1	SPARC-like 1
1135.48	1.26855	0.0620696	2.17655e-93	4.06053e-92	ENSMUSG00000035754	216156	Wdr18	WD repeat domain 18
753.531	1.08945	0.0532631	2.25758e-93	4.20624e-92	ENSMUSG00000018848	104458	Rars	arginyl-tRNA synthetase
1734.16	1.49753	0.0735385	5.51732e-93	1.02664e-91	ENSMUSG00000041133	24061	Smc1a	structural maintenance of chromosomes 1A
1639.81	0.937578	0.045916	5.95855e-93	1.1073e-91	ENSMUSG00000018736	83431	Ndel1	nudE neurodevelopment protein 1 like 1
4005.21	1.1035	0.0540913	6.57357e-93	1.22002e-91	ENSMUSG00000025980	15510	Hspd1	heat shock protein 1 (chaperonin)
2730.58	-1.08131	0.0530754	1.20358e-92	2.23089e-91	ENSMUSG00000028495	20104	Rps6	ribosomal protein S6
3501.37	1.11188	0.0546007	1.37338e-92	2.54235e-91	ENSMUSG00000018401	170749	Mtmr4	myotubularin related protein 4
3310.27	0.730237	0.0358175	1.49126e-92	2.75701e-91	ENSMUSG00000030835	211548	Nomo1	nodal modulator 1
574.024	-3.12957	0.154182	1.54053e-92	2.84444e-91	ENSMUSG00000037679	70435	Inf2	inverted formin, FH2 and WH2 domain containing
6702.36	1.04311	0.0512267	1.60063e-92	2.95161e-91	ENSMUSG00000001924	22201	Uba1	ubiquitin-like modifier activating enzyme 1
892.863	1.13404	0.0557476	2.03207e-92	3.7424e-91	ENSMUSG00000038764	545622	Ptpn3	protein tyrosine phosphatase, non-receptor type 3
567.742	-2.03319	0.100454	2.22168e-92	4.08636e-91	ENSMUSG00000030002	72102	Dusp11	dual specificity phosphatase 11 (RNA/RNP complex 1-interacting)
14869.3	0.899796	0.0442136	2.54358e-92	4.67245e-91	ENSMUSG00000020745	18472	Pafah1b1	platelet-activating factor acetylhydrolase, isoform 1b, subunit 1
4908.07	1.4765	0.0728222	3.5354e-92	6.48608e-91	ENSMUSG00000037979	215707	Ccdc92	coiled-coil domain containing 92
2858.19	-1.53749	0.0760556	1.01676e-91	1.86299e-90	ENSMUSG00000038375	68728	Trp53inp2	transformation related protein 53 inducible nuclear protein 2
1975.01	0.842288	0.0415194	1.02411e-91	1.87406e-90	ENSMUSG00000040389	99512	Wdr47	WD repeat domain 47
5376.96	1.20283	0.0594006	1.16797e-91	2.1346e-90	ENSMUSG00000024966	20867	Stip1	stress-induced phosphoprotein 1
1092.5	1.32533	0.0655081	1.26825e-91	2.31493e-90	ENSMUSG00000039313	209743	Minar1	membrane integral NOTCH2 associated receptor 1
866.531	1.3095	0.0647369	1.41193e-91	2.57391e-90	ENSMUSG00000034285	18082	Nipsnap1	nipsnap homolog 1
2182.95	1.5295	0.0757273	1.49313e-91	2.71847e-90	ENSMUSG00000034981	231440	Parm1	prostate androgen-regulated mucin-like protein 1
459.156	-1.33164	0.0658743	1.75216e-91	3.18605e-90	ENSMUSG00000022105	19645	Rb1	RB transcriptional corepressor 1
356.484	-2.1055	0.104653	2.44865e-91	4.44688e-90	ENSMUSG00000020463	104570	Ppp4r3b	protein phosphatase 4 regulatory subunit 3B
1042.45	0.945653	0.0467692	3.44808e-91	6.254e-90	ENSMUSG00000015290	27643	Ubl4a	ubiquitin-like 4A
5654.88	0.930191	0.0460313	4.48017e-91	8.11571e-90	ENSMUSG00000006998	21762	Psmd2	proteasome (prosome, macropain) 26S subunit, non-ATPase, 2
3487.27	1.02985	0.0510132	5.70909e-91	1.03289e-89	ENSMUSG00000018765	23879	Fxr2	fragile X mental retardation, autosomal homolog 2
519.781	-3.9714	0.197651	6.3644e-91	1.15e-89	ENSMUSG00000039830	50913	Olig2	oligodendrocyte transcription factor 2
906.326	-3.37488	0.167868	7.85582e-91	1.4177e-89	ENSMUSG00000032517	17433	Mobp	myelin-associated oligodendrocytic basic protein
514.837	-1.58707	0.0790172	1.23913e-90	2.2334e-89	ENSMUSG00000029311	114664	Hsd17b11	hydroxysteroid (17-beta) dehydrogenase 11
927.833	1.42628	0.070963	1.436e-90	2.58498e-89	ENSMUSG00000015092	59022	Edf1	endothelial differentiation-related factor 1
1342.68	1.2964	0.0645368	2.48062e-90	4.45985e-89	ENSMUSG00000028670	26394	Lypla2	lysophospholipase 2
177.188	-4.08788	0.204566	5.06349e-90	9.09213e-89	ENSMUSG00000027452	68738	Acss1	acyl-CoA synthetase short-chain family member 1
1780.99	1.24607	0.0621594	6.42286e-90	1.15187e-88	ENSMUSG00000090071	12570	Cdk5r2	cyclin-dependent kinase 5, regulatory subunit 2 (p39)
1630.89	0.744936	0.0370957	7.31762e-90	1.31069e-88	ENSMUSG00000049106	320808	Dcaf5	DDB1 and CUL4 associated factor 5
579.01	-1.53109	0.0765521	7.8353e-90	1.40167e-88	ENSMUSG00000030660	18704	Pik3c2a	phosphatidylinositol-4-phosphate 3-kinase catalytic subunit type 2 alpha
678.856	-4.8106	0.241586	8.02164e-90	1.43322e-88	ENSMUSG00000047797	14618	Gjb1	gap junction protein, beta 1
1302.1	-1.97349	0.0989198	8.1058e-90	1.44646e-88	ENSMUSG00000024640	107272	Psat1	phosphoserine aminotransferase 1
768.165	-1.38693	0.0693068	9.19998e-90	1.63967e-88	ENSMUSG00000045515	18993	Pou3f3	POU domain, class 3, transcription factor 3
1357.07	1.18195	0.0590111	1.04097e-89	1.85298e-88	ENSMUSG00000039463	77031	Slc9a8	solute carrier family 9 (sodium/hydrogen exchanger), member 8
264.726	-1.92933	0.0968056	1.29664e-89	2.30523e-88	ENSMUSG00000040681	15312	Hmgn1	high mobility group nucleosomal binding domain 1
318.716	-2.36082	0.118592	1.8275e-89	3.24499e-88	ENSMUSG00000051515	58238	Fam181b	family with sequence similarity 181, member B
605.014	1.04063	0.0519941	1.84866e-89	3.27851e-88	ENSMUSG00000015711	229589	Prune1	prune exopolyphosphatase
970.109	1.37122	0.0686409	1.92185e-89	3.40411e-88	ENSMUSG00000006731	14421	B4galnt1	beta-1,4-N-acetyl-galactosaminyl transferase 1
659.007	-1.50191	0.075248	1.93165e-89	3.41726e-88	ENSMUSG00000028445	69638	Enho	energy homeostasis associated
705.71	-1.91172	0.0961851	3.95581e-89	6.98957e-88	ENSMUSG00000070056	52065	Mfhas1	malignant fibrous histiocytoma amplified sequence 1
496.323	-2.17734	0.109713	5.71607e-89	1.00874e-87	ENSMUSG00000028868	242687	Wasf2	WASP family, member 2
1577.67	1.41438	0.0710265	6.11003e-89	1.07694e-87	ENSMUSG00000028328	21916	Tmod1	tropomodulin 1
5169.55	1.48839	0.0748333	8.11776e-89	1.42906e-87	ENSMUSG00000024083	224938	Pja2	praja ring finger ubiquitin ligase 2
6826.27	1.28871	0.0647626	1.11047e-88	1.95249e-87	ENSMUSG00000033595	213469	Lgi3	leucine-rich repeat LGI family, member 3
303.898	2.12399	0.107299	1.58099e-88	2.77639e-87	ENSMUSG00000000296	21987	Tpd52l1	tumor protein D52-like 1
511.681	-1.78226	0.0899656	1.85038e-88	3.24551e-87	ENSMUSG00000032741	252972	Tpcn1	two pore channel 1
391.152	1.31538	0.0662245	2.16066e-88	3.7851e-87	ENSMUSG00000006281	21745	Tep1	telomerase associated protein 1
1120.34	1.75192	0.0884595	2.22244e-88	3.88859e-87	ENSMUSG00000009035	223693	Tmem184b	transmembrane protein 184b
243.03	-5.8979	0.300687	2.61467e-88	4.5693e-87	ENSMUSG00000036905	12260	C1qb	complement component 1, q subcomponent, beta polypeptide
953.282	-4.39243	0.222229	2.67418e-88	4.66764e-87	ENSMUSG00000028517	67916	Plpp3	phospholipid phosphatase 3
505.97	1.49213	0.0752649	2.89663e-88	5.04976e-87	ENSMUSG00000019853	56016	Hebp2	heme binding protein 2
22460.8	1.70976	0.0863908	3.22633e-88	5.61772e-87	ENSMUSG00000023004	22143	Tuba1b	tubulin, alpha 1B
327.449	-1.99305	0.100849	3.313e-88	5.76165e-87	ENSMUSG00000106379	269629	Lhfpl3	lipoma HMGIC fusion partner-like 3
512.337	-4.85019	0.245965	3.52538e-88	6.12359e-87	ENSMUSG00000053398	236539	Phgdh	3-phosphoglycerate dehydrogenase
1254.77	-1.92957	0.0976798	4.28951e-88	7.44188e-87	ENSMUSG00000087141	433022	Plcxd2	phosphatidylinositol-specific phospholipase C, X domain containing 2
230.358	-3.80027	0.192265	5.22089e-88	9.04682e-87	ENSMUSG00000023885	21826	Thbs2	thrombospondin 2
3344.79	-5.15499	0.262489	1.03785e-87	1.79624e-86	ENSMUSG00000037625	18417	Cldn11	claudin 11
1489.96	0.683093	0.0344364	1.05254e-87	1.81946e-86	ENSMUSG00000014769	19170	Psmb1	proteasome (prosome, macropain) subunit, beta type 1
1275.08	0.74264	0.0374601	1.24378e-87	2.14747e-86	ENSMUSG00000014226	12301	Cacybp	calcyclin binding protein
10115.5	1.09715	0.0554393	1.45898e-87	2.51599e-86	ENSMUSG00000028452	269523	Vcp	valosin containing protein
862.556	1.43165	0.0725574	2.1775e-87	3.75058e-86	ENSMUSG00000026192	108147	Atic	5-aminoimidazole-4-carboxamide ribonucleotide formyltransferase/IMP cyclohydrolase
6899.31	1.38235	0.0700806	2.79363e-87	4.80604e-86	ENSMUSG00000000308	12716	Ckmt1	creatine kinase, mitochondrial 1, ubiquitous
237.239	2.47015	0.125733	3.61305e-87	6.2083e-86	ENSMUSG00000056423	224065	Uts2b	urotensin 2B
697.671	-1.78855	0.0911028	6.19842e-87	1.0638e-85	ENSMUSG00000022742	12892	Cpox	coproporphyrinogen oxidase
273.055	-3.47407	0.177019	1.05085e-86	1.80137e-85	ENSMUSG00000040584	18671	Abcb1a	ATP-binding cassette, sub-family B (MDR/TAP), member 1A
3525.79	1.41958	0.072336	1.83816e-86	3.14723e-85	ENSMUSG00000041073	192950	Nacad	NAC alpha domain containing
384.205	2.1555	0.110248	1.91908e-86	3.28185e-85	ENSMUSG00000029307	13406	Dmp1	dentin matrix protein 1
286.671	-4.20789	0.215268	2.47868e-86	4.23379e-85	ENSMUSG00000029781	27055	Fkbp9	FK506 binding protein 9
333.976	-1.8537	0.0948382	2.95376e-86	5.03928e-85	ENSMUSG00000039849	228866	Pcif1	phosphorylated CTD interacting factor 1
649.373	-2.0423	0.104658	4.23003e-86	7.20811e-85	ENSMUSG00000025278	286940	Flnb	filamin, beta
1432.09	1.32522	0.0676514	4.709e-86	8.01478e-85	ENSMUSG00000024601	66307	Isoc1	isochorismatase domain containing 1
3650.5	2.2158	0.113694	6.49324e-86	1.10385e-84	ENSMUSG00000053025	64176	Sv2b	synaptic vesicle glycoprotein 2 b
419.776	-3.61668	0.185393	9.64959e-86	1.63849e-84	ENSMUSG00000049521	104445	Cdc42ep1	CDC42 effector protein (Rho GTPase binding) 1
633.681	-1.49438	0.0766301	1.70402e-85	2.89e-84	ENSMUSG00000051234	19823	Rnf7	ring finger protein 7
616.678	-1.82997	0.0940638	1.84676e-85	3.12838e-84	ENSMUSG00000020263	216190	Appl2	adaptor protein, phosphotyrosine interaction, PH domain and leucine zipper containing 2
562.399	-1.18405	0.0606106	1.85791e-85	3.14357e-84	ENSMUSG00000031563	52357	Wwc2	WW, C2 and coiled-coil domain containing 2
570.776	1.78404	0.091725	2.23156e-85	3.77134e-84	ENSMUSG00000050132	237868	Sarm1	sterile alpha and HEAT/Armadillo motif containing 1
1146.39	0.873523	0.0446748	2.26562e-85	3.8244e-84	ENSMUSG00000039067	17463	Psmd7	proteasome (prosome, macropain) 26S subunit, non-ATPase, 7
219.827	-2.10363	0.108349	2.78717e-85	4.69926e-84	ENSMUSG00000043671	233115	Dpy19l3	dpy-19-like 3 (C. elegans)
8249.72	1.0668	0.0546341	2.80582e-85	4.72515e-84	ENSMUSG00000034926	74754	Dhcr24	24-dehydrocholesterol reductase
1332.86	1.20188	0.0616308	3.49287e-85	5.87531e-84	ENSMUSG00000020740	260302	Gga3	golgi associated, gamma adaptin ear containing, ARF binding protein 3
364.21	1.83998	0.0947511	3.6128e-85	6.06992e-84	ENSMUSG00000028755	72269	Cda	cytidine deaminase
4470.1	0.894731	0.0458665	5.37455e-85	9.01932e-84	ENSMUSG00000037351	226977	Actr1b	ARP1 actin-related protein 1B, centractin beta
1101.29	1.25682	0.0645615	6.03923e-85	1.01229e-83	ENSMUSG00000029869	13848	Ephb6	Eph receptor B6
422.007	1.25461	0.0644627	6.61157e-85	1.10694e-83	ENSMUSG00000032872	266690	Cyb5r4	cytochrome b5 reductase 4
910.541	1.52266	0.0783856	6.95603e-85	1.16325e-83	ENSMUSG00000022003	67554	Slc25a30	solute carrier family 25, member 30
3494.77	1.22141	0.0627744	7.92352e-85	1.32351e-83	ENSMUSG00000036667	77574	Tcaf1	TRPM8 channel-associated factor 1
32551.9	-4.44282	0.229738	1.07244e-84	1.78926e-83	ENSMUSG00000031425	18823	Plp1	proteolipid protein (myelin) 1
709.879	-1.35643	0.06983	1.08414e-84	1.8067e-83	ENSMUSG00000038366	16796	Lasp1	LIM and SH3 protein 1
1617.34	1.16547	0.0599319	1.09824e-84	1.82806e-83	ENSMUSG00000055733	54561	Nap1l3	nucleosome assembly protein 1-like 3
1454.23	0.868051	0.0446025	1.35227e-84	2.24831e-83	ENSMUSG00000032606	66257	Nicn1	nicolin 1
206.173	-3.51513	0.181421	1.36191e-84	2.26172e-83	ENSMUSG00000021127	12192	Zfp36l1	zinc finger protein 36, C3H type-like 1
213.493	-2.04672	0.105886	1.53553e-84	2.5471e-83	ENSMUSG00000078684	NA	NA	NA
10230.6	1.24779	0.0642553	1.56026e-84	2.58513e-83	ENSMUSG00000042744	269700	Hectd4	HECT domain E3 ubiquitin protein ligase 4
3230	1.24035	0.0638707	1.57564e-84	2.60762e-83	ENSMUSG00000059316	26569	Slc27a4	solute carrier family 27 (fatty acid transporter), member 4
339.165	-3.7793	0.195232	1.57893e-84	2.61005e-83	ENSMUSG00000017493	16010	Igfbp4	insulin-like growth factor binding protein 4
835.477	-1.37584	0.0709128	1.6106e-84	2.65934e-83	ENSMUSG00000026664	16922	Phyh	phytanoyl-CoA hydroxylase
9132.12	0.96627	0.0497611	2.74578e-84	4.5285e-83	ENSMUSG00000022594	23936	Lynx1	Ly6/neurotoxin 1
1036.47	1.48884	0.0769302	3.09765e-84	5.10295e-83	ENSMUSG00000019261	270058	Map1s	microtubule-associated protein 1S
4328.31	1.10213	0.0568391	3.71598e-84	6.11456e-83	ENSMUSG00000039716	208869	Dock3	dedicator of cyto-kinesis 3
1925.88	1.34175	0.0693223	4.33368e-84	7.1228e-83	ENSMUSG00000031790	17388	Mmp15	matrix metallopeptidase 15
2170.19	1.00778	0.0519785	4.58188e-84	7.52214e-83	ENSMUSG00000039230	108903	Tbcd	tubulin-specific chaperone d
228.876	-4.10743	0.213043	5.08756e-84	8.34278e-83	ENSMUSG00000050666	320736	Vstm4	V-set and transmembrane domain containing 4
1921.3	0.785275	0.0404994	6.1299e-84	1.00406e-82	ENSMUSG00000034707	75612	Gns	glucosamine (N-acetyl)-6-sulfatase
148.213	-2.96654	0.153788	6.79307e-84	1.11142e-82	ENSMUSG00000021613	12950	Hapln1	hyaluronan and proteoglycan link protein 1
2066.52	1.97123	0.102372	6.95311e-84	1.13631e-82	ENSMUSG00000068373	241589	D430041D05Rik	RIKEN cDNA D430041D05 gene
205.677	-2.68414	0.139284	7.16262e-84	1.16922e-82	ENSMUSG00000075012	14221	Fjx1	four jointed box 1
731.06	1.02895	0.0531962	1.07676e-83	1.75569e-82	ENSMUSG00000042680	381126	Garem1	GRB2 associated regulator of MAPK1 subtype 1
269.619	-3.92396	0.203903	1.23949e-83	2.01874e-82	ENSMUSG00000015224	74519	Cyp2j9	cytochrome P450, family 2, subfamily j, polypeptide 9
3466.78	0.974102	0.050405	1.63987e-83	2.66781e-82	ENSMUSG00000013160	11972	Atp6v0d1	ATPase, H+ transporting, lysosomal V0 subunit D1
790.876	2.6399	0.137482	2.56281e-83	4.16457e-82	ENSMUSG00000060594	244864	Layn	layilin
194.431	-5.14622	0.269317	3.13826e-83	5.09392e-82	ENSMUSG00000036887	12259	C1qa	complement component 1, q subcomponent, alpha polypeptide
1788.15	-2.43659	0.127241	5.4459e-83	8.82961e-82	ENSMUSG00000060716	211945	Plekhh1	pleckstrin homology domain containing, family H (with MyTH4 domain) member 1
573.998	2.18433	0.114154	6.1807e-83	1.00097e-81	ENSMUSG00000059173	18573	Pde1a	phosphodiesterase 1A, calmodulin-dependent
1250.26	1.24094	0.0645692	7.71016e-83	1.24726e-81	ENSMUSG00000056211	226412	R3hdm1	R3H domain containing 1
931.135	1.59685	0.0833278	9.04746e-83	1.46194e-81	ENSMUSG00000018395	16568	Kif3a	kinesin family member 3A
1020.34	-2.52022	0.131799	1.02132e-82	1.64846e-81	ENSMUSG00000019996	17761	Map7	microtubule-associated protein 7
880.689	0.949489	0.0493787	1.10693e-82	1.78462e-81	ENSMUSG00000035476	66724	Tab3	TGF-beta activated kinase 1/MAP3K7 binding protein 3
16261.6	0.731387	0.0380231	1.29734e-82	2.08928e-81	ENSMUSG00000040724	16490	Kcna2	potassium voltage-gated channel, shaker-related subfamily, member 2
537.115	2.05664	0.107756	1.65306e-82	2.65915e-81	ENSMUSG00000024939	17826	Fam89b	family with sequence similarity 89, member B
692.519	-1.47964	0.0773151	2.02171e-82	3.24852e-81	ENSMUSG00000021540	17129	Smad5	SMAD family member 5
1218.62	1.37191	0.0716503	2.22896e-82	3.57754e-81	ENSMUSG00000031822	382034	Gse1	genetic suppressor element 1, coiled-coil protein
366.752	-1.56287	0.0817992	2.97198e-82	4.76479e-81	ENSMUSG00000052812	320817	Atad2b	ATPase family, AAA domain containing 2B
961.162	1.30754	0.0683168	3.04191e-82	4.87146e-81	ENSMUSG00000032504	18571	Pdcd6ip	programmed cell death 6 interacting protein
1682.84	1.49376	0.0781632	3.27481e-82	5.2386e-81	ENSMUSG00000026558	80914	Uck2	uridine-cytidine kinase 2
1330.03	0.85298	0.0445199	4.8174e-82	7.69766e-81	ENSMUSG00000095463	67464	Entpd4	ectonucleoside triphosphate diphosphohydrolase 4
1198.47	1.09172	0.0570528	5.23491e-82	8.3555e-81	ENSMUSG00000027134	99010	Lpcat4	lysophosphatidylcholine acyltransferase 4
19287.6	0.530365	0.0276667	5.49836e-82	8.76626e-81	ENSMUSG00000025393	11947	Atp5b	ATP synthase, H+ transporting mitochondrial F1 complex, beta subunit
3697.56	0.560693	0.0292674	6.79183e-82	1.08165e-80	ENSMUSG00000071659	68693	Hnrnpul2	heterogeneous nuclear ribonucleoprotein U-like 2
618.594	1.69893	0.0892771	9.00145e-82	1.43196e-80	ENSMUSG00000053137	19094	Mapk11	mitogen-activated protein kinase 11
114.517	-3.26415	0.171493	1.0496e-81	1.66787e-80	ENSMUSG00000030844	67865	Rgs10	regulator of G-protein signalling 10
1284.79	1.35409	0.0710839	1.52593e-81	2.4221e-80	ENSMUSG00000003033	11767	Ap1m1	adaptor-related protein complex AP-1, mu subunit 1
1625.83	1.68513	0.088689	1.6305e-81	2.58522e-80	ENSMUSG00000040721	239102	Zfhx2	zinc finger homeobox 2
4064.17	1.11153	0.0582841	1.72746e-81	2.73594e-80	ENSMUSG00000028991	56717	Mtor	mechanistic target of rapamycin kinase
1589.73	-1.23026	0.0645646	1.83843e-81	2.90849e-80	ENSMUSG00000057614	14677	Gnai1	guanine nucleotide binding protein (G protein), alpha inhibiting 1
643.674	1.33631	0.0701847	1.90372e-81	3.00846e-80	ENSMUSG00000023088	17250	Abcc1	ATP-binding cassette, sub-family C (CFTR/MRP), member 1
619.109	1.67902	0.0884287	2.13009e-81	3.3588e-80	ENSMUSG00000021596	78771	Mctp1	multiple C2 domains, transmembrane 1
866.441	-1.04178	0.0546385	2.13002e-81	3.3588e-80	ENSMUSG00000071793	381598	2610005L07Rik	cadherin 11 pseudogene
1973.4	1.19241	0.062601	2.28068e-81	3.59232e-80	ENSMUSG00000022208	319984	Jph4	junctophilin 4
896.569	1.33632	0.0702387	2.50761e-81	3.94544e-80	ENSMUSG00000031841	12554	Cdh13	cadherin 13
17538.2	1.41047	0.0742385	3.43095e-81	5.39229e-80	ENSMUSG00000027254	17754	Map1a	microtubule-associated protein 1 A
176.873	-2.39826	0.126693	3.4649e-81	5.4397e-80	ENSMUSG00000027428	26450	Rbbp9	retinoblastoma binding protein 9, serine hydrolase
1258	0.878196	0.0461705	6.6385e-81	1.04107e-79	ENSMUSG00000022661	17470	Cd200	CD200 antigen
1486.4	-1.22441	0.0644872	6.79236e-81	1.06404e-79	ENSMUSG00000034297	327987	Med13	mediator complex subunit 13
620.972	-2.19008	0.116015	8.32895e-81	1.30333e-79	ENSMUSG00000039701	99526	Usp53	ubiquitin specific peptidase 53
1754.75	0.850849	0.0447574	8.41168e-81	1.31484e-79	ENSMUSG00000032601	19087	Prkar2a	protein kinase, cAMP dependent regulatory, type II alpha
2376.12	0.751536	0.0395298	9.20752e-81	1.43767e-79	ENSMUSG00000019818	53599	Cd164	CD164 antigen
2211.8	2.21273	0.117274	1.00025e-80	1.5601e-79	ENSMUSG00000023186	67776	Vwa5a	von Willebrand factor A domain containing 5A
352.458	-2.2638	0.120019	1.13617e-80	1.77019e-79	ENSMUSG00000052397	22350	Ezr	ezrin
668.677	-2.67793	0.141865	1.33846e-80	2.0831e-79	ENSMUSG00000024176	20681	Sox8	SRY (sex determining region Y)-box 8
238.343	-3.31711	0.175554	1.46095e-80	2.27127e-79	ENSMUSG00000037295	100017	Ldlrap1	low density lipoprotein receptor adaptor protein 1
2098.85	1.31975	0.0697053	1.50923e-80	2.34379e-79	ENSMUSG00000024462	54393	Gabbr1	gamma-aminobutyric acid (GABA) B receptor, 1
3675.38	0.638777	0.0336593	1.98071e-80	3.07267e-79	ENSMUSG00000019124	69938	Scrn1	secernin 1
357.425	-2.32817	0.123647	2.1956e-80	3.40235e-79	ENSMUSG00000060487	320825	Samd5	sterile alpha motif domain containing 5
3898.37	-4.62393	0.246196	3.53046e-80	5.46499e-79	ENSMUSG00000030307	243616	Slc6a11	solute carrier family 6 (neurotransmitter transporter, GABA), member 11
5413.89	0.860493	0.045452	3.68537e-80	5.69863e-79	ENSMUSG00000024393	53761	Prrc2a	proline-rich coiled-coil 2A
2814.15	1.03217	0.0545845	4.319e-80	6.67123e-79	ENSMUSG00000022905	16646	Kpna1	karyopherin (importin) alpha 1
4996.48	1.06297	0.0563493	9.70407e-80	1.4973e-78	ENSMUSG00000031824	234797	6430548M08Rik	RIKEN cDNA 6430548M08 gene
3233.05	1.59046	0.0846121	9.84074e-80	1.51676e-78	ENSMUSG00000029598	71772	Plbd2	phospholipase B domain containing 2
161.734	-4.93703	0.263989	9.9491e-80	1.53182e-78	ENSMUSG00000000957	17387	Mmp14	matrix metallopeptidase 14 (membrane-inserted)
4426.24	0.785474	0.0415963	1.02003e-79	1.56881e-78	ENSMUSG00000023032	59033	Slc4a8	solute carrier family 4 (anion exchanger), member 8
446.19	-3.31918	0.17669	1.16096e-79	1.78365e-78	ENSMUSG00000073910	214944	Mob3b	MOB kinase activator 3B
1001.23	-0.900433	0.0477423	1.35431e-79	2.07849e-78	ENSMUSG00000029050	20481	Ski	ski sarcoma viral oncogene homolog (avian)
313.824	-5.09234	0.272792	1.45807e-79	2.23535e-78	ENSMUSG00000030342	12527	Cd9	CD9 antigen
1221.17	1.03191	0.0547659	1.5441e-79	2.36472e-78	ENSMUSG00000040009	14687	Gnaz	guanine nucleotide binding protein, alpha z subunit
7594.96	1.04343	0.05541	1.86832e-79	2.85819e-78	ENSMUSG00000022285	22631	Ywhaz	tyrosine 3-monooxygenase/tryptophan 5-monooxygenase activation protein, zeta polypeptide
3411.31	0.746653	0.0396421	2.66548e-79	4.07337e-78	ENSMUSG00000047514	22110	Tspyl1	testis-specific protein, Y-encoded-like 1
1986.73	1.06055	0.056397	2.95701e-79	4.51407e-78	ENSMUSG00000026640	18845	Plxna2	plexin A2
202.683	1.83942	0.0983378	3.06224e-79	4.66975e-78	ENSMUSG00000070305	319742	Mpzl3	myelin protein zero-like 3
399.193	1.97526	0.105696	3.3687e-79	5.13164e-78	ENSMUSG00000038760	22045	Trhr	thyrotropin releasing hormone receptor
2256.12	1.96676	0.105268	3.73099e-79	5.67751e-78	ENSMUSG00000025224	107338	Gbf1	golgi-specific brefeldin A-resistance factor 1
1495.42	-0.924697	0.0491746	3.75744e-79	5.7117e-78	ENSMUSG00000035936	214579	Aldh5a1	aldhehyde dehydrogenase family 5, subfamily A1
392.451	-2.99617	0.160138	4.34029e-79	6.59073e-78	ENSMUSG00000044288	12801	Cnr1	cannabinoid receptor 1 (brain)
1337.43	0.751498	0.039966	4.79624e-79	7.27539e-78	ENSMUSG00000032047	110446	Acat1	acetyl-Coenzyme A acetyltransferase 1
966.997	0.936428	0.0498602	5.72752e-79	8.67888e-78	ENSMUSG00000031202	67790	Rab39b	RAB39B, member RAS oncogene family
2336.64	-0.907714	0.0483356	6.16671e-79	9.33454e-78	ENSMUSG00000042066	68875	Tmcc2	transmembrane and coiled-coil domains 2
1781.61	0.631049	0.033583	6.88284e-79	1.04076e-77	ENSMUSG00000015087	227624	Rabl6	RAB, member RAS oncogene family-like 6
838.318	1.49827	0.0801472	8.71625e-79	1.3166e-77	ENSMUSG00000042846	216028	Lrrtm3	leucine rich repeat transmembrane neuronal 3
5320.16	1.17338	0.0626301	8.87796e-79	1.33962e-77	ENSMUSG00000030729	70974	Pgm2l1	phosphoglucomutase 2-like 1
871.123	1.2675	0.0677047	9.3864e-79	1.41486e-77	ENSMUSG00000008226	74616	Scrn3	secernin 3
401.05	-2.53117	0.13584	1.06888e-78	1.6078e-77	ENSMUSG00000022323	15473	Rida	reactive intermediate imine deaminase A homolog
1323.47	-0.991187	0.0528822	1.06866e-78	1.6078e-77	ENSMUSG00000058443	100043346	Rpl10-ps3	ribosomal protein L10, pseudogene 3
480.274	1.43058	0.0765466	1.1445e-78	1.71974e-77	ENSMUSG00000022306	22762	Zfpm2	zinc finger protein, multitype 2
242.385	-2.02122	0.108571	1.21917e-78	1.83003e-77	ENSMUSG00000035226	241770	Rims4	regulating synaptic membrane exocytosis 4
249.808	-2.06008	0.110674	1.23839e-78	1.85694e-77	ENSMUSG00000028878	230789	Fam76a	family with sequence similarity 76, member A
1000.75	-1.43939	0.0770588	1.34558e-78	2.01557e-77	ENSMUSG00000062901	75785	Klhl24	kelch-like 24
883.116	1.54929	0.0830623	1.66575e-78	2.49256e-77	ENSMUSG00000039148	20227	Sart1	squamous cell carcinoma antigen recognized by T cells 1
1163.69	1.09776	0.0586886	1.82232e-78	2.72401e-77	ENSMUSG00000026280	66615	Atg4b	autophagy related 4B, cysteine peptidase
4379.55	-5.13068	0.276954	1.92646e-78	2.87668e-77	ENSMUSG00000027375	17153	Mal	myelin and lymphocyte protein, T cell differentiation protein
636.682	1.19321	0.0639567	3.71539e-78	5.54222e-77	ENSMUSG00000010936	234729	Vac14	Vac14 homolog (S. cerevisiae)
1741.62	1.23758	0.0663798	4.26163e-78	6.35045e-77	ENSMUSG00000068742	12953	Cry2	cryptochrome 2 (photolyase-like)
611.45	-1.36767	0.0734599	5.08432e-78	7.56853e-77	ENSMUSG00000022261	15529	Sdc2	syndecan 2
1422.74	2.40466	0.129745	5.92428e-78	8.80976e-77	ENSMUSG00000000632	20370	Sez6	seizure related gene 6
3909.01	0.716842	0.0384304	8.39987e-78	1.24782e-76	ENSMUSG00000000826	13002	Dnajc5	DnaJ heat shock protein family (Hsp40) member C5
606.417	1.2556	0.0675098	9.49953e-78	1.40972e-76	ENSMUSG00000035713	244144	Usp35	ubiquitin specific peptidase 35
2896.54	0.647423	0.0347245	1.05414e-77	1.56271e-76	ENSMUSG00000074582	99371	Arfgef2	ADP-ribosylation factor guanine nucleotide-exchange factor 2 (brefeldin A-inhibited)
897.893	-1.27923	0.0688142	1.06741e-77	1.58076e-76	ENSMUSG00000055485	320706	Soga1	suppressor of glucose, autophagy associated 1
542.577	1.36212	0.0733159	1.07023e-77	1.58331e-76	ENSMUSG00000031398	18846	Plxna3	plexin A3
1881.2	0.988797	0.0531266	1.25241e-77	1.85091e-76	ENSMUSG00000035078	210376	Mtmr9	myotubularin related protein 9
1173.62	0.913416	0.0491201	1.91639e-77	2.82929e-76	ENSMUSG00000022601	271377	Zbtb11	zinc finger and BTB domain containing 11
957.732	1.06248	0.0571939	2.13043e-77	3.14206e-76	ENSMUSG00000028469	230103	Npr2	natriuretic peptide receptor 2
1098.59	-0.849206	0.0456841	2.38501e-77	3.51391e-76	ENSMUSG00000028194	69219	Ddah1	dimethylarginine dimethylaminohydrolase 1
10774.6	0.975996	0.0525411	2.51292e-77	3.69857e-76	ENSMUSG00000047976	16485	Kcna1	potassium voltage-gated channel, shaker-related subfamily, member 1
840.592	0.989934	0.0533356	3.27177e-77	4.81054e-76	ENSMUSG00000025280	218832	Polr3a	polymerase (RNA) III (DNA directed) polypeptide A
986.107	1.00136	0.0539764	3.77135e-77	5.53941e-76	ENSMUSG00000043542	67306	Zc2hc1a	zinc finger, C2HC-type containing 1A
688.995	1.43185	0.0774622	5.15389e-77	7.56237e-76	ENSMUSG00000036995	230837	Asap3	ArfGAP with SH3 domain, ankyrin repeat and PH domain 3
816.402	3.60267	0.195265	5.38507e-77	7.89353e-76	ENSMUSG00000005611	17540	Irag1	inositol 1,4,5-triphosphate receptor associated 1
2183.69	0.521594	0.0281007	5.49274e-77	8.04314e-76	ENSMUSG00000021178	19179	Psmc1	protease (prosome, macropain) 26S subunit, ATPase 1
1802.94	2.55269	0.13877	9.16623e-77	1.34086e-75	ENSMUSG00000024942	12333	Capn1	calpain 1
761.525	-2.78043	0.151166	1.27165e-76	1.85832e-75	ENSMUSG00000102918	93706	Pcdhgc3	protocadherin gamma subfamily C, 3
606.202	-1.51895	0.0824573	1.3273e-76	1.93767e-75	ENSMUSG00000027220	80976	Syt13	synaptotagmin XIII
1689.73	0.742399	0.0401585	1.80718e-76	2.63555e-75	ENSMUSG00000057455	19762	Rit2	Ras-like without CAAX 2
1813.36	0.99385	0.0538221	1.89711e-76	2.7639e-75	ENSMUSG00000042078	68666	Svop	SV2 related protein
254.523	-2.8756	0.156479	1.90688e-76	2.77532e-75	ENSMUSG00000038456	209773	Dennd2a	DENN/MADD domain containing 2A
413.987	-1.72761	0.0940629	2.11843e-76	3.08008e-75	ENSMUSG00000027808	28146	Serp1	stress-associated endoplasmic reticulum protein 1
3695.44	-1.12183	0.0608723	2.94047e-76	4.27096e-75	ENSMUSG00000054364	11852	Rhob	ras homolog family member B
565.455	-2.28351	0.124673	3.01885e-76	4.38039e-75	ENSMUSG00000031673	12552	Cdh11	cadherin 11
546.07	-5.28937	0.290154	3.33059e-76	4.82785e-75	ENSMUSG00000040055	14623	Gjb6	gap junction protein, beta 6
1067.3	0.802405	0.0435218	4.24197e-76	6.14273e-75	ENSMUSG00000021911	26430	Parg	poly (ADP-ribose) glycohydrolase
557.303	-3.73134	0.203548	4.35264e-76	6.29664e-75	ENSMUSG00000010175	19130	Prox1	prospero homeobox 1
3027.95	0.978967	0.0531746	5.37998e-76	7.77499e-75	ENSMUSG00000045210	70675	Vcpip1	valosin containing protein (p97)/p47 complex interacting protein 1
347.259	-2.6116	0.142687	5.38633e-76	7.77634e-75	ENSMUSG00000060843	216033	Ctnna3	catenin (cadherin associated protein), alpha 3
244.482	1.40216	0.0763641	5.40256e-76	7.79195e-75	ENSMUSG00000051502	70240	Ufsp1	UFM1-specific peptidase 1
806.476	1.16031	0.0631002	5.79213e-76	8.34543e-75	ENSMUSG00000063904	75221	Dpp3	dipeptidylpeptidase 3
493.828	-1.372	0.0748179	9.02026e-76	1.29836e-74	ENSMUSG00000036019	278279	Tmtc2	transmembrane and tetratricopeptide repeat containing 2
1157.46	1.424	0.077695	9.45673e-76	1.35982e-74	ENSMUSG00000022757	21787	Tfg	Trk-fused gene
501.397	1.05452	0.0574035	9.91432e-76	1.42419e-74	ENSMUSG00000032834	110816	Pwp2	PWP2 periodic tryptophan protein homolog (yeast)
241.883	-2.29603	0.125861	1.16763e-75	1.67562e-74	ENSMUSG00000025702	71779	Marchf8	membrane associated ring-CH-type finger 8
1497.92	1.09756	0.059812	1.32681e-75	1.90216e-74	ENSMUSG00000069729	239985	Arid1b	AT rich interactive domain 1B (SWI-like)
308.561	-4.17092	0.228738	1.62741e-75	2.33079e-74	ENSMUSG00000019232	71760	Etnppl	ethanolamine phosphate phospholyase
848.989	-2.0544	0.112854	2.41127e-75	3.44999e-74	ENSMUSG00000039959	215114	Hip1	huntingtin interacting protein 1
1003.42	0.818735	0.0446398	2.43926e-75	3.48656e-74	ENSMUSG00000031511	54126	Arhgef7	Rho guanine nucleotide exchange factor (GEF7)
279.254	-1.77829	0.0975733	2.52309e-75	3.6028e-74	ENSMUSG00000052430	12167	Bmpr1b	bone morphogenetic protein receptor, type 1B
4487.68	1.06815	0.0583361	2.91865e-75	4.1635e-74	ENSMUSG00000031451	14456	Gas6	growth arrest specific 6
1301.89	0.916134	0.050019	3.39125e-75	4.83287e-74	ENSMUSG00000048486	228859	Fitm2	fat storage-inducing transmembrane protein 2
669.971	-5.00631	0.27625	3.91774e-75	5.57763e-74	ENSMUSG00000031775	67801	Pllp	plasma membrane proteolipid
442.703	-4.58765	0.252705	4.11835e-75	5.85743e-74	ENSMUSG00000030317	110595	Timp4	tissue inhibitor of metalloproteinase 4
1643.33	1.01776	0.0556529	4.8376e-75	6.8736e-74	ENSMUSG00000028953	27407	Abcf2	ATP-binding cassette, sub-family F (GCN20), member 2
3420.89	1.4872	0.0816249	5.81437e-75	8.2533e-74	ENSMUSG00000078307	330941	AI593442	expressed sequence AI593442
525.445	-1.96153	0.10803	6.25219e-75	8.86602e-74	ENSMUSG00000040021	16798	Lats1	large tumor suppressor
302.901	-2.14452	0.118237	7.73746e-75	1.09614e-73	ENSMUSG00000060743	15078	H3f3a	H3.3 histone A
5212.71	0.945323	0.0517756	9.34246e-75	1.32221e-73	ENSMUSG00000017167	53321	Cntnap1	contactin associated protein-like 1
775.128	2.48273	0.136897	9.71685e-75	1.37384e-73	ENSMUSG00000057897	12323	Camk2b	calcium/calmodulin-dependent protein kinase II, beta
155.773	-4.64873	0.256916	1.12078e-74	1.58309e-73	ENSMUSG00000036896	12262	C1qc	complement component 1, q subcomponent, C chain
2805.85	0.756776	0.0414719	1.44709e-74	2.04199e-73	ENSMUSG00000038264	20361	Sema7a	sema domain, immunoglobulin domain (Ig), and GPI membrane anchor, (semaphorin) 7A
390.623	-4.94472	0.273977	1.67049e-74	2.35492e-73	ENSMUSG00000026255	98363	Efhd1	EF hand domain containing 1
905.326	1.40537	0.0773605	1.90615e-74	2.6845e-73	ENSMUSG00000011589	240121	Fsd1	fibronectin type 3 and SPRY domain-containing protein
1270.98	1.16767	0.0641951	2.19193e-74	3.08395e-73	ENSMUSG00000053199	244867	Arhgap20	Rho GTPase activating protein 20
428.398	2.28111	0.126241	2.70919e-74	3.80797e-73	ENSMUSG00000041669	170952	Prima1	proline rich membrane anchor 1
482.955	-3.77047	0.208341	3.01671e-74	4.23608e-73	ENSMUSG00000018166	13867	Erbb3	erb-b2 receptor tyrosine kinase 3
1689.63	1.2858	0.0708703	3.92673e-74	5.50854e-73	ENSMUSG00000001229	224897	Dpp9	dipeptidylpeptidase 9
27368.6	1.68731	0.093461	7.1026e-74	9.95403e-73	ENSMUSG00000062825	11465	Actg1	actin, gamma, cytoplasmic 1
1256.57	-1.57754	0.0873852	9.58897e-74	1.34255e-72	ENSMUSG00000026447	240752	Pik3c2b	phosphatidylinositol-4-phosphate 3-kinase catalytic subunit type 2 beta
633.815	1.96491	0.109149	1.03772e-73	1.4515e-72	ENSMUSG00000020823	74136	Sec14l1	SEC14-like lipid binding 1
3590.34	1.29108	0.0713762	1.04836e-73	1.46496e-72	ENSMUSG00000022658	56370	Tagln3	transgelin 3
450.883	1.22152	0.0674999	1.05889e-73	1.47823e-72	ENSMUSG00000045624	66580	Esf1	ESF1 nucleolar pre-rRNA processing protein homolog
537.081	-1.1915	0.0658483	1.17129e-73	1.63355e-72	ENSMUSG00000049303	171180	Syt12	synaptotagmin XII
826.386	1.38164	0.0764831	1.29008e-73	1.79748e-72	ENSMUSG00000063434	66673	Sorcs3	sortilin-related VPS10 domain containing receptor 3
4258.65	1.3178	0.0729385	1.4398e-73	2.00414e-72	ENSMUSG00000002052	20926	Supt6	SPT6, histone chaperone and transcription elongation factor
3280.97	0.840061	0.0463731	1.46804e-73	2.04147e-72	ENSMUSG00000026229	70247	Psmd1	proteasome (prosome, macropain) 26S subunit, non-ATPase, 1
407.026	-1.44263	0.0799963	1.93041e-73	2.68185e-72	ENSMUSG00000031538	18791	Plat	plasminogen activator, tissue
972.231	1.08725	0.0601419	1.94706e-73	2.70237e-72	ENSMUSG00000029345	54723	Tfip11	tuftelin interacting protein 11
5795.57	0.874446	0.0483281	2.06469e-73	2.86286e-72	ENSMUSG00000068740	53883	Celsr2	cadherin, EGF LAG seven-pass G-type receptor 2
3471.53	1.02446	0.05667	2.20224e-73	3.05064e-72	ENSMUSG00000067851	211673	Arfgef1	ADP-ribosylation factor guanine nucleotide-exchange factor 1(brefeldin A-inhibited)
770.343	1.09043	0.0603495	2.29726e-73	3.1792e-72	ENSMUSG00000027971	64580	Ndst4	N-deacetylase/N-sulfotransferase (heparin glucosaminyl) 4
1312.76	1.65789	0.0921503	2.36412e-73	3.26858e-72	ENSMUSG00000032312	12988	Csk	c-src tyrosine kinase
941.966	-1.47919	0.0821639	3.06215e-73	4.22959e-72	ENSMUSG00000040659	27984	Efhd2	EF hand domain containing 2
2220.16	-1.11107	0.0615694	3.33461e-73	4.60151e-72	ENSMUSG00000055013	347722	Agap1	ArfGAP with GTPase domain, ankyrin repeat and PH domain 1
807.588	2.24436	0.125181	3.3823e-73	4.66283e-72	ENSMUSG00000020681	11421	Ace	angiotensin I converting enzyme (peptidyl-dipeptidase A) 1
1440.12	1.17063	0.0649036	3.51093e-73	4.83553e-72	ENSMUSG00000058799	53605	Nap1l1	nucleosome assembly protein 1-like 1
864.033	1.08387	0.0601593	5.96563e-73	8.20846e-72	ENSMUSG00000029098	80911	Acox3	acyl-Coenzyme A oxidase 3, pristanoyl
136.498	-4.76573	0.266941	7.32518e-73	1.00695e-71	ENSMUSG00000031610	20284	Scrg1	scrapie responsive gene 1
221.178	-2.83868	0.15872	1.407e-72	1.93227e-71	ENSMUSG00000032402	17127	Smad3	SMAD family member 3
4102.7	0.784319	0.0435944	1.48659e-72	2.03962e-71	ENSMUSG00000042506	216825	Usp22	ubiquitin specific peptidase 22
4334.08	0.963778	0.0536336	1.71196e-72	2.3466e-71	ENSMUSG00000016541	54138	Atxn10	ataxin 10
4230.84	1.04097	0.0579741	1.93529e-72	2.65019e-71	ENSMUSG00000022391	19387	Rangap1	RAN GTPase activating protein 1
129.129	-4.69846	0.263974	2.12805e-72	2.91137e-71	ENSMUSG00000054675	231633	Tmem119	transmembrane protein 119
339.26	-3.05611	0.171013	2.17873e-72	2.97787e-71	ENSMUSG00000000184	12444	Ccnd2	cyclin D2
200.619	-2.18253	0.122455	2.23503e-72	3.05192e-71	ENSMUSG00000000340	13171	Dbt	dihydrolipoamide branched chain transacylase E2
1325.12	1.05029	0.0585956	3.34381e-72	4.56162e-71	ENSMUSG00000071658	14704	Gng3	guanine nucleotide binding protein (G protein), gamma 3
1906.62	0.923027	0.0514679	3.46379e-72	4.72081e-71	ENSMUSG00000042873	269788	Lhfpl4	lipoma HMGIC fusion partner-like protein 4
212.051	-2.70995	0.15205	3.66587e-72	4.99148e-71	ENSMUSG00000056648	15416	Hoxb8	homeobox B8
1179.49	0.97297	0.0542816	3.80681e-72	5.17849e-71	ENSMUSG00000002017	72722	Fam98a	family with sequence similarity 98, member A
203.576	-3.65877	0.205156	3.81436e-72	5.18385e-71	ENSMUSG00000025239	29806	Limd1	LIM domains containing 1
2809.83	0.884854	0.0493472	3.85202e-72	5.23008e-71	ENSMUSG00000027397	20515	Slc20a1	solute carrier family 20, member 1
1192.29	1.10227	0.0615414	3.8609e-72	5.23718e-71	ENSMUSG00000021066	73991	Atl1	atlastin GTPase 1
174.425	-4.2138	0.236755	4.10027e-72	5.55664e-71	ENSMUSG00000019577	27273	Pdk4	pyruvate dehydrogenase kinase, isoenzyme 4
455.577	1.79332	0.100688	4.38799e-72	5.94095e-71	ENSMUSG00000050705	69662	2310061I04Rik	RIKEN cDNA 2310061I04 gene
3604.56	0.689645	0.038451	4.49181e-72	6.07579e-71	ENSMUSG00000024853	319322	Sf3b2	splicing factor 3b, subunit 2
1283.52	1.0587	0.0591246	4.5683e-72	6.17344e-71	ENSMUSG00000062929	12632	Cfl2	cofilin 2, muscle
815.861	1.57539	0.0883184	4.62657e-72	6.2463e-71	ENSMUSG00000016757	223723	Ttll12	tubulin tyrosine ligase-like family, member 12
545.994	1.12038	0.0626075	4.9462e-72	6.67156e-71	ENSMUSG00000030056	57905	Isy1	ISY1 splicing factor homolog
797.497	-1.09136	0.0610176	6.18638e-72	8.33652e-71	ENSMUSG00000026112	76178	Coa5	cytochrome C oxidase assembly factor 5
1041.33	1.16909	0.0654049	6.49128e-72	8.7392e-71	ENSMUSG00000063884	69956	Ptcd3	pentatricopeptide repeat domain 3
258.782	2.29562	0.129281	7.53505e-72	1.01349e-70	ENSMUSG00000020901	320207	Pik3r5	phosphoinositide-3-kinase regulatory subunit 5
2463.12	1.05111	0.0587908	7.57315e-72	1.01766e-70	ENSMUSG00000028811	107271	Yars	tyrosyl-tRNA synthetase
1253.44	1.26125	0.070654	8.08749e-72	1.08576e-70	ENSMUSG00000020737	15374	Jpt1	Jupiter microtubule associated homolog 1
1435.53	1.15247	0.0645207	8.41809e-72	1.12909e-70	ENSMUSG00000030603	23996	Psmc4	proteasome (prosome, macropain) 26S subunit, ATPase, 4
2247.61	0.87552	0.0489566	9.17409e-72	1.22934e-70	ENSMUSG00000020664	13382	Dld	dihydrolipoamide dehydrogenase
2609.22	0.862003	0.0481997	9.2822e-72	1.24267e-70	ENSMUSG00000022234	12465	Cct5	chaperonin containing Tcp1, subunit 5 (epsilon)
912.015	-1.95163	0.109959	9.93401e-72	1.3287e-70	ENSMUSG00000043154	235542	Ppp2r3a	protein phosphatase 2, regulatory subunit B'', alpha
1801.27	1.01062	0.0565933	1.18984e-71	1.58995e-70	ENSMUSG00000038319	16511	Kcnh2	potassium voltage-gated channel, subfamily H (eag-related), member 2
1971.22	1.36936	0.0768926	1.32884e-71	1.77405e-70	ENSMUSG00000036622	74772	Atp13a2	ATPase type 13A2
465.988	1.30975	0.0736099	2.03299e-71	2.71159e-70	ENSMUSG00000033706	232187	Smyd5	SET and MYND domain containing 5
227.391	-2.47743	0.14001	2.67201e-71	3.56061e-70	ENSMUSG00000009828	56542	Cilk1	ciliogenesis associated kinase 1
20924.9	0.839336	0.0471292	3.64502e-71	4.8527e-70	ENSMUSG00000020458	68585	Rtn4	reticulon 4
521.066	-1.99111	0.112682	3.81981e-71	5.0807e-70	ENSMUSG00000038871	12183	Bpgm	2,3-bisphosphoglycerate mutase
1277.98	-0.994097	0.0558768	4.02595e-71	5.34994e-70	ENSMUSG00000007989	14365	Fzd3	frizzled class receptor 3
746.777	1.27415	0.071747	4.068e-71	5.40081e-70	ENSMUSG00000045980	320534	Tmem104	transmembrane protein 104
4860.49	1.03572	0.058241	4.29417e-71	5.69583e-70	ENSMUSG00000015829	21960	Tnr	tenascin R
5017.81	0.900665	0.0506149	4.3662e-71	5.78602e-70	ENSMUSG00000036707	12283	Cab39	calcium binding protein 39
626.204	1.82227	0.10311	4.77009e-71	6.31543e-70	ENSMUSG00000020235	56371	Fzr1	fizzy and cell division cycle 20 related 1
5519.4	1.35788	0.0766051	6.00687e-71	7.94555e-70	ENSMUSG00000040560	104082	Wdr7	WD repeat domain 7
612.998	-1.4576	0.0823453	7.21605e-71	9.53621e-70	ENSMUSG00000015755	68652	Tab2	TGF-beta activated kinase 1/MAP3K7 binding protein 2
565.42	-1.6957	0.096089	1.00638e-70	1.32873e-69	ENSMUSG00000023912	74011	Slc25a27	solute carrier family 25, member 27
140.31	-3.31461	0.187779	1.14203e-70	1.50645e-69	ENSMUSG00000024027	14652	Glp1r	glucagon-like peptide 1 receptor
618.213	-1.75721	0.099703	1.29935e-70	1.71241e-69	ENSMUSG00000050621	100043813	Rps27rt	ribosomal protein S27, retrogene
320.518	-1.38365	0.0783206	1.61133e-70	2.12161e-69	ENSMUSG00000010290	98404	AI597479	expressed sequence AI597479
123.589	-2.59998	0.147799	1.93912e-70	2.55087e-69	ENSMUSG00000026077	18143	Npas2	neuronal PAS domain protein 2
1034.98	0.917237	0.0517967	1.97261e-70	2.59254e-69	ENSMUSG00000032840	76792	Spring1	SREBF pathway regulator in golgi 1
1622.59	1.91464	0.108915	2.11984e-70	2.7835e-69	ENSMUSG00000034570	170835	Inpp5j	inositol polyphosphate 5-phosphatase J
507.626	-2.93879	0.1669	2.13292e-70	2.79812e-69	ENSMUSG00000028347	230157	Tmeff1	transmembrane protein with EGF-like and two follistatin-like domains 1
4589.94	-0.782386	0.0441743	2.24077e-70	2.93692e-69	ENSMUSG00000034158	320184	Lrrc58	leucine rich repeat containing 58
13009.1	1.33199	0.075446	2.24942e-70	2.94557e-69	ENSMUSG00000029223	22223	Uchl1	ubiquitin carboxy-terminal hydrolase L1
365.367	1.52937	0.087019	5.53262e-70	7.23825e-69	ENSMUSG00000095407	622645	Tmem200c	transmembrane protein 200C
658.105	-1.70655	0.0973155	6.93833e-70	9.06908e-69	ENSMUSG00000024558	225724	Mapk4	mitogen-activated protein kinase 4
252.633	-2.31997	0.132601	7.71709e-70	1.00778e-68	ENSMUSG00000047414	399558	Flrt2	fibronectin leucine rich transmembrane protein 2
189.844	-2.43706	0.139269	8.08868e-70	1.05535e-68	ENSMUSG00000037225	14173	Fgf2	fibroblast growth factor 2
191.644	-2.11072	0.120702	8.75201e-70	1.14086e-68	ENSMUSG00000001156	17119	Mxd1	MAX dimerization protein 1
144.981	1.98101	0.113304	1.02892e-69	1.34002e-68	ENSMUSG00000050737	64292	Ptges	prostaglandin E synthase
437.649	-1.64397	0.0939234	1.45109e-69	1.88812e-68	ENSMUSG00000034761	399510	Map4k5	mitogen-activated protein kinase kinase kinase kinase 5
3881.43	1.2669	0.0721648	1.51565e-69	1.97035e-68	ENSMUSG00000019179	17448	Mdh2	malate dehydrogenase 2, NAD (mitochondrial)
631.83	-1.53133	0.0874232	1.55221e-69	2.01604e-68	ENSMUSG00000039682	66988	Lap3	leucine aminopeptidase 3
992.836	0.866389	0.0492412	1.58512e-69	2.05693e-68	ENSMUSG00000039041	56436	Adrm1	adhesion regulating molecule 1
1016.77	0.822644	0.0467732	1.89495e-69	2.45676e-68	ENSMUSG00000030216	60321	Wbp11	WW domain binding protein 11
1278.61	0.887241	0.0504616	1.91323e-69	2.47822e-68	ENSMUSG00000014763	67544	Fam120b	family with sequence similarity 120, member B
636.63	-1.40883	0.0804535	2.34232e-69	3.0313e-68	ENSMUSG00000018470	16499	Kcnab3	potassium voltage-gated channel, shaker-related subfamily, beta member 3
579.131	-2.9138	0.166842	2.61063e-69	3.37549e-68	ENSMUSG00000022723	224273	Crybg3	beta-gamma crystallin domain containing 3
586.598	1.08267	0.0617152	2.78746e-69	3.60089e-68	ENSMUSG00000002799	16450	Jag2	jagged 2
862.382	0.923671	0.0526238	3.08783e-69	3.98532e-68	ENSMUSG00000034563	72278	Ccpg1	cell cycle progression 1
1460.55	1.25537	0.071672	3.15399e-69	4.06706e-68	ENSMUSG00000074968	228432	Ano3	anoctamin 3
1157.26	-1.93918	0.111299	3.15925e-69	4.07019e-68	ENSMUSG00000024978	14732	Gpam	glycerol-3-phosphate acyltransferase, mitochondrial
5174.72	0.977297	0.0557543	4.31133e-69	5.54949e-68	ENSMUSG00000020114	71902	Cand1	cullin associated and neddylation disassociated 1
4313.27	1.03806	0.0592593	4.75707e-69	6.11775e-68	ENSMUSG00000061032	18114	Rrp1	ribosomal RNA processing 1
1496.27	1.25699	0.0718808	5.1786e-69	6.6539e-68	ENSMUSG00000030284	171508	Creld1	cysteine-rich with EGF-like domains 1
1165.94	-2.50218	0.143867	5.62884e-69	7.22594e-68	ENSMUSG00000071176	234094	Arhgef10	Rho guanine nucleotide exchange factor (GEF) 10
1402.66	1.45169	0.0831812	5.89868e-69	7.56559e-68	ENSMUSG00000048490	268903	Nrip1	nuclear receptor interacting protein 1
827.712	1.00738	0.0575969	8.05601e-69	1.03233e-67	ENSMUSG00000027774	28030	Gfm1	G elongation factor, mitochondrial 1
573.574	2.47247	0.142364	8.42008e-69	1.07803e-67	ENSMUSG00000047821	94092	Trim16	tripartite motif-containing 16
1250.48	1.25866	0.0721154	9.30242e-69	1.18993e-67	ENSMUSG00000045114	69017	Prrt2	proline-rich transmembrane protein 2
326.419	-1.51946	0.0873422	1.30344e-68	1.66583e-67	ENSMUSG00000055493	13853	Epm2a	epilepsy, progressive myoclonic epilepsy, type 2 gene alpha
486.266	-1.23756	0.0709824	1.35251e-68	1.72701e-67	ENSMUSG00000036943	235442	Rab8b	RAB8B, member RAS oncogene family
1827.29	0.792281	0.0454031	2.22558e-68	2.8393e-67	ENSMUSG00000037260	52120	Hgsnat	heparan-alpha-glucosaminide N-acetyltransferase
579.31	1.44583	0.0832047	2.23438e-68	2.84799e-67	ENSMUSG00000085795	353310	Zfp703	zinc finger protein 703
433.616	-1.23406	0.0708991	2.26158e-68	2.88011e-67	ENSMUSG00000027466	24105	Rbck1	RanBP-type and C3HC4-type zinc finger containing 1
1012.41	0.724467	0.0415197	2.45385e-68	3.12219e-67	ENSMUSG00000040151	23908	Hs2st1	heparan sulfate 2-O-sulfotransferase 1
2225.68	1.06619	0.0612439	3.01699e-68	3.83531e-67	ENSMUSG00000038039	70297	Gcc2	GRIP and coiled-coil domain containing 2
6262.99	0.697982	0.0400372	3.30626e-68	4.19933e-67	ENSMUSG00000015291	14567	Gdi1	guanosine diphosphate (GDP) dissociation inhibitor 1
1002.39	1.14841	0.0660878	4.49062e-68	5.69856e-67	ENSMUSG00000006276	13859	Eps15l1	epidermal growth factor receptor pathway substrate 15-like 1
1554.83	1.11525	0.0642031	5.36372e-68	6.80052e-67	ENSMUSG00000038991	105245	Txndc5	thioredoxin domain containing 5
2681.83	-1.19534	0.0688518	5.37399e-68	6.80752e-67	ENSMUSG00000026737	18718	Pip4k2a	phosphatidylinositol-5-phosphate 4-kinase, type II, alpha
1593.77	1.02845	0.0591847	5.63658e-68	7.13387e-67	ENSMUSG00000021536	210044	Adcy2	adenylate cyclase 2
1233.4	1.16918	0.0674054	7.45158e-68	9.42271e-67	ENSMUSG00000027889	109674	Ampd2	adenosine monophosphate deaminase 2
426.88	-1.38327	0.0798824	7.51882e-68	9.49938e-67	ENSMUSG00000052144	232314	Ppp4r2	protein phosphatase 4, regulatory subunit 2
696.701	-1.45773	0.0842491	7.87533e-68	9.94105e-67	ENSMUSG00000034663	140780	Bmp2k	BMP2 inducible kinase
301.074	-2.02763	0.117686	8.28429e-68	1.04481e-66	ENSMUSG00000020362	104625	Cnot6	CCR4-NOT transcription complex, subunit 6
702.857	-0.93529	0.0539012	1.01335e-67	1.27691e-66	ENSMUSG00000036879	102093	Phkb	phosphorylase kinase beta
589.134	-3.46101	0.200523	1.04659e-67	1.31764e-66	ENSMUSG00000068748	19283	Ptprz1	protein tyrosine phosphatase, receptor type Z, polypeptide 1
1129.56	0.743936	0.0428541	1.13715e-67	1.4304e-66	ENSMUSG00000003235	224045	Eif2b5	eukaryotic translation initiation factor 2B, subunit 5 epsilon
301.053	-3.81006	0.220996	1.15066e-67	1.44612e-66	ENSMUSG00000032220	71602	Myo1e	myosin IE
3200.41	1.0127	0.0584163	1.18166e-67	1.48379e-66	ENSMUSG00000032625	330267	Thsd7a	thrombospondin, type I, domain containing 7A
139.635	-3.48429	0.202104	1.45826e-67	1.82792e-66	ENSMUSG00000042686	57339	Jph1	junctophilin 1
335.17	-3.86469	0.224383	1.45802e-67	1.82792e-66	ENSMUSG00000052911	16779	Lamb2	laminin, beta 2
257.572	-1.69383	0.0983005	1.46771e-67	1.83816e-66	ENSMUSG00000042903	54601	Foxo4	forkhead box O4
1790.43	-4.62801	0.269717	1.75972e-67	2.20195e-66	ENSMUSG00000032281	94180	Acsbg1	acyl-CoA synthetase bubblegum family member 1
556.878	1.09506	0.0632948	1.87297e-67	2.34163e-66	ENSMUSG00000031787	74187	Katnb1	katanin p80 (WD40-containing) subunit B 1
374.295	1.39354	0.0807344	1.92069e-67	2.39919e-66	ENSMUSG00000034105	74347	Meak7	MTOR associated protein , eak-7 homolog
1572.69	-4.54066	0.264628	1.98975e-67	2.4833e-66	ENSMUSG00000026879	227753	Gsn	gelsolin
130.469	-2.66394	0.155064	2.76014e-67	3.44179e-66	ENSMUSG00000041075	14369	Fzd7	frizzled class receptor 7
1245.03	0.902345	0.0521709	2.81592e-67	3.5083e-66	ENSMUSG00000024270	106957	Slc39a6	solute carrier family 39 (metal ion transporter), member 6
276.832	1.78135	0.103684	2.86444e-67	3.56565e-66	ENSMUSG00000054034	331532	Tceal5	transcription elongation factor A (SII)-like 5
313.692	-4.34634	0.253567	3.49549e-67	4.34742e-66	ENSMUSG00000026697	17926	Myoc	myocilin
10739.9	0.85732	0.0496059	3.77923e-67	4.69625e-66	ENSMUSG00000046480	399548	Scn4b	sodium channel, type IV, beta
295.267	-1.24332	0.0721217	4.00686e-67	4.97481e-66	ENSMUSG00000032705	97827	Exd2	exonuclease 3'-5' domain containing 2
9136.49	0.954268	0.0552706	4.42476e-67	5.48892e-66	ENSMUSG00000008153	232370	Clstn3	calsyntenin 3
865.881	1.17264	0.0680298	4.84392e-67	6.0037e-66	ENSMUSG00000006711	210108	D130043K22Rik	RIKEN cDNA D130043K22 gene
1162.01	0.806543	0.0466985	4.91041e-67	6.08086e-66	ENSMUSG00000010517	14084	Faf1	Fas-associated factor 1
214.941	2.23038	0.130342	5.8348e-67	7.21937e-66	ENSMUSG00000040734	333654	Ppp1r13l	protein phosphatase 1, regulatory subunit 13 like
136.019	2.57285	0.150209	5.91654e-67	7.31421e-66	ENSMUSG00000038242	71872	Aox4	aldehyde oxidase 4
185.99	-4.13354	0.241377	5.97103e-67	7.37522e-66	ENSMUSG00000051041	244198	Olfml1	olfactomedin-like 1
2168.43	-4.96911	0.291426	6.68667e-67	8.25207e-66	ENSMUSG00000026424	171469	Gpr37l1	G protein-coupled receptor 37-like 1
149.95	-4.80462	0.281574	6.99524e-67	8.62546e-66	ENSMUSG00000033192	270084	Lpcat2	lysophosphatidylcholine acyltransferase 2
342.532	-1.32657	0.0772154	9.15056e-67	1.12734e-65	ENSMUSG00000050199	107515	Lgr4	leucine-rich repeat-containing G protein-coupled receptor 4
8468.77	0.94384	0.0548244	1.0624e-66	1.30775e-65	ENSMUSG00000039262	227723	Prrc2b	proline-rich coiled-coil 2B
1094.26	-1.08046	0.0628345	1.19637e-66	1.47139e-65	ENSMUSG00000032537	270190	Ephb1	Eph receptor B1
1084.9	-1.48213	0.0865706	1.71417e-66	2.10642e-65	ENSMUSG00000032340	18007	Neo1	neogenin
1009.97	0.997787	0.0581625	2.76659e-66	3.39676e-65	ENSMUSG00000026869	66998	Psmd5	proteasome (prosome, macropain) 26S subunit, non-ATPase, 5
1625.78	2.85646	0.16749	2.97502e-66	3.64954e-65	ENSMUSG00000031386	15161	Hcfc1	host cell factor C1
153.694	-2.55305	0.149919	3.14552e-66	3.85541e-65	ENSMUSG00000042793	329252	Lgr6	leucine-rich repeat-containing G protein-coupled receptor 6
1315.01	-1.07508	0.0627369	3.33781e-66	4.08761e-65	ENSMUSG00000079215	269704	Zfp664	zinc finger protein 664
90.362	-4.23085	0.248681	3.59452e-66	4.39823e-65	ENSMUSG00000096014	20664	Sox1	SRY (sex determining region Y)-box 1
189.718	-3.88307	0.228094	4.41698e-66	5.4e-65	ENSMUSG00000035413	103743	Tmem98	transmembrane protein 98
765.306	1.63557	0.0959781	4.46847e-66	5.4583e-65	ENSMUSG00000006676	71472	Usp19	ubiquitin specific peptidase 19
324.581	-3.17071	0.186195	5.67996e-66	6.93226e-65	ENSMUSG00000026437	18557	Cdk18	cyclin-dependent kinase 18
322.985	2.74742	0.161538	5.82864e-66	7.10767e-65	ENSMUSG00000085925	353326	Rtl1	retrotransposon Gaglike 1
1339.58	-3.12048	0.183381	6.92838e-66	8.44157e-65	ENSMUSG00000030168	68465	Adipor2	adiponectin receptor 2
1038.37	0.718936	0.0420044	7.94849e-66	9.67628e-65	ENSMUSG00000035297	26891	Cops4	COP9 signalosome subunit 4
8216.01	0.863427	0.0504824	8.23348e-66	1.00147e-64	ENSMUSG00000039218	75956	Srrm2	serine/arginine repetitive matrix 2
20265.4	1.16632	0.0683135	8.27102e-66	1.00519e-64	ENSMUSG00000019505	22187	Ubb	ubiquitin B
238.437	2.2003	0.129869	1.04866e-65	1.27337e-64	ENSMUSG00000055069	270160	Rab39	RAB39, member RAS oncogene family
544.582	-1.21758	0.0714177	1.12386e-65	1.36354e-64	ENSMUSG00000027366	66552	Sppl2a	signal peptide peptidase like 2A
1628.81	1.12467	0.0659254	1.13036e-65	1.37027e-64	ENSMUSG00000075033	385658	Nxpe3	neurexophilin and PC-esterase domain family, member 3
166.214	-4.00417	0.236133	1.21452e-65	1.47104e-64	ENSMUSG00000015839	18024	Nfe2l2	nuclear factor, erythroid derived 2, like 2
1219.82	1.44457	0.0849182	1.22804e-65	1.48616e-64	ENSMUSG00000029502	269682	Golga3	golgi autoantigen, golgin subfamily a, 3
1165.89	1.32756	0.0779824	1.33299e-65	1.61182e-64	ENSMUSG00000020436	14406	Gabrg2	gamma-aminobutyric acid (GABA) A receptor, subunit gamma 2
622.417	-1.65018	0.0972522	1.49437e-65	1.80544e-64	ENSMUSG00000027852	18176	Nras	neuroblastoma ras oncogene
767.834	-1.1205	0.0657572	1.59959e-65	1.93093e-64	ENSMUSG00000037826	243382	Ppm1k	protein phosphatase 1K (PP2C domain containing)
917.397	1.10505	0.0648687	1.78896e-65	2.15772e-64	ENSMUSG00000039478	78506	Micu3	mitochondrial calcium uptake family, member 3
938.004	1.37616	0.0809551	1.80496e-65	2.17518e-64	ENSMUSG00000034402	238271	Kcnh5	potassium voltage-gated channel, subfamily H (eag-related), member 5
1520.55	0.703607	0.0412341	1.97104e-65	2.37334e-64	ENSMUSG00000036323	66661	Srp72	signal recognition particle 72
110.266	-3.46086	0.204234	2.29489e-65	2.76098e-64	ENSMUSG00000033965	20502	Slc16a2	solute carrier family 16 (monocarboxylic acid transporters), member 2
530.054	1.42519	0.0839456	2.29833e-65	2.76281e-64	ENSMUSG00000050138	210741	Kcnk12	potassium channel, subfamily K, member 12
338.518	-2.17484	0.128721	2.3151e-65	2.78063e-64	ENSMUSG00000078532	67149	Nkain1	Na+/K+ transporting ATPase interacting 1
1011.91	1.24203	0.0730838	2.68173e-65	3.2183e-64	ENSMUSG00000028577	18786	Plaa	phospholipase A2, activating protein
175.161	-5.15327	0.306559	2.91334e-65	3.49333e-64	ENSMUSG00000022132	58187	Cldn10	claudin 10
252.408	1.5012	0.0886232	3.61728e-65	4.3338e-64	ENSMUSG00000033222	74044	Ttf2	transcription termination factor, RNA polymerase II
412.933	-1.24344	0.0732697	4.01845e-65	4.81042e-64	ENSMUSG00000027854	66641	Sike1	suppressor of IKBKE 1
373.906	-2.71552	0.160792	4.27253e-65	5.11032e-64	ENSMUSG00000022112	103978	Gpc5	glypican 5
1831.51	0.716906	0.0421277	4.28618e-65	5.12238e-64	ENSMUSG00000001783	28088	Rtcb	RNA 2',3'-cyclic phosphate and 5'-OH ligase
260.157	-2.46975	0.146413	4.40971e-65	5.26563e-64	ENSMUSG00000038024	329877	Dennd4c	DENN/MADD domain containing 4C
2328.93	0.974252	0.0573495	5.03985e-65	6.01307e-64	ENSMUSG00000024120	72416	Lrpprc	leucine-rich PPR-motif containing
147.075	-4.84442	0.288358	5.77528e-65	6.8848e-64	ENSMUSG00000027962	22329	Vcam1	vascular cell adhesion molecule 1
764.013	-1.4128	0.0834753	5.8158e-65	6.92736e-64	ENSMUSG00000031453	19414	Rasa3	RAS p21 protein activator 3
258.205	-3.21679	0.190504	6.56608e-65	7.81456e-64	ENSMUSG00000047216	227485	Cdh19	cadherin 19, type 2
2261.87	0.918796	0.0541447	7.55018e-65	8.97834e-64	ENSMUSG00000035325	69162	Sec31a	Sec31 homolog A (S. cerevisiae)
256.277	-2.92536	0.17347	8.15758e-65	9.68669e-64	ENSMUSG00000045817	12193	Zfp36l2	zinc finger protein 36, C3H type-like 2
867.641	-1.0074	0.0594108	8.15934e-65	9.68669e-64	ENSMUSG00000061787	20068	Rps17	ribosomal protein S17
2822.07	-0.806433	0.0475307	9.21246e-65	1.09279e-63	ENSMUSG00000042182	320705	Bend6	BEN domain containing 6
303.904	-3.44107	0.204068	9.48302e-65	1.12396e-63	ENSMUSG00000028655	76574	Mfsd2a	major facilitator superfamily domain containing 2A
615.219	1.18573	0.0700647	1.01959e-64	1.20745e-63	ENSMUSG00000057766	225187	Ankrd29	ankyrin repeat domain 29
153.206	2.79065	0.165697	1.02632e-64	1.21443e-63	ENSMUSG00000046215	104582	Rprml	reprimo-like
1127.9	0.876001	0.0516831	1.12476e-64	1.32981e-63	ENSMUSG00000035232	236900	Pdk3	pyruvate dehydrogenase kinase, isoenzyme 3
2070.36	0.849451	0.0501351	1.29627e-64	1.53006e-63	ENSMUSG00000039414	320473	Heatr5b	HEAT repeat containing 5B
547.429	-4.02756	0.239508	1.29581e-64	1.53006e-63	ENSMUSG00000052229	574402	Gpr17	G protein-coupled receptor 17
1716.6	0.772345	0.0456093	1.67177e-64	1.97167e-63	ENSMUSG00000029763	20336	Exoc4	exocyst complex component 4
120.189	-3.20182	0.190451	2.2822e-64	2.6894e-63	ENSMUSG00000029826	78781	Zc3hav1	zinc finger CCCH type, antiviral 1
961.982	0.729548	0.043139	2.56417e-64	3.01921e-63	ENSMUSG00000019777	15182	Hdac2	histone deacetylase 2
1053.16	1.0767	0.0639103	4.61455e-64	5.429e-63	ENSMUSG00000038028	319801	Tigar	Trp53 induced glycolysis regulatory phosphatase
267.054	3.06538	0.182922	5.37938e-64	6.32363e-63	ENSMUSG00000029491	18587	Pde6b	phosphodiesterase 6B, cGMP, rod receptor, beta polypeptide
8230.31	1.18634	0.0705245	5.69883e-64	6.69367e-63	ENSMUSG00000064329	20265	Scn1a	sodium channel, voltage-gated, type I, alpha
5055.28	-0.958702	0.0569116	5.80739e-64	6.81562e-63	ENSMUSG00000094483	19291	Purb	purine rich element binding protein B
387.123	1.49237	0.088966	5.98547e-64	7.01888e-63	ENSMUSG00000030309	232560	Caprin2	caprin family member 2
1323.82	0.725313	0.0430763	8.97881e-64	1.05204e-62	ENSMUSG00000025417	117150	Pip4k2c	phosphatidylinositol-5-phosphate 4-kinase, type II, gamma
10803.3	-5.49133	0.331641	9.75858e-64	1.14248e-62	ENSMUSG00000032554	22041	Trf	transferrin
357.72	-1.50076	0.0896403	1.01337e-63	1.18543e-62	ENSMUSG00000016946	69259	Kctd5	potassium channel tetramerisation domain containing 5
369.395	2.114	0.126803	1.02781e-63	1.20134e-62	ENSMUSG00000029088	80334	Kcnip4	Kv channel interacting protein 4
3467.46	0.509848	0.0302752	1.0391e-63	1.21355e-62	ENSMUSG00000047187	59021	Rab2a	RAB2A, member RAS oncogene family
1670.14	0.724883	0.0430969	1.21805e-63	1.42139e-62	ENSMUSG00000014349	268470	Ube2z	ubiquitin-conjugating enzyme E2Z
3655.46	1.02974	0.0613399	1.37445e-63	1.60259e-62	ENSMUSG00000030738	56347	Eif3c	eukaryotic translation initiation factor 3, subunit C
688.788	1.01551	0.060526	1.64853e-63	1.92061e-62	ENSMUSG00000031634	192169	Ufsp2	UFM1-specific peptidase 2
1241.42	1.02075	0.0608901	2.07873e-63	2.41985e-62	ENSMUSG00000032020	72828	Ubash3b	ubiquitin associated and SH3 domain containing, B
227.657	-3.26219	0.195608	2.20188e-63	2.56113e-62	ENSMUSG00000030237	28250	Slco1a4	solute carrier organic anion transporter family, member 1a4
1206.1	0.75684	0.0451059	2.3332e-63	2.71169e-62	ENSMUSG00000020949	30795	Fkbp3	FK506 binding protein 3
1806.12	0.678838	0.040447	2.36074e-63	2.74148e-62	ENSMUSG00000041058	107568	Wwp1	WW domain containing E3 ubiquitin protein ligase 1
679.845	-2.94936	0.177021	2.51183e-63	2.91458e-62	ENSMUSG00000026678	19737	Rgs5	regulator of G-protein signaling 5
1112.83	-2.80338	0.168471	3.08585e-63	3.57774e-62	ENSMUSG00000027674	58869	Pex5l	peroxisomal biogenesis factor 5-like
123.708	-2.57441	0.15506	4.32875e-63	5.01471e-62	ENSMUSG00000101174	15436	Hoxd4	homeobox D4
1698.55	0.954129	0.0570475	4.43584e-63	5.13464e-62	ENSMUSG00000038116	228829	Phf20	PHD finger protein 20
1672.33	0.812536	0.0485818	5.41765e-63	6.26607e-62	ENSMUSG00000039840	100502841	Epg5	ectopic P-granules autophagy protein 5 homolog (C. elegans)
488.409	0.911907	0.0545645	5.85223e-63	6.76326e-62	ENSMUSG00000030079	56505	Ruvbl1	RuvB-like protein 1
416.909	-2.70503	0.163024	6.02819e-63	6.96101e-62	ENSMUSG00000045034	218440	Ankrd34b	ankyrin repeat domain 34B
536.885	-1.88373	0.113609	6.04335e-63	6.97291e-62	ENSMUSG00000001280	20683	Sp1	trans-acting transcription factor 1
2339.4	0.971903	0.0582388	8.00952e-63	9.23409e-62	ENSMUSG00000002812	14248	Flii	flightless I actin binding protein
145.015	-5.15915	0.313196	8.0552e-63	9.2793e-62	ENSMUSG00000001864	108897	Aif1l	allograft inflammatory factor 1-like
1891.76	0.915254	0.0548665	9.78868e-63	1.12672e-61	ENSMUSG00000031701	56445	Dnaja2	DnaJ heat shock protein family (Hsp40) member A2
889.539	-1.46719	0.0884023	1.2587e-62	1.44766e-61	ENSMUSG00000026478	226519	Lamc1	laminin, gamma 1
334.614	-4.1601	0.251652	1.30351e-62	1.49799e-61	ENSMUSG00000038173	320981	Enpp6	ectonucleotide pyrophosphatase/phosphodiesterase 6
692.999	0.909379	0.0546037	1.55883e-62	1.78998e-61	ENSMUSG00000029175	74919	Slc35f6	solute carrier family 35, member F6
92.0975	-3.1688	0.191377	1.58316e-62	1.81646e-61	ENSMUSG00000090035	14426	Galnt4	polypeptide N-acetylgalactosaminyltransferase 4
171.564	-3.97663	0.240759	2.02919e-62	2.32636e-61	ENSMUSG00000048058	241576	Ldlrad3	low density lipoprotein receptor class A domain containing 3
1795.1	-1.04924	0.0632141	3.16191e-62	3.62207e-61	ENSMUSG00000024143	104215	Rhoq	ras homolog family member Q
2541.62	0.728187	0.0438012	3.20107e-62	3.66401e-61	ENSMUSG00000022982	20655	Sod1	superoxide dismutase 1, soluble
646.065	1.16898	0.0704952	3.25987e-62	3.72835e-61	ENSMUSG00000036686	212139	Cc2d1a	coiled-coil and C2 domain containing 1A
1072.46	0.989142	0.059631	4.17287e-62	4.76876e-61	ENSMUSG00000035354	78610	Uvrag	UV radiation resistance associated gene
223.54	-1.8589	0.113013	5.65561e-62	6.4581e-61	ENSMUSG00000004880	98386	Lbr	lamin B receptor
3391.62	0.651341	0.0393069	8.52599e-62	9.72802e-61	ENSMUSG00000039202	54608	Abhd2	abhydrolase domain containing 2
213.627	-3.9246	0.239135	1.22191e-61	1.39307e-60	ENSMUSG00000030255	16651	Sspn	sarcospan
1067.11	0.964636	0.0583825	1.27887e-61	1.45685e-60	ENSMUSG00000041781	51786	Cpsf2	cleavage and polyadenylation specific factor 2
653.669	-1.09517	0.0663529	1.36198e-61	1.5503e-60	ENSMUSG00000046096	233812	Mosmo	modulator of smoothened
118.178	-3.41536	0.207943	1.42984e-61	1.62626e-60	ENSMUSG00000022899	57738	Slc15a2	solute carrier family 15 (H+/peptide transporter), member 2
497.511	-3.73948	0.227873	1.48568e-61	1.68843e-60	ENSMUSG00000045087	94226	S1pr5	sphingosine-1-phosphate receptor 5
1730.28	1.47014	0.0894025	1.56833e-61	1.78095e-60	ENSMUSG00000029168	65254	Dpysl5	dihydropyrimidinase-like 5
356.98	1.09614	0.0664573	1.6384e-61	1.85906e-60	ENSMUSG00000028893	230784	Sesn2	sestrin 2
1125.25	1.15242	0.0699076	1.70099e-61	1.92855e-60	ENSMUSG00000041303	98488	Gtf3c3	general transcription factor IIIC, polypeptide 3
2443.2	1.40471	0.0854007	1.72844e-61	1.95813e-60	ENSMUSG00000052684	16476	Jun	jun proto-oncogene
659.895	0.90303	0.0546991	1.75999e-61	1.9923e-60	ENSMUSG00000046841	216197	Ckap4	cytoskeleton-associated protein 4
1698.18	0.802349	0.0485989	1.99544e-61	2.25705e-60	ENSMUSG00000033781	142688	Asb13	ankyrin repeat and SOCS box-containing 13
1488.09	0.884715	0.053641	2.34674e-61	2.65231e-60	ENSMUSG00000018040	74778	Rrp7a	ribosomal RNA processing 7 homolog A
825.79	1.91878	0.117316	2.35661e-61	2.66137e-60	ENSMUSG00000051375	75599	Pcdh1	protocadherin 1
211.386	-3.62994	0.221512	2.37013e-61	2.67455e-60	ENSMUSG00000041577	116847	Prelp	proline arginine-rich end leucine-rich repeat
1276.53	0.617217	0.0373854	2.42459e-61	2.73385e-60	ENSMUSG00000016831	268741	Tox4	TOX high mobility group box family member 4
2959.31	1.05918	0.0643135	2.64552e-61	2.98062e-60	ENSMUSG00000027419	18549	Pcsk2	proprotein convertase subtilisin/kexin type 2
436.242	-1.18874	0.0722501	2.66839e-61	3.00403e-60	ENSMUSG00000051469	59057	Zfp24	zinc finger protein 24
117.661	-3.5612	0.217501	3.10896e-61	3.49727e-60	ENSMUSG00000055415	319767	Atp10b	ATPase, class V, type 10B
996.554	1.64717	0.100675	3.84862e-61	4.32593e-60	ENSMUSG00000034675	56320	Dbn1	drebrin 1
118.848	-4.34839	0.266591	3.87875e-61	4.35639e-60	ENSMUSG00000048163	20345	Selplg	selectin, platelet (p-selectin) ligand
2721.05	0.938862	0.0570478	3.91745e-61	4.39642e-60	ENSMUSG00000020741	74148	Cluh	clustered mitochondria (cluA/CLU1) homolog
296.755	1.12031	0.0681662	4.13483e-61	4.63676e-60	ENSMUSG00000030083	80283	Abtb1	ankyrin repeat and BTB (POZ) domain containing 1
492.088	-1.78935	0.109634	5.29407e-61	5.93208e-60	ENSMUSG00000036560	243914	Lgi4	leucine-rich repeat LGI family, member 4
1331.4	0.857385	0.0521416	5.55613e-61	6.22088e-60	ENSMUSG00000029250	231329	Polr2b	polymerase (RNA) II (DNA directed) polypeptide B
2743.06	-1.99758	0.122628	6.23948e-61	6.98054e-60	ENSMUSG00000045136	73710	Tubb2b	tubulin, beta 2B class IIB
91.2944	-4.18651	0.25699	6.64042e-61	7.42332e-60	ENSMUSG00000041660	170442	Bbox1	butyrobetaine (gamma), 2-oxoglutarate dioxygenase 1 (gamma-butyrobetaine hydroxylase)
877.914	1.03933	0.0633216	6.86057e-61	7.66346e-60	ENSMUSG00000020516	72508	Rps6kb1	ribosomal protein S6 kinase, polypeptide 1
22415	0.85238	0.0519086	8.12038e-61	9.06366e-60	ENSMUSG00000033615	12889	Cplx1	complexin 1
564.117	1.28727	0.0786475	8.74347e-61	9.75155e-60	ENSMUSG00000042487	235497	Leo1	Leo1, Paf1/RNA polymerase II complex component
1080.63	1.01066	0.0616247	8.96433e-61	9.99012e-60	ENSMUSG00000024502	76217	Jakmip2	janus kinase and microtubule interacting protein 2
333.03	1.74013	0.1068	9.31771e-61	1.03759e-59	ENSMUSG00000025576	52897	Rbfox3	RNA binding protein, fox-1 homolog (C. elegans) 3
122.827	-2.93667	0.18016	9.66606e-61	1.07555e-59	ENSMUSG00000032224	76886	Fam81a	family with sequence similarity 81, member A
1751.67	0.671848	0.0409174	1.01961e-60	1.13365e-59	ENSMUSG00000042599	338523	Kdm7a	lysine (K)-specific demethylase 7A
896.201	0.848105	0.0516995	1.06783e-60	1.18542e-59	ENSMUSG00000033578	67564	Tmem35a	transmembrane protein 35A
253.164	-1.99048	0.122436	1.06764e-60	1.18542e-59	ENSMUSG00000034614	216505	Pik3ip1	phosphoinositide-3-kinase interacting protein 1
2329.7	-0.727289	0.0443242	1.15779e-60	1.2843e-59	ENSMUSG00000066324	242291	Bpnt2	3'(2'), 5'-bisphosphate nucleotidase 2
91.773	-3.46577	0.212859	1.45366e-60	1.61125e-59	ENSMUSG00000030898	12426	Cckbr	cholecystokinin B receptor
3149.14	0.83525	0.0509895	1.60374e-60	1.77623e-59	ENSMUSG00000065954	320165	Tacc1	transforming, acidic coiled-coil containing protein 1
233.638	-1.73347	0.10661	1.6352e-60	1.80968e-59	ENSMUSG00000001521	22158	Tulp3	tubby-like protein 3
1006.66	1.2616	0.0772546	1.70728e-60	1.888e-59	ENSMUSG00000019590	13056	Cyb561	cytochrome b-561
2354.68	-1.14555	0.0700931	1.7791e-60	1.96591e-59	ENSMUSG00000026991	227937	Pkp4	plakophilin 4
957.326	1.45141	0.089117	2.19002e-60	2.41812e-59	ENSMUSG00000020111	216001	Micu1	mitochondrial calcium uptake 1
610.933	-0.986175	0.0603422	2.39085e-60	2.63783e-59	ENSMUSG00000066568	67070	Lsm14a	LSM14A mRNA processing body assembly factor
4349.33	1.08507	0.0664394	2.41884e-60	2.66666e-59	ENSMUSG00000038324	56407	Trpc4ap	transient receptor potential cation channel, subfamily C, member 4 associated protein
1154.8	-2.5921	0.159935	2.9728e-60	3.27487e-59	ENSMUSG00000074794	105171	Arrdc3	arrestin domain containing 3
149.432	-1.928	0.119136	3.88243e-60	4.27364e-59	ENSMUSG00000018931	24083	Natd1	N-acetyltransferase domain containing 1
257.504	-1.79884	0.1112	5.48157e-60	6.02931e-59	ENSMUSG00000054256	17690	Msi1	musashi RNA-binding protein 1
517.762	-1.20933	0.0743914	6.45567e-60	7.09531e-59	ENSMUSG00000038648	208647	Creb3l2	cAMP responsive element binding protein 3-like 2
671.547	0.884661	0.0543636	8.77263e-60	9.63446e-59	ENSMUSG00000018659	103711	Pnpo	pyridoxine 5'-phosphate oxidase
2233.23	-0.700329	0.0430103	9.35063e-60	1.02614e-58	ENSMUSG00000024695	109910	Zfp91	zinc finger protein 91
1578.75	0.899466	0.055323	1.09022e-59	1.1955e-58	ENSMUSG00000058355	24015	Abce1	ATP-binding cassette, sub-family E (OABP), member 1
208.076	-3.25524	0.201438	1.10028e-59	1.20561e-58	ENSMUSG00000027339	215653	Rassf2	Ras association (RalGDS/AF-6) domain family member 2
940.282	-0.879225	0.0540804	1.13461e-59	1.24227e-58	ENSMUSG00000004798	29869	Ulk2	unc-51 like kinase 2
108.453	1.91436	0.118795	1.20207e-59	1.31513e-58	ENSMUSG00000074345	244882	Tnfaip8l3	tumor necrosis factor, alpha-induced protein 8-like 3
327.871	-2.1521	0.133669	1.22532e-59	1.33955e-58	ENSMUSG00000034998	14236	Foxn2	forkhead box N2
3834.62	1.01955	0.0627818	1.2277e-59	1.34113e-58	ENSMUSG00000048814	381338	Lonrf2	LON peptidase N-terminal domain and ring finger 2
341.246	-3.75373	0.233015	1.99098e-59	2.17328e-58	ENSMUSG00000061353	20315	Cxcl12	chemokine (C-X-C motif) ligand 12
121.407	-3.37225	0.209193	2.07242e-59	2.26047e-58	ENSMUSG00000041134	224405	Cyyr1	cysteine and tyrosine-rich protein 1
325.684	1.30486	0.0807403	2.43579e-59	2.65479e-58	ENSMUSG00000021255	26380	Esrrb	estrogen related receptor, beta
5128.45	0.775903	0.0478461	2.53173e-59	2.75726e-58	ENSMUSG00000001440	16211	Kpnb1	karyopherin (importin) beta 1
10846.3	1.00925	0.0623699	3.20115e-59	3.48368e-58	ENSMUSG00000022037	12759	Clu	clusterin
826.934	0.818029	0.0505213	3.60541e-59	3.92065e-58	ENSMUSG00000027804	67738	Ppid	peptidylprolyl isomerase D (cyclophilin D)
413.384	-2.60164	0.162127	4.02872e-59	4.37766e-58	ENSMUSG00000042116	246228	Vwa1	von Willebrand factor A domain containing 1
13504.9	0.607953	0.0375621	5.00065e-59	5.42966e-58	ENSMUSG00000030806	56216	Stx1b	syntaxin 1B
2402.34	0.543159	0.0336024	7.407e-59	8.03637e-58	ENSMUSG00000074781	93765	Ube2n	ubiquitin-conjugating enzyme E2N
1893.82	-1.34208	0.0834266	7.41528e-59	8.03928e-58	ENSMUSG00000036503	24017	Rnf13	ring finger protein 13
5572.14	1.02702	0.0637325	9.22571e-59	9.99452e-58	ENSMUSG00000039953	65945	Clstn1	calsyntenin 1
911.668	1.27349	0.0792152	1.03612e-58	1.12161e-57	ENSMUSG00000010154	234857	Spire2	spire type actin nucleation factor 2
394.011	-1.43596	0.0894899	1.13057e-58	1.22294e-57	ENSMUSG00000052544	20447	St6galnac3	ST6 (alpha-N-acetyl-neuraminyl-2,3-beta-galactosyl-1,3)-N-acetylgalactosaminide alpha-2,6-sialyltransferase 3
599.59	1.32921	0.0827551	1.1436e-58	1.2361e-57	ENSMUSG00000027615	12807	Hps3	HPS3, biogenesis of lysosomal organelles complex 2 subunit 1
619.774	1.16271	0.0723272	1.3349e-58	1.4418e-57	ENSMUSG00000021311	238505	Mtr	5-methyltetrahydrofolate-homocysteine methyltransferase
2669.56	0.667083	0.0414054	1.57868e-58	1.70381e-57	ENSMUSG00000029840	14489	Mtpn	myotrophin
506.912	1.31079	0.0817025	1.6111e-58	1.7375e-57	ENSMUSG00000034255	544817	Arhgap27	Rho GTPase activating protein 27
1259.92	-1.51966	0.0949183	1.61436e-58	1.7397e-57	ENSMUSG00000039960	69581	Rhou	ras homolog family member U
881.207	-1.03334	0.0642754	1.67931e-58	1.80834e-57	ENSMUSG00000006373	53328	Pgrmc1	progesterone receptor membrane component 1
5581.82	1.95796	0.122853	1.95925e-58	2.10821e-57	ENSMUSG00000051790	216856	Nlgn2	neuroligin 2
317.212	-3.59777	0.225259	2.05433e-58	2.20886e-57	ENSMUSG00000002274	70083	Metrn	meteorin, glial cell differentiation regulator
1659.12	0.952662	0.0593307	2.65001e-58	2.84722e-57	ENSMUSG00000042750	12069	Bex2	brain expressed X-linked 2
836.503	0.899629	0.0560119	2.66424e-58	2.86038e-57	ENSMUSG00000031309	110651	Rps6ka3	ribosomal protein S6 kinase polypeptide 3
788.788	-1.16889	0.0729109	2.6761e-58	2.87097e-57	ENSMUSG00000017485	21974	Top2b	topoisomerase (DNA) II beta
208.103	-2.06586	0.129933	3.20997e-58	3.44113e-57	ENSMUSG00000029291	52822	Rufy3	RUN and FYVE domain containing 3
1282.6	1.07822	0.067274	3.43543e-58	3.68008e-57	ENSMUSG00000027455	386649	Nsfl1c	NSFL1 (p97) cofactor (p47)
2085.32	-0.852285	0.0531128	3.60645e-58	3.86041e-57	ENSMUSG00000021395	20729	Spin1	spindlin 1
1370.83	-1.08588	0.0677918	3.94584e-58	4.22055e-57	ENSMUSG00000000740	270106	Rpl13	ribosomal protein L13
152.008	1.80972	0.114016	7.14291e-58	7.63452e-57	ENSMUSG00000031844	15486	Hsd17b2	hydroxysteroid (17-beta) dehydrogenase 2
3700.23	1.1681	0.0731537	7.49044e-58	8.00001e-57	ENSMUSG00000027634	29812	Ndrg3	N-myc downstream regulated gene 3
120.814	-2.59852	0.16385	8.1038e-58	8.64867e-57	ENSMUSG00000021583	80898	Erap1	endoplasmic reticulum aminopeptidase 1
1116.15	0.623053	0.0389153	8.31859e-58	8.87131e-57	ENSMUSG00000020089	67895	Ppa1	pyrophosphatase (inorganic) 1
173.563	2.39931	0.151547	9.93322e-58	1.05854e-56	ENSMUSG00000002228	71887	Ppm1j	protein phosphatase 1J
989.514	0.825859	0.0516755	1.06219e-57	1.13109e-56	ENSMUSG00000022350	223593	Washc5	WASH complex subunit 5
210.129	-3.69203	0.232723	1.06528e-57	1.13354e-56	ENSMUSG00000008090	116701	Fgfrl1	fibroblast growth factor receptor-like 1
918.443	1.05915	0.0663682	1.07201e-57	1.13985e-56	ENSMUSG00000032333	69106	Stoml1	stomatin-like 1
209.178	-2.09267	0.132262	1.07929e-57	1.14674e-56	ENSMUSG00000026502	78825	Desi2	desumoylating isopeptidase 2
1022.89	1.12232	0.0704108	1.29219e-57	1.37194e-56	ENSMUSG00000028226	17389	Mmp16	matrix metallopeptidase 16
1039.62	1.28766	0.0809228	1.39859e-57	1.48381e-56	ENSMUSG00000093989	52898	Rnasek	ribonuclease, RNase K
476.136	1.52752	0.0962303	1.40772e-57	1.49239e-56	ENSMUSG00000030403	22323	Vasp	vasodilator-stimulated phosphoprotein
1098.46	0.845733	0.0530229	1.70913e-57	1.8106e-56	ENSMUSG00000014959	70231	Gorasp2	golgi reassembly stacking protein 2
570.355	-1.05765	0.0664055	1.78069e-57	1.88502e-56	ENSMUSG00000061410	142682	Zcchc14	zinc finger, CCHC domain containing 14
784.401	1.74034	0.110014	1.94484e-57	2.05727e-56	ENSMUSG00000078161	209601	Erich3	glutamate rich 3
4539.76	1.13725	0.0714931	2.10413e-57	2.22412e-56	ENSMUSG00000025809	16412	Itgb1	integrin beta 1 (fibronectin receptor beta)
908.87	0.962646	0.0604621	2.28908e-57	2.41784e-56	ENSMUSG00000032846	67263	Zswim6	zinc finger SWIM-type containing 6
226.546	-4.72826	0.300485	2.41792e-57	2.55206e-56	ENSMUSG00000050121	226115	Opalin	oligodendrocytic myelin paranodal and inner loop protein
6073.65	1.04746	0.0658915	2.94448e-57	3.10554e-56	ENSMUSG00000038664	235439	Herc1	HECT and RLD domain containing E3 ubiquitin protein ligase family member 1
211.335	-1.57497	0.0996182	3.41182e-57	3.5958e-56	ENSMUSG00000020102	20503	Slc16a7	solute carrier family 16 (monocarboxylic acid transporters), member 7
[truncated: 13,062 more rows]

## Sheet: 3_Proprio_CrushIP_ControlIP
baseMean	log2FoldChange	lfcSE	pvalue	padj	ENSEMBL	ENTREZID	SYMBOL	GENENAME
[truncated: 14,374 more rows]

## Sheet: 4_Proprio_ControlIP_ControlI
baseMean	log2FoldChange	lfcSE	pvalue	padj	ENSEMBL	ENTREZID	SYMBOL	GENENAME
[truncated: 14,374 more rows]

[truncated: 4 more sheets: 5_Cuta_CrushIP_ControlIP, 6_Cuta_ControlIP_ControlI, 7_Noci_CrushIP_ControlIP, 8_Noci_ControlIP_ControlI]
