# Supplementary material for: Neuron-specific RNA-sequencing reveals different responses in peripheral neurons after nerve injury
Source: bioRxiv preprint, doi:10.1101/2023.07.21.549881, version 4 (2024-04-30)
Supplement: Supplementary File 3 [file 549881_file10.xlsx]

## Sheet: Info
Each sheet represents the comparison of the two conditions indicated:
1) Motoneurons: crush IP vs control IP
2) Proprioceptors: crush IP vs control IP
3) Cutaneous mechanoreceptors: crush IP vs control IP
4) Nociceptors: crush IP vs control IP

## Sheet: 1_Moto_CrushIP_ControlIP
category	term	number_of_genes	number_of_genes_in_background	ncbiTaxonId	inputGenes	preferredNames	p_value	fdr	description	% genes
Component	GO:0044297	279	836	10090	10090.ENSMUSP00000000122,10090.ENSMUSP00000000193,10090.ENSMUSP00000000542,10090.ENSMUSP00000000572,10090.ENSMUSP00000000641,10090.ENSMUSP00000000939,10090.ENSMUSP00000001452,10090.ENSMUSP00000001566,10090.ENSMUSP00000002487,10090.ENSMUSP00000002708,10090.ENSMUSP00000004202,10090.ENSMUSP00000005066,10090.ENSMUSP00000005077,10090.ENSMUSP00000006467,10090.ENSMUSP00000007207,10090.ENSMUSP00000009550…	Ngfr,Ccl2,Acvrl1,Gabra2,Sema4f,Hip1r,Cct3,Tubb5,Braf,Shh,Dnmt1,Map2k1,Hspb1,Arpc2,Clcn2,Elk1,Kcnd1,Cacybp,Endog,Rbfox3,Timp2,Cd40,Trpv2,Gabarap,G3bp1,Ndel1,Fxr2,Vip,Nts,Atp2b1,Ascl1,Ccng1,Gnb2l1,Kremen1,Kif3c,Dpysl2,Nefm,Klhl1,Cct5,Adcy8,Pmm1,Pde1b,Alcam,P2rx6,Klhl24,Cxadr,Robo1,Sod1,Slc4a8,Ache,Syt4,Gabbr1,Dpysl3,Fas,Ighmbp2,Gal,Slc1a1,Gfra1,Rdh5,Crcp,Podxl,Cct8,Unc5a,Gria4,Vim,Kif5c,Entpd2,Snap…	5.54e-26	5.53e-24	Cell body	33.3732
Component	GO:0030424	256	791	10090	10090.ENSMUSP00000000122,10090.ENSMUSP00000000193,10090.ENSMUSP00000000199,10090.ENSMUSP00000000572,10090.ENSMUSP00000001548,10090.ENSMUSP00000002708,10090.ENSMUSP00000003572,10090.ENSMUSP00000003754,10090.ENSMUSP00000004673,10090.ENSMUSP00000005066,10090.ENSMUSP00000005077,10090.ENSMUSP00000005509,10090.ENSMUSP00000006467,10090.ENSMUSP00000007959,10090.ENSMUSP00000009157,10090.ENSMUSP00000009550…	Ngfr,Ccl2,Ncs1,Gabra2,Itga3,Shh,Gars,Calb2,Ndrg2,Map2k1,Hspb1,Stx1a,Arpc2,Rhoa,Dynll1,Elk1,Limk1,Ctsz,Timp2,Cd40,Trpv2,Ndel1,Fxr2,Cacng2,Nts,Ap3d1,Kif3c,Hif1a,Agtpbp1,Clu,Dpysl2,Nefm,Nefl,Adcy8,Alcam,Pvrl3,Klhl24,Cxadr,Robo1,Sod1,Slc4a8,Ache,Tnfrsf21,Syt4,Gabbr1,Dpysl3,Ighmbp2,Slc1a1,Gfra1,Dctn2,Crcp,Gria4,Arl8a,Uhmk1,Vim,Kif5c,Snap25,Cst3,Kif3b,Stmn2,Anxa5,Prss12,Casp6,Ptbp2,Calb1,Txn1,Prkaa2,Tn…	2.22e-22	1.64e-20	Axon	32.3641
Component	GO:0043025	244	743	10090	10090.ENSMUSP00000000122,10090.ENSMUSP00000000193,10090.ENSMUSP00000000542,10090.ENSMUSP00000000572,10090.ENSMUSP00000000641,10090.ENSMUSP00000000939,10090.ENSMUSP00000002708,10090.ENSMUSP00000004202,10090.ENSMUSP00000005066,10090.ENSMUSP00000005077,10090.ENSMUSP00000006467,10090.ENSMUSP00000007207,10090.ENSMUSP00000009550,10090.ENSMUSP00000009875,10090.ENSMUSP00000015481,10090.ENSMUSP00000017576…	Ngfr,Ccl2,Acvrl1,Gabra2,Sema4f,Hip1r,Shh,Dnmt1,Map2k1,Hspb1,Arpc2,Clcn2,Elk1,Kcnd1,Endog,Rbfox3,Timp2,Cd40,G3bp1,Ndel1,Fxr2,Vip,Nts,Atp2b1,Ascl1,Ccng1,Gnb2l1,Kremen1,Kif3c,Dpysl2,Nefm,Klhl1,Adcy8,Pmm1,Pde1b,Alcam,P2rx6,Klhl24,Robo1,Sod1,Slc4a8,Ache,Syt4,Gabbr1,Fas,Ighmbp2,Gal,Slc1a1,Gfra1,Crcp,Unc5a,Gria4,Kif5c,Snap25,Cst3,Snph,Stmn2,Anxa5,Serpini1,Casp6,Cnn3,Ptbp2,Calb1,Txn1,Prkaa2,Tnfrsf1b,Ppt1…	4.8e-22	3.39e-20	Neuronal cell body	32.8398
Component	GO:0098794	244	761	10090	10090.ENSMUSP00000000109,10090.ENSMUSP00000000122,10090.ENSMUSP00000000199,10090.ENSMUSP00000000543,10090.ENSMUSP00000000572,10090.ENSMUSP00000000641,10090.ENSMUSP00000000939,10090.ENSMUSP00000001319,10090.ENSMUSP00000002848,10090.ENSMUSP00000003971,10090.ENSMUSP00000005066,10090.ENSMUSP00000005077,10090.ENSMUSP00000005509,10090.ENSMUSP00000006181,10090.ENSMUSP00000006467,10090.ENSMUSP00000007130…	Cntn1,Ngfr,Ncs1,Grasp,Gabra2,Sema4f,Hip1r,Efnb2,Grin2d,Lin7b,Map2k1,Hspb1,Stx1a,Napa,Arpc2,Ctnnb1,Rhoa,Rps18,Syn2,Wasf3,Pfn1,Fxr2,Cacng2,Gipc1,Eif4ebp2,Ap3d1,Adcy1,Dynll2,Slc6a4,Cyp46a1,Cap2,Nefm,Nefl,Rnf19a,Ywhaz,Adcy8,Sharpin,Pvrl3,P2rx6,Pak2,Faim2,Asic1,Ache,Syt4,Gabbr1,Cnih2,Apba1,Slc1a1,Gpr123,Farp1,Mkln1,Gria4,Snap25,Napb,Fabp5,Psma7,Glrb,Cnn3,Eif4e,Calb1,Ncdn,Grik3,Stx12,Rheb,Cdk5,Gabrd,Ns…	6.16e-21	4.18e-19	Postsynapse	32.0631
Process	GO:0031344	248	797	10090	10090.ENSMUSP00000000109,10090.ENSMUSP00000000122,10090.ENSMUSP00000000127,10090.ENSMUSP00000000199,10090.ENSMUSP00000000590,10090.ENSMUSP00000000641,10090.ENSMUSP00000001319,10090.ENSMUSP00000001347,10090.ENSMUSP00000001548,10090.ENSMUSP00000001780,10090.ENSMUSP00000002487,10090.ENSMUSP00000004326,10090.ENSMUSP00000004646,10090.ENSMUSP00000004920,10090.ENSMUSP00000005066,10090.ENSMUSP00000005077…	Cntn1,Ngfr,Wnt3,Ncs1,Rdx,Sema4f,Efnb2,Rnd2,Itga3,Akt1,Braf,Plxna3,Coro1c,Ulk2,Map2k1,Hspb1,Cd44,Klf5,Arpc2,Tgfbr1,Rhoa,Gprc5b,Coro1b,Rala,Bmp7,Dynll1,Limk1,Xk,Cers2,Ctsz,Pfn1,Trpv2,Ndel1,Fxr2,Hdac2,Snx3,Kremen1,Sh3yl1,Kif3c,Nme2,F2rl1,Plk2,Dpysl2,Nefm,Nefl,Spry2,Twf1,Atg3,Rrn3,Robo1,Adamts1,Ache,Rhoq,Syt4,Dpysl3,Ehd1,Ppp2r5b,Ankrd1,Slit1,Podxl,Itm2c,Rab29,Vim,Itga6,Snap25,Stmn2,Serpini1,Pdpn,Sema…	6.93e-20	1.99e-17	Regulation of cell projection organization	31.1167
COMPARTMENTS	GOCC:0036477	228	711	10090	10090.ENSMUSP00000000122,10090.ENSMUSP00000000193,10090.ENSMUSP00000000199,10090.ENSMUSP00000000572,10090.ENSMUSP00000002708,10090.ENSMUSP00000005066,10090.ENSMUSP00000005077,10090.ENSMUSP00000006467,10090.ENSMUSP00000007130,10090.ENSMUSP00000007207,10090.ENSMUSP00000007959,10090.ENSMUSP00000009875,10090.ENSMUSP00000015481,10090.ENSMUSP00000017576,10090.ENSMUSP00000017799,10090.ENSMUSP00000018880…	Ngfr,Ccl2,Ncs1,Gabra2,Shh,Map2k1,Hspb1,Arpc2,Ctnnb1,Clcn2,Rhoa,Kcnd1,Endog,Rbfox3,Cd40,Ndel1,Fxr2,Cacng2,Gipc1,Vip,Nts,Atp2b1,Ascl1,Gnb2l1,Cyp46a1,Ctla2a,Adcy2,Plk2,Dpysl2,Nefm,Klhl1,Jph4,Adcy8,Pmm1,Alcam,Pvrl3,P2rx6,Sod1,Asic1,Slc4a8,Ache,Syt4,Gabbr1,Fas,Ighmbp2,Cnih2,Apba1,Gal,Slc1a1,Gfra1,Inpp5a,Farp1,Unc5a,Gria4,Uhmk1,Kif5c,Snap25,Snph,Stmn2,Anxa5,Serpini1,Prss12,Casp6,Cnn3,Calb1,Ppt1,Adc,Tme…	1.26e-19	1.81e-17	Somatodendritic compartment	32.0675
Process	GO:0120035	245	788	10090	10090.ENSMUSP00000000109,10090.ENSMUSP00000000122,10090.ENSMUSP00000000127,10090.ENSMUSP00000000199,10090.ENSMUSP00000000590,10090.ENSMUSP00000000641,10090.ENSMUSP00000001319,10090.ENSMUSP00000001347,10090.ENSMUSP00000001548,10090.ENSMUSP00000001780,10090.ENSMUSP00000002487,10090.ENSMUSP00000004326,10090.ENSMUSP00000004646,10090.ENSMUSP00000004920,10090.ENSMUSP00000005066,10090.ENSMUSP00000005077…	Cntn1,Ngfr,Wnt3,Ncs1,Rdx,Sema4f,Efnb2,Rnd2,Itga3,Akt1,Braf,Plxna3,Coro1c,Ulk2,Map2k1,Hspb1,Cd44,Klf5,Arpc2,Tgfbr1,Rhoa,Gprc5b,Coro1b,Rala,Bmp7,Dynll1,Limk1,Xk,Cers2,Ctsz,Pfn1,Trpv2,Ndel1,Fxr2,Hdac2,Snx3,Kremen1,Sh3yl1,Kif3c,Nme2,F2rl1,Plk2,Dpysl2,Nefm,Nefl,Twf1,Atg3,Rrn3,Robo1,Adamts1,Ache,Rhoq,Syt4,Dpysl3,Ehd1,Ppp2r5b,Ankrd1,Slit1,Podxl,Itm2c,Rab29,Vim,Itga6,Snap25,Stmn2,Serpini1,Pdpn,Sema3c,Sem…	1.28e-19	3.59e-17	Regulation of plasma membrane bounded cell projection organization	31.0914
Process	GO:0010975	202	607	10090	10090.ENSMUSP00000000109,10090.ENSMUSP00000000122,10090.ENSMUSP00000000127,10090.ENSMUSP00000000199,10090.ENSMUSP00000000641,10090.ENSMUSP00000001319,10090.ENSMUSP00000001347,10090.ENSMUSP00000001548,10090.ENSMUSP00000001780,10090.ENSMUSP00000002487,10090.ENSMUSP00000004326,10090.ENSMUSP00000004920,10090.ENSMUSP00000005066,10090.ENSMUSP00000005077,10090.ENSMUSP00000007959,10090.ENSMUSP00000008878…	Cntn1,Ngfr,Wnt3,Ncs1,Sema4f,Efnb2,Rnd2,Itga3,Akt1,Braf,Plxna3,Ulk2,Map2k1,Hspb1,Rhoa,Gprc5b,Bmp7,Limk1,Xk,Cers2,Ctsz,Trpv2,Ndel1,Hdac2,Snx3,Kremen1,Kif3c,Nme2,Plk2,Dpysl2,Nefm,Nefl,Twf1,Rrn3,Robo1,Adamts1,Ache,Syt4,Dpysl3,Ehd1,Ppp2r5b,Ankrd1,Slit1,Itm2c,Rab29,Vim,Itga6,Snap25,Stmn2,Serpini1,Sema3c,Sema3a,Cdk5,Draxin,Sema3d,Cd38,Rufy3,Scarb2,Ret,Lrp6,Camk1,Fkbp4,Xylt1,Pak1,Ilk,Fgf13,Sfrp1,Ist1,Cx3…	6.32e-19	1.6e-16	Regulation of neuron projection development	33.2784
Component	GO:0097447	232	755	10090	10090.ENSMUSP00000000122,10090.ENSMUSP00000000193,10090.ENSMUSP00000000199,10090.ENSMUSP00000000542,10090.ENSMUSP00000000572,10090.ENSMUSP00000000641,10090.ENSMUSP00000000939,10090.ENSMUSP00000001809,10090.ENSMUSP00000002708,10090.ENSMUSP00000003754,10090.ENSMUSP00000005066,10090.ENSMUSP00000005077,10090.ENSMUSP00000006467,10090.ENSMUSP00000007130,10090.ENSMUSP00000007207,10090.ENSMUSP00000007959…	Ngfr,Ccl2,Ncs1,Acvrl1,Gabra2,Sema4f,Hip1r,Pabpc1,Shh,Calb2,Map2k1,Hspb1,Arpc2,Ctnnb1,Clcn2,Rhoa,Elk1,Kcnd1,Fxr2,Gipc1,Nsg2,Ccng1,Gnb2l1,Kif3c,Cyp46a1,Ctla2a,Adcy2,Plk2,Ero1l,Clu,Dpysl2,Klhl1,Jph4,Adcy8,Sharpin,Lynx1,Alcam,Pvrl3,P2rx6,Sod1,Asic1,Slc4a8,Ache,Syt4,Gabbr1,Fas,Cnih2,Apba1,Slc1a1,Crcp,Farp1,Gria4,Uhmk1,Kif5c,Anxa5,Prss12,Glrb,Cnn3,Calb1,Txn1,Prkaa2,Ppt1,Adc,Ncdn,Grik3,Sema3a,Rheb,Cdk5,…	3.96e-18	2.24e-16	Dendritic tree	30.7285
Component	GO:0030425	231	753	10090	10090.ENSMUSP00000000122,10090.ENSMUSP00000000193,10090.ENSMUSP00000000199,10090.ENSMUSP00000000542,10090.ENSMUSP00000000572,10090.ENSMUSP00000000641,10090.ENSMUSP00000000939,10090.ENSMUSP00000001809,10090.ENSMUSP00000002708,10090.ENSMUSP00000003754,10090.ENSMUSP00000005066,10090.ENSMUSP00000005077,10090.ENSMUSP00000006467,10090.ENSMUSP00000007130,10090.ENSMUSP00000007207,10090.ENSMUSP00000007959…	Ngfr,Ccl2,Ncs1,Acvrl1,Gabra2,Sema4f,Hip1r,Pabpc1,Shh,Calb2,Map2k1,Hspb1,Arpc2,Ctnnb1,Clcn2,Rhoa,Elk1,Kcnd1,Fxr2,Gipc1,Nsg2,Ccng1,Gnb2l1,Kif3c,Cyp46a1,Ctla2a,Adcy2,Plk2,Ero1l,Clu,Dpysl2,Klhl1,Jph4,Adcy8,Sharpin,Lynx1,Alcam,Pvrl3,P2rx6,Sod1,Asic1,Slc4a8,Ache,Syt4,Gabbr1,Fas,Cnih2,Apba1,Slc1a1,Crcp,Farp1,Gria4,Uhmk1,Kif5c,Anxa5,Prss12,Glrb,Cnn3,Calb1,Txn1,Prkaa2,Ppt1,Adc,Ncdn,Grik3,Sema3a,Rheb,Cdk5,…	5.51e-18	3.01e-16	Dendrite	30.6773
COMPARTMENTS	GOCC:0030424	186	554	10090	10090.ENSMUSP00000000193,10090.ENSMUSP00000000199,10090.ENSMUSP00000000572,10090.ENSMUSP00000001548,10090.ENSMUSP00000002708,10090.ENSMUSP00000003572,10090.ENSMUSP00000003754,10090.ENSMUSP00000005066,10090.ENSMUSP00000005077,10090.ENSMUSP00000005509,10090.ENSMUSP00000006467,10090.ENSMUSP00000007959,10090.ENSMUSP00000009157,10090.ENSMUSP00000015137,10090.ENSMUSP00000017610,10090.ENSMUSP00000017799…	Ccl2,Ncs1,Gabra2,Itga3,Shh,Gars,Calb2,Map2k1,Hspb1,Stx1a,Arpc2,Rhoa,Dynll1,Limk1,Timp2,Cd40,Trpv2,Ndel1,Cacng2,Nts,Ap3d1,Kif3c,Clu,Dpysl2,Nefm,Nefl,Adcy8,Alcam,Cxadr,Robo1,Slc4a8,Ache,Tnfrsf21,Syt4,Gabbr1,Dpysl3,Ighmbp2,Slc1a1,Gfra1,Dctn2,Gria4,Kif5c,Snap25,Stmn2,Anxa5,Prss12,Casp6,Ptbp2,Calb1,Tnfrsf1b,Ppt1,Pink1,Tmem57,Grik3,Sema3a,Cdk5,Uchl1,Rufy3,Fscn1,Npy,Ret,Fkbp4,Slc17a6,Pak1,Ilk,Fgf13,Gpm6…	7.87e-18	1e-15	Axon	33.574
Process	GO:0045664	234	774	10090	10090.ENSMUSP00000000109,10090.ENSMUSP00000000122,10090.ENSMUSP00000000127,10090.ENSMUSP00000000199,10090.ENSMUSP00000000579,10090.ENSMUSP00000000641,10090.ENSMUSP00000001319,10090.ENSMUSP00000001347,10090.ENSMUSP00000001548,10090.ENSMUSP00000001780,10090.ENSMUSP00000002487,10090.ENSMUSP00000002708,10090.ENSMUSP00000004326,10090.ENSMUSP00000004920,10090.ENSMUSP00000005066,10090.ENSMUSP00000005077…	Cntn1,Ngfr,Wnt3,Ncs1,Sox9,Sema4f,Efnb2,Rnd2,Itga3,Akt1,Braf,Shh,Plxna3,Ulk2,Map2k1,Hspb1,Rhoa,Gprc5b,Bmp7,Limk1,Xk,Cers2,Ctsz,Timp2,Trpv2,Ndel1,Hdac2,Snx3,Ascl1,Kremen1,Kif3c,Slc6a4,Nme2,Plk2,Dpysl2,Nefm,Nefl,Twf1,Bcl6,Rrn3,Robo1,Adamts1,Ache,Syt4,Impact,Dpysl3,Ehd1,Ppp2r5b,Ankrd1,Slit1,Ctdsp1,Itm2c,Rab29,Vim,Itga6,Snap25,Jag1,Stmn2,Serpini1,Efna3,Eif4e,Sema3c,Sema3a,Cdk5,Draxin,Sema3d,Cd38,Rufy3…	1.36e-17	2.93e-15	Regulation of neuron differentiation	30.2326
Process	GO:0050767	271	948	10090	10090.ENSMUSP00000000109,10090.ENSMUSP00000000122,10090.ENSMUSP00000000127,10090.ENSMUSP00000000199,10090.ENSMUSP00000000579,10090.ENSMUSP00000000641,10090.ENSMUSP00000001319,10090.ENSMUSP00000001347,10090.ENSMUSP00000001548,10090.ENSMUSP00000001780,10090.ENSMUSP00000001963,10090.ENSMUSP00000002487,10090.ENSMUSP00000002708,10090.ENSMUSP00000004326,10090.ENSMUSP00000004920,10090.ENSMUSP00000005066…	Cntn1,Ngfr,Wnt3,Ncs1,Sox9,Sema4f,Efnb2,Rnd2,Itga3,Akt1,Ace,Braf,Shh,Plxna3,Ulk2,Map2k1,Hspb1,Wdr1,Ctnnb1,Rhoa,Gprc5b,Bmp7,Csf1,Limk1,Xk,Cers2,Ctsz,Timp2,Trpv2,Ndel1,Hdac2,Snx3,Ascl1,Kremen1,Kif3c,Slc6a4,Nme2,Snw1,Hif1a,Plk2,Dpysl2,Nefm,Nefl,Twf1,Bcl6,Rrn3,Robo1,Adamts1,Ache,Tnfrsf21,Syt4,Impact,Dpysl3,Ehd1,Fas,Ppp2r5b,Ankrd1,Rela,Slit1,Ctdsp1,Itm2c,Rab29,Vim,Itga6,Snap25,Jag1,Stmn2,Serpini1,Efna3…	1.39e-17	2.95e-15	Regulation of neurogenesis	28.5865
COMPARTMENTS	GOCC:0098794	186	563	10090	10090.ENSMUSP00000000109,10090.ENSMUSP00000000122,10090.ENSMUSP00000000199,10090.ENSMUSP00000000543,10090.ENSMUSP00000000572,10090.ENSMUSP00000001319,10090.ENSMUSP00000002848,10090.ENSMUSP00000005077,10090.ENSMUSP00000005509,10090.ENSMUSP00000006467,10090.ENSMUSP00000007130,10090.ENSMUSP00000007959,10090.ENSMUSP00000009538,10090.ENSMUSP00000018437,10090.ENSMUSP00000018909,10090.ENSMUSP00000019290…	Cntn1,Ngfr,Ncs1,Grasp,Gabra2,Efnb2,Grin2d,Hspb1,Stx1a,Arpc2,Ctnnb1,Rhoa,Syn2,Pfn1,Fxr2,Cacng2,Gipc1,Eif4ebp2,Adcy1,Slc6a4,Cyp46a1,Cap2,Nefm,Nefl,Ywhaz,Adcy8,Sharpin,Pvrl3,P2rx6,Asic1,Ache,Syt4,Gabbr1,Cnih2,Apba1,Slc1a1,Farp1,Gria4,Snap25,Fabp5,Cnn3,Eif4e,Calb1,Stx12,Rheb,Cdk5,Gabrd,Nsg1,Gabrg1,Wasl,Add2,Slc6a6,Pak1,Stx4a,Slc6a8,Plat,Cbln1,Pin1,Snx1,Bsn,Tanc1,Clstn1,Grm1,Cplx1,Htr5a,Ppp1ca,Hnrnpk,…	2.96e-17	3.56e-15	Postsynapse	33.0373
Process	GO:0031175	212	697	10090	10090.ENSMUSP00000000109,10090.ENSMUSP00000000122,10090.ENSMUSP00000000127,10090.ENSMUSP00000000641,10090.ENSMUSP00000001319,10090.ENSMUSP00000002708,10090.ENSMUSP00000004326,10090.ENSMUSP00000004920,10090.ENSMUSP00000005066,10090.ENSMUSP00000005218,10090.ENSMUSP00000007130,10090.ENSMUSP00000007959,10090.ENSMUSP00000009143,10090.ENSMUSP00000017629,10090.ENSMUSP00000017868,10090.ENSMUSP00000018880…	Cntn1,Ngfr,Wnt3,Sema4f,Efnb2,Shh,Plxna3,Ulk2,Map2k1,Cd44,Ctnnb1,Rhoa,Bmp7,Top2b,Etv4,Ndel1,Hdac2,Egfr,Btg2,Adcy1,Rab10,Slc9a3r1,Dhfr,Vcl,Clu,Dpysl2,Nefl,Klhl1,Rb1,Alcam,Pak2,Robo1,Sod1,Tnfrsf21,Vapa,Impact,Smad4,Ehd1,Fas,Slit1,Gfra1,Farp1,Nptx1,Hprt,Unc5a,Lhx4,Uhmk1,Kif5c,Stmn2,Casp6,Efna3,Nr4a3,Sema3c,Stmn1,Ncdn,Sema3a,Cdk5,Draxin,Sema3d,Uchl1,Rab35,Wasl,Npy,Pak1,Ilk,Wee1,Acsl4,Gpm6a,Pvrl1,Isl2,…	2.9e-16	5.67e-14	Neuron projection development	30.4161
Component	GO:0098978	168	501	10090	10090.ENSMUSP00000000199,10090.ENSMUSP00000000543,10090.ENSMUSP00000001319,10090.ENSMUSP00000002848,10090.ENSMUSP00000004673,10090.ENSMUSP00000004990,10090.ENSMUSP00000005066,10090.ENSMUSP00000005256,10090.ENSMUSP00000005509,10090.ENSMUSP00000006181,10090.ENSMUSP00000006467,10090.ENSMUSP00000007959,10090.ENSMUSP00000009538,10090.ENSMUSP00000016143,10090.ENSMUSP00000018437,10090.ENSMUSP00000018644…	Ncs1,Grasp,Efnb2,Grin2d,Ndrg2,Mapk14,Map2k1,Ndrg1,Stx1a,Napa,Arpc2,Rhoa,Syn2,Wasf3,Pfn1,Adora2b,Fxr2,Cacng2,Gipc1,Atp2b1,Ap3d1,Adcy1,Dynll2,Rnf19a,Ywhaz,Adcy8,P2rx6,Pak2,Slc4a8,Syt4,Gabbr1,Cnih2,Apba1,Rela,Gpr123,Farp1,Nptx1,Gria4,Snap25,Napb,Gucy1b3,Eif4e,Calb1,Vcp,Grik3,Rheb,Cdk5,Gabrd,Nsg1,Sparcl1,Wasl,Add2,Camk1,Slc2a3,Acan,Pak1,Stx4a,Slc6a8,Gpm6a,Plat,Cbln1,Egln1,Pin1,Bsn,Tanc1,Clstn1,Grm1,C…	3.52e-16	1.81e-14	Glutamatergic synapse	33.5329
COMPARTMENTS	GOCC:0044297	166	493	10090	10090.ENSMUSP00000000122,10090.ENSMUSP00000000193,10090.ENSMUSP00000000572,10090.ENSMUSP00000001452,10090.ENSMUSP00000002487,10090.ENSMUSP00000002708,10090.ENSMUSP00000005066,10090.ENSMUSP00000005077,10090.ENSMUSP00000006467,10090.ENSMUSP00000007207,10090.ENSMUSP00000009875,10090.ENSMUSP00000015481,10090.ENSMUSP00000017576,10090.ENSMUSP00000018651,10090.ENSMUSP00000018880,10090.ENSMUSP00000019906…	Ngfr,Ccl2,Gabra2,Cct3,Braf,Shh,Map2k1,Hspb1,Arpc2,Clcn2,Kcnd1,Endog,Rbfox3,Trpv2,Ndel1,Vip,Nts,Atp2b1,Ascl1,Gnb2l1,Dpysl2,Nefm,Klhl1,Cct5,Adcy8,Pmm1,Alcam,Cxadr,Robo1,Sod1,Slc4a8,Ache,Gabbr1,Dpysl3,Ighmbp2,Gal,Slc1a1,Gfra1,Podxl,Cct8,Unc5a,Gria4,Vim,Kif5c,Snap25,Snph,Stmn2,Anxa5,Serpini1,Casp6,Apoa1bp,Calb1,Ppt1,Pink1,Adc,Tmem50a,Ncdn,Grik3,Cdk5,Uchl1,Rufy3,Cct6a,Npy,Ret,Gabarapl1,Acan,Cx3cl1,Bsn…	3.91e-16	4.23e-14	Cell body	33.6714
Process	GO:0032880	270	978	10090	10090.ENSMUSP00000000058,10090.ENSMUSP00000000122,10090.ENSMUSP00000000193,10090.ENSMUSP00000000543,10090.ENSMUSP00000000590,10090.ENSMUSP00000001319,10090.ENSMUSP00000001452,10090.ENSMUSP00000001507,10090.ENSMUSP00000001548,10090.ENSMUSP00000001592,10090.ENSMUSP00000001780,10090.ENSMUSP00000002029,10090.ENSMUSP00000002320,10090.ENSMUSP00000002708,10090.ENSMUSP00000003442,10090.ENSMUSP00000004990…	Cav2,Ngfr,Ccl2,Grasp,Rdx,Efnb2,Cct3,Cyp51,Itga3,Jup,Akt1,Emd,Ppard,Shh,Cacnb3,Mapk14,Map2k1,Wisp1,Arpc2,Ctnnb1,Dynll1,Glis2,Nol3,Cd40,Ndel1,Cacng2,Vip,Snx3,Mcu,Egfr,Pfkl,Gnb2l1,Srebf1,Rsad2,Dnajc27,Stx8,Ppm1a,Hif1a,Chga,Hmgcr,F2rl1,Glud1,Vcl,Rgcc,Rb1,Cct5,Angpt1,Adcy8,Mief1,Tfrc,Abcg1,Rhoq,Arhgdig,Syt4,Pmaip1,Ankrd1,Cnih2,Cpt1a,Maged1,Cct8,Casp1,Ppm1f,Rassf5,Rab29,Stx6,Parp1,Uhmk1,Acvr1c,Gsn,Stom…	6.03e-16	1.13e-13	Regulation of protein localization	27.6074
Process	GO:0048666	244	855	10090	10090.ENSMUSP00000000109,10090.ENSMUSP00000000122,10090.ENSMUSP00000000127,10090.ENSMUSP00000000641,10090.ENSMUSP00000001319,10090.ENSMUSP00000002466,10090.ENSMUSP00000002708,10090.ENSMUSP00000003451,10090.ENSMUSP00000004326,10090.ENSMUSP00000004920,10090.ENSMUSP00000005066,10090.ENSMUSP00000005218,10090.ENSMUSP00000007130,10090.ENSMUSP00000007959,10090.ENSMUSP00000008579,10090.ENSMUSP00000009143…	Cntn1,Ngfr,Wnt3,Sema4f,Efnb2,Nr2f6,Shh,Rnd1,Plxna3,Ulk2,Map2k1,Cd44,Ctnnb1,Rhoa,Rdh13,Bmp7,Top2b,Etv4,Ndel1,Hdac2,Ntn4,Ascl1,Egfr,Btg2,Adcy1,Rab10,Slc9a3r1,Agtpbp1,Dhfr,Cdhr1,Vcl,Clu,Dpysl2,Nefl,Klhl1,Rb1,Ywhaz,Alcam,Pak2,Robo1,Sod1,Tnfrsf21,Vapa,Impact,Smad4,Ehd1,Fas,Slit1,Gfra1,Hexa,Farp1,Nptx1,Hprt,Unc5a,Lhx4,Uhmk1,Kif5c,Stmn2,Casp6,Efna3,Nr4a3,Ugcg,Gba2,Sema3c,Stmn1,Ncdn,Sema3a,Cdk5,Draxin,Se…	7.52e-16	1.39e-13	Neuron development	28.538
TISSUES	BTO:0000478	186	596	10090	10090.ENSMUSP00000000122,10090.ENSMUSP00000000590,10090.ENSMUSP00000001780,10090.ENSMUSP00000001963,10090.ENSMUSP00000002885,10090.ENSMUSP00000003572,10090.ENSMUSP00000003754,10090.ENSMUSP00000004327,10090.ENSMUSP00000004396,10090.ENSMUSP00000005066,10090.ENSMUSP00000005234,10090.ENSMUSP00000013842,10090.ENSMUSP00000017572,10090.ENSMUSP00000017576,10090.ENSMUSP00000018437,10090.ENSMUSP00000018803…	Ngfr,Rdx,Akt1,Ace,Epdr1,Gars,Calb2,G6pdx,Atp6v1f,Map2k1,Wdr1,Pea15a,Psmd11,Rbfox3,Pfn1,Pnpo,D17Wsu104e,Vip,Mtres1,Nts,Avpr1a,Gnb2l1,Grb2,Fkbp3,Sgpp1,Tmx1,Fos,Cap2,Ogn,Pdhb,Opn4,Cdhr1,Nefm,Nefl,Samm50,Lynx1,Sod1,Ache,Caskin1,Pmaip1,Otub1,Gal,Stip1,Hprt,Cops5,Vim,Snap25,Napb,Fabp5,Dok5,Acss2,Calb1,Akr1a1,Cmpk1,Pink1,Stmn1,Slc9a1,Cdk5,Draxin,Gabrg1,Uchl1,Fam69a,Rufy3,Npy,Add2,Slc17a6,Nucb1,Fem1b,Etf…	2.83e-15	5.55e-13	Forebrain	31.2081
TISSUES	BTO:0000233	160	483	10090	10090.ENSMUSP00000000122,10090.ENSMUSP00000000590,10090.ENSMUSP00000001780,10090.ENSMUSP00000001963,10090.ENSMUSP00000003572,10090.ENSMUSP00000003754,10090.ENSMUSP00000004327,10090.ENSMUSP00000004396,10090.ENSMUSP00000005066,10090.ENSMUSP00000005234,10090.ENSMUSP00000013842,10090.ENSMUSP00000017572,10090.ENSMUSP00000017576,10090.ENSMUSP00000018437,10090.ENSMUSP00000018803,10090.ENSMUSP00000019932…	Ngfr,Rdx,Akt1,Ace,Gars,Calb2,G6pdx,Atp6v1f,Map2k1,Wdr1,Pea15a,Psmd11,Rbfox3,Pfn1,Pnpo,Mtres1,Avpr1a,Gnb2l1,Grb2,Sgpp1,Tmx1,Fos,Cap2,Pdhb,Opn4,Cdhr1,Nefm,Nefl,Samm50,Lynx1,Sod1,Ache,Caskin1,Pmaip1,Otub1,Stip1,Hprt,Cops5,Snap25,Napb,Fabp5,Dok5,Acss2,Calb1,Akr1a1,Cmpk1,Pink1,Stmn1,Slc9a1,Cdk5,Gabrg1,Uchl1,Fam69a,Rufy3,Npy,Add2,Slc17a6,Nucb1,Fem1b,Etfa,Me1,Bsn,Atxn2l,Scai,Pdxk,Ppp1ca,Hnrnpk,Atp13a2,A…	4.28e-15	7.83e-13	Cerebral cortex	33.1263
TISSUES	BTO:0000231	161	495	10090	10090.ENSMUSP00000000122,10090.ENSMUSP00000000590,10090.ENSMUSP00000001780,10090.ENSMUSP00000001963,10090.ENSMUSP00000003572,10090.ENSMUSP00000003754,10090.ENSMUSP00000004327,10090.ENSMUSP00000004396,10090.ENSMUSP00000005066,10090.ENSMUSP00000005234,10090.ENSMUSP00000013842,10090.ENSMUSP00000017572,10090.ENSMUSP00000017576,10090.ENSMUSP00000018437,10090.ENSMUSP00000018803,10090.ENSMUSP00000019932…	Ngfr,Rdx,Akt1,Ace,Gars,Calb2,G6pdx,Atp6v1f,Map2k1,Wdr1,Pea15a,Psmd11,Rbfox3,Pfn1,Pnpo,Mtres1,Avpr1a,Gnb2l1,Grb2,Sgpp1,Tmx1,Fos,Cap2,Pdhb,Opn4,Cdhr1,Nefm,Nefl,Samm50,Lynx1,Sod1,Ache,Caskin1,Pmaip1,Otub1,Stip1,Hprt,Cops5,Snap25,Napb,Fabp5,Dok5,Acss2,Calb1,Akr1a1,Cmpk1,Pink1,Stmn1,Slc9a1,Cdk5,Draxin,Gabrg1,Uchl1,Fam69a,Rufy3,Npy,Add2,Slc17a6,Nucb1,Fem1b,Etfa,Me1,Bsn,Atxn2l,Scai,Pdxk,Ppp1ca,Hnrnpk,At…	1.27e-14	2.18e-12	Cerebral hemisphere	32.5253
COMPARTMENTS	GOCC:0043025	133	377	10090	10090.ENSMUSP00000000122,10090.ENSMUSP00000000193,10090.ENSMUSP00000000572,10090.ENSMUSP00000002708,10090.ENSMUSP00000005066,10090.ENSMUSP00000005077,10090.ENSMUSP00000006467,10090.ENSMUSP00000007207,10090.ENSMUSP00000009875,10090.ENSMUSP00000015481,10090.ENSMUSP00000017576,10090.ENSMUSP00000018880,10090.ENSMUSP00000019906,10090.ENSMUSP00000020040,10090.ENSMUSP00000020107,10090.ENSMUSP00000020243…	Ngfr,Ccl2,Gabra2,Shh,Map2k1,Hspb1,Arpc2,Clcn2,Kcnd1,Endog,Rbfox3,Ndel1,Vip,Nts,Atp2b1,Ascl1,Gnb2l1,Dpysl2,Nefm,Klhl1,Adcy8,Pmm1,Alcam,Sod1,Slc4a8,Ache,Gabbr1,Ighmbp2,Gal,Slc1a1,Gfra1,Unc5a,Gria4,Kif5c,Snap25,Snph,Stmn2,Anxa5,Serpini1,Casp6,Calb1,Ppt1,Adc,Tmem50a,Ncdn,Grik3,Cdk5,Uchl1,Rufy3,Npy,Ret,Acan,Cx3cl1,Bsn,Tanc1,Grm1,Htr5a,Ppp1ca,Ptprf,Map2k4,Kcna2,Dner,Sncb,Htr2a,Cpe,Grin3b,Kndc1,Nrsn1,Kc…	2.12e-14	2e-12	Neuronal cell body	35.2785
TISSUES	BTO:0000239	164	513	10090	10090.ENSMUSP00000000122,10090.ENSMUSP00000000590,10090.ENSMUSP00000001780,10090.ENSMUSP00000001963,10090.ENSMUSP00000003572,10090.ENSMUSP00000003754,10090.ENSMUSP00000004327,10090.ENSMUSP00000004396,10090.ENSMUSP00000005066,10090.ENSMUSP00000005234,10090.ENSMUSP00000013842,10090.ENSMUSP00000017572,10090.ENSMUSP00000017576,10090.ENSMUSP00000018437,10090.ENSMUSP00000018803,10090.ENSMUSP00000019932…	Ngfr,Rdx,Akt1,Ace,Gars,Calb2,G6pdx,Atp6v1f,Map2k1,Wdr1,Pea15a,Psmd11,Rbfox3,Pfn1,Pnpo,Mtres1,Avpr1a,Gnb2l1,Grb2,Fkbp3,Sgpp1,Tmx1,Fos,Cap2,Pdhb,Opn4,Cdhr1,Nefm,Nefl,Samm50,Lynx1,Sod1,Ache,Caskin1,Pmaip1,Otub1,Stip1,Hprt,Cops5,Snap25,Napb,Fabp5,Dok5,Acss2,Calb1,Akr1a1,Cmpk1,Pink1,Stmn1,Slc9a1,Cdk5,Draxin,Gabrg1,Uchl1,Fam69a,Rufy3,Npy,Add2,Slc17a6,Nucb1,Fem1b,Etfa,Me1,Bsn,Atxn2l,Scai,Pdxk,Fam103a1,P…	2.43e-14	3.91e-12	Telencephalon	31.9688
Component	GO:0097060	152	464	10090	10090.ENSMUSP00000000109,10090.ENSMUSP00000000543,10090.ENSMUSP00000000572,10090.ENSMUSP00000000641,10090.ENSMUSP00000000939,10090.ENSMUSP00000001319,10090.ENSMUSP00000001548,10090.ENSMUSP00000002848,10090.ENSMUSP00000003550,10090.ENSMUSP00000003754,10090.ENSMUSP00000003971,10090.ENSMUSP00000005077,10090.ENSMUSP00000005509,10090.ENSMUSP00000007130,10090.ENSMUSP00000019290,10090.ENSMUSP00000020107…	Cntn1,Grasp,Gabra2,Sema4f,Hip1r,Efnb2,Itga3,Grin2d,Ncstn,Calb2,Lin7b,Hspb1,Stx1a,Ctnnb1,Cacng2,Atp2b1,Adcy1,Slc6a4,Adcy8,Pvrl3,P2rx6,Faim2,Slc4a8,Ache,Gabbr1,Cnih2,Apba1,Farp1,Gria4,Snap25,Snph,Glrb,Grik3,Gabrd,Nsg1,Gabrg1,Slc6a6,Sspn,Slc2a3,Stx4a,Atp6ap2,Slc6a8,Gpm6a,Cbln1,Pvrl1,Nt5e,Clstn1,Grm1,Htr5a,Ptprf,Exoc3,Kcna2,Syde1,Zdhhc17,Pacsin1,Psenen,Pcdh8,Rims4,Kcnk1,Akap9,Dagla,Igsf21,Htr2a,Cpe,G…	4.41e-14	2.08e-12	Synaptic membrane	32.7586
RCTM	MMU-422475	108	278	10090	10090.ENSMUSP00000000590,10090.ENSMUSP00000001319,10090.ENSMUSP00000001513,10090.ENSMUSP00000002303,10090.ENSMUSP00000003038,10090.ENSMUSP00000003451,10090.ENSMUSP00000003550,10090.ENSMUSP00000004326,10090.ENSMUSP00000004990,10090.ENSMUSP00000005066,10090.ENSMUSP00000006467,10090.ENSMUSP00000007959,10090.ENSMUSP00000015137,10090.ENSMUSP00000017881,10090.ENSMUSP00000018437,10090.ENSMUSP00000020204…	Rdx,Efnb2,Tubb6,Rhoc,Ap2a2,Rnd1,Ncstn,Plxna3,Mapk14,Map2k1,Arpc2,Rhoa,Limk1,Mmp9,Pfn1,Ntn4,Egfr,Grb2,Shc3,Dpysl2,Gfra2,Pak2,Robo1,Dpysl3,Gfra1,St8sia2,Unc5a,Dok5,Nras,Efna3,Sdcbp,Tln1,Sema3a,Cdk5,Wasl,Ret,Tuba8,Pak1,Col4a1,Vav3,Irs2,Arhgef11,Rras,Sema7a,Rps6ka5,Siah1a,Psenen,Nrtn,Gpc1,Epha10,Tuba1c,Mapk3,Erbb2,Cdc42,Dscam,Pik3r1,Tubb2a,Grin2b,Vav2,Ezr,Dnm3,Epha3,Epha6,Slit3,Sos1,Sema5a,Tubb3,Actg…	4.46e-14	3.61e-11	Axon guidance	38.8489
Keyword	KW-0965	221	785	10090	10090.ENSMUSP00000000122,10090.ENSMUSP00000000199,10090.ENSMUSP00000000572,10090.ENSMUSP00000000641,10090.ENSMUSP00000001319,10090.ENSMUSP00000001548,10090.ENSMUSP00000001592,10090.ENSMUSP00000002848,10090.ENSMUSP00000002889,10090.ENSMUSP00000003971,10090.ENSMUSP00000005234,10090.ENSMUSP00000005509,10090.ENSMUSP00000006467,10090.ENSMUSP00000007130,10090.ENSMUSP00000007236,10090.ENSMUSP00000007757…	Ngfr,Ncs1,Gabra2,Sema4f,Efnb2,Itga3,Jup,Grin2d,Flii,Lin7b,Wdr1,Stx1a,Arpc2,Ctnnb1,Syngr3,Tgfbr1,Syn2,Syngr1,Cacng2,Atp2b1,Slc6a4,Cyp46a1,Vcl,Adcy8,Sharpin,Pvrl3,Klhl24,Cxadr,Faim2,Sympk,Ache,Vapa,Gabbr1,Cnih2,Slc1a1,Limd1,Farp1,Mkln1,Gria4,Cops5,Arl8a,Fam129b,Snap25,Snph,Fabp5,Glrb,Cpne3,Sdcbp,Epb4.1l4b,Tln1,Pdpn,Grik3,Cdk5,Gabrd,Gabrg1,Rufy3,Fscn1,Sspn,Slc17a6,Fchsd2,Pak1,Ilk,Atp6ap2,Gpm6a,Cbln1…	5.97e-14	5.42e-12	Cell junction	28.1529
COMPARTMENTS	GOCC:0030425	158	495	10090	10090.ENSMUSP00000000193,10090.ENSMUSP00000000199,10090.ENSMUSP00000000572,10090.ENSMUSP00000002708,10090.ENSMUSP00000005066,10090.ENSMUSP00000006467,10090.ENSMUSP00000007130,10090.ENSMUSP00000007959,10090.ENSMUSP00000018909,10090.ENSMUSP00000019577,10090.ENSMUSP00000020640,10090.ENSMUSP00000021684,10090.ENSMUSP00000021880,10090.ENSMUSP00000022013,10090.ENSMUSP00000022212,10090.ENSMUSP00000022629…	Ccl2,Ncs1,Gabra2,Shh,Map2k1,Arpc2,Ctnnb1,Rhoa,Fxr2,Gipc1,Gnb2l1,Cyp46a1,Ctla2a,Adcy2,Plk2,Dpysl2,Klhl1,Jph4,Adcy8,Pvrl3,P2rx6,Sod1,Asic1,Ache,Syt4,Gabbr1,Fas,Cnih2,Apba1,Slc1a1,Inpp5a,Farp1,Gria4,Uhmk1,Kif5c,Anxa5,Prss12,Cnn3,Calb1,Ppt1,Ncdn,Grik3,Sema3a,Rheb,Cdk5,Gabrd,Nsg1,Rufy3,Ret,Gabarapl1,Pak1,Stx4a,Ilk,Fgf13,Pvrl1,Rasgrf1,Snx1,Bsn,Tanc1,Clstn1,Grm1,Cplx1,Ppp1ca,Hnrnpk,Prkar2b,Map2k4,Kcna2,…	8.1e-14	7.02e-12	Dendrite	31.9192
COMPARTMENTS	GOCC:0097447	158	496	10090	10090.ENSMUSP00000000193,10090.ENSMUSP00000000199,10090.ENSMUSP00000000572,10090.ENSMUSP00000002708,10090.ENSMUSP00000005066,10090.ENSMUSP00000006467,10090.ENSMUSP00000007130,10090.ENSMUSP00000007959,10090.ENSMUSP00000018909,10090.ENSMUSP00000019577,10090.ENSMUSP00000020640,10090.ENSMUSP00000021684,10090.ENSMUSP00000021880,10090.ENSMUSP00000022013,10090.ENSMUSP00000022212,10090.ENSMUSP00000022629…	Ccl2,Ncs1,Gabra2,Shh,Map2k1,Arpc2,Ctnnb1,Rhoa,Fxr2,Gipc1,Gnb2l1,Cyp46a1,Ctla2a,Adcy2,Plk2,Dpysl2,Klhl1,Jph4,Adcy8,Pvrl3,P2rx6,Sod1,Asic1,Ache,Syt4,Gabbr1,Fas,Cnih2,Apba1,Slc1a1,Inpp5a,Farp1,Gria4,Uhmk1,Kif5c,Anxa5,Prss12,Cnn3,Calb1,Ppt1,Ncdn,Grik3,Sema3a,Rheb,Cdk5,Gabrd,Nsg1,Rufy3,Ret,Gabarapl1,Pak1,Stx4a,Ilk,Fgf13,Pvrl1,Rasgrf1,Snx1,Bsn,Tanc1,Clstn1,Grm1,Cplx1,Ppp1ca,Hnrnpk,Prkar2b,Map2k4,Kcna2,…	9.28e-14	7.73e-12	Dendritic tree	31.8548
Keyword	KW-0770	148	455	10090	10090.ENSMUSP00000000122,10090.ENSMUSP00000000199,10090.ENSMUSP00000000572,10090.ENSMUSP00000000641,10090.ENSMUSP00000002848,10090.ENSMUSP00000003971,10090.ENSMUSP00000005509,10090.ENSMUSP00000006467,10090.ENSMUSP00000007130,10090.ENSMUSP00000007236,10090.ENSMUSP00000009538,10090.ENSMUSP00000009727,10090.ENSMUSP00000019290,10090.ENSMUSP00000020107,10090.ENSMUSP00000021195,10090.ENSMUSP00000021684…	Ngfr,Ncs1,Gabra2,Sema4f,Grin2d,Lin7b,Stx1a,Arpc2,Ctnnb1,Syngr3,Syn2,Syngr1,Cacng2,Atp2b1,Slc6a4,Cyp46a1,Adcy8,Sharpin,Pvrl3,Faim2,Ache,Gabbr1,Cnih2,Slc1a1,Farp1,Mkln1,Gria4,Cops5,Arl8a,Snap25,Snph,Fabp5,Glrb,Grik3,Cdk5,Gabrd,Gabrg1,Sspn,Slc17a6,Atp6ap2,Gpm6a,Cbln1,Pvrl1,Bsn,Scamp5,Tanc1,Atcay,Clstn1,Cplx1,Sdk2,Brsk1,Kcna2,Zdhhc17,Lrp1,Pacsin1,Palmd,Pcdh8,Rims4,Kcnk1,Igsf21,Lgi3,Htr2a,Cops4,Grin3b…	1.51e-13	1.17e-11	Synapse	32.5275
Component	GO:0032279	140	420	10090	10090.ENSMUSP00000000122,10090.ENSMUSP00000000199,10090.ENSMUSP00000000543,10090.ENSMUSP00000000641,10090.ENSMUSP00000000939,10090.ENSMUSP00000001319,10090.ENSMUSP00000002848,10090.ENSMUSP00000003971,10090.ENSMUSP00000005066,10090.ENSMUSP00000005077,10090.ENSMUSP00000005509,10090.ENSMUSP00000007130,10090.ENSMUSP00000008812,10090.ENSMUSP00000009538,10090.ENSMUSP00000018909,10090.ENSMUSP00000019290…	Ngfr,Ncs1,Grasp,Sema4f,Hip1r,Efnb2,Grin2d,Lin7b,Map2k1,Hspb1,Stx1a,Ctnnb1,Rps18,Syn2,Fxr2,Cacng2,Adcy1,Dynll2,Cap2,Nefm,Ywhaz,Adcy8,Sharpin,Pvrl3,P2rx6,Pak2,Slc4a8,Cnih2,Slc1a1,Gpr123,Gria4,Fabp5,Cnn3,Grik3,Rheb,Cdk5,Rpl6,Add2,Camk1,Rps3,Pak1,Egln1,Snx1,Myd88,Bsn,Tanc1,Clstn1,Grm1,Hnrnpk,Ptprf,Atp1a1,Zdhhc2,Pacsin1,Akap9,Dagla,Grin3b,Oprd1,D3Bwg0562e,Eps8,Lrrc4b,Flrt3,Prr12,Sigmar1,Abhd17b,Pura,A…	1.54e-13	7.07e-12	Asymmetric synapse	33.3333
Component	GO:0150034	135	399	10090	10090.ENSMUSP00000000122,10090.ENSMUSP00000000193,10090.ENSMUSP00000000199,10090.ENSMUSP00000001548,10090.ENSMUSP00000003754,10090.ENSMUSP00000004673,10090.ENSMUSP00000006467,10090.ENSMUSP00000009550,10090.ENSMUSP00000015137,10090.ENSMUSP00000016400,10090.ENSMUSP00000017610,10090.ENSMUSP00000018651,10090.ENSMUSP00000018880,10090.ENSMUSP00000018909,10090.ENSMUSP00000020040,10090.ENSMUSP00000020420…	Ngfr,Ccl2,Ncs1,Itga3,Calb2,Ndrg2,Arpc2,Elk1,Limk1,Ctsz,Timp2,Trpv2,Ndel1,Fxr2,Nts,Ap3d1,Kif3c,Clu,Dpysl2,Nefl,Cxadr,Slc4a8,Dpysl3,Ighmbp2,Slc1a1,Dctn2,Gria4,Kif5c,Snap25,Stmn2,Anxa5,Prss12,Ptbp2,Calb1,Pink1,Grik3,Cdk5,Rufy3,Fscn1,Npy,Fkbp4,Pak1,Ilk,Fgf13,Gpm6a,Pvrl1,Rasgrf1,Tanc1,Gdpd5,Atcay,Copg2,Cplx1,Hnrnpk,Ptprf,Exoc3,Brsk1,Kcna2,Cbl,Zfp804a,Sncb,Dicer1,Lrp1,Pacsin1,Inpp5j,Bzrap1,Trpc5,Oprd1,…	1.72e-13	7.69e-12	Distal axon	33.8346
Process	GO:0031346	152	474	10090	10090.ENSMUSP00000000109,10090.ENSMUSP00000000122,10090.ENSMUSP00000000127,10090.ENSMUSP00000001347,10090.ENSMUSP00000001548,10090.ENSMUSP00000002487,10090.ENSMUSP00000004326,10090.ENSMUSP00000004646,10090.ENSMUSP00000005066,10090.ENSMUSP00000005077,10090.ENSMUSP00000006467,10090.ENSMUSP00000007757,10090.ENSMUSP00000008878,10090.ENSMUSP00000008893,10090.ENSMUSP00000009003,10090.ENSMUSP00000009143…	Cntn1,Ngfr,Wnt3,Rnd2,Itga3,Braf,Plxna3,Coro1c,Map2k1,Hspb1,Arpc2,Tgfbr1,Gprc5b,Coro1b,Rala,Bmp7,Dynll1,Limk1,Pfn1,Trpv2,Ndel1,Snx3,Kif3c,Nme2,F2rl1,Nefl,Twf1,Rrn3,Robo1,Adamts1,Ache,Rhoq,Syt4,Dpysl3,Ehd1,Ppp2r5b,Ankrd1,Itga6,Stmn2,Serpini1,Wrap73,Rufy3,Scarb2,Fscn1,Wasl,Ret,Lrp6,Camk1,Pak1,Ilk,Dock11,Gpm6a,Ist1,Cx3cl1,Tmem30a,Camk1d,Tox,Enc1,Hnrnpk,Ptprf,Fig4,Mapk6,Ss18l1,Zfp804a,Sema7a,Eef1a1,Lr…	1.79e-13	2.59e-11	Positive regulation of cell projection organization	32.0675
Component	GO:0098984	145	446	10090	10090.ENSMUSP00000000122,10090.ENSMUSP00000000199,10090.ENSMUSP00000000543,10090.ENSMUSP00000000641,10090.ENSMUSP00000000939,10090.ENSMUSP00000001319,10090.ENSMUSP00000002848,10090.ENSMUSP00000003971,10090.ENSMUSP00000005066,10090.ENSMUSP00000005077,10090.ENSMUSP00000005509,10090.ENSMUSP00000007130,10090.ENSMUSP00000008812,10090.ENSMUSP00000009538,10090.ENSMUSP00000018909,10090.ENSMUSP00000019290…	Ngfr,Ncs1,Grasp,Sema4f,Hip1r,Efnb2,Grin2d,Lin7b,Map2k1,Hspb1,Stx1a,Ctnnb1,Rps18,Syn2,Fxr2,Cacng2,Adcy1,Dynll2,Cap2,Nefm,Rnf19a,Ywhaz,Adcy8,Sharpin,Pvrl3,P2rx6,Pak2,Slc4a8,Cnih2,Slc1a1,Gpr123,Gria4,Fabp5,Cnn3,Calb1,Grik3,Rheb,Cdk5,Rpl6,Add2,Camk1,Rps3,Pak1,Egln1,Pvrl1,Snx1,Myd88,Bsn,Tanc1,Clstn1,Grm1,Hnrnpk,Ptprf,Atp1a1,Zdhhc2,Pacsin1,Akap9,Dagla,Grin3b,Oprd1,D3Bwg0562e,Eps8,Lrrc4b,Flrt3,Prr12,Sig…	2.75e-13	1.17e-11	Neuron to neuron synapse	32.5112
Process	GO:0099177	161	522	10090	10090.ENSMUSP00000000122,10090.ENSMUSP00000000193,10090.ENSMUSP00000000199,10090.ENSMUSP00000002100,10090.ENSMUSP00000002487,10090.ENSMUSP00000002848,10090.ENSMUSP00000003442,10090.ENSMUSP00000003550,10090.ENSMUSP00000003754,10090.ENSMUSP00000005509,10090.ENSMUSP00000006181,10090.ENSMUSP00000009727,10090.ENSMUSP00000017881,10090.ENSMUSP00000018644,10090.ENSMUSP00000019290,10090.ENSMUSP00000019577…	Ngfr,Ccl2,Ncs1,Tmem25,Braf,Grin2d,Cacnb3,Ncstn,Calb2,Stx1a,Napa,Syngr1,Mmp9,Adora2b,Cacng2,Gipc1,Eif4ebp2,Egfr,Adcy1,Slc6a4,Cyp46a1,Plk2,Jph4,Rnf19a,Adcy8,Asic1,Slc4a8,Syt4,Gabbr1,Cnih2,Apba1,Jph3,Nptx1,Gria4,Snap25,Napb,Fabp5,Slc7a11,Gucy1b3,Eif4e,Calb1,Pink1,Ncdn,Grik3,Cdk5,Cd38,Nsg1,Slc6a6,Pak1,Stx4a,Cckbr,Plat,Star,Cbln1,Egln1,Rasgrf1,Clstn1,Pde4a,Grm1,Cplx1,Hnrnpk,Brsk1,Prkar2b,Egr2,Zdhhc2,S…	4.81e-13	6.52e-11	Regulation of trans-synaptic signaling	30.8429
Process	GO:0000902	207	739	10090	10090.ENSMUSP00000000122,10090.ENSMUSP00000000127,10090.ENSMUSP00000000641,10090.ENSMUSP00000001319,10090.ENSMUSP00000002708,10090.ENSMUSP00000004326,10090.ENSMUSP00000004920,10090.ENSMUSP00000004968,10090.ENSMUSP00000004990,10090.ENSMUSP00000005066,10090.ENSMUSP00000005234,10090.ENSMUSP00000007130,10090.ENSMUSP00000007959,10090.ENSMUSP00000009143,10090.ENSMUSP00000015791,10090.ENSMUSP00000016315…	Ngfr,Wnt3,Sema4f,Efnb2,Shh,Plxna3,Ulk2,Plod3,Mapk14,Map2k1,Wdr1,Ctnnb1,Rhoa,Bmp7,Lama5,Lamb3,Myh9,Top2b,Etv4,Ndel1,Ntn4,Egfr,Adcy1,Fam84a,Rab10,Slc9a3r1,Cap2,Cdhr1,Vcl,Lats2,Clu,Dpysl2,Nefl,Rb1,Vdr,Bcl6,Alcam,Robo1,Sod1,Impact,Smad4,Slit1,Hexa,Farp1,Nptx1,Hprt,Unc5a,Lhx4,Kif5c,Lef1,Efna3,Nr4a3,Pdpn,Sema3c,Stmn1,Sema3a,Cdk5,Draxin,Sema3d,Uchl1,Vps33a,Wasl,Lrp6,Pak1,Ilk,Wee1,Gpm6a,Sfrp1,Cdh5,Pvrl1,…	5.77e-13	7.67e-11	Cell morphogenesis	28.0108
Process	GO:0050804	160	521	10090	10090.ENSMUSP00000000122,10090.ENSMUSP00000000193,10090.ENSMUSP00000000199,10090.ENSMUSP00000002100,10090.ENSMUSP00000002487,10090.ENSMUSP00000002848,10090.ENSMUSP00000003442,10090.ENSMUSP00000003550,10090.ENSMUSP00000003754,10090.ENSMUSP00000005509,10090.ENSMUSP00000006181,10090.ENSMUSP00000009727,10090.ENSMUSP00000017881,10090.ENSMUSP00000018644,10090.ENSMUSP00000019290,10090.ENSMUSP00000019577…	Ngfr,Ccl2,Ncs1,Tmem25,Braf,Grin2d,Cacnb3,Ncstn,Calb2,Stx1a,Napa,Syngr1,Mmp9,Adora2b,Cacng2,Gipc1,Eif4ebp2,Egfr,Adcy1,Slc6a4,Cyp46a1,Plk2,Jph4,Rnf19a,Adcy8,Asic1,Slc4a8,Syt4,Gabbr1,Cnih2,Apba1,Jph3,Nptx1,Gria4,Snap25,Napb,Slc7a11,Gucy1b3,Eif4e,Calb1,Pink1,Ncdn,Grik3,Cdk5,Cd38,Nsg1,Slc6a6,Pak1,Stx4a,Cckbr,Plat,Star,Cbln1,Egln1,Rasgrf1,Clstn1,Pde4a,Grm1,Cplx1,Hnrnpk,Brsk1,Prkar2b,Egr2,Zdhhc2,Syde1,P…	7.57e-13	9.76e-11	Modulation of chemical synaptic transmission	30.7102
Component	GO:0014069	136	414	10090	10090.ENSMUSP00000000122,10090.ENSMUSP00000000199,10090.ENSMUSP00000000543,10090.ENSMUSP00000000641,10090.ENSMUSP00000000939,10090.ENSMUSP00000001319,10090.ENSMUSP00000002848,10090.ENSMUSP00000003971,10090.ENSMUSP00000005066,10090.ENSMUSP00000005077,10090.ENSMUSP00000005509,10090.ENSMUSP00000007130,10090.ENSMUSP00000008812,10090.ENSMUSP00000009538,10090.ENSMUSP00000018909,10090.ENSMUSP00000019290…	Ngfr,Ncs1,Grasp,Sema4f,Hip1r,Efnb2,Grin2d,Lin7b,Map2k1,Hspb1,Stx1a,Ctnnb1,Rps18,Syn2,Fxr2,Cacng2,Adcy1,Dynll2,Cap2,Nefm,Ywhaz,Adcy8,Sharpin,Pvrl3,P2rx6,Pak2,Cnih2,Gpr123,Gria4,Fabp5,Cnn3,Grik3,Rheb,Cdk5,Rpl6,Add2,Camk1,Rps3,Pak1,Egln1,Snx1,Myd88,Bsn,Tanc1,Clstn1,Grm1,Hnrnpk,Ptprf,Atp1a1,Zdhhc2,Pacsin1,Akap9,Dagla,Grin3b,Oprd1,D3Bwg0562e,Eps8,Lrrc4b,Flrt3,Prr12,Sigmar1,Abhd17b,Pura,Adra2c,Camk2n1,…	8.22e-13	3.4e-11	Postsynaptic density	32.8502
Component	GO:0005768	231	862	10090	10090.ENSMUSP00000000305,10090.ENSMUSP00000001347,10090.ENSMUSP00000001652,10090.ENSMUSP00000001963,10090.ENSMUSP00000002100,10090.ENSMUSP00000003550,10090.ENSMUSP00000003677,10090.ENSMUSP00000004173,10090.ENSMUSP00000004646,10090.ENSMUSP00000005066,10090.ENSMUSP00000005256,10090.ENSMUSP00000005798,10090.ENSMUSP00000005952,10090.ENSMUSP00000006467,10090.ENSMUSP00000007757,10090.ENSMUSP00000007959…	Tpd52l1,Rnd2,Bdkrb2,Ace,Tmem25,Ncstn,Rnf215,Cdip1,Coro1c,Map2k1,Ndrg1,Snx6,Slc30a4,Arpc2,Tgfbr1,Rhoa,Zfyve20,Rab11fip4,Atp6v1e1,Snx3,Cd164,Uhrf1bp1l,Avpr1a,Egfr,Ap3d1,Nsg2,Rufy1,Laptm4a,Rab10,Grb2,Slc6a4,Stx8,Gosr2,Rab15,F2rl1,Scamp1,Tfrc,Dscr3,Ifnar1,Abcg1,Ehd3,Mic1,Ehd1,Slc1a1,Prdx3,Gfra1,Ifitm3,Tmem192,St8sia2,Ptp4a1,Abcb6,Arl8a,Rab29,Stx6,Grb14,Snap25,Ehd4,Sppl2a,Cst3,Stmn2,Snx16,Ptpn1,Lrat,L…	1.1e-12	4.46e-11	Endosome	26.7981
Process	GO:1903827	171	576	10090	10090.ENSMUSP00000000058,10090.ENSMUSP00000000122,10090.ENSMUSP00000000193,10090.ENSMUSP00000000543,10090.ENSMUSP00000000590,10090.ENSMUSP00000001319,10090.ENSMUSP00000001452,10090.ENSMUSP00000001548,10090.ENSMUSP00000001592,10090.ENSMUSP00000001780,10090.ENSMUSP00000002029,10090.ENSMUSP00000002708,10090.ENSMUSP00000003442,10090.ENSMUSP00000004990,10090.ENSMUSP00000005066,10090.ENSMUSP00000006467…	Cav2,Ngfr,Ccl2,Grasp,Rdx,Efnb2,Cct3,Itga3,Jup,Akt1,Emd,Shh,Cacnb3,Mapk14,Map2k1,Arpc2,Ctnnb1,Glis2,Nol3,Ndel1,Cacng2,Snx3,Egfr,Gnb2l1,Srebf1,Dnajc27,Stx8,Ppm1a,Rb1,Cct5,Angpt1,Mief1,Tfrc,Rhoq,Pmaip1,Maged1,Cct8,Ppm1f,Rassf5,Rab29,Stx6,Parp1,Uhmk1,Gsn,Stom,Ptpn1,Slc7a11,Lmna,Ubxn2b,Txn1,Prkaa2,Leprot,Pink1,Cdk5,Tomm7,Rufy3,Cct6a,Camk1,Tnfrsf1a,Ipo5,Pak1,Stx4a,Nucb1,Zdhhc7,Pin1,Ptpn9,Tmem30a,Stac,F…	1.29e-12	1.63e-10	Regulation of cellular protein localization	29.6875
Component	GO:0099572	143	449	10090	10090.ENSMUSP00000000122,10090.ENSMUSP00000000199,10090.ENSMUSP00000000543,10090.ENSMUSP00000000572,10090.ENSMUSP00000000641,10090.ENSMUSP00000000939,10090.ENSMUSP00000001319,10090.ENSMUSP00000002848,10090.ENSMUSP00000003971,10090.ENSMUSP00000005066,10090.ENSMUSP00000005077,10090.ENSMUSP00000005509,10090.ENSMUSP00000007130,10090.ENSMUSP00000008812,10090.ENSMUSP00000009538,10090.ENSMUSP00000018909…	Ngfr,Ncs1,Grasp,Gabra2,Sema4f,Hip1r,Efnb2,Grin2d,Lin7b,Map2k1,Hspb1,Stx1a,Ctnnb1,Rps18,Syn2,Fxr2,Cacng2,Adcy1,Dynll2,Cap2,Nefm,Ywhaz,Adcy8,Sharpin,Pvrl3,P2rx6,Pak2,Cnih2,Gpr123,Gria4,Fabp5,Cnn3,Grik3,Rheb,Cdk5,Rpl6,Add2,Camk1,Rps3,Pak1,Egln1,Snx1,Myd88,Bsn,Tanc1,Clstn1,Grm1,Htr5a,Hnrnpk,Ptprf,Atp1a1,Zdhhc2,Pacsin1,Akap9,Dagla,Grin3b,Oprd1,D3Bwg0562e,Eps8,Lrrc4b,Flrt3,Prr12,Sigmar1,Abhd17b,Pura,Ad…	1.43e-12	5.62e-11	Postsynaptic specialization	31.8486
Process	GO:0010721	128	384	10090	10090.ENSMUSP00000000122,10090.ENSMUSP00000000127,10090.ENSMUSP00000000579,10090.ENSMUSP00000000641,10090.ENSMUSP00000001319,10090.ENSMUSP00000002708,10090.ENSMUSP00000004326,10090.ENSMUSP00000004327,10090.ENSMUSP00000004646,10090.ENSMUSP00000004920,10090.ENSMUSP00000007130,10090.ENSMUSP00000007959,10090.ENSMUSP00000009143,10090.ENSMUSP00000015858,10090.ENSMUSP00000016400,10090.ENSMUSP00000019911…	Ngfr,Wnt3,Sox9,Sema4f,Efnb2,Shh,Plxna3,G6pdx,Coro1c,Ulk2,Ctnnb1,Rhoa,Bmp7,Cers2,Ctsz,Hdac2,Ascl1,Kremen1,Slc6a4,Fam101b,Plk2,Syt4,Dpysl3,Smad4,Fas,Slit1,Ctdsp1,Itm2c,Rab29,Vim,Grb14,Frzb,Jag1,Stmn2,Eif4e,Npr2,Sema3c,Sema3a,Cdk5,Draxin,Sema3d,Cd38,Rufy3,Dtx1,Fkbp4,Xylt1,Pak1,Fgf13,Ldlr,Ptpn9,Isl2,Gak,Tspo,Hey1,Ptchd2,BC027231,Sema7a,Tmem98,Dicer1,Lrp1,Dusp10,Inpp5f,Mycn,AF529169,Inpp5j,Mylip,Tlx3,…	1.71e-12	2.12e-10	Negative regulation of cell development	33.3333
COMPARTMENTS	GOCC:0150034	117	337	10090	10090.ENSMUSP00000000193,10090.ENSMUSP00000000199,10090.ENSMUSP00000001548,10090.ENSMUSP00000003754,10090.ENSMUSP00000006467,10090.ENSMUSP00000015137,10090.ENSMUSP00000017610,10090.ENSMUSP00000018651,10090.ENSMUSP00000018880,10090.ENSMUSP00000020040,10090.ENSMUSP00000020420,10090.ENSMUSP00000020999,10090.ENSMUSP00000022616,10090.ENSMUSP00000022629,10090.ENSMUSP00000022639,10090.ENSMUSP00000023572…	Ccl2,Ncs1,Itga3,Calb2,Arpc2,Limk1,Timp2,Trpv2,Ndel1,Nts,Ap3d1,Kif3c,Clu,Dpysl2,Nefl,Cxadr,Slc4a8,Dpysl3,Ighmbp2,Slc1a1,Dctn2,Gria4,Kif5c,Snap25,Stmn2,Anxa5,Prss12,Ptbp2,Calb1,Pink1,Grik3,Cdk5,Rufy3,Fscn1,Npy,Fkbp4,Pak1,Ilk,Fgf13,Gpm6a,Pvrl1,Rasgrf1,Bsn,Tanc1,Copg2,Cplx1,Hnrnpk,Ptprf,Brsk1,Kcna2,Cbl,Zfp804a,Sncb,Dicer1,Lrp1,Pacsin1,Inpp5j,Bzrap1,Surf6,Trpc5,Oprd1,Flrt3,Basp1,Nrsn1,Kcna1,Dscam,Kcnb…	1.84e-12	1.28e-10	Distal axon	34.7181
Process	GO:0010976	123	366	10090	10090.ENSMUSP00000000109,10090.ENSMUSP00000000122,10090.ENSMUSP00000000127,10090.ENSMUSP00000001347,10090.ENSMUSP00000001548,10090.ENSMUSP00000002487,10090.ENSMUSP00000004326,10090.ENSMUSP00000005066,10090.ENSMUSP00000005077,10090.ENSMUSP00000008878,10090.ENSMUSP00000009143,10090.ENSMUSP00000015137,10090.ENSMUSP00000018651,10090.ENSMUSP00000018880,10090.ENSMUSP00000019939,10090.ENSMUSP00000020999…	Cntn1,Ngfr,Wnt3,Rnd2,Itga3,Braf,Plxna3,Map2k1,Hspb1,Gprc5b,Bmp7,Limk1,Trpv2,Ndel1,Snx3,Kif3c,Nme2,Nefl,Twf1,Rrn3,Robo1,Adamts1,Ache,Syt4,Dpysl3,Ehd1,Ppp2r5b,Ankrd1,Itga6,Stmn2,Serpini1,Rufy3,Scarb2,Ret,Lrp6,Camk1,Pak1,Ilk,Ist1,Cx3cl1,Tmem30a,Camk1d,Tox,Enc1,Hnrnpk,Ptprf,Fig4,Mapk6,Ss18l1,Zfp804a,Sema7a,Eef1a1,Lrp1,Pacsin1,Fbxw8,Map3k13,Trpc5,Plxnb2,Dscam,Fbxo31,Fzd1,Nlgn3,Epha3,Ep300,Adcyap1,Sema…	2.98e-12	3.62e-10	Positive regulation of neuron projection development	33.6066
Component	GO:0048471	211	775	10090	10090.ENSMUSP00000000058,10090.ENSMUSP00000000193,10090.ENSMUSP00000000199,10090.ENSMUSP00000000305,10090.ENSMUSP00000000543,10090.ENSMUSP00000000939,10090.ENSMUSP00000001548,10090.ENSMUSP00000001950,10090.ENSMUSP00000002808,10090.ENSMUSP00000004206,10090.ENSMUSP00000004673,10090.ENSMUSP00000005066,10090.ENSMUSP00000005256,10090.ENSMUSP00000006235,10090.ENSMUSP00000006828,10090.ENSMUSP00000007130…	Cav2,Ccl2,Ncs1,Tpd52l1,Grasp,Hip1r,Itga3,Tollip,Prkra,Eif3g,Ndrg2,Map2k1,Ndrg1,Ctsb,Aplp1,Ctnnb1,Clic1,Ubqln4,Coro1b,Cabp7,Csf1,Limk1,Rab11fip4,Ywhab,Gabarap,Wwc1,Ctgf,Egfr,Ccng1,Gnb2l1,Rab10,Slc9a3r1,Cpd,Nme2,Stx8,Chga,Angel1,Wrnip1,Clu,Cln5,Ywhaz,Twf1,Vdr,Pak2,Tfrc,Ache,Ehd3,Eif2ak2,Vapa,Syt4,Osbp,Ehd1,Fas,Ighmbp2,Pacs1,Apba1,Tmem192,Cops5,Ppm1f,Itm2c,Rab29,Stx6,Vim,Gsn,Stom,Snap25,Ehd4,Cst3,St…	3.24e-12	1.19e-10	Perinuclear region of cytoplasm	27.2258
Component	GO:0098793	182	636	10090	10090.ENSMUSP00000000109,10090.ENSMUSP00000000193,10090.ENSMUSP00000000199,10090.ENSMUSP00000000572,10090.ENSMUSP00000001319,10090.ENSMUSP00000002708,10090.ENSMUSP00000003038,10090.ENSMUSP00000003550,10090.ENSMUSP00000003754,10090.ENSMUSP00000003971,10090.ENSMUSP00000005509,10090.ENSMUSP00000006181,10090.ENSMUSP00000006467,10090.ENSMUSP00000007130,10090.ENSMUSP00000007236,10090.ENSMUSP00000009538…	Cntn1,Ccl2,Ncs1,Gabra2,Efnb2,Shh,Ap2a2,Ncstn,Calb2,Lin7b,Stx1a,Napa,Arpc2,Ctnnb1,Syngr3,Syn2,Elk1,Syngr1,Pfn1,Ndel1,Fxr2,Gipc1,Nts,Atp2b1,Ap3d1,Kif3c,Rab10,Slc6a4,Rab15,Cyp46a1,Scamp1,Vdac2,Dpysl2,Nefm,Nefl,Adcy8,Slc4a8,Ache,Syt4,Gabbr1,Apba1,Slc1a1,Gria4,Cops5,Cln8,Stx6,Snap25,Napb,Snph,Anxa5,Sec22b,Prss12,Gucy1b3,Calb1,Slc2a1,Ppt1,Grik3,Stx12,Cdk5,Rab35,Npy,Slc2a3,Slc17a6,Rab6a,Pak1,Stx4a,Ilk,G…	3.39e-12	1.22e-10	Presynapse	28.6164
Process	GO:0120039	149	484	10090	10090.ENSMUSP00000000122,10090.ENSMUSP00000000127,10090.ENSMUSP00000000641,10090.ENSMUSP00000001319,10090.ENSMUSP00000002708,10090.ENSMUSP00000004326,10090.ENSMUSP00000004920,10090.ENSMUSP00000005066,10090.ENSMUSP00000007130,10090.ENSMUSP00000007959,10090.ENSMUSP00000009143,10090.ENSMUSP00000017629,10090.ENSMUSP00000017868,10090.ENSMUSP00000018880,10090.ENSMUSP00000020329,10090.ENSMUSP00000020706…	Ngfr,Wnt3,Sema4f,Efnb2,Shh,Plxna3,Ulk2,Map2k1,Ctnnb1,Rhoa,Bmp7,Top2b,Etv4,Ndel1,Egfr,Adcy1,Rab10,Vcl,Clu,Dpysl2,Nefl,Alcam,Robo1,Impact,Smad4,Slit1,Farp1,Nptx1,Hprt,Unc5a,Lhx4,Kif5c,Efna3,Nr4a3,Sema3c,Stmn1,Sema3a,Cdk5,Draxin,Sema3d,Uchl1,Wasl,Pak1,Ilk,Wee1,Gpm6a,Pvrl1,Isl2,Snx1,Snx2,Brsk1,Egr2,Sema7a,Dicer1,Lama1,Lrp1,Pacsin1,Ndn,Gbx2,Epha10,Plxnb2,D3Bwg0562e,Flrt3,Erbb2,Cdc42,Dscam,Nog,Flrt2,Ne…	4.04e-12	4.74e-10	Plasma membrane bounded cell projection morphogenesis	30.7851
Process	GO:0048858	150	490	10090	10090.ENSMUSP00000000122,10090.ENSMUSP00000000127,10090.ENSMUSP00000000641,10090.ENSMUSP00000001319,10090.ENSMUSP00000002708,10090.ENSMUSP00000004326,10090.ENSMUSP00000004920,10090.ENSMUSP00000005066,10090.ENSMUSP00000007130,10090.ENSMUSP00000007959,10090.ENSMUSP00000009143,10090.ENSMUSP00000017629,10090.ENSMUSP00000017868,10090.ENSMUSP00000018880,10090.ENSMUSP00000020329,10090.ENSMUSP00000020706…	Ngfr,Wnt3,Sema4f,Efnb2,Shh,Plxna3,Ulk2,Map2k1,Ctnnb1,Rhoa,Bmp7,Top2b,Etv4,Ndel1,Egfr,Adcy1,Rab10,Vcl,Clu,Dpysl2,Nefl,Alcam,Robo1,Impact,Smad4,Slit1,Farp1,Nptx1,Hprt,Unc5a,Lhx4,Kif5c,Efna3,Nr4a3,Sema3c,Stmn1,Sema3a,Cdk5,Draxin,Sema3d,Uchl1,Wasl,Pak1,Ilk,Wee1,Gpm6a,Pvrl1,Isl2,Snx1,Snx2,Brsk1,Egr2,Sema7a,Dicer1,Lama1,Lrp1,Pacsin1,Ndn,Gbx2,Epha10,Plxnb2,D3Bwg0562e,Flrt3,Erbb2,Cdc42,Dscam,Nog,Flrt2,Ne…	4.85e-12	5.64e-10	Cell projection morphogenesis	30.6122
Process	GO:0051961	122	365	10090	10090.ENSMUSP00000000122,10090.ENSMUSP00000000127,10090.ENSMUSP00000000579,10090.ENSMUSP00000000641,10090.ENSMUSP00000001319,10090.ENSMUSP00000001562,10090.ENSMUSP00000002708,10090.ENSMUSP00000004326,10090.ENSMUSP00000004920,10090.ENSMUSP00000007130,10090.ENSMUSP00000007959,10090.ENSMUSP00000009143,10090.ENSMUSP00000015858,10090.ENSMUSP00000016400,10090.ENSMUSP00000019911,10090.ENSMUSP00000020243…	Ngfr,Wnt3,Sox9,Sema4f,Efnb2,Tulp3,Shh,Plxna3,Ulk2,Ctnnb1,Rhoa,Bmp7,Cers2,Ctsz,Hdac2,Ascl1,Kremen1,Slc6a4,Plk2,Tnfrsf21,Syt4,Dpysl3,Fas,Slit1,Ctdsp1,Itm2c,Rab29,Vim,Jag1,Stmn2,Eif4e,Sema3c,Sema3a,Cdk5,Draxin,Sema3d,Cd38,Rufy3,Dtx1,Lrp6,Fkbp4,Xylt1,Fgf13,Cbln1,Ldlr,Ptpn9,Isl2,Gak,Tspo,Hey1,Ptchd2,BC027231,Hnrnpk,Fig4,Sema7a,Tmem98,Dicer1,Lrp1,Dusp10,Inpp5f,Mycn,AF529169,Inpp5j,Mylip,Tlx3,Cpe,Trpc5,…	4.89e-12	5.64e-10	Negative regulation of nervous system development	33.4247
Component	GO:0030427	90	232	10090	10090.ENSMUSP00000000122,10090.ENSMUSP00000001548,10090.ENSMUSP00000004673,10090.ENSMUSP00000006467,10090.ENSMUSP00000015137,10090.ENSMUSP00000016400,10090.ENSMUSP00000017610,10090.ENSMUSP00000018651,10090.ENSMUSP00000018880,10090.ENSMUSP00000018909,10090.ENSMUSP00000020999,10090.ENSMUSP00000022616,10090.ENSMUSP00000022629,10090.ENSMUSP00000022639,10090.ENSMUSP00000023572,10090.ENSMUSP00000025379…	Ngfr,Itga3,Ndrg2,Arpc2,Limk1,Ctsz,Timp2,Trpv2,Ndel1,Fxr2,Kif3c,Clu,Dpysl2,Nefl,Cxadr,Dpysl3,Ighmbp2,Dctn2,Kif5c,Snap25,Stmn2,Ptbp2,Pink1,Cdk5,Rufy3,Fscn1,Fkbp4,Pak1,Fgf13,Gpm6a,Pvrl1,Rasgrf1,Gdpd5,Atcay,Copg2,Ptprf,Exoc3,Cbl,Zfp804a,Sncb,Dicer1,Lrp1,Inpp5j,Trpc5,Amfr,Eps8,Flrt3,Basp1,Nrsn1,Sigmar1,Dscam,Ptprs,Pi4k2a,Ywhae,Tubb3,Sirt2,Stmn4,Map2,Arpc5,Eno1,Cdkl5,Fry,Usp9x,Erc2,Kif5a,Stmn3,Cttn,Hap…	6.1e-12	2.15e-10	Site of polarized growth	38.7931
Component	GO:0005789	243	940	10090	10090.ENSMUSP00000000001,10090.ENSMUSP00000000895,10090.ENSMUSP00000001507,10090.ENSMUSP00000004381,10090.ENSMUSP00000004508,10090.ENSMUSP00000004968,10090.ENSMUSP00000005003,10090.ENSMUSP00000005651,10090.ENSMUSP00000006557,10090.ENSMUSP00000006853,10090.ENSMUSP00000008748,10090.ENSMUSP00000010807,10090.ENSMUSP00000014022,10090.ENSMUSP00000015011,10090.ENSMUSP00000015725,10090.ENSMUSP00000015858…	Gnai3,Necab3,Cyp51,Lpcat3,Tmed4,Plod3,Lbr,Por,Elovl1,P4htm,Ubqln4,Fads1,Rnf170,Surf4,Bnip1,Cers2,Pip4k2b,Slc35b4,Atp6ap1,Rnf145,Ikbip,Egfr,Srebf1,Rsad2,Rab10,Lrrc59,Gosr2,Sptlc2,Sgpp1,Tmx1,Cyp46a1,Ryr2,Lman2,Ptdss1,Hmgcr,Ero1l,Tkt,Jph4,Fam134b,Sqle,Lmf2,Cers5,Nus1,March5,Agpat4,Pkmyt1,Abcg1,Cyp1b1,Vapa,Pigf,Tap2,Dnajc18,Gabbr1,Fads2,Osbp,Tm7sf2,Cnih2,Cyp26a1,Scd3,Scd2,Jph3,Rdh5,Esyt1,Rdh10,Abcb6,…	6.19e-12	2.15e-10	Endoplasmic reticulum membrane	25.8511
Function	GO:0019900	213	792	10090	10090.ENSMUSP00000000058,10090.ENSMUSP00000000199,10090.ENSMUSP00000000299,10090.ENSMUSP00000000542,10090.ENSMUSP00000000579,10090.ENSMUSP00000001592,10090.ENSMUSP00000001780,10090.ENSMUSP00000001950,10090.ENSMUSP00000001963,10090.ENSMUSP00000002487,10090.ENSMUSP00000002808,10090.ENSMUSP00000003038,10090.ENSMUSP00000003442,10090.ENSMUSP00000003561,10090.ENSMUSP00000003964,10090.ENSMUSP00000004990…	Cav2,Ncs1,Itgb2,Acvrl1,Sox9,Jup,Akt1,Tollip,Ace,Braf,Prkra,Ap2a2,Cacnb3,Phyhip,Gys1,Mapk14,Map2k1,Hspb1,Cd44,Stx1a,Trap1,Ctnnb1,Rps18,Gprc5b,Ap1b1,Pgam1,Pea15a,Nol3,Fbxw5,Fnta,Mapkapk2,Top2b,Slc12a7,Wwc1,Egfr,Pfkl,Gnb2l1,Srebf1,Trib2,Map2k6,Grb2,Hif1a,Ryr2,Shc3,Rgcc,Dpysl2,Rb1,Spry2,Ywhaz,Angpt1,Pak2,Tfrc,Rhoq,Fas,Rela,Map4k2,Prdx3,Ankrd2,Dctn2,Casp1,Parp1,Vim,Grb14,Spred1,Mapre1,Ptpn1,Fam83d,Anx…	6.64e-12	1.53e-09	Kinase binding	26.8939
COMPARTMENTS	GOCC:0098984	111	320	10090	10090.ENSMUSP00000000122,10090.ENSMUSP00000000543,10090.ENSMUSP00000001319,10090.ENSMUSP00000002848,10090.ENSMUSP00000005077,10090.ENSMUSP00000005509,10090.ENSMUSP00000007130,10090.ENSMUSP00000009538,10090.ENSMUSP00000019290,10090.ENSMUSP00000020706,10090.ENSMUSP00000021802,10090.ENSMUSP00000022638,10090.ENSMUSP00000022890,10090.ENSMUSP00000022894,10090.ENSMUSP00000023007,10090.ENSMUSP00000023211…	Ngfr,Grasp,Efnb2,Grin2d,Hspb1,Stx1a,Ctnnb1,Syn2,Cacng2,Adcy1,Cap2,Nefm,Rnf19a,Ywhaz,Adcy8,Sharpin,Pvrl3,Slc4a8,Cnih2,Slc1a1,Gria4,Fabp5,Rheb,Cdk5,Add2,Pak1,Pvrl1,Snx1,Bsn,Tanc1,Clstn1,Grm1,Ptprf,Atp1a1,Zdhhc2,Pacsin1,Akap9,Dagla,Grin3b,Oprd1,D3Bwg0562e,Eps8,Lrrc4b,Sigmar1,Abhd17b,Adra2c,Camk2n1,Sipa1l1,Lrrc4,Grin2b,Adam10,Ptprs,Dnm3,Rgs7bp,Shisa6,Nf1,Drd2,Gria3,Crtc1,Ptpro,Map2,Homer1,Htt,Syngap1…	7.09e-12	4.79e-10	Neuron to neuron synapse	34.6875
COMPARTMENTS	GOCC:0097060	123	372	10090	10090.ENSMUSP00000000109,10090.ENSMUSP00000000572,10090.ENSMUSP00000001319,10090.ENSMUSP00000001548,10090.ENSMUSP00000002848,10090.ENSMUSP00000003550,10090.ENSMUSP00000003754,10090.ENSMUSP00000005077,10090.ENSMUSP00000005509,10090.ENSMUSP00000007130,10090.ENSMUSP00000019290,10090.ENSMUSP00000020107,10090.ENSMUSP00000020706,10090.ENSMUSP00000021195,10090.ENSMUSP00000023007,10090.ENSMUSP00000023334…	Cntn1,Gabra2,Efnb2,Itga3,Grin2d,Ncstn,Calb2,Hspb1,Stx1a,Ctnnb1,Cacng2,Atp2b1,Adcy1,Slc6a4,Adcy8,Pvrl3,P2rx6,Slc4a8,Ache,Gabbr1,Cnih2,Apba1,Farp1,Gria4,Snap25,Snph,Gabrd,Nsg1,Gabrg1,Slc6a6,Slc6a8,Gpm6a,Cbln1,Pvrl1,Clstn1,Grm1,Htr5a,Ptprf,Exoc3,Kcna2,Syde1,Pacsin1,Psenen,Pcdh8,Rims4,Akap9,Dagla,Igsf21,Htr2a,Grin3b,Oprd1,D3Bwg0562e,Lrrc4b,Flrt3,Adra1a,Erbb2,Kcna1,Abhd17b,Kcnb1,Adra2c,Kcnj9,Lrrc4,Gri…	7.19e-12	4.79e-10	Synaptic membrane	33.0645
Component	GO:0042175	247	963	10090	10090.ENSMUSP00000000001,10090.ENSMUSP00000000895,10090.ENSMUSP00000001507,10090.ENSMUSP00000002029,10090.ENSMUSP00000004381,10090.ENSMUSP00000004508,10090.ENSMUSP00000004968,10090.ENSMUSP00000005003,10090.ENSMUSP00000005651,10090.ENSMUSP00000006557,10090.ENSMUSP00000006853,10090.ENSMUSP00000008748,10090.ENSMUSP00000010807,10090.ENSMUSP00000014022,10090.ENSMUSP00000015011,10090.ENSMUSP00000015725…	Gnai3,Necab3,Cyp51,Emd,Lpcat3,Tmed4,Plod3,Lbr,Por,Elovl1,P4htm,Ubqln4,Fads1,Rnf170,Surf4,Bnip1,Cers2,Pip4k2b,Slc35b4,Atp6ap1,Rnf145,Ikbip,Egfr,Srebf1,Rsad2,Rab10,Lrrc59,Gosr2,Sptlc2,Sgpp1,Tmx1,Cyp46a1,Ryr2,Lman2,Ptdss1,Hmgcr,Ero1l,Tkt,Jph4,Fam134b,Sqle,Lmf2,Cers5,Nus1,March5,Agpat4,Pkmyt1,Abcg1,Cyp1b1,Vapa,Pigf,Tap2,Dnajc18,Gabbr1,Fads2,Osbp,Tm7sf2,Cnih2,Cyp26a1,Scd3,Scd2,Jph3,Rdh5,Esyt1,Rdh10,Ab…	8.03e-12	2.67e-10	Nuclear outer membrane-endoplasmic reticulum membrane network	25.649
Process	GO:0045596	206	761	10090	10090.ENSMUSP00000000122,10090.ENSMUSP00000000127,10090.ENSMUSP00000000186,10090.ENSMUSP00000000542,10090.ENSMUSP00000000579,10090.ENSMUSP00000000641,10090.ENSMUSP00000001319,10090.ENSMUSP00000002320,10090.ENSMUSP00000002708,10090.ENSMUSP00000003238,10090.ENSMUSP00000004202,10090.ENSMUSP00000004326,10090.ENSMUSP00000004327,10090.ENSMUSP00000004646,10090.ENSMUSP00000004920,10090.ENSMUSP00000005218…	Ngfr,Wnt3,Fgf23,Acvrl1,Sox9,Sema4f,Efnb2,Ppard,Shh,Foxj2,Dnmt1,Plxna3,G6pdx,Coro1c,Ulk2,Cd44,Wisp1,Klf5,Ctnnb1,Tgfbr1,Rhoa,Bmp7,Cers2,Ctsz,Cul4a,Mmp9,Hdac2,Ascl1,Egfr,Kremen1,Trib2,Slc6a4,Fam101b,Nme2,Plk2,Fst,Fgf9,Rb1,Spry2,Bcl6,Abcg1,Xdh,Syt4,Dpysl3,Smad4,Fas,Slit1,Ankrd2,Limd1,Smad7,Ctdsp1,Itm2c,Rab29,Vim,Grb14,Frzb,Jag1,Spred1,Zc3h8,Stmn2,Eif4e,Npr2,Sema3c,Sema3a,Cdk5,Draxin,Sema3d,Cd38,Rufy3…	9.14e-12	1.03e-09	Negative regulation of cell differentiation	27.0696
Process	GO:0014070	240	930	10090	10090.ENSMUSP00000000001,10090.ENSMUSP00000000186,10090.ENSMUSP00000000193,10090.ENSMUSP00000000466,10090.ENSMUSP00000001592,10090.ENSMUSP00000001780,10090.ENSMUSP00000002320,10090.ENSMUSP00000002466,10090.ENSMUSP00000002487,10090.ENSMUSP00000003550,10090.ENSMUSP00000003717,10090.ENSMUSP00000004137,10090.ENSMUSP00000005066,10090.ENSMUSP00000005279,10090.ENSMUSP00000006467,10090.ENSMUSP00000006828…	Gnai3,Fgf23,Ccl2,Plin2,Jup,Akt1,Ppard,Nr2f6,Braf,Ncstn,Abcb4,Gstm7,Map2k1,Klf5,Arpc2,Aplp1,Tph2,Ctnnb1,Tgfbr1,Rhoa,Bmp7,Elk1,Fads1,Pea15a,Endog,Cd83,Rxrg,Fnta,Top2b,Cd40,Hdac2,Atp2b1,Dusp6,Ctgf,Ascl1,Avpr1a,Egfr,Nsg2,Btg2,Adcy1,Srebf1,Nampt,Sdc1,Ddx5,Slc9a3r1,Slc6a4,Fos,Ryr2,Adcy2,Dhfr,Dpysl2,Nefl,Bcl2l2,Adcy8,Vdr,P2rx6,Pak2,Atp5o,Sod1,Dhh,Calcoco1,Pim1,Eif2ak2,Cyp1b1,Riok3,Impact,Gnal,Gna14,Fas,…	9.73e-12	1.08e-09	Response to organic cyclic compound	25.8065
Process	GO:0030334	237	915	10090	10090.ENSMUSP00000000193,10090.ENSMUSP00000000542,10090.ENSMUSP00000000579,10090.ENSMUSP00000000590,10090.ENSMUSP00000000641,10090.ENSMUSP00000001548,10090.ENSMUSP00000001592,10090.ENSMUSP00000001780,10090.ENSMUSP00000001963,10090.ENSMUSP00000002303,10090.ENSMUSP00000002320,10090.ENSMUSP00000002487,10090.ENSMUSP00000002708,10090.ENSMUSP00000004326,10090.ENSMUSP00000004646,10090.ENSMUSP00000004715…	Ccl2,Acvrl1,Sox9,Rdx,Sema4f,Itga3,Jup,Akt1,Ace,Rhoc,Ppard,Braf,Shh,Plxna3,Coro1c,Mospd2,Mapk14,Map2k1,Zp3,Hspb1,Wisp1,Arpc2,Tgfbr1,Rhoa,Coro1b,Bmp7,Timp1,Csf1,Lama5,Cers2,Cd40,Mmp9,Pfn1,Adora2b,Mcu,Egfr,Gnb2l1,Igfbp3,Gna13,Ccl7,Slc9a3r1,Hif1a,F2rl1,Plk2,Vcl,Fgf9,Rgcc,Spry2,Angpt1,Robo1,Adamts1,Nus1,Pla2g7,Cyp1b1,Dpysl3,Fas,Podxl,Ptp4a1,Ppm1f,Vim,Acvr1c,Itga6,Jag1,Spred1,S100a11,Lef1,Lmna,Cyr61,Cp…	9.75e-12	1.08e-09	Regulation of cell migration	25.9016
Process	GO:0050768	114	336	10090	10090.ENSMUSP00000000122,10090.ENSMUSP00000000127,10090.ENSMUSP00000000579,10090.ENSMUSP00000000641,10090.ENSMUSP00000001319,10090.ENSMUSP00000002708,10090.ENSMUSP00000004326,10090.ENSMUSP00000004920,10090.ENSMUSP00000007130,10090.ENSMUSP00000007959,10090.ENSMUSP00000009143,10090.ENSMUSP00000015858,10090.ENSMUSP00000016400,10090.ENSMUSP00000019911,10090.ENSMUSP00000020243,10090.ENSMUSP00000020662…	Ngfr,Wnt3,Sox9,Sema4f,Efnb2,Shh,Plxna3,Ulk2,Ctnnb1,Rhoa,Bmp7,Cers2,Ctsz,Hdac2,Ascl1,Kremen1,Slc6a4,Plk2,Syt4,Dpysl3,Fas,Slit1,Ctdsp1,Itm2c,Rab29,Vim,Jag1,Stmn2,Eif4e,Sema3c,Sema3a,Cdk5,Draxin,Sema3d,Cd38,Rufy3,Dtx1,Fkbp4,Xylt1,Fgf13,Ldlr,Ptpn9,Isl2,Gak,Tspo,Hey1,Ptchd2,BC027231,Sema7a,Tmem98,Dicer1,Lrp1,Dusp10,Inpp5f,Mycn,AF529169,Inpp5j,Mylip,Tlx3,Trpc5,Ppp3ca,Arf6,Sorl1,Nog,Bmerb1,Neo1,Ptprs,Dn…	1.15e-11	1.23e-09	Negative regulation of neurogenesis	33.9286
Process	GO:0048812	146	479	10090	10090.ENSMUSP00000000122,10090.ENSMUSP00000000127,10090.ENSMUSP00000000641,10090.ENSMUSP00000001319,10090.ENSMUSP00000002708,10090.ENSMUSP00000004326,10090.ENSMUSP00000004920,10090.ENSMUSP00000005066,10090.ENSMUSP00000007130,10090.ENSMUSP00000007959,10090.ENSMUSP00000009143,10090.ENSMUSP00000017629,10090.ENSMUSP00000017868,10090.ENSMUSP00000018880,10090.ENSMUSP00000020329,10090.ENSMUSP00000020706…	Ngfr,Wnt3,Sema4f,Efnb2,Shh,Plxna3,Ulk2,Map2k1,Ctnnb1,Rhoa,Bmp7,Top2b,Etv4,Ndel1,Egfr,Adcy1,Rab10,Vcl,Clu,Dpysl2,Nefl,Alcam,Robo1,Impact,Smad4,Slit1,Farp1,Nptx1,Hprt,Unc5a,Lhx4,Kif5c,Efna3,Nr4a3,Sema3c,Stmn1,Sema3a,Cdk5,Draxin,Sema3d,Uchl1,Wasl,Pak1,Ilk,Wee1,Gpm6a,Pvrl1,Isl2,Brsk1,Egr2,Sema7a,Dicer1,Lama1,Lrp1,Pacsin1,Ndn,Gbx2,Epha10,Plxnb2,D3Bwg0562e,Flrt3,Erbb2,Cdc42,Dscam,Nog,Flrt2,Neo1,Chl1,Sl…	1.21e-11	1.29e-09	Neuron projection morphogenesis	30.4802
Process	GO:0040008	193	701	10090	10090.ENSMUSP00000000095,10090.ENSMUSP00000000127,10090.ENSMUSP00000000542,10090.ENSMUSP00000000641,10090.ENSMUSP00000001347,10090.ENSMUSP00000001780,10090.ENSMUSP00000002320,10090.ENSMUSP00000004326,10090.ENSMUSP00000004327,10090.ENSMUSP00000004920,10090.ENSMUSP00000004964,10090.ENSMUSP00000004990,10090.ENSMUSP00000005073,10090.ENSMUSP00000005218,10090.ENSMUSP00000005255,10090.ENSMUSP00000005647…	Tbx2,Wnt3,Acvrl1,Sema4f,Rnd2,Akt1,Ppard,Plxna3,G6pdx,Ulk2,Pou1f1,Mapk14,Zp3,Cd44,Wisp1,Ndufs3,Por,Tgfbr1,Rhoa,Sertad1,Csf1,Limk1,Trpv2,Ndel1,Sfrp5,Wwc1,Hdac2,Dusp6,Avpr1a,Egfr,Gnb2l1,Igfbp3,Slc6a4,Hif1a,Tkt,Lats2,Fgf9,Dpysl2,Rb1,Bcl6,Pak2,Cxadr,Sod1,Pim1,Syt4,Smad4,Smarca2,Slit1,Smad7,Ppm1f,Parp1,Frzb,Ogfr,Serp1,Lef1,Lamtor2,Sdcbp,Ppt1,Cda,Sema3c,Slc9a1,Sema3a,Cdk5,Draxin,Sema3d,Cd38,Cgref1,Rufy3…	1.26e-11	1.33e-09	Regulation of growth	27.5321
Component	GO:0030426	87	224	10090	10090.ENSMUSP00000000122,10090.ENSMUSP00000001548,10090.ENSMUSP00000004673,10090.ENSMUSP00000006467,10090.ENSMUSP00000015137,10090.ENSMUSP00000016400,10090.ENSMUSP00000017610,10090.ENSMUSP00000018651,10090.ENSMUSP00000018880,10090.ENSMUSP00000018909,10090.ENSMUSP00000020999,10090.ENSMUSP00000022616,10090.ENSMUSP00000022629,10090.ENSMUSP00000022639,10090.ENSMUSP00000023572,10090.ENSMUSP00000025379…	Ngfr,Itga3,Ndrg2,Arpc2,Limk1,Ctsz,Timp2,Trpv2,Ndel1,Fxr2,Kif3c,Clu,Dpysl2,Nefl,Cxadr,Dpysl3,Ighmbp2,Dctn2,Kif5c,Snap25,Stmn2,Ptbp2,Pink1,Cdk5,Rufy3,Fscn1,Fkbp4,Pak1,Fgf13,Gpm6a,Pvrl1,Rasgrf1,Gdpd5,Atcay,Copg2,Ptprf,Exoc3,Cbl,Zfp804a,Sncb,Dicer1,Lrp1,Inpp5j,Trpc5,Amfr,Eps8,Flrt3,Basp1,Nrsn1,Sigmar1,Dscam,Ptprs,Ywhae,Tubb3,Sirt2,Stmn4,Map2,Arpc5,Eno1,Cdkl5,Usp9x,Erc2,Kif5a,Stmn3,Hap1,Itga4,Gap43,Rt…	1.3e-11	4.23e-10	Growth cone	38.8393
Process	GO:0022604	156	528	10090	10090.ENSMUSP00000000127,10090.ENSMUSP00000000193,10090.ENSMUSP00000000590,10090.ENSMUSP00000000641,10090.ENSMUSP00000001347,10090.ENSMUSP00000002487,10090.ENSMUSP00000004326,10090.ENSMUSP00000004646,10090.ENSMUSP00000004920,10090.ENSMUSP00000005066,10090.ENSMUSP00000005218,10090.ENSMUSP00000005234,10090.ENSMUSP00000006467,10090.ENSMUSP00000008893,10090.ENSMUSP00000015137,10090.ENSMUSP00000015486…	Wnt3,Ccl2,Rdx,Sema4f,Rnd2,Braf,Plxna3,Coro1c,Ulk2,Map2k1,Cd44,Wdr1,Arpc2,Coro1b,Limk1,Xk,Wasf3,Myh9,Trpv2,Ndel1,Gna13,Ccl7,Slc9a3r1,Hexb,Dpysl2,Nefm,Nefl,Robo1,Ache,Rhoq,Bambi,Syt4,Slit1,P4hb,Limd1,Mkln1,Vim,Pdpn,Sema3c,Sema3a,Cdk5,Draxin,Sema3d,Rufy3,Wasl,Ret,Pak1,Ilk,Fgf13,Ist1,Phip,S100a10,Hnrnpk,Ptprf,Brsk1,Ss18l1,Rhov,Sema7a,Lrp1,Palmd,Fmnl1,Ttl,Wipf2,Fbxw8,Map3k13,S100a13,Trpc5,Kndc1,Plxnb2…	1.71e-11	1.77e-09	Regulation of cell morphogenesis	29.5455
Process	GO:0000904	166	575	10090	10090.ENSMUSP00000000122,10090.ENSMUSP00000000127,10090.ENSMUSP00000000641,10090.ENSMUSP00000001319,10090.ENSMUSP00000002708,10090.ENSMUSP00000004326,10090.ENSMUSP00000004920,10090.ENSMUSP00000004968,10090.ENSMUSP00000005234,10090.ENSMUSP00000007130,10090.ENSMUSP00000007959,10090.ENSMUSP00000009143,10090.ENSMUSP00000015791,10090.ENSMUSP00000016315,10090.ENSMUSP00000016771,10090.ENSMUSP00000017629…	Ngfr,Wnt3,Sema4f,Efnb2,Shh,Plxna3,Ulk2,Plod3,Wdr1,Ctnnb1,Rhoa,Bmp7,Lama5,Lamb3,Myh9,Top2b,Etv4,Ndel1,Ntn4,Adcy1,Rab10,Slc9a3r1,Cdhr1,Vcl,Lats2,Dpysl2,Rb1,Alcam,Robo1,Sod1,Smad4,Slit1,Hexa,Farp1,Nptx1,Hprt,Unc5a,Lhx4,Kif5c,Lef1,Efna3,Nr4a3,Sema3c,Stmn1,Sema3a,Cdk5,Draxin,Sema3d,Uchl1,Vps33a,Wasl,Lrp6,Ilk,Sfrp1,Pvrl1,Isl2,Brsk1,Micall2,Egr2,Clic4,Sema7a,Lama1,Lrp1,Ndn,Gbx2,Rilpl1,Epha10,Dact2,Plxnb…	1.75e-11	1.78e-09	Cell morphogenesis involved in differentiation	28.8696
COMPARTMENTS	GOCC:0014069	102	288	10090	10090.ENSMUSP00000000122,10090.ENSMUSP00000000543,10090.ENSMUSP00000001319,10090.ENSMUSP00000002848,10090.ENSMUSP00000005077,10090.ENSMUSP00000005509,10090.ENSMUSP00000007130,10090.ENSMUSP00000009538,10090.ENSMUSP00000019290,10090.ENSMUSP00000020706,10090.ENSMUSP00000021802,10090.ENSMUSP00000022638,10090.ENSMUSP00000022894,10090.ENSMUSP00000023007,10090.ENSMUSP00000023211,10090.ENSMUSP00000023334…	Ngfr,Grasp,Efnb2,Grin2d,Hspb1,Stx1a,Ctnnb1,Syn2,Cacng2,Adcy1,Cap2,Nefm,Ywhaz,Adcy8,Sharpin,Pvrl3,Cnih2,Gria4,Fabp5,Rheb,Cdk5,Add2,Pak1,Snx1,Bsn,Tanc1,Clstn1,Grm1,Ptprf,Atp1a1,Zdhhc2,Pacsin1,Akap9,Dagla,Grin3b,Oprd1,D3Bwg0562e,Eps8,Lrrc4b,Sigmar1,Abhd17b,Adra2c,Camk2n1,Sipa1l1,Lrrc4,Grin2b,Adam10,Ptprs,Dnm3,Rgs7bp,Shisa6,Nf1,Drd2,Gria3,Crtc1,Ptpro,Map2,Homer1,Htt,Syngap1,Kcnd2,Scn8a,Cacng3,Insyn1,…	1.9e-11	1.21e-09	Postsynaptic density	35.4167
Process	GO:0051129	198	733	10090	10090.ENSMUSP00000000122,10090.ENSMUSP00000000127,10090.ENSMUSP00000000542,10090.ENSMUSP00000000579,10090.ENSMUSP00000000590,10090.ENSMUSP00000000641,10090.ENSMUSP00000000939,10090.ENSMUSP00000001319,10090.ENSMUSP00000001548,10090.ENSMUSP00000001780,10090.ENSMUSP00000001963,10090.ENSMUSP00000004202,10090.ENSMUSP00000004326,10090.ENSMUSP00000004646,10090.ENSMUSP00000004920,10090.ENSMUSP00000007959…	Ngfr,Wnt3,Acvrl1,Sox9,Rdx,Sema4f,Hip1r,Efnb2,Itga3,Akt1,Ace,Dnmt1,Plxna3,Coro1c,Ulk2,Rhoa,Ubqln4,Coro1b,Bmp7,Nol3,Cers2,Ctsz,Pfn1,Hdac2,Kremen1,Pfn4,Ppm1a,Plk2,Vdac2,Dnajc15,Rgcc,Clu,Spry2,Bcl2l2,Twf1,Mpv17l,Pak2,Rps6ka2,Arhgap28,Syt4,Riok3,Impact,Dcp2,Dpysl3,Smad4,Otub1,Slit1,Itm2c,Rab29,Parp1,Fh1,Vim,Gsn,Nat10,Cst3,Snph,Mapre1,Stmn2,Sec22b,Lmna,Sdcbp,Tnfrsf1b,Pink1,Sema3c,Stmn1,Sema3a,Cdk5,Dffa…	2.74e-11	2.72e-09	Negative regulation of cellular component organization	27.0123
COMPARTMENTS	GOCC:0099572	111	329	10090	10090.ENSMUSP00000000122,10090.ENSMUSP00000000543,10090.ENSMUSP00000000572,10090.ENSMUSP00000001319,10090.ENSMUSP00000002848,10090.ENSMUSP00000005077,10090.ENSMUSP00000005509,10090.ENSMUSP00000007130,10090.ENSMUSP00000009538,10090.ENSMUSP00000019290,10090.ENSMUSP00000020706,10090.ENSMUSP00000021802,10090.ENSMUSP00000022638,10090.ENSMUSP00000022894,10090.ENSMUSP00000023007,10090.ENSMUSP00000023211…	Ngfr,Grasp,Gabra2,Efnb2,Grin2d,Hspb1,Stx1a,Ctnnb1,Syn2,Cacng2,Adcy1,Cap2,Nefm,Ywhaz,Adcy8,Sharpin,Pvrl3,P2rx6,Cnih2,Gria4,Fabp5,Rheb,Cdk5,Add2,Pak1,Snx1,Bsn,Tanc1,Clstn1,Grm1,Htr5a,Ptprf,Atp1a1,Zdhhc2,Pacsin1,Akap9,Dagla,Grin3b,Oprd1,D3Bwg0562e,Eps8,Lrrc4b,Sigmar1,Abhd17b,Adra2c,Camk2n1,Sipa1l1,Lrrc4,Grin2b,Gabrg2,Adam10,Ptprs,Dnm3,Nlgn3,Rgs7bp,Shisa6,Nf1,Nptx2,Drd2,Gria3,Crtc1,Ptpro,Map2,Homer1,…	2.81e-11	1.74e-09	Postsynaptic specialization	33.7386
Process	GO:0051962	181	651	10090	10090.ENSMUSP00000000109,10090.ENSMUSP00000000122,10090.ENSMUSP00000000127,10090.ENSMUSP00000001347,10090.ENSMUSP00000001548,10090.ENSMUSP00000001963,10090.ENSMUSP00000002487,10090.ENSMUSP00000002708,10090.ENSMUSP00000004326,10090.ENSMUSP00000005066,10090.ENSMUSP00000005077,10090.ENSMUSP00000007130,10090.ENSMUSP00000007959,10090.ENSMUSP00000008878,10090.ENSMUSP00000009143,10090.ENSMUSP00000014743…	Cntn1,Ngfr,Wnt3,Rnd2,Itga3,Ace,Braf,Shh,Plxna3,Map2k1,Hspb1,Ctnnb1,Rhoa,Gprc5b,Bmp7,Csf1,Limk1,Wasf3,Timp2,Trpv2,Ndel1,Hdac2,Snx3,Ascl1,Kif3c,Nme2,Snw1,Hif1a,Nefl,Twf1,Bcl6,Rrn3,Robo1,Adamts1,Ache,Syt4,Impact,Dpysl3,Ehd1,Ppp2r5b,Ankrd1,Rela,Vim,Itga6,Stmn2,Serpini1,Tnfrsf1b,Sema3a,Rheb,Rufy3,Scarb2,Ret,Lrp6,Camk1,Pak1,Ilk,Star,Cbln1,Ist1,Cx3cl1,Tmem30a,Gdpd5,Clstn1,Camk1d,Tspo,Tox,Enc1,Hnrnpk,Ptp…	2.86e-11	2.82e-09	Positive regulation of nervous system development	27.8034
Process	GO:0010977	74	177	10090	10090.ENSMUSP00000000122,10090.ENSMUSP00000000127,10090.ENSMUSP00000000641,10090.ENSMUSP00000001319,10090.ENSMUSP00000004326,10090.ENSMUSP00000004920,10090.ENSMUSP00000007959,10090.ENSMUSP00000015858,10090.ENSMUSP00000016400,10090.ENSMUSP00000019911,10090.ENSMUSP00000020662,10090.ENSMUSP00000022212,10090.ENSMUSP00000025379,10090.ENSMUSP00000025993,10090.ENSMUSP00000027425,10090.ENSMUSP00000027693…	Ngfr,Wnt3,Sema4f,Efnb2,Plxna3,Ulk2,Rhoa,Cers2,Ctsz,Hdac2,Kremen1,Plk2,Dpysl3,Slit1,Itm2c,Rab29,Vim,Stmn2,Sema3c,Sema3a,Cdk5,Draxin,Sema3d,Cd38,Rufy3,Fkbp4,Xylt1,Fgf13,Ptpn9,Gak,Sema7a,Lrp1,Inpp5f,AF529169,Inpp5j,Mylip,Trpc5,Ppp3ca,Arf6,Neo1,Ptprs,Dnm3,Gfap,Nlgn3,Epha3,Zfp365,Sema5a,Sema3e,Ntm,Map2,Dab2,Syngap1,Lgals1,Nr2f1,Rgma,Rap1gap2,Rtn4,Ephb2,Dab1,Ube3a,D8Ertd82e,Tnr,Tsc1,Crmp1,Thy1,Rapgef2,…	2.97e-11	2.88e-09	Negative regulation of neuron projection development	41.8079
COMPARTMENTS	GOCC:0032279	103	297	10090	10090.ENSMUSP00000000122,10090.ENSMUSP00000000543,10090.ENSMUSP00000001319,10090.ENSMUSP00000002848,10090.ENSMUSP00000005077,10090.ENSMUSP00000005509,10090.ENSMUSP00000007130,10090.ENSMUSP00000009538,10090.ENSMUSP00000019290,10090.ENSMUSP00000020706,10090.ENSMUSP00000021802,10090.ENSMUSP00000022638,10090.ENSMUSP00000022894,10090.ENSMUSP00000023007,10090.ENSMUSP00000023211,10090.ENSMUSP00000023334…	Ngfr,Grasp,Efnb2,Grin2d,Hspb1,Stx1a,Ctnnb1,Syn2,Cacng2,Adcy1,Cap2,Nefm,Ywhaz,Adcy8,Sharpin,Pvrl3,Cnih2,Slc1a1,Gria4,Fabp5,Rheb,Cdk5,Add2,Pak1,Snx1,Bsn,Tanc1,Clstn1,Grm1,Ptprf,Atp1a1,Zdhhc2,Pacsin1,Akap9,Dagla,Grin3b,Oprd1,D3Bwg0562e,Eps8,Lrrc4b,Sigmar1,Abhd17b,Adra2c,Camk2n1,Sipa1l1,Lrrc4,Grin2b,Adam10,Ptprs,Dnm3,Rgs7bp,Shisa6,Nf1,Drd2,Gria3,Crtc1,Ptpro,Map2,Homer1,Htt,Syngap1,Kcnd2,Scn8a,Cacng3,…	4.06e-11	2.38e-09	Asymmetric synapse	34.6801
Process	GO:0044255	210	797	10090	10090.ENSMUSP00000000287,10090.ENSMUSP00000002320,10090.ENSMUSP00000002549,10090.ENSMUSP00000003720,10090.ENSMUSP00000004137,10090.ENSMUSP00000004381,10090.ENSMUSP00000004990,10090.ENSMUSP00000005651,10090.ENSMUSP00000006557,10090.ENSMUSP00000006692,10090.ENSMUSP00000006912,10090.ENSMUSP00000007005,10090.ENSMUSP00000008579,10090.ENSMUSP00000010807,10090.ENSMUSP00000013970,10090.ENSMUSP00000015858…	Scpep1,Ppard,Abhd3,Crot,Gstm7,Lpcat3,Mapk14,Por,Elovl1,Mvd,Pip4k2a,Acat2,Rdh13,Fads1,Pip4k2c,Cers2,Serinc3,Pip4k2b,Echdc1,Pex7,Egfr,Slc22a4,Sh3yl1,Aloxe3,Sptlc2,Sgpp1,Ptdss1,Hexb,Hmgcr,Fam135b,Slc25a17,Naga,Cers5,Nus1,Agpat4,Pla2g7,Cyp1b1,Eci1,Pigf,Stard4,Fads2,Cpt1a,Cyp26a1,Pnliprp2,Pcyt2,Scd3,Scd2,Hexa,Itgb8,Rdh5,St8sia2,Rdh10,Acadl,Cln8,Bpnt1,Crat,Agpat2,Lpcat4,Cat,Hsd17b12,Hao1,Ivd,Crls1,Fabp…	4.41e-11	4.06e-09	Cellular lipid metabolic process	26.3488
Process	GO:2000145	243	963	10090	10090.ENSMUSP00000000193,10090.ENSMUSP00000000542,10090.ENSMUSP00000000579,10090.ENSMUSP00000000590,10090.ENSMUSP00000000641,10090.ENSMUSP00000001548,10090.ENSMUSP00000001592,10090.ENSMUSP00000001780,10090.ENSMUSP00000001963,10090.ENSMUSP00000002303,10090.ENSMUSP00000002320,10090.ENSMUSP00000002487,10090.ENSMUSP00000002708,10090.ENSMUSP00000004326,10090.ENSMUSP00000004646,10090.ENSMUSP00000004715…	Ccl2,Acvrl1,Sox9,Rdx,Sema4f,Itga3,Jup,Akt1,Ace,Rhoc,Ppard,Braf,Shh,Plxna3,Coro1c,Mospd2,Mapk14,Map2k1,Zp3,Hspb1,Wisp1,Arpc2,Tgfbr1,Rhoa,Coro1b,Bmp7,Timp1,Csf1,Lama5,Cers2,Cd40,Mmp9,Pfn1,Adora2b,Mcu,Egfr,Gnb2l1,Igfbp3,Gna13,Ccl7,Slc9a3r1,Hif1a,F2rl1,Plk2,Vcl,Fgf9,Rgcc,Spry2,Angpt1,Robo1,Adamts1,Nus1,Pla2g7,Cyp1b1,Dpysl3,Fas,Podxl,Ptp4a1,Ppm1f,Vim,Acvr1c,Itga6,Jag1,Spred1,Anxa5,S100a11,Lef1,Lmna,Cy…	4.62e-11	4.22e-09	Regulation of cell motility	25.2336
Process	GO:0010720	182	661	10090	10090.ENSMUSP00000000109,10090.ENSMUSP00000000122,10090.ENSMUSP00000000127,10090.ENSMUSP00000001347,10090.ENSMUSP00000001548,10090.ENSMUSP00000001963,10090.ENSMUSP00000002487,10090.ENSMUSP00000002708,10090.ENSMUSP00000004326,10090.ENSMUSP00000005066,10090.ENSMUSP00000005077,10090.ENSMUSP00000005255,10090.ENSMUSP00000006467,10090.ENSMUSP00000007130,10090.ENSMUSP00000007959,10090.ENSMUSP00000008878…	Cntn1,Ngfr,Wnt3,Rnd2,Itga3,Ace,Braf,Shh,Plxna3,Map2k1,Hspb1,Wisp1,Arpc2,Ctnnb1,Rhoa,Gprc5b,Bmp7,Csf1,Limk1,Timp2,Trpv2,Ndel1,Atp6ap1,Hdac2,Snx3,Ascl1,Kif3c,Nme2,Snw1,Hif1a,Nefl,Twf1,Bcl6,Rrn3,Robo1,Adamts1,Ache,Syt4,Impact,Dpysl3,Ehd1,Ppp2r5b,Ankrd1,Rela,P4hb,Smad7,Vim,Itga6,Stmn2,Serpini1,Casp6,Tnfrsf1b,Sema3c,Sema3a,Rheb,Rufy3,Scarb2,Ret,Lrp6,Camk1,Pak1,Ilk,Star,Ist1,Cx3cl1,Cdh5,Pin1,Tmem30a,Gd…	4.9e-11	4.45e-09	Positive regulation of cell development	27.534
Process	GO:0045665	94	261	10090	10090.ENSMUSP00000000122,10090.ENSMUSP00000000127,10090.ENSMUSP00000000579,10090.ENSMUSP00000000641,10090.ENSMUSP00000001319,10090.ENSMUSP00000002708,10090.ENSMUSP00000004326,10090.ENSMUSP00000004920,10090.ENSMUSP00000007959,10090.ENSMUSP00000009143,10090.ENSMUSP00000015858,10090.ENSMUSP00000016400,10090.ENSMUSP00000019911,10090.ENSMUSP00000020243,10090.ENSMUSP00000020662,10090.ENSMUSP00000021195…	Ngfr,Wnt3,Sox9,Sema4f,Efnb2,Shh,Plxna3,Ulk2,Rhoa,Bmp7,Cers2,Ctsz,Hdac2,Ascl1,Kremen1,Slc6a4,Plk2,Dpysl3,Slit1,Ctdsp1,Itm2c,Rab29,Vim,Jag1,Stmn2,Eif4e,Sema3c,Sema3a,Cdk5,Draxin,Sema3d,Cd38,Rufy3,Dtx1,Fkbp4,Xylt1,Fgf13,Ptpn9,Isl2,Gak,Hey1,Ptchd2,BC027231,Sema7a,Lrp1,Inpp5f,AF529169,Inpp5j,Mylip,Tlx3,Trpc5,Ppp3ca,Arf6,Neo1,Ptprs,Dnm3,Gfap,Nlgn3,Epha3,Zfp365,Sema5a,Sema3e,Ntm,Map2,Dab2,Syngap1,Cntn2,…	5.62e-11	5.03e-09	Negative regulation of neuron differentiation	36.0153
Process	GO:0032990	152	522	10090	10090.ENSMUSP00000000122,10090.ENSMUSP00000000127,10090.ENSMUSP00000000641,10090.ENSMUSP00000001127,10090.ENSMUSP00000001319,10090.ENSMUSP00000002708,10090.ENSMUSP00000004326,10090.ENSMUSP00000004920,10090.ENSMUSP00000005066,10090.ENSMUSP00000007130,10090.ENSMUSP00000007959,10090.ENSMUSP00000009143,10090.ENSMUSP00000017629,10090.ENSMUSP00000017868,10090.ENSMUSP00000018880,10090.ENSMUSP00000020329…	Ngfr,Wnt3,Sema4f,Poldip2,Efnb2,Shh,Plxna3,Ulk2,Map2k1,Ctnnb1,Rhoa,Bmp7,Top2b,Etv4,Ndel1,Egfr,Adcy1,Rab10,Vcl,Clu,Dpysl2,Nefl,Alcam,Robo1,Impact,Smad4,Slit1,Farp1,Nptx1,Hprt,Unc5a,Lhx4,Kif5c,Efna3,Nr4a3,Sema3c,Stmn1,Sema3a,Cdk5,Draxin,Sema3d,Uchl1,Wasl,Pak1,Ilk,Wee1,Gpm6a,Pvrl1,Isl2,Snx1,Snx2,Brsk1,Egr2,Sema7a,Dicer1,Lama1,Lrp1,Pacsin1,Ndn,Gbx2,Epha10,Plxnb2,D3Bwg0562e,Flrt3,Erbb2,Cdc42,Dscam,Nog,…	7.52e-11	6.59e-09	Cell part morphogenesis	29.1188
TISSUES	BTO:0000452	146	494	10090	10090.ENSMUSP00000000767,10090.ENSMUSP00000002029,10090.ENSMUSP00000004202,10090.ENSMUSP00000005826,10090.ENSMUSP00000006235,10090.ENSMUSP00000006764,10090.ENSMUSP00000007257,10090.ENSMUSP00000009530,10090.ENSMUSP00000011400,10090.ENSMUSP00000011896,10090.ENSMUSP00000016771,10090.ENSMUSP00000017188,10090.ENSMUSP00000017629,10090.ENSMUSP00000018727,10090.ENSMUSP00000019911,10090.ENSMUSP00000020171…	Rpa1,Emd,Dnmt1,Cs,Ctsb,Aprt,Clic1,Timp1,Adam19,Pgam1,Myh9,Serpinb6a,Top2b,G3bp1,Hdac2,Ctgf,Tbc1d15,Pfkl,Gnb2l1,Ddx5,Slc9a3r1,Npc2,Sdha,Dhfr,Vdac2,Glud1,Vcl,Tkt,Acin1,Angpt1,Eif3e,Twf1,Pak2,Tfrc,Sod1,Osbp,Smarca2,Rela,P4hb,Huwe1,Nab2,Hprt,Mcm6,Parp1,Fh1,Vim,Gsn,Xrn2,Mapre1,Anxa5,Trim33,S100a11,Lmna,Txn1,Vcp,Tln1,Cpt2,Stmn1,Slc9a1,Cdk5,Fosl2,Ugdh,Aldh2,Fscn1,Wasl,Stx4a,Ilk,Nono,Anxa2,Ppib,S100a10,H…	7.54e-11	9.84e-09	Fibroblast	29.5547
Process	GO:0050769	164	579	10090	10090.ENSMUSP00000000109,10090.ENSMUSP00000000122,10090.ENSMUSP00000000127,10090.ENSMUSP00000001347,10090.ENSMUSP00000001548,10090.ENSMUSP00000001963,10090.ENSMUSP00000002487,10090.ENSMUSP00000002708,10090.ENSMUSP00000004326,10090.ENSMUSP00000005066,10090.ENSMUSP00000005077,10090.ENSMUSP00000007130,10090.ENSMUSP00000007959,10090.ENSMUSP00000008878,10090.ENSMUSP00000009143,10090.ENSMUSP00000014743…	Cntn1,Ngfr,Wnt3,Rnd2,Itga3,Ace,Braf,Shh,Plxna3,Map2k1,Hspb1,Ctnnb1,Rhoa,Gprc5b,Bmp7,Csf1,Limk1,Timp2,Trpv2,Ndel1,Hdac2,Snx3,Ascl1,Kif3c,Nme2,Snw1,Hif1a,Nefl,Twf1,Bcl6,Rrn3,Robo1,Adamts1,Ache,Syt4,Impact,Dpysl3,Ehd1,Ppp2r5b,Ankrd1,Rela,Vim,Itga6,Stmn2,Serpini1,Tnfrsf1b,Sema3a,Rheb,Rufy3,Scarb2,Ret,Lrp6,Camk1,Pak1,Ilk,Star,Ist1,Cx3cl1,Tmem30a,Gdpd5,Camk1d,Tspo,Tox,Enc1,Hnrnpk,Ptprf,Fig4,Mapk6,Egr2,…	7.77e-11	6.77e-09	Positive regulation of neurogenesis	28.3247
Process	GO:0010243	244	975	10090	10090.ENSMUSP00000000001,10090.ENSMUSP00000000058,10090.ENSMUSP00000000122,10090.ENSMUSP00000000193,10090.ENSMUSP00000000299,10090.ENSMUSP00000000579,10090.ENSMUSP00000001592,10090.ENSMUSP00000001780,10090.ENSMUSP00000002487,10090.ENSMUSP00000003320,10090.ENSMUSP00000003550,10090.ENSMUSP00000004137,10090.ENSMUSP00000004202,10090.ENSMUSP00000004990,10090.ENSMUSP00000005279,10090.ENSMUSP00000005651…	Gnai3,Cav2,Ngfr,Ccl2,Itgb2,Sox9,Jup,Akt1,Braf,Eif2b5,Ncstn,Gstm7,Dnmt1,Mapk14,Klf5,Por,Snx6,Arpc2,Aprt,Aplp1,Ctnnb1,Rhoa,Bmp7,Timp1,Fads1,Pea15a,Cacybp,Qdpr,Gatsl2,Foxred2,Top2b,Cd40,Mmp9,Adora2b,Ndel1,Hdac2,Ctgf,Ascl1,Eif4ebp2,Egfr,Nsg2,Btg2,Srebf1,Nampt,Sdc1,Rab10,Slc9a3r1,Grb2,Slc6a4,Nme2,Serpina3n,Fos,Ryr2,Dhfr,Psmc6,Dpysl2,Nefl,Bcl2l2,Adcy8,Pde1b,P2rx6,Atp5o,Sod1,Asic1,Rhoq,Dnajc18,Bag6,Impa…	8.25e-11	7.09e-09	Response to organonitrogen compound	25.0256
COMPARTMENTS	GOCC:0098793	144	487	10090	10090.ENSMUSP00000000109,10090.ENSMUSP00000000193,10090.ENSMUSP00000000199,10090.ENSMUSP00000000572,10090.ENSMUSP00000001319,10090.ENSMUSP00000002708,10090.ENSMUSP00000003038,10090.ENSMUSP00000003550,10090.ENSMUSP00000003754,10090.ENSMUSP00000005509,10090.ENSMUSP00000006467,10090.ENSMUSP00000007130,10090.ENSMUSP00000007236,10090.ENSMUSP00000009538,10090.ENSMUSP00000009727,10090.ENSMUSP00000018437…	Cntn1,Ccl2,Ncs1,Gabra2,Efnb2,Shh,Ap2a2,Ncstn,Calb2,Stx1a,Arpc2,Ctnnb1,Syngr3,Syn2,Syngr1,Pfn1,Ndel1,Gipc1,Nts,Atp2b1,Ap3d1,Kif3c,Rab10,Slc6a4,Cyp46a1,Scamp1,Dpysl2,Nefm,Nefl,Adcy8,Slc4a8,Ache,Syt4,Gabbr1,Apba1,Slc1a1,Gria4,Stx6,Snap25,Snph,Anxa5,Sec22b,Prss12,Gucy1b3,Calb1,Slc2a1,Ppt1,Grik3,Stx12,Cdk5,Rab35,Npy,Slc2a3,Slc17a6,Ilk,Gpm6a,Pvrl1,Bsn,Scamp5,Tanc1,Grm1,Cplx1,Kcnk9,Hnrnpk,Exoc3,Brsk1,Kc…	9.9e-11	5.64e-09	Presynapse	29.5688
Process	GO:0050808	103	303	10090	10090.ENSMUSP00000000572,10090.ENSMUSP00000001319,10090.ENSMUSP00000001548,10090.ENSMUSP00000003442,10090.ENSMUSP00000004673,10090.ENSMUSP00000005256,10090.ENSMUSP00000007130,10090.ENSMUSP00000016143,10090.ENSMUSP00000018437,10090.ENSMUSP00000019290,10090.ENSMUSP00000022639,10090.ENSMUSP00000024099,10090.ENSMUSP00000026635,10090.ENSMUSP00000027693,10090.ENSMUSP00000029654,10090.ENSMUSP00000029912…	Gabra2,Efnb2,Itga3,Cacnb3,Ndrg2,Ndrg1,Ctnnb1,Wasf3,Pfn1,Cacng2,Nefl,Ache,Farp1,Rab29,Glrb,Sdcbp,Cdk5,Sparcl1,Wasl,Add2,Pak1,Fgf13,Col4a1,Gpm6a,Cbln1,Pin1,Bsn,Tanc1,Ky,C1qc,Sdk2,Ptprf,C1qb,Ina,Sncb,Igsf21,C1qa,Plxnb2,Lrrc4b,Flrt3,Fzd9,Erbb2,Cdc42,Arf6,Dscam,Sipa1l1,F2r,Lrrc4,Gabrg2,Adam10,Ptprs,Dnm3,Nlgn3,Epha3,Zfp365,Chat,Actg1,Pgrmc1,Sema3e,Myo5b,Nfia,Drd2,Pdzrn3,Efna5,Slitrk6,Homer1,Rph3a,Synga…	1.02e-10	8.68e-09	Synapse organization	33.9934
Process	GO:0045666	139	465	10090	10090.ENSMUSP00000000109,10090.ENSMUSP00000000122,10090.ENSMUSP00000000127,10090.ENSMUSP00000001347,10090.ENSMUSP00000001548,10090.ENSMUSP00000002487,10090.ENSMUSP00000002708,10090.ENSMUSP00000004326,10090.ENSMUSP00000005066,10090.ENSMUSP00000005077,10090.ENSMUSP00000007959,10090.ENSMUSP00000008878,10090.ENSMUSP00000009143,10090.ENSMUSP00000015137,10090.ENSMUSP00000017610,10090.ENSMUSP00000018651…	Cntn1,Ngfr,Wnt3,Rnd2,Itga3,Braf,Shh,Plxna3,Map2k1,Hspb1,Rhoa,Gprc5b,Bmp7,Limk1,Timp2,Trpv2,Ndel1,Snx3,Ascl1,Kif3c,Nme2,Nefl,Twf1,Bcl6,Rrn3,Robo1,Adamts1,Ache,Syt4,Impact,Dpysl3,Ehd1,Ppp2r5b,Ankrd1,Itga6,Stmn2,Serpini1,Rufy3,Scarb2,Ret,Lrp6,Camk1,Pak1,Ilk,Ist1,Cx3cl1,Tmem30a,Gdpd5,Camk1d,Tox,Enc1,Hnrnpk,Ptprf,Fig4,Mapk6,Ss18l1,Zfp804a,Sema7a,Eef1a1,Lrp1,Pacsin1,Fbxw8,Map3k13,Trpc5,Plxnb2,Bend6,Dsc…	1.14e-10	9.6e-09	Positive regulation of neuron differentiation	29.8925
Process	GO:0031345	81	212	10090	10090.ENSMUSP00000000122,10090.ENSMUSP00000000127,10090.ENSMUSP00000000641,10090.ENSMUSP00000001319,10090.ENSMUSP00000001548,10090.ENSMUSP00000004326,10090.ENSMUSP00000004920,10090.ENSMUSP00000007959,10090.ENSMUSP00000008893,10090.ENSMUSP00000015858,10090.ENSMUSP00000016400,10090.ENSMUSP00000019911,10090.ENSMUSP00000020662,10090.ENSMUSP00000022212,10090.ENSMUSP00000022709,10090.ENSMUSP00000025379…	Ngfr,Wnt3,Sema4f,Efnb2,Itga3,Plxna3,Ulk2,Rhoa,Coro1b,Cers2,Ctsz,Hdac2,Kremen1,Plk2,Spry2,Dpysl3,Slit1,Itm2c,Rab29,Vim,Stmn2,Sema3c,Sema3a,Cdk5,Draxin,Sema3d,Cd38,Rufy3,Fkbp4,Xylt1,Fgf13,Ptpn9,Gak,Ptprf,Sema7a,Lrp1,Inpp5f,AF529169,Inpp5j,Mylip,Trpc5,Ppp3ca,Arf6,Grin2b,Neo1,Ptprs,Dnm3,Gfap,Nlgn3,Epha3,Zfp365,Sema5a,Sema3e,Ntm,Map2,Dab2,Syngap1,Lgals1,Itgb1,Nr2f1,Rgma,Rap1gap2,Rtn4,Ephb2,Dab1,Ube3a,…	1.23e-10	1.03e-08	Negative regulation of cell projection organization	38.2075
Process	GO:0034330	142	481	10090	10090.ENSMUSP00000000572,10090.ENSMUSP00000001319,10090.ENSMUSP00000001548,10090.ENSMUSP00000001592,10090.ENSMUSP00000002303,10090.ENSMUSP00000003442,10090.ENSMUSP00000004673,10090.ENSMUSP00000005234,10090.ENSMUSP00000005256,10090.ENSMUSP00000007130,10090.ENSMUSP00000007959,10090.ENSMUSP00000016143,10090.ENSMUSP00000018437,10090.ENSMUSP00000019290,10090.ENSMUSP00000022185,10090.ENSMUSP00000022369…	Gabra2,Efnb2,Itga3,Jup,Rhoc,Cacnb3,Ndrg2,Wdr1,Ndrg1,Ctnnb1,Rhoa,Wasf3,Pfn1,Cacng2,F2rl1,Vcl,Nefl,Pak2,Cxadr,Ache,Farp1,Smad7,Rab29,Hipk1,Glrb,Sdcbp,Tln1,Cdk5,Sparcl1,Fscn1,Wasl,Add2,Cd9,Pak1,Fgf13,Col4a1,Gpm6a,Cbln1,Cdh5,Pvrl1,Pin1,Bsn,Tanc1,Ky,C1qc,Cdh6,Sdk2,Ptprf,Micall2,C1qb,Ina,Sncb,Igsf21,C1qa,Plxnb2,Sh3bp1,Pard6b,Lrrc4b,Flrt3,Fzd9,Itga2,Erbb2,Cdc42,Arf6,Dscam,Sipa1l1,F2r,Lrrc4,Gabrg2,Adam10…	1.46e-10	1.2e-08	Cell junction organization	29.5218
RCTM	MMU-556833	168	605	10090	10090.ENSMUSP00000001479,10090.ENSMUSP00000001507,10090.ENSMUSP00000002320,10090.ENSMUSP00000002549,10090.ENSMUSP00000003622,10090.ENSMUSP00000003720,10090.ENSMUSP00000004381,10090.ENSMUSP00000005003,10090.ENSMUSP00000006557,10090.ENSMUSP00000006692,10090.ENSMUSP00000006900,10090.ENSMUSP00000006912,10090.ENSMUSP00000007005,10090.ENSMUSP00000010807,10090.ENSMUSP00000013970,10090.ENSMUSP00000015858…	Kpnb1,Cyp51,Ppard,Abhd3,Slc25a1,Crot,Lpcat3,Lbr,Elovl1,Mvd,Acot13,Pip4k2a,Acat2,Fads1,Pip4k2c,Cers2,Mapkapk2,Pip4k2b,Slc22a5,Rufy1,Srebf1,Pctp,Aloxe3,Pik3r5,Sptlc2,Sgpp1,Cyp46a1,Ptdss1,Hexb,Hmgcr,Sqle,Slc25a17,Cyp2d22,Vdr,Cers5,Agpat4,Cyp1b1,Vapa,Eci1,Stard4,Fads2,Osbp,Tm7sf2,Cpt1a,Pcyt2,Scd2,Hexa,Acot9,Esyt1,Acadl,Cyp27a1,Crat,Agpat2,Lpcat4,Hsd17b12,Crls1,Fabp5,Decr1,Cpne3,Ugcg,Gba2,Prkaa2,Cyp2j…	1.61e-10	6.54e-08	Metabolism of lipids	27.7686
Keyword	KW-0333	211	821	10090	10090.ENSMUSP00000000058,10090.ENSMUSP00000000199,10090.ENSMUSP00000000895,10090.ENSMUSP00000002063,10090.ENSMUSP00000003117,10090.ENSMUSP00000009219,10090.ENSMUSP00000009234,10090.ENSMUSP00000015011,10090.ENSMUSP00000016323,10090.ENSMUSP00000017851,10090.ENSMUSP00000018711,10090.ENSMUSP00000019143,10090.ENSMUSP00000019723,10090.ENSMUSP00000020329,10090.ENSMUSP00000020350,10090.ENSMUSP00000020420…	Cav2,Ncs1,Necab3,Ap4e1,Ap1m1,Cabp7,Ap1b1,Surf4,Camk1g,Serinc3,Gabarap,Slc35b4,D17Wsu104e,Egfr,Lgr5,Ap3d1,Nsg2,Srebf1,Rab10,Grb2,Sec14l1,Gosr2,Trappc6b,Lman2,Scamp1,Bmp1,Fam134b,Cby1,Pkmyt1,Abcg1,Prrc1,Osbp,Pacs1,Apba1,Map4k2,Gfra1,St8sia2,Abcb6,Rab29,Stx6,Ext2,Stmn2,Nras,Sec22b,Ubxn2b,Slc35a1,Ugcg,Zdhhc21,B4galt1,Gba2,Glipr2,Leprot,Adc,Stx12,Rheb,Lrpap1,Nsg1,Gabarapl1,Golt1b,St8sia1,Ccdc91,Tnfrsf…	2.48e-10	1.5e-08	Golgi apparatus	25.7004
Function	GO:0019901	188	707	10090	10090.ENSMUSP00000000058,10090.ENSMUSP00000000199,10090.ENSMUSP00000000299,10090.ENSMUSP00000000542,10090.ENSMUSP00000000579,10090.ENSMUSP00000001592,10090.ENSMUSP00000001780,10090.ENSMUSP00000001963,10090.ENSMUSP00000002487,10090.ENSMUSP00000002808,10090.ENSMUSP00000003038,10090.ENSMUSP00000003442,10090.ENSMUSP00000003561,10090.ENSMUSP00000003964,10090.ENSMUSP00000004990,10090.ENSMUSP00000005066…	Cav2,Ncs1,Itgb2,Acvrl1,Sox9,Jup,Akt1,Ace,Braf,Prkra,Ap2a2,Cacnb3,Phyhip,Gys1,Mapk14,Map2k1,Hspb1,Cd44,Trap1,Ctnnb1,Rps18,Gprc5b,Ap1b1,Pgam1,Pea15a,Fbxw5,Fnta,Mapkapk2,Top2b,Slc12a7,Egfr,Gnb2l1,Srebf1,Trib2,Map2k6,Grb2,Hif1a,Ryr2,Shc3,Rgcc,Dpysl2,Spry2,Ywhaz,Angpt1,Pak2,Tfrc,Rhoq,Rela,Map4k2,Prdx3,Ankrd2,Dctn2,Parp1,Vim,Grb14,Spred1,Mapre1,Ptpn1,Fam83d,Anxa5,Bcl10,Cpne3,Nr4a3,Pink1,Casp9,Prkag2,Rh…	2.56e-10	3.94e-08	Protein kinase binding	26.5912
RCTM	MMU-112316	109	336	10090	10090.ENSMUSP00000000001,10090.ENSMUSP00000000572,10090.ENSMUSP00000002848,10090.ENSMUSP00000003038,10090.ENSMUSP00000003442,10090.ENSMUSP00000003971,10090.ENSMUSP00000005509,10090.ENSMUSP00000009538,10090.ENSMUSP00000009875,10090.ENSMUSP00000018614,10090.ENSMUSP00000019290,10090.ENSMUSP00000020706,10090.ENSMUSP00000021195,10090.ENSMUSP00000022013,10090.ENSMUSP00000022567,10090.ENSMUSP00000022639…	Gnai3,Gabra2,Grin2d,Ap2a2,Cacnb3,Lin7b,Stx1a,Syn2,Kcnd1,Kcnab3,Cacng2,Adcy1,Slc6a4,Adcy2,Cacna2d3,Nefl,Adcy8,Rps6ka2,Gabbr1,Gnal,Apba1,Slc1a1,Kcnk4,Gria4,Snap25,Glrb,Grik3,Aldh2,Camk1,Abcc8,Kcnj2,Grm1,Cplx1,Kcnk9,Ptprf,Prkar2b,Aldh5a1,Arl6ip5,Kcna2,Gng10,Kcnk1,Camk4,Kcnh5,Gls2,Kcnh2,Bzrap1,Lrrc4b,Kcna1,Kcng4,Gnai2,Kcnb1,Kcnj9,Kcns3,Grin2b,Kcnj3,Kcnq3,Abat,Gabrg2,Ptprs,Slitrk4,Kcnmb4,Nlgn3,Prkcb,C…	2.76e-10	8.93e-08	Neuronal System	32.4405
Process	GO:0048667	132	440	10090	10090.ENSMUSP00000000122,10090.ENSMUSP00000000127,10090.ENSMUSP00000000641,10090.ENSMUSP00000001319,10090.ENSMUSP00000002708,10090.ENSMUSP00000004326,10090.ENSMUSP00000004920,10090.ENSMUSP00000009143,10090.ENSMUSP00000017629,10090.ENSMUSP00000017868,10090.ENSMUSP00000018880,10090.ENSMUSP00000020706,10090.ENSMUSP00000021001,10090.ENSMUSP00000021077,10090.ENSMUSP00000022337,10090.ENSMUSP00000022369…	Ngfr,Wnt3,Sema4f,Efnb2,Shh,Plxna3,Ulk2,Bmp7,Top2b,Etv4,Ndel1,Adcy1,Rab10,Slc9a3r1,Cdhr1,Vcl,Dpysl2,Rb1,Alcam,Robo1,Sod1,Smad4,Slit1,Hexa,Farp1,Nptx1,Hprt,Unc5a,Lhx4,Kif5c,Efna3,Nr4a3,Sema3c,Stmn1,Sema3a,Cdk5,Draxin,Sema3d,Uchl1,Wasl,Pvrl1,Isl2,Brsk1,Egr2,Sema7a,Lama1,Lrp1,Ndn,Gbx2,Epha10,Plxnb2,Clrn1,D3Bwg0562e,Flrt3,Erbb2,Cdc42,Dscam,Nog,Flrt2,Neo1,Chl1,Slitrk4,Nlgn3,B4galt6,Epha3,Epha6,Slit3,Zf…	2.76e-10	2.24e-08	Cell morphogenesis involved in neuron differentiation	30
Process	GO:0061564	120	386	10090	10090.ENSMUSP00000000122,10090.ENSMUSP00000000127,10090.ENSMUSP00000000641,10090.ENSMUSP00000001319,10090.ENSMUSP00000002708,10090.ENSMUSP00000004326,10090.ENSMUSP00000004920,10090.ENSMUSP00000009143,10090.ENSMUSP00000017629,10090.ENSMUSP00000017868,10090.ENSMUSP00000018880,10090.ENSMUSP00000020706,10090.ENSMUSP00000021001,10090.ENSMUSP00000022218,10090.ENSMUSP00000022369,10090.ENSMUSP00000022629…	Ngfr,Wnt3,Sema4f,Efnb2,Shh,Plxna3,Ulk2,Bmp7,Top2b,Etv4,Ndel1,Adcy1,Rab10,Dhfr,Vcl,Dpysl2,Nefl,Alcam,Robo1,Tnfrsf21,Smad4,Slit1,Nptx1,Unc5a,Lhx4,Kif5c,Casp6,Efna3,Nr4a3,Sema3c,Stmn1,Sema3a,Cdk5,Draxin,Sema3d,Uchl1,Pvrl1,Isl2,Tspo,Brsk1,Egr2,Sema7a,Lama1,Lrp1,Ndn,Gbx2,Epha10,Plxnb2,D3Bwg0562e,Flrt3,Erbb2,Dscam,Nog,Flrt2,Neo1,Chl1,Slitrk4,Nlgn3,B4galt6,Epha3,Epha6,Slit3,Sema5a,Tubb3,Sema3e,Cdh11,Drd…	3.07e-10	2.44e-08	Axon development	31.0881
Keyword	KW-0449	205	794	10090	10090.ENSMUSP00000000001,10090.ENSMUSP00000000109,10090.ENSMUSP00000000127,10090.ENSMUSP00000000199,10090.ENSMUSP00000001115,10090.ENSMUSP00000001347,10090.ENSMUSP00000001548,10090.ENSMUSP00000001652,10090.ENSMUSP00000002284,10090.ENSMUSP00000002303,10090.ENSMUSP00000002708,10090.ENSMUSP00000003451,10090.ENSMUSP00000007959,10090.ENSMUSP00000009003,10090.ENSMUSP00000014694,10090.ENSMUSP00000014920…	Gnai3,Cntn1,Wnt3,Ncs1,Grk6,Rnd2,Itga3,Bdkrb2,Plaur,Rhoc,Shh,Rnd1,Rhoa,Rala,Zfyve20,Nol3,Camk1g,Adora2b,Gabarap,Ndel1,Avpr1a,Egfr,Gna13,Rab10,Rab37,Cpd,Rab15,Ppm1a,F2rl1,Vcl,Gfra2,Lynx1,Pak2,Tfrc,Cxadr,Sod1,Dhh,Ache,Tnfrsf21,Abcg1,Rhoq,Gnal,Gfra1,Mmp19,Ifitm3,Gria4,Ptp4a1,Cd55,Rab29,Mgst3,Fam129b,Stom,Itga6,Snap25,Stmn2,Wnt2b,Nras,Efna3,Lmna,Abca1,Zdhhc21,Stoml2,Glipr2,Rnf11,Ptp4a2,Rheb,Gabrg1,Uch…	3.26e-10	1.61e-08	Lipoprotein	25.8186
TISSUES	BTO:0000928	110	342	10090	10090.ENSMUSP00000000122,10090.ENSMUSP00000000590,10090.ENSMUSP00000002885,10090.ENSMUSP00000003572,10090.ENSMUSP00000003754,10090.ENSMUSP00000004327,10090.ENSMUSP00000004396,10090.ENSMUSP00000005066,10090.ENSMUSP00000005234,10090.ENSMUSP00000013842,10090.ENSMUSP00000017572,10090.ENSMUSP00000017576,10090.ENSMUSP00000018437,10090.ENSMUSP00000018803,10090.ENSMUSP00000019723,10090.ENSMUSP00000019906…	Ngfr,Rdx,Epdr1,Gars,Calb2,G6pdx,Atp6v1f,Map2k1,Wdr1,Pea15a,Psmd11,Rbfox3,Pfn1,Pnpo,D17Wsu104e,Vip,Nts,Avpr1a,Gnb2l1,Grb2,Fos,Pdhb,Opn4,Cdhr1,Nefm,Nefl,Samm50,Lynx1,Otub1,Gal,Stip1,Hprt,Cops5,Snap25,Napb,Fabp5,Calb1,Akr1a1,Cmpk1,Stmn1,Gabrg1,Fam69a,Rufy3,Npy,Slc17a6,Fem1b,Etfa,Me1,Fam115a,Scai,Pdxk,Ppp1ca,Hnrnpk,Irf2bpl,Arl6ip5,Lonp1,Sncb,Prkx,Ndn,Grhpr,Actr1b,Cops4,Gpi1,Mapk3,Sh3bp1,Cdc42,Crh,Gri…	3.43e-10	4.27e-08	Limbic system	32.1637
COMPARTMENTS	GOCC:0005768	158	566	10090	10090.ENSMUSP00000001963,10090.ENSMUSP00000002100,10090.ENSMUSP00000003550,10090.ENSMUSP00000004173,10090.ENSMUSP00000005066,10090.ENSMUSP00000005256,10090.ENSMUSP00000005798,10090.ENSMUSP00000005952,10090.ENSMUSP00000006467,10090.ENSMUSP00000007757,10090.ENSMUSP00000007959,10090.ENSMUSP00000017783,10090.ENSMUSP00000019354,10090.ENSMUSP00000019939,10090.ENSMUSP00000020329,10090.ENSMUSP00000020420…	Ace,Tmem25,Ncstn,Cdip1,Map2k1,Ndrg1,Snx6,Slc30a4,Arpc2,Tgfbr1,Rhoa,Rab11fip4,Atp6v1e1,Snx3,Egfr,Ap3d1,Nsg2,Rufy1,Laptm4a,Rab10,Grb2,Stx8,F2rl1,Scamp1,Tfrc,Abcg1,Ehd3,Mic1,Slc15a3,Ehd1,Slc1a1,Ifitm3,St8sia2,Ptp4a1,Abcb6,Rab29,Stx6,Snap25,Ehd4,Sppl2a,Cst3,Snx16,Ptpn1,Lrat,Lamtor2,Cd1d1,Abca1,Stx12,Nsg1,Ociad1,Vps33a,Rab35,Snx8,Avl9,Ret,Lrp6,Stx4a,Atp6ap2,Slc9a9,Mvb12a,Vps26b,Ldlr,Anxa2,Snx1,Cmtm6,S…	4.16e-10	2.25e-08	Endosome	27.9152
COMPARTMENTS	GOCC:0030426	70	176	10090	10090.ENSMUSP00000001548,10090.ENSMUSP00000006467,10090.ENSMUSP00000015137,10090.ENSMUSP00000017610,10090.ENSMUSP00000018651,10090.ENSMUSP00000018880,10090.ENSMUSP00000020999,10090.ENSMUSP00000022616,10090.ENSMUSP00000022629,10090.ENSMUSP00000022639,10090.ENSMUSP00000023572,10090.ENSMUSP00000025379,10090.ENSMUSP00000025751,10090.ENSMUSP00000026479,10090.ENSMUSP00000028102,10090.ENSMUSP00000028727…	Itga3,Arpc2,Limk1,Timp2,Trpv2,Ndel1,Kif3c,Clu,Dpysl2,Nefl,Cxadr,Dpysl3,Ighmbp2,Dctn2,Kif5c,Snap25,Stmn2,Ptbp2,Pink1,Cdk5,Rufy3,Fscn1,Fkbp4,Pak1,Fgf13,Gpm6a,Pvrl1,Rasgrf1,Copg2,Ptprf,Cbl,Zfp804a,Sncb,Dicer1,Lrp1,Inpp5j,Trpc5,Flrt3,Basp1,Nrsn1,Dscam,Ywhae,Tubb3,Map2,Arpc5,Eno1,Cdkl5,Usp9x,Erc2,Kif5a,Hap1,Gap43,Rtn4,L1cam,Unc5c,Elavl4,C9orf72,Snx18,Calm1,Arhgef7,Tsc1,Crmp1,Thy1,Dcc,Cfl1,Disc1,Palld,…	5.61e-10	2.96e-08	Growth cone	39.7727
COMPARTMENTS	GOCC:0030427	73	188	10090	10090.ENSMUSP00000001548,10090.ENSMUSP00000006467,10090.ENSMUSP00000015137,10090.ENSMUSP00000017610,10090.ENSMUSP00000018651,10090.ENSMUSP00000018880,10090.ENSMUSP00000020999,10090.ENSMUSP00000022616,10090.ENSMUSP00000022629,10090.ENSMUSP00000022639,10090.ENSMUSP00000023572,10090.ENSMUSP00000025379,10090.ENSMUSP00000025751,10090.ENSMUSP00000026479,10090.ENSMUSP00000028102,10090.ENSMUSP00000028727…	Itga3,Arpc2,Limk1,Timp2,Trpv2,Ndel1,Kif3c,Clu,Dpysl2,Nefl,Cxadr,Dpysl3,Ighmbp2,Dctn2,Kif5c,Snap25,Stmn2,Ptbp2,Pink1,Cdk5,Rufy3,Fscn1,Fkbp4,Pak1,Fgf13,Gpm6a,Pvrl1,Rasgrf1,Copg2,Ptprf,Cbl,Zfp804a,Sncb,Dicer1,Lrp1,Inpp5j,Trpc5,Flrt3,Basp1,Nrsn1,Dscam,Cbfb,Pi4k2a,Ywhae,Tubb3,Map2,Arpc5,Eno1,Cdkl5,Usp9x,Erc2,Kif5a,Hap1,Gap43,Rtn4,L1cam,Unc5c,Elavl4,C9orf72,Snx18,Calm1,Arhgef7,Tsc1,Crmp1,Thy1,Dcc,Cfl1,…	5.66e-10	2.96e-08	Site of polarized growth	38.8298
Component	GO:0099240	86	242	10090	10090.ENSMUSP00000000109,10090.ENSMUSP00000000572,10090.ENSMUSP00000001319,10090.ENSMUSP00000002848,10090.ENSMUSP00000003550,10090.ENSMUSP00000005509,10090.ENSMUSP00000019290,10090.ENSMUSP00000020107,10090.ENSMUSP00000020706,10090.ENSMUSP00000021195,10090.ENSMUSP00000023007,10090.ENSMUSP00000023334,10090.ENSMUSP00000023441,10090.ENSMUSP00000025338,10090.ENSMUSP00000025805,10090.ENSMUSP00000027020…	Cntn1,Gabra2,Efnb2,Grin2d,Ncstn,Stx1a,Cacng2,Atp2b1,Adcy1,Slc6a4,Adcy8,Pvrl3,P2rx6,Gabbr1,Cnih2,Gria4,Snap25,Gabrd,Slc6a6,Slc2a3,Slc6a8,Gpm6a,Pvrl1,Clstn1,Grm1,Htr5a,Ptprf,Kcna2,Psenen,Pcdh8,Dagla,Htr2a,Grin3b,Oprd1,D3Bwg0562e,Lrrc4b,Flrt3,Adra1a,Kcna1,Abhd17b,Adra2c,Kcnj9,Lrrc4,Grin2b,Kcnj3,Gabrg2,Ptprs,Nlgn3,Rgs7bp,Shisa6,Flot2,Drd2,Gria3,Ptpro,Ptpra,Scn1a,Kcnd2,Scn8a,Cacng3,Cntn2,Cntn6,Itgb1,S…	6.19e-10	1.94e-08	Intrinsic component of synaptic membrane	35.5372
Process	GO:0007409	111	351	10090	10090.ENSMUSP00000000122,10090.ENSMUSP00000000127,10090.ENSMUSP00000000641,10090.ENSMUSP00000001319,10090.ENSMUSP00000002708,10090.ENSMUSP00000004326,10090.ENSMUSP00000004920,10090.ENSMUSP00000009143,10090.ENSMUSP00000017629,10090.ENSMUSP00000017868,10090.ENSMUSP00000018880,10090.ENSMUSP00000020706,10090.ENSMUSP00000021001,10090.ENSMUSP00000022369,10090.ENSMUSP00000022629,10090.ENSMUSP00000023312…	Ngfr,Wnt3,Sema4f,Efnb2,Shh,Plxna3,Ulk2,Bmp7,Top2b,Etv4,Ndel1,Adcy1,Rab10,Vcl,Dpysl2,Alcam,Robo1,Smad4,Slit1,Nptx1,Unc5a,Lhx4,Kif5c,Efna3,Nr4a3,Sema3c,Stmn1,Sema3a,Cdk5,Draxin,Sema3d,Uchl1,Pvrl1,Isl2,Brsk1,Egr2,Sema7a,Lama1,Lrp1,Ndn,Gbx2,Epha10,Plxnb2,D3Bwg0562e,Flrt3,Erbb2,Dscam,Nog,Flrt2,Neo1,Chl1,Slitrk4,Nlgn3,B4galt6,Epha3,Epha6,Slit3,Sema5a,Tubb3,Sema3e,Cdh11,Drd2,Arhgap35,Efna5,Ptpro,Map2,Sl…	6.35e-10	4.93e-08	Axonogenesis	31.6239
TISSUES	BTO:0000601	76	201	10090	10090.ENSMUSP00000000590,10090.ENSMUSP00000003572,10090.ENSMUSP00000003754,10090.ENSMUSP00000004327,10090.ENSMUSP00000004396,10090.ENSMUSP00000005066,10090.ENSMUSP00000005234,10090.ENSMUSP00000013842,10090.ENSMUSP00000017572,10090.ENSMUSP00000017576,10090.ENSMUSP00000018437,10090.ENSMUSP00000018803,10090.ENSMUSP00000020640,10090.ENSMUSP00000021090,10090.ENSMUSP00000021674,10090.ENSMUSP00000022268…	Rdx,Gars,Calb2,G6pdx,Atp6v1f,Map2k1,Wdr1,Pea15a,Psmd11,Rbfox3,Pfn1,Pnpo,Gnb2l1,Grb2,Fos,Pdhb,Nefm,Nefl,Samm50,Lynx1,Otub1,Stip1,Hprt,Cops5,Snap25,Napb,Fabp5,Calb1,Akr1a1,Cmpk1,Stmn1,Gabrg1,Fam69a,Rufy3,Etfa,Me1,Scai,Pdxk,Ppp1ca,Hnrnpk,Lonp1,Sncb,Grhpr,Actr1b,Cops4,Mapk3,Sh3bp1,Cdc42,Grin2b,Arhgdia,Ezr,Gabrg2,Gfap,Phgdh,Fabp3,Ywhae,Acot7,Tubb2b,Serpinb1a,Hspa4l,Ftl1,Gad1,Slc5a7,Actb,Dstn,Car4,Mapk…	6.64e-10	7.92e-08	Hippocampus	37.8109
Component	GO:0045211	104	322	10090	10090.ENSMUSP00000000109,10090.ENSMUSP00000000543,10090.ENSMUSP00000000572,10090.ENSMUSP00000000641,10090.ENSMUSP00000001319,10090.ENSMUSP00000002848,10090.ENSMUSP00000003971,10090.ENSMUSP00000005077,10090.ENSMUSP00000007130,10090.ENSMUSP00000019290,10090.ENSMUSP00000020706,10090.ENSMUSP00000021195,10090.ENSMUSP00000023334,10090.ENSMUSP00000023441,10090.ENSMUSP00000023750,10090.ENSMUSP00000024099…	Cntn1,Grasp,Gabra2,Sema4f,Efnb2,Grin2d,Lin7b,Hspb1,Ctnnb1,Cacng2,Adcy1,Slc6a4,Pvrl3,P2rx6,Faim2,Ache,Gabbr1,Cnih2,Farp1,Gria4,Glrb,Grik3,Gabrd,Nsg1,Gabrg1,Slc6a6,Sspn,Atp6ap2,Slc6a8,Cbln1,Clstn1,Grm1,Htr5a,Ptprf,Pacsin1,Pcdh8,Akap9,Dagla,Igsf21,Htr2a,Grin3b,Oprd1,D3Bwg0562e,Lrrc4b,Flrt3,Adra1a,Erbb2,Kcna1,Kctd8,Sigmar1,Abhd17b,Kcnb1,Adra2c,F2r,Lrrc4,Grin2b,Gabrg2,Adam10,Ptprs,Dnm3,Nlgn3,Rgs7bp,Sh…	8.56e-10	2.64e-08	Postsynaptic membrane	32.2981
Process	GO:0090066	155	559	10090	10090.ENSMUSP00000000127,10090.ENSMUSP00000000287,10090.ENSMUSP00000000590,10090.ENSMUSP00000000641,10090.ENSMUSP00000000939,10090.ENSMUSP00000001347,10090.ENSMUSP00000001652,10090.ENSMUSP00000001780,10090.ENSMUSP00000001963,10090.ENSMUSP00000002320,10090.ENSMUSP00000004326,10090.ENSMUSP00000004327,10090.ENSMUSP00000004920,10090.ENSMUSP00000004968,10090.ENSMUSP00000005066,10090.ENSMUSP00000005234…	Wnt3,Scpep1,Rdx,Sema4f,Hip1r,Rnd2,Bdkrb2,Akt1,Ace,Ppard,Plxna3,G6pdx,Ulk2,Plod3,Map2k1,Wdr1,Arpc2,Rhoa,Coro1b,Spire2,Limk1,Xk,Wasf3,Slc12a7,Pfn1,Adora2b,Trpv2,Ndel1,Vip,Atp2b1,Avpr1a,Egfr,Pfn4,Slc9a3r1,Grb2,Slc6a4,Hif1a,Chga,Hmgcr,F2rl1,Dpysl2,Nefm,Nefl,Twf1,Sod1,Arhgap28,Slit1,Cln8,Gsn,Gclm,Gba2,Sema3c,Sema3a,Cdk5,Draxin,Sema3d,Cd38,Rufy3,Wasl,Mtpn,Add2,Ret,Fchsd2,Pak1,Ilk,Fgf13,Ist1,Cx3cl1,Gclc…	9.04e-10	6.9e-08	Regulation of anatomical structure size	27.7281
COMPARTMENTS	GOCC:0099240	83	232	10090	10090.ENSMUSP00000000109,10090.ENSMUSP00000000572,10090.ENSMUSP00000001319,10090.ENSMUSP00000002848,10090.ENSMUSP00000003550,10090.ENSMUSP00000005509,10090.ENSMUSP00000019290,10090.ENSMUSP00000020107,10090.ENSMUSP00000020706,10090.ENSMUSP00000021195,10090.ENSMUSP00000023007,10090.ENSMUSP00000023334,10090.ENSMUSP00000023441,10090.ENSMUSP00000025338,10090.ENSMUSP00000025805,10090.ENSMUSP00000027020…	Cntn1,Gabra2,Efnb2,Grin2d,Ncstn,Stx1a,Cacng2,Atp2b1,Adcy1,Slc6a4,Adcy8,Pvrl3,P2rx6,Gabbr1,Cnih2,Gria4,Snap25,Gabrd,Slc6a6,Slc6a8,Gpm6a,Pvrl1,Clstn1,Grm1,Htr5a,Ptprf,Kcna2,Psenen,Pcdh8,Dagla,Htr2a,Grin3b,Oprd1,D3Bwg0562e,Lrrc4b,Flrt3,Adra1a,Kcna1,Abhd17b,Adra2c,Kcnj9,Lrrc4,Grin2b,Kcnj3,Gabrg2,Ptprs,Nlgn3,Rgs7bp,Shisa6,Flot2,Drd2,Gria3,Ptpro,Scn1a,Kcnd2,Scn8a,Cacng3,Cntn2,Cntn6,Itgb1,Slitrk3,Cacng7…	9.48e-10	4.56e-08	Intrinsic component of synaptic membrane	35.7759
Process	GO:0070201	175	658	10090	10090.ENSMUSP00000000193,10090.ENSMUSP00000000543,10090.ENSMUSP00000001319,10090.ENSMUSP00000001452,10090.ENSMUSP00000001507,10090.ENSMUSP00000001592,10090.ENSMUSP00000002029,10090.ENSMUSP00000002320,10090.ENSMUSP00000002708,10090.ENSMUSP00000003442,10090.ENSMUSP00000004990,10090.ENSMUSP00000005255,10090.ENSMUSP00000006467,10090.ENSMUSP00000009157,10090.ENSMUSP00000014920,10090.ENSMUSP00000017799…	Ccl2,Grasp,Efnb2,Cct3,Cyp51,Jup,Emd,Ppard,Shh,Cacnb3,Mapk14,Wisp1,Arpc2,Dynll1,Nol3,Cd40,Ndel1,Snx3,Mcu,Egfr,Pfkl,Gnb2l1,Srebf1,Rsad2,Dnajc27,Ppm1a,Hif1a,Chga,Hmgcr,F2rl1,Glud1,Rgcc,Cct5,Angpt1,Adcy8,Mief1,Abcg1,Syt4,Pmaip1,Ankrd1,Cpt1a,Cct8,Casp1,Ppm1f,Rab29,Uhmk1,Acvr1c,Stom,Snap25,Ptpn1,Anxa5,Slc7a11,Ppid,Serp1,Txn1,Pink1,Cdk5,Tomm7,Cd38,Rufy3,Cct6a,Aacs,Camk1,Tnfrsf1a,Ipo5,Pak1,Stx4a,Nucb1,Ac…	1.07e-09	8.04e-08	Regulation of establishment of protein localization	26.5957
Process	GO:0010769	108	343	10090	10090.ENSMUSP00000000127,10090.ENSMUSP00000000641,10090.ENSMUSP00000001347,10090.ENSMUSP00000002487,10090.ENSMUSP00000004326,10090.ENSMUSP00000004646,10090.ENSMUSP00000004920,10090.ENSMUSP00000005066,10090.ENSMUSP00000006467,10090.ENSMUSP00000015137,10090.ENSMUSP00000015486,10090.ENSMUSP00000018651,10090.ENSMUSP00000018880,10090.ENSMUSP00000022629,10090.ENSMUSP00000022638,10090.ENSMUSP00000022639…	Wnt3,Sema4f,Rnd2,Braf,Plxna3,Coro1c,Ulk2,Map2k1,Arpc2,Limk1,Xk,Trpv2,Ndel1,Dpysl2,Nefm,Nefl,Robo1,Ache,Slit1,P4hb,Vim,Pdpn,Sema3c,Sema3a,Cdk5,Draxin,Sema3d,Rufy3,Ret,Pak1,Ilk,Fgf13,Ist1,S100a10,Ptprf,Brsk1,Ss18l1,Sema7a,Lrp1,Ttl,Fbxw8,Map3k13,Trpc5,Kndc1,Plxnb2,Ppp3ca,Cdc42,Dscam,Fbxo31,Sipa1l1,Has2,Adam10,Ptprs,Dnm3,Nlgn3,Ep300,Sema5a,Sema3e,Myo5b,Tubb2b,Arhgap35,Efna5,Map2,Numbl,Rac1,Dab2,Synga…	1.31e-09	9.85e-08	Regulation of cell morphogenesis involved in differentiation	31.4869
Process	GO:0007417	238	984	10090	10090.ENSMUSP00000000001,10090.ENSMUSP00000000095,10090.ENSMUSP00000000109,10090.ENSMUSP00000000122,10090.ENSMUSP00000000127,10090.ENSMUSP00000000579,10090.ENSMUSP00000001562,10090.ENSMUSP00000001780,10090.ENSMUSP00000002305,10090.ENSMUSP00000002412,10090.ENSMUSP00000002708,10090.ENSMUSP00000003320,10090.ENSMUSP00000003550,10090.ENSMUSP00000004326,10090.ENSMUSP00000004964,10090.ENSMUSP00000005066…	Gnai3,Tbx2,Cntn1,Ngfr,Wnt3,Sox9,Tulp3,Akt1,Kdm7a,Ncan,Shh,Eif2b5,Ncstn,Plxna3,Pou1f1,Map2k1,Napa,Aplp1,Ctnnb1,Hapln4,Rhoa,Bmp7,Glis2,Wasf3,Top2b,Ndel1,Hdac2,Atp2b1,Ascl1,Avpr1a,Egfr,Btg2,Adcy1,Slc6a4,Hif1a,Shc3,Agtpbp1,Glud1,Clu,Dpysl2,Nefl,Klhl1,Cln5,Bcl2l2,Sharpin,Robo1,Faim2,Syt4,Pfdn1,Bag6,Ighmbp2,Cyp26a1,Slit1,Hprt,Ecrg4,Abcb6,Cln8,Lhx4,Vim,Gsn,Xrn2,Cst3,Snph,Slc7a11,Smad9,Wnt2b,Lef1,Ptbp2,N…	1.97e-09	1.45e-07	Central nervous system development	24.187
TISSUES	BTO:0001355	83	237	10090	10090.ENSMUSP00000000590,10090.ENSMUSP00000003572,10090.ENSMUSP00000003754,10090.ENSMUSP00000004327,10090.ENSMUSP00000004396,10090.ENSMUSP00000005066,10090.ENSMUSP00000005234,10090.ENSMUSP00000013842,10090.ENSMUSP00000017572,10090.ENSMUSP00000017576,10090.ENSMUSP00000018437,10090.ENSMUSP00000018803,10090.ENSMUSP00000020323,10090.ENSMUSP00000020640,10090.ENSMUSP00000021090,10090.ENSMUSP00000021674…	Rdx,Gars,Calb2,G6pdx,Atp6v1f,Map2k1,Wdr1,Pea15a,Psmd11,Rbfox3,Pfn1,Pnpo,Avpr1a,Gnb2l1,Grb2,Fos,Pdhb,Nefm,Nefl,Samm50,Lynx1,Otub1,Stip1,Hprt,Cops5,Snap25,Napb,Fabp5,Calb1,Akr1a1,Cmpk1,Stmn1,Gabrg1,Fam69a,Rufy3,Npy,Slc17a6,Etfa,Me1,Scai,Pdxk,Ppp1ca,Hnrnpk,Arl6ip5,Lonp1,Sncb,Grhpr,Actr1b,Cops4,Mapk3,Sh3bp1,Cdc42,Crh,Grin2b,Arhgdia,Ezr,Gabrg2,Gfap,Phgdh,Fabp3,Ywhae,Acot7,Tubb2b,Serpinb1a,Hspa4l,Map2,…	2.13e-09	2.44e-07	Temporal lobe	35.0211
Process	GO:0048638	117	388	10090	10090.ENSMUSP00000000095,10090.ENSMUSP00000000127,10090.ENSMUSP00000000641,10090.ENSMUSP00000001347,10090.ENSMUSP00000001780,10090.ENSMUSP00000002320,10090.ENSMUSP00000004326,10090.ENSMUSP00000004327,10090.ENSMUSP00000004920,10090.ENSMUSP00000004964,10090.ENSMUSP00000004990,10090.ENSMUSP00000005073,10090.ENSMUSP00000005255,10090.ENSMUSP00000005651,10090.ENSMUSP00000007757,10090.ENSMUSP00000014743…	Tbx2,Wnt3,Sema4f,Rnd2,Akt1,Ppard,Plxna3,G6pdx,Ulk2,Pou1f1,Mapk14,Zp3,Wisp1,Por,Tgfbr1,Csf1,Limk1,Trpv2,Ndel1,Sfrp5,Wwc1,Hdac2,Dusp6,Slc6a4,Lats2,Fgf9,Dpysl2,Cxadr,Sod1,Pim1,Syt4,Slit1,Smad7,Serp1,Sema3c,Sema3a,Cdk5,Draxin,Sema3d,Rufy3,Ybx3,Pak1,Ilk,Sash3,Fgf13,Sfrp1,Ist1,Pin1,Ppib,Six4,Flt3,Hnrnpk,Sema7a,Lrp1,Siah1a,Sh3pxd2b,Npy1r,Dusp10,Ttl,Map3k13,Trpc5,Zfpm2,Ar,Zmpste24,Dscam,Wwc2,Nog,Ezr,Ptpr…	2.22e-09	1.63e-07	Regulation of developmental growth	30.1546
TISSUES	BTO:0000445	98	303	10090	10090.ENSMUSP00000000122,10090.ENSMUSP00000000590,10090.ENSMUSP00000001780,10090.ENSMUSP00000003572,10090.ENSMUSP00000003754,10090.ENSMUSP00000004327,10090.ENSMUSP00000004396,10090.ENSMUSP00000005066,10090.ENSMUSP00000005234,10090.ENSMUSP00000013842,10090.ENSMUSP00000017572,10090.ENSMUSP00000017576,10090.ENSMUSP00000018437,10090.ENSMUSP00000018803,10090.ENSMUSP00000020323,10090.ENSMUSP00000020640…	Ngfr,Rdx,Akt1,Gars,Calb2,G6pdx,Atp6v1f,Map2k1,Wdr1,Pea15a,Psmd11,Rbfox3,Pfn1,Pnpo,Avpr1a,Gnb2l1,Grb2,Fos,Pdhb,Opn4,Cdhr1,Nefm,Nefl,Samm50,Lynx1,Otub1,Stip1,Hprt,Cops5,Snap25,Napb,Fabp5,Calb1,Akr1a1,Cmpk1,Stmn1,Gabrg1,Fam69a,Rufy3,Npy,Slc17a6,Fem1b,Etfa,Me1,Scai,Pdxk,Ppp1ca,Hnrnpk,Irf2bpl,Arl6ip5,Lonp1,Sncb,Grhpr,Actr1b,Cops4,Gpi1,Mapk3,Sh3bp1,Cdc42,Crh,Grin2b,Arhgdia,Ezr,Gabrg2,Gfap,Phgdh,Celf1,F…	2.45e-09	2.69e-07	Cerebral lobe	32.3432
Process	GO:0007610	177	680	10090	10090.ENSMUSP00000001548,10090.ENSMUSP00000001963,10090.ENSMUSP00000002487,10090.ENSMUSP00000002848,10090.ENSMUSP00000003550,10090.ENSMUSP00000006764,10090.ENSMUSP00000008878,10090.ENSMUSP00000019044,10090.ENSMUSP00000019906,10090.ENSMUSP00000020040,10090.ENSMUSP00000020288,10090.ENSMUSP00000020323,10090.ENSMUSP00000020329,10090.ENSMUSP00000020692,10090.ENSMUSP00000020706,10090.ENSMUSP00000021195…	Itga3,Ace,Braf,Grin2d,Ncstn,Aprt,Gprc5b,Slc22a5,Vip,Nts,Eif4ebp2,Avpr1a,Egfr,Btg2,Adcy1,Slc6a4,Hif1a,Fos,Shc3,Agtpbp1,Hexb,Hmgcr,Plk2,Glud1,Opn4,Klhl1,Jph4,Adcy8,Pde1b,Sod1,Asic1,Syt4,Apba1,Cpt1a,Gal,Kcnk4,Hexa,Jph3,Ric8,Hprt,Casp1,Cln8,Parp1,Strbp,Snap25,Cst3,Slc7a11,Glrb,Eif4e,Calb1,Nr4a3,Ppt1,Cdk5,Uchl1,Mmp17,Aldh2,Npy,Pak1,Cckbr,Fgf13,Aff2,Star,Man2b1,Ldlr,Tanc1,Tspo,Grm1,Ube2q1,Brsk1,Fig4,Pr…	3.28e-09	2.37e-07	Behavior	26.0294
Process	GO:0032989	163	611	10090	10090.ENSMUSP00000000122,10090.ENSMUSP00000000127,10090.ENSMUSP00000000641,10090.ENSMUSP00000001127,10090.ENSMUSP00000001319,10090.ENSMUSP00000002708,10090.ENSMUSP00000002889,10090.ENSMUSP00000004326,10090.ENSMUSP00000004920,10090.ENSMUSP00000005066,10090.ENSMUSP00000005234,10090.ENSMUSP00000007130,10090.ENSMUSP00000007959,10090.ENSMUSP00000009143,10090.ENSMUSP00000017629,10090.ENSMUSP00000017868…	Ngfr,Wnt3,Sema4f,Poldip2,Efnb2,Shh,Flii,Plxna3,Ulk2,Map2k1,Wdr1,Ctnnb1,Rhoa,Bmp7,Top2b,Etv4,Ndel1,Egfr,Adcy1,Rab10,Vcl,Clu,Dpysl2,Nefl,Alcam,Robo1,Impact,Smad4,Slit1,Farp1,Nptx1,Hprt,Unc5a,Lhx4,Kif5c,Efna3,Nr4a3,Sema3c,Stmn1,Sema3a,Cdk5,Draxin,Sema3d,Uchl1,Wasl,Cd9,Pak1,Ilk,Wee1,Gpm6a,Pvrl1,Isl2,Snx1,Six4,Snx2,Brsk1,Fig4,Egr2,Fhod3,Sema7a,Dicer1,Lama1,Lrp1,Pacsin1,Ndn,Gpc1,Gbx2,Epha10,Plxnb2,D3Bw…	3.35e-09	2.4e-07	Cellular component morphogenesis	26.6776
COMPARTMENTS	GOCC:0005794	171	652	10090	10090.ENSMUSP00000000001,10090.ENSMUSP00000000058,10090.ENSMUSP00000000122,10090.ENSMUSP00000000895,10090.ENSMUSP00000002063,10090.ENSMUSP00000002708,10090.ENSMUSP00000003117,10090.ENSMUSP00000003550,10090.ENSMUSP00000004968,10090.ENSMUSP00000005218,10090.ENSMUSP00000006828,10090.ENSMUSP00000009219,10090.ENSMUSP00000009234,10090.ENSMUSP00000011400,10090.ENSMUSP00000017851,10090.ENSMUSP00000018711…	Gnai3,Cav2,Ngfr,Necab3,Ap4e1,Shh,Ap1m1,Ncstn,Plod3,Cd44,Aplp1,Cabp7,Ap1b1,Adam19,Serinc3,Gabarap,Ctgf,Lgr5,Ap3d1,Nsg2,Srebf1,Sdc1,Rab10,Cpd,Stx8,Gosr2,Lman2,Fam134b,Cby1,Faim2,Ache,Osbp,Apba1,St8sia2,Rab29,Stx6,Atf6,Ext2,Snap25,Mapre1,Nras,Sec22b,Abca1,Ugcg,B4galt1,Gba2,Glipr2,Adc,Stx12,Lrpap1,Nsg1,Wasl,Npy,St8sia1,Ccdc91,Tnfrsf1a,Qpctl,Rab30,Xylt1,Rab6a,Stx4a,Nucb1,St3gal2,Zdhhc7,Galnt2,St3gal4,…	3.87e-09	1.78e-07	Golgi apparatus	26.227
Component	GO:0099699	79	224	10090	10090.ENSMUSP00000000572,10090.ENSMUSP00000001319,10090.ENSMUSP00000002848,10090.ENSMUSP00000003550,10090.ENSMUSP00000005509,10090.ENSMUSP00000019290,10090.ENSMUSP00000020107,10090.ENSMUSP00000020706,10090.ENSMUSP00000021195,10090.ENSMUSP00000023007,10090.ENSMUSP00000023334,10090.ENSMUSP00000023441,10090.ENSMUSP00000025338,10090.ENSMUSP00000025805,10090.ENSMUSP00000027020,10090.ENSMUSP00000030925…	Gabra2,Efnb2,Grin2d,Ncstn,Stx1a,Cacng2,Atp2b1,Adcy1,Slc6a4,Adcy8,Pvrl3,P2rx6,Gabbr1,Cnih2,Gria4,Gabrd,Slc6a6,Slc2a3,Slc6a8,Gpm6a,Pvrl1,Clstn1,Grm1,Htr5a,Ptprf,Kcna2,Psenen,Pcdh8,Dagla,Htr2a,Grin3b,Oprd1,D3Bwg0562e,Lrrc4b,Flrt3,Adra1a,Kcna1,Adra2c,Kcnj9,Lrrc4,Grin2b,Kcnj3,Gabrg2,Ptprs,Nlgn3,Shisa6,Drd2,Gria3,Ptpro,Ptpra,Scn1a,Kcnd2,Scn8a,Cacng3,Itgb1,Slitrk3,Cacng7,Slitrk1,Rtn4,Ephb2,Gabbr2,Kcnc3,…	4e-09	1.21e-07	Integral component of synaptic membrane	35.2679
Process	GO:0044087	235	978	10090	10090.ENSMUSP00000000542,10090.ENSMUSP00000000579,10090.ENSMUSP00000000590,10090.ENSMUSP00000000939,10090.ENSMUSP00000001963,10090.ENSMUSP00000002303,10090.ENSMUSP00000002487,10090.ENSMUSP00000004202,10090.ENSMUSP00000004646,10090.ENSMUSP00000005279,10090.ENSMUSP00000005509,10090.ENSMUSP00000006181,10090.ENSMUSP00000006467,10090.ENSMUSP00000006912,10090.ENSMUSP00000007757,10090.ENSMUSP00000007959…	Acvrl1,Sox9,Rdx,Hip1r,Ace,Rhoc,Braf,Dnmt1,Coro1c,Klf5,Stx1a,Napa,Arpc2,Pip4k2a,Tgfbr1,Rhoa,Coro1b,Rala,Bmp7,Dynll1,Spire2,Pip4k2c,Nol3,Limk1,Setdb1,Wasf3,Pfn1,Pip4k2b,G3bp1,Ndel1,Fxr2,Hdac2,Ctgf,Gnb2l1,Drg1,Sdc1,Pfn4,Sh3yl1,Grb2,Ppm1a,Chga,F2rl1,Plk2,Vdac2,Vcl,Psmc6,Dnajc15,Rgcc,Clu,Twf1,Atg3,Pak2,Tfrc,Arhgap28,Eif2ak2,Rhoq,Riok3,Impact,Dpysl3,Smad4,Fas,Ppp2r5b,Slit1,Farp1,Nptx1,Podxl,Ppm1f,Parp1…	4.07e-09	2.88e-07	Regulation of cellular component biogenesis	24.0286
Process	GO:0051223	166	630	10090	10090.ENSMUSP00000000193,10090.ENSMUSP00000000543,10090.ENSMUSP00000001319,10090.ENSMUSP00000001507,10090.ENSMUSP00000001592,10090.ENSMUSP00000002029,10090.ENSMUSP00000002320,10090.ENSMUSP00000002708,10090.ENSMUSP00000003442,10090.ENSMUSP00000004990,10090.ENSMUSP00000005255,10090.ENSMUSP00000006467,10090.ENSMUSP00000009157,10090.ENSMUSP00000014920,10090.ENSMUSP00000017799,10090.ENSMUSP00000018880…	Ccl2,Grasp,Efnb2,Cyp51,Jup,Emd,Ppard,Shh,Cacnb3,Mapk14,Wisp1,Arpc2,Dynll1,Nol3,Cd40,Ndel1,Snx3,Mcu,Egfr,Pfkl,Gnb2l1,Srebf1,Rsad2,Dnajc27,Ppm1a,Hif1a,Chga,Hmgcr,F2rl1,Glud1,Rgcc,Angpt1,Adcy8,Mief1,Abcg1,Syt4,Pmaip1,Ankrd1,Cpt1a,Casp1,Ppm1f,Rab29,Uhmk1,Acvr1c,Stom,Ptpn1,Anxa5,Slc7a11,Ppid,Serp1,Txn1,Pink1,Cdk5,Tomm7,Cd38,Rufy3,Aacs,Camk1,Tnfrsf1a,Ipo5,Pak1,Stx4a,Nucb1,Acsl4,Sfrp1,Cx3cl1,Tmem30a,Sca…	4.99e-09	3.48e-07	Regulation of protein transport	26.3492
COMPARTMENTS	GOCC:0099699	76	213	10090	10090.ENSMUSP00000000572,10090.ENSMUSP00000001319,10090.ENSMUSP00000002848,10090.ENSMUSP00000003550,10090.ENSMUSP00000005509,10090.ENSMUSP00000019290,10090.ENSMUSP00000020107,10090.ENSMUSP00000020706,10090.ENSMUSP00000021195,10090.ENSMUSP00000023007,10090.ENSMUSP00000023334,10090.ENSMUSP00000023441,10090.ENSMUSP00000025338,10090.ENSMUSP00000025805,10090.ENSMUSP00000027020,10090.ENSMUSP00000030925…	Gabra2,Efnb2,Grin2d,Ncstn,Stx1a,Cacng2,Atp2b1,Adcy1,Slc6a4,Adcy8,Pvrl3,P2rx6,Gabbr1,Cnih2,Gria4,Gabrd,Slc6a6,Slc6a8,Gpm6a,Pvrl1,Clstn1,Grm1,Htr5a,Ptprf,Kcna2,Psenen,Pcdh8,Dagla,Htr2a,Grin3b,Oprd1,D3Bwg0562e,Lrrc4b,Flrt3,Adra1a,Kcna1,Adra2c,Kcnj9,Lrrc4,Grin2b,Kcnj3,Gabrg2,Ptprs,Nlgn3,Shisa6,Drd2,Gria3,Ptpro,Scn1a,Kcnd2,Scn8a,Cacng3,Itgb1,Slitrk3,Cacng7,Slitrk1,Rtn4,Ephb2,Gabbr2,Kcnc3,Lrfn1,Cadm3,G…	5.22e-09	2.35e-07	Integral component of synaptic membrane	35.6808
COMPARTMENTS	GOCC:0005783	193	767	10090	10090.ENSMUSP00000000058,10090.ENSMUSP00000000122,10090.ENSMUSP00000000127,10090.ENSMUSP00000000193,10090.ENSMUSP00000000642,10090.ENSMUSP00000000895,10090.ENSMUSP00000001479,10090.ENSMUSP00000001507,10090.ENSMUSP00000002029,10090.ENSMUSP00000002708,10090.ENSMUSP00000003550,10090.ENSMUSP00000004137,10090.ENSMUSP00000004968,10090.ENSMUSP00000005066,10090.ENSMUSP00000006027,10090.ENSMUSP00000006557…	Cav2,Ngfr,Wnt3,Ccl2,Hk2,Necab3,Kpnb1,Cyp51,Emd,Shh,Ncstn,Gstm7,Plod3,Map2k1,Reep5,Elovl1,Nol3,Cers2,Foxred2,Ghdc,Gabarap,Srebf1,Rsad2,Rab10,Sgpp1,Fos,Ryr2,Caml,Hmgcr,Txndc16,Ero1l,Clu,Loxl2,Cln5,Jph4,Fam134b,Pdia5,Faim2,Cers5,Ache,Agpat4,Xdh,Vapa,Tap2,P4hb,Scd2,Prdx4,Jph3,Rdh5,Ifitm3,Cln8,Atf6,Stom,Agpat2,Dnajc10,Hsd17b12,Ext2,Ptpn1,Sec62,Anxa5,Slc7a11,Lrat,Cd1d1,Vcp,Gba2,Txndc12,Cyp2j6,Pink1,Tme…	5.87e-09	2.59e-07	Endoplasmic reticulum	25.163
Process	GO:0001558	124	429	10090	10090.ENSMUSP00000000127,10090.ENSMUSP00000000542,10090.ENSMUSP00000000641,10090.ENSMUSP00000001347,10090.ENSMUSP00000001780,10090.ENSMUSP00000002320,10090.ENSMUSP00000004326,10090.ENSMUSP00000004327,10090.ENSMUSP00000004920,10090.ENSMUSP00000005218,10090.ENSMUSP00000005255,10090.ENSMUSP00000005647,10090.ENSMUSP00000007757,10090.ENSMUSP00000007959,10090.ENSMUSP00000008528,10090.ENSMUSP00000015137…	Wnt3,Acvrl1,Sema4f,Rnd2,Akt1,Ppard,Plxna3,G6pdx,Ulk2,Cd44,Wisp1,Ndufs3,Tgfbr1,Rhoa,Sertad1,Limk1,Trpv2,Ndel1,Avpr1a,Egfr,Gnb2l1,Igfbp3,Dpysl2,Rb1,Bcl6,Syt4,Smad4,Smarca2,Slit1,Smad7,Frzb,Lef1,Lamtor2,Sdcbp,Ppt1,Cda,Sema3c,Slc9a1,Sema3a,Cdk5,Draxin,Sema3d,Cd38,Cgref1,Rufy3,Mtpn,Pak1,Ilk,Fgf13,Acsl4,Sfrp1,Ist1,Pin1,Hsd3b7,Clstn1,Hnrnpk,Dcbld2,Sema7a,Exosc2,Cd81,Lrp1,AF529169,Ttl,Map3k13,Trpc5,Erbb2…	6.01e-09	4.12e-07	Regulation of cell growth	28.9044
COMPARTMENTS	GOCC:0098978	83	244	10090	10090.ENSMUSP00000000199,10090.ENSMUSP00000001319,10090.ENSMUSP00000002848,10090.ENSMUSP00000004990,10090.ENSMUSP00000005509,10090.ENSMUSP00000007959,10090.ENSMUSP00000009538,10090.ENSMUSP00000018909,10090.ENSMUSP00000019290,10090.ENSMUSP00000022894,10090.ENSMUSP00000023441,10090.ENSMUSP00000025110,10090.ENSMUSP00000025338,10090.ENSMUSP00000025805,10090.ENSMUSP00000025830,10090.ENSMUSP00000026670…	Ncs1,Efnb2,Grin2d,Mapk14,Stx1a,Rhoa,Syn2,Fxr2,Cacng2,Ywhaz,P2rx6,Syt4,Gabbr1,Cnih2,Apba1,Nptx1,Gria4,Snap25,Eif4e,Calb1,Grik3,Rheb,Cdk5,Gabrd,Sparcl1,Acan,Cbln1,Bsn,Clstn1,Grm1,Cplx1,Pacsin1,Pcdh8,Camk4,Htr2a,Flrt3,Adra1a,Kcna1,Grin2b,Gabrg2,Adam10,Ptprs,Dnm3,Nlgn3,Shisa6,Nptx2,Drd2,Gria3,Homer1,Htt,Rac1,Syngap1,Kcnd2,Scn8a,Cdkl5,Itgb1,Erc2,Bcan,Stxbp1,Slitrk1,Actb,Cttn,Rtn4,Ephb2,Elavl4,Gabbr2,S…	6.33e-09	2.74e-07	Glutamatergic synapse	34.0164
Process	GO:0007155	188	744	10090	10090.ENSMUSP00000000109,10090.ENSMUSP00000000299,10090.ENSMUSP00000000579,10090.ENSMUSP00000001319,10090.ENSMUSP00000001548,10090.ENSMUSP00000001592,10090.ENSMUSP00000002320,10090.ENSMUSP00000002412,10090.ENSMUSP00000002885,10090.ENSMUSP00000003061,10090.ENSMUSP00000005218,10090.ENSMUSP00000005255,10090.ENSMUSP00000005532,10090.ENSMUSP00000006828,10090.ENSMUSP00000007130,10090.ENSMUSP00000007738…	Cntn1,Itgb2,Sox9,Efnb2,Itga3,Jup,Ppard,Ncan,Epdr1,Bcam,Cd44,Wisp1,Nid1,Aplp1,Ctnnb1,Hapln4,Rhoa,Bmp7,Lama5,Lamb3,Myh9,Cd164,Ctgf,Ntn4,Nuak1,Egfr,Cdhr1,Vcl,Angpt1,Alcam,Pvrl3,Lmln,Cxadr,Robo1,Sympk,Ache,Cyp1b1,Itgb8,Ric8,Podxl,Mkln1,Itga6,Slc7a11,Lef1,Thbs3,Cyr61,B4galt1,Tln1,Pdpn,Cdk5,Cgref1,Sparcl1,Add2,Ret,Olr1,Lrp6,Cd9,Hapln3,Acan,Lyve1,Ilk,Sfrp1,Cbln1,Cx3cl1,Cdh5,Pvrl1,Mcam,Nt5e,Cntnap5a,Lpp,…	7.12e-09	4.86e-07	Cell adhesion	25.2688
COMPARTMENTS	GOCC:0031252	104	338	10090	10090.ENSMUSP00000000122,10090.ENSMUSP00000000572,10090.ENSMUSP00000000590,10090.ENSMUSP00000000939,10090.ENSMUSP00000004646,10090.ENSMUSP00000005218,10090.ENSMUSP00000006467,10090.ENSMUSP00000007130,10090.ENSMUSP00000007959,10090.ENSMUSP00000008893,10090.ENSMUSP00000015137,10090.ENSMUSP00000016143,10090.ENSMUSP00000016771,10090.ENSMUSP00000018651,10090.ENSMUSP00000018880,10090.ENSMUSP00000018993…	Ngfr,Gabra2,Rdx,Hip1r,Coro1c,Cd44,Arpc2,Ctnnb1,Rhoa,Coro1b,Limk1,Wasf3,Myh9,Trpv2,Ndel1,Wwc1,Atp2b1,Sh3yl1,Nme2,Ywhaz,Robo1,Gabbr1,Dpysl3,P4hb,Podxl,Mkln1,Unc5a,Vim,Gsn,Snap25,Stmn2,Pdpn,Cdk5,Tesc,Fscn1,Wasl,Gabarapl1,Rps3,Pak1,Stx4a,Ilk,Sh3rf1,Anxa2,Vezt,Jcad,Snx2,Kcna2,Asap3,Eef1a1,Pacsin1,Dagla,Oprd1,Mtss1l,Sh3bp1,Clrn1,Eps8,Cdc42,Arf6,Kcnb1,Abi3,Ezr,Gabrg2,Slc39a6,Ldb2,Jmy,Tubb3,Tmod3,Flot2,M…	7.2e-09	3.06e-07	Cell leading edge	30.7692
Process	GO:0050770	73	203	10090	10090.ENSMUSP00000000127,10090.ENSMUSP00000000641,10090.ENSMUSP00000001347,10090.ENSMUSP00000002487,10090.ENSMUSP00000004326,10090.ENSMUSP00000004920,10090.ENSMUSP00000005066,10090.ENSMUSP00000015137,10090.ENSMUSP00000015486,10090.ENSMUSP00000018651,10090.ENSMUSP00000018880,10090.ENSMUSP00000022629,10090.ENSMUSP00000022638,10090.ENSMUSP00000022639,10090.ENSMUSP00000023600,10090.ENSMUSP00000024099…	Wnt3,Sema4f,Rnd2,Braf,Plxna3,Ulk2,Map2k1,Limk1,Xk,Trpv2,Ndel1,Dpysl2,Nefm,Nefl,Robo1,Ache,Slit1,Vim,Sema3c,Sema3a,Cdk5,Draxin,Sema3d,Rufy3,Ret,Pak1,Ilk,Fgf13,Ist1,Brsk1,Sema7a,Lrp1,Ttl,Map3k13,Trpc5,Plxnb2,Dscam,Sipa1l1,Ptprs,Ep300,Sema5a,Sema3e,Myo5b,Tubb2b,Arhgap35,Efna5,Map2,Syngap1,Cntn2,Cdkl5,Adnp,Rgma,Snap91,Plxnc1,Slitrk1,Cttn,Rtn4,L1cam,Ephb2,Amigo1,Dab1,Tnr,Thy1,Plxna4,Disc1,Rnf6,Slit2,S…	7.98e-09	5.38e-07	Regulation of axonogenesis	35.9606
Component	GO:0070161	164	626	10090	10090.ENSMUSP00000000058,10090.ENSMUSP00000000122,10090.ENSMUSP00000000299,10090.ENSMUSP00000000590,10090.ENSMUSP00000001319,10090.ENSMUSP00000001592,10090.ENSMUSP00000001780,10090.ENSMUSP00000002889,10090.ENSMUSP00000003451,10090.ENSMUSP00000003717,10090.ENSMUSP00000003754,10090.ENSMUSP00000003971,10090.ENSMUSP00000005066,10090.ENSMUSP00000005234,10090.ENSMUSP00000005256,10090.ENSMUSP00000006467…	Cav2,Ngfr,Itgb2,Rdx,Efnb2,Jup,Akt1,Flii,Rnd1,Abcb4,Calb2,Lin7b,Map2k1,Wdr1,Ndrg1,Arpc2,Ctnnb1,Tgfbr1,Rhoa,Rala,Limk1,Myh9,Grb2,Slc6a4,Vcl,Twf1,Pvrl3,Pak2,Lmln,Klhl24,Cxadr,Sympk,Vapa,Limd1,Itgb8,Podxl,Smad7,Dcaf6,Rsu1,Fam129b,Itga6,Jag1,Mapre1,Anxa5,Cpne3,Sdcbp,B4galt1,Epb4.1l4b,Tln1,Slc2a1,Slc9a1,Fscn1,Ybx3,Pak1,Ilk,Fgf13,Cdh5,Pvrl1,Clmp,Rexo2,Lpp,Gak,Cdh6,Kcnj2,Vezt,Cib2,Jcad,Ppp1ca,Kirrel2,Atp…	8.61e-09	2.56e-07	Anchoring junction	26.1981
Component	GO:0098936	66	175	10090	10090.ENSMUSP00000000109,10090.ENSMUSP00000000572,10090.ENSMUSP00000001319,10090.ENSMUSP00000002848,10090.ENSMUSP00000019290,10090.ENSMUSP00000020706,10090.ENSMUSP00000021195,10090.ENSMUSP00000023334,10090.ENSMUSP00000023441,10090.ENSMUSP00000025338,10090.ENSMUSP00000025805,10090.ENSMUSP00000027020,10090.ENSMUSP00000030925,10090.ENSMUSP00000032185,10090.ENSMUSP00000033752,10090.ENSMUSP00000036962…	Cntn1,Gabra2,Efnb2,Grin2d,Cacng2,Adcy1,Slc6a4,Pvrl3,P2rx6,Gabbr1,Cnih2,Gria4,Gabrd,Slc6a6,Slc6a8,Clstn1,Grm1,Htr5a,Ptprf,Pcdh8,Dagla,Htr2a,Grin3b,Oprd1,D3Bwg0562e,Lrrc4b,Flrt3,Adra1a,Kcna1,Abhd17b,Adra2c,Lrrc4,Grin2b,Gabrg2,Ptprs,Nlgn3,Rgs7bp,Shisa6,Drd2,Gria3,Ptpro,Kcnd2,Scn8a,Cacng3,Cntn2,Itgb1,Slitrk3,Cacng7,Slitrk1,Rtn4,Ephb2,Gabbr2,Kcnc3,Lrfn1,Grik4,Dcc,Grin2a,Erbb4,Lrrtm1,Abhd6,Slitrk2,Ncam…	9.32e-09	2.72e-07	Intrinsic component of postsynaptic membrane	37.7143
Component	GO:0045121	116	396	10090	10090.ENSMUSP00000000001,10090.ENSMUSP00000000058,10090.ENSMUSP00000000109,10090.ENSMUSP00000000122,10090.ENSMUSP00000000299,10090.ENSMUSP00000001566,10090.ENSMUSP00000002708,10090.ENSMUSP00000003717,10090.ENSMUSP00000004646,10090.ENSMUSP00000007130,10090.ENSMUSP00000007757,10090.ENSMUSP00000008878,10090.ENSMUSP00000020107,10090.ENSMUSP00000020329,10090.ENSMUSP00000020706,10090.ENSMUSP00000021077…	Gnai3,Cav2,Cntn1,Ngfr,Itgb2,Tubb5,Shh,Abcb4,Coro1c,Ctnnb1,Tgfbr1,Gprc5b,Atp2b1,Egfr,Adcy1,Slc9a3r1,Slc6a4,Adcy2,Vdac2,Vcl,Angpt1,Adcy8,Cxadr,Faim2,Rhoq,Gabbr1,Fas,Podxl,Unc5a,Cd55,Stom,Snap25,Spred1,Mall,Lamtor2,Bcl10,Sdcbp,Abca1,Stoml2,Pdpn,Tnfrsf1b,Slc2a1,Ppt1,Slc9a1,Stx12,Abcg2,Add2,Ret,Olr1,Lrp6,Ldhb,Slc2a3,Tnfrsf1a,Ldlr,Anxa2,Stoml1,Atp1b3,S100a10,Atp1a1,Prkar2b,Fam198a,Cbl,Efhd2,Prkcdbp,Myo…	1e-08	2.88e-07	Membrane raft	29.2929
Process	GO:0071407	140	511	10090	10090.ENSMUSP00000000001,10090.ENSMUSP00000000186,10090.ENSMUSP00000000193,10090.ENSMUSP00000001592,10090.ENSMUSP00000001780,10090.ENSMUSP00000002320,10090.ENSMUSP00000002466,10090.ENSMUSP00000003550,10090.ENSMUSP00000003717,10090.ENSMUSP00000004137,10090.ENSMUSP00000005279,10090.ENSMUSP00000006467,10090.ENSMUSP00000006828,10090.ENSMUSP00000007130,10090.ENSMUSP00000007959,10090.ENSMUSP00000009143…	Gnai3,Fgf23,Ccl2,Jup,Akt1,Ppard,Nr2f6,Ncstn,Abcb4,Gstm7,Klf5,Arpc2,Aplp1,Ctnnb1,Rhoa,Bmp7,Elk1,Rxrg,Top2b,Hdac2,Atp2b1,Egfr,Nsg2,Adcy1,Ddx5,Slc9a3r1,Slc6a4,Ryr2,Adcy2,Bcl2l2,Adcy8,Vdr,Pak2,Atp5o,Sod1,Calcoco1,Pim1,Cyp1b1,Riok3,Impact,Gnal,Gna14,Ankrd1,Esrrg,Itga6,Fam210b,Smad9,Lef1,Casp6,Gclm,Eif4e,Abca1,Nr4a3,Slc9a1,Casp9,Nsg1,Aacs,Lrp6,Fkbp4,Nr2f2,Pak1,Sfrp1,Star,Tmem38a,Gclc,Rxrb,Abhd2,Cib2,Pc…	1.1e-08	7.36e-07	Cellular response to organic cyclic compound	27.3973
Process	GO:0007264	90	279	10090	10090.ENSMUSP00000000122,10090.ENSMUSP00000001347,10090.ENSMUSP00000001479,10090.ENSMUSP00000002303,10090.ENSMUSP00000003451,10090.ENSMUSP00000004202,10090.ENSMUSP00000007959,10090.ENSMUSP00000009003,10090.ENSMUSP00000015841,10090.ENSMUSP00000020643,10090.ENSMUSP00000020930,10090.ENSMUSP00000020986,10090.ENSMUSP00000021001,10090.ENSMUSP00000021076,10090.ENSMUSP00000021090,10090.ENSMUSP00000021459…	Ngfr,Rnd2,Kpnb1,Rhoc,Rnd1,Dnmt1,Rhoa,Rala,Setdb1,Rufy1,Gna13,Dnajc27,Rab10,Rab37,Grb2,Rab15,Plk2,Rhobtb2,Rb1,Bcl6,Rhoq,Arhgdig,Chm,Rab29,Rgl1,Rsu1,Nras,Rit1,Sdcbp,Pdpn,Rheb,Brap,Rab35,Rab30,Rab6a,Nucb1,Dock11,Rasgrf1,Mras,Rab6b,Vav3,Dhcr24,Rabif,Rhov,Rras,Sgsm3,Tax1bp3,Dock3,Dock9,Kndc1,Eps8,Cdc42se1,Cdc42,Rhoj,Cdc42ep2,Vav2,Arhgdia,Rab39,Rab7b,Rap1b,Sos1,Rab31,Rras2,Nf1,Rac1,Syngap1,Wasf2,Hrasls…	1.2e-08	7.98e-07	Small gtpase mediated signal transduction	32.2581
TISSUES	BTO:0004725	100	325	10090	10090.ENSMUSP00000000767,10090.ENSMUSP00000002029,10090.ENSMUSP00000004202,10090.ENSMUSP00000005826,10090.ENSMUSP00000006235,10090.ENSMUSP00000011400,10090.ENSMUSP00000016771,10090.ENSMUSP00000017188,10090.ENSMUSP00000017629,10090.ENSMUSP00000018727,10090.ENSMUSP00000019911,10090.ENSMUSP00000020339,10090.ENSMUSP00000020522,10090.ENSMUSP00000020640,10090.ENSMUSP00000021062,10090.ENSMUSP00000021077…	Rpa1,Emd,Dnmt1,Cs,Ctsb,Adam19,Myh9,Serpinb6a,Top2b,G3bp1,Hdac2,Tbc1d15,Pfkl,Gnb2l1,Ddx5,Slc9a3r1,Npc2,Sdha,Dhfr,Vdac2,Vcl,Tkt,Angpt1,Tfrc,Sod1,Smarca2,Rela,P4hb,Huwe1,Hprt,Mcm6,Parp1,Vim,Gsn,Xrn2,Anxa5,Lmna,Txn1,Vcp,Tln1,Stmn1,Slc9a1,Cdk5,Fosl2,Aldh2,Wasl,Ilk,Nono,Anxa2,S100a10,Hnrnpk,Eef1a1,Wdr48,Ddx21,Lrp1,Hist1h1c,Ptges3,Mapk3,Hist1h1e,Samhd1,Arhgdia,Atpif1,Junb,Phgdh,Khdrbs1,Ep300,Yap1,Ybx1,E…	1.39e-08	1.41e-06	Embryonic fibroblast	30.7692
Process	GO:0061024	158	603	10090	10090.ENSMUSP00000000001,10090.ENSMUSP00000000058,10090.ENSMUSP00000000299,10090.ENSMUSP00000000642,10090.ENSMUSP00000000939,10090.ENSMUSP00000001780,10090.ENSMUSP00000003717,10090.ENSMUSP00000004646,10090.ENSMUSP00000004868,10090.ENSMUSP00000005256,10090.ENSMUSP00000005509,10090.ENSMUSP00000007959,10090.ENSMUSP00000009727,10090.ENSMUSP00000010298,10090.ENSMUSP00000014920,10090.ENSMUSP00000015725…	Gnai3,Cav2,Itgb2,Hk2,Hip1r,Akt1,Abcb4,Coro1c,Mtfp1,Ndrg1,Stx1a,Rhoa,Syngr1,Spire2,Nol3,Bnip1,Slmo2,Myh9,Ndel1,Snx3,Hebp2,Ap3d1,Slc9a3r1,Stx8,Gosr2,Npc2,Clu,Bcl2l2,Samm50,Mpv17l,Sod1,Abcg1,Vapa,Syt4,Stard4,Bag6,Pmaip1,Osbp,Apool,Cln8,Stx6,Gsn,Snap25,Snph,Sec22b,Glrb,Lmna,Apoa1bp,Ubxn2b,Abca1,Ugcg,Gba2,Ppt1,Adc,Slc9a1,Stx12,Ankle2,Wasl,Tmem43,Cd9,Fchsd2,Stx4a,Star,Anxa2,Tmem30a,Gclc,Reep2,Vav3,Gak,…	1.6e-08	1.04e-06	Membrane organization	26.2023
COMPARTMENTS	GOCC:0098936	65	174	10090	10090.ENSMUSP00000000109,10090.ENSMUSP00000000572,10090.ENSMUSP00000001319,10090.ENSMUSP00000002848,10090.ENSMUSP00000019290,10090.ENSMUSP00000020706,10090.ENSMUSP00000021195,10090.ENSMUSP00000023334,10090.ENSMUSP00000023441,10090.ENSMUSP00000025338,10090.ENSMUSP00000025805,10090.ENSMUSP00000027020,10090.ENSMUSP00000030925,10090.ENSMUSP00000032185,10090.ENSMUSP00000033752,10090.ENSMUSP00000036962…	Cntn1,Gabra2,Efnb2,Grin2d,Cacng2,Adcy1,Slc6a4,Pvrl3,P2rx6,Gabbr1,Cnih2,Gria4,Gabrd,Slc6a6,Slc6a8,Clstn1,Grm1,Htr5a,Ptprf,Pcdh8,Dagla,Htr2a,Grin3b,Oprd1,D3Bwg0562e,Lrrc4b,Flrt3,Adra1a,Kcna1,Abhd17b,Adra2c,Lrrc4,Grin2b,Gabrg2,Ptprs,Nlgn3,Rgs7bp,Shisa6,Drd2,Gria3,Ptpro,Kcnd2,Scn8a,Cacng3,Cntn2,Itgb1,Slitrk3,Cacng7,Slitrk1,Rtn4,Ephb2,Gabbr2,Kcnc3,Lrfn1,Grik4,Dcc,Grin2a,Erbb4,Lrrtm1,Abhd6,Slitrk2,Ncam…	1.61e-08	6.71e-07	Intrinsic component of postsynaptic membrane	37.3563
Component	GO:0031252	124	438	10090	10090.ENSMUSP00000000122,10090.ENSMUSP00000000572,10090.ENSMUSP00000000590,10090.ENSMUSP00000000939,10090.ENSMUSP00000001809,10090.ENSMUSP00000004646,10090.ENSMUSP00000005218,10090.ENSMUSP00000006467,10090.ENSMUSP00000007130,10090.ENSMUSP00000007959,10090.ENSMUSP00000008893,10090.ENSMUSP00000015137,10090.ENSMUSP00000016143,10090.ENSMUSP00000016771,10090.ENSMUSP00000018651,10090.ENSMUSP00000018880…	Ngfr,Gabra2,Rdx,Hip1r,Pabpc1,Coro1c,Cd44,Arpc2,Ctnnb1,Rhoa,Coro1b,Limk1,Wasf3,Myh9,Trpv2,Ndel1,Wwc1,Atp2b1,Sh3yl1,Slc9a3r1,Nme2,Spry2,Ywhaz,Robo1,Gabbr1,Dpysl3,P4hb,Podxl,Mkln1,Unc5a,Vim,Gsn,Snap25,Stmn2,S100a11,Tln1,Pdpn,Cdk5,Gabrg1,Rufy3,Tesc,Fscn1,Wasl,Gabarapl1,Rps3,Pak1,Stx4a,Ilk,Atp6ap2,Klhl2,Sh3rf1,Anxa2,Snx1,Vezt,Jcad,Snx2,Plekhh2,Kcna2,Asap3,Eef1a1,Cdc42bpb,Pacsin1,Dagla,Inpp5j,Acta2,Opr…	1.63e-08	4.45e-07	Cell leading edge	28.3105
WikiPathways	WP65	61	158	10090	10090.ENSMUSP00000001780,10090.ENSMUSP00000003964,10090.ENSMUSP00000004990,10090.ENSMUSP00000005066,10090.ENSMUSP00000009550,10090.ENSMUSP00000020522,10090.ENSMUSP00000020949,10090.ENSMUSP00000021090,10090.ENSMUSP00000021674,10090.ENSMUSP00000021898,10090.ENSMUSP00000024575,10090.ENSMUSP00000024956,10090.ENSMUSP00000025684,10090.ENSMUSP00000025749,10090.ENSMUSP00000025897,10090.ENSMUSP00000028252…	Akt1,Gys1,Mapk14,Map2k1,Elk1,Pfkl,Map2k6,Grb2,Fos,Shc3,Rps6ka2,Rhoq,Ehd1,Rps6kb2,Map4k2,Grb14,Snap25,Ptpn1,Eif4e,Prkaa2,Slc2a1,Map3k6,Rheb,Stx4a,Ptprf,Mapk6,Map2k4,Trib3,Map3k9,Cbl,Rps6ka5,Map3k13,Mapk3,Arf6,Pik3r1,Socs3,Rhoj,Pik3cg,Sos1,Prkcb,Flot2,Rac1,Mapk11,Mekk4,Insr,Stxbp1,Mapk4,Grb10,Shc1,Map3k2,Ehd2,Sorbs1,Jun,Map4k5,Mapk10,Tsc1,Cyth3,Rab4a,Sgk1,Map4k4,Shc2	1.68e-08	3.34e-06	Insulin signaling	38.6076
Component	GO:0043209	74	212	10090	10090.ENSMUSP00000000090,10090.ENSMUSP00000000109,10090.ENSMUSP00000000590,10090.ENSMUSP00000001452,10090.ENSMUSP00000005234,10090.ENSMUSP00000005256,10090.ENSMUSP00000005647,10090.ENSMUSP00000006181,10090.ENSMUSP00000009003,10090.ENSMUSP00000009538,10090.ENSMUSP00000011896,10090.ENSMUSP00000021217,10090.ENSMUSP00000022062,10090.ENSMUSP00000022293,10090.ENSMUSP00000022529,10090.ENSMUSP00000022629…	Cox5a,Cntn1,Rdx,Cct3,Wdr1,Ndrg1,Ndufs3,Napa,Rala,Syn2,Pgam1,Nme2,Sdha,Vdac2,Tkt,Dpysl2,Nefm,Nefl,Cct5,Aco2,Atp5o,Sod1,Ehd3,Ehd1,Stip1,Prdx3,Gsn,Snap25,Napb,Car13,Vcp,Uchl1,Fscn1,Ldhb,Stx4a,Anxa2,Atp1a1,Actr1a,Ina,Eef1a1,Pacsin1,Serinc5,Gpi1,Erbb2,Cdc42,Arf6,Dlst,Ezr,Gfap,Phgdh,Actg1,Sirt2,Tuba1b,Hspa2,Eno1,Glul,Cntn2,Itgb1,Stxbp1,Nefh,Tuba1a,Actb,Ass1,Rtn4,Calm1,Pdcd6ip,Bcl2,Thy1,Msn,Nme1,Ndufv2,…	1.73e-08	4.66e-07	Myelin sheath	34.9057
Process	GO:0030155	178	705	10090	10090.ENSMUSP00000000193,10090.ENSMUSP00000000299,10090.ENSMUSP00000000542,10090.ENSMUSP00000000579,10090.ENSMUSP00000000590,10090.ENSMUSP00000001319,10090.ENSMUSP00000001548,10090.ENSMUSP00000001592,10090.ENSMUSP00000001780,10090.ENSMUSP00000002284,10090.ENSMUSP00000002487,10090.ENSMUSP00000002708,10090.ENSMUSP00000003451,10090.ENSMUSP00000004326,10090.ENSMUSP00000004646,10090.ENSMUSP00000004990…	Ccl2,Itgb2,Acvrl1,Sox9,Rdx,Efnb2,Itga3,Jup,Akt1,Plaur,Braf,Shh,Rnd1,Plxna3,Coro1c,Mapk14,Map2k1,Zp3,Cd44,Nid1,Arpc2,Rhoa,Bmp7,Adam19,Csf1,Cd83,Lama5,C1qtnf1,Nuak1,Ap3d1,Arg2,Vcl,Rgcc,Angpt1,Bcl6,Tfrc,Tnfrsf21,Cyp1b1,Rela,P4hb,Podxl,Smad7,Ppm1f,Rsu1,Gsn,Itga6,Hsd17b12,Jag1,Zc3h8,Serpini1,Lef1,Cd1d1,Bcl10,Cyr61,Nr4a3,Epb4.1l4b,Ift74,Pdpn,Tesc,Dtx1,Ret,Lag3,Cd9,Rps3,Il4ra,Stx4a,Ilk,Sash3,Tnfsf13b,Cx…	1.89e-08	1.22e-06	Regulation of cell adhesion	25.2482
Process	GO:0032535	116	402	10090	10090.ENSMUSP00000000127,10090.ENSMUSP00000000590,10090.ENSMUSP00000000641,10090.ENSMUSP00000000939,10090.ENSMUSP00000001347,10090.ENSMUSP00000001780,10090.ENSMUSP00000004326,10090.ENSMUSP00000004920,10090.ENSMUSP00000005234,10090.ENSMUSP00000006467,10090.ENSMUSP00000007959,10090.ENSMUSP00000008893,10090.ENSMUSP00000010298,10090.ENSMUSP00000015137,10090.ENSMUSP00000015486,10090.ENSMUSP00000016143…	Wnt3,Rdx,Sema4f,Hip1r,Rnd2,Akt1,Plxna3,Ulk2,Wdr1,Arpc2,Rhoa,Coro1b,Spire2,Limk1,Xk,Wasf3,Slc12a7,Pfn1,Trpv2,Ndel1,Pfn4,Slc9a3r1,Grb2,F2rl1,Dpysl2,Nefm,Nefl,Twf1,Arhgap28,Slit1,Cln8,Gsn,Gba2,Sema3c,Sema3a,Cdk5,Draxin,Sema3d,Rufy3,Wasl,Mtpn,Add2,Ret,Fchsd2,Pak1,Ilk,Fgf13,Ist1,Vav3,Plekhh2,Atp13a2,Fhod3,Sema7a,Lrp1,Ttl,Wipf2,Map3k13,Trpc5,Sh3bp1,Eps8,Arf6,Dscam,Cdc42ep2,Vav2,Ezr,Ptprs,Ep300,Sema5a,J…	1.99e-08	1.28e-06	Regulation of cellular component size	28.8557
TISSUES	BTO:0000562	231	980	10090	10090.ENSMUSP00000000090,10090.ENSMUSP00000000193,10090.ENSMUSP00000000260,10090.ENSMUSP00000000466,10090.ENSMUSP00000000542,10090.ENSMUSP00000000767,10090.ENSMUSP00000001242,10090.ENSMUSP00000001319,10090.ENSMUSP00000001780,10090.ENSMUSP00000001963,10090.ENSMUSP00000002572,10090.ENSMUSP00000003720,10090.ENSMUSP00000003964,10090.ENSMUSP00000004208,10090.ENSMUSP00000004381,10090.ENSMUSP00000005826…	Cox5a,Ccl2,Gmpr,Plin2,Acvrl1,Rpa1,D10Jhu81e,Efnb2,Akt1,Ace,Slc9a3r2,Crot,Gys1,Angptl2,Lpcat3,Cs,Ubqln4,Dynll1,Dnajc19,Endog,Bnip1,Lama5,Ndufa1,Serinc3,Mmp9,Gipc1,Ctgf,Nudt4,Herc4,Dynll2,Map2k6,Coro6,Stx8,Gosr2,Hif1a,Ryr2,Cap2,Ogn,Agtpbp1,Sdha,Dhfr,Pdhb,Vcl,Rgcc,Samm50,Aco2,Ets2,Atp5o,Nudt3,Ankrd1,Cpt1a,Limd1,Acadl,Parp1,Fh1,Vim,Mrrf,Grb14,Agpat2,Entpd2,Slc23a2,Spred1,Ptpn1,Gucy1b3,Eif4e,Metap1,Dd…	2.16e-08	2.12e-06	Heart	23.5714
KEGG	mmu04360	65	176	10090	10090.ENSMUSP00000000001,10090.ENSMUSP00000000641,10090.ENSMUSP00000001319,10090.ENSMUSP00000002708,10090.ENSMUSP00000003451,10090.ENSMUSP00000004326,10090.ENSMUSP00000007959,10090.ENSMUSP00000009143,10090.ENSMUSP00000015137,10090.ENSMUSP00000020204,10090.ENSMUSP00000022629,10090.ENSMUSP00000023467,10090.ENSMUSP00000023600,10090.ENSMUSP00000025993,10090.ENSMUSP00000026994,10090.ENSMUSP00000029445…	Gnai3,Sema4f,Efnb2,Shh,Rnd1,Plxna3,Rhoa,Bmp7,Limk1,Ntn4,Dpysl2,Pak2,Robo1,Slit1,Unc5a,Nras,Efna3,Sema3c,Sema3a,Cdk5,Sema3d,Pak1,Ilk,Rras,Sema7a,Trpc5,Mapk3,Plxnb2,Pard6b,Ppp3ca,Cdc42,Pik3r1,Gnai2,Lrrc4,Neo1,Epha3,Epha6,Slit3,Sema5a,Sema3e,Gnai1,Efna5,Rac1,Dpysl5,Myl9,Itgb1,Rgma,Plxnc1,Pak6,Plcg1,L1cam,Ephb2,Unc5c,Camk2b,Ephb6,Dcc,Plxna4,Met,Nck1,Cfl1,Ssh1,Slit2,Sema6b,Lrrc4c,Plxna1	2.29e-08	3.8e-06	Axon guidance	36.9318
Component	GO:0098589	118	413	10090	10090.ENSMUSP00000000001,10090.ENSMUSP00000000058,10090.ENSMUSP00000000109,10090.ENSMUSP00000000122,10090.ENSMUSP00000000299,10090.ENSMUSP00000001566,10090.ENSMUSP00000002708,10090.ENSMUSP00000003717,10090.ENSMUSP00000004646,10090.ENSMUSP00000007130,10090.ENSMUSP00000007757,10090.ENSMUSP00000008878,10090.ENSMUSP00000020107,10090.ENSMUSP00000020329,10090.ENSMUSP00000020706,10090.ENSMUSP00000021077…	Gnai3,Cav2,Cntn1,Ngfr,Itgb2,Tubb5,Shh,Abcb4,Coro1c,Ctnnb1,Tgfbr1,Gprc5b,Atp2b1,Egfr,Adcy1,Slc9a3r1,Slc6a4,Adcy2,Vdac2,Vcl,Angpt1,Adcy8,Cxadr,Faim2,Rhoq,Gabbr1,Fas,Podxl,Unc5a,Cd55,Stom,Snap25,Spred1,Mall,Lamtor2,Bcl10,Sdcbp,Abca1,Stoml2,Pdpn,Tnfrsf1b,Slc2a1,Ppt1,Slc9a1,Stx12,Abcg2,Add2,Ret,Olr1,Lrp6,Ldhb,Slc2a3,Tnfrsf1a,Ldlr,Anxa2,Stoml1,Atp1b3,S100a10,Bicd2,Atp1a1,Prkar2b,Fam198a,Cbl,Efhd2,Prkcd…	2.37e-08	6e-07	Membrane region	28.5714
Process	GO:0034762	150	568	10090	10090.ENSMUSP00000000193,10090.ENSMUSP00000000201,10090.ENSMUSP00000000642,10090.ENSMUSP00000001115,10090.ENSMUSP00000001780,10090.ENSMUSP00000001963,10090.ENSMUSP00000002487,10090.ENSMUSP00000002572,10090.ENSMUSP00000003442,10090.ENSMUSP00000004137,10090.ENSMUSP00000004327,10090.ENSMUSP00000004990,10090.ENSMUSP00000005234,10090.ENSMUSP00000007207,10090.ENSMUSP00000007257,10090.ENSMUSP00000009875…	Ccl2,Nalcn,Hk2,Grk6,Akt1,Ace,Braf,Slc9a3r2,Cacnb3,Gstm7,G6pdx,Mapk14,Wdr1,Clcn2,Clic1,Kcnd1,Pea15a,Nol3,Mmp9,Kcnab3,Cacng2,Tspan13,Slc9a3r1,Ryr2,Cacna2d3,Klhl24,Pim1,Ehd3,Rhoq,Cnih2,Gal,Kcnk4,Jph3,Iscu,Stom,Fabp5,Nr4a3,Pink1,Adc,Slc9a1,Cdk5,Tesc,Rtn2,Cx3cl1,Tmem38a,Stoml1,Rasgrf1,Atp1b3,Stac,Crebl2,Fam115a,Sln,Kcnj2,Irs2,Clic4,Arl6ip5,Kcna2,Trib3,Oxsr1,Thbs1,Akap9,Acsl5,Kcnh5,Kcnh2,Zmpste24,Kcna1…	2.44e-08	1.55e-06	Regulation of transmembrane transport	26.4085
Keyword	KW-0966	231	982	10090	10090.ENSMUSP00000000122,10090.ENSMUSP00000000572,10090.ENSMUSP00000000590,10090.ENSMUSP00000000641,10090.ENSMUSP00000001548,10090.ENSMUSP00000001562,10090.ENSMUSP00000002840,10090.ENSMUSP00000003572,10090.ENSMUSP00000004646,10090.ENSMUSP00000004673,10090.ENSMUSP00000005218,10090.ENSMUSP00000005234,10090.ENSMUSP00000006467,10090.ENSMUSP00000007130,10090.ENSMUSP00000007959,10090.ENSMUSP00000009875…	Ngfr,Gabra2,Rdx,Sema4f,Itga3,Tulp3,Pex6,Gars,Coro1c,Ndrg2,Cd44,Wdr1,Arpc2,Ctnnb1,Rhoa,Kcnd1,Limk1,Wwc1,Nsg2,Gnb2l1,Rab10,Slc9a3r1,Nme2,Cyp46a1,Plk2,Spry2,Lrrc6,Adcy8,Cby1,Lynx1,Alcam,Klhl24,Robo1,Rttn,Ehd3,Gabbr1,Dpysl3,Ehd1,Ighmbp2,Cnih2,Farp1,Podxl,Mkln1,Cct8,Unc5a,Gria4,Arl8a,Efcab2,Ccdc181,Kif5c,Kif3b,Stmn2,Glrb,B4galt1,Tln1,Ift74,Pdpn,Adc,Ncdn,Cdk5,Nsg1,Rufy3,Tesc,Ift81,Fscn1,Slc2a3,Fchsd2,P…	2.49e-08	9.69e-07	Cell projection	23.5234
Process	GO:0090087	171	674	10090	10090.ENSMUSP00000000193,10090.ENSMUSP00000000543,10090.ENSMUSP00000001319,10090.ENSMUSP00000001507,10090.ENSMUSP00000001592,10090.ENSMUSP00000002029,10090.ENSMUSP00000002320,10090.ENSMUSP00000002708,10090.ENSMUSP00000003442,10090.ENSMUSP00000004990,10090.ENSMUSP00000005255,10090.ENSMUSP00000006467,10090.ENSMUSP00000009157,10090.ENSMUSP00000014920,10090.ENSMUSP00000017799,10090.ENSMUSP00000018880…	Ccl2,Grasp,Efnb2,Cyp51,Jup,Emd,Ppard,Shh,Cacnb3,Mapk14,Wisp1,Arpc2,Dynll1,Nol3,Cd40,Ndel1,Snx3,Mcu,Egfr,Pfkl,Gnb2l1,Srebf1,Rsad2,Dnajc27,Ppm1a,Hif1a,Chga,Hmgcr,F2rl1,Glud1,Rgcc,Angpt1,Adcy8,Mief1,Abcg1,Syt4,Gabbr1,Pmaip1,Ankrd1,Cpt1a,Casp1,Ecrg4,Ppm1f,Rab29,Uhmk1,Acvr1c,Stom,Ptpn1,Anxa5,Slc7a11,Ppid,Serp1,Txn1,Pink1,Cdk5,Tomm7,Cd38,Rufy3,Aacs,Camk1,Tnfrsf1a,Ipo5,Pak1,Stx4a,Nucb1,Cckbr,Acsl4,Sfrp1…	2.73e-08	1.73e-06	Regulation of peptide transport	25.3709
COMPARTMENTS	GOCC:0031226	197	808	10090	10090.ENSMUSP00000000058,10090.ENSMUSP00000000109,10090.ENSMUSP00000000299,10090.ENSMUSP00000000542,10090.ENSMUSP00000000572,10090.ENSMUSP00000001319,10090.ENSMUSP00000001548,10090.ENSMUSP00000001780,10090.ENSMUSP00000001824,10090.ENSMUSP00000002284,10090.ENSMUSP00000002848,10090.ENSMUSP00000003061,10090.ENSMUSP00000003550,10090.ENSMUSP00000005509,10090.ENSMUSP00000007757,10090.ENSMUSP00000009875…	Cav2,Cntn1,Itgb2,Acvrl1,Gabra2,Efnb2,Itga3,Akt1,Folh1,Plaur,Grin2d,Bcam,Ncstn,Stx1a,Tgfbr1,Kcnd1,Cd40,Cacng2,Atp2b1,Il20ra,Mcu,Lgr5,Adcy1,Slc6a4,F2rl1,Cdhr1,Micu2,Ank,Adcy8,Alcam,Pvrl3,P2rx6,Tfrc,Ifnar1,Asic1,Tnfrsf21,Xdh,Gabbr1,Cnih2,Slc1a1,Itgb8,Gria4,Acvr1c,Stom,Itga6,Snap25,Ccdc109b,Glrb,Mmp16,Sdcbp,Abca1,Slc2a1,Slc9a1,Grik3,Gabrd,Slc6a6,Ret,Slc2a3,Prmt8,Abcc8,Il13ra1,Slc6a8,Gpm6a,Pvrl1,Atp1b…	3.08e-08	1.24e-06	Intrinsic component of plasma membrane	24.3812
Component	GO:0000139	151	576	10090	10090.ENSMUSP00000000001,10090.ENSMUSP00000000058,10090.ENSMUSP00000003717,10090.ENSMUSP00000009219,10090.ENSMUSP00000015011,10090.ENSMUSP00000016323,10090.ENSMUSP00000017851,10090.ENSMUSP00000018711,10090.ENSMUSP00000019143,10090.ENSMUSP00000020329,10090.ENSMUSP00000020350,10090.ENSMUSP00000020420,10090.ENSMUSP00000020537,10090.ENSMUSP00000020846,10090.ENSMUSP00000021329,10090.ENSMUSP00000021940…	Gnai3,Cav2,Abcb4,Cabp7,Surf4,Camk1g,Serinc3,Gabarap,Slc35b4,Egfr,Lgr5,Ap3d1,Nsg2,Srebf1,Gosr2,Lman2,Scamp1,Pkmyt1,Abcg1,Vapa,Osbp,Map4k2,St8sia2,Abcb6,Stx6,Ext2,Mall,Nras,Sec22b,Slc35a1,Ugcg,B4galt1,Gba2,Glipr2,Leprot,Stx12,Rheb,Nsg1,Wasl,Golt1b,St8sia1,Tnfrsf1a,Qpctl,Xylt1,Rab6a,Nucb1,Tnks,St3gal2,Zdhhc7,Chst5,Galnt2,St3gal4,Rab6b,Tpst1,Scamp5,St6galnac5,Sppl2b,Clstn1,BC022687,Dhcr24,Copg2,Manea…	3.23e-08	8.06e-07	Golgi membrane	26.2153
Keyword	KW-0653	153	586	10090	10090.ENSMUSP00000001079,10090.ENSMUSP00000001479,10090.ENSMUSP00000002063,10090.ENSMUSP00000002790,10090.ENSMUSP00000003038,10090.ENSMUSP00000003117,10090.ENSMUSP00000003971,10090.ENSMUSP00000004508,10090.ENSMUSP00000005798,10090.ENSMUSP00000006181,10090.ENSMUSP00000009234,10090.ENSMUSP00000010298,10090.ENSMUSP00000011029,10090.ENSMUSP00000014694,10090.ENSMUSP00000015725,10090.ENSMUSP00000018711…	Sec24b,Kpnb1,Ap4e1,Cse1l,Ap2a2,Ap1m1,Lin7b,Tmed4,Snx6,Napa,Ap1b1,Spire2,Dnajc19,Zfyve20,Bnip1,Gabarap,Snx3,Pex7,Ap3d1,Rufy1,Rab10,Rab37,Gosr2,Rab15,Lman2,Scamp1,Kpna3,Dnajc15,Atg3,Ehd3,Tap2,Seh1l,Slc15a3,Ehd1,Apba1,Arl8a,Rab29,Stx6,Ahctf1,Nup35,Napb,Snx16,Sec62,Ppid,Serp1,Sec22b,Snx7,Snx30,Stx12,Tomm7,Tesc,Sdad1,Vps33a,Rab35,Snx8,Sec61a1,Golt1b,Ccdc91,Necap1,Ipo5,Fchsd2,Rab6a,Praf2,Timm17b,Tnks,M…	3.26e-08	1.18e-06	Protein transport	26.1092
Process	GO:0042391	123	440	10090	10090.ENSMUSP00000000122,10090.ENSMUSP00000000201,10090.ENSMUSP00000000572,10090.ENSMUSP00000001592,10090.ENSMUSP00000001780,10090.ENSMUSP00000002100,10090.ENSMUSP00000002848,10090.ENSMUSP00000003442,10090.ENSMUSP00000005234,10090.ENSMUSP00000005509,10090.ENSMUSP00000007257,10090.ENSMUSP00000019290,10090.ENSMUSP00000020000,10090.ENSMUSP00000020640,10090.ENSMUSP00000021410,10090.ENSMUSP00000021750…	Ngfr,Nalcn,Gabra2,Jup,Akt1,Tmem25,Grin2d,Cacnb3,Wdr1,Stx1a,Clic1,Cacng2,Hebp2,Gnb2l1,Ppp2r3c,Ryr2,P2rx6,Cxadr,Sod1,Asic1,Slc4a8,Ehd3,Gabbr1,Pmaip1,Cnih2,Kcnk4,Prdx3,Smad7,Casp1,Gria4,Parp1,Glrb,Gclm,Vcp,Stoml2,Pink1,Slc9a1,Grik3,Cdk5,Gabrd,Gabrg1,Ndufc2,Fgf13,Cbln1,Cx3cl1,Gclc,Atp1b3,Tspo,Kcnj2,Grm1,Kcnk9,Atp1a1,Piezo2,Rnf122,Arl6ip5,Kcna2,Kctd7,Rims4,Kcnk1,Akap9,Kcnh5,Kcnh2,Grin3b,Trpc5,Oprd1,Pi…	3.36e-08	2.12e-06	Regulation of membrane potential	27.9545
Component	GO:0099055	62	166	10090	10090.ENSMUSP00000000572,10090.ENSMUSP00000001319,10090.ENSMUSP00000002848,10090.ENSMUSP00000019290,10090.ENSMUSP00000020706,10090.ENSMUSP00000021195,10090.ENSMUSP00000023334,10090.ENSMUSP00000023441,10090.ENSMUSP00000025338,10090.ENSMUSP00000025805,10090.ENSMUSP00000027020,10090.ENSMUSP00000030925,10090.ENSMUSP00000032185,10090.ENSMUSP00000033752,10090.ENSMUSP00000036962,10090.ENSMUSP00000037255…	Gabra2,Efnb2,Grin2d,Cacng2,Adcy1,Slc6a4,Pvrl3,P2rx6,Gabbr1,Cnih2,Gria4,Gabrd,Slc6a6,Slc6a8,Clstn1,Grm1,Htr5a,Ptprf,Pcdh8,Dagla,Htr2a,Grin3b,Oprd1,D3Bwg0562e,Lrrc4b,Flrt3,Adra1a,Kcna1,Adra2c,Lrrc4,Grin2b,Gabrg2,Ptprs,Nlgn3,Shisa6,Drd2,Gria3,Ptpro,Kcnd2,Scn8a,Cacng3,Itgb1,Slitrk3,Cacng7,Slitrk1,Rtn4,Ephb2,Gabbr2,Kcnc3,Lrfn1,Grik4,Dcc,Grin2a,Erbb4,Lrrtm1,Abhd6,Slitrk2,Ncam1,Chrm2,Lrrc4c,Cacng8,Chrm3	3.44e-08	8.44e-07	Integral component of postsynaptic membrane	37.3494
Process	GO:0035295	226	961	10090	10090.ENSMUSP00000000095,10090.ENSMUSP00000000193,10090.ENSMUSP00000000542,10090.ENSMUSP00000000579,10090.ENSMUSP00000001319,10090.ENSMUSP00000001548,10090.ENSMUSP00000001562,10090.ENSMUSP00000001780,10090.ENSMUSP00000001963,10090.ENSMUSP00000002708,10090.ENSMUSP00000004208,10090.ENSMUSP00000004968,10090.ENSMUSP00000004990,10090.ENSMUSP00000005066,10090.ENSMUSP00000005218,10090.ENSMUSP00000005279…	Tbx2,Ccl2,Acvrl1,Sox9,Efnb2,Itga3,Tulp3,Akt1,Ace,Shh,Angptl2,Plod3,Mapk14,Map2k1,Cd44,Klf5,Ctnnb1,Tgfbr1,Rhoa,Elk3,Rala,Bmp7,Csf1,Lama5,Ctsz,Myh9,Etv4,Pfn1,Sfrp5,D17Wsu104e,Ctgf,Ascl1,Egfr,Lgr5,Srebf1,Sdc1,Gna13,Hif1a,Arg2,Ryr2,Fgf9,Loxl2,Rb1,Spry2,Ywhaz,Angpt1,Cby1,Vdr,Robo1,Nus1,Cyp1b1,Bag6,Smad4,Slc1a1,Itgb8,Mmp19,Podxl,Smad7,Rdh10,Cat,Jag1,Spred1,Slc7a11,Smad9,Lef1,Apoa1bp,Eif4e,Bcl10,Cyr61,C…	3.62e-08	2.27e-06	Tube development	23.5172
Process	GO:0010942	177	708	10090	10090.ENSMUSP00000000122,10090.ENSMUSP00000000305,10090.ENSMUSP00000000939,10090.ENSMUSP00000001319,10090.ENSMUSP00000001780,10090.ENSMUSP00000001824,10090.ENSMUSP00000001963,10090.ENSMUSP00000002284,10090.ENSMUSP00000002808,10090.ENSMUSP00000003320,10090.ENSMUSP00000005218,10090.ENSMUSP00000007130,10090.ENSMUSP00000007757,10090.ENSMUSP00000007959,10090.ENSMUSP00000009143,10090.ENSMUSP00000009550…	Ngfr,Tpd52l1,Hip1r,Efnb2,Akt1,Folh1,Ace,Plaur,Prkra,Eif2b5,Cd44,Ctnnb1,Tgfbr1,Rhoa,Bmp7,Elk1,Pea15a,Endog,Ctsz,Cd40,Serinc3,Mmp9,Hebp2,Dusp6,Ctgf,Il20ra,Timp3,Ascl1,Gnb2l1,Igfbp3,Map2k6,Slc9a3r1,Hif1a,Fos,Gadd45g,Hmgcr,Lats2,Rgcc,Clu,Trim35,Acin1,Vdr,Bcl6,Pak2,Robo1,Sod1,Rps6ka2,Xdh,Eif2ak2,Cyp1b1,Smad4,Pmaip1,Fas,Ankrd1,Gal,Maged1,Casp1,Stk17b,Ppm1f,Itm2c,Parp1,Atf6,Acvr1c,Gsn,Frzb,Itga6,Zc3h8,C…	3.7e-08	2.32e-06	Positive regulation of cell death	25
Process	GO:0055114	217	917	10090	10090.ENSMUSP00000000090,10090.ENSMUSP00000000260,10090.ENSMUSP00000001507,10090.ENSMUSP00000001780,10090.ENSMUSP00000002064,10090.ENSMUSP00000002305,10090.ENSMUSP00000002320,10090.ENSMUSP00000003720,10090.ENSMUSP00000003964,10090.ENSMUSP00000004137,10090.ENSMUSP00000004327,10090.ENSMUSP00000004968,10090.ENSMUSP00000004990,10090.ENSMUSP00000005003,10090.ENSMUSP00000005647,10090.ENSMUSP00000005651…	Cox5a,Gmpr,Cyp51,Akt1,Blvra,Kdm7a,Ppard,Crot,Gys1,Gstm7,G6pdx,Plod3,Mapk14,Lbr,Ndufs3,Por,Cs,P4htm,Tph2,Acat2,Rdh13,Fads1,Gfod2,Qdpr,Ndufa1,Foxred2,Kcnab3,Pnpo,Cyb561,Echdc1,Pex7,Pah,Pfkl,Txndc17,Nxn,Aloxe3,L2hgdh,Tmx1,Cyp46a1,Sdha,Hmgcr,Dhfr,Pdhb,Glud1,Ero1l,Tkt,Loxl2,Sqle,Ndufb9,Slc25a17,Ndufa6,Aco2,Ppp1r1a,Pdia5,Sod1,Pla2g7,Xdh,Cyp1b1,Eci1,Me2,Fads2,Aldh1a7,Tm7sf2,Cpt1a,Cyp26a1,Prdx3,P4hb,Scd3…	4.53e-08	2.82e-06	Oxidation-reduction process	23.6641
Component	GO:0098685	48	113	10090	10090.ENSMUSP00000000543,10090.ENSMUSP00000001319,10090.ENSMUSP00000007130,10090.ENSMUSP00000009538,10090.ENSMUSP00000018437,10090.ENSMUSP00000018644,10090.ENSMUSP00000019290,10090.ENSMUSP00000019577,10090.ENSMUSP00000020706,10090.ENSMUSP00000022639,10090.ENSMUSP00000023007,10090.ENSMUSP00000025338,10090.ENSMUSP00000025830,10090.ENSMUSP00000030814,10090.ENSMUSP00000033941,10090.ENSMUSP00000035208…	Grasp,Efnb2,Ctnnb1,Syn2,Pfn1,Adora2b,Cacng2,Gipc1,Adcy1,Nefl,Adcy8,Gabbr1,Apba1,Cdk5,Plat,Bsn,Pde4a,Grm1,Cplx1,Ina,Pcdh8,Ppp3ca,Cdc42,Lrrc4,Ptprs,Actg1,Myo5b,Cdh11,Tubb2b,Ptpra,Cacng3,Itgb1,Nefh,Abr,Snap91,Actb,Plcg1,L1cam,Shank1,Tnr,Dcc,Stat3,Stxbp5,Bcr,Ncam1,Lrrc4c,Cacng8,Iqsec1	5.63e-08	1.33e-06	Schaffer collateral - CA1 synapse	42.4779
COMPARTMENTS	GOCC:0045211	82	255	10090	10090.ENSMUSP00000000109,10090.ENSMUSP00000000572,10090.ENSMUSP00000001319,10090.ENSMUSP00000002848,10090.ENSMUSP00000005077,10090.ENSMUSP00000007130,10090.ENSMUSP00000019290,10090.ENSMUSP00000020706,10090.ENSMUSP00000021195,10090.ENSMUSP00000023334,10090.ENSMUSP00000023441,10090.ENSMUSP00000024099,10090.ENSMUSP00000025338,10090.ENSMUSP00000025805,10090.ENSMUSP00000026635,10090.ENSMUSP00000027020…	Cntn1,Gabra2,Efnb2,Grin2d,Hspb1,Ctnnb1,Cacng2,Adcy1,Slc6a4,Pvrl3,P2rx6,Ache,Gabbr1,Cnih2,Farp1,Gria4,Gabrd,Nsg1,Gabrg1,Slc6a6,Slc6a8,Cbln1,Clstn1,Grm1,Htr5a,Ptprf,Pacsin1,Pcdh8,Akap9,Dagla,Htr2a,Grin3b,Oprd1,D3Bwg0562e,Lrrc4b,Flrt3,Adra1a,Erbb2,Kcna1,Abhd17b,Kcnb1,Adra2c,Lrrc4,Grin2b,Gabrg2,Adam10,Ptprs,Dnm3,Nlgn3,Rgs7bp,Shisa6,Nptx2,Drd2,Gria3,Ptpro,Kcnd2,Scn8a,Cacng3,Cntn2,Itgb1,Slitrk3,Cacng7,…	5.87e-08	2.31e-06	Postsynaptic membrane	32.1569
COMPARTMENTS	GOCC:0099055	61	165	10090	10090.ENSMUSP00000000572,10090.ENSMUSP00000001319,10090.ENSMUSP00000002848,10090.ENSMUSP00000019290,10090.ENSMUSP00000020706,10090.ENSMUSP00000021195,10090.ENSMUSP00000023334,10090.ENSMUSP00000023441,10090.ENSMUSP00000025338,10090.ENSMUSP00000025805,10090.ENSMUSP00000027020,10090.ENSMUSP00000030925,10090.ENSMUSP00000032185,10090.ENSMUSP00000033752,10090.ENSMUSP00000036962,10090.ENSMUSP00000037255…	Gabra2,Efnb2,Grin2d,Cacng2,Adcy1,Slc6a4,Pvrl3,P2rx6,Gabbr1,Cnih2,Gria4,Gabrd,Slc6a6,Slc6a8,Clstn1,Grm1,Htr5a,Ptprf,Pcdh8,Dagla,Htr2a,Grin3b,Oprd1,D3Bwg0562e,Lrrc4b,Flrt3,Adra1a,Kcna1,Adra2c,Lrrc4,Grin2b,Gabrg2,Ptprs,Nlgn3,Shisa6,Drd2,Gria3,Ptpro,Kcnd2,Scn8a,Cacng3,Itgb1,Slitrk3,Cacng7,Slitrk1,Rtn4,Ephb2,Gabbr2,Kcnc3,Lrfn1,Grik4,Dcc,Grin2a,Erbb4,Lrrtm1,Abhd6,Slitrk2,Ncam1,Lrrc4c,Cacng8,Chrm3	5.92e-08	2.31e-06	Integral component of postsynaptic membrane	36.9697
Process	GO:0009725	196	812	10090	10090.ENSMUSP00000000058,10090.ENSMUSP00000000186,10090.ENSMUSP00000000193,10090.ENSMUSP00000000590,10090.ENSMUSP00000001548,10090.ENSMUSP00000001780,10090.ENSMUSP00000002320,10090.ENSMUSP00000002466,10090.ENSMUSP00000002487,10090.ENSMUSP00000003320,10090.ENSMUSP00000004968,10090.ENSMUSP00000005066,10090.ENSMUSP00000005651,10090.ENSMUSP00000006235,10090.ENSMUSP00000006764,10090.ENSMUSP00000006949…	Cav2,Fgf23,Ccl2,Rdx,Itga3,Akt1,Ppard,Nr2f6,Braf,Eif2b5,Plod3,Map2k1,Por,Ctsb,Aprt,Tph2,Ctnnb1,Tgfbr1,Rhoa,Bmp7,Timp1,Fads1,Cacybp,Qdpr,Rxrg,Timp2,Adora2b,Ndel1,Atp2b1,Ctgf,Timp3,Eif4ebp2,Avpr1a,Egfr,Lgr5,Btg2,Srebf1,Sdc1,Rab10,Ddx5,Grb2,Nme2,Serpina3n,Fos,Lats2,Nefl,Adcy8,Vdr,Dhh,Calcoco1,Rhoq,Fas,Gal,Rela,Mmp19,Parp1,Esrrg,Acvr1c,Grb14,Cat,Crls1,Ptpn1,Eif6,Anxa5,Lef1,Gclm,Eif4e,Nr4a3,Ugcg,Prkaa2…	6.22e-08	3.82e-06	Response to hormone	24.1379
KEGG	mmu05205	69	199	10090	10090.ENSMUSP00000000058,10090.ENSMUSP00000000127,10090.ENSMUSP00000000590,10090.ENSMUSP00000001780,10090.ENSMUSP00000002284,10090.ENSMUSP00000002487,10090.ENSMUSP00000002708,10090.ENSMUSP00000004990,10090.ENSMUSP00000005066,10090.ENSMUSP00000005218,10090.ENSMUSP00000007130,10090.ENSMUSP00000007959,10090.ENSMUSP00000009550,10090.ENSMUSP00000017881,10090.ENSMUSP00000020234,10090.ENSMUSP00000020329…	Cav2,Wnt3,Rdx,Akt1,Plaur,Braf,Shh,Mapk14,Map2k1,Cd44,Ctnnb1,Rhoa,Elk1,Mmp9,Timp3,Egfr,Sdc1,Ddx5,Grb2,Hif1a,Fas,Rps6kb2,Wnt2b,Nras,Slc9a1,Pak1,Mras,Vav3,Ppp1ca,Fzd8,Lum,Cbl,Rras,Thbs1,Gpc1,Mapk3,Fzd9,Itga2,Erbb2,Cdc42,Pik3r1,Fzd1,Vav2,Ezr,Sos1,Ppp1r12a,Rras2,Prkcb,Actg1,Rac1,Mapk11,Itgb1,Ank3,Casp3,Prkcg,Actb,Cttn,Plcg1,Rps6,Dcn,Camk2b,Akt3,Fzd7,Met,Msn,Ank1,Erbb4,Stat3,Ppp1r12b	6.4e-08	7.08e-06	Proteoglycans in cancer	34.6734
Function	GO:0032549	103	352	10090	10090.ENSMUSP00000000001,10090.ENSMUSP00000001347,10090.ENSMUSP00000001513,10090.ENSMUSP00000001566,10090.ENSMUSP00000002303,10090.ENSMUSP00000003451,10090.ENSMUSP00000007959,10090.ENSMUSP00000009003,10090.ENSMUSP00000020741,10090.ENSMUSP00000020930,10090.ENSMUSP00000020986,10090.ENSMUSP00000021001,10090.ENSMUSP00000021076,10090.ENSMUSP00000021217,10090.ENSMUSP00000021407,10090.ENSMUSP00000021459…	Gnai3,Rnd2,Tubb6,Tubb5,Rhoc,Rnd1,Rhoa,Rala,Drg1,Gna13,Dnajc27,Rab10,Rab37,Nme2,Srp54a,Rab15,Glud1,Rhobtb2,Mief1,Ehd3,Rhoq,Gnal,Gna14,Ehd1,Arl8a,Rab29,Ehd4,Nras,Gucy1b3,Rit1,Npr2,Gnl2,Rheb,Rab35,Rasl11a,Tuba8,Fkbp4,Rab30,Rab6a,Srpr,Mras,Rab6b,Srprb,Irgq,Pck2,Rragb,Tsr1,Rhov,Rras,Eef1a1,Mfhas1,Rasl10a,Tuba1c,Rasl11b,Cdc42,Diras2,Arf6,Hist1h1e,Gnai2,Rabl6,Gimap6,Rhoj,Samhd1,Tubb2a,Rab39,Dnm3,Rab7b,R…	6.91e-08	8.58e-06	Ribonucleoside binding	29.2614
Keyword	KW-0967	141	535	10090	10090.ENSMUSP00000002100,10090.ENSMUSP00000004173,10090.ENSMUSP00000004646,10090.ENSMUSP00000005798,10090.ENSMUSP00000005952,10090.ENSMUSP00000014694,10090.ENSMUSP00000017783,10090.ENSMUSP00000019939,10090.ENSMUSP00000019962,10090.ENSMUSP00000020112,10090.ENSMUSP00000020329,10090.ENSMUSP00000020537,10090.ENSMUSP00000020643,10090.ENSMUSP00000021001,10090.ENSMUSP00000021090,10090.ENSMUSP00000021195…	Tmem25,Cdip1,Coro1c,Snx6,Slc30a4,Zfyve20,Rab11fip4,Snx3,Cd164,Uhrf1bp1l,Egfr,Nsg2,Rufy1,Rab10,Grb2,Slc6a4,Scamp1,Dscr3,Ifnar1,Ehd3,Mic1,Ehd1,Slc1a1,Prdx3,Gfra1,Ifitm3,Tmem192,Ptp4a1,Abcb6,Arl8a,Grb14,Ehd4,Sppl2a,Stmn2,Snx16,Lrat,Lamtor2,Cd1d1,Abca1,Leprot,Rnf11,Ptp4a2,Stx12,Lrpap1,Nsg1,Ociad1,Vps33a,Rab35,Snx8,Avl9,Ret,Slc9a9,Praf2,Mvb12a,Vps26b,Ldlr,Stoml1,Snx1,Cmtm6,Clvs1,Scamp5,Sppl2b,Rep15,Sn…	7.06e-08	2.4e-06	Endosome	26.3551
Process	GO:0016477	202	845	10090	10090.ENSMUSP00000000193,10090.ENSMUSP00000000299,10090.ENSMUSP00000000542,10090.ENSMUSP00000000641,10090.ENSMUSP00000001319,10090.ENSMUSP00000001548,10090.ENSMUSP00000001592,10090.ENSMUSP00000001780,10090.ENSMUSP00000002303,10090.ENSMUSP00000002320,10090.ENSMUSP00000002708,10090.ENSMUSP00000002976,10090.ENSMUSP00000004646,10090.ENSMUSP00000005218,10090.ENSMUSP00000005234,10090.ENSMUSP00000007130…	Ccl2,Itgb2,Acvrl1,Sema4f,Efnb2,Itga3,Jup,Akt1,Rhoc,Ppard,Shh,Il17ra,Coro1c,Cd44,Wdr1,Ctnnb1,Tgfbr1,Rhoa,Coro1b,Lama5,Lamb3,Myh9,Top2b,Ndel1,Wwc1,Gipc1,Ctgf,Pex7,Ntn4,Ascl1,Egfr,Sdc1,Ccl7,Coro6,Srp54a,Hif1a,Chga,Hexb,F2rl1,Loxl2,Cxadr,Robo1,Cyp1b1,Rhoq,Bambi,Zfand5,Slit1,Gfra1,Limd1,Itgb8,Sbds,Ric8,Podxl,Itga6,Mapre1,Fam83d,Lef1,Lamtor2,Cyr61,B4galt1,Pdpn,Lurap1,Sema3c,Sema3a,Cdk5,Sema3d,Fscn1,Avl…	7.15e-08	4.35e-06	Cell migration	23.9053
Process	GO:0009894	207	872	10090	10090.ENSMUSP00000000001,10090.ENSMUSP00000000579,10090.ENSMUSP00000000590,10090.ENSMUSP00000000642,10090.ENSMUSP00000001127,10090.ENSMUSP00000001507,10090.ENSMUSP00000001780,10090.ENSMUSP00000001809,10090.ENSMUSP00000002708,10090.ENSMUSP00000004920,10090.ENSMUSP00000005066,10090.ENSMUSP00000006912,10090.ENSMUSP00000008537,10090.ENSMUSP00000008748,10090.ENSMUSP00000009530,10090.ENSMUSP00000011896…	Gnai3,Sox9,Rdx,Hk2,Poldip2,Cyp51,Akt1,Pabpc1,Shh,Ulk2,Map2k1,Pip4k2a,Carhsp1,Ubqln4,Timp1,Pgam1,Pip4k2c,Endog,Mapkapk2,Cul4a,Timp2,Pip4k2b,Fxr2,Gipc1,Vip,Snx3,Timp3,Egfr,Gnb2l1,Btg2,Igfbp3,Srebf1,Nampt,Trib2,Sptlc2,Hif1a,Caml,Agtpbp1,Hmgcr,Plk2,Clu,Rb1,Rnf19a,Bag6,Mic1,Dcp2,Smad4,Cpt1a,Rela,Huwe1,Smad7,Casp1,Vim,Cst3,Ptpn1,Eif6,Fam83d,Sec22b,Sdcbp,Rad23b,Vcp,Prkaa2,Tnfrsf1b,Pink1,Adc,Prkag2,Dffa,…	7.66e-08	4.61e-06	Regulation of catabolic process	23.7385
Function	GO:0032550	102	349	10090	10090.ENSMUSP00000000001,10090.ENSMUSP00000001347,10090.ENSMUSP00000001513,10090.ENSMUSP00000001566,10090.ENSMUSP00000002303,10090.ENSMUSP00000003451,10090.ENSMUSP00000007959,10090.ENSMUSP00000009003,10090.ENSMUSP00000020741,10090.ENSMUSP00000020930,10090.ENSMUSP00000020986,10090.ENSMUSP00000021001,10090.ENSMUSP00000021076,10090.ENSMUSP00000021217,10090.ENSMUSP00000021407,10090.ENSMUSP00000021459…	Gnai3,Rnd2,Tubb6,Tubb5,Rhoc,Rnd1,Rhoa,Rala,Drg1,Gna13,Dnajc27,Rab10,Rab37,Nme2,Srp54a,Rab15,Glud1,Rhobtb2,Mief1,Ehd3,Rhoq,Gnal,Gna14,Ehd1,Arl8a,Rab29,Ehd4,Nras,Gucy1b3,Rit1,Npr2,Gnl2,Rheb,Rab35,Rasl11a,Tuba8,Fkbp4,Rab30,Rab6a,Srpr,Mras,Rab6b,Srprb,Irgq,Pck2,Rragb,Tsr1,Rhov,Rras,Eef1a1,Mfhas1,Rasl10a,Tuba1c,Rasl11b,Cdc42,Diras2,Arf6,Hist1h1e,Gnai2,Rabl6,Gimap6,Rhoj,Samhd1,Tubb2a,Rab39,Dnm3,Rab7b,R…	8.38e-08	1e-05	Purine ribonucleoside binding	29.2264
Process	GO:1903829	96	322	10090	10090.ENSMUSP00000000058,10090.ENSMUSP00000000122,10090.ENSMUSP00000000193,10090.ENSMUSP00000000590,10090.ENSMUSP00000001452,10090.ENSMUSP00000001548,10090.ENSMUSP00000001592,10090.ENSMUSP00000001780,10090.ENSMUSP00000002029,10090.ENSMUSP00000002708,10090.ENSMUSP00000003442,10090.ENSMUSP00000004990,10090.ENSMUSP00000006467,10090.ENSMUSP00000014447,10090.ENSMUSP00000019290,10090.ENSMUSP00000020329…	Cav2,Ngfr,Ccl2,Rdx,Cct3,Itga3,Jup,Akt1,Emd,Shh,Cacnb3,Mapk14,Arpc2,Glis2,Cacng2,Egfr,Gnb2l1,Ppm1a,Cct5,Mief1,Tfrc,Pmaip1,Cct8,Rab29,Parp1,Stom,Prkaa2,Cdk5,Tomm7,Rufy3,Cct6a,Camk1,Tnfrsf1a,Ipo5,Pak1,Stx4a,Ptpn9,Tmem30a,Stac,Fam115a,Zdhhc1,BC018507,Hnrnpk,Zdhhc2,Mgat3,Cd81,Lrp1,Camk4,Cnst,Erbb2,Cdc42,Arf6,Abhd17b,Pik3r1,Kcnb1,Sorl1,Slc35d3,Cemip,Ezr,Epha3,Ep300,Ywhae,Pgrmc1,Myo5b,Gnai1,Mff,Numa1,Ce…	9.28e-08	5.54e-06	Positive regulation of cellular protein localization	29.8137
Function	GO:0001882	104	360	10090	10090.ENSMUSP00000000001,10090.ENSMUSP00000001347,10090.ENSMUSP00000001513,10090.ENSMUSP00000001566,10090.ENSMUSP00000002303,10090.ENSMUSP00000003451,10090.ENSMUSP00000007959,10090.ENSMUSP00000009003,10090.ENSMUSP00000020741,10090.ENSMUSP00000020930,10090.ENSMUSP00000020986,10090.ENSMUSP00000021001,10090.ENSMUSP00000021076,10090.ENSMUSP00000021217,10090.ENSMUSP00000021407,10090.ENSMUSP00000021459…	Gnai3,Rnd2,Tubb6,Tubb5,Rhoc,Rnd1,Rhoa,Rala,Drg1,Gna13,Dnajc27,Rab10,Rab37,Nme2,Srp54a,Rab15,Glud1,Rhobtb2,Mief1,Ehd3,Rhoq,Gnal,Gna14,Ehd1,Arl8a,Rab29,Ehd4,Nras,Gucy1b3,Rit1,Npr2,Cda,Gnl2,Rheb,Rab35,Rasl11a,Tuba8,Fkbp4,Rab30,Rab6a,Srpr,Mras,Rab6b,Srprb,Irgq,Pck2,Rragb,Tsr1,Rhov,Rras,Eef1a1,Mfhas1,Rasl10a,Tuba1c,Rasl11b,Cdc42,Diras2,Arf6,Hist1h1e,Gnai2,Rabl6,Gimap6,Rhoj,Samhd1,Tubb2a,Rab39,Dnm3,Rab…	1.01e-07	1.17e-05	Nucleoside binding	28.8889
Process	GO:0060322	195	814	10090	10090.ENSMUSP00000000001,10090.ENSMUSP00000000109,10090.ENSMUSP00000000127,10090.ENSMUSP00000000579,10090.ENSMUSP00000001562,10090.ENSMUSP00000002305,10090.ENSMUSP00000002487,10090.ENSMUSP00000002708,10090.ENSMUSP00000003320,10090.ENSMUSP00000003550,10090.ENSMUSP00000004326,10090.ENSMUSP00000004964,10090.ENSMUSP00000005066,10090.ENSMUSP00000006181,10090.ENSMUSP00000006828,10090.ENSMUSP00000007130…	Gnai3,Cntn1,Wnt3,Sox9,Tulp3,Kdm7a,Braf,Shh,Eif2b5,Ncstn,Plxna3,Pou1f1,Map2k1,Napa,Aplp1,Ctnnb1,Rhoa,Bmp7,Top2b,Ndel1,Hdac2,Atp2b1,Ascl1,Avpr1a,Egfr,Btg2,Adcy1,Slc6a4,Hif1a,Agtpbp1,Glud1,Dpysl2,Nefl,Klhl1,Cln5,Bcl2l2,Sharpin,Robo1,Faim2,Syt4,Pfdn1,Bag6,Zfand5,Slit1,Hprt,Abcb6,Xrn2,Cst3,Snph,Slc7a11,Smad9,Wnt2b,Lef1,Ptbp2,Nr4a3,Ssbp3,Slc2a1,Ppt1,Tmem57,Stmn1,Sema3a,Cdk5,Draxin,Cdk2ap1,Npy,Mtpn,Lrp6…	1.06e-07	6.29e-06	Head development	23.9558
Function	GO:0005525	100	342	10090	10090.ENSMUSP00000000001,10090.ENSMUSP00000001347,10090.ENSMUSP00000001513,10090.ENSMUSP00000001566,10090.ENSMUSP00000002303,10090.ENSMUSP00000003451,10090.ENSMUSP00000007959,10090.ENSMUSP00000009003,10090.ENSMUSP00000020741,10090.ENSMUSP00000020930,10090.ENSMUSP00000020986,10090.ENSMUSP00000021001,10090.ENSMUSP00000021076,10090.ENSMUSP00000021407,10090.ENSMUSP00000021459,10090.ENSMUSP00000022322…	Gnai3,Rnd2,Tubb6,Tubb5,Rhoc,Rnd1,Rhoa,Rala,Drg1,Gna13,Dnajc27,Rab10,Rab37,Srp54a,Rab15,Glud1,Rhobtb2,Ehd3,Rhoq,Gnal,Gna14,Ehd1,Arl8a,Rab29,Ehd4,Nras,Gucy1b3,Rit1,Npr2,Gnl2,Rheb,Rab35,Rasl11a,Tuba8,Fkbp4,Rab30,Rab6a,Srpr,Mras,Rab6b,Srprb,Irgq,Pck2,Rragb,Tsr1,Rhov,Rras,Eef1a1,Mfhas1,Rasl10a,Tuba1c,Rasl11b,Cdc42,Diras2,Arf6,Hist1h1e,Gnai2,Rabl6,Gimap6,Rhoj,Samhd1,Tubb2a,Rab39,Dnm3,Rab7b,Rap1b,Rab31,…	1.1e-07	1.22e-05	GTP binding	29.2398
Process	GO:0043065	161	641	10090	10090.ENSMUSP00000000122,10090.ENSMUSP00000000305,10090.ENSMUSP00000000939,10090.ENSMUSP00000001780,10090.ENSMUSP00000001824,10090.ENSMUSP00000001963,10090.ENSMUSP00000002284,10090.ENSMUSP00000002808,10090.ENSMUSP00000003320,10090.ENSMUSP00000005218,10090.ENSMUSP00000007130,10090.ENSMUSP00000007757,10090.ENSMUSP00000007959,10090.ENSMUSP00000009143,10090.ENSMUSP00000013842,10090.ENSMUSP00000015481…	Ngfr,Tpd52l1,Hip1r,Akt1,Folh1,Ace,Plaur,Prkra,Eif2b5,Cd44,Ctnnb1,Tgfbr1,Rhoa,Bmp7,Pea15a,Endog,Ctsz,Cd40,Serinc3,Mmp9,Dusp6,Ctgf,Il20ra,Timp3,Ascl1,Gnb2l1,Igfbp3,Map2k6,Slc9a3r1,Hif1a,Gadd45g,Hmgcr,Lats2,Rgcc,Clu,Trim35,Acin1,Vdr,Bcl6,Pak2,Robo1,Sod1,Rps6ka2,Xdh,Eif2ak2,Cyp1b1,Smad4,Pmaip1,Fas,Ankrd1,Gal,Maged1,Casp1,Stk17b,Ppm1f,Itm2c,Atf6,Acvr1c,Gsn,Frzb,Itga6,Zc3h8,Ctnnbl1,Anxa5,Ppid,Casp6,Bcl…	1.19e-07	6.99e-06	Positive regulation of apoptotic process	25.117
Process	GO:0072359	218	936	10090	10090.ENSMUSP00000000095,10090.ENSMUSP00000000122,10090.ENSMUSP00000000193,10090.ENSMUSP00000000542,10090.ENSMUSP00000000579,10090.ENSMUSP00000001319,10090.ENSMUSP00000001548,10090.ENSMUSP00000001780,10090.ENSMUSP00000001963,10090.ENSMUSP00000002320,10090.ENSMUSP00000002708,10090.ENSMUSP00000003964,10090.ENSMUSP00000004208,10090.ENSMUSP00000004990,10090.ENSMUSP00000005066,10090.ENSMUSP00000005279…	Tbx2,Ngfr,Ccl2,Acvrl1,Sox9,Efnb2,Itga3,Akt1,Ace,Ppard,Shh,Gys1,Angptl2,Mapk14,Map2k1,Klf5,Ctnnb1,Tgfbr1,Elk3,Bmp7,Ap1b1,Adam19,Cacybp,Myh9,Mmp9,Slc22a5,D17Wsu104e,Hdac2,Ctgf,Ascl1,Gna13,Adap2,Nxn,Hif1a,Ryr2,Fgf9,Loxl2,Rb1,Ywhaz,Angpt1,Cby1,Cxadr,Robo1,Adamts1,Nus1,Rps6ka2,Cyp1b1,Smad4,Zfand5,Ankrd1,Smarca2,Slc1a1,Itgb8,Mmp19,Ric8,Chm,Smad7,Jag1,Spred1,Lef1,Lmna,Apoa1bp,Cyr61,B4galt1,Ift74,Pdpn,Tn…	1.19e-07	6.99e-06	Circulatory system development	23.2906
Function	GO:0008092	220	947	10090	10090.ENSMUSP00000000590,10090.ENSMUSP00000000939,10090.ENSMUSP00000001479,10090.ENSMUSP00000001963,10090.ENSMUSP00000002029,10090.ENSMUSP00000002889,10090.ENSMUSP00000003575,10090.ENSMUSP00000004646,10090.ENSMUSP00000005234,10090.ENSMUSP00000005256,10090.ENSMUSP00000005509,10090.ENSMUSP00000005798,10090.ENSMUSP00000006467,10090.ENSMUSP00000007959,10090.ENSMUSP00000008893,10090.ENSMUSP00000009003…	Rdx,Hip1r,Kpnb1,Ace,Emd,Flii,Tpm4,Coro1c,Wdr1,Ndrg1,Stx1a,Snx6,Arpc2,Rhoa,Coro1b,Rala,Spire2,Fsd1,Cacybp,Fnta,Wasf3,Myh9,Pfn1,Gabarap,Ndel1,Gipc1,Egfr,Drg1,Pfn4,Kif3c,Rab10,Slc9a3r1,Coro6,Slc6a4,Fam101b,Cap2,Agtpbp1,Vcl,Clu,Dpysl2,Klhl1,Cct5,Adcy8,Twf1,Vapa,Epb4.1l4a,Impact,Dpysl3,Smad4,Ankrd1,Rela,P4hb,Ankrd2,Sbds,Dctn2,Farp1,Rab29,Ccdc181,Kif5c,Gsn,Strbp,Snap25,Snph,Kif3b,Mapre1,Stmn2,Fam83d,Cn…	1.23e-07	1.32e-05	Cytoskeletal protein binding	23.2313
Process	GO:0008361	71	212	10090	10090.ENSMUSP00000000127,10090.ENSMUSP00000000590,10090.ENSMUSP00000000641,10090.ENSMUSP00000001347,10090.ENSMUSP00000001780,10090.ENSMUSP00000004326,10090.ENSMUSP00000004920,10090.ENSMUSP00000007959,10090.ENSMUSP00000015137,10090.ENSMUSP00000015486,10090.ENSMUSP00000017900,10090.ENSMUSP00000018651,10090.ENSMUSP00000018880,10090.ENSMUSP00000021077,10090.ENSMUSP00000022629,10090.ENSMUSP00000025993…	Wnt3,Rdx,Sema4f,Rnd2,Akt1,Plxna3,Ulk2,Rhoa,Limk1,Xk,Slc12a7,Trpv2,Ndel1,Slc9a3r1,Dpysl2,Slit1,Cln8,Sema3c,Sema3a,Cdk5,Draxin,Sema3d,Rufy3,Mtpn,Ret,Pak1,Ilk,Fgf13,Ist1,Vav3,Sema7a,Lrp1,Ttl,Map3k13,Trpc5,Dscam,Vav2,Ptprs,Ep300,Sema5a,Sema3e,Myo5b,Efna5,Map2,Rac1,Aqp11,Cdkl5,Adnp,Rgma,Deptor,Lars,Slc12a5,Cttn,Rap1gap2,Rtn4,L1cam,Arhgap5,Akt3,Tnr,Tsc1,Plxna4,Slc12a2,Ahr,Cfl1,Disc1,Msn,Rnf6,Slit2,Sema…	1.25e-07	7.26e-06	Regulation of cell size	33.4906
Function	GO:0042803	162	647	10090	10090.ENSMUSP00000000058,10090.ENSMUSP00000000305,10090.ENSMUSP00000000939,10090.ENSMUSP00000001416,10090.ENSMUSP00000001780,10090.ENSMUSP00000002808,10090.ENSMUSP00000003575,10090.ENSMUSP00000004137,10090.ENSMUSP00000004327,10090.ENSMUSP00000005077,10090.ENSMUSP00000005798,10090.ENSMUSP00000006611,10090.ENSMUSP00000006692,10090.ENSMUSP00000014370,10090.ENSMUSP00000014743,10090.ENSMUSP00000016771…	Cav2,Tpd52l1,Hip1r,Hars,Akt1,Prkra,Tpm4,Gstm7,G6pdx,Hspb1,Snx6,Srm,Mvd,Cacybp,Csf1,Myh9,Rab11fip4,Pip4k2b,Pnpo,Fxr2,Pank3,Uhrf1bp1l,Pex7,Gnb2l1,Tkt,Bcl2l2,Adcy8,Cby1,Naga,Pvrl3,Tfrc,Ache,Abcg1,Xdh,Syt4,Tap2,Smad4,Rela,Rdh5,Tmem192,Mkln1,Stom,Cat,Ext2,Sppl2a,Nfs1,S100a11,Bcl10,Nr4a3,Txn1,Glipr2,Mmachc,Cda,Klhl7,Tesc,Scarb2,Abcg2,Add2,Lrp6,Bhlhe41,Prmt8,Nr2f2,Dgat2,Crym,Klhl2,Pvrl1,AI118078,Snx1,Hi…	1.29e-07	1.35e-05	Protein homodimerization activity	25.0386
Process	GO:0019637	177	724	10090	10090.ENSMUSP00000000001,10090.ENSMUSP00000000260,10090.ENSMUSP00000000642,10090.ENSMUSP00000002320,10090.ENSMUSP00000002549,10090.ENSMUSP00000003572,10090.ENSMUSP00000003720,10090.ENSMUSP00000003850,10090.ENSMUSP00000004327,10090.ENSMUSP00000004381,10090.ENSMUSP00000005826,10090.ENSMUSP00000006557,10090.ENSMUSP00000006692,10090.ENSMUSP00000006764,10090.ENSMUSP00000006912,10090.ENSMUSP00000007959…	Gnai3,Gmpr,Hk2,Ppard,Abhd3,Gars,Crot,Itpkc,G6pdx,Lpcat3,Cs,Elovl1,Mvd,Aprt,Pip4k2a,Rhoa,Pgam1,Pip4k2c,Serinc3,Pip4k2b,Pnpo,Pank3,Smpdl3a,Nudt4,Pfkl,Gfpt2,Adcy1,Nampt,Cmpk2,Sh3yl1,Nme2,Sptlc2,Sgpp1,Ptdss1,Adcy2,Mccc2,Hexb,Hmgcr,Pdhb,Tkt,Adcy8,Atp5o,Nus1,Agpat4,Pla2g7,Rhoq,Pigf,Nudt3,Rfk,Pnliprp2,Pcyt2,Acot9,Hprt,Cln8,Uck2,Bpnt1,Agpat2,Entpd2,Lpcat4,Crls1,Fabp5,Acss2,Nfs1,Lrat,Gucy1b3,Apoa1bp,Nudt1…	1.34e-07	7.72e-06	Organophosphate metabolic process	24.4475
Component	GO:0098797	133	503	10090	10090.ENSMUSP00000000001,10090.ENSMUSP00000000058,10090.ENSMUSP00000000299,10090.ENSMUSP00000000542,10090.ENSMUSP00000001548,10090.ENSMUSP00000001592,10090.ENSMUSP00000002848,10090.ENSMUSP00000003038,10090.ENSMUSP00000003442,10090.ENSMUSP00000003550,10090.ENSMUSP00000003971,10090.ENSMUSP00000004646,10090.ENSMUSP00000005509,10090.ENSMUSP00000007130,10090.ENSMUSP00000007757,10090.ENSMUSP00000009875…	Gnai3,Cav2,Itgb2,Acvrl1,Itga3,Jup,Grin2d,Ap2a2,Cacnb3,Ncstn,Lin7b,Coro1c,Stx1a,Ctnnb1,Tgfbr1,Kcnd1,Cd40,Kcnab3,Atp6ap1,Cacng2,Gna13,Slc9a3r1,Grb2,Cacna2d3,Alcam,Tfrc,Gabbr1,Gnal,Gna14,Fas,Cnih2,Gfra1,Itgb8,Smad7,Gria4,Acvr1c,Itga6,Snap25,Glrb,Sdcbp,Stoml2,Grik3,Slc6a6,Ret,Lrp6,Sspn,Cdh5,Atp1b3,Cdh6,Kcnj2,Grm1,Atp1a1,Fzd8,Sntb1,Kcna2,Gng10,Psenen,Kcnk1,Kcnh2,Grin3b,Cdh20,Eps8,Abhd12,Itga2,Erbb2,Kc…	1.41e-07	3.24e-06	Plasma membrane protein complex	26.4414
KEGG	mmu04010	88	289	10090	10090.ENSMUSP00000000122,10090.ENSMUSP00000000186,10090.ENSMUSP00000001780,10090.ENSMUSP00000002487,10090.ENSMUSP00000003442,10090.ENSMUSP00000004990,10090.ENSMUSP00000005066,10090.ENSMUSP00000005077,10090.ENSMUSP00000007757,10090.ENSMUSP00000009550,10090.ENSMUSP00000014743,10090.ENSMUSP00000016672,10090.ENSMUSP00000019290,10090.ENSMUSP00000020118,10090.ENSMUSP00000020329,10090.ENSMUSP00000020949…	Ngfr,Fgf23,Akt1,Braf,Cacnb3,Mapk14,Map2k1,Hspb1,Tgfbr1,Elk1,Csf1,Mapkapk2,Cacng2,Dusp6,Egfr,Map2k6,Grb2,Ppm1a,Fos,Gadd45g,Fgf9,Cacna2d3,Angpt1,Pak2,Rps6ka2,Fas,Rela,Map4k2,Nras,Efna3,Stmn1,Map3k6,Tgfa,Tnfrsf1a,Pak1,Dusp4,Rasgrf1,Mras,Myd88,Flt3,Map2k4,Rras,Rps6ka5,Gadd45a,Fgf1,Dusp10,Map3k13,Dusp5,Mapk3,Ppp3ca,Erbb2,Cdc42,Cd14,Ptprr,Rap1b,Sos1,Rras2,Prkcb,Nf1,Efna5,Hspa2,Rac1,Cacng3,Mapk11,Mekk4,…	1.47e-07	1.22e-05	MAPK signaling pathway	30.4498
Process	GO:0032386	97	331	10090	10090.ENSMUSP00000000193,10090.ENSMUSP00000000543,10090.ENSMUSP00000000590,10090.ENSMUSP00000001592,10090.ENSMUSP00000002029,10090.ENSMUSP00000002708,10090.ENSMUSP00000003442,10090.ENSMUSP00000004990,10090.ENSMUSP00000005066,10090.ENSMUSP00000006467,10090.ENSMUSP00000014920,10090.ENSMUSP00000018880,10090.ENSMUSP00000019939,10090.ENSMUSP00000020846,10090.ENSMUSP00000020986,10090.ENSMUSP00000021514…	Ccl2,Grasp,Rdx,Jup,Emd,Shh,Cacnb3,Mapk14,Map2k1,Arpc2,Nol3,Ndel1,Snx3,Srebf1,Dnajc27,Ppm1a,Angpt1,Mief1,Nus1,Pmaip1,Ehd1,Cnih2,Rab29,Uhmk1,Stom,Ptpn1,Txn1,Pink1,Cdk5,Tomm7,Rufy3,Camk1,Tnfrsf1a,Ipo5,Pak1,Nucb1,Anxa2,Tmem30a,Reep2,Fam115a,BC018507,Ptpn23,Atp13a2,Zdhhc2,Cd81,Inpp5f,Camk4,Mlc1,Mapk3,Erbb2,Gcc2,Cdc42,Sh3tc2,Pik3r1,Kcnb1,Sorl1,Slc35d3,Insig1,Cemip,Ezr,Atpif1,Sp100,Khdrbs1,Ep300,Ppp1r12…	1.55e-07	8.94e-06	Regulation of intracellular transport	29.3051
WikiPathways	WP523	56	150	10090	10090.ENSMUSP00000000186,10090.ENSMUSP00000000590,10090.ENSMUSP00000001652,10090.ENSMUSP00000002487,10090.ENSMUSP00000005066,10090.ENSMUSP00000006912,10090.ENSMUSP00000007959,10090.ENSMUSP00000013970,10090.ENSMUSP00000015137,10090.ENSMUSP00000018437,10090.ENSMUSP00000018691,10090.ENSMUSP00000020329,10090.ENSMUSP00000020930,10090.ENSMUSP00000021283,10090.ENSMUSP00000022369,10090.ENSMUSP00000022545…	Fgf23,Rdx,Bdkrb2,Braf,Map2k1,Pip4k2a,Rhoa,Pip4k2c,Limk1,Pfn1,Pip4k2b,Egfr,Gna13,Pik3r5,Vcl,Fgf9,Pak2,Gsn,Nras,Slc9a1,Pak1,Fgf13,Mras,Mapk6,Rras,Fgf1,Pip5kl1,Mapk3,Cdc42,Cd14,Pik3r1,F2r,Pik3cg,Ezr,Sos1,Ppp1r12a,Rras2,Actg1,Arhgap35,Arpc5,Rac1,Wasf2,Mapk4,Fgf14,Pak6,Fgf12,Actb,Fgf11,Fgf3,Arhgef7,Cfl1,Msn,Ssh1,Bcar1,Chrm2,Chrm3	1.56e-07	1.55e-05	Regulation of actin cytoskeleton	37.3333
NetworkNeighborAL	CL:18324	62	175	10090	10090.ENSMUSP00000000109,10090.ENSMUSP00000002848,10090.ENSMUSP00000006828,10090.ENSMUSP00000019290,10090.ENSMUSP00000022629,10090.ENSMUSP00000025379,10090.ENSMUSP00000025805,10090.ENSMUSP00000027020,10090.ENSMUSP00000030637,10090.ENSMUSP00000030676,10090.ENSMUSP00000030814,10090.ENSMUSP00000030986,10090.ENSMUSP00000033915,10090.ENSMUSP00000034076,10090.ENSMUSP00000034912,10090.ENSMUSP00000043074…	Cntn1,Grin2d,Aplp1,Cacng2,Dpysl2,Dpysl3,Cnih2,Gria4,Ncdn,Grik3,Cdk5,Lrpap1,Gpm6a,Cbln1,Rasgrf1,Sncb,Cnst,Grin3b,Abhd12,Gldn,Sorl1,Lrrc4,Grin2b,Chl1,Nlgn3,Shisa6,Negr1,Ntm,Gria3,Tspan7,Porcn,Lsamp,Homer1,Syngap1,Cacng3,Cntn2,Dpysl5,Cntn6,Slitrk3,Ank3,Rasgrf2,Prkcg,Epb4.1l1,L1cam,Dab1,Shank1,Iglon5,Lrfn1,Crmp1,Cntnap2,Grik4,Opcml,Grin2a,Ank1,Igsf9b,Lhfpl4,Lrrtm1,Mdga1,Abhd6,Ncam1,Lrrc4c,Cacng8	1.58e-07	0.00077	Mixed, incl. neurotransmitter receptor complex, and protein-protein interactions at synapses	35.4286
Function	GO:0019904	187	778	10090	10090.ENSMUSP00000000001,10090.ENSMUSP00000000127,10090.ENSMUSP00000000543,10090.ENSMUSP00000000590,10090.ENSMUSP00000000939,10090.ENSMUSP00000001479,10090.ENSMUSP00000001548,10090.ENSMUSP00000001566,10090.ENSMUSP00000002284,10090.ENSMUSP00000003038,10090.ENSMUSP00000003971,10090.ENSMUSP00000004202,10090.ENSMUSP00000005003,10090.ENSMUSP00000005509,10090.ENSMUSP00000007130,10090.ENSMUSP00000007236…	Gnai3,Wnt3,Grasp,Rdx,Hip1r,Kpnb1,Itga3,Tubb5,Plaur,Ap2a2,Lin7b,Dnmt1,Lbr,Stx1a,Ctnnb1,Syngr3,Rhoa,Dynll1,Adam19,Cacybp,Nol3,Myh9,Cd40,Ywhab,Slc22a5,Gipc1,Hdac2,Atp2b1,Slc22a4,Gnb2l1,Rufy1,Ddx5,Slc9a3r1,Grb2,Hif1a,Angel1,Scamp1,Nefl,Rb1,Bcl2l2,Ywhaz,Khdrbs3,Cxadr,Robo1,Ets2,Calcoco1,Vapa,Rhoq,Caskin1,Dpysl3,Osbp,Apba1,Rela,Casp1,Khdrbs2,Vim,Snap25,Lef1,Bcl10,Vcp,Tln1,Pink1,Casp9,Dffa,Cct6a,Dtx1,Ra…	1.6e-07	1.57e-05	Protein domain specific binding	24.036
Process	GO:1902533	223	967	10090	10090.ENSMUSP00000000058,10090.ENSMUSP00000000122,10090.ENSMUSP00000000186,10090.ENSMUSP00000000193,10090.ENSMUSP00000000305,10090.ENSMUSP00000000579,10090.ENSMUSP00000001780,10090.ENSMUSP00000002320,10090.ENSMUSP00000002487,10090.ENSMUSP00000002808,10090.ENSMUSP00000004137,10090.ENSMUSP00000005066,10090.ENSMUSP00000005218,10090.ENSMUSP00000006750,10090.ENSMUSP00000007130,10090.ENSMUSP00000007757…	Cav2,Ngfr,Fgf23,Ccl2,Tpd52l1,Sox9,Akt1,Ppard,Braf,Prkra,Gstm7,Map2k1,Cd44,Rundc3a,Ctnnb1,Tgfbr1,Rhoa,Gprc5b,Csf1,C1qtnf1,Timp2,Cd40,Serinc3,Adora2b,Wwc1,Atp6ap1,D17Wsu104e,Ctgf,Il20ra,Egfr,Gnb2l1,Igfbp3,Map2k6,Dnajc27,Ccl7,Ddx5,Slc9a3r1,Pik3r5,Chga,Gadd45g,Hmgcr,F2rl1,Fgf9,Clu,Spry2,Angpt1,Sharpin,Tfrc,Robo1,Sod1,Xdh,Eif2ak2,Pmaip1,Seh1l,Ankrd1,Peli3,Rela,Map4k2,Maged1,Casp1,Tnfrsf11a,Cat,Spred1,…	1.62e-07	9.31e-06	Positive regulation of intracellular signal transduction	23.061
Keyword	KW-0524	83	269	10090	10090.ENSMUSP00000000122,10090.ENSMUSP00000000641,10090.ENSMUSP00000001319,10090.ENSMUSP00000001780,10090.ENSMUSP00000002305,10090.ENSMUSP00000003501,10090.ENSMUSP00000004673,10090.ENSMUSP00000004920,10090.ENSMUSP00000007130,10090.ENSMUSP00000014447,10090.ENSMUSP00000018880,10090.ENSMUSP00000019516,10090.ENSMUSP00000020243,10090.ENSMUSP00000021380,10090.ENSMUSP00000022629,10090.ENSMUSP00000023600…	Ngfr,Sema4f,Efnb2,Akt1,Kdm7a,Elavl3,Ndrg2,Ulk2,Ctnnb1,Glis2,Ndel1,Nrbp2,Ascl1,Trappc6b,Dpysl2,Robo1,Impact,Smarca2,Slit1,Sema3c,Stmn1,Sema3a,Cdk5,Sema3d,Rufy3,Camk1,Fgf13,Gpm6a,Gdpd5,Atcay,Camk1d,Tox,Brsk1,Rbm45,Ina,Sema7a,Pou3f3,Bend6,Cdc42,Arf6,Dscam,Gldn,2510009E07Rik,Chl1,Slit3,Adcyap1,Zfp365,Nav1,Sema5a,Sirt2,Sema3e,Btbd3,Tubb2b,Efna5,Sox11,Numbl,Zic3,Vxn,Zhx2,Gap43,Rtn4,L1cam,Ephb2,Amigo1,D…	2.08e-07	5.96e-06	Neurogenesis	30.855
Process	GO:0030335	145	567	10090	10090.ENSMUSP00000000193,10090.ENSMUSP00000000579,10090.ENSMUSP00000000590,10090.ENSMUSP00000000641,10090.ENSMUSP00000001548,10090.ENSMUSP00000001780,10090.ENSMUSP00000002303,10090.ENSMUSP00000002708,10090.ENSMUSP00000004715,10090.ENSMUSP00000004990,10090.ENSMUSP00000005066,10090.ENSMUSP00000005073,10090.ENSMUSP00000005077,10090.ENSMUSP00000005255,10090.ENSMUSP00000006467,10090.ENSMUSP00000007757…	Ccl2,Sox9,Rdx,Sema4f,Itga3,Akt1,Rhoc,Shh,Mospd2,Mapk14,Map2k1,Zp3,Hspb1,Wisp1,Arpc2,Tgfbr1,Rhoa,Bmp7,Csf1,Cd40,Mmp9,Pfn1,Adora2b,Mcu,Egfr,Gnb2l1,Ccl7,Hif1a,F2rl1,Plk2,Fgf9,Spry2,Angpt1,Adamts1,Nus1,Pla2g7,Cyp1b1,Podxl,Ptp4a1,Ppm1f,Itga6,S100a11,Lef1,Cyr61,Cpne3,Sdcbp,Nr4a3,Epb4.1l4b,Glipr2,Pdpn,Sema3c,Sema3a,Sema3d,Rufy3,Ret,Maz,Pak1,Stx4a,Ilk,Gpr124,Cx3cl1,Cdh5,Mcam,Ctsh,Camk1d,Irs2,Jcad,Fam110c…	2.1e-07	1.18e-05	Positive regulation of cell migration	25.5732
Process	GO:1901135	193	814	10090	10090.ENSMUSP00000000001,10090.ENSMUSP00000000260,10090.ENSMUSP00000000573,10090.ENSMUSP00000000642,10090.ENSMUSP00000001780,10090.ENSMUSP00000002320,10090.ENSMUSP00000003720,10090.ENSMUSP00000004327,10090.ENSMUSP00000004968,10090.ENSMUSP00000005218,10090.ENSMUSP00000005826,10090.ENSMUSP00000006557,10090.ENSMUSP00000006692,10090.ENSMUSP00000006697,10090.ENSMUSP00000006764,10090.ENSMUSP00000007959…	Gnai3,Gmpr,Ovgp1,Hk2,Akt1,Ppard,Crot,G6pdx,Plod3,Cd44,Cs,Elovl1,Mvd,Itih3,Aprt,Rhoa,Pgam1,Pank3,Nudt4,Pfkl,Gfpt2,Adcy1,Cmpk2,Nme2,Hif1a,Habp4,Adcy2,Mccc2,Hexb,Hmgcr,Pdhb,Tkt,Angpt1,Adcy8,Naga,Pmm1,Atp5o,Nus1,Pim1,Rhoq,Pigf,Nudt3,Rfk,Pnliprp2,Fn3k,Hexa,Acot9,Itgb8,Hprt,St8sia2,Parp1,Uck2,Ext2,Acss2,Serp1,Extl2,Gucy1b3,Ugcg,B4galt1,Stoml2,Gba2,Npr2,Ctps,Fuca1,Akr1a1,Cmpk1,Cda,Nmnat1,Man2b2,Ugdh,Gnp…	2.28e-07	1.28e-05	Carbohydrate derivative metabolic process	23.7101
Process	GO:0007411	75	234	10090	10090.ENSMUSP00000000122,10090.ENSMUSP00000000127,10090.ENSMUSP00000000641,10090.ENSMUSP00000001319,10090.ENSMUSP00000002708,10090.ENSMUSP00000004326,10090.ENSMUSP00000009143,10090.ENSMUSP00000017868,10090.ENSMUSP00000022629,10090.ENSMUSP00000023312,10090.ENSMUSP00000023600,10090.ENSMUSP00000025393,10090.ENSMUSP00000025993,10090.ENSMUSP00000026994,10090.ENSMUSP00000027740,10090.ENSMUSP00000028102…	Ngfr,Wnt3,Sema4f,Efnb2,Shh,Plxna3,Bmp7,Etv4,Dpysl2,Alcam,Robo1,Smad4,Slit1,Unc5a,Lhx4,Kif5c,Efna3,Nr4a3,Sema3c,Sema3a,Cdk5,Draxin,Sema3d,Pvrl1,Isl2,Egr2,Sema7a,Lama1,Lrp1,Gbx2,Epha10,Plxnb2,Flrt3,Erbb2,Dscam,Nog,Flrt2,Neo1,Chl1,Epha3,Epha6,Slit3,Sema5a,Tubb3,Sema3e,Arhgap35,Efna5,Ptpro,Rac1,Cntn2,Notch3,Dpysl5,Cntn6,Trio,Ank3,Etv1,Scn1b,Kif5a,Plxnc1,Gap43,L1cam,Gata3,Ephb2,Unc5c,Vstm2l,Klf7,Crmp1…	2.35e-07	1.31e-05	Axon guidance	32.0513
Process	GO:0050807	84	275	10090	10090.ENSMUSP00000001566,10090.ENSMUSP00000002412,10090.ENSMUSP00000004990,10090.ENSMUSP00000007959,10090.ENSMUSP00000022894,10090.ENSMUSP00000025993,10090.ENSMUSP00000026635,10090.ENSMUSP00000026670,10090.ENSMUSP00000029297,10090.ENSMUSP00000030164,10090.ENSMUSP00000030787,10090.ENSMUSP00000030814,10090.ENSMUSP00000031249,10090.ENSMUSP00000032409,10090.ENSMUSP00000033915,10090.ENSMUSP00000034076…	Tubb5,Ncan,Mapk14,Rhoa,Ywhaz,Slit1,Farp1,Nptx1,Slc7a11,Vcp,Rheb,Cdk5,Sparcl1,Camk1,Gpm6a,Cbln1,Egln1,Pvrl1,Tanc1,Six4,Clstn1,Hnrnpk,Ptprf,Camkv,Zdhhc2,Zfp804a,Pcdh8,Rims4,Lrrc4b,Flrt3,Fzd9,Cdc42,Arf6,Abhd17b,Pik3r1,Lingo4,Fzd1,Sipa1l1,Lrrc24,Flrt2,Grin2b,Adam10,Ptprs,Slitrk4,Dnm3,Nlgn3,Shisa6,Pgrmc1,Myo5b,Drd2,Efna5,Ptpro,Slitrk6,Homer1,Cdkl5,Adnp,Slitrk3,Tuba1a,Snap91,Sorbs1,Slitrk1,Ptn,Cttn,Gap…	2.5e-07	1.38e-05	Regulation of synapse organization	30.5455
Process	GO:0006886	182	759	10090	10090.ENSMUSP00000000122,10090.ENSMUSP00000000543,10090.ENSMUSP00000001479,10090.ENSMUSP00000001780,10090.ENSMUSP00000002063,10090.ENSMUSP00000002790,10090.ENSMUSP00000002840,10090.ENSMUSP00000003038,10090.ENSMUSP00000003117,10090.ENSMUSP00000004508,10090.ENSMUSP00000005077,10090.ENSMUSP00000005509,10090.ENSMUSP00000005798,10090.ENSMUSP00000006181,10090.ENSMUSP00000009157,10090.ENSMUSP00000009234…	Ngfr,Grasp,Kpnb1,Akt1,Ap4e1,Cse1l,Pex6,Ap2a2,Ap1m1,Tmed4,Hspb1,Stx1a,Snx6,Napa,Dynll1,Ap1b1,Syngr1,Dnajc19,Tomm34,Ywhab,Cacng2,Gipc1,Pex7,Tbc1d15,Ap3d1,Dnajc27,Rab10,Ddx5,Rab37,Stx8,Gosr2,Srp54a,Rab15,Kpna3,Fgf9,Dnajc15,Ywhaz,Samm50,Pmm1,Dscr3,Polr2d,Ehd1,Apba1,Chm,Rab29,Stx6,Kif5c,Nup35,Napb,Snx16,Eif6,Sec62,Ssr3,Lmna,Zdhhc21,Nol6,Vcp,Ift74,Stx12,Cdk5,Tomm7,Pmpcb,Nsg1,Sdad1,Scarb2,Vps33a,Ift81,R…	2.69e-07	1.48e-05	Intracellular protein transport	23.9789
Component	GO:0098839	46	113	10090	10090.ENSMUSP00000001319,10090.ENSMUSP00000002848,10090.ENSMUSP00000003971,10090.ENSMUSP00000005077,10090.ENSMUSP00000019290,10090.ENSMUSP00000020706,10090.ENSMUSP00000023334,10090.ENSMUSP00000025805,10090.ENSMUSP00000027020,10090.ENSMUSP00000030676,10090.ENSMUSP00000036962,10090.ENSMUSP00000037255,10090.ENSMUSP00000039368,10090.ENSMUSP00000044168,10090.ENSMUSP00000046129,10090.ENSMUSP00000046358…	Efnb2,Grin2d,Lin7b,Hspb1,Cacng2,Adcy1,Pvrl3,Cnih2,Gria4,Grik3,Clstn1,Grm1,Ptprf,Pacsin1,Akap9,Dagla,Grin3b,Oprd1,D3Bwg0562e,Lrrc4b,Sigmar1,Abhd17b,Adra2c,Lrrc4,Grin2b,Ptprs,Rgs7bp,Shisa6,Gria3,Ptpro,Scn8a,Cacng3,Slitrk3,Cacng7,Slitrk1,Rtn4,Lrfn1,Grik4,Dcc,Grin2a,Abhd17c,Erbb4,Prrt2,Lrrc4c,Cacng8,Chrm3	2.8e-07	6.32e-06	Postsynaptic density membrane	40.708
Function	GO:0032561	103	365	10090	10090.ENSMUSP00000000001,10090.ENSMUSP00000001347,10090.ENSMUSP00000001513,10090.ENSMUSP00000001566,10090.ENSMUSP00000002303,10090.ENSMUSP00000003451,10090.ENSMUSP00000007959,10090.ENSMUSP00000009003,10090.ENSMUSP00000020741,10090.ENSMUSP00000020930,10090.ENSMUSP00000020986,10090.ENSMUSP00000021001,10090.ENSMUSP00000021076,10090.ENSMUSP00000021217,10090.ENSMUSP00000021407,10090.ENSMUSP00000021459…	Gnai3,Rnd2,Tubb6,Tubb5,Rhoc,Rnd1,Rhoa,Rala,Drg1,Gna13,Dnajc27,Rab10,Rab37,Nme2,Srp54a,Rab15,Glud1,Rhobtb2,Mief1,Ehd3,Rhoq,Gnal,Gna14,Ehd1,Arl8a,Rab29,Ehd4,Nras,Gucy1b3,Rit1,Npr2,Gnl2,Rheb,Rab35,Rasl11a,Tuba8,Fkbp4,Rab30,Rab6a,Srpr,Mras,Rab6b,Srprb,Irgq,Pck2,Rragb,Tsr1,Rhov,Rras,Eef1a1,Mfhas1,Rasl10a,Tuba1c,Rasl11b,Cdc42,Diras2,Arf6,Hist1h1e,Gnai2,Rabl6,Gimap6,Rhoj,Samhd1,Tubb2a,Rab39,Dnm3,Rab7b,R…	2.95e-07	2.81e-05	Guanyl ribonucleotide binding	28.2192
Process	GO:0045927	90	304	10090	10090.ENSMUSP00000000095,10090.ENSMUSP00000000127,10090.ENSMUSP00000001347,10090.ENSMUSP00000001780,10090.ENSMUSP00000002320,10090.ENSMUSP00000004964,10090.ENSMUSP00000004990,10090.ENSMUSP00000005073,10090.ENSMUSP00000005255,10090.ENSMUSP00000007757,10090.ENSMUSP00000007959,10090.ENSMUSP00000014743,10090.ENSMUSP00000015137,10090.ENSMUSP00000018651,10090.ENSMUSP00000018880,10090.ENSMUSP00000020323…	Tbx2,Wnt3,Rnd2,Akt1,Ppard,Pou1f1,Mapk14,Zp3,Wisp1,Tgfbr1,Rhoa,Csf1,Limk1,Trpv2,Ndel1,Avpr1a,Egfr,Fgf9,Pim1,Syt4,Smad7,Ppm1f,Serp1,Lef1,Sdcbp,Slc9a1,Cd38,Rufy3,Mtpn,Ybx3,Pak1,Ilk,Sash3,Acsl4,Sfrp1,Ist1,Pin1,Ppib,Flt3,Hnrnpk,Sema7a,Exosc2,Cd81,Lrp1,Sh3pxd2b,Map3k13,Trpc5,Zfpm2,Erbb2,Cdc42,Dscam,Ezr,Adam10,Ep300,Adnp2,Sema5a,Yap1,Celf1,Myo5b,Drd2,Efna5,Atp8a2,Hopx,Cdkl5,Adnp,Ncoa3,Mmp14,Insr,Naca,Ca…	2.97e-07	1.62e-05	Positive regulation of growth	29.6053
Process	GO:0050803	86	286	10090	10090.ENSMUSP00000001566,10090.ENSMUSP00000002412,10090.ENSMUSP00000004990,10090.ENSMUSP00000007959,10090.ENSMUSP00000022894,10090.ENSMUSP00000025993,10090.ENSMUSP00000026635,10090.ENSMUSP00000026670,10090.ENSMUSP00000029297,10090.ENSMUSP00000030164,10090.ENSMUSP00000030787,10090.ENSMUSP00000030814,10090.ENSMUSP00000031249,10090.ENSMUSP00000032409,10090.ENSMUSP00000032710,10090.ENSMUSP00000033915…	Tubb5,Ncan,Mapk14,Rhoa,Ywhaz,Slit1,Farp1,Nptx1,Slc7a11,Vcp,Rheb,Cdk5,Sparcl1,Camk1,Slc17a6,Gpm6a,Cbln1,Egln1,Pvrl1,Tanc1,Six4,Clstn1,Hnrnpk,Ptprf,Camkv,Zdhhc2,Zfp804a,Pcdh8,Rims4,Lrrc4b,Flrt3,Fzd9,Cdc42,Arf6,Abhd17b,Pik3r1,Lingo4,Fzd1,Sipa1l1,Lrrc24,Flrt2,Grin2b,Adam10,Ptprs,Slitrk4,Dnm3,Nlgn3,Shisa6,Pgrmc1,Myo5b,Drd2,Efna5,Ptpro,Slitrk6,Homer1,Syngap1,Cdkl5,Adnp,Slitrk3,Tuba1a,Snap91,Sorbs1,Slit…	3.15e-07	1.7e-05	Regulation of synapse structure or activity	30.0699
WikiPathways	WP4346	29	52	10090	10090.ENSMUSP00000001507,10090.ENSMUSP00000005003,10090.ENSMUSP00000006692,10090.ENSMUSP00000007005,10090.ENSMUSP00000010807,10090.ENSMUSP00000020846,10090.ENSMUSP00000021684,10090.ENSMUSP00000022176,10090.ENSMUSP00000022977,10090.ENSMUSP00000024829,10090.ENSMUSP00000025567,10090.ENSMUSP00000025713,10090.ENSMUSP00000026221,10090.ENSMUSP00000027356,10090.ENSMUSP00000030010,10090.ENSMUSP00000033509…	Cyp51,Lbr,Mvd,Acat2,Fads1,Srebf1,Cyp46a1,Hmgcr,Sqle,Abcg1,Fads2,Tm7sf2,Scd2,Cyp27a1,Abca1,Ebp,Acsl4,Nsdhl,Msmo1,Acsl1,Acat1,Scd1,Dhcr24,Lss,Mylip,Sc5d,Ggps1,Hmgcs1,Soat1	3.54e-07	2.34e-05	Cholesterol metabolism with Bloch and Kandutsch-Russell pathways	55.7692
Component	GO:0010008	108	392	10090	10090.ENSMUSP00000004173,10090.ENSMUSP00000004646,10090.ENSMUSP00000005256,10090.ENSMUSP00000005798,10090.ENSMUSP00000005952,10090.ENSMUSP00000014694,10090.ENSMUSP00000017783,10090.ENSMUSP00000019939,10090.ENSMUSP00000019962,10090.ENSMUSP00000020329,10090.ENSMUSP00000020420,10090.ENSMUSP00000020537,10090.ENSMUSP00000020643,10090.ENSMUSP00000020909,10090.ENSMUSP00000021001,10090.ENSMUSP00000021195…	Cdip1,Coro1c,Ndrg1,Snx6,Slc30a4,Zfyve20,Rab11fip4,Snx3,Cd164,Egfr,Ap3d1,Nsg2,Rufy1,Laptm4a,Rab10,Slc6a4,Stx8,Gosr2,Scamp1,Tfrc,Ehd3,Mic1,Ehd1,Slc1a1,Ifitm3,Abcb6,Arl8a,Grb14,Ehd4,Sppl2a,Snx16,Lamtor2,Cd1d1,Leprot,Ncdn,Stx12,Nsg1,Vps33a,Rab35,Snx8,Ret,Slc9a9,Praf2,Mvb12a,Ldlr,Anxa2,Stoml1,Snx1,Cmtm6,Clvs1,Scamp5,Sppl2b,Zdhhc1,Rep15,Snx2,Fig4,Atp13a2,Rhov,Zdhhc2,Micall1,Parm1,Spns2,Dagla,Ap5m1,Tspa…	4.08e-07	8.98e-06	Endosome membrane	27.551
COMPARTMENTS	GOCC:0099146	36	77	10090	10090.ENSMUSP00000001319,10090.ENSMUSP00000002848,10090.ENSMUSP00000019290,10090.ENSMUSP00000020706,10090.ENSMUSP00000023334,10090.ENSMUSP00000025805,10090.ENSMUSP00000027020,10090.ENSMUSP00000036962,10090.ENSMUSP00000037255,10090.ENSMUSP00000039368,10090.ENSMUSP00000048576,10090.ENSMUSP00000050077,10090.ENSMUSP00000052306,10090.ENSMUSP00000053123,10090.ENSMUSP00000056099,10090.ENSMUSP00000059705…	Efnb2,Grin2d,Cacng2,Adcy1,Pvrl3,Cnih2,Gria4,Clstn1,Grm1,Ptprf,Grin3b,Oprd1,D3Bwg0562e,Lrrc4b,Abhd17b,Adra2c,Lrrc4,Grin2b,Ptprs,Rgs7bp,Shisa6,Gria3,Ptpro,Scn8a,Cacng3,Slitrk3,Cacng7,Slitrk1,Rtn4,Lrfn1,Dcc,Grin2a,Erbb4,Lrrc4c,Cacng8,Chrm3	4.18e-07	1.59e-05	Intrinsic component of postsynaptic density membrane	46.7532
Component	GO:0099146	36	77	10090	10090.ENSMUSP00000001319,10090.ENSMUSP00000002848,10090.ENSMUSP00000019290,10090.ENSMUSP00000020706,10090.ENSMUSP00000023334,10090.ENSMUSP00000025805,10090.ENSMUSP00000027020,10090.ENSMUSP00000036962,10090.ENSMUSP00000037255,10090.ENSMUSP00000039368,10090.ENSMUSP00000048576,10090.ENSMUSP00000050077,10090.ENSMUSP00000052306,10090.ENSMUSP00000053123,10090.ENSMUSP00000056099,10090.ENSMUSP00000059705…	Efnb2,Grin2d,Cacng2,Adcy1,Pvrl3,Cnih2,Gria4,Clstn1,Grm1,Ptprf,Grin3b,Oprd1,D3Bwg0562e,Lrrc4b,Abhd17b,Adra2c,Lrrc4,Grin2b,Ptprs,Rgs7bp,Shisa6,Gria3,Ptpro,Scn8a,Cacng3,Slitrk3,Cacng7,Slitrk1,Rtn4,Lrfn1,Dcc,Grin2a,Erbb4,Lrrc4c,Cacng8,Chrm3	4.18e-07	9.08e-06	Intrinsic component of postsynaptic density membrane	46.7532
COMPARTMENTS	GOCC:0005887	176	734	10090	10090.ENSMUSP00000000058,10090.ENSMUSP00000000299,10090.ENSMUSP00000000542,10090.ENSMUSP00000000572,10090.ENSMUSP00000001319,10090.ENSMUSP00000001548,10090.ENSMUSP00000001780,10090.ENSMUSP00000001824,10090.ENSMUSP00000002284,10090.ENSMUSP00000002848,10090.ENSMUSP00000003061,10090.ENSMUSP00000003550,10090.ENSMUSP00000005509,10090.ENSMUSP00000007757,10090.ENSMUSP00000009875,10090.ENSMUSP00000017799…	Cav2,Itgb2,Acvrl1,Gabra2,Efnb2,Itga3,Akt1,Folh1,Plaur,Grin2d,Bcam,Ncstn,Stx1a,Tgfbr1,Kcnd1,Cd40,Cacng2,Atp2b1,Il20ra,Mcu,Lgr5,Adcy1,Slc6a4,F2rl1,Cdhr1,Micu2,Ank,Adcy8,Alcam,Pvrl3,P2rx6,Tfrc,Ifnar1,Asic1,Xdh,Gabbr1,Cnih2,Slc1a1,Itgb8,Gria4,Acvr1c,Stom,Itga6,Snap25,Ccdc109b,Glrb,Mmp16,Sdcbp,Abca1,Slc2a1,Slc9a1,Grik3,Gabrd,Slc6a6,Ret,Slc2a3,Abcc8,Il13ra1,Slc6a8,Gpm6a,Pvrl1,Atp1b3,Myd88,Reep2,Clstn1,…	4.24e-07	1.59e-05	Integral component of plasma membrane	23.9782
Process	GO:0098609	109	398	10090	10090.ENSMUSP00000000299,10090.ENSMUSP00000000579,10090.ENSMUSP00000001592,10090.ENSMUSP00000005218,10090.ENSMUSP00000007130,10090.ENSMUSP00000009143,10090.ENSMUSP00000015791,10090.ENSMUSP00000016771,10090.ENSMUSP00000019962,10090.ENSMUSP00000020329,10090.ENSMUSP00000022337,10090.ENSMUSP00000022369,10090.ENSMUSP00000023312,10090.ENSMUSP00000023334,10090.ENSMUSP00000023572,10090.ENSMUSP00000023600…	Itgb2,Sox9,Jup,Cd44,Ctnnb1,Bmp7,Lama5,Myh9,Cd164,Egfr,Cdhr1,Vcl,Alcam,Pvrl3,Cxadr,Robo1,Cyp1b1,Ric8,Itga6,Slc7a11,Lef1,Cyr61,Tln1,Pdpn,Sparcl1,Add2,Ret,Olr1,Lrp6,Cbln1,Cx3cl1,Cdh5,Pvrl1,Mcam,Nt5e,Lpp,Clstn1,Cdh6,Vezt,Sdk2,Ppp1ca,Ptprf,Kirrel2,Podxl2,Erf,Thbs1,Pcdh8,Igsf21,Plxnb2,Cdh20,Lrrc4b,Flrt3,Nov,Cdc42,Pcdh20,Dscam,Gldn,Golph3,Fat4,Lrrc4,Ezr,Ptprs,Astn2,Cdh24,Nlgn3,Epha3,Cdh22,Negr1,Hmcn1,Cd…	4.6e-07	2.46e-05	Cell-cell adhesion	27.3869
TISSUES	BTO:0000156	130	501	10090	10090.ENSMUSP00000000260,10090.ENSMUSP00000000466,10090.ENSMUSP00000000542,10090.ENSMUSP00000001507,10090.ENSMUSP00000002303,10090.ENSMUSP00000002840,10090.ENSMUSP00000003964,10090.ENSMUSP00000008878,10090.ENSMUSP00000011029,10090.ENSMUSP00000015481,10090.ENSMUSP00000016401,10090.ENSMUSP00000016571,10090.ENSMUSP00000019044,10090.ENSMUSP00000020846,10090.ENSMUSP00000021380,10090.ENSMUSP00000021822…	Gmpr,Plin2,Acvrl1,Cyp51,Rhoc,Pex6,Gys1,Gprc5b,Dnajc19,Endog,Slmo2,Ndufa1,Slc22a5,Srebf1,Trappc6b,Ogn,Dnajc15,Rgcc,Mief1,Bcl6,Eif2ak2,Ankrd2,Scd2,Cyp27a1,Mrpl44,Grb14,Agpat2,Crls1,Ptpn1,Cd1d1,Prkaa2,Cdk5,Cd38,Sparcl1,Npy,Rtn2,Vkorc1,Stx4a,Nono,Tmem66,Rbl2,Cdh5,Egln1,Ctsh,Dpp8,Scd1,Tspo,Letmd1,Hspb6,Bicd2,Exoc3,Ubac1,Pdk2,Parm1,Pank1,Thbs1,Acsl5,Zbtb7a,S100a13,Coq5,C1qa,Arxes2,Pptc7,Ppp3ca,Lipa,Pik…	4.6e-07	4.07e-05	Brown adipose tissue	25.9481
Component	GO:0043204	68	208	10090	10090.ENSMUSP00000000122,10090.ENSMUSP00000000193,10090.ENSMUSP00000000641,10090.ENSMUSP00000005066,10090.ENSMUSP00000005077,10090.ENSMUSP00000006467,10090.ENSMUSP00000007207,10090.ENSMUSP00000015481,10090.ENSMUSP00000017576,10090.ENSMUSP00000018727,10090.ENSMUSP00000019906,10090.ENSMUSP00000020640,10090.ENSMUSP00000022638,10090.ENSMUSP00000023509,10090.ENSMUSP00000025875,10090.ENSMUSP00000029266…	Ngfr,Ccl2,Sema4f,Map2k1,Hspb1,Arpc2,Clcn2,Endog,Rbfox3,G3bp1,Vip,Gnb2l1,Nefm,Klhl24,Slc1a1,Anxa5,Serpini1,Adc,Ncdn,Grik3,Cdk5,Rufy3,Npy,Slc2a3,AI118078,Cplx1,Htr5a,Ppp1ca,Map2k4,Kcna2,Kcnk1,Cpe,Kndc1,Kcna1,Pam,Kcnb1,Crh,Pgr,Ptprs,Astn2,Rgs7bp,Adcyap1,Pi4k2a,Sirt2,Bglap3,Drd2,Gria3,Kcnd2,Glul,Nefh,Slc5a7,Scn1b,Slc12a5,Kif5a,Pde11a,Gap43,Ass1,Trpm2,Elavl4,Amigo1,Kcnc3,C9orf72,Brd1,Camk2b,Mapk10,Crm…	4.69e-07	1.01e-05	Perikaryon	32.6923
Process	GO:0051272	151	607	10090	10090.ENSMUSP00000000193,10090.ENSMUSP00000000579,10090.ENSMUSP00000000590,10090.ENSMUSP00000000641,10090.ENSMUSP00000001548,10090.ENSMUSP00000001780,10090.ENSMUSP00000002303,10090.ENSMUSP00000002708,10090.ENSMUSP00000004715,10090.ENSMUSP00000004990,10090.ENSMUSP00000005066,10090.ENSMUSP00000005073,10090.ENSMUSP00000005077,10090.ENSMUSP00000005255,10090.ENSMUSP00000006467,10090.ENSMUSP00000007757…	Ccl2,Sox9,Rdx,Sema4f,Itga3,Akt1,Rhoc,Shh,Mospd2,Mapk14,Map2k1,Zp3,Hspb1,Wisp1,Arpc2,Tgfbr1,Rhoa,Bmp7,Csf1,Cd40,Mmp9,Pfn1,Adora2b,Mcu,Egfr,Gnb2l1,Ccl7,Hif1a,F2rl1,Plk2,Fgf9,Spry2,Angpt1,Bcl6,Adamts1,Nus1,Pla2g7,Cyp1b1,Podxl,Ptp4a1,Ppm1f,Itga6,S100a11,Lef1,Cyr61,Cpne3,Sdcbp,Nr4a3,Epb4.1l4b,Glipr2,Pdpn,Sema3c,Stmn1,Sema3a,Sema3d,Rufy3,Ret,Maz,Pak1,Stx4a,Ilk,Gpr124,Cx3cl1,Cdh5,Mcam,Ctsh,Camk1d,Irs2,J…	4.74e-07	2.53e-05	Positive regulation of cellular component movement	24.8764
Process	GO:1901214	104	375	10090	10090.ENSMUSP00000000122,10090.ENSMUSP00000001319,10090.ENSMUSP00000002487,10090.ENSMUSP00000002708,10090.ENSMUSP00000004327,10090.ENSMUSP00000005798,10090.ENSMUSP00000007130,10090.ENSMUSP00000007959,10090.ENSMUSP00000009550,10090.ENSMUSP00000014743,10090.ENSMUSP00000016400,10090.ENSMUSP00000019516,10090.ENSMUSP00000020243,10090.ENSMUSP00000020640,10090.ENSMUSP00000020692,10090.ENSMUSP00000021530…	Ngfr,Efnb2,Braf,Shh,G6pdx,Snx6,Ctnnb1,Rhoa,Elk1,Csf1,Ctsz,Nrbp2,Ascl1,Gnb2l1,Btg2,Hif1a,Chga,Fos,Clu,Nefl,Fam134b,Angpt1,Sod1,Faim2,Pmaip1,Fas,Prdx3,Rab29,Parp1,Slc7a11,Casp6,Gclm,Nr4a3,Tnfrsf1b,Ppt1,Pink1,Casp9,Cdk5,Nmnat1,Draxin,Tnfrsf1a,Ilk,Nono,Star,Cx3cl1,Egln1,Pin1,Gclc,Six4,Ptprf,Map2k4,Egln3,Cbl,Sncb,Lrp1,Mcl1,Nenf,C1qa,Gpi1,Rilpl1,Fzd9,Cdc42,Sigmar1,Kcnb1,Sorl1,Fzd1,F2r,Grin2b,Ppp1r13b,N…	5.14e-07	2.73e-05	Regulation of neuron death	27.7333
COMPARTMENTS	GOCC:0098839	40	93	10090	10090.ENSMUSP00000001319,10090.ENSMUSP00000002848,10090.ENSMUSP00000005077,10090.ENSMUSP00000019290,10090.ENSMUSP00000020706,10090.ENSMUSP00000023334,10090.ENSMUSP00000025805,10090.ENSMUSP00000027020,10090.ENSMUSP00000036962,10090.ENSMUSP00000037255,10090.ENSMUSP00000039368,10090.ENSMUSP00000044168,10090.ENSMUSP00000046129,10090.ENSMUSP00000046358,10090.ENSMUSP00000048576,10090.ENSMUSP00000050077…	Efnb2,Grin2d,Hspb1,Cacng2,Adcy1,Pvrl3,Cnih2,Gria4,Clstn1,Grm1,Ptprf,Pacsin1,Akap9,Dagla,Grin3b,Oprd1,D3Bwg0562e,Lrrc4b,Abhd17b,Adra2c,Lrrc4,Grin2b,Ptprs,Rgs7bp,Shisa6,Gria3,Ptpro,Scn8a,Cacng3,Slitrk3,Cacng7,Slitrk1,Rtn4,Lrfn1,Dcc,Grin2a,Erbb4,Lrrc4c,Cacng8,Chrm3	5.4e-07	1.98e-05	Postsynaptic density membrane	43.0108
KEGG	mmu04921	53	145	10090	10090.ENSMUSP00000000001,10090.ENSMUSP00000003442,10090.ENSMUSP00000005066,10090.ENSMUSP00000007959,10090.ENSMUSP00000009550,10090.ENSMUSP00000016323,10090.ENSMUSP00000019290,10090.ENSMUSP00000020329,10090.ENSMUSP00000020706,10090.ENSMUSP00000021283,10090.ENSMUSP00000021674,10090.ENSMUSP00000021750,10090.ENSMUSP00000022013,10090.ENSMUSP00000022567,10090.ENSMUSP00000023007,10090.ENSMUSP00000026428…	Gnai3,Cacnb3,Map2k1,Rhoa,Elk1,Camk1g,Cacng2,Egfr,Adcy1,Pik3r5,Fos,Ryr2,Adcy2,Cacna2d3,Adcy8,Myl6b,Nras,Gucy1b3,Npr2,Prkaa2,Prkag2,Cd38,Camk1,Prkab2,Kcnj2,Ppp1ca,Camk4,Mapk3,Ppp3ca,Gnai2,Kcnj9,Rcan1,Pik3cg,Kcnj3,Ppp1r12a,Prkcb,Actg1,Kcnj14,Gnai1,Cacng3,Myl9,Pla2g4e,Cacng7,Prkcg,Actb,Trpm2,Jun,Camk2b,Plcb4,Camkk2,Gucy1a2,Ppp1r12b,Cacng8	5.62e-07	3.73e-05	Oxytocin signaling pathway	36.5517
COMPARTMENTS	GOCC:0099061	34	71	10090	10090.ENSMUSP00000001319,10090.ENSMUSP00000002848,10090.ENSMUSP00000019290,10090.ENSMUSP00000020706,10090.ENSMUSP00000023334,10090.ENSMUSP00000025805,10090.ENSMUSP00000027020,10090.ENSMUSP00000036962,10090.ENSMUSP00000037255,10090.ENSMUSP00000039368,10090.ENSMUSP00000048576,10090.ENSMUSP00000050077,10090.ENSMUSP00000052306,10090.ENSMUSP00000053123,10090.ENSMUSP00000059705,10090.ENSMUSP00000062158…	Efnb2,Grin2d,Cacng2,Adcy1,Pvrl3,Cnih2,Gria4,Clstn1,Grm1,Ptprf,Grin3b,Oprd1,D3Bwg0562e,Lrrc4b,Adra2c,Lrrc4,Grin2b,Ptprs,Shisa6,Gria3,Ptpro,Scn8a,Cacng3,Slitrk3,Cacng7,Slitrk1,Rtn4,Lrfn1,Dcc,Grin2a,Erbb4,Lrrc4c,Cacng8,Chrm3	5.66e-07	2.04e-05	Integral component of postsynaptic density membrane	47.8873
Component	GO:0099061	34	71	10090	10090.ENSMUSP00000001319,10090.ENSMUSP00000002848,10090.ENSMUSP00000019290,10090.ENSMUSP00000020706,10090.ENSMUSP00000023334,10090.ENSMUSP00000025805,10090.ENSMUSP00000027020,10090.ENSMUSP00000036962,10090.ENSMUSP00000037255,10090.ENSMUSP00000039368,10090.ENSMUSP00000048576,10090.ENSMUSP00000050077,10090.ENSMUSP00000052306,10090.ENSMUSP00000053123,10090.ENSMUSP00000059705,10090.ENSMUSP00000062158…	Efnb2,Grin2d,Cacng2,Adcy1,Pvrl3,Cnih2,Gria4,Clstn1,Grm1,Ptprf,Grin3b,Oprd1,D3Bwg0562e,Lrrc4b,Adra2c,Lrrc4,Grin2b,Ptprs,Shisa6,Gria3,Ptpro,Scn8a,Cacng3,Slitrk3,Cacng7,Slitrk1,Rtn4,Lrfn1,Dcc,Grin2a,Erbb4,Lrrc4c,Cacng8,Chrm3	5.66e-07	1.2e-05	Integral component of postsynaptic density membrane	47.8873
COMPARTMENTS	GOCC:0031984	78	255	10090	10090.ENSMUSP00000000895,10090.ENSMUSP00000001479,10090.ENSMUSP00000002029,10090.ENSMUSP00000002063,10090.ENSMUSP00000003117,10090.ENSMUSP00000004968,10090.ENSMUSP00000006027,10090.ENSMUSP00000009219,10090.ENSMUSP00000009234,10090.ENSMUSP00000020350,10090.ENSMUSP00000020420,10090.ENSMUSP00000020537,10090.ENSMUSP00000021001,10090.ENSMUSP00000021201,10090.ENSMUSP00000021285,10090.ENSMUSP00000023064…	Necab3,Kpnb1,Emd,Ap4e1,Ap1m1,Plod3,Reep5,Cabp7,Ap1b1,Lgr5,Ap3d1,Nsg2,Rab10,Cpd,Stx8,Cby1,Osbp,Rab29,Stx6,Yme1l1,Snap25,B4galt1,Adc,Nsg1,Ccdc91,Rtn2,Rab30,Xylt1,Rab6a,Stx4a,Nucb1,Galnt2,Bsn,Scamp5,Reep2,Fam91a1,Nmnat2,March9,Bet1,Akap9,Cnst,Coro7,Tbc1d8,Lamp2,Gcc2,Pam,Golph3,Pigz,Kcnb1,Vps53,Adam10,Rab7b,Pld4,Hook2,Rab31,Slc9a7,Btbd3,Ap3s2,Rac1,Impad1,Caln1,Man2a1,Smc5,Stx16,Cltb,St3gal1,Arfgef2,C…	6.31e-07	2.24e-05	Organelle subcompartment	30.5882
Process	GO:0002009	133	520	10090	10090.ENSMUSP00000000095,10090.ENSMUSP00000000122,10090.ENSMUSP00000000542,10090.ENSMUSP00000000579,10090.ENSMUSP00000001319,10090.ENSMUSP00000001562,10090.ENSMUSP00000002303,10090.ENSMUSP00000002708,10090.ENSMUSP00000004968,10090.ENSMUSP00000005218,10090.ENSMUSP00000005234,10090.ENSMUSP00000007130,10090.ENSMUSP00000007959,10090.ENSMUSP00000009003,10090.ENSMUSP00000009143,10090.ENSMUSP00000014743…	Tbx2,Ngfr,Acvrl1,Sox9,Efnb2,Tulp3,Rhoc,Shh,Plod3,Cd44,Wdr1,Ctnnb1,Rhoa,Rala,Bmp7,Csf1,Lama5,Ctsz,Etv4,Pfn1,Sfrp5,Egfr,Lgr5,Gna13,Rab10,Slc9a3r1,Grb2,Hif1a,Ryr2,Fst,Vcl,Spry2,Angpt1,Vdr,Robo1,Smad4,Podxl,Rdh10,Frzb,Jag1,Lef1,Bcl10,Cyr61,B4galt1,Pdpn,Sema3c,Sema3a,Ret,Lrp6,Pak1,Ilk,Col4a1,Sfrp1,Zdhhc7,Fem1b,Ctsh,Hey1,Ppp1ca,Brsk1,Clic4,Hs2st1,Fras1,Dicer1,Lama1,Prkx,Pcdh8,Fgf1,Mycn,Hoxb4,Gbx2,Greb1…	6.57e-07	3.44e-05	Morphogenesis of an epithelium	25.5769
Component	GO:0005769	98	350	10090	10090.ENSMUSP00000000305,10090.ENSMUSP00000001347,10090.ENSMUSP00000003550,10090.ENSMUSP00000005066,10090.ENSMUSP00000005798,10090.ENSMUSP00000014694,10090.ENSMUSP00000019939,10090.ENSMUSP00000020112,10090.ENSMUSP00000020329,10090.ENSMUSP00000020537,10090.ENSMUSP00000020643,10090.ENSMUSP00000021285,10090.ENSMUSP00000022185,10090.ENSMUSP00000023486,10090.ENSMUSP00000024860,10090.ENSMUSP00000025684…	Tpd52l1,Rnd2,Ncstn,Map2k1,Snx6,Zfyve20,Snx3,Uhrf1bp1l,Egfr,Nsg2,Rufy1,Stx8,F2rl1,Tfrc,Ehd3,Ehd1,Slc1a1,Prdx3,St8sia2,Ptp4a1,Rab29,Stx6,Ehd4,Snx16,Ptpn1,Cd1d1,Rnf11,Ptp4a2,Stx12,Nsg1,Vps33a,Snx8,Ret,Lrp6,Slc17a6,Nucb1,Vps26b,Ldlr,Anxa2,Snx1,Cmtm6,Clvs1,Rep15,Snx2,Washc4,Ptpn23,Parm1,Dner,Lrp1,Siah1a,Arrdc4,Uvrag,Inpp5f,Dagla,Mlc1,Ppp1r21,Mapk3,Mmgt1,Nipa1,Erbb2,Arf6,Gpr107,Vti1b,Olfr78,Rab11fip5,S…	7.59e-07	1.57e-05	Early endosome	28
Component	GO:0099634	54	151	10090	10090.ENSMUSP00000000572,10090.ENSMUSP00000001319,10090.ENSMUSP00000002848,10090.ENSMUSP00000003971,10090.ENSMUSP00000005077,10090.ENSMUSP00000019290,10090.ENSMUSP00000020706,10090.ENSMUSP00000023334,10090.ENSMUSP00000023441,10090.ENSMUSP00000025805,10090.ENSMUSP00000027020,10090.ENSMUSP00000030676,10090.ENSMUSP00000036962,10090.ENSMUSP00000037255,10090.ENSMUSP00000038884,10090.ENSMUSP00000039368…	Gabra2,Efnb2,Grin2d,Lin7b,Hspb1,Cacng2,Adcy1,Pvrl3,P2rx6,Cnih2,Gria4,Grik3,Clstn1,Grm1,Htr5a,Ptprf,Pacsin1,Akap9,Dagla,Grin3b,Oprd1,D3Bwg0562e,Lrrc4b,Sigmar1,Abhd17b,Adra2c,Lrrc4,Grin2b,Gabrg2,Ptprs,Nlgn3,Rgs7bp,Shisa6,Nptx2,Gria3,Ptpro,Kcnd2,Scn8a,Cacng3,Slitrk3,Cacng7,Slitrk1,Rtn4,Lrfn1,Grik4,Dcc,Grin2a,Abhd17c,Erbb4,Prrt2,Lrrtm1,Lrrc4c,Cacng8,Chrm3	7.65e-07	1.57e-05	Postsynaptic specialization membrane	35.7616
Process	GO:0043269	172	722	10090	10090.ENSMUSP00000000109,10090.ENSMUSP00000000186,10090.ENSMUSP00000000193,10090.ENSMUSP00000000201,10090.ENSMUSP00000001115,10090.ENSMUSP00000001780,10090.ENSMUSP00000001963,10090.ENSMUSP00000002572,10090.ENSMUSP00000003442,10090.ENSMUSP00000003717,10090.ENSMUSP00000004137,10090.ENSMUSP00000004327,10090.ENSMUSP00000005234,10090.ENSMUSP00000007130,10090.ENSMUSP00000007207,10090.ENSMUSP00000007257…	Cntn1,Fgf23,Ccl2,Nalcn,Grk6,Akt1,Ace,Slc9a3r2,Cacnb3,Abcb4,Gstm7,G6pdx,Wdr1,Ctnnb1,Clcn2,Clic1,Rhoa,Kcnd1,Nol3,Mmp9,Kcnab3,Trpv2,Cacng2,Vip,Atp2b1,Avpr1a,Tspan13,Map2k6,Slc9a3r1,Slc6a4,Arg2,Ryr2,Cacna2d3,Dpysl2,Jph4,Vdr,Klhl24,Ehd3,Syt4,Gabbr1,Cnih2,Gal,Kcnk4,Jph3,Iscu,Tnfrsf11a,Stom,Pink1,Slc9a1,Cdk5,Tesc,Acsl4,Tmem66,Cx3cl1,Tmem38a,Stoml1,Rasgrf1,Atp1b3,Stac,Fam115a,Sln,Tspo,Kcnj2,Irs2,Atp1a1,C…	8.08e-07	4.22e-05	Regulation of ion transport	23.8227
NetworkNeighborAL	CL:18325	51	139	10090	10090.ENSMUSP00000000109,10090.ENSMUSP00000002848,10090.ENSMUSP00000019290,10090.ENSMUSP00000025805,10090.ENSMUSP00000027020,10090.ENSMUSP00000030637,10090.ENSMUSP00000030676,10090.ENSMUSP00000033915,10090.ENSMUSP00000034076,10090.ENSMUSP00000034912,10090.ENSMUSP00000048576,10090.ENSMUSP00000053558,10090.ENSMUSP00000056080,10090.ENSMUSP00000062158,10090.ENSMUSP00000062284,10090.ENSMUSP00000063933…	Cntn1,Grin2d,Cacng2,Cnih2,Gria4,Ncdn,Grik3,Gpm6a,Cbln1,Rasgrf1,Grin3b,Abhd12,Gldn,Lrrc4,Grin2b,Chl1,Nlgn3,Shisa6,Negr1,Ntm,Gria3,Tspan7,Porcn,Lsamp,Homer1,Syngap1,Cacng3,Cntn2,Cntn6,Slitrk3,Ank3,Rasgrf2,Prkcg,Epb4.1l1,L1cam,Shank1,Iglon5,Lrfn1,Cntnap2,Grik4,Opcml,Grin2a,Ank1,Igsf9b,Lhfpl4,Lrrtm1,Mdga1,Abhd6,Ncam1,Lrrc4c,Cacng8	8.31e-07	0.002	Mixed, incl. neurotransmitter receptor complex, and neurexins and neuroligins	36.6906
Process	GO:0007420	179	759	10090	10090.ENSMUSP00000000001,10090.ENSMUSP00000000109,10090.ENSMUSP00000000127,10090.ENSMUSP00000001562,10090.ENSMUSP00000002305,10090.ENSMUSP00000002708,10090.ENSMUSP00000003320,10090.ENSMUSP00000003550,10090.ENSMUSP00000004326,10090.ENSMUSP00000004964,10090.ENSMUSP00000005066,10090.ENSMUSP00000006181,10090.ENSMUSP00000006828,10090.ENSMUSP00000007130,10090.ENSMUSP00000007959,10090.ENSMUSP00000009143…	Gnai3,Cntn1,Wnt3,Tulp3,Kdm7a,Shh,Eif2b5,Ncstn,Plxna3,Pou1f1,Map2k1,Napa,Aplp1,Ctnnb1,Rhoa,Bmp7,Top2b,Ndel1,Hdac2,Atp2b1,Ascl1,Avpr1a,Egfr,Btg2,Adcy1,Slc6a4,Hif1a,Agtpbp1,Glud1,Dpysl2,Nefl,Klhl1,Cln5,Bcl2l2,Sharpin,Robo1,Faim2,Syt4,Pfdn1,Bag6,Slit1,Hprt,Abcb6,Xrn2,Cst3,Snph,Slc7a11,Smad9,Wnt2b,Lef1,Ptbp2,Nr4a3,Ssbp3,Slc2a1,Ppt1,Tmem57,Stmn1,Sema3a,Cdk5,Draxin,Npy,Mtpn,Lrp6,Cd9,Nr2f2,Pak1,Fgf13,Col…	8.36e-07	4.35e-05	Brain development	23.5837
Process	GO:2000147	146	589	10090	10090.ENSMUSP00000000193,10090.ENSMUSP00000000579,10090.ENSMUSP00000000590,10090.ENSMUSP00000000641,10090.ENSMUSP00000001548,10090.ENSMUSP00000001780,10090.ENSMUSP00000002303,10090.ENSMUSP00000002708,10090.ENSMUSP00000004715,10090.ENSMUSP00000004990,10090.ENSMUSP00000005066,10090.ENSMUSP00000005073,10090.ENSMUSP00000005077,10090.ENSMUSP00000005255,10090.ENSMUSP00000006467,10090.ENSMUSP00000007757…	Ccl2,Sox9,Rdx,Sema4f,Itga3,Akt1,Rhoc,Shh,Mospd2,Mapk14,Map2k1,Zp3,Hspb1,Wisp1,Arpc2,Tgfbr1,Rhoa,Bmp7,Csf1,Cd40,Mmp9,Pfn1,Adora2b,Mcu,Egfr,Gnb2l1,Ccl7,Hif1a,F2rl1,Plk2,Fgf9,Spry2,Angpt1,Adamts1,Nus1,Pla2g7,Cyp1b1,Podxl,Ptp4a1,Ppm1f,Itga6,S100a11,Lef1,Cyr61,Cpne3,Sdcbp,Nr4a3,Epb4.1l4b,Glipr2,Pdpn,Sema3c,Sema3a,Sema3d,Rufy3,Ret,Maz,Pak1,Stx4a,Ilk,Gpr124,Cx3cl1,Cdh5,Mcam,Ctsh,Camk1d,Irs2,Jcad,Fam110c…	8.67e-07	4.49e-05	Positive regulation of cell motility	24.7878
COMPARTMENTS	GOCC:0010008	71	226	10090	10090.ENSMUSP00000004173,10090.ENSMUSP00000005256,10090.ENSMUSP00000005798,10090.ENSMUSP00000017783,10090.ENSMUSP00000019939,10090.ENSMUSP00000020329,10090.ENSMUSP00000020420,10090.ENSMUSP00000020537,10090.ENSMUSP00000020643,10090.ENSMUSP00000020909,10090.ENSMUSP00000021285,10090.ENSMUSP00000022197,10090.ENSMUSP00000023486,10090.ENSMUSP00000024860,10090.ENSMUSP00000025276,10090.ENSMUSP00000025646…	Cdip1,Ndrg1,Snx6,Rab11fip4,Snx3,Egfr,Ap3d1,Nsg2,Rufy1,Laptm4a,Stx8,Scamp1,Tfrc,Ehd3,Mic1,Slc15a3,Ehd1,Slc1a1,Ifitm3,Abcb6,Ehd4,Sppl2a,Snx16,Lamtor2,Nsg1,Rab35,Snx8,Atp6ap2,Mvb12a,Ldlr,Anxa2,Snx1,Cmtm6,Scamp5,Zdhhc1,Rragb,Snx2,Fig4,Zdhhc2,Micall1,Neu3,Abca3,Dagla,Slc38a9,Lamp2,Erbb2,Arf6,Abhd17b,Vti1b,Olfr78,Pi4k2a,Slc9a7,Vps41,Mon2,Myo5b,Vps37d,Osbpl6,Rac1,Pla2g4e,Rraga,Shc1,Vps4b,Snap91,Ehd2,Atp…	8.91e-07	3.11e-05	Endosome membrane	31.4159
Process	GO:1903530	170	713	10090	10090.ENSMUSP00000000186,10090.ENSMUSP00000000199,10090.ENSMUSP00000000299,10090.ENSMUSP00000001507,10090.ENSMUSP00000002320,10090.ENSMUSP00000002487,10090.ENSMUSP00000005073,10090.ENSMUSP00000005255,10090.ENSMUSP00000005509,10090.ENSMUSP00000006181,10090.ENSMUSP00000009003,10090.ENSMUSP00000009157,10090.ENSMUSP00000017590,10090.ENSMUSP00000017799,10090.ENSMUSP00000018644,10090.ENSMUSP00000019231…	Fgf23,Ncs1,Itgb2,Cyp51,Ppard,Braf,Zp3,Wisp1,Stx1a,Napa,Rala,Dynll1,C1qtnf1,Cd40,Adora2b,Atp6ap1,Gipc1,Vip,Mcu,Avpr1a,Egfr,Pfkl,Igfbp3,Adcy1,Srebf1,Sdc1,Map2k6,Rsad2,Rab10,Slc6a4,Rab15,Hif1a,Chga,Hmgcr,F2rl1,Glud1,Rgcc,Dpysl2,Adcy8,Asic1,Slc4a8,Abcg1,Syt4,Gabbr1,Smad4,Ankrd1,Apba1,Cpt1a,Gal,Casp1,Ecrg4,Tnfrsf11a,Acvr1c,Snap25,Napb,Anxa5,Ppid,Serp1,Sdcbp,Tnfrsf1b,Pink1,Cdk5,Cd38,Aacs,Tnfrsf1a,Il4ra…	8.95e-07	4.62e-05	Regulation of secretion by cell	23.8429
Process	GO:0006897	108	400	10090	10090.ENSMUSP00000000058,10090.ENSMUSP00000000299,10090.ENSMUSP00000000939,10090.ENSMUSP00000002063,10090.ENSMUSP00000002708,10090.ENSMUSP00000003038,10090.ENSMUSP00000005509,10090.ENSMUSP00000006828,10090.ENSMUSP00000016672,10090.ENSMUSP00000016771,10090.ENSMUSP00000019290,10090.ENSMUSP00000019931,10090.ENSMUSP00000020643,10090.ENSMUSP00000021090,10090.ENSMUSP00000021685,10090.ENSMUSP00000022197…	Cav2,Itgb2,Hip1r,Ap4e1,Shh,Ap2a2,Stx1a,Aplp1,Mapkapk2,Myh9,Cacng2,Lrp11,Rufy1,Grb2,Hhipl1,Scamp1,Dpysl2,Loxl2,Tfrc,Ache,Ehd3,Rhoq,Ehd1,Ifitm3,Gsn,Snap25,Ehd4,Napb,Prss12,Abca1,Ppt1,Cdk5,Scarb2,Wasl,Olr1,Lrp6,Necap1,Cd9,Fchsd2,Ldlr,Snx1,Gak,Snx2,Arhgap27,Xkr8,Rhov,Micall1,Sncb,Cd81,Lrp1,Pacsin1,Thbs1,Inpp5f,Wipf2,Mlc1,Mapk3,Sh3bp1,Ldlrad3,Cdc42,Arf6,Cd14,Gpr107,Sorl1,Rhoj,Mtmr9,Pik3cg,Ezr,Dnm3,Mia…	9.11e-07	4.68e-05	Endocytosis	27
Process	GO:0040017	149	605	10090	10090.ENSMUSP00000000193,10090.ENSMUSP00000000579,10090.ENSMUSP00000000590,10090.ENSMUSP00000000641,10090.ENSMUSP00000001548,10090.ENSMUSP00000001780,10090.ENSMUSP00000002303,10090.ENSMUSP00000002708,10090.ENSMUSP00000004715,10090.ENSMUSP00000004990,10090.ENSMUSP00000005066,10090.ENSMUSP00000005073,10090.ENSMUSP00000005077,10090.ENSMUSP00000005255,10090.ENSMUSP00000006467,10090.ENSMUSP00000007757…	Ccl2,Sox9,Rdx,Sema4f,Itga3,Akt1,Rhoc,Shh,Mospd2,Mapk14,Map2k1,Zp3,Hspb1,Wisp1,Arpc2,Tgfbr1,Rhoa,Bmp7,Csf1,Cd40,Mmp9,Pfn1,Adora2b,Mcu,Egfr,Gnb2l1,Ccl7,Hif1a,F2rl1,Plk2,Fgf9,Spry2,Angpt1,Adamts1,Nus1,Pla2g7,Cyp1b1,Podxl,Ptp4a1,Ppm1f,Itga6,S100a11,Lef1,Cyr61,Cpne3,Sdcbp,Nr4a3,Epb4.1l4b,Glipr2,Pdpn,Sema3c,Sema3a,Sema3d,Rufy3,Ret,Maz,Pak1,Stx4a,Ilk,Gpr124,Cx3cl1,Cdh5,Mcam,Ctsh,Camk1d,Irs2,Jcad,Fam110c…	9.17e-07	4.69e-05	Positive regulation of locomotion	24.6281
Keyword	KW-0444	57	165	10090	10090.ENSMUSP00000001507,10090.ENSMUSP00000004381,10090.ENSMUSP00000005003,10090.ENSMUSP00000006557,10090.ENSMUSP00000006692,10090.ENSMUSP00000010807,10090.ENSMUSP00000015858,10090.ENSMUSP00000021990,10090.ENSMUSP00000022176,10090.ENSMUSP00000023762,10090.ENSMUSP00000024594,10090.ENSMUSP00000025567,10090.ENSMUSP00000025713,10090.ENSMUSP00000026129,10090.ENSMUSP00000026220,10090.ENSMUSP00000026221…	Cyp51,Lpcat3,Lbr,Elovl1,Mvd,Fads1,Cers2,Ptdss1,Hmgcr,Cers5,Agpat4,Fads2,Tm7sf2,Pcyt2,Scd3,Scd2,Cyp27a1,Agpat2,Lpcat4,Hsd17b12,Crls1,Ugcg,Prkaa2,Prkag2,Cds1,St8sia1,Dgat2,Ebp,Nsdhl,Msmo1,Prkab2,Scd1,Dhcr24,Agps,Thrsp,Pcyt1b,Lss,Serinc5,Ptges3,Sc5d,Fads6,B4galt6,Lclat1,Fam57b,Cds2,Acacb,Agpat3,B4galt5,Lpgat1,Far2,Mid1ip1,Fads3,Ept1,Pgs1,Abhd5,A4galt,Hmgcs1	9.44e-07	2.57e-05	Lipid biosynthesis	34.5455
NetworkNeighborAL	CL:18323	63	191	10090	10090.ENSMUSP00000000109,10090.ENSMUSP00000002848,10090.ENSMUSP00000006828,10090.ENSMUSP00000019290,10090.ENSMUSP00000022629,10090.ENSMUSP00000025379,10090.ENSMUSP00000025805,10090.ENSMUSP00000027020,10090.ENSMUSP00000030637,10090.ENSMUSP00000030676,10090.ENSMUSP00000030814,10090.ENSMUSP00000030986,10090.ENSMUSP00000033915,10090.ENSMUSP00000034076,10090.ENSMUSP00000034912,10090.ENSMUSP00000043074…	Cntn1,Grin2d,Aplp1,Cacng2,Dpysl2,Dpysl3,Cnih2,Gria4,Ncdn,Grik3,Cdk5,Lrpap1,Gpm6a,Cbln1,Rasgrf1,Sncb,Cnst,Grin3b,Abhd12,Gldn,Sorl1,Lrrc4,Grin2b,Chl1,Nlgn3,Shisa6,Negr1,Ntm,Gria3,Tspan7,Porcn,Lsamp,Homer1,Syngap1,Cacng3,Cntn2,Dpysl5,Cntn6,Slitrk3,Ank3,Rasgrf2,Prkcg,Epb4.1l1,L1cam,Dab1,Shank1,Iglon5,Lrfn1,Crmp1,Cntnap2,Grik4,Opcml,Grin2a,Ank1,Igsf9b,Lhfpl4,Lrrtm1,Mdga1,Rem2,Abhd6,Ncam1,Lrrc4c,Cacng8	9.52e-07	0.002	Mixed, incl. neurotransmitter receptor complex, and synapse organization	32.9843
WikiPathways	WP447	49	132	10090	10090.ENSMUSP00000000080,10090.ENSMUSP00000000466,10090.ENSMUSP00000002320,10090.ENSMUSP00000005279,10090.ENSMUSP00000007130,10090.ENSMUSP00000015987,10090.ENSMUSP00000020846,10090.ENSMUSP00000020886,10090.ENSMUSP00000021530,10090.ENSMUSP00000022693,10090.ENSMUSP00000022701,10090.ENSMUSP00000025691,10090.ENSMUSP00000025946,10090.ENSMUSP00000028286,10090.ENSMUSP00000028389,10090.ENSMUSP00000029699…	Klf6,Plin2,Ppard,Klf5,Ctnnb1,Rxrg,Srebf1,Nampt,Hif1a,Bmp1,Rb1,Fas,Cyp26a1,Agpat2,Frzb,Lmna,Nsg1,Rbl2,Scd1,Irs2,Pck2,Egr2,Trib3,Gadd45a,Ndn,Nrip1,Zmpste24,Fzd1,Socs3,Celf1,Lpin1,Cyp26b1,Nr2f1,Cntfr,Gata3,Stat2,Ppara,Dlk1,Klf7,Ahr,Ppargc1a,Mef2a,Stat3,Prlr,Tle3,Lifr,Bscl2,Il6st,Spock1	1.03e-06	5.11e-05	Adipogenesis genes	37.1212
Process	GO:0001655	98	353	10090	10090.ENSMUSP00000000579,10090.ENSMUSP00000001319,10090.ENSMUSP00000001548,10090.ENSMUSP00000001963,10090.ENSMUSP00000002284,10090.ENSMUSP00000002708,10090.ENSMUSP00000005218,10090.ENSMUSP00000005532,10090.ENSMUSP00000007130,10090.ENSMUSP00000007757,10090.ENSMUSP00000009143,10090.ENSMUSP00000010278,10090.ENSMUSP00000014447,10090.ENSMUSP00000015791,10090.ENSMUSP00000020350,10090.ENSMUSP00000020911…	Sox9,Efnb2,Itga3,Ace,Plaur,Shh,Cd44,Nid1,Ctnnb1,Tgfbr1,Bmp7,Wdr77,Glis2,Lama5,Lgr5,Sdc1,Arg2,Angpt1,Adamts1,Bag6,Smad4,Podxl,Smad7,Rdh10,Cat,Jag1,Smad9,Calb1,Casp9,Mmp17,Sec61a1,Ret,Fkbp4,Ilk,Col4a1,Sfrp1,Hpgd,Acat1,Fem1b,Ctsh,Six4,Hey1,Foxj1,Hs2st1,Amh,Fras1,Pygo1,Prkx,Fgf1,Tiparp,Acta2,Greb1l,Dact2,Pou3f3,Ar,Zmpste24,Basp1,Nup160,Nog,Fat4,Has2,Nup107,Smad1,Nf1,Nfia,Ptpro,Cyp26b1,Sox11,Notch2,Mt…	1.04e-06	5.26e-05	Urogenital system development	27.762
COMPARTMENTS	GOCC:0098948	43	108	10090	10090.ENSMUSP00000000572,10090.ENSMUSP00000001319,10090.ENSMUSP00000002848,10090.ENSMUSP00000019290,10090.ENSMUSP00000020706,10090.ENSMUSP00000023334,10090.ENSMUSP00000023441,10090.ENSMUSP00000025805,10090.ENSMUSP00000027020,10090.ENSMUSP00000036962,10090.ENSMUSP00000037255,10090.ENSMUSP00000038884,10090.ENSMUSP00000039368,10090.ENSMUSP00000048576,10090.ENSMUSP00000050077,10090.ENSMUSP00000052306…	Gabra2,Efnb2,Grin2d,Cacng2,Adcy1,Pvrl3,P2rx6,Cnih2,Gria4,Clstn1,Grm1,Htr5a,Ptprf,Grin3b,Oprd1,D3Bwg0562e,Lrrc4b,Abhd17b,Adra2c,Lrrc4,Grin2b,Gabrg2,Ptprs,Nlgn3,Rgs7bp,Shisa6,Gria3,Ptpro,Kcnd2,Scn8a,Cacng3,Slitrk3,Cacng7,Slitrk1,Rtn4,Lrfn1,Dcc,Grin2a,Erbb4,Lrrtm1,Lrrc4c,Cacng8,Chrm3	1.08e-06	3.7e-05	Intrinsic component of postsynaptic specialization membrane	39.8148
Component	GO:0098948	43	108	10090	10090.ENSMUSP00000000572,10090.ENSMUSP00000001319,10090.ENSMUSP00000002848,10090.ENSMUSP00000019290,10090.ENSMUSP00000020706,10090.ENSMUSP00000023334,10090.ENSMUSP00000023441,10090.ENSMUSP00000025805,10090.ENSMUSP00000027020,10090.ENSMUSP00000036962,10090.ENSMUSP00000037255,10090.ENSMUSP00000038884,10090.ENSMUSP00000039368,10090.ENSMUSP00000048576,10090.ENSMUSP00000050077,10090.ENSMUSP00000052306…	Gabra2,Efnb2,Grin2d,Cacng2,Adcy1,Pvrl3,P2rx6,Cnih2,Gria4,Clstn1,Grm1,Htr5a,Ptprf,Grin3b,Oprd1,D3Bwg0562e,Lrrc4b,Abhd17b,Adra2c,Lrrc4,Grin2b,Gabrg2,Ptprs,Nlgn3,Rgs7bp,Shisa6,Gria3,Ptpro,Kcnd2,Scn8a,Cacng3,Slitrk3,Cacng7,Slitrk1,Rtn4,Lrfn1,Dcc,Grin2a,Erbb4,Lrrtm1,Lrrc4c,Cacng8,Chrm3	1.08e-06	2.15e-05	Intrinsic component of postsynaptic specialization membrane	39.8148
NetworkNeighborAL	CL:24693	33	70	10090	10090.ENSMUSP00000001507,10090.ENSMUSP00000005003,10090.ENSMUSP00000006557,10090.ENSMUSP00000006692,10090.ENSMUSP00000010807,10090.ENSMUSP00000019333,10090.ENSMUSP00000020846,10090.ENSMUSP00000021684,10090.ENSMUSP00000022176,10090.ENSMUSP00000022977,10090.ENSMUSP00000024829,10090.ENSMUSP00000025567,10090.ENSMUSP00000025713,10090.ENSMUSP00000026220,10090.ENSMUSP00000026221,10090.ENSMUSP00000027356…	Cyp51,Lbr,Elovl1,Mvd,Fads1,Rnf145,Srebf1,Cyp46a1,Hmgcr,Sqle,Abcg1,Fads2,Tm7sf2,Scd3,Scd2,Cyp27a1,Hsd17b12,Ebp,Nsdhl,Msmo1,Ldlr,Scd1,Dhcr24,Lss,Mylip,Sigmar1,Sc5d,Mbtps2,Insig1,Fads3,Ggps1,Hmgcs1,Soat1	1.08e-06	0.002	Cholesterol metabolism with Bloch and Kandutsch-Russell pathways, and very long-chain fatty acid biosynthetic process	47.1429
Process	GO:0044057	148	602	10090	10090.ENSMUSP00000000095,10090.ENSMUSP00000000122,10090.ENSMUSP00000000939,10090.ENSMUSP00000001592,10090.ENSMUSP00000001780,10090.ENSMUSP00000001963,10090.ENSMUSP00000002100,10090.ENSMUSP00000002848,10090.ENSMUSP00000003442,10090.ENSMUSP00000004327,10090.ENSMUSP00000005066,10090.ENSMUSP00000005255,10090.ENSMUSP00000005509,10090.ENSMUSP00000007005,10090.ENSMUSP00000007959,10090.ENSMUSP00000014920…	Tbx2,Ngfr,Hip1r,Jup,Akt1,Ace,Tmem25,Grin2d,Cacnb3,G6pdx,Map2k1,Wisp1,Stx1a,Acat2,Rhoa,Nol3,Gtf2ird2,Wasf3,C1qtnf1,Adora2b,Slc22a5,Cacng2,Vip,Atp2b1,Ctgf,Avpr1a,Egfr,Srebf1,Slc9a3r1,Hif1a,Arg2,Chga,Ryr2,F2rl1,Twf1,Cxadr,Sod1,Tnfrsf21,Ehd3,Smad4,Cnih2,Gal,Slc1a1,Nptx1,Smad7,Ecrg4,Parp1,Fabp5,Lmna,Nr4a3,Tnfrsf1b,Slc9a1,Sema3a,Cd38,Abcg2,Mtpn,Tnfrsf1a,Pak1,Cckbr,Fgf13,Cbln1,Cx3cl1,Tmem38a,Pin1,Sln,Kc…	1.08e-06	5.46e-05	Regulation of system process	24.5847
Process	GO:0080135	165	690	10090	10090.ENSMUSP00000000305,10090.ENSMUSP00000001652,10090.ENSMUSP00000001780,10090.ENSMUSP00000001825,10090.ENSMUSP00000002487,10090.ENSMUSP00000005066,10090.ENSMUSP00000005077,10090.ENSMUSP00000005218,10090.ENSMUSP00000006137,10090.ENSMUSP00000007130,10090.ENSMUSP00000008748,10090.ENSMUSP00000010298,10090.ENSMUSP00000014920,10090.ENSMUSP00000015481,10090.ENSMUSP00000015858,10090.ENSMUSP00000016680…	Tpd52l1,Bdkrb2,Akt1,Chordc1,Braf,Map2k1,Hspb1,Cd44,Trap1,Ctnnb1,Ubqln4,Spire2,Nol3,Endog,Cers2,Cul4a,Top2b,Serinc3,Ndel1,Fxr2,Sfrp5,Ctgf,Nuak1,Egfr,Gnb2l1,Kremen1,Nampt,Ddx5,Hif1a,Arg2,Wrnip1,Gadd45g,Hmgcr,F2rl1,Plk2,Dhfr,Clu,Adcy8,Bcl6,Sod1,Xdh,Eif2ak2,Bag6,Impact,Pmaip1,Otub1,Fas,Ankrd1,Map4k2,P4hb,Cops5,Tnfrsf11a,Parp1,Fh1,Atf6,Spred1,Ptpn1,Slc7a11,Ddah1,Nr4a3,Txn1,Txndc12,Pink1,Casp9,Ybx3,Ltb…	1.11e-06	5.59e-05	Regulation of cellular response to stress	23.913
COMPARTMENTS	GOCC:0005802	56	162	10090	10090.ENSMUSP00000002063,10090.ENSMUSP00000003117,10090.ENSMUSP00000004968,10090.ENSMUSP00000009219,10090.ENSMUSP00000009234,10090.ENSMUSP00000020350,10090.ENSMUSP00000020420,10090.ENSMUSP00000020537,10090.ENSMUSP00000021001,10090.ENSMUSP00000021201,10090.ENSMUSP00000021285,10090.ENSMUSP00000023064,10090.ENSMUSP00000025590,10090.ENSMUSP00000027693,10090.ENSMUSP00000027743,10090.ENSMUSP00000028727…	Ap4e1,Ap1m1,Plod3,Cabp7,Ap1b1,Lgr5,Ap3d1,Nsg2,Rab10,Cpd,Stx8,Cby1,Osbp,Rab29,Stx6,Snap25,Adc,Nsg1,Ccdc91,Rab30,Rab6a,Stx4a,Nucb1,Bsn,Scamp5,Fam91a1,Nmnat2,March9,Cnst,Coro7,Lamp2,Gcc2,Pam,Golph3,Vps53,Adam10,Rab7b,Pld4,Hook2,Rab31,Slc9a7,Ap3s2,Rac1,Impad1,Caln1,Stx16,Cltb,St3gal1,Arfgef2,Car4,Lrba,Atp9a,Klhl20,Plekha8,Ift88,Golph3l	1.15e-06	3.89e-05	trans-Golgi network	34.5679
Process	GO:0072657	113	427	10090	10090.ENSMUSP00000000299,10090.ENSMUSP00000000590,10090.ENSMUSP00000001592,10090.ENSMUSP00000002487,10090.ENSMUSP00000003442,10090.ENSMUSP00000003971,10090.ENSMUSP00000005509,10090.ENSMUSP00000015791,10090.ENSMUSP00000019290,10090.ENSMUSP00000020420,10090.ENSMUSP00000021001,10090.ENSMUSP00000021077,10090.ENSMUSP00000021407,10090.ENSMUSP00000021459,10090.ENSMUSP00000021684,10090.ENSMUSP00000023071…	Itgb2,Rdx,Jup,Braf,Cacnb3,Lin7b,Stx1a,Lama5,Cacng2,Ap3d1,Rab10,Slc9a3r1,Srp54a,Rab15,Cyp46a1,Samm50,Pvrl3,Ehd3,Bag6,Ehd1,Pacs1,Chm,Nptx1,Rab29,Snap25,Ehd4,Sec62,Ssr3,Glrb,Zdhhc21,Cdk5,Fam126a,Nsg1,Tesc,Sec61a1,Lrp6,Tnfrsf1a,Pak1,Stx4a,Fgf13,Zdhhc7,Srpr,Anxa2,Atp1b3,Reep2,Zdhhc1,Gak,S100a10,Clstn1,Cplx1,Zdhhc2,Micall1,Cd81,Pacsin1,Sh3pxd2b,Zdhhc9,Tspan33,Tspan15,Cpe,Grin3b,Nacad,Gpr158,Rilpl1,Golp…	1.16e-06	5.81e-05	Protein localization to membrane	26.4637
KEGG	mmu05206	55	158	10090	10090.ENSMUSP00000000127,10090.ENSMUSP00000000590,10090.ENSMUSP00000004202,10090.ENSMUSP00000005066,10090.ENSMUSP00000005218,10090.ENSMUSP00000007959,10090.ENSMUSP00000017881,10090.ENSMUSP00000019911,10090.ENSMUSP00000020234,10090.ENSMUSP00000020329,10090.ENSMUSP00000020576,10090.ENSMUSP00000021090,10090.ENSMUSP00000022709,10090.ENSMUSP00000022806,10090.ENSMUSP00000024811,10090.ENSMUSP00000024894…	Wnt3,Rdx,Dnmt1,Map2k1,Cd44,Rhoa,Mmp9,Hdac2,Timp3,Egfr,Ccng1,Grb2,Spry2,Bcl2l2,Pim1,Cyp1b1,Vim,Nras,Efna3,Mmp16,Stmn1,Fscn1,Irs2,Hnrnpk,Rps6ka5,Dicer1,Mcl1,Thbs1,Slc7a1,Gls2,Cyp24a1,Zfpm2,Mapk3,Erbb2,Pik3r1,Ezr,Ep300,Sos1,Prkcb,Efna5,Notch2,Serpinb5,Notch3,Marcks,Casp3,Shc1,Prkce,Prkcg,Plcg1,Tnr,Bcl2,Gls,Met,Stat3,Cdk6	1.2e-06	6.64e-05	MicroRNAs in cancer	34.8101
Process	GO:0034765	123	477	10090	10090.ENSMUSP00000000193,10090.ENSMUSP00000000201,10090.ENSMUSP00000001115,10090.ENSMUSP00000001780,10090.ENSMUSP00000002572,10090.ENSMUSP00000003442,10090.ENSMUSP00000004137,10090.ENSMUSP00000004327,10090.ENSMUSP00000005234,10090.ENSMUSP00000007207,10090.ENSMUSP00000007257,10090.ENSMUSP00000009875,10090.ENSMUSP00000014920,10090.ENSMUSP00000017881,10090.ENSMUSP00000018614,10090.ENSMUSP00000019290…	Ccl2,Nalcn,Grk6,Akt1,Slc9a3r2,Cacnb3,Gstm7,G6pdx,Wdr1,Clcn2,Clic1,Kcnd1,Nol3,Mmp9,Kcnab3,Cacng2,Tspan13,Slc9a3r1,Ryr2,Cacna2d3,Klhl24,Ehd3,Cnih2,Gal,Kcnk4,Jph3,Iscu,Stom,Pink1,Slc9a1,Cdk5,Tesc,Cx3cl1,Tmem38a,Stoml1,Rasgrf1,Atp1b3,Stac,Fam115a,Sln,Kcnj2,Irs2,Clic4,Arl6ip5,Kcna2,Oxsr1,Thbs1,Akap9,Acsl5,Kcnh5,Kcnh2,Zmpste24,Kcna1,Kcng4,Kcnb1,Sepn1,Kcnj9,Kcns3,Crh,F2r,Scn4b,Pik3cg,Cemip,Kcnj3,Kcnq3,N…	1.21e-06	6.02e-05	Regulation of ion transmembrane transport	25.7862
COMPARTMENTS	GOCC:0070161	130	512	10090	10090.ENSMUSP00000000122,10090.ENSMUSP00000000590,10090.ENSMUSP00000001592,10090.ENSMUSP00000001780,10090.ENSMUSP00000002889,10090.ENSMUSP00000003451,10090.ENSMUSP00000003717,10090.ENSMUSP00000003754,10090.ENSMUSP00000003971,10090.ENSMUSP00000005066,10090.ENSMUSP00000005234,10090.ENSMUSP00000005256,10090.ENSMUSP00000006467,10090.ENSMUSP00000007130,10090.ENSMUSP00000007757,10090.ENSMUSP00000007959…	Ngfr,Rdx,Jup,Akt1,Flii,Rnd1,Abcb4,Calb2,Lin7b,Map2k1,Wdr1,Ndrg1,Arpc2,Ctnnb1,Tgfbr1,Rhoa,Rala,Limk1,Myh9,Grb2,Slc6a4,Vcl,Pvrl3,Pak2,Klhl24,Cxadr,Limd1,Podxl,Rsu1,Fam129b,Itga6,Jag1,Mapre1,Anxa5,Cpne3,B4galt1,Tln1,Slc2a1,Slc9a1,Fscn1,Ybx3,Pak1,Ilk,Fgf13,Tnfsf13b,Cdh5,Pvrl1,Clmp,Lpp,Kcnj2,Cib2,Jcad,Ppp1ca,Kirrel2,Atp1a1,Micall2,Kcna2,Asap3,Cbl,Polr2l,Sgsm3,Lama1,Senp1,Mlc1,Mapk3,Sh3bp1,Frmd6,Pard6b…	1.21e-06	4.02e-05	Anchoring junction	25.3906
Process	GO:0043066	207	913	10090	10090.ENSMUSP00000000001,10090.ENSMUSP00000000122,10090.ENSMUSP00000000579,10090.ENSMUSP00000000939,10090.ENSMUSP00000001652,10090.ENSMUSP00000001780,10090.ENSMUSP00000002284,10090.ENSMUSP00000002320,10090.ENSMUSP00000002487,10090.ENSMUSP00000002708,10090.ENSMUSP00000003313,10090.ENSMUSP00000004202,10090.ENSMUSP00000005066,10090.ENSMUSP00000005077,10090.ENSMUSP00000005218,10090.ENSMUSP00000005647…	Gnai3,Ngfr,Sox9,Hip1r,Bdkrb2,Akt1,Plaur,Ppard,Braf,Shh,Grk5,Dnmt1,Map2k1,Hspb1,Cd44,Ndufs3,Por,Snx6,Trap1,Ctnnb1,Tgfbr1,Rhoa,Bmp7,Timp1,Pea15a,Nol3,Fnta,Mmp9,Nrbp2,D17Wsu104e,Vip,Hdac2,Ascl1,Egfr,Ccng1,Btg2,Nme2,Hif1a,Arg2,Naa35,Hmgcr,Plk2,Vdac2,Clu,Nefl,Rb1,Spry2,Bcl2l2,Fam134b,Angpt1,Bcl6,Mpv17l,Rrn3,Pak2,Tfrc,Sod1,Faim2,Ivns1abp,Pim1,Glo1,Eif2ak2,Bag6,Fas,Peli3,Rela,Prdx3,Cops5,Cln8,Lhx4,Yme1l…	1.24e-06	6.14e-05	Negative regulation of apoptotic process	22.6725
Process	GO:0044089	136	543	10090	10090.ENSMUSP00000000579,10090.ENSMUSP00000000939,10090.ENSMUSP00000002303,10090.ENSMUSP00000002487,10090.ENSMUSP00000004202,10090.ENSMUSP00000006467,10090.ENSMUSP00000006912,10090.ENSMUSP00000007757,10090.ENSMUSP00000007959,10090.ENSMUSP00000009003,10090.ENSMUSP00000009143,10090.ENSMUSP00000009157,10090.ENSMUSP00000010298,10090.ENSMUSP00000013970,10090.ENSMUSP00000015137,10090.ENSMUSP00000015841…	Sox9,Hip1r,Rhoc,Braf,Dnmt1,Arpc2,Pip4k2a,Tgfbr1,Rhoa,Rala,Bmp7,Dynll1,Spire2,Pip4k2c,Limk1,Setdb1,Wasf3,Pfn1,Pip4k2b,G3bp1,Ndel1,Ctgf,Gnb2l1,Drg1,Sdc1,Grb2,Chga,F2rl1,Psmc6,Rgcc,Clu,Tfrc,Rhoq,Dpysl3,Fas,Ppp2r5b,Ppm1f,Gsn,Mapre1,Sdcbp,Abca1,Vcp,Wrap73,Fscn1,Wasl,Atf7ip,Fchsd2,Rps3,Pak1,Dock11,Gpm6a,Cbln1,Cx3cl1,Cdh5,Trhr,Zdhhc1,BC018507,S100a10,Clstn1,Atp13a2,Kiaa1551,Sh3pxd2b,Ttbk1,Wipf2,Plekhm1,…	1.28e-06	6.31e-05	Positive regulation of cellular component biogenesis	25.046
Process	GO:0030001	146	594	10090	10090.ENSMUSP00000000199,10090.ENSMUSP00000000201,10090.ENSMUSP00000001126,10090.ENSMUSP00000002848,10090.ENSMUSP00000003442,10090.ENSMUSP00000005952,10090.ENSMUSP00000009875,10090.ENSMUSP00000014920,10090.ENSMUSP00000017900,10090.ENSMUSP00000018614,10090.ENSMUSP00000018651,10090.ENSMUSP00000019044,10090.ENSMUSP00000019290,10090.ENSMUSP00000019939,10090.ENSMUSP00000020107,10090.ENSMUSP00000020171…	Ncs1,Nalcn,Slc46a1,Grin2d,Cacnb3,Slc30a4,Kcnd1,Nol3,Slc12a7,Kcnab3,Trpv2,Slc22a5,Cacng2,Snx3,Atp2b1,Ctgf,Mcu,Ap3d1,Slc22a4,Slc9a3r1,Slc6a4,Ryr2,Sfxn1,Ero1l,Micu2,Cacna2d3,Vdr,Tfrc,Asic1,Slc4a8,Slc1a1,Kcnk4,Abcb6,Snap25,Slc23a2,Anxa5,Ccdc109b,Stoml2,Slc9a1,Grik3,Cdk5,Sec61a1,Slc6a6,Fkbp4,Slc17a6,Slc5a11,Slc9a9,Fgf13,Slc6a8,Gpm6a,Tmem66,Tmem38a,Pvrl1,Anxa2,Atp1b3,Slc41a2,Sln,Kcnj2,Rep15,Kcnk9,Nipal…	1.29e-06	6.34e-05	Metal ion transport	24.5791
Process	GO:0051051	130	513	10090	10090.ENSMUSP00000000186,10090.ENSMUSP00000001115,10090.ENSMUSP00000001507,10090.ENSMUSP00000001780,10090.ENSMUSP00000001963,10090.ENSMUSP00000002487,10090.ENSMUSP00000002708,10090.ENSMUSP00000003442,10090.ENSMUSP00000004137,10090.ENSMUSP00000013842,10090.ENSMUSP00000014920,10090.ENSMUSP00000017881,10090.ENSMUSP00000019906,10090.ENSMUSP00000019939,10090.ENSMUSP00000020522,10090.ENSMUSP00000020640…	Fgf23,Grk6,Cyp51,Akt1,Ace,Braf,Shh,Cacnb3,Gstm7,Pea15a,Nol3,Mmp9,Vip,Snx3,Pfkl,Gnb2l1,Igfbp3,Srebf1,Rsad2,Slc9a3r1,Chga,Hmgcr,Rgcc,Angpt1,Atg3,Mpv17l,Asic1,Rhoq,Syt4,Gabbr1,Cnih2,Iscu,Ppm1f,Acvr1c,Snph,Fabp5,Anxa5,Sdcbp,Txn1,Tnfrsf1b,Cdk5,Lrpap1,Abcg2,Tnfrsf1a,Acsl4,Sfrp1,Cx3cl1,Stoml1,Gclc,Scamp5,Sln,Acaa2,Irs2,Arl6ip5,Oxsr1,Pacsin1,Pim3,Thbs1,Inhbb,Npy1r,Pde1c,Kcnh2,Htr2a,Ppp3ca,Fzd9,Nov,Gnai2,…	1.32e-06	6.42e-05	Negative regulation of transport	25.3411
Process	GO:0048729	156	646	10090	10090.ENSMUSP00000000095,10090.ENSMUSP00000000122,10090.ENSMUSP00000000127,10090.ENSMUSP00000000542,10090.ENSMUSP00000000579,10090.ENSMUSP00000001319,10090.ENSMUSP00000001548,10090.ENSMUSP00000001562,10090.ENSMUSP00000002303,10090.ENSMUSP00000002708,10090.ENSMUSP00000004968,10090.ENSMUSP00000005218,10090.ENSMUSP00000005234,10090.ENSMUSP00000007130,10090.ENSMUSP00000007757,10090.ENSMUSP00000007959…	Tbx2,Ngfr,Wnt3,Acvrl1,Sox9,Efnb2,Itga3,Tulp3,Rhoc,Shh,Plod3,Cd44,Wdr1,Ctnnb1,Tgfbr1,Rhoa,Rala,Bmp7,Csf1,Lama5,Ctsz,Etv4,Pfn1,Sfrp5,Egfr,Lgr5,Gna13,Rab10,Slc9a3r1,Grb2,Hif1a,Ryr2,Fst,Vcl,Spry2,Angpt1,Vdr,Robo1,Smad4,Ankrd1,Podxl,Smad7,Rdh10,Frzb,Ext2,Jag1,Lef1,Bcl10,Cyr61,Nr4a3,B4galt1,Pdpn,Sema3c,Sema3a,Ret,Lrp6,Pak1,Ilk,Col4a1,Sfrp1,Zdhhc7,Egln1,Fem1b,Ctsh,Hey1,Ppp1ca,Brsk1,Clic4,Hs2st1,Fras1,Sc…	1.35e-06	6.59e-05	Tissue morphogenesis	24.1486
Component	GO:0005911	125	489	10090	10090.ENSMUSP00000000122,10090.ENSMUSP00000000590,10090.ENSMUSP00000001319,10090.ENSMUSP00000001592,10090.ENSMUSP00000001780,10090.ENSMUSP00000003451,10090.ENSMUSP00000003717,10090.ENSMUSP00000003754,10090.ENSMUSP00000003971,10090.ENSMUSP00000005234,10090.ENSMUSP00000005256,10090.ENSMUSP00000007130,10090.ENSMUSP00000007757,10090.ENSMUSP00000007959,10090.ENSMUSP00000016771,10090.ENSMUSP00000021090…	Ngfr,Rdx,Efnb2,Jup,Akt1,Rnd1,Abcb4,Calb2,Lin7b,Wdr1,Ndrg1,Ctnnb1,Tgfbr1,Rhoa,Myh9,Grb2,Vcl,Twf1,Pvrl3,Pak2,Klhl24,Cxadr,Sympk,Vapa,Limd1,Podxl,Smad7,Fam129b,Itga6,Jag1,Anxa5,Sdcbp,B4galt1,Epb4.1l4b,Tln1,Slc2a1,Slc9a1,Fscn1,Ybx3,Pak1,Ilk,Fgf13,Cdh5,Pvrl1,Clmp,Cdh6,Kcnj2,Vezt,Jcad,Ppp1ca,Kirrel2,Atp1a1,Micall2,Clic4,Kcna2,Cdc42bpb,Sgsm3,Lama1,Tspan33,Igsf21,Mlc1,Sh3bp1,Frmd6,Pard6b,Ppp3ca,Flrt3,Nov…	1.45e-06	2.85e-05	Cell-cell junction	25.5624
COMPARTMENTS	GOCC:0099634	48	130	10090	10090.ENSMUSP00000000572,10090.ENSMUSP00000001319,10090.ENSMUSP00000002848,10090.ENSMUSP00000005077,10090.ENSMUSP00000019290,10090.ENSMUSP00000020706,10090.ENSMUSP00000023334,10090.ENSMUSP00000023441,10090.ENSMUSP00000025805,10090.ENSMUSP00000027020,10090.ENSMUSP00000036962,10090.ENSMUSP00000037255,10090.ENSMUSP00000038884,10090.ENSMUSP00000039368,10090.ENSMUSP00000044168,10090.ENSMUSP00000046129…	Gabra2,Efnb2,Grin2d,Hspb1,Cacng2,Adcy1,Pvrl3,P2rx6,Cnih2,Gria4,Clstn1,Grm1,Htr5a,Ptprf,Pacsin1,Akap9,Dagla,Grin3b,Oprd1,D3Bwg0562e,Lrrc4b,Abhd17b,Adra2c,Lrrc4,Grin2b,Gabrg2,Ptprs,Nlgn3,Rgs7bp,Shisa6,Nptx2,Gria3,Ptpro,Kcnd2,Scn8a,Cacng3,Slitrk3,Cacng7,Slitrk1,Rtn4,Lrfn1,Dcc,Grin2a,Erbb4,Lrrtm1,Lrrc4c,Cacng8,Chrm3	1.49e-06	4.9e-05	Postsynaptic specialization membrane	36.9231
COMPARTMENTS	GOCC:0099060	41	102	10090	10090.ENSMUSP00000000572,10090.ENSMUSP00000001319,10090.ENSMUSP00000002848,10090.ENSMUSP00000019290,10090.ENSMUSP00000020706,10090.ENSMUSP00000023334,10090.ENSMUSP00000023441,10090.ENSMUSP00000025805,10090.ENSMUSP00000027020,10090.ENSMUSP00000036962,10090.ENSMUSP00000037255,10090.ENSMUSP00000038884,10090.ENSMUSP00000039368,10090.ENSMUSP00000048576,10090.ENSMUSP00000050077,10090.ENSMUSP00000052306…	Gabra2,Efnb2,Grin2d,Cacng2,Adcy1,Pvrl3,P2rx6,Cnih2,Gria4,Clstn1,Grm1,Htr5a,Ptprf,Grin3b,Oprd1,D3Bwg0562e,Lrrc4b,Adra2c,Lrrc4,Grin2b,Gabrg2,Ptprs,Nlgn3,Shisa6,Gria3,Ptpro,Kcnd2,Scn8a,Cacng3,Slitrk3,Cacng7,Slitrk1,Rtn4,Lrfn1,Dcc,Grin2a,Erbb4,Lrrtm1,Lrrc4c,Cacng8,Chrm3	1.56e-06	5.05e-05	Integral component of postsynaptic specialization membrane	40.1961
Component	GO:0099060	41	102	10090	10090.ENSMUSP00000000572,10090.ENSMUSP00000001319,10090.ENSMUSP00000002848,10090.ENSMUSP00000019290,10090.ENSMUSP00000020706,10090.ENSMUSP00000023334,10090.ENSMUSP00000023441,10090.ENSMUSP00000025805,10090.ENSMUSP00000027020,10090.ENSMUSP00000036962,10090.ENSMUSP00000037255,10090.ENSMUSP00000038884,10090.ENSMUSP00000039368,10090.ENSMUSP00000048576,10090.ENSMUSP00000050077,10090.ENSMUSP00000052306…	Gabra2,Efnb2,Grin2d,Cacng2,Adcy1,Pvrl3,P2rx6,Cnih2,Gria4,Clstn1,Grm1,Htr5a,Ptprf,Grin3b,Oprd1,D3Bwg0562e,Lrrc4b,Adra2c,Lrrc4,Grin2b,Gabrg2,Ptprs,Nlgn3,Shisa6,Gria3,Ptpro,Kcnd2,Scn8a,Cacng3,Slitrk3,Cacng7,Slitrk1,Rtn4,Lrfn1,Dcc,Grin2a,Erbb4,Lrrtm1,Lrrc4c,Cacng8,Chrm3	1.56e-06	3.05e-05	Integral component of postsynaptic specialization membrane	40.1961
Process	GO:1905475	64	199	10090	10090.ENSMUSP00000000193,10090.ENSMUSP00000000543,10090.ENSMUSP00000001548,10090.ENSMUSP00000001780,10090.ENSMUSP00000003442,10090.ENSMUSP00000005066,10090.ENSMUSP00000006467,10090.ENSMUSP00000019290,10090.ENSMUSP00000020329,10090.ENSMUSP00000020640,10090.ENSMUSP00000021285,10090.ENSMUSP00000023048,10090.ENSMUSP00000024956,10090.ENSMUSP00000025399,10090.ENSMUSP00000028239,10090.ENSMUSP00000028241…	Ccl2,Grasp,Itga3,Akt1,Cacnb3,Map2k1,Arpc2,Cacng2,Egfr,Gnb2l1,Stx8,Mief1,Rhoq,Pmaip1,Gsn,Stom,Slc7a11,Cdk5,Pak1,Stx4a,Zdhhc7,Ptpn9,Stac,Fam115a,Zdhhc2,Cd81,Lrp1,Gpc1,Cnst,Ar,Fzd9,Erbb2,Arf6,Pik3r1,Vti1b,Kcnb1,Cemip,Ezr,Adam10,Epha3,Shisa6,Pgrmc1,Myo5b,Mff,Dab2,Mmp14,Itgb1,Ank3,Csnk2a1,Sorbs1,Actb,Ptn,Ddi2,Sqstm1,Ephb2,Camk2b,Cnpy4,Dpp6,Ssh1,Lypd1,Sh3glb1,Gpc5,Kcnj11,Actr3	1.58e-06	7.62e-05	Regulation of protein localization to membrane	32.1608
Process	GO:0051098	105	391	10090	10090.ENSMUSP00000000939,10090.ENSMUSP00000001780,10090.ENSMUSP00000001963,10090.ENSMUSP00000002284,10090.ENSMUSP00000007130,10090.ENSMUSP00000007757,10090.ENSMUSP00000016400,10090.ENSMUSP00000017881,10090.ENSMUSP00000019911,10090.ENSMUSP00000020640,10090.ENSMUSP00000021929,10090.ENSMUSP00000022212,10090.ENSMUSP00000022701,10090.ENSMUSP00000022721,10090.ENSMUSP00000022921,10090.ENSMUSP00000022960…	Hip1r,Akt1,Ace,Plaur,Ctnnb1,Tgfbr1,Ctsz,Mmp9,Hdac2,Gnb2l1,Habp4,Plk2,Rb1,Cln5,Angpt1,Eif3e,Lrrc6,Sympk,Arhgap28,Bambi,Smad4,Pacs1,Parp1,Fam129b,Mapre1,Hipk1,Lef1,Txn1,Stmn1,Cdk5,Lrpap1,Add2,Camk1,Pim2,Tnks,Pin1,Anxa2,S100a10,Sln,Hey1,Hnrnpk,Ptprf,Larp6,Spon1,Trib3,Bag2,Lrp1,Ttbk1,Plcl2,Zbtb7a,Grem2,Mapk3,Amfr,Ppp3ca,Itga2,Zmpste24,Cdc42,Zbtb7c,Sorl1,Nog,Nucks1,Per2,Ep300,Cthrc1,Sirt2,Ldoc1,Map2,S…	1.58e-06	7.62e-05	Regulation of binding	26.8542
KEGG	mmu04015	66	208	10090	10090.ENSMUSP00000000001,10090.ENSMUSP00000000122,10090.ENSMUSP00000000186,10090.ENSMUSP00000000299,10090.ENSMUSP00000001780,10090.ENSMUSP00000002487,10090.ENSMUSP00000004990,10090.ENSMUSP00000005066,10090.ENSMUSP00000007130,10090.ENSMUSP00000007959,10090.ENSMUSP00000009003,10090.ENSMUSP00000014743,10090.ENSMUSP00000018437,10090.ENSMUSP00000018644,10090.ENSMUSP00000020329,10090.ENSMUSP00000020706…	Gnai3,Ngfr,Fgf23,Itgb2,Akt1,Braf,Mapk14,Map2k1,Ctnnb1,Rhoa,Rala,Csf1,Pfn1,Adora2b,Egfr,Adcy1,Map2k6,Pfn4,Adcy2,Fgf9,Angpt1,Adcy8,Rassf5,Nras,Efna3,Tln1,Mras,Vav3,Rras,Thbs1,Fgf1,Mapk3,Pard6b,Cdc42,Pik3r1,Gnai2,Sipa1l1,F2r,Grin2b,Vav2,Rap1b,Prkcb,Actg1,Gnai1,Drd2,Efna5,Rac1,Mapk11,Itgb1,Fyb,Insr,Ralgds,Prkcg,Actb,Plcg1,Tek,Fgf3,Plcb4,Akt3,Met,Grin2a,Magi3,Rapgef2,Mllt4,Pdgfd,Bcar1	1.6e-06	7.61e-05	Rap1 signaling pathway	31.7308
Process	GO:0010035	138	556	10090	10090.ENSMUSP00000000186,10090.ENSMUSP00000001780,10090.ENSMUSP00000002487,10090.ENSMUSP00000002708,10090.ENSMUSP00000003320,10090.ENSMUSP00000003550,10090.ENSMUSP00000005952,10090.ENSMUSP00000006949,10090.ENSMUSP00000014370,10090.ENSMUSP00000015481,10090.ENSMUSP00000015950,10090.ENSMUSP00000016138,10090.ENSMUSP00000017629,10090.ENSMUSP00000017881,10090.ENSMUSP00000019290,10090.ENSMUSP00000019911…	Fgf23,Akt1,Braf,Shh,Eif2b5,Ncstn,Slc30a4,Tph2,Cacybp,Endog,Qdpr,Fnta,Top2b,Mmp9,Cacng2,Hdac2,Lrp11,Ascl1,Avpr1a,Egfr,Adcy1,Sdc1,Hif1a,Fos,Ryr2,Glud1,Anxa11,Nefl,Loxl2,Adcy8,Tfrc,Sod1,Xdh,Cyp1b1,Cuta,Syt4,Impact,Fas,Rela,Prdx3,Nptx1,Parp1,Gsn,Cat,Cst3,Anxa5,Slc25a24,Casp6,Gucy1b3,Cpne3,Nr4a3,Txn1,Vcp,Prkaa2,Pink1,Mtf1,Casp9,Cd9,Rps3,Star,Egln1,Gsta4,Gclc,Tspo,Ppp1ca,Atp13a2,Clic4,Lonp1,Alg2,Thbs1,…	1.62e-06	7.73e-05	Response to inorganic substance	24.8201
Function	GO:0050839	80	272	10090	10090.ENSMUSP00000000299,10090.ENSMUSP00000001548,10090.ENSMUSP00000001592,10090.ENSMUSP00000003061,10090.ENSMUSP00000005255,10090.ENSMUSP00000005256,10090.ENSMUSP00000007130,10090.ENSMUSP00000015791,10090.ENSMUSP00000016315,10090.ENSMUSP00000016771,10090.ENSMUSP00000017610,10090.ENSMUSP00000020171,10090.ENSMUSP00000020329,10090.ENSMUSP00000021963,10090.ENSMUSP00000023334,10090.ENSMUSP00000023572…	Itgb2,Itga3,Jup,Bcam,Wisp1,Ndrg1,Ctnnb1,Lama5,Lamb3,Myh9,Timp2,Ctgf,Egfr,Caml,Pvrl3,Cxadr,Gfra1,P4hb,Itgb8,Itga6,Cd1d1,Cyr61,Sdcbp,Tln1,Cd9,Ilk,Cx3cl1,Cdh5,Pvrl1,Cdh6,Cib2,Ppp1ca,Ptprf,Sema7a,Cd81,Thbs1,Fgf1,Cpe,Cdh20,S1pr2,Itga2,Nov,Dscam,Gldn,Grin2b,Neo1,Ezr,Gfap,Cdh24,Nlgn3,Cdh22,Cdh12,Cdh11,Ptpro,Numbl,Dab2,Edil3,Adam9,Cntn6,Mmp14,Itgb1,Acvr1,Ank3,Ptn,Itga4,Rtn4,L1cam,Cd151,Adam8,Vstm2l,Nf2,T…	1.63e-06	0.00013	Cell adhesion molecule binding	29.4118
Keyword	KW-0564	92	329	10090	10090.ENSMUSP00000000001,10090.ENSMUSP00000001115,10090.ENSMUSP00000001548,10090.ENSMUSP00000001652,10090.ENSMUSP00000002708,10090.ENSMUSP00000018644,10090.ENSMUSP00000018880,10090.ENSMUSP00000020323,10090.ENSMUSP00000020329,10090.ENSMUSP00000020930,10090.ENSMUSP00000021201,10090.ENSMUSP00000022185,10090.ENSMUSP00000022369,10090.ENSMUSP00000023486,10090.ENSMUSP00000023572,10090.ENSMUSP00000023707…	Gnai3,Grk6,Itga3,Bdkrb2,Shh,Adora2b,Ndel1,Avpr1a,Egfr,Gna13,Cpd,F2rl1,Vcl,Tfrc,Cxadr,Sod1,Dhh,Tnfrsf21,Abcg1,Gnal,Ifitm3,Gria4,Mgst3,Stom,Itga6,Snap25,Stmn2,Nras,Abca1,Zdhhc21,Rnf11,Gabrg1,Scarb2,Tgfa,Olr1,Lrp6,Cd9,Cckbr,Mpp1,Zdhhc7,Zdhhc1,Nmnat2,Rhov,Kcna2,Zdhhc2,Rras,Zdhhc17,Zdhhc9,Npy1r,Oprd1,Ckap4,Amfr,Ar,Cdc42se1,S1pr2,Adra1a,Nov,Kcna1,Abhd17b,Aldh3b1,Gnai2,Rhoj,Pgr,Gabrg2,Rgs7bp,Pi4k2a,Rras…	1.71e-06	4.39e-05	Palmitate	27.9635
Process	GO:1904951	100	368	10090	10090.ENSMUSP00000000193,10090.ENSMUSP00000001452,10090.ENSMUSP00000001592,10090.ENSMUSP00000002029,10090.ENSMUSP00000002320,10090.ENSMUSP00000002708,10090.ENSMUSP00000003442,10090.ENSMUSP00000004990,10090.ENSMUSP00000006467,10090.ENSMUSP00000009157,10090.ENSMUSP00000020312,10090.ENSMUSP00000020329,10090.ENSMUSP00000020640,10090.ENSMUSP00000021514,10090.ENSMUSP00000021530,10090.ENSMUSP00000022185…	Ccl2,Cct3,Jup,Emd,Ppard,Shh,Cacnb3,Mapk14,Arpc2,Dynll1,Mcu,Egfr,Gnb2l1,Ppm1a,Hif1a,F2rl1,Glud1,Rgcc,Cct5,Adcy8,Mief1,Abcg1,Pmaip1,Ankrd1,Cct8,Casp1,Rab29,Stom,Ppid,Serp1,Cdk5,Tomm7,Cd38,Rufy3,Cct6a,Aacs,Camk1,Tnfrsf1a,Ipo5,Pak1,Stx4a,Acsl4,Tmem30a,Scamp5,Fam115a,BC018507,Irs2,Pck2,Ptpn23,Atp13a2,Zdhhc2,Cd81,Lrp1,Camk4,Myrip,Cnst,Gpi1,Erbb2,Cdc42,Arf6,Cd14,Pik3r1,Golph3,Kcnb1,Olfr78,Sorl1,Camk2n1,…	1.8e-06	8.52e-05	Positive regulation of establishment of protein localization	27.1739
Process	GO:0035239	171	728	10090	10090.ENSMUSP00000000095,10090.ENSMUSP00000000193,10090.ENSMUSP00000000542,10090.ENSMUSP00000000579,10090.ENSMUSP00000001319,10090.ENSMUSP00000001562,10090.ENSMUSP00000001780,10090.ENSMUSP00000001963,10090.ENSMUSP00000002708,10090.ENSMUSP00000004208,10090.ENSMUSP00000004990,10090.ENSMUSP00000005218,10090.ENSMUSP00000005279,10090.ENSMUSP00000007130,10090.ENSMUSP00000007757,10090.ENSMUSP00000007959…	Tbx2,Ccl2,Acvrl1,Sox9,Efnb2,Tulp3,Akt1,Ace,Shh,Angptl2,Mapk14,Cd44,Klf5,Ctnnb1,Tgfbr1,Rhoa,Elk3,Rala,Bmp7,Csf1,Lama5,Ctsz,Myh9,Etv4,Pfn1,Sfrp5,D17Wsu104e,Ctgf,Egfr,Lgr5,Gna13,Hif1a,Ryr2,Fgf9,Loxl2,Spry2,Ywhaz,Angpt1,Vdr,Robo1,Nus1,Cyp1b1,Smad4,Slc1a1,Itgb8,Mmp19,Podxl,Smad7,Rdh10,Jag1,Spred1,Lef1,Apoa1bp,Bcl10,Cyr61,Nr4a3,B4galt1,Pdpn,Tgfa,Ret,Lrp6,Nr2f2,Pak1,Ilk,Gpr124,Col4a1,Sfrp1,Hpgd,Cx3cl1,M…	1.8e-06	8.52e-05	Tube morphogenesis	23.489
Process	GO:0061387	47	127	10090	10090.ENSMUSP00000000127,10090.ENSMUSP00000000641,10090.ENSMUSP00000001347,10090.ENSMUSP00000004326,10090.ENSMUSP00000004920,10090.ENSMUSP00000015137,10090.ENSMUSP00000018651,10090.ENSMUSP00000018880,10090.ENSMUSP00000022629,10090.ENSMUSP00000025993,10090.ENSMUSP00000030568,10090.ENSMUSP00000030714,10090.ENSMUSP00000030814,10090.ENSMUSP00000030862,10090.ENSMUSP00000030868,10090.ENSMUSP00000031229…	Wnt3,Sema4f,Rnd2,Plxna3,Ulk2,Limk1,Trpv2,Ndel1,Dpysl2,Slit1,Sema3c,Sema3a,Cdk5,Draxin,Sema3d,Rufy3,Pak1,Ilk,Fgf13,Ist1,Sema7a,Lrp1,Ttl,Map3k13,Trpc5,Dscam,Ptprs,Ep300,Sema5a,Sema3e,Myo5b,Efna5,Map2,Cdkl5,Adnp,Rgma,Cttn,Rtn4,L1cam,Tnr,Plxna4,Disc1,Rnf6,Slit2,Sema6b,Omg,Actr3	1.82e-06	8.55e-05	Regulation of extent of cell growth	37.0079
RCTM	MMU-109582	131	524	10090	10090.ENSMUSP00000000001,10090.ENSMUSP00000000299,10090.ENSMUSP00000000984,10090.ENSMUSP00000001513,10090.ENSMUSP00000001548,10090.ENSMUSP00000001780,10090.ENSMUSP00000002284,10090.ENSMUSP00000004990,10090.ENSMUSP00000005218,10090.ENSMUSP00000005234,10090.ENSMUSP00000006104,10090.ENSMUSP00000006697,10090.ENSMUSP00000007959,10090.ENSMUSP00000009530,10090.ENSMUSP00000014694,10090.ENSMUSP00000017188…	Gnai3,Itgb2,Slc7a7,Tubb6,Itga3,Akt1,Plaur,Mapk14,Cd44,Wdr1,P2rx5,Itih3,Rhoa,Timp1,Zfyve20,Serpinb6a,Hdac2,Atp2b1,Timp3,Sdc1,Gna13,Kif3c,Grb2,Pik3r5,Habp4,Vcl,Clu,Ywhaz,Angpt1,Pde1b,P2rx6,Cxadr,Pros1,Sod1,Ehd3,Gna14,Ehd1,Ppp2r5b,Apool,Spp2,Grb14,Itga6,Kif3b,Ptpn1,Procr,Anxa5,Slc7a11,Nras,Tln1,Pdpn,Tuba8,Olr1,Cd9,Kif22,Stx4a,Dock11,Plat,Slc7a6,Anxa2,Atp1b3,Vav3,S100a10,Prkar2b,Sccpdh,Gng10,Thbs1,Sl…	2.16e-06	0.00039	Hemostasis	25
Process	GO:0043069	209	933	10090	10090.ENSMUSP00000000001,10090.ENSMUSP00000000122,10090.ENSMUSP00000000579,10090.ENSMUSP00000000939,10090.ENSMUSP00000001652,10090.ENSMUSP00000001780,10090.ENSMUSP00000002284,10090.ENSMUSP00000002320,10090.ENSMUSP00000002487,10090.ENSMUSP00000002708,10090.ENSMUSP00000003313,10090.ENSMUSP00000004202,10090.ENSMUSP00000005066,10090.ENSMUSP00000005077,10090.ENSMUSP00000005218,10090.ENSMUSP00000005647…	Gnai3,Ngfr,Sox9,Hip1r,Bdkrb2,Akt1,Plaur,Ppard,Braf,Shh,Grk5,Dnmt1,Map2k1,Hspb1,Cd44,Ndufs3,Por,Snx6,Trap1,Ctnnb1,Tgfbr1,Rhoa,Bmp7,Timp1,Pea15a,Nol3,Fnta,Mmp9,Nrbp2,D17Wsu104e,Vip,Hdac2,Ascl1,Egfr,Ccng1,Btg2,Nme2,Hif1a,Arg2,Naa35,Hmgcr,Plk2,Vdac2,Clu,Nefl,Rb1,Spry2,Bcl2l2,Fam134b,Angpt1,Bcl6,Mpv17l,Rrn3,Pak2,Tfrc,Sod1,Faim2,Ivns1abp,Pim1,Glo1,Eif2ak2,Bag6,Fas,Peli3,Rela,Prdx3,Cops5,Cln8,Lhx4,Yme1l…	2.22e-06	0.0001	Negative regulation of programmed cell death	22.4009
Process	GO:0048870	216	971	10090	10090.ENSMUSP00000000193,10090.ENSMUSP00000000299,10090.ENSMUSP00000000542,10090.ENSMUSP00000000641,10090.ENSMUSP00000001319,10090.ENSMUSP00000001548,10090.ENSMUSP00000001592,10090.ENSMUSP00000001780,10090.ENSMUSP00000002303,10090.ENSMUSP00000002320,10090.ENSMUSP00000002708,10090.ENSMUSP00000002976,10090.ENSMUSP00000004646,10090.ENSMUSP00000005066,10090.ENSMUSP00000005218,10090.ENSMUSP00000005234…	Ccl2,Itgb2,Acvrl1,Sema4f,Efnb2,Itga3,Jup,Akt1,Rhoc,Ppard,Shh,Il17ra,Coro1c,Map2k1,Cd44,Wdr1,Ctnnb1,Tgfbr1,Rhoa,Coro1b,Lama5,Lamb3,Myh9,Top2b,Ndel1,Wwc1,Gipc1,Ctgf,Pex7,Ntn4,Ascl1,Egfr,Sdc1,Fam84a,Ccl7,Coro6,Srp54a,Hif1a,Chga,Hexb,F2rl1,Loxl2,Lrrc6,Cxadr,Robo1,Cyp1b1,Rhoq,Bambi,Zfand5,Slit1,Gfra1,Limd1,Itgb8,Sbds,Ric8,Podxl,Itga6,Mapre1,Fam83d,Lef1,Lamtor2,Cyr61,B4galt1,Pdpn,Lurap1,Sema3c,Sema3a,C…	2.26e-06	0.00011	Cell motility	22.2451
Process	GO:0007005	108	410	10090	10090.ENSMUSP00000000058,10090.ENSMUSP00000000642,10090.ENSMUSP00000000939,10090.ENSMUSP00000001127,10090.ENSMUSP00000001780,10090.ENSMUSP00000002891,10090.ENSMUSP00000004868,10090.ENSMUSP00000011029,10090.ENSMUSP00000014920,10090.ENSMUSP00000016571,10090.ENSMUSP00000018466,10090.ENSMUSP00000018711,10090.ENSMUSP00000019044,10090.ENSMUSP00000020000,10090.ENSMUSP00000022040,10090.ENSMUSP00000022590…	Cav2,Hk2,Hip1r,Poldip2,Akt1,Top3a,Mtfp1,Dnajc19,Nol3,Ndufa1,Tomm34,Gabarap,Slc22a5,Hebp2,Agtpbp1,Dnajc15,Bcl2l2,Ywhaz,Ndufb9,Mief1,Samm50,Ndufa6,Sharpin,Atg3,Mpv17l,Cxadr,Ndufaf7,Pmaip1,Prdx3,Fundc1,Apool,Nptx1,Ndufb3,Cln8,Rab29,Parp1,Yme1l1,Gclm,Stoml2,Pink1,Slc9a1,Cdk5,Tomm7,Pmpcb,Gabarapl1,Tmem126b,Ndufc2,Pim2,Timm17b,Fundc2,Cox7a2,Gclc,Ndufaf5,Atcay,Ndufb7,Acaa2,Atg12,Acn9,Lonp1,Ndufb10,Mcl1,…	2.37e-06	0.00011	Mitochondrion organization	26.3415
Keyword	KW-0458	85	299	10090	10090.ENSMUSP00000002007,10090.ENSMUSP00000002100,10090.ENSMUSP00000002885,10090.ENSMUSP00000004173,10090.ENSMUSP00000005952,10090.ENSMUSP00000006235,10090.ENSMUSP00000015171,10090.ENSMUSP00000016400,10090.ENSMUSP00000019962,10090.ENSMUSP00000020537,10090.ENSMUSP00000021668,10090.ENSMUSP00000022169,10090.ENSMUSP00000022721,10090.ENSMUSP00000023088,10090.ENSMUSP00000023554,10090.ENSMUSP00000023689…	Siae,Tmem25,Epdr1,Cdip1,Slc30a4,Ctsb,Galns,Ctsz,Cd164,Nsg2,Npc2,Hexb,Cln5,Naga,Dirc2,Ifnar1,Mic1,Seh1l,Slc15a3,Hexa,Ifitm3,Tmem192,Itm2c,Arl8a,Dpp7,Sppl2a,Snx16,Lamtor2,Cd1d1,Ppt1,Fuca1,Nsg1,Scarb2,Vps33a,Atp6ap2,Man2b1,Ifi30,Pla2g15,Ldlr,Ctsh,Sppl2b,Rragb,Atp13a2,March9,Smpd1,Wdr48,Gns,Uvrag,Ap5m1,Pde1c,Plekhm1,Slc2a6,Rnf152,Slc38a9,Lamp2,Lipa,Vti1b,Slc35f6,Borcs6,Grin2b,Rab39,Rab7b,Vps41,Tecpr1…	2.43e-06	5.76e-05	Lysosome	28.4281
TISSUES	BTO:0001487	165	701	10090	10090.ENSMUSP00000000260,10090.ENSMUSP00000000299,10090.ENSMUSP00000000466,10090.ENSMUSP00000000542,10090.ENSMUSP00000000896,10090.ENSMUSP00000001507,10090.ENSMUSP00000001780,10090.ENSMUSP00000002303,10090.ENSMUSP00000002840,10090.ENSMUSP00000003964,10090.ENSMUSP00000007130,10090.ENSMUSP00000008878,10090.ENSMUSP00000011029,10090.ENSMUSP00000015481,10090.ENSMUSP00000015791,10090.ENSMUSP00000016401…	Gmpr,Itgb2,Plin2,Acvrl1,Pxmp4,Cyp51,Akt1,Rhoc,Pex6,Gys1,Ctnnb1,Gprc5b,Dnajc19,Endog,Lama5,Slmo2,Ndufa1,Slc22a5,Armc6,Cyb561,Nuak1,Gfpt2,Srebf1,Nampt,Trappc6b,Ogn,Dnajc15,Rgcc,Mief1,Bcl6,Eif2ak2,Ankrd2,Scd2,Cyp27a1,Mrpl44,Mrrf,Grb14,Agpat2,Crls1,Mrps5,Ptpn1,Cd1d1,Prkaa2,Cdk5,Cd38,Uchl1,Sparcl1,Npy,Rtn2,Dgat2,Vkorc1,Stx4a,Nono,Mpp1,Tmem66,Rbl2,Cdh5,Egln1,Fbxo22,Ctsh,Dpp8,Nt5e,Scd1,Tspo,Letmd1,Mpv17…	2.46e-06	0.00018	Adipose tissue	23.5378
Function	GO:0046983	212	951	10090	10090.ENSMUSP00000000058,10090.ENSMUSP00000000305,10090.ENSMUSP00000000939,10090.ENSMUSP00000001416,10090.ENSMUSP00000001548,10090.ENSMUSP00000001652,10090.ENSMUSP00000001780,10090.ENSMUSP00000002808,10090.ENSMUSP00000003572,10090.ENSMUSP00000003575,10090.ENSMUSP00000004137,10090.ENSMUSP00000004327,10090.ENSMUSP00000005077,10090.ENSMUSP00000005798,10090.ENSMUSP00000006611,10090.ENSMUSP00000006692…	Cav2,Tpd52l1,Hip1r,Hars,Itga3,Bdkrb2,Akt1,Prkra,Gars,Tpm4,Gstm7,G6pdx,Hspb1,Snx6,Srm,Mvd,Cacybp,Csf1,Myh9,Top2b,Rab11fip4,Pip4k2b,Pnpo,Fxr2,Pank3,Uhrf1bp1l,Pex7,Ascl1,Gnb2l1,Srebf1,E2f6,Gtf2a1,Hif1a,Tkt,Micu2,Bcl2l2,Adcy8,Cby1,Naga,Pvrl3,Tfrc,Ache,Abcg1,Xdh,Vapa,Syt4,Tap2,Gabbr1,Smad4,Rela,P4hb,Hexa,Rdh5,Tmem192,Mkln1,Atf6,Stom,Cat,Ext2,Sppl2a,Nfs1,S100a11,Bcl10,Sdcbp,Nr4a3,Txn1,Glipr2,Mmachc,Cda…	2.49e-06	0.00019	Protein dimerization activity	22.2923
Process	GO:0007611	86	304	10090	10090.ENSMUSP00000001548,10090.ENSMUSP00000002487,10090.ENSMUSP00000003550,10090.ENSMUSP00000019906,10090.ENSMUSP00000020040,10090.ENSMUSP00000020288,10090.ENSMUSP00000020329,10090.ENSMUSP00000020692,10090.ENSMUSP00000020706,10090.ENSMUSP00000021195,10090.ENSMUSP00000021530,10090.ENSMUSP00000021674,10090.ENSMUSP00000021898,10090.ENSMUSP00000022176,10090.ENSMUSP00000022212,10090.ENSMUSP00000022322…	Itga3,Braf,Ncstn,Vip,Nts,Eif4ebp2,Egfr,Btg2,Adcy1,Slc6a4,Hif1a,Fos,Shc3,Hmgcr,Plk2,Glud1,Jph4,Adcy8,Pde1b,Asic1,Syt4,Kcnk4,Jph3,Ric8,Casp1,Cln8,Snap25,Slc7a11,Calb1,Ppt1,Cdk5,Pak1,Fgf13,Aff2,Man2b1,Ldlr,Tanc1,Brsk1,Prkar2b,Egr2,Ttbk1,Camk4,Htr2a,Gpi1,Amfr,Fzd9,Rcan1,Crh,Nog,Grin2b,Nlgn3,Ep300,Chat,Nf1,Nptx2,Pgrmc1,Drd2,Crtc1,En1,Htt,Syngap1,Cntn2,Adnp,Itgb1,Casp3,Pias1,Slc12a5,Pak6,Prkcg,Ptn,Thra…	2.5e-06	0.00011	Learning or memory	28.2895
Process	GO:0099537	96	352	10090	10090.ENSMUSP00000000058,10090.ENSMUSP00000000572,10090.ENSMUSP00000002848,10090.ENSMUSP00000003442,10090.ENSMUSP00000003971,10090.ENSMUSP00000005509,10090.ENSMUSP00000006181,10090.ENSMUSP00000007130,10090.ENSMUSP00000009538,10090.ENSMUSP00000017900,10090.ENSMUSP00000019577,10090.ENSMUSP00000021898,10090.ENSMUSP00000023259,10090.ENSMUSP00000023441,10090.ENSMUSP00000025110,10090.ENSMUSP00000025338…	Cav2,Gabra2,Grin2d,Cacnb3,Lin7b,Stx1a,Napa,Ctnnb1,Syn2,Slc12a7,Gipc1,Shc3,Lynx1,P2rx6,Syt4,Gabbr1,Cnih2,Apba1,Farp1,Gria4,Snap25,Napb,Gucy1b3,Glrb,Sdcbp,Ppt1,Grik3,Cdk5,Gabrd,Nsg1,Gabrg1,Lrp6,Slc17a6,Fchsd2,Pak1,Stx4a,Plat,Cx3cl1,Clstn1,Grm1,Cplx1,Htr5a,Brsk1,Sncb,Syde1,Pcdh8,Rims4,Dagla,Camk4,Htr2a,Grin3b,Ppp3ca,Syt12,Ric3,Crh,F2r,Grin2b,Gabrg2,Ptprn2,Nlgn3,Chat,Shisa6,Nf1,Otof,Drd2,Gria3,Rph3a,…	2.52e-06	0.00012	Trans-synaptic signaling	27.2727
Process	GO:0007265	63	198	10090	10090.ENSMUSP00000000122,10090.ENSMUSP00000001479,10090.ENSMUSP00000004202,10090.ENSMUSP00000007959,10090.ENSMUSP00000009003,10090.ENSMUSP00000015841,10090.ENSMUSP00000020930,10090.ENSMUSP00000020986,10090.ENSMUSP00000021001,10090.ENSMUSP00000021076,10090.ENSMUSP00000021090,10090.ENSMUSP00000021459,10090.ENSMUSP00000022212,10090.ENSMUSP00000022701,10090.ENSMUSP00000023151,10090.ENSMUSP00000025019…	Ngfr,Kpnb1,Dnmt1,Rhoa,Rala,Setdb1,Gna13,Dnajc27,Rab10,Rab37,Grb2,Rab15,Plk2,Rb1,Bcl6,Arhgdig,Rab29,Rsu1,Nras,Rit1,Sdcbp,Pdpn,Brap,Rab35,Rab30,Rab6a,Mras,Rab6b,Dhcr24,Rhov,Rras,Sgsm3,Tax1bp3,Eps8,Cdc42,Rhoj,Cdc42ep2,Arhgdia,Rab39,Rab7b,Rap1b,Sos1,Rab31,Rras2,Nf1,Rac1,Syngap1,Wasf2,Hrasls,Psd3,Cdc42ep4,Jun,Ralgapa2,Rerg,Cdh13,Rapgef2,Rab4a,Rab27b,Rit2,Rab36,Rab3c,Arhgap32,Ksr2	2.54e-06	0.00012	Ras protein signal transduction	31.8182
Component	GO:0042734	65	207	10090	10090.ENSMUSP00000000109,10090.ENSMUSP00000001319,10090.ENSMUSP00000003550,10090.ENSMUSP00000005509,10090.ENSMUSP00000007130,10090.ENSMUSP00000020107,10090.ENSMUSP00000021195,10090.ENSMUSP00000023007,10090.ENSMUSP00000023776,10090.ENSMUSP00000024099,10090.ENSMUSP00000025338,10090.ENSMUSP00000025830,10090.ENSMUSP00000028727,10090.ENSMUSP00000028951,10090.ENSMUSP00000030676,10090.ENSMUSP00000033075…	Cntn1,Efnb2,Ncstn,Stx1a,Ctnnb1,Atp2b1,Slc6a4,Adcy8,Slc4a8,Ache,Gabbr1,Apba1,Snap25,Snph,Grik3,Stx4a,Gpm6a,Pvrl1,Grm1,Exoc3,Kcna2,Zdhhc17,Psenen,Pcdh8,Rims4,Igsf21,Htr2a,Oprd1,Lrrc4b,Adra1a,Kcna1,Kctd8,Kcnj9,Grin2b,Kcnj3,Ptprs,Rgs7bp,Pi4k2a,Flot2,Otof,Drd2,Gria3,Scn1a,Scn8a,Cntn6,Erc2,Stxbp1,Cltb,Snap91,Dennd1a,L1cam,Ephb2,Gabbr2,Kcnc3,Cadm3,Grik4,Grin2a,Grm4,Erbb4,Stxbp5,Prrt2,Ncam1,Chrm2,Htr1b,C…	2.56e-06	4.92e-05	Presynaptic membrane	31.401
Process	GO:0033157	72	239	10090	10090.ENSMUSP00000000193,10090.ENSMUSP00000000543,10090.ENSMUSP00000001592,10090.ENSMUSP00000002029,10090.ENSMUSP00000002708,10090.ENSMUSP00000003442,10090.ENSMUSP00000004990,10090.ENSMUSP00000006467,10090.ENSMUSP00000014920,10090.ENSMUSP00000018880,10090.ENSMUSP00000019939,10090.ENSMUSP00000020846,10090.ENSMUSP00000020986,10090.ENSMUSP00000021514,10090.ENSMUSP00000022921,10090.ENSMUSP00000023048…	Ccl2,Grasp,Jup,Emd,Shh,Cacnb3,Mapk14,Arpc2,Nol3,Ndel1,Snx3,Srebf1,Dnajc27,Ppm1a,Angpt1,Mief1,Pmaip1,Rab29,Uhmk1,Stom,Ptpn1,Txn1,Pink1,Cdk5,Tomm7,Rufy3,Camk1,Tnfrsf1a,Ipo5,Pak1,Nucb1,Tmem30a,Fam115a,BC018507,Atp13a2,Zdhhc2,Cd81,Camk4,Erbb2,Gcc2,Cdc42,Sh3tc2,Pik3r1,Kcnb1,Sorl1,Slc35d3,Insig1,Cemip,Atpif1,Sp100,Ep300,Ywhae,Nf1,Mff,Edem1,Agtr2,Ank3,Svip,Tek,Nsun2,Ubr5,Dctn1,Derl2,Pdcd10,Rangap1,Os9,S…	2.62e-06	0.00012	Regulation of intracellular protein transport	30.1255
Process	GO:0072001	87	310	10090	10090.ENSMUSP00000000579,10090.ENSMUSP00000001319,10090.ENSMUSP00000001548,10090.ENSMUSP00000001963,10090.ENSMUSP00000002708,10090.ENSMUSP00000005218,10090.ENSMUSP00000005532,10090.ENSMUSP00000007130,10090.ENSMUSP00000007757,10090.ENSMUSP00000009143,10090.ENSMUSP00000014447,10090.ENSMUSP00000015791,10090.ENSMUSP00000020350,10090.ENSMUSP00000020911,10090.ENSMUSP00000021550,10090.ENSMUSP00000022921…	Sox9,Efnb2,Itga3,Ace,Shh,Cd44,Nid1,Ctnnb1,Tgfbr1,Bmp7,Glis2,Lama5,Lgr5,Sdc1,Arg2,Angpt1,Adamts1,Bag6,Smad4,Podxl,Smad7,Rdh10,Cat,Jag1,Smad9,Calb1,Casp9,Mmp17,Sec61a1,Ret,Ilk,Col4a1,Sfrp1,Hpgd,Acat1,Ctsh,Six4,Hey1,Foxj1,Hs2st1,Fras1,Pygo1,Prkx,Fgf1,Tiparp,Acta2,Greb1l,Dact2,Pou3f3,Zmpste24,Basp1,Nup160,Nog,Fat4,Has2,Nup107,Smad1,Nf1,Nfia,Ptpro,Cyp26b1,Sox11,Notch2,Mtss1,Aqp11,Notch3,Agtr2,Klhl3,Wn…	2.86e-06	0.00013	Renal system development	28.0645
Process	GO:2001233	108	412	10090	10090.ENSMUSP00000000001,10090.ENSMUSP00000000122,10090.ENSMUSP00000000305,10090.ENSMUSP00000000939,10090.ENSMUSP00000001652,10090.ENSMUSP00000001780,10090.ENSMUSP00000002284,10090.ENSMUSP00000002808,10090.ENSMUSP00000005066,10090.ENSMUSP00000005077,10090.ENSMUSP00000005218,10090.ENSMUSP00000005647,10090.ENSMUSP00000006137,10090.ENSMUSP00000007130,10090.ENSMUSP00000007757,10090.ENSMUSP00000013842…	Gnai3,Ngfr,Tpd52l1,Hip1r,Bdkrb2,Akt1,Plaur,Prkra,Map2k1,Hspb1,Cd44,Ndufs3,Trap1,Ctnnb1,Tgfbr1,Pea15a,Nol3,Serinc3,Mmp9,Hdac2,Il20ra,Timp3,Gnb2l1,Slc9a3r1,Hif1a,Vdac2,Clu,Rb1,Bcl2l2,Mpv17l,Rrn3,Pak2,Sod1,Faim2,Ivns1abp,Pmaip1,Fas,Peli3,Rela,P4hb,Maged1,Ankrd2,Itm2c,Parp1,Gsn,Itga6,Ptpn1,Lmna,Gclm,Bcl10,Txndc12,Pink1,Ret,Ybx3,Ltbr,Ddias,Maz,Rps3,Stx4a,Nono,Sfrp1,Sh3rf1,Cx3cl1,Fem1b,Phip,Gclc,Ctsh,A…	2.86e-06	0.00013	Regulation of apoptotic signaling pathway	26.2136
Process	GO:0006812	188	825	10090	10090.ENSMUSP00000000090,10090.ENSMUSP00000000199,10090.ENSMUSP00000000201,10090.ENSMUSP00000001126,10090.ENSMUSP00000002848,10090.ENSMUSP00000003442,10090.ENSMUSP00000004396,10090.ENSMUSP00000005952,10090.ENSMUSP00000009875,10090.ENSMUSP00000014920,10090.ENSMUSP00000017900,10090.ENSMUSP00000018614,10090.ENSMUSP00000018651,10090.ENSMUSP00000019044,10090.ENSMUSP00000019231,10090.ENSMUSP00000019290…	Cox5a,Ncs1,Nalcn,Slc46a1,Grin2d,Cacnb3,Atp6v1f,Slc30a4,Kcnd1,Nol3,Slc12a7,Kcnab3,Trpv2,Slc22a5,Atp6ap1,Cacng2,Atp6v1e1,Snx3,Atp2b1,Ctgf,Mcu,Ap3d1,Slc22a4,Slc9a3r1,Sec14l1,Slc6a4,Atp6v1d,Slc25a29,Ryr2,Sfxn1,Ero1l,Micu2,Cacna2d3,Ywhaz,Slc25a17,Vdr,P2rx6,Tfrc,Atp5o,Asic1,Slc4a8,Slc15a3,Slc1a1,Kcnk4,Gria4,Abcb6,Snap25,Slc23a2,Anxa5,Ccdc109b,Stoml2,Slc9a1,Grik3,Cdk5,Abcg2,Sec61a1,Slc6a6,Fkbp4,Slc17a6,…	2.92e-06	0.00013	Cation transport	22.7879
Function	GO:0022857	212	954	10090	10090.ENSMUSP00000000090,10090.ENSMUSP00000000199,10090.ENSMUSP00000000201,10090.ENSMUSP00000000572,10090.ENSMUSP00000000984,10090.ENSMUSP00000001126,10090.ENSMUSP00000002848,10090.ENSMUSP00000003442,10090.ENSMUSP00000003622,10090.ENSMUSP00000003717,10090.ENSMUSP00000004396,10090.ENSMUSP00000005952,10090.ENSMUSP00000007207,10090.ENSMUSP00000007257,10090.ENSMUSP00000009522,10090.ENSMUSP00000009875…	Cox5a,Ncs1,Nalcn,Gabra2,Slc7a7,Slc46a1,Grin2d,Cacnb3,Slc25a1,Abcb4,Atp6v1f,Slc30a4,Clcn2,Clic1,Slc16a12,Kcnd1,Slc25a11,Slc12a7,Kcnab3,Trpv2,Slc22a5,Slc35b4,Cacng2,Atp6v1e1,Atp2b1,Mcu,Slc22a4,Abca8b,Slc9a3r1,Slc6a4,Atp6v1d,Slc25a29,Ryr2,Sfxn1,Vdac2,Cacna2d3,Slc25a30,Ank,Slc25a17,P2rx6,Tfrc,Atp5o,Asic1,Slc4a8,Abcg1,Tap2,Slc15a3,Slc1a1,Kcnk4,Gria4,Abcb6,Slc16a14,Tmem206,Snap25,Slc23a2,Anxa5,Slc7a11,…	2.98e-06	0.00022	Transmembrane transporter activity	22.2222
Process	GO:0010810	66	213	10090	10090.ENSMUSP00000000542,10090.ENSMUSP00000001548,10090.ENSMUSP00000001592,10090.ENSMUSP00000002487,10090.ENSMUSP00000004646,10090.ENSMUSP00000005532,10090.ENSMUSP00000006467,10090.ENSMUSP00000007959,10090.ENSMUSP00000014743,10090.ENSMUSP00000022369,10090.ENSMUSP00000023151,10090.ENSMUSP00000026122,10090.ENSMUSP00000027373,10090.ENSMUSP00000028059,10090.ENSMUSP00000028522,10090.ENSMUSP00000028619…	Acvrl1,Itga3,Jup,Braf,Coro1c,Nid1,Arpc2,Rhoa,Csf1,Vcl,Bcl6,P4hb,Ppm1f,Rsu1,Itga6,Hsd17b12,Jag1,Cyr61,Pdpn,Ilk,S100a10,Acer2,Rras,Lrp1,Thbs1,Fbln2,Hoxa7,Cdc42,Pik3r1,Has2,Epha3,Dmp1,Gcnt2,Nf1,Actg1,Sema3e,Efna5,Rac1,Dab2,Edil3,Col8a1,Lgals1,Mmp14,Itgb1,Prkce,Ptn,Tbcd,Tek,L1cam,Ajap1,Bcl2,Tsc1,Fzd7,Peak1,Plet1,Thy1,Cfl1,Disc1,Cdh13,Macf1,Cdk6,Map4k4,Bcar1,Myadm,Foxf1,Spock1	3.11e-06	0.00014	Regulation of cell-substrate adhesion	30.9859
RCTM	MMU-71387	77	264	10090	10090.ENSMUSP00000000642,10090.ENSMUSP00000002412,10090.ENSMUSP00000003622,10090.ENSMUSP00000003964,10090.ENSMUSP00000004327,10090.ENSMUSP00000005218,10090.ENSMUSP00000011896,10090.ENSMUSP00000014750,10090.ENSMUSP00000015171,10090.ENSMUSP00000020522,10090.ENSMUSP00000020911,10090.ENSMUSP00000021822,10090.ENSMUSP00000022169,10090.ENSMUSP00000022529,10090.ENSMUSP00000025421,10090.ENSMUSP00000026262…	Hk2,Ncan,Slc25a1,Gys1,G6pdx,Cd44,Pgam1,Slc25a11,Galns,Pfkl,Sdc1,Ogn,Hexb,Tkt,Seh1l,Hexa,Nup35,Ext2,B4galt1,Slc2a1,Akr1a1,Slc9a1,Man2b2,Gnpda2,Acan,Xylt1,Lyve1,Man2b1,St3gal2,Pgls,Chst5,St3gal4,Pck2,Chst2,Lum,Hs2st1,Gns,Dsel,Agl,Chst11,Gpc1,Gpi1,Phkb,Nup160,Has2,Cemip,Nup107,Sdc3,B4galt6,Pygl,G6pc3,Eno1,Pgd,Pgm2l1,Ppp1r3c,Hs6st2,Hs6st1,Bcan,Arsb,St3gal1,Slc35d2,Ids,Ugp2,Kera,Dcn,Gaa,Hs3st4,B4galt5…	3.27e-06	0.00053	Metabolism of carbohydrates	29.1667
RCTM	MMU-5683057	84	297	10090	10090.ENSMUSP00000000186,10090.ENSMUSP00000002487,10090.ENSMUSP00000002848,10090.ENSMUSP00000005066,10090.ENSMUSP00000005077,10090.ENSMUSP00000013842,10090.ENSMUSP00000014913,10090.ENSMUSP00000016138,10090.ENSMUSP00000017572,10090.ENSMUSP00000017868,10090.ENSMUSP00000018470,10090.ENSMUSP00000020118,10090.ENSMUSP00000020329,10090.ENSMUSP00000021090,10090.ENSMUSP00000021898,10090.ENSMUSP00000022369…	Fgf23,Braf,Grin2d,Map2k1,Hspb1,Pea15a,Psmb1,Fnta,Psmd11,Etv4,Ywhab,Dusp6,Egfr,Grb2,Shc3,Vcl,Psmc6,Fgf9,Nefl,Gfra2,Angpt1,Pak2,Ppp2r5b,Gfra1,Rgl1,Spred1,Psma7,Nras,Lamtor2,Tln1,Brap,Tgfa,Ret,Pak1,Dusp4,Rasgrf1,Mras,Irs2,Flt3,Mapk6,Zdhhc9,Psme4,Fgf1,Dusp10,Nrtn,Dusp5,Mapk3,Erbb2,Cdc42,Abhd17b,Pik3r1,Cdc42ep2,Kbtbd7,Grin2b,Rap1b,Sos1,Nf1,Actg1,Ptpra,Rac1,Syngap1,Mark3,Ncoa3,Mapk4,Spred2,Shc1,Csf2rb2…	3.28e-06	0.00053	MAPK family signaling cascades	28.2828
Keyword	KW-0968	143	591	10090	10090.ENSMUSP00000000572,10090.ENSMUSP00000000573,10090.ENSMUSP00000000939,10090.ENSMUSP00000001347,10090.ENSMUSP00000003117,10090.ENSMUSP00000003550,10090.ENSMUSP00000003717,10090.ENSMUSP00000004920,10090.ENSMUSP00000005509,10090.ENSMUSP00000005798,10090.ENSMUSP00000007236,10090.ENSMUSP00000008748,10090.ENSMUSP00000009234,10090.ENSMUSP00000009727,10090.ENSMUSP00000010298,10090.ENSMUSP00000017783…	Gabra2,Ovgp1,Hip1r,Rnd2,Ap1m1,Ncstn,Abcb4,Ulk2,Stx1a,Snx6,Syngr3,Ubqln4,Ap1b1,Syngr1,Spire2,Rab11fip4,Gabarap,Cyb561,Snx3,Nts,Nsg2,Srebf1,Rab10,Rab37,Chga,Esd,Clu,Adcy8,Ehd3,Syt4,Ehd1,Nptx1,Cops5,Stom,Dpp7,Serpini1,Snx7,Ift74,Adc,Nsg1,Vps33a,Rab35,Npy,Gabarapl1,Necap1,Slc17a6,Atp6ap2,Ebp,Ist1,Tmem30a,Stoml1,Rab6b,Bsn,Clvs1,Scamp5,Fam91a1,Vezt,Trim36,Abhd2,Copg2,Ptchd2,Brsk1,Ptpn23,Camkv,Nmnat2,Cl…	3.38e-06	7.66e-05	Cytoplasmic vesicle	24.1963
Process	GO:0042176	107	409	10090	10090.ENSMUSP00000000579,10090.ENSMUSP00000000590,10090.ENSMUSP00000001507,10090.ENSMUSP00000001780,10090.ENSMUSP00000002708,10090.ENSMUSP00000008748,10090.ENSMUSP00000009530,10090.ENSMUSP00000016680,10090.ENSMUSP00000017610,10090.ENSMUSP00000019577,10090.ENSMUSP00000019906,10090.ENSMUSP00000019939,10090.ENSMUSP00000020234,10090.ENSMUSP00000020329,10090.ENSMUSP00000020640,10090.ENSMUSP00000020922…	Sox9,Rdx,Cyp51,Akt1,Shh,Ubqln4,Timp1,Cul4a,Timp2,Gipc1,Vip,Snx3,Timp3,Egfr,Gnb2l1,Trib2,Caml,Agtpbp1,Hmgcr,Plk2,Clu,Rb1,Rnf19a,Bag6,Smad4,Rela,Smad7,Cst3,Fam83d,Sec22b,Sdcbp,Rad23b,Vcp,Tnfrsf1b,Adc,Anapc4,N4bp1,Egln1,Pin1,Ldlr,Anxa2,Fbxo22,Gclc,Snx1,Socs5,Hace1,Atp13a2,Usp5,Zdhhc2,Trib3,Bag2,Mgat3,Sgsm3,Cd81,Lrp1,Sf3b3,Senp1,Fbxw8,Mylip,Tiparp,Arel1,Sorl1,Ezr,Atpif1,Gfap,Trib1,Rnf144b,Sirt2,Serpi…	3.41e-06	0.00015	Regulation of protein catabolic process	26.1614
Component	GO:0030055	60	187	10090	10090.ENSMUSP00000000058,10090.ENSMUSP00000000299,10090.ENSMUSP00000000590,10090.ENSMUSP00000002889,10090.ENSMUSP00000003717,10090.ENSMUSP00000005066,10090.ENSMUSP00000006467,10090.ENSMUSP00000009003,10090.ENSMUSP00000015137,10090.ENSMUSP00000021195,10090.ENSMUSP00000022369,10090.ENSMUSP00000023497,10090.ENSMUSP00000026269,10090.ENSMUSP00000026360,10090.ENSMUSP00000027856,10090.ENSMUSP00000028059…	Cav2,Itgb2,Rdx,Flii,Abcb4,Map2k1,Arpc2,Rala,Limk1,Slc6a4,Vcl,Lmln,Limd1,Itgb8,Dcaf6,Rsu1,Itga6,Mapre1,Cpne3,Sdcbp,Tln1,Pak1,Ilk,Rexo2,Lpp,Gak,Cib2,Asap3,Cbl,Senp1,Alkbh6,Mapk3,Flrt3,Itga2,Flrt2,Ezr,Thsd1,Afap1,Capn2,Actg1,Nrap,Ptpra,Mdc1,Itgb1,Sorbs1,Actb,Cttn,Tek,D8Ertd82e,Arhgef7,Flrt1,Peak1,Tes,Cfl1,Palld,Msn,Zyx,Map4k4,Bcar1,Actr3	3.5e-06	6.67e-05	Cell-substrate junction	32.0856
NetworkNeighborAL	CL:18326	47	131	10090	10090.ENSMUSP00000000109,10090.ENSMUSP00000002848,10090.ENSMUSP00000019290,10090.ENSMUSP00000025805,10090.ENSMUSP00000027020,10090.ENSMUSP00000030637,10090.ENSMUSP00000030676,10090.ENSMUSP00000033915,10090.ENSMUSP00000034076,10090.ENSMUSP00000034912,10090.ENSMUSP00000048576,10090.ENSMUSP00000053558,10090.ENSMUSP00000056080,10090.ENSMUSP00000062158,10090.ENSMUSP00000062284,10090.ENSMUSP00000063933…	Cntn1,Grin2d,Cacng2,Cnih2,Gria4,Ncdn,Grik3,Gpm6a,Cbln1,Rasgrf1,Grin3b,Abhd12,Gldn,Lrrc4,Grin2b,Chl1,Nlgn3,Shisa6,Negr1,Ntm,Gria3,Tspan7,Porcn,Lsamp,Homer1,Syngap1,Cacng3,Cntn2,Cntn6,Ank3,Rasgrf2,Prkcg,Epb4.1l1,L1cam,Shank1,Iglon5,Lrfn1,Cntnap2,Grik4,Opcml,Grin2a,Ank1,Lrrtm1,Abhd6,Ncam1,Lrrc4c,Cacng8	3.59e-06	0.0035	Mixed, incl. neurotransmitter receptor complex, and neurexins and neuroligins	35.8779
Process	GO:0099536	103	390	10090	10090.ENSMUSP00000000058,10090.ENSMUSP00000000572,10090.ENSMUSP00000002848,10090.ENSMUSP00000003442,10090.ENSMUSP00000003971,10090.ENSMUSP00000005509,10090.ENSMUSP00000006181,10090.ENSMUSP00000007130,10090.ENSMUSP00000009538,10090.ENSMUSP00000017900,10090.ENSMUSP00000019577,10090.ENSMUSP00000021898,10090.ENSMUSP00000023259,10090.ENSMUSP00000023441,10090.ENSMUSP00000025110,10090.ENSMUSP00000025338…	Cav2,Gabra2,Grin2d,Cacnb3,Lin7b,Stx1a,Napa,Ctnnb1,Syn2,Slc12a7,Gipc1,Shc3,Lynx1,P2rx6,Syt4,Gabbr1,Cnih2,Apba1,Rela,Farp1,Gria4,Snap25,Napb,Gucy1b3,Glrb,Sdcbp,Ppt1,Grik3,Cdk5,Gabrd,Nsg1,Gabrg1,Lrp6,Slc17a6,Fchsd2,Pak1,Stx4a,Plat,Cx3cl1,Clstn1,Grm1,Cplx1,Htr5a,Brsk1,Sncb,Syde1,Pcdh8,Rims4,Dagla,Camk4,Htr2a,Grin3b,Ppp3ca,Syt12,Ric3,Gnai2,Crh,F2r,Grin2b,Gabrg2,Ptprn2,Kcmf1,Nlgn3,Chat,Shisa6,Nf1,Otof,…	3.66e-06	0.00016	Synaptic signaling	26.4103
Process	GO:0030307	61	192	10090	10090.ENSMUSP00000000127,10090.ENSMUSP00000001347,10090.ENSMUSP00000001780,10090.ENSMUSP00000005255,10090.ENSMUSP00000007757,10090.ENSMUSP00000007959,10090.ENSMUSP00000015137,10090.ENSMUSP00000018651,10090.ENSMUSP00000018880,10090.ENSMUSP00000020323,10090.ENSMUSP00000020329,10090.ENSMUSP00000025110,10090.ENSMUSP00000026999,10090.ENSMUSP00000029611,10090.ENSMUSP00000029912,10090.ENSMUSP00000030669…	Wnt3,Rnd2,Akt1,Wisp1,Tgfbr1,Rhoa,Limk1,Trpv2,Ndel1,Avpr1a,Egfr,Syt4,Smad7,Lef1,Sdcbp,Slc9a1,Cd38,Rufy3,Mtpn,Pak1,Ilk,Acsl4,Sfrp1,Ist1,Pin1,Hnrnpk,Sema7a,Exosc2,Cd81,Lrp1,Map3k13,Trpc5,Erbb2,Cdc42,Dscam,Adam10,Ep300,Adnp2,Sema5a,Myo5b,Efna5,Cdkl5,Adnp,Ncoa3,Mmp14,Cacng7,Csnk2a1,Rnf157,Cttn,Rtn4,L1cam,Slc25a33,Plaa,Bcl2,Cfl1,Disc1,Syt2,Sgk1,Derl2,Mllt4,Sh3glb1	3.78e-06	0.00017	Positive regulation of cell growth	31.7708
RCTM	MMU-112315	65	210	10090	10090.ENSMUSP00000000001,10090.ENSMUSP00000000572,10090.ENSMUSP00000002848,10090.ENSMUSP00000003038,10090.ENSMUSP00000003442,10090.ENSMUSP00000003971,10090.ENSMUSP00000005509,10090.ENSMUSP00000009538,10090.ENSMUSP00000019290,10090.ENSMUSP00000020706,10090.ENSMUSP00000021195,10090.ENSMUSP00000022013,10090.ENSMUSP00000022567,10090.ENSMUSP00000022639,10090.ENSMUSP00000023007,10090.ENSMUSP00000024575…	Gnai3,Gabra2,Grin2d,Ap2a2,Cacnb3,Lin7b,Stx1a,Syn2,Cacng2,Adcy1,Slc6a4,Adcy2,Cacna2d3,Nefl,Adcy8,Rps6ka2,Gabbr1,Gnal,Apba1,Slc1a1,Gria4,Snap25,Glrb,Grik3,Aldh2,Camk1,Kcnj2,Cplx1,Prkar2b,Aldh5a1,Arl6ip5,Gng10,Camk4,Gls2,Bzrap1,Gnai2,Kcnj9,Grin2b,Kcnj3,Abat,Gabrg2,Prkcb,Chat,Gnai1,Gria3,Tspan7,Cacng3,Glul,Stxbp1,Camkk1,Gad1,Slc5a7,Gng3,Slc38a1,Prkcg,Epb4.1l1,Gabbr2,Camk2b,Camkk2,Gls,Grik4,Grin2a,Syn…	3.79e-06	0.00053	Transmission across Chemical Synapses	30.9524
Process	GO:0043408	168	723	10090	10090.ENSMUSP00000000058,10090.ENSMUSP00000000122,10090.ENSMUSP00000000186,10090.ENSMUSP00000000193,10090.ENSMUSP00000000305,10090.ENSMUSP00000001780,10090.ENSMUSP00000002487,10090.ENSMUSP00000004673,10090.ENSMUSP00000005066,10090.ENSMUSP00000005218,10090.ENSMUSP00000007130,10090.ENSMUSP00000007757,10090.ENSMUSP00000009143,10090.ENSMUSP00000017590,10090.ENSMUSP00000017610,10090.ENSMUSP00000017799…	Cav2,Ngfr,Fgf23,Ccl2,Tpd52l1,Akt1,Braf,Ndrg2,Map2k1,Cd44,Ctnnb1,Tgfbr1,Bmp7,C1qtnf1,Timp2,Cd40,Sfrp5,Wwc1,Atp6ap1,D17Wsu104e,Dusp6,Ctgf,Timp3,Egfr,Igfbp3,Trib2,Map2k6,Dnajc27,Ccl7,Slc9a3r1,Grb2,Pik3r5,Gadd45g,Hmgcr,F2rl1,Fgf9,Spry2,Ywhaz,Angpt1,Robo1,Sod1,Xdh,Eif2ak2,Spry4,Smad4,Fas,Map4k2,Maged1,Cops5,Tnfrsf11a,Spred1,Ptpn1,Dok5,Fam83d,Lamtor2,Cyr61,Glipr2,Map3k6,Nmnat1,Uchl1,Tgfa,Ret,Ltbr,Rps3,…	3.8e-06	0.00017	Regulation of mapk cascade	23.2365
Process	GO:0033993	196	872	10090	10090.ENSMUSP00000000186,10090.ENSMUSP00000000193,10090.ENSMUSP00000000579,10090.ENSMUSP00000001780,10090.ENSMUSP00000001963,10090.ENSMUSP00000002320,10090.ENSMUSP00000002466,10090.ENSMUSP00000003717,10090.ENSMUSP00000004990,10090.ENSMUSP00000005066,10090.ENSMUSP00000006949,10090.ENSMUSP00000007130,10090.ENSMUSP00000007757,10090.ENSMUSP00000007959,10090.ENSMUSP00000009143,10090.ENSMUSP00000009550…	Fgf23,Ccl2,Sox9,Akt1,Ace,Ppard,Nr2f6,Abcb4,Mapk14,Map2k1,Tph2,Ctnnb1,Tgfbr1,Rhoa,Bmp7,Elk1,Fads1,Endog,Rxrg,Mapkapk2,Cd40,Atp2b1,Ctgf,Ascl1,Avpr1a,Egfr,Adcy1,Srebf1,Sdc1,Cmpk2,Ddx5,Slc6a4,Nme2,Snw1,Fos,Adcy2,Cd180,Nefl,Bcl2l2,Adcy8,Vdr,Ifnar1,Dhh,Calcoco1,Pim1,Abcg1,Eif2ak2,Fas,Ankrd1,Cpt1a,Rela,Kcnk4,Cyp26a1,Prdx3,Scd3,Scd2,Casp1,Tnfrsf11a,Esrrg,Vim,Cat,Crls1,Cst3,Fam210b,Lef1,Lrat,Eif4e,Bcl10,A…	3.82e-06	0.00017	Response to lipid	22.4771
TISSUES	BTO:0000497	61	193	10090	10090.ENSMUSP00000003754,10090.ENSMUSP00000004173,10090.ENSMUSP00000017576,10090.ENSMUSP00000020323,10090.ENSMUSP00000021674,10090.ENSMUSP00000022639,10090.ENSMUSP00000022699,10090.ENSMUSP00000024099,10090.ENSMUSP00000025234,10090.ENSMUSP00000026076,10090.ENSMUSP00000028241,10090.ENSMUSP00000028727,10090.ENSMUSP00000029002,10090.ENSMUSP00000029876,10090.ENSMUSP00000030536,10090.ENSMUSP00000030626…	Calb2,Cdip1,Rbfox3,Avpr1a,Fos,Nefl,Gfra2,Ache,Epb4.1l4a,Gfra1,Stom,Snap25,Stmn2,Calb1,Pink1,Tmem50a,Gabrg1,Uchl1,Rufy3,Npy,Mtpn,Slc17a6,Nucb1,Fam115a,Atp13a2,Arl6ip5,Sncb,Ndn,Nrtn,Sugt1,Slc35f6,Cbfb,Crh,Grin2b,Gabrg2,Gfap,Dnaja4,Chat,Tubb3,Otof,Drd2,Map2,Htt,Frmd3,Sdk1,Glul,Nefh,Chchd2,Gad1,Slc5a7,Tuba1a,Scn9a,Actb,Rtn4,Elavl4,Calm1,Ap1s2,Grin2a,Pigyl,Gng2,Prpf19	4.32e-06	0.0003	Ganglion	31.6062
Process	GO:0051271	87	314	10090	10090.ENSMUSP00000000127,10090.ENSMUSP00000000542,10090.ENSMUSP00000000641,10090.ENSMUSP00000001592,10090.ENSMUSP00000001780,10090.ENSMUSP00000002320,10090.ENSMUSP00000002487,10090.ENSMUSP00000002708,10090.ENSMUSP00000004326,10090.ENSMUSP00000004646,10090.ENSMUSP00000007959,10090.ENSMUSP00000008893,10090.ENSMUSP00000009530,10090.ENSMUSP00000015858,10090.ENSMUSP00000020702,10090.ENSMUSP00000021077…	Wnt3,Acvrl1,Sema4f,Jup,Akt1,Ppard,Braf,Shh,Plxna3,Coro1c,Rhoa,Coro1b,Timp1,Cers2,Igfbp3,Slc9a3r1,Rgcc,Robo1,Cyp1b1,Dpysl3,Fas,Cnih2,Slit1,Acvr1c,Jag1,Spred1,Sema3c,Sema3a,Sema3d,Wasl,Cd9,Nr2f2,Acan,Ilk,Sfrp1,Cx3cl1,Pin1,Fam115a,Scai,Abhd2,Ptpn23,Clic4,Rras,Sema7a,Lrp1,Gadd45a,Thbs1,Dusp10,Hoxa7,Pip5kl1,Nov,Nog,Bmerb1,Arhgdia,Ptprr,Mia3,Sp100,Trib1,Sema5a,Dnaja4,Nf1,Tmod3,Sema3e,Drd2,Stk24,Abr,Ptn…	4.37e-06	0.00019	Negative regulation of cellular component movement	27.707
WikiPathways	WP493	53	158	10090	10090.ENSMUSP00000001780,10090.ENSMUSP00000002487,10090.ENSMUSP00000004990,10090.ENSMUSP00000005066,10090.ENSMUSP00000005077,10090.ENSMUSP00000007757,10090.ENSMUSP00000009550,10090.ENSMUSP00000016672,10090.ENSMUSP00000020118,10090.ENSMUSP00000020329,10090.ENSMUSP00000020949,10090.ENSMUSP00000021090,10090.ENSMUSP00000021514,10090.ENSMUSP00000021674,10090.ENSMUSP00000023467,10090.ENSMUSP00000025691…	Akt1,Braf,Mapk14,Map2k1,Hspb1,Tgfbr1,Elk1,Mapkapk2,Dusp6,Egfr,Map2k6,Grb2,Ppm1a,Fos,Pak2,Fas,Casp1,Acvr1c,Nras,Casp6,Stmn1,Map3k6,Casp9,Pak1,Dusp4,Mras,Mapk6,Map2k4,Gadd45a,Dusp10,Map3k13,Dusp5,Mapk3,Ppp3ca,Cdc42,Cd14,Ptprr,Rap1b,Prkcb,Nf1,Rac1,Mekk4,Zak,Mapk4,Casp3,Jund,Prkcg,Jun,Atf4,Akt3,Mapk10,Nlk,Map4k4	4.49e-06	0.00018	Mapk signaling pathway	33.5443
Process	GO:0010770	60	189	10090	10090.ENSMUSP00000000127,10090.ENSMUSP00000001347,10090.ENSMUSP00000002487,10090.ENSMUSP00000004326,10090.ENSMUSP00000005066,10090.ENSMUSP00000006467,10090.ENSMUSP00000015137,10090.ENSMUSP00000018651,10090.ENSMUSP00000018880,10090.ENSMUSP00000022639,10090.ENSMUSP00000023600,10090.ENSMUSP00000024099,10090.ENSMUSP00000026122,10090.ENSMUSP00000031229,10090.ENSMUSP00000033040,10090.ENSMUSP00000033182…	Wnt3,Rnd2,Braf,Plxna3,Map2k1,Arpc2,Limk1,Trpv2,Ndel1,Nefl,Robo1,Ache,P4hb,Rufy3,Pak1,Ilk,Ist1,S100a10,Ptprf,Ss18l1,Sema7a,Lrp1,Fbxw8,Map3k13,Trpc5,Plxnb2,Cdc42,Dscam,Fbxo31,Has2,Ep300,Sema5a,Myo5b,Tubb2b,Efna5,Numbl,Rac1,Dab2,Cdkl5,Adnp,Snap91,Plxnc1,Slitrk1,Cttn,Rtn4,L1cam,Amigo1,Camk2b,Caprin2,Pias2,Plxna4,Met,Disc1,Sgk1,Mllt4,Tbc1d24,Sh3glb1,Myadm,Plxna1,Actr3	4.61e-06	0.0002	Positive regulation of cell morphogenesis involved in differentiation	31.746
Process	GO:0071417	134	549	10090	10090.ENSMUSP00000000001,10090.ENSMUSP00000000058,10090.ENSMUSP00000000122,10090.ENSMUSP00000000193,10090.ENSMUSP00000000579,10090.ENSMUSP00000001592,10090.ENSMUSP00000001780,10090.ENSMUSP00000003550,10090.ENSMUSP00000004137,10090.ENSMUSP00000004202,10090.ENSMUSP00000005279,10090.ENSMUSP00000005651,10090.ENSMUSP00000005798,10090.ENSMUSP00000006467,10090.ENSMUSP00000006764,10090.ENSMUSP00000006828…	Gnai3,Cav2,Ngfr,Ccl2,Sox9,Jup,Akt1,Ncstn,Gstm7,Dnmt1,Klf5,Por,Snx6,Arpc2,Aprt,Aplp1,Ctnnb1,Gatsl2,Top2b,Ndel1,Hdac2,Eif4ebp2,Egfr,Nsg2,Srebf1,Nampt,Rab10,Slc9a3r1,Grb2,Slc6a4,Ryr2,Bcl2l2,Adcy8,Atp5o,Sod1,Rhoq,Impact,Gnal,Gna14,Rela,Parp1,Vim,Grb14,Ptpn1,Anxa5,Casp6,Lamtor2,Gclm,Nr4a3,Slc9a1,Cdk5,Nsg1,Ipo5,Pak1,Col4a1,Sfrp1,Star,Tmem38a,Zdhhc7,Phip,Gclc,Irs2,Cib2,Pck2,Htr5a,Rragb,Hnrnpk,Pdk2,Trib3…	4.7e-06	0.0002	Cellular response to organonitrogen compound	24.408
Process	GO:1905477	42	112	10090	10090.ENSMUSP00000000193,10090.ENSMUSP00000001548,10090.ENSMUSP00000001780,10090.ENSMUSP00000003442,10090.ENSMUSP00000006467,10090.ENSMUSP00000019290,10090.ENSMUSP00000020329,10090.ENSMUSP00000020640,10090.ENSMUSP00000023048,10090.ENSMUSP00000025399,10090.ENSMUSP00000028241,10090.ENSMUSP00000030814,10090.ENSMUSP00000033040,10090.ENSMUSP00000033075,10090.ENSMUSP00000034832,10090.ENSMUSP00000035083…	Ccl2,Itga3,Akt1,Cacnb3,Arpc2,Cacng2,Egfr,Gnb2l1,Mief1,Pmaip1,Stom,Cdk5,Pak1,Stx4a,Ptpn9,Stac,Fam115a,Zdhhc2,Cd81,Lrp1,Cnst,Erbb2,Arf6,Kcnb1,Cemip,Ezr,Epha3,Pgrmc1,Myo5b,Mff,Itgb1,Ank3,Sorbs1,Ptn,Sqstm1,Ephb2,Cnpy4,Dpp6,Ssh1,Sh3glb1,Kcnj11,Actr3	4.81e-06	0.00021	Positive regulation of protein localization to membrane	37.5
Process	GO:0005975	104	398	10090	10090.ENSMUSP00000000573,10090.ENSMUSP00000000642,10090.ENSMUSP00000001780,10090.ENSMUSP00000002007,10090.ENSMUSP00000002487,10090.ENSMUSP00000003964,10090.ENSMUSP00000004327,10090.ENSMUSP00000004990,10090.ENSMUSP00000005826,10090.ENSMUSP00000011896,10090.ENSMUSP00000020522,10090.ENSMUSP00000022169,10090.ENSMUSP00000022268,10090.ENSMUSP00000023088,10090.ENSMUSP00000023112,10090.ENSMUSP00000023133…	Ovgp1,Hk2,Akt1,Siae,Braf,Gys1,G6pdx,Mapk14,Cs,Pgam1,Pfkl,Hexb,Pdhb,Naga,Pmm1,Ppp1r1a,Glo1,Cpt1a,Hexa,St8sia2,Bpnt1,Ext2,Slc23a2,Fabp5,Serp1,B4galt1,Fuca1,Akr1a1,Prkag2,Man2b2,Ugdh,Gnpda2,Coq2,Abcg2,Ldhb,St8sia1,Dgat2,Man2b1,St3gal2,Pgls,Chst5,St3gal4,Mpi,Gclc,St6galnac5,Pdk3,Pck2,Ppp1ca,Chst2,Pdk2,Hs2st1,Mtmr7,Myof,Neu3,Chst11,Npy1r,Itpk1,Inpp5j,Gpi1,Ptges3,Phkb,Stbd1,Pik3r1,B3galnt1,AI464131,Gdp…	4.86e-06	0.00021	Carbohydrate metabolic process	26.1307
KEGG	mmu04810	65	212	10090	10090.ENSMUSP00000000186,10090.ENSMUSP00000000299,10090.ENSMUSP00000000590,10090.ENSMUSP00000001548,10090.ENSMUSP00000001652,10090.ENSMUSP00000002487,10090.ENSMUSP00000005066,10090.ENSMUSP00000006467,10090.ENSMUSP00000006912,10090.ENSMUSP00000007959,10090.ENSMUSP00000013970,10090.ENSMUSP00000015137,10090.ENSMUSP00000016771,10090.ENSMUSP00000018437,10090.ENSMUSP00000018691,10090.ENSMUSP00000020329…	Fgf23,Itgb2,Rdx,Itga3,Bdkrb2,Braf,Map2k1,Arpc2,Pip4k2a,Rhoa,Pip4k2c,Limk1,Myh9,Pfn1,Pip4k2b,Egfr,Gna13,Pfn4,Vcl,Fgf9,Pak2,Itgb8,Gsn,Itga6,Nras,Slc9a1,Wasl,Pak1,Mras,Vav3,Ppp1ca,Rras,Fgf1,Mapk3,Itga2,Cdc42,Pik3r1,F2r,Vav2,Ezr,Sos1,Ppp1r12a,Rras2,Actg1,Arhgap35,Arpc5,Rac1,Wasf2,Arpc1b,Myl9,Itgb1,Pak6,Actb,Itga4,Fgf3,Arhgef7,Arpc5l,Cfl1,Msn,Ssh1,Pdgfd,Bcar1,Chrm2,Ppp1r12b,Chrm3	4.89e-06	0.0002	Regulation of actin cytoskeleton	30.6604
COMPARTMENTS	GOCC:0008021	59	185	10090	10090.ENSMUSP00000000572,10090.ENSMUSP00000002708,10090.ENSMUSP00000003038,10090.ENSMUSP00000003550,10090.ENSMUSP00000005509,10090.ENSMUSP00000007236,10090.ENSMUSP00000009538,10090.ENSMUSP00000009727,10090.ENSMUSP00000018880,10090.ENSMUSP00000019577,10090.ENSMUSP00000020999,10090.ENSMUSP00000021001,10090.ENSMUSP00000022197,10090.ENSMUSP00000023776,10090.ENSMUSP00000025338,10090.ENSMUSP00000027743…	Gabra2,Shh,Ap2a2,Ncstn,Stx1a,Syngr3,Syn2,Syngr1,Ndel1,Gipc1,Kif3c,Rab10,Scamp1,Slc4a8,Gabbr1,Stx6,Snap25,Anxa5,Sec22b,Ppt1,Stx12,Rab35,Slc2a3,Slc17a6,Bsn,Scamp5,Kcnk9,Brsk1,Npy1r,Lgi3,Cops4,Oprd1,Vti1b,Grin2b,Adam10,Ptprn2,Ptprs,Pi4k2a,Otof,Drd2,Mff,Rph3a,Stx16,Cltb,Slc5a7,Snap91,Grin2a,Disc1,Syt2,Syn3,Rab4a,Rab27b,Mctp1,Snapin,Stxbp5,Sv2c,Prrt2,Sh3glb1,Rab3c	4.9e-06	0.00016	Synaptic vesicle	31.8919
Process	GO:0010038	99	374	10090	10090.ENSMUSP00000000186,10090.ENSMUSP00000001780,10090.ENSMUSP00000002487,10090.ENSMUSP00000002708,10090.ENSMUSP00000003320,10090.ENSMUSP00000003550,10090.ENSMUSP00000005952,10090.ENSMUSP00000006949,10090.ENSMUSP00000014370,10090.ENSMUSP00000015481,10090.ENSMUSP00000015950,10090.ENSMUSP00000017881,10090.ENSMUSP00000019290,10090.ENSMUSP00000020243,10090.ENSMUSP00000020329,10090.ENSMUSP00000020706…	Fgf23,Akt1,Braf,Shh,Eif2b5,Ncstn,Slc30a4,Tph2,Cacybp,Endog,Qdpr,Mmp9,Cacng2,Ascl1,Egfr,Adcy1,Sdc1,Hif1a,Fos,Ryr2,Glud1,Anxa11,Loxl2,Adcy8,Tfrc,Sod1,Xdh,Cuta,Syt4,Fas,Nptx1,Gsn,Cat,Anxa5,Slc25a24,Casp6,Cpne3,Prkaa2,Mtf1,Casp9,Star,Gsta4,Gclc,Tspo,Ppp1ca,Atp13a2,Clic4,Lonp1,Alg2,Thbs1,Cpne2,Pde1c,C1qa,Gpi1,Cpne4,Mapk3,Ppp3ca,Kcna1,Syt12,Cd14,Pam,Abat,Junb,Kcnmb4,Ep300,Cpne8,Drd2,Homer1,Htt,Adam9,Su…	5.16e-06	0.00022	Response to metal ion	26.4706
Process	GO:0007268	91	335	10090	10090.ENSMUSP00000000058,10090.ENSMUSP00000000572,10090.ENSMUSP00000002848,10090.ENSMUSP00000003442,10090.ENSMUSP00000003971,10090.ENSMUSP00000005509,10090.ENSMUSP00000006181,10090.ENSMUSP00000007130,10090.ENSMUSP00000009538,10090.ENSMUSP00000017900,10090.ENSMUSP00000019577,10090.ENSMUSP00000021898,10090.ENSMUSP00000023259,10090.ENSMUSP00000023441,10090.ENSMUSP00000025110,10090.ENSMUSP00000025338…	Cav2,Gabra2,Grin2d,Cacnb3,Lin7b,Stx1a,Napa,Ctnnb1,Syn2,Slc12a7,Gipc1,Shc3,Lynx1,P2rx6,Syt4,Gabbr1,Cnih2,Apba1,Gria4,Snap25,Napb,Glrb,Sdcbp,Ppt1,Grik3,Cdk5,Gabrd,Nsg1,Gabrg1,Lrp6,Slc17a6,Fchsd2,Pak1,Stx4a,Plat,Cx3cl1,Clstn1,Grm1,Cplx1,Htr5a,Brsk1,Sncb,Syde1,Pcdh8,Rims4,Camk4,Htr2a,Grin3b,Ppp3ca,Syt12,Ric3,Crh,Grin2b,Gabrg2,Ptprn2,Nlgn3,Chat,Shisa6,Nf1,Otof,Drd2,Gria3,Rph3a,Rac1,Insyn1,Gjd2,Erc2,St…	5.19e-06	0.00022	Chemical synaptic transmission	27.1642
Keyword	KW-0488	205	926	10090	10090.ENSMUSP00000000305,10090.ENSMUSP00000000543,10090.ENSMUSP00000001319,10090.ENSMUSP00000001347,10090.ENSMUSP00000001566,10090.ENSMUSP00000001809,10090.ENSMUSP00000002303,10090.ENSMUSP00000002487,10090.ENSMUSP00000002840,10090.ENSMUSP00000002848,10090.ENSMUSP00000003320,10090.ENSMUSP00000003386,10090.ENSMUSP00000003451,10090.ENSMUSP00000004202,10090.ENSMUSP00000005077,10090.ENSMUSP00000005826…	Tpd52l1,Grasp,Efnb2,Rnd2,Tubb5,Pabpc1,Rhoc,Braf,Pex6,Grin2d,Eif2b5,Mrpl4,Rnd1,Dnmt1,Hspb1,Cs,Rhoa,Rala,Fsd1,Setdb1,Myh9,Rbfox3,Hist1h2bc,G3bp1,Snx3,Egfr,Ddx5,Rab37,Rab15,Habp4,Dpysl2,Nefm,Nefl,Bmp1,Rb1,Acin1,Adcy8,Samm50,Rhoq,Caskin1,Etf1,Rela,Huwe1,Casp1,Ndufb3,Khdrbs2,Ptp4a1,Strbp,Spred1,Xrn2,Trim33,Nras,Lmna,Cnn3,Vcp,Ift74,Ssbp3,Ptp4a2,Stmn1,Ncdn,Rheb,Cds1,Wasl,Avl9,Ybx3,Prmt8,Fkbp4,Rab30,Rab6…	5.35e-06	0.00012	Methylation	22.1382
COMPARTMENTS	GOCC:0055037	43	117	10090	10090.ENSMUSP00000005256,10090.ENSMUSP00000017783,10090.ENSMUSP00000021001,10090.ENSMUSP00000021285,10090.ENSMUSP00000022197,10090.ENSMUSP00000023486,10090.ENSMUSP00000024829,10090.ENSMUSP00000024860,10090.ENSMUSP00000025684,10090.ENSMUSP00000025875,10090.ENSMUSP00000026896,10090.ENSMUSP00000027693,10090.ENSMUSP00000027743,10090.ENSMUSP00000028755,10090.ENSMUSP00000030698,10090.ENSMUSP00000031009…	Ndrg1,Rab11fip4,Rab10,Stx8,Scamp1,Tfrc,Abcg1,Ehd3,Ehd1,Slc1a1,St8sia2,Rab29,Stx6,Ehd4,Stx12,Nsg1,Avl9,Slc9a9,Ldlr,Cmtm6,Scamp5,Micall2,Zdhhc2,Micall1,Pank1,Neu3,Sh3tc2,Arf6,Abhd17b,Vti1b,Rab11fip5,Vps53,Slc9a7,Myo5b,Rac1,Slc31a1,Slc31a2,Ehd2,Arfgef2,Atp9a,Fzd7,Rab11fip3,Rab4a	5.63e-06	0.00018	Recycling endosome	36.7521
Process	GO:0031329	168	729	10090	10090.ENSMUSP00000000001,10090.ENSMUSP00000000590,10090.ENSMUSP00000000642,10090.ENSMUSP00000001127,10090.ENSMUSP00000001780,10090.ENSMUSP00000001809,10090.ENSMUSP00000002708,10090.ENSMUSP00000004920,10090.ENSMUSP00000005066,10090.ENSMUSP00000006912,10090.ENSMUSP00000008537,10090.ENSMUSP00000008748,10090.ENSMUSP00000009530,10090.ENSMUSP00000011896,10090.ENSMUSP00000013970,10090.ENSMUSP00000015481…	Gnai3,Rdx,Hk2,Poldip2,Akt1,Pabpc1,Shh,Ulk2,Map2k1,Pip4k2a,Carhsp1,Ubqln4,Timp1,Pgam1,Pip4k2c,Endog,Mapkapk2,Timp2,Pip4k2b,Fxr2,Gipc1,Vip,Timp3,Gnb2l1,Btg2,Igfbp3,Srebf1,Nampt,Trib2,Sptlc2,Hif1a,Caml,Agtpbp1,Plk2,Clu,Rb1,Rnf19a,Bag6,Mic1,Dcp2,Cpt1a,Huwe1,Smad7,Casp1,Vim,Cst3,Ptpn1,Sec22b,Sdcbp,Rad23b,Vcp,Prkaa2,Tnfrsf1b,Pink1,Dffa,Nmnat1,Tomm7,Anapc4,Scarb2,Pim2,Hpgd,N4bp1,Ldlr,Anxa2,Fbxo22,Gclc,M…	5.7e-06	0.00024	Regulation of cellular catabolic process	23.0453
COMPARTMENTS	GOCC:0005773	107	415	10090	10090.ENSMUSP00000001963,10090.ENSMUSP00000002007,10090.ENSMUSP00000002100,10090.ENSMUSP00000002885,10090.ENSMUSP00000003550,10090.ENSMUSP00000004173,10090.ENSMUSP00000004396,10090.ENSMUSP00000006235,10090.ENSMUSP00000006912,10090.ENSMUSP00000008748,10090.ENSMUSP00000013970,10090.ENSMUSP00000016400,10090.ENSMUSP00000018691,10090.ENSMUSP00000018711,10090.ENSMUSP00000019962,10090.ENSMUSP00000020537…	Ace,Siae,Tmem25,Epdr1,Ncstn,Cdip1,Atp6v1f,Ctsb,Pip4k2a,Ubqln4,Pip4k2c,Ctsz,Pip4k2b,Gabarap,Cd164,Nsg2,Laptm4a,Stx8,Npc2,Hexb,Anxa11,Cln5,Naga,Sod1,Seh1l,Slc15a3,Hexa,Ifitm3,Tmem192,Abcb6,Itm2c,Dpp7,Sppl2a,Cst3,Lamtor2,Cd1d1,Bcl10,Ppt1,Fuca1,Man2b2,Nsg1,Scarb2,Vps33a,Gabarapl1,Stx4a,Atp6ap2,Man2b1,Ifi30,Pla2g15,Ldlr,Anxa2,Ctsh,Snx1,Atg12,Rragb,Snx2,Atp13a2,Smpd1,Gns,Wipi2,Neu3,Uvrag,Plekhm1,Atp6v0…	5.87e-06	0.00018	Vacuole	25.7831
Component	GO:0005938	88	322	10090	10090.ENSMUSP00000000590,10090.ENSMUSP00000000939,10090.ENSMUSP00000002029,10090.ENSMUSP00000003575,10090.ENSMUSP00000003754,10090.ENSMUSP00000004646,10090.ENSMUSP00000005066,10090.ENSMUSP00000005234,10090.ENSMUSP00000007130,10090.ENSMUSP00000007959,10090.ENSMUSP00000010298,10090.ENSMUSP00000016400,10090.ENSMUSP00000016771,10090.ENSMUSP00000018437,10090.ENSMUSP00000019577,10090.ENSMUSP00000020171…	Rdx,Hip1r,Emd,Tpm4,Calb2,Coro1c,Map2k1,Wdr1,Ctnnb1,Rhoa,Spire2,Ctsz,Myh9,Pfn1,Gipc1,Ctgf,Pfn4,Cap2,Vcl,Rhoq,Mkln1,Gsn,Mapre1,Gucy1b3,Calb1,Slc2a1,Fscn1,Wasl,Mpp1,Anxa2,Bsn,Cib2,Hnrnpk,Exoc3,Plekhh2,Actr1a,Rhov,Fam110c,Eef1a1,Rims4,Fgf1,Myrip,Actr1b,Mtss1l,Pard6b,Eps8,Cdc42se1,Cdc42,Arf6,Rhoj,Ezr,Astn2,Prkcb,Flot2,Myo5b,Gnai1,Hmcn1,Rac1,Eno1,Numa1,Crip2,Fry,Erc2,Cltb,Marcks,Gad1,Actb,Cttn,Dstn,Osb…	6.05e-06	0.00011	Cell cortex	27.3292
Process	GO:0001822	83	298	10090	10090.ENSMUSP00000000579,10090.ENSMUSP00000001319,10090.ENSMUSP00000001548,10090.ENSMUSP00000001963,10090.ENSMUSP00000002708,10090.ENSMUSP00000005218,10090.ENSMUSP00000005532,10090.ENSMUSP00000007130,10090.ENSMUSP00000007757,10090.ENSMUSP00000009143,10090.ENSMUSP00000014447,10090.ENSMUSP00000015791,10090.ENSMUSP00000020911,10090.ENSMUSP00000021550,10090.ENSMUSP00000022921,10090.ENSMUSP00000023610…	Sox9,Efnb2,Itga3,Ace,Shh,Cd44,Nid1,Ctnnb1,Tgfbr1,Bmp7,Glis2,Lama5,Sdc1,Arg2,Angpt1,Adamts1,Bag6,Smad4,Podxl,Smad7,Rdh10,Cat,Jag1,Smad9,Calb1,Casp9,Mmp17,Sec61a1,Ret,Ilk,Sfrp1,Hpgd,Acat1,Ctsh,Six4,Hey1,Foxj1,Hs2st1,Fras1,Pygo1,Prkx,Fgf1,Tiparp,Acta2,Greb1l,Dact2,Pou3f3,Zmpste24,Basp1,Nup160,Nog,Fat4,Has2,Nup107,Smad1,Nf1,Ptpro,Cyp26b1,Sox11,Notch2,Mtss1,Aqp11,Notch3,Agtr2,Klhl3,Wnk4,Ampd2,Tek,Ass1…	6.08e-06	0.00026	Kidney development	27.8523
Component	GO:0005773	135	558	10090	10090.ENSMUSP00000001963,10090.ENSMUSP00000002007,10090.ENSMUSP00000002100,10090.ENSMUSP00000002885,10090.ENSMUSP00000003550,10090.ENSMUSP00000004173,10090.ENSMUSP00000004396,10090.ENSMUSP00000005798,10090.ENSMUSP00000005952,10090.ENSMUSP00000006181,10090.ENSMUSP00000006235,10090.ENSMUSP00000006912,10090.ENSMUSP00000008748,10090.ENSMUSP00000013970,10090.ENSMUSP00000015171,10090.ENSMUSP00000016400…	Ace,Siae,Tmem25,Epdr1,Ncstn,Cdip1,Atp6v1f,Snx6,Slc30a4,Napa,Ctsb,Pip4k2a,Ubqln4,Pip4k2c,Galns,Ctsz,Pip4k2b,Gabarap,Cyb561,Cd164,Nsg2,Laptm4a,Stx8,Chga,Npc2,Hexb,Anxa11,Cln5,Ywhaz,Naga,Dirc2,Ifnar1,Sod1,Mic1,Seh1l,Slc15a3,Hexa,Ifitm3,Tmem192,Abcb6,Itm2c,Arl8a,Dpp7,Cat,Sppl2a,Napb,Cst3,Snx16,Lamtor2,Cd1d1,Bcl10,Nr4a3,Ppt1,Fuca1,Man2b2,Nsg1,Scarb2,Vps33a,Gabarapl1,Stx4a,Atp6ap2,Man2b1,Ifi30,Pla2g15,…	6.32e-06	0.00012	Vacuole	24.1935
KEGG	mmu04510	61	196	10090	10090.ENSMUSP00000000058,10090.ENSMUSP00000001548,10090.ENSMUSP00000001780,10090.ENSMUSP00000002487,10090.ENSMUSP00000005066,10090.ENSMUSP00000007130,10090.ENSMUSP00000007959,10090.ENSMUSP00000009550,10090.ENSMUSP00000015791,10090.ENSMUSP00000016315,10090.ENSMUSP00000020329,10090.ENSMUSP00000021090,10090.ENSMUSP00000021898,10090.ENSMUSP00000022369,10090.ENSMUSP00000023467,10090.ENSMUSP00000026360…	Cav2,Itga3,Akt1,Braf,Map2k1,Ctnnb1,Rhoa,Elk1,Lama5,Lamb3,Egfr,Grb2,Shc3,Vcl,Pak2,Itgb8,Itga6,Thbs3,Tln1,Pak1,Ilk,Col4a1,Rasgrf1,Vav3,Ppp1ca,Lama1,Thbs1,Mapk3,Itga2,Erbb2,Cdc42,Pik3r1,Vav2,Rap1b,Sos1,Capn2,Ppp1r12a,Prkcb,Actg1,Arhgap35,Rac1,Myl9,Itgb1,Shc1,Pak6,Prkcg,Actb,Col4a6,Itga4,Jun,Arhgap5,Akt3,Tnr,Bcl2,Mapk10,Met,Zyx,Pdgfd,Shc2,Bcar1,Ppp1r12b	6.44e-06	0.00024	Focal adhesion	31.1224
COMPARTMENTS	GOCC:0070382	61	196	10090	10090.ENSMUSP00000000572,10090.ENSMUSP00000002708,10090.ENSMUSP00000003038,10090.ENSMUSP00000003550,10090.ENSMUSP00000005509,10090.ENSMUSP00000007236,10090.ENSMUSP00000009538,10090.ENSMUSP00000009727,10090.ENSMUSP00000018880,10090.ENSMUSP00000019577,10090.ENSMUSP00000020999,10090.ENSMUSP00000021001,10090.ENSMUSP00000022197,10090.ENSMUSP00000023776,10090.ENSMUSP00000025110,10090.ENSMUSP00000025338…	Gabra2,Shh,Ap2a2,Ncstn,Stx1a,Syngr3,Syn2,Syngr1,Ndel1,Gipc1,Kif3c,Rab10,Scamp1,Slc4a8,Syt4,Gabbr1,Stx6,Snap25,Anxa5,Sec22b,Ppt1,Stx12,Rab35,Slc2a3,Slc17a6,Rab6a,Bsn,Scamp5,Kcnk9,Brsk1,Npy1r,Lgi3,Cops4,Oprd1,Vti1b,Grin2b,Adam10,Ptprn2,Ptprs,Pi4k2a,Otof,Drd2,Mff,Rph3a,Stx16,Cltb,Slc5a7,Snap91,Grin2a,Disc1,Syt2,Syn3,Rab4a,Rab27b,Mctp1,Snapin,Stxbp5,Sv2c,Prrt2,Sh3glb1,Rab3c	6.44e-06	0.0002	Exocytic vesicle	31.1224
RCTM	MMU-373755	26	52	10090	10090.ENSMUSP00000002303,10090.ENSMUSP00000003451,10090.ENSMUSP00000004326,10090.ENSMUSP00000007959,10090.ENSMUSP00000015137,10090.ENSMUSP00000022629,10090.ENSMUSP00000023467,10090.ENSMUSP00000025379,10090.ENSMUSP00000030187,10090.ENSMUSP00000030714,10090.ENSMUSP00000030814,10090.ENSMUSP00000033040,10090.ENSMUSP00000039900,10090.ENSMUSP00000042150,10090.ENSMUSP00000042211,10090.ENSMUSP00000053897…	Rhoc,Rnd1,Plxna3,Rhoa,Limk1,Dpysl2,Pak2,Dpysl3,Tln1,Sema3a,Cdk5,Pak1,Arhgef11,Rras,Sema7a,Erbb2,Sema5a,Sema3e,Arhgap35,Rac1,Dpysl5,Plxnc1,Crmp1,Plxna4,Met,Plxna1	6.45e-06	0.0008	Semaphorin interactions	50
Function	GO:0016772	189	843	10090	10090.ENSMUSP00000000542,10090.ENSMUSP00000000642,10090.ENSMUSP00000001115,10090.ENSMUSP00000001780,10090.ENSMUSP00000002087,10090.ENSMUSP00000002487,10090.ENSMUSP00000003313,10090.ENSMUSP00000003850,10090.ENSMUSP00000003964,10090.ENSMUSP00000004281,10090.ENSMUSP00000004786,10090.ENSMUSP00000004920,10090.ENSMUSP00000004990,10090.ENSMUSP00000005066,10090.ENSMUSP00000006444,10090.ENSMUSP00000006912…	Acvrl1,Hk2,Grk6,Akt1,Pnck,Braf,Grk5,Itpkc,Gys1,Dyrk2,Polr2e,Ulk2,Mapk14,Map2k1,Tep1,Pip4k2a,Tgfbr1,Pip4k2c,Limk1,Camk1g,Mapkapk2,Pip4k2b,Pank3,Nrbp2,Nuak1,Egfr,Pfkl,Map2k6,Cmpk2,Nme2,Plk2,Lats2,Twf1,Pak2,Rps6ka2,Pkmyt1,Pim1,Eif2ak2,Pigf,Polr2d,Riok3,Rfk,Rps6kb2,Map4k2,Pcyt2,Fn3k,Poll,Crcp,Stk17b,Uck2,Uhmk1,Mastl,Acvr1c,Crls1,Polr3f,Hipk1,Cpne3,Ikbkap,Npr2,Prkaa2,Cmpk1,Pink1,Map3k6,Prkag2,Cdk5,Nmn…	6.49e-06	0.00048	Transferase activity, transferring phosphorus-containing groups	22.4199
Process	GO:0051222	94	352	10090	10090.ENSMUSP00000000193,10090.ENSMUSP00000001592,10090.ENSMUSP00000002029,10090.ENSMUSP00000002320,10090.ENSMUSP00000002708,10090.ENSMUSP00000003442,10090.ENSMUSP00000004990,10090.ENSMUSP00000006467,10090.ENSMUSP00000009157,10090.ENSMUSP00000020312,10090.ENSMUSP00000020329,10090.ENSMUSP00000020640,10090.ENSMUSP00000021514,10090.ENSMUSP00000021530,10090.ENSMUSP00000022185,10090.ENSMUSP00000022322…	Ccl2,Jup,Emd,Ppard,Shh,Cacnb3,Mapk14,Arpc2,Dynll1,Mcu,Egfr,Gnb2l1,Ppm1a,Hif1a,F2rl1,Glud1,Rgcc,Adcy8,Mief1,Abcg1,Pmaip1,Ankrd1,Casp1,Rab29,Stom,Ppid,Serp1,Cdk5,Tomm7,Cd38,Rufy3,Aacs,Camk1,Tnfrsf1a,Ipo5,Pak1,Stx4a,Acsl4,Tmem30a,Scamp5,Fam115a,BC018507,Irs2,Pck2,Ptpn23,Atp13a2,Zdhhc2,Cd81,Lrp1,Camk4,Myrip,Cnst,Gpi1,Erbb2,Cdc42,Arf6,Cd14,Pik3r1,Golph3,Kcnb1,Olfr78,Sorl1,Camk2n1,Slc35d3,Crh,Cemip,Aba…	6.56e-06	0.00027	Positive regulation of protein transport	26.7045
Component	GO:0031256	58	183	10090	10090.ENSMUSP00000000122,10090.ENSMUSP00000000572,10090.ENSMUSP00000000939,10090.ENSMUSP00000004646,10090.ENSMUSP00000005218,10090.ENSMUSP00000006467,10090.ENSMUSP00000007959,10090.ENSMUSP00000018993,10090.ENSMUSP00000020107,10090.ENSMUSP00000020997,10090.ENSMUSP00000022709,10090.ENSMUSP00000023600,10090.ENSMUSP00000025338,10090.ENSMUSP00000026994,10090.ENSMUSP00000030187,10090.ENSMUSP00000030317…	Ngfr,Gabra2,Hip1r,Coro1c,Cd44,Arpc2,Rhoa,Wwc1,Atp2b1,Sh3yl1,Spry2,Robo1,Gabbr1,Unc5a,Tln1,Pdpn,Gabrg1,Tesc,Gabarapl1,Rps3,Pak1,Atp6ap2,Vezt,Jcad,Kcna2,Eef1a1,Pacsin1,Dagla,Oprd1,Mtss1l,Sh3bp1,Eps8,Cdc42,Kcnb1,Mtmr9,Them4,Ezr,Gabrg2,Slc39a6,Shisa6,Map2,Rac1,Cdkl5,Itgb1,Insr,Psd3,Slc12a5,Hcn2,Kcnc3,Atf4,Cntnap2,Thy1,Cfl1,Ank1,Nme1,Macf1,Kcnj11,Cacng8	6.85e-06	0.00013	Leading edge membrane	31.694
Process	GO:0048646	209	952	10090	10090.ENSMUSP00000000095,10090.ENSMUSP00000000127,10090.ENSMUSP00000000193,10090.ENSMUSP00000000542,10090.ENSMUSP00000000579,10090.ENSMUSP00000001319,10090.ENSMUSP00000001548,10090.ENSMUSP00000001562,10090.ENSMUSP00000001780,10090.ENSMUSP00000001963,10090.ENSMUSP00000002708,10090.ENSMUSP00000002889,10090.ENSMUSP00000004208,10090.ENSMUSP00000004990,10090.ENSMUSP00000005066,10090.ENSMUSP00000005073…	Tbx2,Wnt3,Ccl2,Acvrl1,Sox9,Efnb2,Itga3,Tulp3,Akt1,Ace,Shh,Flii,Angptl2,Mapk14,Map2k1,Zp3,Cd44,Wdr1,Klf5,Htra1,Ctnnb1,Tgfbr1,Elk3,Rdh13,Rala,Bmp7,Lamb3,Myh9,Mmp9,Pfn1,Sfrp5,D17Wsu104e,Hdac2,Ctgf,Ccng1,Gna13,Grb2,Hif1a,Agtpbp1,Lats2,Fgf9,Loxl2,Ywhaz,Angpt1,Bcl6,Robo1,Adamts1,Ets2,Faim2,Nus1,Cyp1b1,Smad4,Mmp19,Podxl,Casp1,Rdh10,Sf3b1,Ptpn18,Ext2,Hipk1,Lef1,Thbs3,Apoa1bp,Bcl10,Cyr61,Calb1,Nr4a3,B4gal…	6.89e-06	0.00029	Anatomical structure formation involved in morphogenesis	21.9538
COMPARTMENTS	GOCC:0045121	80	285	10090	10090.ENSMUSP00000000001,10090.ENSMUSP00000000058,10090.ENSMUSP00000000109,10090.ENSMUSP00000000122,10090.ENSMUSP00000000299,10090.ENSMUSP00000002708,10090.ENSMUSP00000004646,10090.ENSMUSP00000007130,10090.ENSMUSP00000007757,10090.ENSMUSP00000008878,10090.ENSMUSP00000020329,10090.ENSMUSP00000021077,10090.ENSMUSP00000021195,10090.ENSMUSP00000022369,10090.ENSMUSP00000022921,10090.ENSMUSP00000023007…	Gnai3,Cav2,Cntn1,Ngfr,Itgb2,Shh,Coro1c,Ctnnb1,Tgfbr1,Gprc5b,Egfr,Slc9a3r1,Slc6a4,Vcl,Angpt1,Adcy8,Cxadr,Faim2,Rhoq,Fas,Slc1a1,Cd55,Stom,Snap25,Lamtor2,Bcl10,Sdcbp,Abca1,Stoml2,Pdpn,Tnfrsf1b,Slc2a1,Ppt1,Slc9a1,Abcg2,Ret,Slc2a3,Tnfrsf1a,Ldlr,Anxa2,Atp1b3,Rragb,Atp1a1,Cbl,Prkcdbp,Myof,Gpc1,Mlc1,Cpe,Trpc5,Mapk3,Slc38a9,Erbb2,Sdpr,Cd14,Gnai2,F2r,Has2,Ezr,Capn2,Flot2,Eno1,Kcnd2,Itgb1,Rraga,Insr,Casp3,E…	7e-06	0.00021	Membrane raft	28.0702
RCTM	MMU-1266738	121	488	10090	10090.ENSMUSP00000000590,10090.ENSMUSP00000001319,10090.ENSMUSP00000001513,10090.ENSMUSP00000001592,10090.ENSMUSP00000001780,10090.ENSMUSP00000002303,10090.ENSMUSP00000003038,10090.ENSMUSP00000003451,10090.ENSMUSP00000003550,10090.ENSMUSP00000004326,10090.ENSMUSP00000004990,10090.ENSMUSP00000005066,10090.ENSMUSP00000005509,10090.ENSMUSP00000006467,10090.ENSMUSP00000007130,10090.ENSMUSP00000007959…	Rdx,Efnb2,Tubb6,Jup,Akt1,Rhoc,Ap2a2,Rnd1,Ncstn,Plxna3,Mapk14,Map2k1,Stx1a,Arpc2,Ctnnb1,Rhoa,Limk1,Mmp9,Pfn1,Cacng2,Ntn4,Egfr,Grb2,Shc3,Dpysl2,Gfra2,Pak2,Robo1,Dpysl3,Smad4,Gfra1,St8sia2,Unc5a,Dok5,Nras,Efna3,Sdcbp,Tln1,Sema3a,Cdk5,Wasl,Ret,Tuba8,Pak1,Col4a1,Vav3,Irs2,Arhgef11,Lgi4,Rras,Sema7a,Rps6ka5,Siah1a,Psenen,Nrtn,Lgi3,Gpc1,Epha10,Tuba1c,Mapk3,Pcsk6,Erbb2,Cdc42,Dscam,Pik3r1,Tubb2a,Grin2b,Vav…	7.23e-06	0.00084	Developmental Biology	24.7951
Component	GO:0055037	57	179	10090	10090.ENSMUSP00000005256,10090.ENSMUSP00000017783,10090.ENSMUSP00000021001,10090.ENSMUSP00000021285,10090.ENSMUSP00000022197,10090.ENSMUSP00000023486,10090.ENSMUSP00000024829,10090.ENSMUSP00000024860,10090.ENSMUSP00000025684,10090.ENSMUSP00000025875,10090.ENSMUSP00000026896,10090.ENSMUSP00000027693,10090.ENSMUSP00000027743,10090.ENSMUSP00000028755,10090.ENSMUSP00000030284,10090.ENSMUSP00000030698…	Ndrg1,Rab11fip4,Rab10,Stx8,Scamp1,Tfrc,Abcg1,Ehd3,Ehd1,Slc1a1,St8sia2,Rab29,Stx6,Ehd4,Rnf11,Stx12,Nsg1,Avl9,Fchsd2,Slc9a9,Ldlr,Cmtm6,Scamp5,Rep15,Fig4,Micall2,Zdhhc2,Micall1,Pank1,Inpp5f,Kcnk1,Mlc1,Sh3tc2,Arf6,Abhd17b,Vti1b,Rab11fip1,Rab11fip5,Sorl1,Vps53,Ackr3,Slc9a7,Myo5b,Rac1,Slc31a1,Slc31a2,Itgb1,Insr,Tuba1a,Ehd2,Arfgef2,Atp9a,Fzd7,Abhd17c,Rab11fip3,Rab4a,Mctp1	7.3e-06	0.00013	Recycling endosome	31.8436
NetworkNeighborAL	CL:24694	25	49	10090	10090.ENSMUSP00000001507,10090.ENSMUSP00000005003,10090.ENSMUSP00000006692,10090.ENSMUSP00000019333,10090.ENSMUSP00000020846,10090.ENSMUSP00000021684,10090.ENSMUSP00000022176,10090.ENSMUSP00000022977,10090.ENSMUSP00000024829,10090.ENSMUSP00000025713,10090.ENSMUSP00000027356,10090.ENSMUSP00000033509,10090.ENSMUSP00000033715,10090.ENSMUSP00000034015,10090.ENSMUSP00000034713,10090.ENSMUSP00000038063…	Cyp51,Lbr,Mvd,Rnf145,Srebf1,Cyp46a1,Hmgcr,Sqle,Abcg1,Tm7sf2,Cyp27a1,Ebp,Nsdhl,Msmo1,Ldlr,Dhcr24,Lss,Mylip,Sigmar1,Sc5d,Mbtps2,Insig1,Ggps1,Hmgcs1,Soat1	7.38e-06	0.006	Sterol metabolism, and ABC-2 type transporter	51.0204
Component	GO:0015629	115	458	10090	10090.ENSMUSP00000000590,10090.ENSMUSP00000001592,10090.ENSMUSP00000002889,10090.ENSMUSP00000003451,10090.ENSMUSP00000003575,10090.ENSMUSP00000003717,10090.ENSMUSP00000003754,10090.ENSMUSP00000004646,10090.ENSMUSP00000005234,10090.ENSMUSP00000005509,10090.ENSMUSP00000006467,10090.ENSMUSP00000008893,10090.ENSMUSP00000016771,10090.ENSMUSP00000018711,10090.ENSMUSP00000020775,10090.ENSMUSP00000021207…	Rdx,Jup,Flii,Rnd1,Tpm4,Abcb4,Calb2,Coro1c,Wdr1,Stx1a,Arpc2,Coro1b,Myh9,Gabarap,Dynll2,Fam101b,Cap2,Vcl,Spry2,Twf1,Rhoq,Dpysl3,Myl6b,Dctn2,Stk17b,Gsn,Snap25,Cnn3,Calb1,Stoml2,Slc2a1,Lurap1,Fscn1,Wasl,Mtpn,Add2,Pak1,Ilk,Klhl2,Topbp1,Sppl2b,Lpp,Cib2,Hnrnpk,Plekhh2,Micall2,Actr1a,Fhod3,Micall1,Eef1a1,Cdc42bpb,Alg2,Sh3pxd2b,Dennd2a,Myrip,Wipf2,Actr1b,Tax1bp3,Acta2,Mtss1l,Ptges3,Mical2,Sh3bp1,Samd14,Ez…	7.49e-06	0.00014	Actin cytoskeleton	25.1092
Process	GO:0032970	101	388	10090	10090.ENSMUSP00000000590,10090.ENSMUSP00000000939,10090.ENSMUSP00000001592,10090.ENSMUSP00000002303,10090.ENSMUSP00000002487,10090.ENSMUSP00000005234,10090.ENSMUSP00000006467,10090.ENSMUSP00000006618,10090.ENSMUSP00000007757,10090.ENSMUSP00000007959,10090.ENSMUSP00000008893,10090.ENSMUSP00000010298,10090.ENSMUSP00000015137,10090.ENSMUSP00000016143,10090.ENSMUSP00000016771,10090.ENSMUSP00000018437…	Rdx,Hip1r,Jup,Rhoc,Braf,Wdr1,Arpc2,Arhgef19,Tgfbr1,Rhoa,Coro1b,Spire2,Limk1,Wasf3,Myh9,Pfn1,Hdac2,Abracl,Ctgf,Pfn4,Grb2,Ryr2,F2rl1,Rgcc,Twf1,Pak2,Arhgap28,Rhoq,Smad4,Ppm1f,Gsn,Gba2,Pdpn,Stmn1,Fscn1,Wasl,Mtpn,Add2,Fchsd2,Pak1,Ilk,Fgf13,Cx3cl1,S100a10,Kcnj2,Plekhh2,Atp1a1,Fhod3,Rhov,Asap3,Lrp1,Sh3pxd2b,Wipf2,Acta2,Sh3bp1,Frmd6,Eps8,Cdc42,Arf6,Pik3r1,Pam,Rhoj,Cdc42ep2,Ppm1e,Arhgdia,Epha3,Ep300,Sema5…	7.56e-06	0.00031	Regulation of actin filament-based process	26.0309
RCTM	MMU-9006934	107	418	10090	10090.ENSMUSP00000000186,10090.ENSMUSP00000001548,10090.ENSMUSP00000001592,10090.ENSMUSP00000001780,10090.ENSMUSP00000002487,10090.ENSMUSP00000003038,10090.ENSMUSP00000003550,10090.ENSMUSP00000004396,10090.ENSMUSP00000004786,10090.ENSMUSP00000004990,10090.ENSMUSP00000005066,10090.ENSMUSP00000005077,10090.ENSMUSP00000007130,10090.ENSMUSP00000007959,10090.ENSMUSP00000015791,10090.ENSMUSP00000016143…	Fgf23,Itga3,Jup,Akt1,Braf,Ap2a2,Ncstn,Atp6v1f,Polr2e,Mapk14,Map2k1,Hspb1,Ctnnb1,Rhoa,Lama5,Wasf3,Lamb3,Mapkapk2,Mmp9,Ywhab,Atp6ap1,Atp6v1e1,Dusp6,Egfr,Grb2,Atp6v1d,Shc3,Fgf9,Spry2,Pak2,Rps6ka2,Polr2d,Nab2,Ptpn18,Spred1,Ptpn1,Nras,Thbs3,Tgfa,Pak1,Col4a1,Dusp4,Plat,Cdh5,Cul5,Vav3,Irs2,Flt3,Egr2,Trib3,Cbl,Rps6ka5,Polr2l,Lama1,Psenen,Thbs1,Fgf1,Dock3,Atp6v0b,Mapk3,Flrt3,Pcsk6,Itga2,Erbb2,Cdc42,Arf6,P…	7.64e-06	0.00084	Signaling by Receptor Tyrosine Kinases	25.5981
Process	GO:0050890	91	339	10090	10090.ENSMUSP00000001548,10090.ENSMUSP00000002487,10090.ENSMUSP00000003550,10090.ENSMUSP00000019906,10090.ENSMUSP00000020040,10090.ENSMUSP00000020288,10090.ENSMUSP00000020329,10090.ENSMUSP00000020692,10090.ENSMUSP00000020706,10090.ENSMUSP00000021195,10090.ENSMUSP00000021530,10090.ENSMUSP00000021674,10090.ENSMUSP00000021898,10090.ENSMUSP00000022176,10090.ENSMUSP00000022212,10090.ENSMUSP00000022322…	Itga3,Braf,Ncstn,Vip,Nts,Eif4ebp2,Egfr,Btg2,Adcy1,Slc6a4,Hif1a,Fos,Shc3,Hmgcr,Plk2,Glud1,Jph4,Adcy8,Pde1b,Asic1,Syt4,Kcnk4,Jph3,Ric8,Casp1,Cln8,Snap25,Slc7a11,Calb1,Ppt1,Cdk5,Pak1,Fgf13,Aff2,Man2b1,St3gal4,Ldlr,Rp9,Tanc1,Brsk1,Prkar2b,Egr2,Mgat3,Ttbk1,Camk4,Cbr3,Htr2a,Gpi1,Amfr,Fzd9,Rcan1,Crh,Nog,Grin2b,Chl1,Nlgn3,Ep300,Chat,Nf1,Nptx2,Pgrmc1,Drd2,Crtc1,En1,Htt,Syngap1,Cntn2,Adnp,Itgb1,Casp3,Pias1…	7.7e-06	0.00032	Cognition	26.8437
Component	GO:0005925	56	175	10090	10090.ENSMUSP00000000058,10090.ENSMUSP00000000299,10090.ENSMUSP00000000590,10090.ENSMUSP00000002889,10090.ENSMUSP00000003717,10090.ENSMUSP00000005066,10090.ENSMUSP00000006467,10090.ENSMUSP00000009003,10090.ENSMUSP00000015137,10090.ENSMUSP00000021195,10090.ENSMUSP00000022369,10090.ENSMUSP00000023497,10090.ENSMUSP00000026269,10090.ENSMUSP00000026360,10090.ENSMUSP00000027856,10090.ENSMUSP00000028059…	Cav2,Itgb2,Rdx,Flii,Abcb4,Map2k1,Arpc2,Rala,Limk1,Slc6a4,Vcl,Lmln,Limd1,Itgb8,Dcaf6,Rsu1,Mapre1,Cpne3,Sdcbp,Tln1,Pak1,Ilk,Rexo2,Lpp,Gak,Asap3,Cbl,Senp1,Alkbh6,Mapk3,Flrt3,Itga2,Flrt2,Ezr,Thsd1,Afap1,Capn2,Actg1,Ptpra,Mdc1,Itgb1,Sorbs1,Actb,Cttn,Tek,D8Ertd82e,Arhgef7,Flrt1,Peak1,Tes,Cfl1,Palld,Msn,Zyx,Map4k4,Bcar1	7.76e-06	0.00014	Focal adhesion	32
Process	GO:1902903	96	364	10090	10090.ENSMUSP00000000590,10090.ENSMUSP00000000939,10090.ENSMUSP00000002303,10090.ENSMUSP00000002487,10090.ENSMUSP00000005234,10090.ENSMUSP00000006467,10090.ENSMUSP00000007757,10090.ENSMUSP00000007959,10090.ENSMUSP00000008893,10090.ENSMUSP00000010298,10090.ENSMUSP00000015137,10090.ENSMUSP00000016143,10090.ENSMUSP00000018437,10090.ENSMUSP00000019911,10090.ENSMUSP00000020171,10090.ENSMUSP00000020741…	Rdx,Hip1r,Rhoc,Braf,Wdr1,Arpc2,Tgfbr1,Rhoa,Coro1b,Spire2,Limk1,Wasf3,Pfn1,Hdac2,Ctgf,Drg1,Pfn4,Grb2,F2rl1,Rgcc,Clu,Rb1,Twf1,Pak2,Arhgap28,Smad4,Ppm1f,Gsn,Mapre1,Stmn2,Gba2,Stmn1,Wasl,Mtpn,Add2,Fkbp4,Fchsd2,Rps3,Pak1,Fgf13,Cx3cl1,Cdh5,Ldlr,S100a10,Plekhh2,Fhod3,Asap3,Sh3pxd2b,Inpp5j,Wipf2,Colgalt1,Sh3bp1,Eps8,Cdc42,Arf6,Pik3r1,Cdc42ep2,Ppm1e,Bmerb1,Ep300,Sema5a,Jmy,Actg1,Tmod3,Arhgap35,Map2,Arpc5,…	8.07e-06	0.00033	Regulation of supramolecular fiber organization	26.3736
Component	GO:0034703	63	207	10090	10090.ENSMUSP00000002848,10090.ENSMUSP00000003442,10090.ENSMUSP00000005509,10090.ENSMUSP00000009875,10090.ENSMUSP00000018614,10090.ENSMUSP00000019290,10090.ENSMUSP00000020312,10090.ENSMUSP00000021750,10090.ENSMUSP00000022543,10090.ENSMUSP00000022567,10090.ENSMUSP00000025805,10090.ENSMUSP00000025908,10090.ENSMUSP00000027020,10090.ENSMUSP00000028727,10090.ENSMUSP00000029624,10090.ENSMUSP00000030676…	Grin2d,Cacnb3,Stx1a,Kcnd1,Kcnab3,Cacng2,Mcu,Ryr2,Micu2,Cacna2d3,Cnih2,Kcnk4,Gria4,Snap25,Ccdc109b,Grik3,Kcnj2,Kcna2,Kcnk1,Kcnh2,Grin3b,Trpc5,Eps8,Abhd12,Unc80,Kcna1,Kcng4,Kcnb1,Kcns3,Grin2b,Scn4b,Kcnj3,Kcnq3,Kcnmb4,Shisa6,Gria3,Scn1a,Porcn,Hspa2,Kcnd2,Scn8a,Cacng3,Sumo1,Cacng7,Scn1b,Hcn2,Scn9a,Cttn,Sestd1,Kcnc3,Shank1,Kcng1,Calm1,Cntnap2,Grik4,Grin2a,Dpp6,Kcnip2,Kcnb2,Abhd6,Kcnip4,Kcnj11,Cacng8	8.23e-06	0.00015	Cation channel complex	30.4348
Component	GO:0008021	71	244	10090	10090.ENSMUSP00000000572,10090.ENSMUSP00000002708,10090.ENSMUSP00000003038,10090.ENSMUSP00000003550,10090.ENSMUSP00000005509,10090.ENSMUSP00000007236,10090.ENSMUSP00000009538,10090.ENSMUSP00000009727,10090.ENSMUSP00000018880,10090.ENSMUSP00000019577,10090.ENSMUSP00000020999,10090.ENSMUSP00000021001,10090.ENSMUSP00000021459,10090.ENSMUSP00000022197,10090.ENSMUSP00000022293,10090.ENSMUSP00000023776…	Gabra2,Shh,Ap2a2,Ncstn,Stx1a,Syngr3,Syn2,Syngr1,Ndel1,Gipc1,Kif3c,Rab10,Rab15,Scamp1,Vdac2,Slc4a8,Gabbr1,Apba1,Cops5,Stx6,Snap25,Anxa5,Sec22b,Ppt1,Stx12,Rab35,Slc2a3,Slc17a6,Stx4a,Bsn,Scamp5,Kcnk9,Brsk1,Npy1r,Lgi3,Cops4,Oprd1,Svop,Syt12,Vti1b,Grin2b,Adam10,Ptprn2,Ptprs,Pi4k2a,Otof,Drd2,Mff,Rph3a,Mctp2,Stx16,Cltb,Slc5a7,Vti1a,Snap91,Hap1,Calm1,Grin2a,Disc1,Syt2,Syn3,Rab4a,Rab27b,Mctp1,Snapin,Stxbp…	8.25e-06	0.00015	Synaptic vesicle	29.0984
Component	GO:0030133	100	384	10090	10090.ENSMUSP00000000058,10090.ENSMUSP00000000572,10090.ENSMUSP00000000573,10090.ENSMUSP00000002708,10090.ENSMUSP00000003038,10090.ENSMUSP00000003550,10090.ENSMUSP00000005509,10090.ENSMUSP00000007236,10090.ENSMUSP00000009538,10090.ENSMUSP00000009727,10090.ENSMUSP00000018880,10090.ENSMUSP00000019577,10090.ENSMUSP00000019734,10090.ENSMUSP00000020040,10090.ENSMUSP00000020846,10090.ENSMUSP00000020999…	Cav2,Gabra2,Ovgp1,Shh,Ap2a2,Ncstn,Stx1a,Syngr3,Syn2,Syngr1,Ndel1,Gipc1,Cyb561,Nts,Srebf1,Kif3c,Rab10,Gosr2,Rab15,Chga,Scamp1,Vdac2,Slc4a8,Syt4,Gabbr1,Apba1,Nptx1,Cops5,Stx6,Snap25,Anxa5,Sec22b,Ppt1,Adc,Stx12,Rab35,Tmem168,Sspn,Slc2a3,Slc17a6,Rab6a,Stx4a,Tmem30a,Bsn,Scamp5,Bloc1s5,BC022687,Kcnk9,Brsk1,Atp13a2,Npy1r,Lgi3,Myrip,Cnst,Cops4,Cpe,Oprd1,Svop,Clrn1,Nrsn1,Syt12,Pam,Vti1b,Rab11fip5,Sorl1,Gr…	8.25e-06	0.00015	Transport vesicle	26.0417
NetworkNeighborAL	CL:12505	41	111	10090	10090.ENSMUSP00000001319,10090.ENSMUSP00000001347,10090.ENSMUSP00000003451,10090.ENSMUSP00000004326,10090.ENSMUSP00000023600,10090.ENSMUSP00000025993,10090.ENSMUSP00000026994,10090.ENSMUSP00000029673,10090.ENSMUSP00000030568,10090.ENSMUSP00000030714,10090.ENSMUSP00000030862,10090.ENSMUSP00000030971,10090.ENSMUSP00000038972,10090.ENSMUSP00000039368,10090.ENSMUSP00000042150,10090.ENSMUSP00000042211…	Efnb2,Rnd2,Rnd1,Plxna3,Robo1,Slit1,Unc5a,Efna3,Sema3c,Sema3a,Draxin,Gpr125,Sdk2,Ptprf,Rras,Sema7a,Epha10,Plxnb2,Lrrc4b,Dscam,Ptprs,Epha3,Epha6,Slit3,Sema5a,Sema3e,Efna5,Ptpra,Plxnc1,Slitrk1,Rtn4,Ephb2,Unc5c,Flrt1,Ephb6,Dcc,Plxna4,Slit2,Sema6b,Plxna1,Omg	8.33e-06	0.006	Axon guidance, and Protein tyrosine phosphatase, catalytic domain	36.9369
COMPARTMENTS	GOCC:0098857	80	287	10090	10090.ENSMUSP00000000001,10090.ENSMUSP00000000058,10090.ENSMUSP00000000109,10090.ENSMUSP00000000122,10090.ENSMUSP00000000299,10090.ENSMUSP00000002708,10090.ENSMUSP00000004646,10090.ENSMUSP00000007130,10090.ENSMUSP00000007757,10090.ENSMUSP00000008878,10090.ENSMUSP00000020329,10090.ENSMUSP00000021077,10090.ENSMUSP00000021195,10090.ENSMUSP00000022369,10090.ENSMUSP00000022921,10090.ENSMUSP00000023007…	Gnai3,Cav2,Cntn1,Ngfr,Itgb2,Shh,Coro1c,Ctnnb1,Tgfbr1,Gprc5b,Egfr,Slc9a3r1,Slc6a4,Vcl,Angpt1,Adcy8,Cxadr,Faim2,Rhoq,Fas,Slc1a1,Cd55,Stom,Snap25,Lamtor2,Bcl10,Sdcbp,Abca1,Stoml2,Pdpn,Tnfrsf1b,Slc2a1,Ppt1,Slc9a1,Abcg2,Ret,Slc2a3,Tnfrsf1a,Ldlr,Anxa2,Atp1b3,Rragb,Atp1a1,Cbl,Prkcdbp,Myof,Gpc1,Mlc1,Cpe,Trpc5,Mapk3,Slc38a9,Erbb2,Sdpr,Cd14,Gnai2,F2r,Has2,Ezr,Capn2,Flot2,Eno1,Kcnd2,Itgb1,Rraga,Insr,Casp3,E…	8.65e-06	0.00026	Membrane microdomain	27.8746
Process	GO:0016197	64	212	10090	10090.ENSMUSP00000004646,10090.ENSMUSP00000005798,10090.ENSMUSP00000014694,10090.ENSMUSP00000017783,10090.ENSMUSP00000019939,10090.ENSMUSP00000020420,10090.ENSMUSP00000020537,10090.ENSMUSP00000021001,10090.ENSMUSP00000021329,10090.ENSMUSP00000022721,10090.ENSMUSP00000023615,10090.ENSMUSP00000024860,10090.ENSMUSP00000025684,10090.ENSMUSP00000027693,10090.ENSMUSP00000027743,10090.ENSMUSP00000028727…	Coro1c,Snx6,Zfyve20,Rab11fip4,Snx3,Ap3d1,Nsg2,Rab10,Gosr2,Cln5,Dscr3,Ehd3,Ehd1,Rab29,Stx6,Snap25,Ehd4,Abca1,Vcp,Leprot,Tmem50a,Stx12,Nsg1,Rab35,Snx8,Rab6a,Mvb12a,Vps26b,Snx1,Cmtm6,Rab6b,Snx2,Washc4,Ptpn23,Micall2,Ap5z1,Micall1,Dennd2a,Ap5m1,Gcc2,Cdc42,Arf6,Vti1b,Vps53,Rab7b,Myo5b,Vps37d,Htt,Ube2o,Stx16,Vps4b,Vti1a,Ehd2,Eps15,Dennd1a,Lrba,Rgp1,Snx18,Lyst,Ap1s2,Dctn1,Tbc1d10b,Rab11fip3,Chmp1b	8.68e-06	0.00036	Endosomal transport	30.1887
Keyword	KW-0342	88	326	10090	10090.ENSMUSP00000000001,10090.ENSMUSP00000001347,10090.ENSMUSP00000001513,10090.ENSMUSP00000001566,10090.ENSMUSP00000002303,10090.ENSMUSP00000003451,10090.ENSMUSP00000007959,10090.ENSMUSP00000009003,10090.ENSMUSP00000020741,10090.ENSMUSP00000020930,10090.ENSMUSP00000020986,10090.ENSMUSP00000021001,10090.ENSMUSP00000021076,10090.ENSMUSP00000021407,10090.ENSMUSP00000021459,10090.ENSMUSP00000022322…	Gnai3,Rnd2,Tubb6,Tubb5,Rhoc,Rnd1,Rhoa,Rala,Drg1,Gna13,Dnajc27,Rab10,Rab37,Srp54a,Rab15,Glud1,Rhobtb2,Rhoq,Gnal,Gna14,Arl8a,Rab29,Nras,Gucy1b3,Rit1,Npr2,Gnl2,Rheb,Rab35,Rasl11a,Tuba8,Rab30,Rab6a,Srpr,Mras,Rab6b,Srprb,Pck2,Rragb,Rhov,Rras,Eef1a1,Mfhas1,Rasl10a,Tuba1c,Rasl11b,Cdc42,Diras2,Arf6,Gnai2,Rabl6,Gimap6,Rhoj,Samhd1,Tubb2a,Rab39,Dnm3,Rab7b,Rap1b,Rab31,Rras2,Tubb3,Gnai1,Tubb2b,Arhgap35,Arl16,…	9.02e-06	0.00019	GTP-binding	26.9939
Process	GO:0098655	154	662	10090	10090.ENSMUSP00000000090,10090.ENSMUSP00000000199,10090.ENSMUSP00000000201,10090.ENSMUSP00000001126,10090.ENSMUSP00000002848,10090.ENSMUSP00000003442,10090.ENSMUSP00000004396,10090.ENSMUSP00000005952,10090.ENSMUSP00000009875,10090.ENSMUSP00000014920,10090.ENSMUSP00000017900,10090.ENSMUSP00000018614,10090.ENSMUSP00000018651,10090.ENSMUSP00000019044,10090.ENSMUSP00000019231,10090.ENSMUSP00000019290…	Cox5a,Ncs1,Nalcn,Slc46a1,Grin2d,Cacnb3,Atp6v1f,Slc30a4,Kcnd1,Nol3,Slc12a7,Kcnab3,Trpv2,Slc22a5,Atp6ap1,Cacng2,Atp6v1e1,Atp2b1,Mcu,Slc22a4,Slc6a4,Atp6v1d,Slc25a29,Ryr2,Sfxn1,Ero1l,Micu2,Cacna2d3,Slc25a17,P2rx6,Tfrc,Atp5o,Asic1,Slc4a8,Slc15a3,Slc1a1,Kcnk4,Gria4,Abcb6,Snap25,Slc23a2,Anxa5,Ccdc109b,Stoml2,Slc9a1,Grik3,Cdk5,Abcg2,Sec61a1,Slc6a6,Slc5a11,Slc9a9,Cox7b,Slc6a8,Gpm6a,Tmem38a,Anxa2,Cox7a2,At…	9.06e-06	0.00037	Cation transmembrane transport	23.2628
Function	GO:0008324	136	568	10090	10090.ENSMUSP00000000090,10090.ENSMUSP00000000199,10090.ENSMUSP00000000201,10090.ENSMUSP00000001126,10090.ENSMUSP00000002848,10090.ENSMUSP00000003442,10090.ENSMUSP00000004396,10090.ENSMUSP00000005952,10090.ENSMUSP00000009875,10090.ENSMUSP00000017900,10090.ENSMUSP00000018614,10090.ENSMUSP00000018651,10090.ENSMUSP00000019044,10090.ENSMUSP00000019290,10090.ENSMUSP00000019354,10090.ENSMUSP00000020107…	Cox5a,Ncs1,Nalcn,Slc46a1,Grin2d,Cacnb3,Atp6v1f,Slc30a4,Kcnd1,Slc12a7,Kcnab3,Trpv2,Slc22a5,Cacng2,Atp6v1e1,Atp2b1,Mcu,Slc22a4,Slc6a4,Atp6v1d,Slc25a29,Ryr2,Sfxn1,Cacna2d3,Slc25a17,P2rx6,Tfrc,Atp5o,Asic1,Slc4a8,Slc15a3,Slc1a1,Kcnk4,Gria4,Snap25,Slc23a2,Anxa5,Slc9a1,Grik3,Cdk5,Abcg2,Sec61a1,Slc6a6,Slc5a11,Slc9a9,Cox7b,Slc6a8,Gpm6a,Tmem38a,Anxa2,Cox7a2,Atp1b3,Slc25a38,Slc25a20,Slc41a2,Slc45a1,Kcnj2,Kc…	9.08e-06	0.00065	Cation transmembrane transporter activity	23.9437
TISSUES	BTO:0000146	90	336	10090	10090.ENSMUSP00000001544,10090.ENSMUSP00000002466,10090.ENSMUSP00000002708,10090.ENSMUSP00000002885,10090.ENSMUSP00000003754,10090.ENSMUSP00000004173,10090.ENSMUSP00000004715,10090.ENSMUSP00000004964,10090.ENSMUSP00000006181,10090.ENSMUSP00000006949,10090.ENSMUSP00000007130,10090.ENSMUSP00000014022,10090.ENSMUSP00000017576,10090.ENSMUSP00000017799,10090.ENSMUSP00000017851,10090.ENSMUSP00000019906…	Vwa5a,Nr2f6,Shh,Epdr1,Calb2,Cdip1,Mospd2,Pou1f1,Napa,Tph2,Ctnnb1,Rnf170,Rbfox3,Cd40,Serinc3,Vip,Slc6a4,Tmx1,Fos,Opn4,Tkt,Nefm,Nefl,Lynx1,Glo1,Gal,Stom,Hsd17b12,Snap25,Chgb,Calb1,Pink1,Uchl1,Fam69a,Rufy3,Npy,Atf7ip,Necap1,Slc17a6,Igsf1,Msmo1,Cul5,Rpusd4,Srprb,Trhr,Fam63b,Scai,Atp13a2,Tecta,Larp6,Mapk6,Irf2bpl,Arl6ip5,Wdr48,Dner,Sncb,Uvrag,Ndn,Spsb1,Mmgt1,Sugt1,Nhlrc3,Zfp697,Lyrm4,Crh,Gfap,Cdc42se2…	9.24e-06	0.00062	Brain stem	26.7857
Keyword	KW-0460	133	553	10090	10090.ENSMUSP00000000001,10090.ENSMUSP00000000542,10090.ENSMUSP00000002848,10090.ENSMUSP00000002891,10090.ENSMUSP00000004281,10090.ENSMUSP00000007757,10090.ENSMUSP00000015481,10090.ENSMUSP00000017629,10090.ENSMUSP00000020107,10090.ENSMUSP00000020217,10090.ENSMUSP00000020522,10090.ENSMUSP00000020706,10090.ENSMUSP00000020930,10090.ENSMUSP00000020959,10090.ENSMUSP00000021217,10090.ENSMUSP00000021514…	Gnai3,Acvrl1,Grin2d,Top3a,Dyrk2,Tgfbr1,Endog,Top2b,Atp2b1,Nudt4,Pfkl,Adcy1,Gna13,Rnaseh1,Nme2,Ppm1a,Adcy2,Tkt,Lats2,Adcy8,Pmm1,Nus1,Pkmyt1,Pim1,Nudt3,Riok3,Gnal,Gna14,Rfk,Hprt,Ctdsp1,Ppm1f,Bpnt1,Fpgs,Acvr1c,Entpd2,Nudt17,Prkaa2,Pink1,Map3k6,Rheb,Nmnat1,Nudt9,Cds1,Fah,Wee1,Acsl4,Acsl1,Atp13a1,Slc41a2,Cib2,Brsk1,Atp13a2,Atp1a1,Slfn8,Ppm1k,Rhov,Oxsr1,Cdc42bpb,Eri3,Dicer1,Slfn9,Itpk1,Srxn1,Gde1,Acsl5…	9.45e-06	0.00019	Magnesium	24.0506
Component	GO:0031966	151	647	10090	10090.ENSMUSP00000000090,10090.ENSMUSP00000000642,10090.ENSMUSP00000003622,10090.ENSMUSP00000004868,10090.ENSMUSP00000005647,10090.ENSMUSP00000006137,10090.ENSMUSP00000008579,10090.ENSMUSP00000011029,10090.ENSMUSP00000014750,10090.ENSMUSP00000015481,10090.ENSMUSP00000015725,10090.ENSMUSP00000016571,10090.ENSMUSP00000018466,10090.ENSMUSP00000020312,10090.ENSMUSP00000020948,10090.ENSMUSP00000020970…	Cox5a,Hk2,Slc25a1,Mtfp1,Ndufs3,Trap1,Rdh13,Dnajc19,Slc25a11,Endog,Bnip1,Ndufa1,Tomm34,Mcu,Abca8b,Rsad2,Nme2,Slc25a29,Sfxn1,Sdha,Vdac2,Glud1,Micu2,Slc25a30,Dnajc15,Clu,Bcl2l2,Ndufb9,Mief1,Samm50,Ndufa6,Atp5o,March5,Agpat4,Eci1,Gabbr1,Cpt1a,Fundc1,Apool,Coq10b,Acadl,Ndufb3,Cyp27a1,Abcb6,Yme1l1,Fpgs,Crat,Ivd,Crls1,Snph,Fam210b,Ptpn1,Slc25a24,Ccdc109b,Stoml2,Cpt2,Pink1,Tomm7,Pmpcb,Coq2,Acads,Abcg2,Tm…	9.56e-06	0.00016	Mitochondrial membrane	23.3385
Component	GO:0060076	31	72	10090	10090.ENSMUSP00000001548,10090.ENSMUSP00000003754,10090.ENSMUSP00000018437,10090.ENSMUSP00000023007,10090.ENSMUSP00000023441,10090.ENSMUSP00000032710,10090.ENSMUSP00000034076,10090.ENSMUSP00000035208,10090.ENSMUSP00000039368,10090.ENSMUSP00000060110,10090.ENSMUSP00000062158,10090.ENSMUSP00000062284,10090.ENSMUSP00000063329,10090.ENSMUSP00000066304,10090.ENSMUSP00000071025,10090.ENSMUSP00000074578…	Itga3,Calb2,Pfn1,Adcy8,P2rx6,Slc17a6,Cbln1,Bsn,Ptprf,Kcnj9,Lrrc4,Grin2b,Kcnj3,Nlgn3,Shisa6,Ntm,Gria3,Scn8a,Cacng3,Cntn6,Snap91,Shank1,Cadm3,Srpx2,Cntnap2,Met,Grin2a,Palld,Grm4,Lrrtm1,Actr3	9.62e-06	0.00016	Excitatory synapse	43.0556
Component	GO:0012506	124	507	10090	10090.ENSMUSP00000000058,10090.ENSMUSP00000000572,10090.ENSMUSP00000000939,10090.ENSMUSP00000001347,10090.ENSMUSP00000003038,10090.ENSMUSP00000003117,10090.ENSMUSP00000003550,10090.ENSMUSP00000004920,10090.ENSMUSP00000005509,10090.ENSMUSP00000007236,10090.ENSMUSP00000009003,10090.ENSMUSP00000009234,10090.ENSMUSP00000009538,10090.ENSMUSP00000009727,10090.ENSMUSP00000010298,10090.ENSMUSP00000019577…	Cav2,Gabra2,Hip1r,Rnd2,Ap2a2,Ap1m1,Ncstn,Ulk2,Stx1a,Syngr3,Rala,Ap1b1,Syn2,Syngr1,Spire2,Gipc1,Cyb561,Nsg2,Srebf1,Rab10,Grb2,Gosr2,Ryr2,Scamp1,Adcy8,Syt4,Pnliprp2,Stx6,Sec22b,Snx7,Stx12,Cd38,Nsg1,Scarb2,Rab35,Sec61a1,Gabarapl1,Slc2a3,Necap1,Slc17a6,Tmem30a,Bsn,Scamp5,BC022687,Abhd2,Copg2,Ptchd2,Exoc3,Atp13a2,Camkv,Nmnat2,Clic4,Zdhhc17,Pacsin1,Myof,Abca3,Gde1,Myrip,Cpe,Oprd1,Svop,Lamp2,Syt12,Pam,V…	9.69e-06	0.00016	Vesicle membrane	24.4576
Process	GO:0006605	64	213	10090	10090.ENSMUSP00000002840,10090.ENSMUSP00000009727,10090.ENSMUSP00000011029,10090.ENSMUSP00000018466,10090.ENSMUSP00000018470,10090.ENSMUSP00000019290,10090.ENSMUSP00000019577,10090.ENSMUSP00000020182,10090.ENSMUSP00000020420,10090.ENSMUSP00000021329,10090.ENSMUSP00000021407,10090.ENSMUSP00000022590,10090.ENSMUSP00000022894,10090.ENSMUSP00000023071,10090.ENSMUSP00000023112,10090.ENSMUSP00000026607…	Pex6,Syngr1,Dnajc19,Tomm34,Ywhab,Cacng2,Gipc1,Pex7,Ap3d1,Gosr2,Srp54a,Dnajc15,Ywhaz,Samm50,Pmm1,Chm,Snx16,Sec62,Ssr3,Zdhhc21,Tomm7,Pmpcb,Scarb2,Sec61a1,Timm17b,Zdhhc7,Srpr,Zdhhc1,Zdhhc2,Micall1,Zdhhc9,Mon1b,Nacad,Arxes2,Lamp2,Gcc2,Vti1b,Timm29,Sorl1,Arxes1,Mipep,Ywhae,Vps41,Vps37d,Pmpca,Vps13c,Mff,Timm17a,Cacng3,Aqp11,Ppp1r3c,Pex26,Zdhhc14,Naca,Zdhhc22,Vti1a,Hap1,Pex14,Sec61a2,Golga7,Macf1,Os9,To…	9.82e-06	0.0004	Protein targeting	30.0469
Process	GO:0050801	177	786	10090	10090.ENSMUSP00000000058,10090.ENSMUSP00000000122,10090.ENSMUSP00000000186,10090.ENSMUSP00000000193,10090.ENSMUSP00000000199,10090.ENSMUSP00000001652,10090.ENSMUSP00000002848,10090.ENSMUSP00000003442,10090.ENSMUSP00000003754,10090.ENSMUSP00000004137,10090.ENSMUSP00000005952,10090.ENSMUSP00000014920,10090.ENSMUSP00000015486,10090.ENSMUSP00000017590,10090.ENSMUSP00000017799,10090.ENSMUSP00000017900…	Cav2,Ngfr,Fgf23,Ccl2,Ncs1,Bdkrb2,Grin2d,Cacnb3,Calb2,Gstm7,Slc30a4,Nol3,Xk,C1qtnf1,Cd40,Slc12a7,Trpv2,Atp6ap1,Atp2b1,Mcu,Avpr1a,Egfr,Ap3d1,Gnb2l1,Gna13,Slc9a3r1,Ppp2r3c,Hif1a,Chga,Ryr2,Hexb,F2rl1,Ero1l,Micu2,Cln5,Adcy8,Vdr,Tfrc,Sod1,Slc4a8,Abcg1,Smad4,Iscu,Smad7,Parp1,Slc7a11,Ccdc109b,Gclm,Calb1,Abca1,Stoml2,Prkaa2,Ppt1,Slc9a1,Cdk5,Cd38,Tesc,Vps33a,Pde6b,Lrp6,Dgat2,Cckbr,Atp6ap2,Slc9a9,Abcb7,Cx3c…	1.02e-05	0.00041	Ion homeostasis	22.5191
NetworkNeighborAL	CL:12506	34	84	10090	10090.ENSMUSP00000001319,10090.ENSMUSP00000001347,10090.ENSMUSP00000003451,10090.ENSMUSP00000004326,10090.ENSMUSP00000023600,10090.ENSMUSP00000025993,10090.ENSMUSP00000026994,10090.ENSMUSP00000029673,10090.ENSMUSP00000030568,10090.ENSMUSP00000030714,10090.ENSMUSP00000030862,10090.ENSMUSP00000030971,10090.ENSMUSP00000038972,10090.ENSMUSP00000042150,10090.ENSMUSP00000042211,10090.ENSMUSP00000050810…	Efnb2,Rnd2,Rnd1,Plxna3,Robo1,Slit1,Unc5a,Efna3,Sema3c,Sema3a,Draxin,Gpr125,Sdk2,Rras,Sema7a,Epha10,Plxnb2,Dscam,Epha3,Epha6,Slit3,Sema5a,Sema3e,Efna5,Plxnc1,Ephb2,Unc5c,Flrt1,Ephb6,Dcc,Plxna4,Slit2,Sema6b,Plxna1	1.05e-05	0.0064	Axon guidance, and Basigin-like	40.4762
COMPARTMENTS	GOCC:0043209	35	88	10090	10090.ENSMUSP00000000109,10090.ENSMUSP00000000590,10090.ENSMUSP00000005256,10090.ENSMUSP00000021217,10090.ENSMUSP00000022638,10090.ENSMUSP00000022639,10090.ENSMUSP00000023707,10090.ENSMUSP00000028239,10090.ENSMUSP00000028727,10090.ENSMUSP00000029071,10090.ENSMUSP00000030164,10090.ENSMUSP00000031131,10090.ENSMUSP00000033075,10090.ENSMUSP00000034756,10090.ENSMUSP00000039657,10090.ENSMUSP00000041347…	Cntn1,Rdx,Ndrg1,Nme2,Nefm,Nefl,Sod1,Gsn,Snap25,Car13,Vcp,Uchl1,Stx4a,Anxa2,Atp1a1,Ina,Serinc5,Erbb2,Cdc42,Arf6,Ezr,Gfap,Sirt2,Glul,Cntn2,Itgb1,Nefh,Actb,Rtn4,Calm1,Bcl2,Thy1,Msn,Ncam1,Omg	1.06e-05	0.00031	Myelin sheath	39.7727
Function	GO:0004674	109	432	10090	10090.ENSMUSP00000000542,10090.ENSMUSP00000001115,10090.ENSMUSP00000001780,10090.ENSMUSP00000002087,10090.ENSMUSP00000002487,10090.ENSMUSP00000003313,10090.ENSMUSP00000004281,10090.ENSMUSP00000004920,10090.ENSMUSP00000004990,10090.ENSMUSP00000005066,10090.ENSMUSP00000007757,10090.ENSMUSP00000015137,10090.ENSMUSP00000016323,10090.ENSMUSP00000016672,10090.ENSMUSP00000019516,10090.ENSMUSP00000020220…	Acvrl1,Grk6,Akt1,Pnck,Braf,Grk5,Dyrk2,Ulk2,Mapk14,Map2k1,Tgfbr1,Limk1,Camk1g,Mapkapk2,Nrbp2,Nuak1,Map2k6,Nme2,Plk2,Lats2,Pak2,Rps6ka2,Pkmyt1,Pim1,Eif2ak2,Riok3,Rps6kb2,Map4k2,Stk17b,Uhmk1,Mastl,Acvr1c,Hipk1,Cpne3,Prkaa2,Pink1,Map3k6,Prkag2,Cdk5,Camk1,Pak1,Ilk,Pim2,Dstyk,Prkab2,Pdk3,Gak,Camk1d,Bmp2k,Brsk1,Mapk6,Camkv,Map2k4,Pdk2,Map3k9,Oxsr1,Cdc42bpb,Rps6ka5,Ttbk1,Pim3,Prkx,Camk4,Map3k13,Ick,Nek9,…	1.07e-05	0.00075	Protein serine/threonine kinase activity	25.2315
Process	GO:0043254	110	437	10090	10090.ENSMUSP00000000579,10090.ENSMUSP00000000590,10090.ENSMUSP00000000939,10090.ENSMUSP00000002303,10090.ENSMUSP00000005509,10090.ENSMUSP00000006181,10090.ENSMUSP00000006467,10090.ENSMUSP00000007959,10090.ENSMUSP00000008893,10090.ENSMUSP00000010298,10090.ENSMUSP00000014920,10090.ENSMUSP00000016143,10090.ENSMUSP00000018437,10090.ENSMUSP00000020640,10090.ENSMUSP00000020741,10090.ENSMUSP00000020967…	Sox9,Rdx,Hip1r,Rhoc,Stx1a,Napa,Arpc2,Rhoa,Coro1b,Spire2,Nol3,Wasf3,Pfn1,Gnb2l1,Drg1,Pfn4,Grb2,Ppm1a,Vdac2,Psmc6,Dnajc15,Clu,Twf1,Tfrc,Arhgap28,Eif2ak2,Riok3,Impact,Fas,Ppp2r5b,Parp1,Gsn,Napb,Mapre1,Stmn2,Abca1,Vcp,Gba2,Pink1,Stmn1,Fscn1,Wasl,Mtpn,Add2,Atf7ip,Fkbp4,Fchsd2,Rps3,Pak1,Cdh5,Trhr,Zdhhc1,BC018507,Fhod3,Ttbk1,Inpp5j,Wipf2,Oprd1,Lamp2,Eps8,Cdc42,Arf6,Sorl1,Cdc42ep2,Rap1b,Ep300,Jmy,Tmod3,V…	1.07e-05	0.00043	Regulation of protein-containing complex assembly	25.1716
Function	GO:0003924	76	270	10090	10090.ENSMUSP00000000001,10090.ENSMUSP00000001347,10090.ENSMUSP00000001513,10090.ENSMUSP00000001566,10090.ENSMUSP00000002303,10090.ENSMUSP00000003451,10090.ENSMUSP00000007959,10090.ENSMUSP00000009003,10090.ENSMUSP00000020741,10090.ENSMUSP00000020930,10090.ENSMUSP00000020986,10090.ENSMUSP00000021001,10090.ENSMUSP00000021076,10090.ENSMUSP00000021407,10090.ENSMUSP00000021459,10090.ENSMUSP00000022665…	Gnai3,Rnd2,Tubb6,Tubb5,Rhoc,Rnd1,Rhoa,Rala,Drg1,Gna13,Dnajc27,Rab10,Rab37,Srp54a,Rab15,Rhobtb2,Rhoq,Gnal,Gna14,Rab29,Nras,Rit1,Rheb,Rab35,Rasl11a,Tuba8,Rab30,Rab6a,Srpr,Mras,Rab6b,Rragb,Tsr1,Rhov,Rras,Eef1a1,Gng10,Rasl10a,Tuba1c,Rasl11b,Cdc42,Diras2,Arf6,Gnai2,Rhoj,Tubb2a,Rab39,Dnm3,Rab7b,Rap1b,Rab31,Rras2,Tubb3,Gnai1,Tubb2b,Arhgap35,Gfm1,Tuba1b,Rac1,Gnl1,Guf1,Gch1,Rraga,Gng3,Tuba1a,Gem,Arhgap5,R…	1.08e-05	0.00075	GTPase activity	28.1481
COMPARTMENTS	GOCC:0005764	88	328	10090	10090.ENSMUSP00000001963,10090.ENSMUSP00000002007,10090.ENSMUSP00000002100,10090.ENSMUSP00000002885,10090.ENSMUSP00000003550,10090.ENSMUSP00000004173,10090.ENSMUSP00000006235,10090.ENSMUSP00000006912,10090.ENSMUSP00000016400,10090.ENSMUSP00000018711,10090.ENSMUSP00000019962,10090.ENSMUSP00000020537,10090.ENSMUSP00000020909,10090.ENSMUSP00000021285,10090.ENSMUSP00000021668,10090.ENSMUSP00000022169…	Ace,Siae,Tmem25,Epdr1,Ncstn,Cdip1,Ctsb,Pip4k2a,Ctsz,Gabarap,Cd164,Nsg2,Laptm4a,Stx8,Npc2,Hexb,Anxa11,Cln5,Naga,Sod1,Seh1l,Slc15a3,Hexa,Ifitm3,Tmem192,Abcb6,Itm2c,Dpp7,Sppl2a,Cst3,Lamtor2,Cd1d1,Bcl10,Ppt1,Fuca1,Man2b2,Nsg1,Scarb2,Vps33a,Atp6ap2,Man2b1,Ifi30,Pla2g15,Ldlr,Anxa2,Ctsh,Snx1,Rragb,Snx2,Atp13a2,Smpd1,Gns,Neu3,Uvrag,Plekhm1,Slc2a6,Rnf152,Slc38a9,Lamp2,Lipa,Vti1b,Slc35f6,Grin2b,Gfap,Rab7b,…	1.1e-05	0.00032	Lysosome	26.8293
Process	GO:0048639	64	214	10090	10090.ENSMUSP00000000095,10090.ENSMUSP00000000127,10090.ENSMUSP00000001347,10090.ENSMUSP00000001780,10090.ENSMUSP00000002320,10090.ENSMUSP00000004964,10090.ENSMUSP00000004990,10090.ENSMUSP00000005073,10090.ENSMUSP00000005255,10090.ENSMUSP00000014743,10090.ENSMUSP00000015137,10090.ENSMUSP00000018651,10090.ENSMUSP00000018880,10090.ENSMUSP00000022545,10090.ENSMUSP00000024811,10090.ENSMUSP00000025110…	Tbx2,Wnt3,Rnd2,Akt1,Ppard,Pou1f1,Mapk14,Zp3,Wisp1,Csf1,Limk1,Trpv2,Ndel1,Fgf9,Pim1,Syt4,Smad7,Serp1,Rufy3,Ybx3,Pak1,Ilk,Sash3,Ist1,Pin1,Ppib,Flt3,Hnrnpk,Sema7a,Lrp1,Sh3pxd2b,Map3k13,Trpc5,Zfpm2,Dscam,Ezr,Ep300,Sema5a,Yap1,Celf1,Myo5b,Drd2,Efna5,Atp8a2,Hopx,Cdkl5,Adnp,Insr,Naca,Cacng7,Rnf157,Cttn,Acacb,Rtn4,L1cam,Plaa,Bcl2,Disc1,Syt2,Erbb4,Mllt4,Sh3glb1,Ncam1,Pou3f2	1.11e-05	0.00045	Positive regulation of developmental growth	29.9065
Component	GO:0005912	52	160	10090	10090.ENSMUSP00000000590,10090.ENSMUSP00000001319,10090.ENSMUSP00000001592,10090.ENSMUSP00000003451,10090.ENSMUSP00000003971,10090.ENSMUSP00000005256,10090.ENSMUSP00000007130,10090.ENSMUSP00000016771,10090.ENSMUSP00000022369,10090.ENSMUSP00000023334,10090.ENSMUSP00000023509,10090.ENSMUSP00000023572,10090.ENSMUSP00000026269,10090.ENSMUSP00000026999,10090.ENSMUSP00000028135,10090.ENSMUSP00000028522…	Rdx,Efnb2,Jup,Rnd1,Lin7b,Ndrg1,Ctnnb1,Myh9,Vcl,Pvrl3,Klhl24,Cxadr,Limd1,Smad7,Fam129b,Itga6,Jag1,Sdcbp,Tln1,Cdh5,Pvrl1,Cdh6,Vezt,Jcad,Ppp1ca,Tspan33,Igsf21,Sh3bp1,Adam10,Pdlim1,Cdh24,Flot2,Synm,Hmcn1,Cdh12,Cdh11,Efna5,Cd99l2,Mtss1,Itgb1,Sorbs1,Actb,Tbcd,Ajap1,Ssx2ip,Cdc42ep4,Shroom1,Nf2,Cyth3,Cdh13,Mllt4,Zyx	1.13e-05	0.00019	Adherens junction	32.5
Component	GO:0005740	160	697	10090	10090.ENSMUSP00000000090,10090.ENSMUSP00000000642,10090.ENSMUSP00000003622,10090.ENSMUSP00000004868,10090.ENSMUSP00000005647,10090.ENSMUSP00000006137,10090.ENSMUSP00000008579,10090.ENSMUSP00000011029,10090.ENSMUSP00000014750,10090.ENSMUSP00000015481,10090.ENSMUSP00000015725,10090.ENSMUSP00000016401,10090.ENSMUSP00000016571,10090.ENSMUSP00000018466,10090.ENSMUSP00000020312,10090.ENSMUSP00000020948…	Cox5a,Hk2,Slc25a1,Mtfp1,Ndufs3,Trap1,Rdh13,Dnajc19,Slc25a11,Endog,Bnip1,Slmo2,Ndufa1,Tomm34,Mcu,Abca8b,Rsad2,Adap2,Nme2,Slc25a29,Sfxn1,Sdha,Vdac2,Glud1,Micu2,Slc25a30,Dnajc15,Clu,Bcl2l2,Ndufb9,Mief1,Samm50,Ndufa6,Atp5o,Sod1,March5,Agpat4,Eci1,Gabbr1,Cpt1a,Fundc1,Apool,Coq10b,Acadl,Ndufb3,Cyp27a1,Abcb6,Yme1l1,Fpgs,Crat,Cat,Ivd,Crls1,Snph,Fam210b,Ptpn1,Slc25a24,Ccdc109b,Stoml2,Cpt2,Pink1,Tomm7,Pmpc…	1.13e-05	0.00019	Mitochondrial envelope	22.9555
Process	GO:1902532	123	504	10090	10090.ENSMUSP00000001548,10090.ENSMUSP00000001652,10090.ENSMUSP00000001780,10090.ENSMUSP00000002284,10090.ENSMUSP00000002572,10090.ENSMUSP00000003313,10090.ENSMUSP00000004137,10090.ENSMUSP00000004281,10090.ENSMUSP00000004673,10090.ENSMUSP00000005066,10090.ENSMUSP00000005077,10090.ENSMUSP00000005218,10090.ENSMUSP00000005647,10090.ENSMUSP00000006137,10090.ENSMUSP00000006828,10090.ENSMUSP00000007959…	Itga3,Bdkrb2,Akt1,Plaur,Slc9a3r2,Grk5,Gstm7,Dyrk2,Ndrg2,Map2k1,Hspb1,Cd44,Ndufs3,Trap1,Aplp1,Rhoa,Bmp7,Nol3,Gatsl2,Timp2,Mmp9,Sfrp5,Wwc1,Hdac2,Dusp6,Timp3,Gnb2l1,Slc9a3r1,Sec14l1,Ppm1a,Hif1a,Hmgcr,F2rl1,Vdac2,Clu,Spry2,Bcl2l2,Bcl6,Rrn3,Ivns1abp,Xdh,Riok3,Spry4,Smad4,Rela,Limd1,Spred1,Ptpn1,Prkaa2,Txndc12,Pink1,Stmn1,Uchl1,Ybx3,Ddias,Ndufc2,Nono,Dusp4,Sfrp1,Egln1,Pin1,Scai,Phlda3,Smpd1,Mcl1,Thbs1,…	1.14e-05	0.00046	Negative regulation of intracellular signal transduction	24.4048
Component	GO:0005764	114	458	10090	10090.ENSMUSP00000001963,10090.ENSMUSP00000002007,10090.ENSMUSP00000002100,10090.ENSMUSP00000002885,10090.ENSMUSP00000003550,10090.ENSMUSP00000004173,10090.ENSMUSP00000005798,10090.ENSMUSP00000005952,10090.ENSMUSP00000006235,10090.ENSMUSP00000015171,10090.ENSMUSP00000016400,10090.ENSMUSP00000018711,10090.ENSMUSP00000019734,10090.ENSMUSP00000019962,10090.ENSMUSP00000020537,10090.ENSMUSP00000020909…	Ace,Siae,Tmem25,Epdr1,Ncstn,Cdip1,Snx6,Slc30a4,Ctsb,Galns,Ctsz,Gabarap,Cyb561,Cd164,Nsg2,Laptm4a,Stx8,Chga,Npc2,Hexb,Anxa11,Cln5,Ywhaz,Naga,Dirc2,Ifnar1,Sod1,Mic1,Seh1l,Slc15a3,Hexa,Ifitm3,Tmem192,Itm2c,Arl8a,Dpp7,Cat,Sppl2a,Cst3,Snx16,Lamtor2,Cd1d1,Bcl10,Nr4a3,Ppt1,Fuca1,Man2b2,Nsg1,Scarb2,Vps33a,Atp6ap2,Man2b1,Ifi30,Pla2g15,Ldlr,Anxa2,Ctsh,Snx1,Sppl2b,Rragb,Snx2,Atp13a2,March9,Cbl,Smpd1,Wdr48,G…	1.14e-05	0.00019	Lysosome	24.8908
Process	GO:0048514	109	433	10090	10090.ENSMUSP00000000095,10090.ENSMUSP00000000193,10090.ENSMUSP00000000542,10090.ENSMUSP00000001319,10090.ENSMUSP00000001780,10090.ENSMUSP00000001963,10090.ENSMUSP00000002708,10090.ENSMUSP00000004208,10090.ENSMUSP00000004990,10090.ENSMUSP00000005279,10090.ENSMUSP00000007130,10090.ENSMUSP00000007757,10090.ENSMUSP00000008542,10090.ENSMUSP00000016771,10090.ENSMUSP00000019723,10090.ENSMUSP00000020171…	Tbx2,Ccl2,Acvrl1,Efnb2,Akt1,Ace,Shh,Angptl2,Mapk14,Klf5,Ctnnb1,Tgfbr1,Elk3,Myh9,D17Wsu104e,Ctgf,Gna13,Hif1a,Fgf9,Loxl2,Ywhaz,Angpt1,Robo1,Nus1,Cyp1b1,Slc1a1,Itgb8,Mmp19,Smad7,Jag1,Spred1,Lef1,Apoa1bp,Cyr61,B4galt1,Tgfa,Nr2f2,Gpr124,Col4a1,Hpgd,Cx3cl1,Mcam,Ldlr,Anxa2,Vav3,Hey1,Fzd8,Thsd7a,Clic4,Dicer1,Lama1,Lrp1,Thbs1,Prkx,Fgf1,AF529169,Tiparp,Gbx2,Hoxa7,Zfpm2,Nov,Cdc42,Rhoj,Shb,Nog,Has2,Vav2,Pik3…	1.17e-05	0.00047	Blood vessel morphogenesis	25.1732
Process	GO:0032870	121	494	10090	10090.ENSMUSP00000000058,10090.ENSMUSP00000000186,10090.ENSMUSP00000000193,10090.ENSMUSP00000000590,10090.ENSMUSP00000001780,10090.ENSMUSP00000002320,10090.ENSMUSP00000002466,10090.ENSMUSP00000004968,10090.ENSMUSP00000005651,10090.ENSMUSP00000006235,10090.ENSMUSP00000006764,10090.ENSMUSP00000007130,10090.ENSMUSP00000007959,10090.ENSMUSP00000009143,10090.ENSMUSP00000015987,10090.ENSMUSP00000018880…	Cav2,Fgf23,Ccl2,Rdx,Akt1,Ppard,Nr2f6,Plod3,Por,Ctsb,Aprt,Ctnnb1,Rhoa,Bmp7,Rxrg,Ndel1,Atp2b1,Eif4ebp2,Avpr1a,Egfr,Lgr5,Srebf1,Rab10,Ddx5,Grb2,Fos,Lats2,Adcy8,Vdr,Calcoco1,Rhoq,Rela,Parp1,Esrrg,Grb14,Ptpn1,Anxa5,Lef1,Gclm,Eif4e,Nr4a3,Ugcg,Prkaa2,Slc9a1,Casp9,Fkbp4,Nr2f2,Pak1,Sfrp1,Star,Acsl1,Zdhhc7,Phip,Gclc,Ctsh,Rxrb,Abhd2,Irs2,Pck2,Hnrnpk,Atp1a1,Pdk2,Trib3,Inhbb,Ptges3,Ar,Zfp106,Prokr2,Pik3r1,Olf…	1.17e-05	0.00047	Cellular response to hormone stimulus	24.4939
Function	GO:0046873	99	383	10090	10090.ENSMUSP00000000199,10090.ENSMUSP00000000201,10090.ENSMUSP00000002848,10090.ENSMUSP00000003442,10090.ENSMUSP00000005952,10090.ENSMUSP00000009875,10090.ENSMUSP00000017900,10090.ENSMUSP00000018614,10090.ENSMUSP00000018651,10090.ENSMUSP00000019290,10090.ENSMUSP00000020107,10090.ENSMUSP00000020312,10090.ENSMUSP00000021195,10090.ENSMUSP00000021750,10090.ENSMUSP00000022567,10090.ENSMUSP00000023486…	Ncs1,Nalcn,Grin2d,Cacnb3,Slc30a4,Kcnd1,Slc12a7,Kcnab3,Trpv2,Cacng2,Atp2b1,Mcu,Slc6a4,Ryr2,Cacna2d3,Tfrc,Asic1,Slc4a8,Slc1a1,Kcnk4,Snap25,Slc23a2,Anxa5,Slc9a1,Grik3,Cdk5,Sec61a1,Slc6a6,Slc5a11,Slc9a9,Slc6a8,Gpm6a,Tmem38a,Anxa2,Atp1b3,Kcnj2,Kcnk9,Nipal2,Kcnt1,Atp1a1,Kcna2,Zdhhc17,Slc9a8,Kcnk1,Kcnh5,Kcnh2,Bzrap1,Trpc5,Mmgt1,Nipa1,Kcna1,Kcng4,Kcnb1,Kcnj9,Kcns3,Grin2b,Scn4b,Kcnj3,Kcnq3,Slc39a6,Kcnmb4,…	1.18e-05	0.00079	Metal ion transmembrane transporter activity	25.8486
Process	GO:0043087	106	418	10090	10090.ENSMUSP00000000058,10090.ENSMUSP00000000193,10090.ENSMUSP00000000590,10090.ENSMUSP00000004326,10090.ENSMUSP00000004646,10090.ENSMUSP00000005066,10090.ENSMUSP00000006618,10090.ENSMUSP00000017799,10090.ENSMUSP00000018880,10090.ENSMUSP00000019577,10090.ENSMUSP00000020339,10090.ENSMUSP00000020640,10090.ENSMUSP00000021011,10090.ENSMUSP00000021050,10090.ENSMUSP00000021380,10090.ENSMUSP00000022185…	Cav2,Ccl2,Rdx,Plxna3,Coro1c,Map2k1,Arhgef19,Cd40,Ndel1,Gipc1,Tbc1d15,Gnb2l1,Ccl7,Adap2,Trappc6b,F2rl1,Spry2,Bcl6,Sod1,Arhgap28,Arhgdig,Arhgap19,Ric8,Chm,Smap1,Rsu1,Itga6,Dock11,Cx3cl1,Pin1,Rasgrf1,Smap2,Vav3,S100a10,Foxj1,Arhgap27,Asap3,Rundc1,Syde1,Usp6nl,Sgsm3,Elmod1,Tax1bp3,Dock9,Tbc1d8,Mtss1l,Plxnb2,Sh3bp1,Erbb2,Arhgap15,Depdc1b,Cdc42ep2,Sipa1l1,F2r,Vav2,Arhgdia,Ptprn2,Arhgap20,Epha3,Adcyap1,…	1.18e-05	0.00047	Regulation of gtpase activity	25.3589
Process	GO:0006898	48	143	10090	10090.ENSMUSP00000000058,10090.ENSMUSP00000000299,10090.ENSMUSP00000000939,10090.ENSMUSP00000002063,10090.ENSMUSP00000003038,10090.ENSMUSP00000019290,10090.ENSMUSP00000021090,10090.ENSMUSP00000023486,10090.ENSMUSP00000024099,10090.ENSMUSP00000026565,10090.ENSMUSP00000028727,10090.ENSMUSP00000030412,10090.ENSMUSP00000031377,10090.ENSMUSP00000032322,10090.ENSMUSP00000032492,10090.ENSMUSP00000032931…	Cav2,Itgb2,Hip1r,Ap4e1,Ap2a2,Cacng2,Grb2,Tfrc,Ache,Ifitm3,Snap25,Ppt1,Scarb2,Lrp6,Cd9,Fchsd2,Ldlr,Snx1,Gak,Arhgap27,Micall1,Cd81,Lrp1,Inpp5f,Ldlrad3,Cd14,Gpr107,Sorl1,Ezr,Dnm3,Nlgn3,Rab31,Ackr3,Drd2,Dab2,Cacng3,Cntn2,Itgb1,Insr,Cltb,Ramp1,Snap91,Cttn,Itga4,Eps15,Cacng8,Htr1b,Lmbrd1	1.22e-05	0.00048	Receptor-mediated endocytosis	33.5664
Process	GO:0051493	130	541	10090	10090.ENSMUSP00000000590,10090.ENSMUSP00000000939,10090.ENSMUSP00000001825,10090.ENSMUSP00000002303,10090.ENSMUSP00000002487,10090.ENSMUSP00000004326,10090.ENSMUSP00000005234,10090.ENSMUSP00000006467,10090.ENSMUSP00000006618,10090.ENSMUSP00000007130,10090.ENSMUSP00000007757,10090.ENSMUSP00000007959,10090.ENSMUSP00000008893,10090.ENSMUSP00000010298,10090.ENSMUSP00000011733,10090.ENSMUSP00000015137…	Rdx,Hip1r,Chordc1,Rhoc,Braf,Plxna3,Wdr1,Arpc2,Arhgef19,Ctnnb1,Tgfbr1,Rhoa,Coro1b,Spire2,Fsd1,Limk1,Fbxw5,Wasf3,Pfn1,Hdac2,Ctgf,Drg1,Pfn4,Grb2,F2rl1,Plk2,Rgcc,Twf1,Pak2,Arhgap28,Rhoq,Smad4,Ppm1f,Gsn,Mapre1,Stmn2,Ubxn2b,Gba2,Prkaa2,Stmn1,Fscn1,Wasl,Mtpn,Add2,Fkbp4,Fchsd2,Rps3,Pak1,Ilk,Fgf13,Cx3cl1,Cdh5,S100a10,Trim36,Bicd2,Plekhh2,Fhod3,Rhov,Asap3,Syde1,Lrp1,Sh3pxd2b,Inpp5j,Wipf2,Trim37,Mapk3,Sh3bp…	1.23e-05	0.00048	Regulation of cytoskeleton organization	24.0296
Process	GO:0043436	179	800	10090	10090.ENSMUSP00000000287,10090.ENSMUSP00000000642,10090.ENSMUSP00000001416,10090.ENSMUSP00000001780,10090.ENSMUSP00000001824,10090.ENSMUSP00000002320,10090.ENSMUSP00000003572,10090.ENSMUSP00000003655,10090.ENSMUSP00000003720,10090.ENSMUSP00000003906,10090.ENSMUSP00000004137,10090.ENSMUSP00000004968,10090.ENSMUSP00000004990,10090.ENSMUSP00000005218,10090.ENSMUSP00000005651,10090.ENSMUSP00000005826…	Scpep1,Hk2,Hars,Akt1,Folh1,Ppard,Gars,As3mt,Crot,Farsa,Gstm7,Plod3,Mapk14,Cd44,Por,Cs,Elovl1,Itih3,Tph2,Acat2,Ddah2,Fads1,Pgam1,Qdpr,Echdc1,Pex7,Pah,Pfkl,Gfpt2,Blmh,Aloxe3,Hif1a,Arg2,Habp4,Sdha,Mccc2,Dhfr,Pdhb,Glud1,Angpt1,Slc25a17,Aco2,Pim1,Glo1,Cyp1b1,Eci1,Me2,Fads2,Cpt1a,Cyp26a1,Scd3,Scd2,Rdh10,Acadl,Cyp27a1,Fh1,Mgst3,Fpgs,Crat,Hsd17b12,Ext2,Hao1,Ivd,Slc23a2,Acss2,Gclm,Ddah1,Decr1,Nr4a3,Prkaa2…	1.25e-05	0.00049	Oxoacid metabolic process	22.375
Component	GO:0001726	57	183	10090	10090.ENSMUSP00000000590,10090.ENSMUSP00000000939,10090.ENSMUSP00000004646,10090.ENSMUSP00000006467,10090.ENSMUSP00000007959,10090.ENSMUSP00000016771,10090.ENSMUSP00000018993,10090.ENSMUSP00000020997,10090.ENSMUSP00000021077,10090.ENSMUSP00000021217,10090.ENSMUSP00000022709,10090.ENSMUSP00000026698,10090.ENSMUSP00000026699,10090.ENSMUSP00000028239,10090.ENSMUSP00000029515,10090.ENSMUSP00000030187…	Rdx,Hip1r,Coro1c,Arpc2,Rhoa,Myh9,Wwc1,Sh3yl1,Slc9a3r1,Nme2,Spry2,Podxl,Mkln1,Gsn,S100a11,Tln1,Pdpn,Tesc,Fscn1,Rps3,Pak1,Klhl2,Anxa2,Jcad,Asap3,Eef1a1,Pacsin1,Inpp5j,Mtss1l,Sh3bp1,Eps8,Arf6,Mtmr9,Them4,Ezr,Tmod3,Map2,Rac1,Wasf2,Cdkl5,Itgb1,Psd3,Cttn,Plcg1,Nf2,Myo10,Arhgef7,Mtmr14,Cyth3,Cfl1,Palld,Nme1,Macf1,Cdk6,Bcar1,Myadm,Actr3	1.25e-05	0.0002	Ruffle	31.1475
Process	GO:0007267	184	827	10090	10090.ENSMUSP00000000058,10090.ENSMUSP00000000127,10090.ENSMUSP00000000572,10090.ENSMUSP00000001115,10090.ENSMUSP00000002708,10090.ENSMUSP00000002848,10090.ENSMUSP00000003313,10090.ENSMUSP00000003442,10090.ENSMUSP00000003971,10090.ENSMUSP00000004673,10090.ENSMUSP00000005218,10090.ENSMUSP00000005255,10090.ENSMUSP00000005279,10090.ENSMUSP00000005509,10090.ENSMUSP00000005532,10090.ENSMUSP00000006181…	Cav2,Wnt3,Gabra2,Grk6,Shh,Grin2d,Grk5,Cacnb3,Lin7b,Ndrg2,Cd44,Wisp1,Klf5,Stx1a,Nid1,Napa,Ctnnb1,Syn2,Slc12a7,Sfrp5,Gipc1,Vip,Kremen1,Sdc1,Slc9a3r1,Nxn,Ryr2,Shc3,Fgf9,Amer2,Ywhaz,Lynx1,P2rx6,Dhh,Calcoco1,Syt4,Gabbr1,Cnih2,Apba1,Rela,Farp1,Gria4,Ecrg4,Fam129b,Frzb,Snap25,Napb,Wnt2b,Lef1,Gucy1b3,Glrb,Sdcbp,Abca1,Prkaa2,Ppt1,Grik3,Rspo1,Cdk5,Draxin,Gabrd,Nsg1,Gabrg1,Bcl7b,Lrp6,Slc17a6,Fchsd2,Dkk3,Pak…	1.26e-05	0.00049	Cell-cell signaling	22.2491
Process	GO:0010771	37	97	10090	10090.ENSMUSP00000000127,10090.ENSMUSP00000000641,10090.ENSMUSP00000004326,10090.ENSMUSP00000004646,10090.ENSMUSP00000004920,10090.ENSMUSP00000025993,10090.ENSMUSP00000030568,10090.ENSMUSP00000030714,10090.ENSMUSP00000030814,10090.ENSMUSP00000030862,10090.ENSMUSP00000030868,10090.ENSMUSP00000031229,10090.ENSMUSP00000033473,10090.ENSMUSP00000042211,10090.ENSMUSP00000049063,10090.ENSMUSP00000053101…	Wnt3,Sema4f,Plxna3,Coro1c,Ulk2,Slit1,Sema3c,Sema3a,Cdk5,Draxin,Sema3d,Rufy3,Fgf13,Sema7a,Trpc5,Ppp3ca,Ptprs,Dnm3,Nlgn3,Sema5a,Sema3e,Efna5,Map2,Syngap1,Rgma,Rtn4,Ephb2,Dab1,Ube3a,Tnr,Thy1,Rapgef2,Rnf6,Slit2,Bcar1,Sema6b,Actr3	1.27e-05	0.0005	Negative regulation of cell morphogenesis involved in differentiation	38.1443
Process	GO:0008610	108	429	10090	10090.ENSMUSP00000001507,10090.ENSMUSP00000002320,10090.ENSMUSP00000004327,10090.ENSMUSP00000004381,10090.ENSMUSP00000005003,10090.ENSMUSP00000006557,10090.ENSMUSP00000006692,10090.ENSMUSP00000010807,10090.ENSMUSP00000015858,10090.ENSMUSP00000020182,10090.ENSMUSP00000020846,10090.ENSMUSP00000020997,10090.ENSMUSP00000021268,10090.ENSMUSP00000021424,10090.ENSMUSP00000021990,10090.ENSMUSP00000022169…	Cyp51,Ppard,G6pdx,Lpcat3,Lbr,Elovl1,Mvd,Fads1,Cers2,Pex7,Srebf1,Sh3yl1,Aloxe3,Sptlc2,Ptdss1,Hexb,Hmgcr,Sqle,Cers5,Nus1,Agpat4,Pigf,Fads2,Tm7sf2,Cyp26a1,Pcyt2,Scd3,Scd2,St8sia2,Rdh10,Cyp27a1,Agpat2,Lpcat4,Hsd17b12,Crls1,Fabp5,Acss2,Ugcg,Prkaa2,Prkag2,Coq2,Cds1,Dgat2,Ebp,Acsl4,Nsdhl,Star,Msmo1,Acsl1,St3gal2,Pla2g15,St3gal4,St6galnac5,Hsd3b7,Prkab2,Scd1,Tspo,Dhcr24,Pck2,Acer2,Sccpdh,Agps,Smpd1,Pcyt1…	1.27e-05	0.0005	Lipid biosynthetic process	25.1748
Component	GO:0030659	119	485	10090	10090.ENSMUSP00000000058,10090.ENSMUSP00000000572,10090.ENSMUSP00000000939,10090.ENSMUSP00000001347,10090.ENSMUSP00000003038,10090.ENSMUSP00000003117,10090.ENSMUSP00000003550,10090.ENSMUSP00000004920,10090.ENSMUSP00000005509,10090.ENSMUSP00000007236,10090.ENSMUSP00000009003,10090.ENSMUSP00000009234,10090.ENSMUSP00000009538,10090.ENSMUSP00000009727,10090.ENSMUSP00000010298,10090.ENSMUSP00000019734…	Cav2,Gabra2,Hip1r,Rnd2,Ap2a2,Ap1m1,Ncstn,Ulk2,Stx1a,Syngr3,Rala,Ap1b1,Syn2,Syngr1,Spire2,Cyb561,Nsg2,Srebf1,Rab10,Gosr2,Ryr2,Scamp1,Adcy8,Syt4,Pnliprp2,Stx6,Sec22b,Snx7,Stx12,Cd38,Nsg1,Scarb2,Rab35,Sec61a1,Gabarapl1,Slc2a3,Necap1,Slc17a6,Tmem30a,Bsn,Scamp5,BC022687,Abhd2,Copg2,Ptchd2,Exoc3,Camkv,Nmnat2,Clic4,Zdhhc17,Pacsin1,Myof,Abca3,Gde1,Myrip,Cpe,Oprd1,Svop,Lamp2,Syt12,Pam,Vti1b,Rab11fip1,Rab1…	1.29e-05	0.0002	Cytoplasmic vesicle membrane	24.5361
Process	GO:0030308	60	197	10090	10090.ENSMUSP00000000127,10090.ENSMUSP00000000542,10090.ENSMUSP00000000641,10090.ENSMUSP00000002320,10090.ENSMUSP00000004326,10090.ENSMUSP00000004327,10090.ENSMUSP00000004920,10090.ENSMUSP00000005647,10090.ENSMUSP00000008528,10090.ENSMUSP00000020640,10090.ENSMUSP00000022701,10090.ENSMUSP00000023151,10090.ENSMUSP00000025393,10090.ENSMUSP00000025862,10090.ENSMUSP00000025993,10090.ENSMUSP00000028389…	Wnt3,Acvrl1,Sema4f,Ppard,Plxna3,G6pdx,Ulk2,Ndufs3,Sertad1,Gnb2l1,Rb1,Bcl6,Smad4,Smarca2,Slit1,Frzb,Ppt1,Cda,Sema3c,Sema3a,Cdk5,Draxin,Sema3d,Cgref1,Pak1,Fgf13,Sfrp1,Dcbld2,Sema7a,AF529169,Nov,Ptprs,Slit3,Sh3bp4,Sema5a,Cgrrf1,Foxk1,Sema3e,Map2,Dab2,Cdkn2d,Rgma,Rtn4,Dact3,Ppara,Nf2,Prdm11,Caprin2,Tnr,Adipor1,Bcl2,Cfl1,Rerg,Cth,Rnf6,Slit2,Tomm70a,Sema6b,Actr3,Dnajb2	1.31e-05	0.00051	Negative regulation of cell growth	30.4569
COMPARTMENTS	GOCC:0005769	65	220	10090	10090.ENSMUSP00000003550,10090.ENSMUSP00000005066,10090.ENSMUSP00000005798,10090.ENSMUSP00000019939,10090.ENSMUSP00000020329,10090.ENSMUSP00000020643,10090.ENSMUSP00000021285,10090.ENSMUSP00000022185,10090.ENSMUSP00000023486,10090.ENSMUSP00000025684,10090.ENSMUSP00000025875,10090.ENSMUSP00000026565,10090.ENSMUSP00000026896,10090.ENSMUSP00000027396,10090.ENSMUSP00000027693,10090.ENSMUSP00000027743…	Ncstn,Map2k1,Snx6,Snx3,Egfr,Rufy1,Stx8,F2rl1,Tfrc,Ehd1,Slc1a1,Ifitm3,St8sia2,Abcb6,Rab29,Stx6,Snx16,Ptpn1,Cd1d1,Nsg1,Vps33a,Snx8,Ret,Lrp6,Vps26b,Ldlr,Anxa2,Snx1,Cmtm6,Lrp1,Neu3,Uvrag,Inpp5f,Dagla,Mapk3,Mmgt1,Nipa1,Arf6,Gpr107,Vti1b,Olfr78,Rab11fip5,Slc35d3,Epha3,Pld4,Rab31,Pi4k2a,Vps41,Mon2,Osbpl6,Htt,Rac1,Wasf2,Hmgb1,Rubcn,Pla2g4e,Ankrd13b,Mib2,Eps15,Atp9a,Nf2,Rab4a,Derl2,Mmgt2,Sh3glb1	1.31e-05	0.00037	Early endosome	29.5455
Process	GO:0007167	133	558	10090	10090.ENSMUSP00000000058,10090.ENSMUSP00000000186,10090.ENSMUSP00000000193,10090.ENSMUSP00000000542,10090.ENSMUSP00000000579,10090.ENSMUSP00000001319,10090.ENSMUSP00000001780,10090.ENSMUSP00000002487,10090.ENSMUSP00000004990,10090.ENSMUSP00000005077,10090.ENSMUSP00000007757,10090.ENSMUSP00000009143,10090.ENSMUSP00000014743,10090.ENSMUSP00000016672,10090.ENSMUSP00000018880,10090.ENSMUSP00000020171…	Cav2,Fgf23,Ccl2,Acvrl1,Sox9,Efnb2,Akt1,Braf,Mapk14,Hspb1,Tgfbr1,Bmp7,Csf1,Mapkapk2,Ndel1,Ctgf,Eif4ebp2,Egfr,Srebf1,Ddx5,Grb2,Fos,Shc3,Caml,Fst,Fgf9,Gfra2,Angpt1,Nus1,Rhoq,Bambi,Smad4,Zfand5,Gfra1,Hexa,Smad7,Parp1,Vim,Acvr1c,Grb14,Ptpn1,Dok5,Smad9,Lef1,Efna3,Cpne3,Nr4a3,Npr2,Stmn1,Tgfa,Ret,Pak1,Col4a1,Plat,Hpgd,Cdh5,Phip,Stoml1,Myd88,Irs2,Socs5,Flt3,Pdk2,Scx,Inhbb,Ndn,Fgf1,Nceh1,Nrtn,Tiparp,Garem,…	1.37e-05	0.00053	Enzyme linked receptor protein signaling pathway	23.8351
Process	GO:0006066	80	292	10090	10090.ENSMUSP00000001507,10090.ENSMUSP00000003850,10090.ENSMUSP00000004327,10090.ENSMUSP00000005003,10090.ENSMUSP00000006692,10090.ENSMUSP00000008579,10090.ENSMUSP00000015950,10090.ENSMUSP00000020217,10090.ENSMUSP00000020241,10090.ENSMUSP00000020846,10090.ENSMUSP00000020864,10090.ENSMUSP00000021424,10090.ENSMUSP00000021450,10090.ENSMUSP00000021668,10090.ENSMUSP00000021684,10090.ENSMUSP00000022176…	Cyp51,Itpkc,G6pdx,Lbr,Mvd,Rdh13,Qdpr,Nudt4,Pah,Srebf1,Pctp,Sptlc2,Sgpp1,Npc2,Cyp46a1,Hmgcr,Dhfr,Sqle,Aco2,Nus1,Abcg1,Cyp1b1,Nudt3,Aldh1a7,Tm7sf2,Cyp26a1,Rdh5,Rdh10,Cyp27a1,Cln8,Bpnt1,Cat,Hao1,Lrat,Abca1,Gba2,Prkaa2,Akr1a1,Coq2,Aldh2,Dgat2,Ebp,Nsdhl,Star,Msmo1,Ldlr,Hsd3b7,Sgpp2,Dhcr24,Ptchd2,Pck2,Acer2,Akr1b8,Smpd1,Mtmr7,Lrp1,Myof,Itpk1,Gde1,Plcl2,Inpp5j,Lss,Aldh3b1,Sc5d,Mbtps2,Insig1,Impa1,Cyp26b…	1.45e-05	0.00056	Alcohol metabolic process	27.3973
COMPARTMENTS	GOCC:0000323	88	331	10090	10090.ENSMUSP00000001963,10090.ENSMUSP00000002007,10090.ENSMUSP00000002100,10090.ENSMUSP00000002885,10090.ENSMUSP00000003550,10090.ENSMUSP00000004173,10090.ENSMUSP00000006235,10090.ENSMUSP00000006912,10090.ENSMUSP00000016400,10090.ENSMUSP00000018711,10090.ENSMUSP00000019962,10090.ENSMUSP00000020537,10090.ENSMUSP00000020909,10090.ENSMUSP00000021285,10090.ENSMUSP00000021668,10090.ENSMUSP00000022169…	Ace,Siae,Tmem25,Epdr1,Ncstn,Cdip1,Ctsb,Pip4k2a,Ctsz,Gabarap,Cd164,Nsg2,Laptm4a,Stx8,Npc2,Hexb,Anxa11,Cln5,Naga,Sod1,Seh1l,Slc15a3,Hexa,Ifitm3,Tmem192,Abcb6,Itm2c,Dpp7,Sppl2a,Cst3,Lamtor2,Cd1d1,Bcl10,Ppt1,Fuca1,Man2b2,Nsg1,Scarb2,Vps33a,Atp6ap2,Man2b1,Ifi30,Pla2g15,Ldlr,Anxa2,Ctsh,Snx1,Rragb,Snx2,Atp13a2,Smpd1,Gns,Neu3,Uvrag,Plekhm1,Slc2a6,Rnf152,Slc38a9,Lamp2,Lipa,Vti1b,Slc35f6,Grin2b,Gfap,Rab7b,…	1.46e-05	0.00041	Lytic vacuole	26.5861
Process	GO:0048167	65	221	10090	10090.ENSMUSP00000002487,10090.ENSMUSP00000002848,10090.ENSMUSP00000003550,10090.ENSMUSP00000003754,10090.ENSMUSP00000009727,10090.ENSMUSP00000017881,10090.ENSMUSP00000019577,10090.ENSMUSP00000020288,10090.ENSMUSP00000020706,10090.ENSMUSP00000021684,10090.ENSMUSP00000022212,10090.ENSMUSP00000022819,10090.ENSMUSP00000023007,10090.ENSMUSP00000025110,10090.ENSMUSP00000026357,10090.ENSMUSP00000028727…	Braf,Grin2d,Ncstn,Calb2,Syngr1,Mmp9,Gipc1,Eif4ebp2,Adcy1,Cyp46a1,Plk2,Jph4,Adcy8,Syt4,Jph3,Snap25,Calb1,Ncdn,Cdk5,Cd38,Nsg1,Pak1,Stx4a,Star,Cbln1,Rasgrf1,Hnrnpk,Brsk1,Egr2,Zdhhc2,Rims4,Syt12,Kcnb1,Sipa1l1,Crh,Grin2b,Gfap,Nlgn3,Shisa6,Nf1,Drd2,Crtc1,Htt,Rac1,Syngap1,Cntn2,Stxbp1,Fgf14,Rasgrf2,Ptn,Sqstm1,Ephb2,Shank1,Atf4,Camk2b,Tnr,Grin2a,Cfl1,Rapgef2,Ssh1,Prrt2,Lrrtm1,Abhd6,Lzts1,Vgf	1.47e-05	0.00056	Regulation of synaptic plasticity	29.4118
TISSUES	BTO:0000439	127	528	10090	10090.ENSMUSP00000000642,10090.ENSMUSP00000001544,10090.ENSMUSP00000003754,10090.ENSMUSP00000004508,10090.ENSMUSP00000006721,10090.ENSMUSP00000006828,10090.ENSMUSP00000007130,10090.ENSMUSP00000007236,10090.ENSMUSP00000009003,10090.ENSMUSP00000014022,10090.ENSMUSP00000016143,10090.ENSMUSP00000017576,10090.ENSMUSP00000018966,10090.ENSMUSP00000019231,10090.ENSMUSP00000020537,10090.ENSMUSP00000020986…	Hk2,Vwa5a,Calb2,Tmed4,Cryba2,Aplp1,Ctnnb1,Syngr3,Rala,Rnf170,Wasf3,Rbfox3,Sfrp5,Atp6ap1,Nsg2,Dnajc27,Ube2g1,Adcy2,Opn4,Cdhr1,Tkt,Clu,Nefl,Angpt1,Samm50,Faim2,Ache,Rfk,Chm,Mrpl44,Lhx4,Strbp,Fbxo3,Chgb,Napb,Glrb,Rit1,Calb1,Anapc4,Uchl1,Cds1,Pde6b,Slc6a6,St8sia1,Slc2a3,Rtn2,Slc17a6,Nr2f2,Fgf13,Morf4l2,Ist1,Tmem38a,Acat1,Fem1b,Scamp5,Tspyl4,Fam115a,Atcay,Car14,Kcnj2,Scai,Cplx1,Lum,Irf2bpl,Ina,Ddx21,S…	1.48e-05	0.00097	Eye	24.053
COMPARTMENTS	GOCC:0015629	92	351	10090	10090.ENSMUSP00000000590,10090.ENSMUSP00000003451,10090.ENSMUSP00000003575,10090.ENSMUSP00000003754,10090.ENSMUSP00000004646,10090.ENSMUSP00000005234,10090.ENSMUSP00000005509,10090.ENSMUSP00000006467,10090.ENSMUSP00000008893,10090.ENSMUSP00000016771,10090.ENSMUSP00000018711,10090.ENSMUSP00000019577,10090.ENSMUSP00000020775,10090.ENSMUSP00000021207,10090.ENSMUSP00000022369,10090.ENSMUSP00000022709…	Rdx,Rnd1,Tpm4,Calb2,Coro1c,Wdr1,Stx1a,Arpc2,Coro1b,Myh9,Gabarap,Gipc1,Dynll2,Fam101b,Vcl,Spry2,Twf1,Rhoq,Dpysl3,Myl6b,Dctn2,Gsn,Snap25,Cnn3,Calb1,Slc2a1,Lurap1,Fscn1,Wasl,Mtpn,Add2,Pak1,Klhl2,Cib2,Plekhh2,Micall2,Fhod3,Eef1a1,Cdc42bpb,Sh3pxd2b,Myrip,Acta2,Mtss1l,Ptges3,Ezr,Pdlim1,Epha3,Nav1,Afap1,Ppp1r12a,Prkcb,Actg1,Tmod3,Myo5b,Dgkh,Arhgap35,Map2,Arpc5,Mtss1,Dab2,Sh3pxd2a,Arpc1b,Notch3,Myl9,Marc…	1.51e-05	0.00042	Actin cytoskeleton	26.2108
Process	GO:0030258	63	212	10090	10090.ENSMUSP00000002320,10090.ENSMUSP00000003720,10090.ENSMUSP00000004381,10090.ENSMUSP00000004990,10090.ENSMUSP00000005651,10090.ENSMUSP00000006912,10090.ENSMUSP00000007005,10090.ENSMUSP00000013970,10090.ENSMUSP00000018691,10090.ENSMUSP00000020034,10090.ENSMUSP00000020182,10090.ENSMUSP00000021450,10090.ENSMUSP00000023040,10090.ENSMUSP00000024706,10090.ENSMUSP00000024946,10090.ENSMUSP00000025236…	Ppard,Crot,Lpcat3,Mapk14,Por,Pip4k2a,Acat2,Pip4k2c,Pip4k2b,Echdc1,Pex7,Sgpp1,Slc25a17,Pla2g7,Eci1,Stard4,Cpt1a,Acadl,Bpnt1,Crat,Hao1,Ivd,Decr1,Gba2,Cpt2,Fam126a,Acads,St3gal2,St3gal4,Acat1,Etfa,Sgpp2,Scd1,Acaa2,Socs5,Mtmr7,Inpp5f,Inpp5j,Ppapdc2,Pip5kl1,D3Bwg0562e,Pik3r1,Socs3,Mtmr9,Pik3cg,Acox1,Slc35c1,Impa1,Abcd2,Pi4k2a,Dgkh,Porcn,Impad1,Cish,BC005764,Ppapdc1a,Mboat4,Mtmr4,Adipor1,Ppargc1a,Gbgt1…	1.52e-05	0.00058	Lipid modification	29.717
COMPARTMENTS	GOCC:0098791	66	226	10090	10090.ENSMUSP00000000895,10090.ENSMUSP00000002063,10090.ENSMUSP00000003117,10090.ENSMUSP00000004968,10090.ENSMUSP00000009219,10090.ENSMUSP00000009234,10090.ENSMUSP00000020350,10090.ENSMUSP00000020420,10090.ENSMUSP00000020537,10090.ENSMUSP00000021001,10090.ENSMUSP00000021201,10090.ENSMUSP00000021285,10090.ENSMUSP00000023064,10090.ENSMUSP00000025590,10090.ENSMUSP00000027693,10090.ENSMUSP00000027743…	Necab3,Ap4e1,Ap1m1,Plod3,Cabp7,Ap1b1,Lgr5,Ap3d1,Nsg2,Rab10,Cpd,Stx8,Cby1,Osbp,Rab29,Stx6,Snap25,B4galt1,Adc,Nsg1,Ccdc91,Rab30,Xylt1,Rab6a,Stx4a,Nucb1,Galnt2,Bsn,Scamp5,Fam91a1,Nmnat2,March9,Bet1,Akap9,Cnst,Coro7,Lamp2,Gcc2,Pam,Golph3,Pigz,Vps53,Adam10,Rab7b,Pld4,Hook2,Rab31,Slc9a7,Ap3s2,Rac1,Impad1,Caln1,Man2a1,Stx16,Cltb,St3gal1,Arfgef2,Car4,Lrba,Atp9a,Klhl20,Plekha8,Golga7,Ift88,Rab27b,Golph3l	1.53e-05	0.00042	Golgi apparatus subcompartment	29.2035
Process	GO:0034220	197	901	10090	10090.ENSMUSP00000000090,10090.ENSMUSP00000000199,10090.ENSMUSP00000000201,10090.ENSMUSP00000000572,10090.ENSMUSP00000000984,10090.ENSMUSP00000001126,10090.ENSMUSP00000002848,10090.ENSMUSP00000003442,10090.ENSMUSP00000003622,10090.ENSMUSP00000004396,10090.ENSMUSP00000005952,10090.ENSMUSP00000007207,10090.ENSMUSP00000007257,10090.ENSMUSP00000009522,10090.ENSMUSP00000009875,10090.ENSMUSP00000014750…	Cox5a,Ncs1,Nalcn,Gabra2,Slc7a7,Slc46a1,Grin2d,Cacnb3,Slc25a1,Atp6v1f,Slc30a4,Clcn2,Clic1,Slc16a12,Kcnd1,Slc25a11,Nol3,Slc12a7,Kcnab3,Trpv2,Slc22a5,Slc35b4,Atp6ap1,Cacng2,Atp6v1e1,Atp2b1,Mcu,Slc22a4,Slc9a3r1,Slc6a4,Atp6v1d,Slc25a29,Ryr2,Sfxn1,Vdac2,Ero1l,Micu2,Cacna2d3,Slc25a30,Ank,Slc25a17,P2rx6,Tfrc,Atp5o,Asic1,Slc4a8,Slc15a3,Slc1a1,Kcnk4,Gria4,Abcb6,Slc16a14,Cln8,Tmem206,Snap25,Slc23a2,Anxa5,Sl…	1.56e-05	0.00059	Ion transmembrane transport	21.8646
Process	GO:0032388	59	194	10090	10090.ENSMUSP00000000193,10090.ENSMUSP00000000590,10090.ENSMUSP00000001592,10090.ENSMUSP00000002029,10090.ENSMUSP00000002708,10090.ENSMUSP00000003442,10090.ENSMUSP00000004990,10090.ENSMUSP00000006467,10090.ENSMUSP00000021514,10090.ENSMUSP00000023048,10090.ENSMUSP00000025399,10090.ENSMUSP00000025684,10090.ENSMUSP00000027693,10090.ENSMUSP00000028241,10090.ENSMUSP00000030814,10090.ENSMUSP00000030851…	Ccl2,Rdx,Jup,Emd,Shh,Cacnb3,Mapk14,Arpc2,Ppm1a,Mief1,Pmaip1,Ehd1,Rab29,Stom,Cdk5,Tomm7,Rufy3,Camk1,Tnfrsf1a,Ipo5,Pak1,Anxa2,Tmem30a,Fam115a,BC018507,Ptpn23,Zdhhc2,Cd81,Camk4,Mlc1,Erbb2,Cdc42,Pik3r1,Kcnb1,Sorl1,Slc35d3,Cemip,Ezr,Khdrbs1,Ep300,Ywhae,Map2,Mff,Dab2,Numa1,Edem1,Pla2g4e,Ank3,Ehd2,Tek,Ubr5,Dctn1,Msn,Pdcd10,Sh3glb1,Cep290,Xpo4,Oaz1,Actr3	1.59e-05	0.0006	Positive regulation of intracellular transport	30.4124
Component	GO:0031012	115	468	10090	10090.ENSMUSP00000000127,10090.ENSMUSP00000001544,10090.ENSMUSP00000002412,10090.ENSMUSP00000002708,10090.ENSMUSP00000004208,10090.ENSMUSP00000004968,10090.ENSMUSP00000005073,10090.ENSMUSP00000005255,10090.ENSMUSP00000005532,10090.ENSMUSP00000006235,10090.ENSMUSP00000006367,10090.ENSMUSP00000006697,10090.ENSMUSP00000007738,10090.ENSMUSP00000009143,10090.ENSMUSP00000009530,10090.ENSMUSP00000011400…	Wnt3,Vwa5a,Ncan,Shh,Angptl2,Plod3,Zp3,Wisp1,Nid1,Ctsb,Htra1,Itih3,Hapln4,Bmp7,Timp1,Adam19,Gfod2,Lama5,Lamb3,Ctsz,Serpinb6a,Timp2,Mmp9,Ctgf,Ntn4,Timp3,Ogn,Cd180,Anxa11,Fgf9,Loxl2,Bmp1,Angpt1,Adamts1,Ache,Mmp19,Entpd2,Itga6,Hsd17b12,Cst3,Anxa5,Ptx3,S100a11,Thbs3,Cyr61,Mmp16,Sema3c,Megf6,Sparcl1,Mmp17,Hapln3,Acan,Col4a1,Sfrp1,Mmp15,Anxa2,S100a10,Frem3,Lman1,Tecta,Lum,Spon1,Serpina3k,Fras1,Lama1,Lga…	1.69e-05	0.00026	Extracellular matrix	24.5726
RCTM	MMU-373760	29	67	10090	10090.ENSMUSP00000000590,10090.ENSMUSP00000001513,10090.ENSMUSP00000003038,10090.ENSMUSP00000005066,10090.ENSMUSP00000020329,10090.ENSMUSP00000022629,10090.ENSMUSP00000029912,10090.ENSMUSP00000032233,10090.ENSMUSP00000033040,10090.ENSMUSP00000051033,10090.ENSMUSP00000051619,10090.ENSMUSP00000060246,10090.ENSMUSP00000062782,10090.ENSMUSP00000063734,10090.ENSMUSP00000064538,10090.ENSMUSP00000071134…	Rdx,Tubb6,Ap2a2,Map2k1,Egfr,Dpysl2,Sdcbp,Tuba8,Pak1,Tuba1c,Mapk3,Tubb2a,Vav2,Ezr,Dnm3,Tubb3,Actg1,Tubb2b,Tuba1b,Rac1,Itgb1,Tuba1a,Csnk2a1,Actb,Gap43,L1cam,Msn,Ank1,Ncam1	1.7e-05	0.0017	L1CAM interactions	43.2836
Process	GO:0030029	131	551	10090	10090.ENSMUSP00000000939,10090.ENSMUSP00000002889,10090.ENSMUSP00000003451,10090.ENSMUSP00000003575,10090.ENSMUSP00000004646,10090.ENSMUSP00000005234,10090.ENSMUSP00000006467,10090.ENSMUSP00000007959,10090.ENSMUSP00000008893,10090.ENSMUSP00000009003,10090.ENSMUSP00000010298,10090.ENSMUSP00000015137,10090.ENSMUSP00000016143,10090.ENSMUSP00000016771,10090.ENSMUSP00000018437,10090.ENSMUSP00000020312…	Hip1r,Flii,Rnd1,Tpm4,Coro1c,Wdr1,Arpc2,Rhoa,Coro1b,Rala,Spire2,Limk1,Wasf3,Myh9,Pfn1,Mcu,Slc9a3r1,Coro6,Fam101b,Ryr2,Cap2,Twf1,Bcl6,Cxadr,Rhoq,Pfdn1,Epb4.1l4a,Dpysl3,Myl6b,Farp1,Mkln1,Gsn,Ptpn1,Cnn3,Sdcbp,Epb4.1l4b,Tln1,Pdpn,Lurap1,Slc9a1,Cdk5,Rufy3,Sdad1,Fscn1,Wasl,Add2,Pak1,Sfrp1,Six4,Kcnj2,Foxj1,Micall2,Thsd7a,Ina,Fhod3,Rhov,Micall1,Cdc42bpb,Syde1,Pacsin1,Prkcdbp,Fmnl1,Myrip,Wipf2,Kcnh2,Coro7,…	1.75e-05	0.00066	Actin filament-based process	23.775
Function	GO:0015075	175	784	10090	10090.ENSMUSP00000000090,10090.ENSMUSP00000000199,10090.ENSMUSP00000000201,10090.ENSMUSP00000000572,10090.ENSMUSP00000000984,10090.ENSMUSP00000001126,10090.ENSMUSP00000002848,10090.ENSMUSP00000003442,10090.ENSMUSP00000003622,10090.ENSMUSP00000004396,10090.ENSMUSP00000005952,10090.ENSMUSP00000007207,10090.ENSMUSP00000007257,10090.ENSMUSP00000009522,10090.ENSMUSP00000009875,10090.ENSMUSP00000014750…	Cox5a,Ncs1,Nalcn,Gabra2,Slc7a7,Slc46a1,Grin2d,Cacnb3,Slc25a1,Atp6v1f,Slc30a4,Clcn2,Clic1,Slc16a12,Kcnd1,Slc25a11,Slc12a7,Kcnab3,Trpv2,Slc22a5,Slc35b4,Cacng2,Atp6v1e1,Atp2b1,Mcu,Slc22a4,Slc9a3r1,Slc6a4,Atp6v1d,Slc25a29,Ryr2,Sfxn1,Vdac2,Cacna2d3,Slc25a30,Ank,Slc25a17,P2rx6,Tfrc,Atp5o,Asic1,Slc4a8,Slc15a3,Slc1a1,Kcnk4,Gria4,Slc16a14,Tmem206,Snap25,Slc23a2,Anxa5,Slc7a11,Slc25a24,Glrb,Slc35a1,Slc2a1,S…	1.75e-05	0.0012	Ion transmembrane transporter activity	22.3214
Process	GO:0010632	67	232	10090	10090.ENSMUSP00000000542,10090.ENSMUSP00000000579,10090.ENSMUSP00000001548,10090.ENSMUSP00000001592,10090.ENSMUSP00000001780,10090.ENSMUSP00000002708,10090.ENSMUSP00000004646,10090.ENSMUSP00000005077,10090.ENSMUSP00000007959,10090.ENSMUSP00000017799,10090.ENSMUSP00000017881,10090.ENSMUSP00000018437,10090.ENSMUSP00000018644,10090.ENSMUSP00000021530,10090.ENSMUSP00000022212,10090.ENSMUSP00000022595…	Acvrl1,Sox9,Itga3,Jup,Akt1,Shh,Coro1c,Hspb1,Rhoa,Cd40,Mmp9,Pfn1,Adora2b,Hif1a,Plk2,Rgcc,Angpt1,Nus1,Ppm1f,Spred1,Epb4.1l4b,Glipr2,Sema3a,Nr2f2,Gpr124,Ctsh,Jcad,Ptpn23,Rras,Gadd45a,Thbs1,Fgf1,Dusp10,Gpi1,Sh3bp1,Itga2,Arf6,Rhoj,Has2,Ptprr,Sp100,Sema5a,Dnaja4,Nf1,Adam9,Glul,Arsb,Prkce,Ptn,Plcg1,Nfe2l2,Tek,Rtn4,Gata3,Dcn,Jun,Akt3,Adipor1,Srpx2,Met,Macf1,Pdcd10,Map4k4,Slit2,Card10,Bcar1,Iqsec1	1.78e-05	0.00067	Regulation of epithelial cell migration	28.8793
COMPARTMENTS	GOCC:0060076	31	75	10090	10090.ENSMUSP00000001548,10090.ENSMUSP00000003754,10090.ENSMUSP00000018437,10090.ENSMUSP00000023007,10090.ENSMUSP00000023441,10090.ENSMUSP00000032710,10090.ENSMUSP00000034076,10090.ENSMUSP00000035208,10090.ENSMUSP00000039368,10090.ENSMUSP00000060110,10090.ENSMUSP00000062158,10090.ENSMUSP00000062284,10090.ENSMUSP00000063329,10090.ENSMUSP00000066304,10090.ENSMUSP00000071025,10090.ENSMUSP00000074578…	Itga3,Calb2,Pfn1,Adcy8,P2rx6,Slc17a6,Cbln1,Bsn,Ptprf,Kcnj9,Lrrc4,Grin2b,Kcnj3,Nlgn3,Shisa6,Ntm,Gria3,Scn8a,Cacng3,Cntn6,Snap91,Shank1,Cadm3,Srpx2,Cntnap2,Met,Grin2a,Palld,Grm4,Lrrtm1,Actr3	1.82e-05	0.00049	Excitatory synapse	41.3333
WikiPathways	WP6	37	99	10090	10090.ENSMUSP00000000058,10090.ENSMUSP00000000299,10090.ENSMUSP00000001548,10090.ENSMUSP00000001780,10090.ENSMUSP00000002487,10090.ENSMUSP00000005066,10090.ENSMUSP00000020949,10090.ENSMUSP00000021090,10090.ENSMUSP00000021898,10090.ENSMUSP00000022369,10090.ENSMUSP00000023467,10090.ENSMUSP00000026360,10090.ENSMUSP00000028522,10090.ENSMUSP00000030187,10090.ENSMUSP00000033040,10090.ENSMUSP00000033182…	Cav2,Itgb2,Itga3,Akt1,Braf,Map2k1,Map2k6,Grb2,Shc3,Vcl,Pak2,Itgb8,Itga6,Tln1,Pak1,Ilk,Vav3,Mapk6,Capn5,Itga2,Cdc42,Vav2,Rap1b,Sos1,Capn2,Rac1,Itgb1,Mapk4,Shc1,Sorbs1,Pak6,Itga4,Arhgef7,Akt3,Mapk10,Zyx,Bcar1	1.82e-05	0.0006	Integrin-mediated cell adhesion	37.3737
Keyword	KW-0443	115	469	10090	10090.ENSMUSP00000001507,10090.ENSMUSP00000002549,10090.ENSMUSP00000003720,10090.ENSMUSP00000004381,10090.ENSMUSP00000005003,10090.ENSMUSP00000006557,10090.ENSMUSP00000006692,10090.ENSMUSP00000010807,10090.ENSMUSP00000015858,10090.ENSMUSP00000020846,10090.ENSMUSP00000021268,10090.ENSMUSP00000021424,10090.ENSMUSP00000021668,10090.ENSMUSP00000021684,10090.ENSMUSP00000021990,10090.ENSMUSP00000022176…	Cyp51,Abhd3,Crot,Lpcat3,Lbr,Elovl1,Mvd,Fads1,Cers2,Srebf1,Aloxe3,Sptlc2,Npc2,Cyp46a1,Ptdss1,Hmgcr,Cers5,Nus1,Agpat4,Pla2g7,Cyp1b1,Eci1,Fads2,Tm7sf2,Cpt1a,Pnliprp2,Pcyt2,Scd3,Scd2,Rdh5,Acadl,Cyp27a1,Crat,Agpat2,Lpcat4,Hsd17b12,Crls1,Decr1,Ugcg,Gba2,Prkaa2,Cpt2,Prkag2,Cds1,Aacs,Acads,St8sia1,Dgat2,Ebp,Acsl4,Nsdhl,Msmo1,Hpgd,Acsl1,Pla2g15,Acat1,Ldlr,Prkab2,Scd1,Acaa2,Dhcr24,Abhd2,Ptchd2,Acer2,Faah,A…	1.83e-05	0.00033	Lipid metabolism	24.5203
COMPARTMENTS	GOCC:0098589	82	304	10090	10090.ENSMUSP00000000001,10090.ENSMUSP00000000058,10090.ENSMUSP00000000109,10090.ENSMUSP00000000122,10090.ENSMUSP00000000299,10090.ENSMUSP00000002708,10090.ENSMUSP00000004646,10090.ENSMUSP00000007130,10090.ENSMUSP00000007757,10090.ENSMUSP00000008878,10090.ENSMUSP00000020329,10090.ENSMUSP00000021077,10090.ENSMUSP00000021195,10090.ENSMUSP00000022369,10090.ENSMUSP00000022921,10090.ENSMUSP00000023007…	Gnai3,Cav2,Cntn1,Ngfr,Itgb2,Shh,Coro1c,Ctnnb1,Tgfbr1,Gprc5b,Egfr,Slc9a3r1,Slc6a4,Vcl,Angpt1,Adcy8,Cxadr,Faim2,Rhoq,Fas,Slc1a1,Cd55,Stom,Snap25,Lamtor2,Bcl10,Sdcbp,Abca1,Stoml2,Pdpn,Tnfrsf1b,Slc2a1,Ppt1,Slc9a1,Abcg2,Ret,Slc2a3,Tnfrsf1a,Ldlr,Anxa2,Atp1b3,Rragb,Bicd2,Atp1a1,Cbl,Prkcdbp,Myof,Gpc1,Mlc1,Cpe,Trpc5,Mapk3,Slc38a9,Erbb2,Sdpr,Cd14,Gnai2,F2r,Has2,Ezr,Capn2,Flot2,Eno1,Kcnd2,Itgb1,Rraga,Insr,C…	1.83e-05	0.00049	Membrane region	26.9737
Process	GO:0071363	113	459	10090	10090.ENSMUSP00000000186,10090.ENSMUSP00000000193,10090.ENSMUSP00000000542,10090.ENSMUSP00000000579,10090.ENSMUSP00000000590,10090.ENSMUSP00000001780,10090.ENSMUSP00000002029,10090.ENSMUSP00000002487,10090.ENSMUSP00000004202,10090.ENSMUSP00000004990,10090.ENSMUSP00000005077,10090.ENSMUSP00000005218,10090.ENSMUSP00000005798,10090.ENSMUSP00000006467,10090.ENSMUSP00000007130,10090.ENSMUSP00000007757…	Fgf23,Ccl2,Acvrl1,Sox9,Rdx,Akt1,Emd,Braf,Dnmt1,Mapk14,Hspb1,Cd44,Snx6,Arpc2,Ctnnb1,Tgfbr1,Coro1b,Bmp7,Mapkapk2,Pfn1,Ctgf,Egfr,Gnb2l1,Ddx5,Ppm1a,Fos,Fst,Fgf9,Spry2,Nus1,Bambi,Smad4,Ehd1,Ppp2r5b,Ankrd1,Rela,Gfra1,Smad7,Parp1,Acvr1c,Cat,Ext2,Ehd4,Stmn2,Smad9,Lef1,Gclm,Cpne3,Tnfrsf1b,Rab35,Rps3,Sfrp1,Star,Hpgd,Cdh5,Gclc,Dstyk,Cbl,Micall1,Eef1a1,Scx,Ndn,Fgf1,Garem,Oprd1,Mtss1l,Mapk3,Flrt3,Erbb2,Fut8,A…	1.86e-05	0.00069	Cellular response to growth factor stimulus	24.6187
Process	GO:0051046	175	785	10090	10090.ENSMUSP00000000186,10090.ENSMUSP00000000199,10090.ENSMUSP00000000299,10090.ENSMUSP00000000939,10090.ENSMUSP00000001507,10090.ENSMUSP00000001963,10090.ENSMUSP00000002320,10090.ENSMUSP00000002487,10090.ENSMUSP00000005073,10090.ENSMUSP00000005255,10090.ENSMUSP00000005509,10090.ENSMUSP00000006181,10090.ENSMUSP00000009003,10090.ENSMUSP00000009157,10090.ENSMUSP00000017590,10090.ENSMUSP00000017799…	Fgf23,Ncs1,Itgb2,Hip1r,Cyp51,Ace,Ppard,Braf,Zp3,Wisp1,Stx1a,Napa,Rala,Dynll1,C1qtnf1,Cd40,Adora2b,Atp6ap1,Gipc1,Vip,Mcu,Avpr1a,Egfr,Pfkl,Igfbp3,Adcy1,Srebf1,Sdc1,Map2k6,Rsad2,Rab10,Slc9a3r1,Slc6a4,Rab15,Hif1a,Chga,Hmgcr,F2rl1,Glud1,Rgcc,Dpysl2,Adcy8,Asic1,Slc4a8,Abcg1,Syt4,Gabbr1,Smad4,Ankrd1,Apba1,Cpt1a,Gal,Casp1,Ecrg4,Tnfrsf11a,Acvr1c,Snap25,Napb,Anxa5,Ppid,Serp1,Sdcbp,Tnfrsf1b,Pink1,Cdk5,Cd38,…	1.86e-05	0.00069	Regulation of secretion	22.293
Process	GO:0040013	84	314	10090	10090.ENSMUSP00000000127,10090.ENSMUSP00000000542,10090.ENSMUSP00000000641,10090.ENSMUSP00000001592,10090.ENSMUSP00000001780,10090.ENSMUSP00000002320,10090.ENSMUSP00000002487,10090.ENSMUSP00000002708,10090.ENSMUSP00000004326,10090.ENSMUSP00000004646,10090.ENSMUSP00000007959,10090.ENSMUSP00000008893,10090.ENSMUSP00000009530,10090.ENSMUSP00000015858,10090.ENSMUSP00000020702,10090.ENSMUSP00000021077…	Wnt3,Acvrl1,Sema4f,Jup,Akt1,Ppard,Braf,Shh,Plxna3,Coro1c,Rhoa,Coro1b,Timp1,Cers2,Igfbp3,Slc9a3r1,Rgcc,Robo1,Cyp1b1,Dpysl3,Fas,Slit1,Acvr1c,Jag1,Spred1,Sema3c,Sema3a,Sema3d,Wasl,Nr2f2,Acan,Ilk,Sfrp1,Cx3cl1,Pin1,Fam115a,Scai,Abhd2,Ptpn23,Clic4,Rras,Sema7a,Lrp1,Gadd45a,Thbs1,Dusp10,Hoxa7,Pip5kl1,Nov,Nog,Bmerb1,Arhgdia,Ptprr,Mia3,Sp100,Trib1,Sema5a,Dnaja4,Nf1,Sema3e,Drd2,Stk24,Abr,Ptn,Nfe2l2,Gata3,Os…	1.88e-05	0.0007	Negative regulation of locomotion	26.7516
Process	GO:0070848	118	485	10090	10090.ENSMUSP00000000186,10090.ENSMUSP00000000193,10090.ENSMUSP00000000542,10090.ENSMUSP00000000579,10090.ENSMUSP00000000590,10090.ENSMUSP00000001780,10090.ENSMUSP00000002029,10090.ENSMUSP00000002487,10090.ENSMUSP00000004202,10090.ENSMUSP00000004990,10090.ENSMUSP00000005077,10090.ENSMUSP00000005218,10090.ENSMUSP00000005798,10090.ENSMUSP00000006467,10090.ENSMUSP00000007130,10090.ENSMUSP00000007757…	Fgf23,Ccl2,Acvrl1,Sox9,Rdx,Akt1,Emd,Braf,Dnmt1,Mapk14,Hspb1,Cd44,Snx6,Arpc2,Ctnnb1,Tgfbr1,Coro1b,Bmp7,Elk1,Mapkapk2,Pfn1,Dusp6,Ctgf,Ascl1,Egfr,Gnb2l1,Ddx5,Ppm1a,Fos,Fst,Fgf9,Spry2,Nus1,Bambi,Smad4,Ehd1,Ppp2r5b,Ankrd1,Rela,Gfra1,Smad7,Parp1,Acvr1c,Cat,Ext2,Ehd4,Stmn2,Smad9,Lef1,Gclm,Cpne3,Tnfrsf1b,Rab35,Rps3,Sfrp1,Star,Hpgd,Cdh5,Gclc,Dstyk,Lum,Cbl,Micall1,Eef1a1,Scx,Ndn,Fgf1,Garem,Oprd1,Mtss1l,Map…	1.92e-05	0.00071	Response to growth factor	24.3299
Process	GO:0061458	117	480	10090	10090.ENSMUSP00000000579,10090.ENSMUSP00000001780,10090.ENSMUSP00000002284,10090.ENSMUSP00000002320,10090.ENSMUSP00000002708,10090.ENSMUSP00000003320,10090.ENSMUSP00000004990,10090.ENSMUSP00000005066,10090.ENSMUSP00000005218,10090.ENSMUSP00000006235,10090.ENSMUSP00000006367,10090.ENSMUSP00000007130,10090.ENSMUSP00000007757,10090.ENSMUSP00000009143,10090.ENSMUSP00000010278,10090.ENSMUSP00000011029…	Sox9,Akt1,Plaur,Ppard,Shh,Eif2b5,Mapk14,Map2k1,Cd44,Ctsb,Htra1,Ctnnb1,Tgfbr1,Bmp7,Wdr77,Dnajc19,Adam19,Serpinb6a,Slc22a5,Egfr,Sdc1,Grb2,Hif1a,Fst,Fgf9,Bcl2l2,Angpt1,Lrrc6,Vdr,Adamts1,Sod1,Dhh,Smad4,Prdx3,Prdx4,Mmp19,Rdh10,Lhx4,Cst3,Ptx3,Wnt2b,Lef1,Cyr61,Tesc,Ybx3,Lrp6,Fkbp4,Nr2f2,Nsdhl,Sfrp1,Star,Egln1,Fem1b,Six4,Rxrb,Ube2q1,Hey1,Dhcr24,Hnrnpk,Cbl,Erf,Wdr48,Syde1,Amh,Scx,Dicer1,Pcyt1b,Akap9,Ndp,F…	1.94e-05	0.00072	Reproductive system development	24.375
Process	GO:1990778	70	247	10090	10090.ENSMUSP00000000590,10090.ENSMUSP00000001592,10090.ENSMUSP00000003442,10090.ENSMUSP00000003971,10090.ENSMUSP00000015791,10090.ENSMUSP00000019290,10090.ENSMUSP00000021001,10090.ENSMUSP00000021077,10090.ENSMUSP00000021459,10090.ENSMUSP00000023334,10090.ENSMUSP00000024860,10090.ENSMUSP00000025684,10090.ENSMUSP00000025786,10090.ENSMUSP00000026670,10090.ENSMUSP00000027693,10090.ENSMUSP00000028727…	Rdx,Jup,Cacnb3,Lin7b,Lama5,Cacng2,Rab10,Slc9a3r1,Rab15,Pvrl3,Ehd3,Ehd1,Pacs1,Nptx1,Rab29,Snap25,Ehd4,Fam126a,Nsg1,Tesc,Lrp6,Tnfrsf1a,Stx4a,Fgf13,Anxa2,Atp1b3,Gak,S100a10,Clstn1,Cplx1,Zdhhc2,Cd81,Pacsin1,Tspan33,Tspan15,Gpr158,Rilpl1,Golph3,Kcnb1,Ezr,Rab31,Shisa6,Nptx2,Flot2,Myo5b,Rac1,Cacng3,Mex3b,Fyb,Stxbp1,Ank3,Cacng7,Zdhhc22,Ramp1,Ehd2,Mapk10,Grin2a,Golga7,Dpp6,Ank1,Rapgef2,Mllt4,Macf1,Exoc5,K…	1.96e-05	0.00072	Protein localization to cell periphery	28.3401
Component	GO:0031253	92	354	10090	10090.ENSMUSP00000000122,10090.ENSMUSP00000000572,10090.ENSMUSP00000000939,10090.ENSMUSP00000001126,10090.ENSMUSP00000001548,10090.ENSMUSP00000001963,10090.ENSMUSP00000004646,10090.ENSMUSP00000005218,10090.ENSMUSP00000006467,10090.ENSMUSP00000007130,10090.ENSMUSP00000007959,10090.ENSMUSP00000018993,10090.ENSMUSP00000019044,10090.ENSMUSP00000020107,10090.ENSMUSP00000020930,10090.ENSMUSP00000020997…	Ngfr,Gabra2,Hip1r,Slc46a1,Itga3,Ace,Coro1c,Cd44,Arpc2,Ctnnb1,Rhoa,Wwc1,Slc22a5,Atp2b1,Gna13,Sh3yl1,Slc9a3r1,Cdhr1,Spry2,Robo1,Ehd3,Gabbr1,Ehd1,Podxl,Unc5a,Entpd2,Mapre1,Slc7a11,B4galt1,Tln1,Pdpn,Gabrg1,Tesc,Rab35,Fscn1,Abcg2,Gabarapl1,Rps3,Pak1,Atp6ap2,Vezt,Jcad,Kcna2,Eef1a1,Pacsin1,Kcnk1,Dagla,Gpi1,Oprd1,Mtss1l,Sh3bp1,Eps8,Fzd9,Cdc42,Arf6,BC030336,Kcnb1,Mtmr9,Them4,Ezr,Gabrg2,Slc39a6,Prkcb,Shisa…	1.98e-05	0.00031	Cell projection membrane	25.9887
Process	GO:0030516	40	112	10090	10090.ENSMUSP00000000127,10090.ENSMUSP00000000641,10090.ENSMUSP00000004326,10090.ENSMUSP00000015137,10090.ENSMUSP00000018651,10090.ENSMUSP00000018880,10090.ENSMUSP00000022629,10090.ENSMUSP00000025993,10090.ENSMUSP00000030568,10090.ENSMUSP00000030714,10090.ENSMUSP00000030814,10090.ENSMUSP00000030862,10090.ENSMUSP00000030868,10090.ENSMUSP00000031229,10090.ENSMUSP00000033040,10090.ENSMUSP00000033182…	Wnt3,Sema4f,Plxna3,Limk1,Trpv2,Ndel1,Dpysl2,Slit1,Sema3c,Sema3a,Cdk5,Draxin,Sema3d,Rufy3,Pak1,Ilk,Sema7a,Lrp1,Ttl,Map3k13,Trpc5,Dscam,Ptprs,Ep300,Sema5a,Sema3e,Myo5b,Map2,Cdkl5,Adnp,Cttn,Rtn4,L1cam,Tnr,Plxna4,Disc1,Rnf6,Slit2,Sema6b,Actr3	2e-05	0.00074	Regulation of axon extension	35.7143
Keyword	KW-0723	99	389	10090	10090.ENSMUSP00000000542,10090.ENSMUSP00000001115,10090.ENSMUSP00000001780,10090.ENSMUSP00000002087,10090.ENSMUSP00000002487,10090.ENSMUSP00000003313,10090.ENSMUSP00000004281,10090.ENSMUSP00000004920,10090.ENSMUSP00000004990,10090.ENSMUSP00000005066,10090.ENSMUSP00000007757,10090.ENSMUSP00000015137,10090.ENSMUSP00000016323,10090.ENSMUSP00000016672,10090.ENSMUSP00000020220,10090.ENSMUSP00000020949…	Acvrl1,Grk6,Akt1,Pnck,Braf,Grk5,Dyrk2,Ulk2,Mapk14,Map2k1,Tgfbr1,Limk1,Camk1g,Mapkapk2,Nuak1,Map2k6,Plk2,Lats2,Pak2,Rps6ka2,Pkmyt1,Pim1,Eif2ak2,Riok3,Rps6kb2,Map4k2,Stk17b,Uhmk1,Mastl,Acvr1c,Hipk1,Prkaa2,Pink1,Map3k6,Cdk5,Camk1,Pak1,Ilk,Pim2,Dstyk,Gak,Camk1d,Bmp2k,Brsk1,Mapk6,Map2k4,Map3k9,Oxsr1,Cdc42bpb,Rps6ka5,Ttbk1,Pim3,Prkx,Camk4,Map3k13,Ick,Nek9,Mapk3,Nek4,Ulk3,Pik3cg,Prkcb,Csnk1g3,Cdk17,Stk2…	2e-05	0.00035	Serine/threonine-protein kinase	25.4499
Component	GO:0031300	99	389	10090	10090.ENSMUSP00000000572,10090.ENSMUSP00000005509,10090.ENSMUSP00000006557,10090.ENSMUSP00000009727,10090.ENSMUSP00000019143,10090.ENSMUSP00000020312,10090.ENSMUSP00000021001,10090.ENSMUSP00000021930,10090.ENSMUSP00000022197,10090.ENSMUSP00000022378,10090.ENSMUSP00000022881,10090.ENSMUSP00000023040,10090.ENSMUSP00000023441,10090.ENSMUSP00000025110,10090.ENSMUSP00000025197,10090.ENSMUSP00000025713…	Gabra2,Stx1a,Elovl1,Syngr1,Slc35b4,Mcu,Rab10,Sfxn1,Scamp1,Ero1l,Fam134b,Slc25a17,P2rx6,Syt4,Tap2,Tm7sf2,Cpt1a,Fundc1,Scd3,Scd2,Esyt1,Apool,Abcb6,Stx6,Atf6,Emc4,Sppl2a,Sec62,Ccdc109b,Slc35a1,Pink1,Stx12,Coq2,Ankle2,Rab35,Tmem43,Slc17a6,Dgat2,Timm17b,Fundc2,Tmem66,Emc8,Tpst1,Scamp5,Sppl2b,Scd1,Clstn1,Atp13a2,Acer2,Sfxn5,Zdhhc9,Bet1,Slc22a17,Oprd1,Rnf152,Xxylt1,Mmgt1,Slc38a9,Amfr,Lamp2,Zmpste24,Abhd…	2e-05	0.00031	Intrinsic component of organelle membrane	25.4499
Component	GO:0005802	64	219	10090	10090.ENSMUSP00000002063,10090.ENSMUSP00000003117,10090.ENSMUSP00000004968,10090.ENSMUSP00000009219,10090.ENSMUSP00000009234,10090.ENSMUSP00000020350,10090.ENSMUSP00000020420,10090.ENSMUSP00000020537,10090.ENSMUSP00000021001,10090.ENSMUSP00000021201,10090.ENSMUSP00000021285,10090.ENSMUSP00000021380,10090.ENSMUSP00000022197,10090.ENSMUSP00000023064,10090.ENSMUSP00000025590,10090.ENSMUSP00000027693…	Ap4e1,Ap1m1,Plod3,Cabp7,Ap1b1,Lgr5,Ap3d1,Nsg2,Rab10,Cpd,Stx8,Trappc6b,Scamp1,Cby1,Osbp,Rab29,Stx6,Snap25,Adc,Nsg1,Ccdc91,Rab30,Rab6a,Stx4a,Nucb1,Chst5,Bsn,Clvs1,Scamp5,Fam91a1,BC022687,Chst2,Nmnat2,March9,Cnst,Coro7,Lamp2,Gcc2,Pam,Golph3,Sorl1,Vps53,Adam10,Rab7b,Pld4,Rab31,Pi4k2a,Slc9a7,Ap3s2,Atp8a2,Rac1,Impad1,Caln1,Stx16,Cltb,Arfgef2,Car4,5730455P16Rik,Lrba,Atp9a,Klhl20,Plekha8,Ift88,Golph3l	2.01e-05	0.00031	trans-Golgi network	29.2237
Process	GO:0030036	120	496	10090	10090.ENSMUSP00000000939,10090.ENSMUSP00000002889,10090.ENSMUSP00000003451,10090.ENSMUSP00000003575,10090.ENSMUSP00000004646,10090.ENSMUSP00000005234,10090.ENSMUSP00000006467,10090.ENSMUSP00000007959,10090.ENSMUSP00000008893,10090.ENSMUSP00000009003,10090.ENSMUSP00000010298,10090.ENSMUSP00000015137,10090.ENSMUSP00000016143,10090.ENSMUSP00000016771,10090.ENSMUSP00000018437,10090.ENSMUSP00000020312…	Hip1r,Flii,Rnd1,Tpm4,Coro1c,Wdr1,Arpc2,Rhoa,Coro1b,Rala,Spire2,Limk1,Wasf3,Myh9,Pfn1,Mcu,Slc9a3r1,Coro6,Fam101b,Cap2,Twf1,Bcl6,Cxadr,Rhoq,Pfdn1,Epb4.1l4a,Dpysl3,Farp1,Mkln1,Gsn,Ptpn1,Cnn3,Sdcbp,Epb4.1l4b,Tln1,Lurap1,Cdk5,Rufy3,Sdad1,Fscn1,Wasl,Add2,Pak1,Sfrp1,Six4,Foxj1,Micall2,Thsd7a,Ina,Fhod3,Rhov,Micall1,Cdc42bpb,Syde1,Pacsin1,Prkcdbp,Fmnl1,Coro7,Mical2,Sh3bp1,Frmd6,Clrn1,Eps8,S1pr2,Cdc42,Arf6…	2.02e-05	0.00074	Actin cytoskeleton organization	24.1935
COMPARTMENTS	GOCC:0030027	51	160	10090	10090.ENSMUSP00000000590,10090.ENSMUSP00000004646,10090.ENSMUSP00000005218,10090.ENSMUSP00000006467,10090.ENSMUSP00000007130,10090.ENSMUSP00000007959,10090.ENSMUSP00000008893,10090.ENSMUSP00000015137,10090.ENSMUSP00000016143,10090.ENSMUSP00000018651,10090.ENSMUSP00000021217,10090.ENSMUSP00000025379,10090.ENSMUSP00000026122,10090.ENSMUSP00000026698,10090.ENSMUSP00000028239,10090.ENSMUSP00000028727…	Rdx,Coro1c,Cd44,Arpc2,Ctnnb1,Rhoa,Coro1b,Limk1,Wasf3,Trpv2,Nme2,Dpysl3,P4hb,Podxl,Gsn,Snap25,Stmn2,Pdpn,Cdk5,Tesc,Fscn1,Wasl,Pak1,Stx4a,Ilk,Sh3rf1,Snx2,Mtss1l,Sh3bp1,Clrn1,Cdc42,Abi3,Slc39a6,Tubb3,Tmod3,Flot2,Arpc5,Rac1,Wasf2,Actb,Cttn,Plcg1,Unc5c,Nf2,Myo10,Arhgef7,Tsc1,Cfl1,Palld,Bcar1,Actr3	2.1e-05	0.00056	Lamellipodium	31.875
Process	GO:0001525	86	325	10090	10090.ENSMUSP00000000193,10090.ENSMUSP00000000542,10090.ENSMUSP00000001319,10090.ENSMUSP00000001780,10090.ENSMUSP00000001963,10090.ENSMUSP00000002708,10090.ENSMUSP00000004208,10090.ENSMUSP00000004990,10090.ENSMUSP00000005279,10090.ENSMUSP00000007130,10090.ENSMUSP00000007757,10090.ENSMUSP00000008542,10090.ENSMUSP00000016771,10090.ENSMUSP00000019723,10090.ENSMUSP00000020171,10090.ENSMUSP00000020930…	Ccl2,Acvrl1,Efnb2,Akt1,Ace,Shh,Angptl2,Mapk14,Klf5,Ctnnb1,Tgfbr1,Elk3,Myh9,D17Wsu104e,Ctgf,Gna13,Hif1a,Fgf9,Loxl2,Ywhaz,Angpt1,Robo1,Nus1,Cyp1b1,Mmp19,Lef1,Apoa1bp,Cyr61,B4galt1,Tgfa,Gpr124,Col4a1,Cx3cl1,Mcam,Anxa2,Vav3,Fzd8,Thsd7a,Clic4,Dicer1,Thbs1,Prkx,Fgf1,AF529169,Gbx2,Hoxa7,Nov,Cdc42,Rhoj,Shb,Vav2,Pik3cg,Mia3,Sema5a,Ackr3,Actg1,Sema3e,Notch2,Gpx1,Wasf2,Glul,Notch3,Hs6st1,Srpk2,Col8a1,Mmp14,…	2.1e-05	0.00077	Angiogenesis	26.4615
Process	GO:0048608	116	476	10090	10090.ENSMUSP00000000579,10090.ENSMUSP00000001780,10090.ENSMUSP00000002284,10090.ENSMUSP00000002320,10090.ENSMUSP00000002708,10090.ENSMUSP00000003320,10090.ENSMUSP00000004990,10090.ENSMUSP00000005066,10090.ENSMUSP00000005218,10090.ENSMUSP00000006235,10090.ENSMUSP00000006367,10090.ENSMUSP00000007130,10090.ENSMUSP00000007757,10090.ENSMUSP00000009143,10090.ENSMUSP00000010278,10090.ENSMUSP00000011029…	Sox9,Akt1,Plaur,Ppard,Shh,Eif2b5,Mapk14,Map2k1,Cd44,Ctsb,Htra1,Ctnnb1,Tgfbr1,Bmp7,Wdr77,Dnajc19,Adam19,Serpinb6a,Slc22a5,Egfr,Sdc1,Grb2,Hif1a,Fst,Fgf9,Bcl2l2,Angpt1,Lrrc6,Vdr,Adamts1,Sod1,Dhh,Smad4,Prdx3,Prdx4,Mmp19,Rdh10,Lhx4,Cst3,Ptx3,Wnt2b,Lef1,Cyr61,Tesc,Ybx3,Lrp6,Fkbp4,Nr2f2,Nsdhl,Sfrp1,Star,Egln1,Fem1b,Six4,Rxrb,Hey1,Dhcr24,Hnrnpk,Cbl,Erf,Wdr48,Syde1,Amh,Scx,Dicer1,Pcyt1b,Akap9,Ndp,Fbxw8,Ti…	2.11e-05	0.00077	Reproductive structure development	24.3697
Process	GO:0045926	73	262	10090	10090.ENSMUSP00000000127,10090.ENSMUSP00000000542,10090.ENSMUSP00000000641,10090.ENSMUSP00000002320,10090.ENSMUSP00000004326,10090.ENSMUSP00000004327,10090.ENSMUSP00000004920,10090.ENSMUSP00000005647,10090.ENSMUSP00000008528,10090.ENSMUSP00000018966,10090.ENSMUSP00000018993,10090.ENSMUSP00000019911,10090.ENSMUSP00000020640,10090.ENSMUSP00000021195,10090.ENSMUSP00000021530,10090.ENSMUSP00000022701…	Wnt3,Acvrl1,Sema4f,Ppard,Plxna3,G6pdx,Ulk2,Ndufs3,Sertad1,Sfrp5,Wwc1,Hdac2,Gnb2l1,Slc6a4,Hif1a,Rb1,Bcl6,Cxadr,Smad4,Smarca2,Slit1,Frzb,Ppt1,Cda,Sema3c,Sema3a,Cdk5,Draxin,Sema3d,Cgref1,Pak1,Fgf13,Sfrp1,Dcbld2,Sema7a,Dusp10,AF529169,Nov,Wwc2,Nog,Ptprs,Slit3,Sh3bp4,Sema5a,Cgrrf1,Rai1,Foxk1,Sema3e,Map2,Notch2,Dab2,Cdkn2d,Mapk11,Rgma,Rtn4,Dact3,Ppara,Nf2,Prdm11,Caprin2,Tnr,Adipor1,Bcl2,Cfl1,Rerg,Cth,R…	2.12e-05	0.00077	Negative regulation of growth	27.8626
Process	GO:0010638	141	606	10090	10090.ENSMUSP00000000642,10090.ENSMUSP00000000939,10090.ENSMUSP00000001452,10090.ENSMUSP00000002284,10090.ENSMUSP00000002303,10090.ENSMUSP00000002487,10090.ENSMUSP00000004202,10090.ENSMUSP00000004326,10090.ENSMUSP00000005234,10090.ENSMUSP00000006467,10090.ENSMUSP00000006912,10090.ENSMUSP00000007130,10090.ENSMUSP00000007757,10090.ENSMUSP00000007959,10090.ENSMUSP00000009157,10090.ENSMUSP00000010298…	Hk2,Hip1r,Cct3,Plaur,Rhoc,Braf,Dnmt1,Plxna3,Wdr1,Arpc2,Pip4k2a,Ctnnb1,Tgfbr1,Rhoa,Dynll1,Spire2,Pip4k2c,Surf4,Limk1,Setdb1,Wasf3,Mmp9,Pfn1,Pip4k2b,G3bp1,Ctgf,Mcu,Drg1,Srebf1,Sdc1,Grb2,Snw1,Hif1a,F2rl1,Rgcc,Rb1,Cct5,Mief1,Bcl6,March5,Smad4,Pmaip1,Fas,Huwe1,Cct8,Ppm1f,Gsn,Mapre1,Stmn2,Lmna,Ubxn2b,Sdcbp,Pink1,Tomm7,Wrap73,Anapc4,Cct6a,Fscn1,Wasl,Tgfa,Atf7ip,Fchsd2,Rps3,Pak1,Tnks,Cx3cl1,Anxa2,Phip,S1…	2.12e-05	0.00077	Positive regulation of organelle organization	23.2673
Process	GO:0050772	38	104	10090	10090.ENSMUSP00000000127,10090.ENSMUSP00000001347,10090.ENSMUSP00000002487,10090.ENSMUSP00000004326,10090.ENSMUSP00000005066,10090.ENSMUSP00000015137,10090.ENSMUSP00000018651,10090.ENSMUSP00000018880,10090.ENSMUSP00000022639,10090.ENSMUSP00000023600,10090.ENSMUSP00000024099,10090.ENSMUSP00000031229,10090.ENSMUSP00000033040,10090.ENSMUSP00000033182,10090.ENSMUSP00000034164,10090.ENSMUSP00000042211…	Wnt3,Rnd2,Braf,Plxna3,Map2k1,Limk1,Trpv2,Ndel1,Nefl,Robo1,Ache,Rufy3,Pak1,Ilk,Ist1,Sema7a,Lrp1,Map3k13,Trpc5,Plxnb2,Dscam,Ep300,Sema5a,Myo5b,Tubb2b,Efna5,Cdkl5,Adnp,Snap91,Plxnc1,Slitrk1,Cttn,Rtn4,L1cam,Amigo1,Plxna4,Disc1,Plxna1	2.13e-05	0.00077	Positive regulation of axonogenesis	36.5385
Process	GO:1901615	105	420	10090	10090.ENSMUSP00000000186,10090.ENSMUSP00000001507,10090.ENSMUSP00000003850,10090.ENSMUSP00000004327,10090.ENSMUSP00000005003,10090.ENSMUSP00000006235,10090.ENSMUSP00000006692,10090.ENSMUSP00000006949,10090.ENSMUSP00000008579,10090.ENSMUSP00000015950,10090.ENSMUSP00000018803,10090.ENSMUSP00000020217,10090.ENSMUSP00000020241,10090.ENSMUSP00000020846,10090.ENSMUSP00000020864,10090.ENSMUSP00000021424…	Fgf23,Cyp51,Itpkc,G6pdx,Lbr,Ctsb,Mvd,Tph2,Rdh13,Qdpr,Pnpo,Nudt4,Pah,Srebf1,Pctp,Sptlc2,Sgpp1,Hif1a,Npc2,Cyp46a1,Hmgcr,Dhfr,Sqle,Aco2,Pde1b,Nus1,Glo1,Abcg1,Cyp1b1,Nudt3,Aldh1a7,Tm7sf2,Cyp26a1,Rdh5,Hprt,Rdh10,Cyp27a1,Cln8,Bpnt1,Cat,Hao1,Lrat,Abca1,Gba2,Prkaa2,Akr1a1,Coq2,Aldh2,Mtpn,Ldhb,Fah,Dgat2,Crym,Ebp,Nsdhl,Star,Msmo1,Ldlr,Hsd3b7,Sgpp2,Dhcr24,Ptchd2,Pdxk,Pck2,Acer2,Akr1b8,Smpd1,Sncb,Mtmr7,Lrp1,…	2.13e-05	0.00077	Organic hydroxy compound metabolic process	25
Function	GO:0016773	151	659	10090	10090.ENSMUSP00000000542,10090.ENSMUSP00000000642,10090.ENSMUSP00000001115,10090.ENSMUSP00000001780,10090.ENSMUSP00000002087,10090.ENSMUSP00000002487,10090.ENSMUSP00000003313,10090.ENSMUSP00000003850,10090.ENSMUSP00000004281,10090.ENSMUSP00000004920,10090.ENSMUSP00000004990,10090.ENSMUSP00000005066,10090.ENSMUSP00000006912,10090.ENSMUSP00000007757,10090.ENSMUSP00000013970,10090.ENSMUSP00000015137…	Acvrl1,Hk2,Grk6,Akt1,Pnck,Braf,Grk5,Itpkc,Dyrk2,Ulk2,Mapk14,Map2k1,Pip4k2a,Tgfbr1,Pip4k2c,Limk1,Camk1g,Mapkapk2,Pip4k2b,Pank3,Nrbp2,Nuak1,Egfr,Pfkl,Map2k6,Nme2,Plk2,Lats2,Twf1,Pak2,Rps6ka2,Pkmyt1,Pim1,Eif2ak2,Riok3,Rfk,Rps6kb2,Map4k2,Fn3k,Stk17b,Uhmk1,Mastl,Acvr1c,Hipk1,Cpne3,Ikbkap,Npr2,Prkaa2,Pink1,Map3k6,Prkag2,Cdk5,Ret,Camk1,Pak1,Ilk,Wee1,Pim2,Dstyk,Prkab2,Pdk3,Gak,Camk1d,Bmp2k,Fn3krp,Pdxk,Fl…	2.14e-05	0.0014	Phosphotransferase activity, alcohol group as acceptor	22.9135
COMPARTMENTS	GOCC:0055038	23	46	10090	10090.ENSMUSP00000005256,10090.ENSMUSP00000017783,10090.ENSMUSP00000022197,10090.ENSMUSP00000023486,10090.ENSMUSP00000024860,10090.ENSMUSP00000025684,10090.ENSMUSP00000025875,10090.ENSMUSP00000028755,10090.ENSMUSP00000031009,10090.ENSMUSP00000034713,10090.ENSMUSP00000035007,10090.ENSMUSP00000035898,10090.ENSMUSP00000041727,10090.ENSMUSP00000042053,10090.ENSMUSP00000045222,10090.ENSMUSP00000055862…	Ndrg1,Rab11fip4,Scamp1,Tfrc,Ehd3,Ehd1,Slc1a1,Ehd4,Nsg1,Ldlr,Cmtm6,Scamp5,Zdhhc2,Micall1,Neu3,Arf6,Abhd17b,Vti1b,Slc9a7,Rac1,Ehd2,Atp9a,Fzd7	2.16e-05	0.00056	Recycling endosome membrane	50
RCTM	MMU-1630316	42	121	10090	10090.ENSMUSP00000002412,10090.ENSMUSP00000005218,10090.ENSMUSP00000015171,10090.ENSMUSP00000020911,10090.ENSMUSP00000021822,10090.ENSMUSP00000022169,10090.ENSMUSP00000026262,10090.ENSMUSP00000028623,10090.ENSMUSP00000030121,10090.ENSMUSP00000030669,10090.ENSMUSP00000032835,10090.ENSMUSP00000032892,10090.ENSMUSP00000033050,10090.ENSMUSP00000034197,10090.ENSMUSP00000034430,10090.ENSMUSP00000034537…	Ncan,Cd44,Galns,Sdc1,Ogn,Hexb,Hexa,Ext2,B4galt1,Slc9a1,Acan,Xylt1,Lyve1,St3gal2,Chst5,St3gal4,Chst2,Lum,Hs2st1,Gns,Dsel,Chst11,Gpc1,Has2,Cemip,Sdc3,B4galt6,Hs6st2,Hs6st1,Bcan,Arsb,St3gal1,Slc35d2,Ids,Kera,Dcn,Hs3st4,B4galt5,Xylt2,B3gat1,Ndst4,Gpc5	2.19e-05	0.0021	Glycosaminoglycan metabolism	34.7107
COMPARTMENTS	GOCC:0098797	146	633	10090	10090.ENSMUSP00000000001,10090.ENSMUSP00000000058,10090.ENSMUSP00000000299,10090.ENSMUSP00000000542,10090.ENSMUSP00000001548,10090.ENSMUSP00000001592,10090.ENSMUSP00000001780,10090.ENSMUSP00000002848,10090.ENSMUSP00000003038,10090.ENSMUSP00000003442,10090.ENSMUSP00000003550,10090.ENSMUSP00000003971,10090.ENSMUSP00000004646,10090.ENSMUSP00000007130,10090.ENSMUSP00000007757,10090.ENSMUSP00000009875…	Gnai3,Cav2,Itgb2,Acvrl1,Itga3,Jup,Akt1,Grin2d,Ap2a2,Cacnb3,Ncstn,Lin7b,Coro1c,Ctnnb1,Tgfbr1,Kcnd1,Cd40,Atp6ap1,Cacng2,Il20ra,Mcu,Gna13,Slc9a3r1,Grb2,Ryr2,Micu2,Cacna2d3,Tfrc,Ifnar1,Xdh,Gabbr1,Gnal,Gna14,Fas,Cnih2,Gfra1,Itgb8,Gria4,Acvr1c,Itga6,Snap25,Jag1,Ccdc109b,Glrb,Sdcbp,Abca1,Mmachc,Grik3,Ret,Lrp6,Sspn,Abcc8,Il13ra1,Cdh5,Atp1b3,Myd88,Cdh6,Kcnj2,Grm1,Irs2,Atp1a1,Fzd8,Sntb1,Kcna2,Gng10,Psenen,…	2.21e-05	0.00057	Plasma membrane protein complex	23.0648
RCTM	MMU-194315	97	381	10090	10090.ENSMUSP00000001513,10090.ENSMUSP00000002303,10090.ENSMUSP00000003971,10090.ENSMUSP00000004990,10090.ENSMUSP00000006467,10090.ENSMUSP00000006618,10090.ENSMUSP00000007130,10090.ENSMUSP00000007959,10090.ENSMUSP00000009157,10090.ENSMUSP00000015137,10090.ENSMUSP00000016143,10090.ENSMUSP00000016771,10090.ENSMUSP00000018437,10090.ENSMUSP00000018470,10090.ENSMUSP00000018880,10090.ENSMUSP00000020775…	Tubb6,Rhoc,Lin7b,Mapk14,Arpc2,Arhgef19,Ctnnb1,Rhoa,Dynll1,Limk1,Wasf3,Myh9,Pfn1,Ywhab,Ndel1,Dynll2,Gna13,Grb2,Rhobtb2,Ywhaz,Pak2,Arhgap28,Rhoq,Arhgdig,Seh1l,Ppp2r5b,Arhgap19,Ahctf1,Depdc7,Mapre1,Nudc,Wasl,Tuba8,Pak1,Pin1,Vav3,Scai,Cenpt,Arhgap27,Arhgef11,Rhov,Syde1,Fmnl1,Tax1bp3,Tuba1c,Mapk3,Ar,Cdc42,Arhgap15,Nup160,Depdc1b,Rhoj,Tubb2a,Vav2,Nup107,Arhgdia,Arhgap20,Sos1,Ppp1r12a,Prkcb,Ywhae,Tubb3,…	2.38e-05	0.0021	Signaling by Rho GTPases	25.4593
COMPARTMENTS	GOCC:0042734	55	179	10090	10090.ENSMUSP00000000109,10090.ENSMUSP00000001319,10090.ENSMUSP00000003550,10090.ENSMUSP00000005509,10090.ENSMUSP00000007130,10090.ENSMUSP00000020107,10090.ENSMUSP00000021195,10090.ENSMUSP00000023007,10090.ENSMUSP00000024099,10090.ENSMUSP00000025338,10090.ENSMUSP00000025830,10090.ENSMUSP00000028727,10090.ENSMUSP00000028951,10090.ENSMUSP00000033915,10090.ENSMUSP00000034510,10090.ENSMUSP00000037255…	Cntn1,Efnb2,Ncstn,Stx1a,Ctnnb1,Atp2b1,Slc6a4,Adcy8,Ache,Gabbr1,Apba1,Snap25,Snph,Gpm6a,Pvrl1,Grm1,Exoc3,Kcna2,Psenen,Igsf21,Htr2a,Oprd1,Adra1a,Kcna1,Kcnj9,Grin2b,Kcnj3,Ptprs,Rgs7bp,Pi4k2a,Flot2,Otof,Drd2,Gria3,Scn1a,Scn8a,Cntn6,Erc2,Stxbp1,Cltb,Snap91,L1cam,Ephb2,Gabbr2,Kcnc3,Cadm3,Grik4,Grin2a,Grm4,Erbb4,Stxbp5,Prrt2,Ncam1,Htr1b,Chrm3	2.4e-05	0.0006	Presynaptic membrane	30.7263
Component	GO:0030027	60	202	10090	10090.ENSMUSP00000000590,10090.ENSMUSP00000001809,10090.ENSMUSP00000004646,10090.ENSMUSP00000005218,10090.ENSMUSP00000006467,10090.ENSMUSP00000007130,10090.ENSMUSP00000007959,10090.ENSMUSP00000008893,10090.ENSMUSP00000015137,10090.ENSMUSP00000016143,10090.ENSMUSP00000018651,10090.ENSMUSP00000021217,10090.ENSMUSP00000025379,10090.ENSMUSP00000026122,10090.ENSMUSP00000026698,10090.ENSMUSP00000028239…	Rdx,Pabpc1,Coro1c,Cd44,Arpc2,Ctnnb1,Rhoa,Coro1b,Limk1,Wasf3,Trpv2,Nme2,Dpysl3,P4hb,Podxl,Gsn,Snap25,Stmn2,Pdpn,Cdk5,Rufy3,Tesc,Fscn1,Wasl,Pak1,Stx4a,Ilk,Klhl2,Sh3rf1,Snx1,Snx2,Plekhh2,Kcna2,Cdc42bpb,Acta2,Mtss1l,Sh3bp1,Clrn1,Cdc42,Abi3,Slc39a6,Tubb3,Tmod3,Flot2,Arpc5,Rac1,Wasf2,Itgb1,Actb,Cttn,Plcg1,Unc5c,Nf2,Myo10,Arhgef7,Tsc1,Cfl1,Palld,Bcar1,Actr3	2.42e-05	0.00036	Lamellipodium	29.703
Component	GO:0044309	63	216	10090	10090.ENSMUSP00000000122,10090.ENSMUSP00000000939,10090.ENSMUSP00000006467,10090.ENSMUSP00000007959,10090.ENSMUSP00000018909,10090.ENSMUSP00000019577,10090.ENSMUSP00000023441,10090.ENSMUSP00000023758,10090.ENSMUSP00000025338,10090.ENSMUSP00000025805,10090.ENSMUSP00000025830,10090.ENSMUSP00000025875,10090.ENSMUSP00000026635,10090.ENSMUSP00000027020,10090.ENSMUSP00000029773,10090.ENSMUSP00000029876…	Ngfr,Hip1r,Arpc2,Rhoa,Fxr2,Gipc1,P2rx6,Asic1,Gabbr1,Cnih2,Apba1,Slc1a1,Farp1,Gria4,Cnn3,Calb1,Stx4a,Gpm6a,Snx1,Clstn1,Kcnj2,Grm1,Ppp1ca,Hnrnpk,Prkar2b,Zfp804a,Palmd,Oprd1,Ppp3ca,Cdc42,Abhd17b,Sipa1l1,Lrrc4,Grin2b,Pgr,Adam10,Dnm3,Rgs7bp,Nr1d1,Myo5b,Drd2,Gria3,Ptpro,Homer1,Rph3a,Rac1,Kcnd2,Itgb1,Abr,Arfgef2,Cttn,Hap1,Shank1,Kcnn1,Cntnap2,Grin2a,Cfl1,Abhd17c,Prrt2,Mob4,Bcr,Arhgap32,Lzts1	2.44e-05	0.00036	Neuron spine	29.1667
Process	GO:0043549	186	850	10090	10090.ENSMUSP00000000305,10090.ENSMUSP00000001780,10090.ENSMUSP00000001825,10090.ENSMUSP00000001963,10090.ENSMUSP00000002487,10090.ENSMUSP00000004646,10090.ENSMUSP00000005066,10090.ENSMUSP00000005077,10090.ENSMUSP00000007757,10090.ENSMUSP00000007959,10090.ENSMUSP00000008036,10090.ENSMUSP00000008878,10090.ENSMUSP00000009143,10090.ENSMUSP00000014743,10090.ENSMUSP00000017799,10090.ENSMUSP00000018966…	Tpd52l1,Akt1,Chordc1,Ace,Braf,Coro1c,Map2k1,Hspb1,Tgfbr1,Rhoa,Rplp1,Gprc5b,Bmp7,Csf1,Cd40,Sfrp5,Dusp6,Egfr,Ccng1,Gnb2l1,Trib2,Map2k6,Slc9a3r1,Pik3r5,Ppp2r3c,Gadd45g,Hmgcr,Lats2,Rgcc,Clu,Rb1,Spry2,Angpt1,Adcy8,Pak2,Robo1,Sod1,Pim1,Eif2ak2,Impact,Spry4,Prrc1,Map4k2,Prdx3,Maged1,Nab2,Ppm1f,Tnfrsf11a,Spred1,Ptpn1,Zgpat,Lamtor2,Bcl10,Cyr61,Map3k6,Prkag2,Cdk5,Uchl1,Tesc,Tgfa,Ret,Lrp6,Camk1,Nr2f2,Rps3,P…	2.57e-05	0.00092	Regulation of kinase activity	21.8824
Component	GO:0070382	73	264	10090	10090.ENSMUSP00000000572,10090.ENSMUSP00000002708,10090.ENSMUSP00000003038,10090.ENSMUSP00000003550,10090.ENSMUSP00000005509,10090.ENSMUSP00000007236,10090.ENSMUSP00000009538,10090.ENSMUSP00000009727,10090.ENSMUSP00000018880,10090.ENSMUSP00000019577,10090.ENSMUSP00000020999,10090.ENSMUSP00000021001,10090.ENSMUSP00000021459,10090.ENSMUSP00000022197,10090.ENSMUSP00000022293,10090.ENSMUSP00000023776…	Gabra2,Shh,Ap2a2,Ncstn,Stx1a,Syngr3,Syn2,Syngr1,Ndel1,Gipc1,Kif3c,Rab10,Rab15,Scamp1,Vdac2,Slc4a8,Syt4,Gabbr1,Apba1,Cops5,Stx6,Snap25,Anxa5,Sec22b,Ppt1,Stx12,Rab35,Slc2a3,Slc17a6,Rab6a,Stx4a,Bsn,Scamp5,Kcnk9,Brsk1,Npy1r,Lgi3,Cops4,Oprd1,Svop,Syt12,Vti1b,Grin2b,Adam10,Ptprn2,Ptprs,Pi4k2a,Otof,Drd2,Mff,Rph3a,Mctp2,Stx16,Cltb,Slc5a7,Vti1a,Snap91,Hap1,Calm1,Grin2a,Disc1,Syt2,Syn3,Rab4a,Rab27b,Mctp1,S…	2.61e-05	0.00038	Exocytic vesicle	27.6515
Component	GO:0043197	62	212	10090	10090.ENSMUSP00000000122,10090.ENSMUSP00000000939,10090.ENSMUSP00000006467,10090.ENSMUSP00000007959,10090.ENSMUSP00000018909,10090.ENSMUSP00000019577,10090.ENSMUSP00000023441,10090.ENSMUSP00000023758,10090.ENSMUSP00000025338,10090.ENSMUSP00000025805,10090.ENSMUSP00000025830,10090.ENSMUSP00000025875,10090.ENSMUSP00000026635,10090.ENSMUSP00000027020,10090.ENSMUSP00000029773,10090.ENSMUSP00000029876…	Ngfr,Hip1r,Arpc2,Rhoa,Fxr2,Gipc1,P2rx6,Asic1,Gabbr1,Cnih2,Apba1,Slc1a1,Farp1,Gria4,Cnn3,Calb1,Stx4a,Gpm6a,Snx1,Clstn1,Kcnj2,Grm1,Ppp1ca,Hnrnpk,Prkar2b,Zfp804a,Palmd,Oprd1,Ppp3ca,Cdc42,Abhd17b,Sipa1l1,Lrrc4,Grin2b,Pgr,Adam10,Dnm3,Rgs7bp,Nr1d1,Myo5b,Drd2,Gria3,Ptpro,Homer1,Rph3a,Rac1,Kcnd2,Itgb1,Abr,Arfgef2,Cttn,Hap1,Shank1,Kcnn1,Grin2a,Cfl1,Abhd17c,Prrt2,Mob4,Bcr,Arhgap32,Lzts1	2.63e-05	0.00038	Dendritic spine	29.2453
Process	GO:0001944	132	562	10090	10090.ENSMUSP00000000095,10090.ENSMUSP00000000122,10090.ENSMUSP00000000193,10090.ENSMUSP00000000542,10090.ENSMUSP00000001319,10090.ENSMUSP00000001780,10090.ENSMUSP00000001963,10090.ENSMUSP00000002708,10090.ENSMUSP00000004208,10090.ENSMUSP00000004990,10090.ENSMUSP00000005066,10090.ENSMUSP00000005279,10090.ENSMUSP00000007130,10090.ENSMUSP00000007757,10090.ENSMUSP00000008542,10090.ENSMUSP00000016771…	Tbx2,Ngfr,Ccl2,Acvrl1,Efnb2,Akt1,Ace,Shh,Angptl2,Mapk14,Map2k1,Klf5,Ctnnb1,Tgfbr1,Elk3,Myh9,D17Wsu104e,Ctgf,Gna13,Hif1a,Fgf9,Loxl2,Ywhaz,Angpt1,Robo1,Nus1,Cyp1b1,Zfand5,Smarca2,Slc1a1,Itgb8,Mmp19,Ric8,Chm,Smad7,Jag1,Spred1,Lef1,Apoa1bp,Cyr61,B4galt1,Pdpn,Sema3c,Tgfa,Nr2f2,Nsdhl,Gpr124,Col4a1,Hpgd,Cx3cl1,Cdh5,Mcam,Ldlr,Anxa2,Vav3,Hey1,Fzd8,Thsd7a,Clic4,Syde1,Dicer1,Lama1,Lrp1,Thbs1,Prkx,Fgf1,AF529…	2.65e-05	0.00095	Vasculature development	23.4875
Process	GO:0034097	180	818	10090	10090.ENSMUSP00000000080,10090.ENSMUSP00000000186,10090.ENSMUSP00000000193,10090.ENSMUSP00000000579,10090.ENSMUSP00000000642,10090.ENSMUSP00000001780,10090.ENSMUSP00000001950,10090.ENSMUSP00000002976,10090.ENSMUSP00000004173,10090.ENSMUSP00000004990,10090.ENSMUSP00000005218,10090.ENSMUSP00000005279,10090.ENSMUSP00000006611,10090.ENSMUSP00000007130,10090.ENSMUSP00000007959,10090.ENSMUSP00000009530…	Klf6,Fgf23,Ccl2,Sox9,Hk2,Akt1,Tollip,Il17ra,Cdip1,Mapk14,Cd44,Klf5,Srm,Ctnnb1,Rhoa,Timp1,Syngr1,Cacybp,Csf1,Endog,Fnta,Mapkapk2,Timp2,Cd40,Gipc1,Il20ra,Timp3,Gfpt2,Ccl7,Txndc17,Stx8,Serpina3n,Hif1a,Fos,Gfra2,Spry2,Pmm1,Pde1b,Tfrc,Atp5o,Ifnar1,Il10rb,Tnfrsf21,Eif2ak2,Spry4,Dpysl3,Smad4,Otub1,Fas,Ankrd1,Rela,Stip1,P4hb,Ifitm3,Irf7,Smad7,Casp1,Tnfrsf11a,Vim,Gsn,Entpd2,Nup35,Lef1,Casp6,Lrat,Gclm,Ugcg…	2.66e-05	0.00095	Response to cytokine	22.0049
Process	GO:0043603	156	689	10090	10090.ENSMUSP00000000756,10090.ENSMUSP00000001416,10090.ENSMUSP00000001485,10090.ENSMUSP00000001780,10090.ENSMUSP00000001824,10090.ENSMUSP00000001963,10090.ENSMUSP00000003320,10090.ENSMUSP00000003386,10090.ENSMUSP00000003550,10090.ENSMUSP00000003572,10090.ENSMUSP00000003906,10090.ENSMUSP00000004137,10090.ENSMUSP00000004206,10090.ENSMUSP00000004327,10090.ENSMUSP00000005826,10090.ENSMUSP00000006557…	Rpl13,Hars,Mrpl10,Akt1,Folh1,Ace,Eif2b5,Mrpl4,Ncstn,Gars,Farsa,Gstm7,Eif3g,G6pdx,Cs,Elovl1,Mvd,Eif1b,Rplp1,Rps18,Cers2,Egfr,Gnb2l1,Drg1,Cpd,Aloxe3,Sptlc2,Arg2,Hexb,Dhfr,Pdhb,Cln5,Eif3e,Naga,Sod1,Cers5,Denr,Mrps18a,Glo1,Eif2ak2,Etf1,Ighmbp2,Hexa,Acot9,Itgb8,St8sia2,Mrpl44,Cln8,Fh1,Fpgs,Mrrf,Mrps5,Acss2,Eif6,Slc7a11,Gclm,Eif4e,Ugcg,Gba2,Mmachc,Gnpda2,Rpl6,Abtb1,Mrps11,Rps3,Dgat2,Atp6ap2,Acsl4,Rps4x…	2.67e-05	0.00095	Cellular amide metabolic process	22.6415
TISSUES	BTO:0001279	60	203	10090	10090.ENSMUSP00000000122,10090.ENSMUSP00000000193,10090.ENSMUSP00000001780,10090.ENSMUSP00000002572,10090.ENSMUSP00000004173,10090.ENSMUSP00000004990,10090.ENSMUSP00000006235,10090.ENSMUSP00000007130,10090.ENSMUSP00000007959,10090.ENSMUSP00000017576,10090.ENSMUSP00000021674,10090.ENSMUSP00000022616,10090.ENSMUSP00000022639,10090.ENSMUSP00000023259,10090.ENSMUSP00000023707,10090.ENSMUSP00000024823…	Ngfr,Ccl2,Akt1,Slc9a3r2,Cdip1,Mapk14,Ctsb,Ctnnb1,Rhoa,Rbfox3,Fos,Clu,Nefl,Lynx1,Sod1,Glo1,Gfra1,Casp1,Vim,Uchl1,Mtpn,Nucb1,Fam115a,Tspo,C1qb,Larp6,Dner,Grin3b,C1qa,Mapk3,Lamp2,Sugt1,Cdc42,Cd14,Slc35f6,Crh,Gfap,Dnaja4,Cdc42se2,Chat,Tubb3,Drd2,Map2,Hmgb1,Glul,Map9,Nefh,Slc5a7,Tuba1a,Scn9a,Actb,Jagn1,Rtn4,Jun,Nf2,Calm1,Stat3,Mchr1,Arsa,Omg	2.73e-05	0.0017	Spinal cord	29.5567
Keyword	KW-0418	145	631	10090	10090.ENSMUSP00000000542,10090.ENSMUSP00000000642,10090.ENSMUSP00000001115,10090.ENSMUSP00000001780,10090.ENSMUSP00000002087,10090.ENSMUSP00000002487,10090.ENSMUSP00000003313,10090.ENSMUSP00000003850,10090.ENSMUSP00000004281,10090.ENSMUSP00000004920,10090.ENSMUSP00000004990,10090.ENSMUSP00000005066,10090.ENSMUSP00000006912,10090.ENSMUSP00000007757,10090.ENSMUSP00000013970,10090.ENSMUSP00000015137…	Acvrl1,Hk2,Grk6,Akt1,Pnck,Braf,Grk5,Itpkc,Dyrk2,Ulk2,Mapk14,Map2k1,Pip4k2a,Tgfbr1,Pip4k2c,Limk1,Camk1g,Mapkapk2,Pip4k2b,Pank3,Nuak1,Egfr,Pfkl,Map2k6,Cmpk2,Nme2,Plk2,Lats2,Pak2,Rps6ka2,Pkmyt1,Pim1,Eif2ak2,Riok3,Rfk,Rps6kb2,Map4k2,Fn3k,Stk17b,Uck2,Uhmk1,Mastl,Acvr1c,Hipk1,Prkaa2,Cmpk1,Pink1,Map3k6,Cdk5,Ret,Camk1,Pak1,Ilk,Wee1,Pim2,Dstyk,Pdk3,Gak,Camk1d,Bmp2k,Fn3krp,Pdxk,Flt3,Brsk1,Mapk6,Map2k4,Pdk2…	2.75e-05	0.00047	Kinase	22.9794
Process	GO:0001505	71	255	10090	10090.ENSMUSP00000000199,10090.ENSMUSP00000000572,10090.ENSMUSP00000002487,10090.ENSMUSP00000003971,10090.ENSMUSP00000005509,10090.ENSMUSP00000006181,10090.ENSMUSP00000007236,10090.ENSMUSP00000009538,10090.ENSMUSP00000018644,10090.ENSMUSP00000019577,10090.ENSMUSP00000020706,10090.ENSMUSP00000021195,10090.ENSMUSP00000022040,10090.ENSMUSP00000023132,10090.ENSMUSP00000023758,10090.ENSMUSP00000023776…	Ncs1,Gabra2,Braf,Lin7b,Stx1a,Napa,Syngr3,Syn2,Adora2b,Gipc1,Adcy1,Slc6a4,Agtpbp1,Pde1b,Asic1,Slc4a8,Ache,Syt4,Apba1,Cln8,Aldh9a1,Snap25,Napb,Ppt1,Cdk5,Slc17a6,Pak1,Stx4a,Cplx1,Brsk1,Aldh5a1,Arl6ip5,Syde1,Rims4,Dagla,Htr2a,Adra1a,Syt12,Nat8l,Slc29a4,Ptprn2,Gfap,Rap1b,Per2,Prkcb,Chat,Nf1,Otof,Prima1,Drd2,Rph3a,Mctp2,Itgb1,Erc2,Stxbp1,Slc5a7,Prkce,Snap91,Prkcg,Kcnc3,Calm1,Colq,Syt2,Grm4,Syn3,Mctp1,S…	2.78e-05	0.00098	Regulation of neurotransmitter levels	27.8431
Process	GO:0019752	168	754	10090	10090.ENSMUSP00000000287,10090.ENSMUSP00000000642,10090.ENSMUSP00000001416,10090.ENSMUSP00000001780,10090.ENSMUSP00000001824,10090.ENSMUSP00000002320,10090.ENSMUSP00000003572,10090.ENSMUSP00000003655,10090.ENSMUSP00000003720,10090.ENSMUSP00000003906,10090.ENSMUSP00000004137,10090.ENSMUSP00000004968,10090.ENSMUSP00000004990,10090.ENSMUSP00000005218,10090.ENSMUSP00000005651,10090.ENSMUSP00000005826…	Scpep1,Hk2,Hars,Akt1,Folh1,Ppard,Gars,As3mt,Crot,Farsa,Gstm7,Plod3,Mapk14,Cd44,Por,Cs,Elovl1,Itih3,Tph2,Acat2,Ddah2,Fads1,Pgam1,Qdpr,Echdc1,Pex7,Pah,Pfkl,Gfpt2,Blmh,Aloxe3,Hif1a,Arg2,Habp4,Sdha,Mccc2,Dhfr,Pdhb,Glud1,Slc25a17,Aco2,Pim1,Glo1,Cyp1b1,Eci1,Me2,Fads2,Cpt1a,Cyp26a1,Scd3,Scd2,Rdh10,Acadl,Cyp27a1,Fh1,Mgst3,Fpgs,Crat,Hsd17b12,Hao1,Ivd,Slc23a2,Acss2,Gclm,Ddah1,Decr1,Nr4a3,Prkaa2,Cyp2j6,Pdpn…	2.79e-05	0.00098	Carboxylic acid metabolic process	22.2812
Component	GO:0031984	92	358	10090	10090.ENSMUSP00000000895,10090.ENSMUSP00000001479,10090.ENSMUSP00000002029,10090.ENSMUSP00000002063,10090.ENSMUSP00000003117,10090.ENSMUSP00000004968,10090.ENSMUSP00000006027,10090.ENSMUSP00000009219,10090.ENSMUSP00000009234,10090.ENSMUSP00000020350,10090.ENSMUSP00000020420,10090.ENSMUSP00000020537,10090.ENSMUSP00000021001,10090.ENSMUSP00000021201,10090.ENSMUSP00000021285,10090.ENSMUSP00000021380…	Necab3,Kpnb1,Emd,Ap4e1,Ap1m1,Plod3,Reep5,Cabp7,Ap1b1,Lgr5,Ap3d1,Nsg2,Rab10,Cpd,Stx8,Trappc6b,Scamp1,Cby1,Osbp,Rab29,Stx6,Snap25,B4galt1,Adc,Nsg1,Ccdc91,Rtn2,Rab30,Xylt1,Rab6a,Stx4a,Nucb1,St3gal2,Chst5,Galnt2,St3gal4,Bsn,Clvs1,Scamp5,Reep2,Fam91a1,BC022687,Hace1,Chst2,Nmnat2,March9,Psenen,Bet1,Akap9,Cnst,Coro7,Golim4,Lamp2,Gcc2,Fut8,Pam,Golph3,Sorl1,Tmed3,Vps53,Gal3st3,Adam10,Rab7b,B4galt6,Pld4,Ra…	2.84e-05	0.00041	Organelle subcompartment	25.6983
TISSUES	BTO:0000141	56	185	10090	10090.ENSMUSP00000000767,10090.ENSMUSP00000001824,10090.ENSMUSP00000004173,10090.ENSMUSP00000005218,10090.ENSMUSP00000007130,10090.ENSMUSP00000014022,10090.ENSMUSP00000014743,10090.ENSMUSP00000017799,10090.ENSMUSP00000017851,10090.ENSMUSP00000018470,10090.ENSMUSP00000019723,10090.ENSMUSP00000020911,10090.ENSMUSP00000021083,10090.ENSMUSP00000021471,10090.ENSMUSP00000021668,10090.ENSMUSP00000022529…	Rpa1,Folh1,Cdip1,Cd44,Ctnnb1,Rnf170,Csf1,Cd40,Serinc3,Ywhab,D17Wsu104e,Sdc1,Hn1,Tmx1,Npc2,Tkt,Cct5,Bcl6,Tfrc,Stom,Hsd17b12,Bcl10,Sdcbp,Cd38,Fam69a,Mtpn,Morf4l2,Tnfsf13b,Msmo1,Myd88,Ypel3,Eif3l,Flt3,Prkx,Gpi1,Slc35f6,Dlst,Khdrbs1,Pld4,Tuba1b,Arpc5,Gpx1,Naca,Actb,Jagn1,Prdm1,Gaa,Fam214b,Thpo,Golga7,Hdhd2,Pfkp,Ndufv2,Snapin,Cct4,Lmbrd1	2.88e-05	0.0018	Bone marrow	30.2703
Process	GO:0006644	80	299	10090	10090.ENSMUSP00000002320,10090.ENSMUSP00000002549,10090.ENSMUSP00000004381,10090.ENSMUSP00000006692,10090.ENSMUSP00000006912,10090.ENSMUSP00000013970,10090.ENSMUSP00000017851,10090.ENSMUSP00000018691,10090.ENSMUSP00000020997,10090.ENSMUSP00000021424,10090.ENSMUSP00000021450,10090.ENSMUSP00000021990,10090.ENSMUSP00000022169,10090.ENSMUSP00000023830,10090.ENSMUSP00000024594,10090.ENSMUSP00000024706…	Ppard,Abhd3,Lpcat3,Mvd,Pip4k2a,Pip4k2c,Serinc3,Pip4k2b,Sh3yl1,Sptlc2,Sgpp1,Ptdss1,Hexb,Nus1,Agpat4,Pla2g7,Pigf,Pnliprp2,Pcyt2,Cln8,Bpnt1,Agpat2,Lpcat4,Crls1,Fabp5,Lrat,Fam126a,Cds1,Pla2g15,Socs5,Fig4,Smpd1,Mtmr7,Pcyt1b,Inpp5f,Gde1,Acsl5,Inpp5j,Serinc5,Pip5kl1,D3Bwg0562e,Abhd12,Pik3r1,Pigz,Socs3,Mtmr9,Pik3cg,Impa1,Lclat1,Pi4k2a,Pigh,Mppe1,Dgkh,Impad1,Cish,Hrasls,Pla2g4e,BC005764,Ppapdc1a,Pgap1,Pig…	2.91e-05	0.001	Phospholipid metabolic process	26.7559
KEGG	mmu05132	62	213	10090	10090.ENSMUSP00000001780,10090.ENSMUSP00000002790,10090.ENSMUSP00000004990,10090.ENSMUSP00000005066,10090.ENSMUSP00000006467,10090.ENSMUSP00000007130,10090.ENSMUSP00000007959,10090.ENSMUSP00000009003,10090.ENSMUSP00000009157,10090.ENSMUSP00000016143,10090.ENSMUSP00000018437,10090.ENSMUSP00000020775,10090.ENSMUSP00000020949,10090.ENSMUSP00000020967,10090.ENSMUSP00000021674,10090.ENSMUSP00000022496…	Akt1,Cse1l,Mapk14,Map2k1,Arpc2,Ctnnb1,Rhoa,Rala,Dynll1,Wasf3,Pfn1,Dynll2,Map2k6,Pfn4,Fos,Kpna3,Rela,Podxl,Casp1,Lef1,Txn1,Vps33a,Wasl,Tnfrsf1a,Rps3,Pak1,Dynlt3,Anxa2,Fbxo22,Myd88,S100a10,Tab3,Map2k4,Rras,Plekhm1,Mapk3,Gcc2,Cdc42,Arf6,Cd14,Rhoj,Pik3cg,Rab7b,Actg1,Vps41,Arpc5,Rac1,Arpc1b,Myl9,Mapk11,Ahnak,Casp3,Actb,Jun,Snx18,Akt3,Bcl2,Mapk10,Arpc5l,Cyth3,Klc2,Exoc5	2.96e-05	0.00098	Salmonella infection	29.108
Component	GO:0044306	62	213	10090	10090.ENSMUSP00000000193,10090.ENSMUSP00000000199,10090.ENSMUSP00000003754,10090.ENSMUSP00000006467,10090.ENSMUSP00000009550,10090.ENSMUSP00000020040,10090.ENSMUSP00000020420,10090.ENSMUSP00000022629,10090.ENSMUSP00000023776,10090.ENSMUSP00000025110,10090.ENSMUSP00000025875,10090.ENSMUSP00000027020,10090.ENSMUSP00000029266,10090.ENSMUSP00000029603,10090.ENSMUSP00000029876,10090.ENSMUSP00000030628…	Ccl2,Ncs1,Calb2,Arpc2,Elk1,Nts,Ap3d1,Dpysl2,Slc4a8,Syt4,Slc1a1,Gria4,Anxa5,Prss12,Calb1,Tmem57,Grik3,Uchl1,Npy,Ilk,Ptpn9,Bsn,Tanc1,Atcay,Cplx1,Hnrnpk,Kcna2,Sncb,Pacsin1,Bzrap1,Oprd1,Flrt3,Itga2,Kcna1,Adra2c,Grin2b,Pgr,Ptprn2,Adcyap1,Prkcb,Actg1,Drd2,Gria3,Glul,Erc2,Gad1,Vti1a,Snap91,Prkcg,Actb,Hap1,L1cam,Kcnc3,Flrt1,Grik4,Grin2a,Grm4,Prrt2,Tbc1d24,Chrm2,Htr1b,Chrm3	2.96e-05	0.00043	Neuron projection terminus	29.108
Process	GO:0032956	89	344	10090	10090.ENSMUSP00000000590,10090.ENSMUSP00000000939,10090.ENSMUSP00000002303,10090.ENSMUSP00000002487,10090.ENSMUSP00000005234,10090.ENSMUSP00000006467,10090.ENSMUSP00000006618,10090.ENSMUSP00000007757,10090.ENSMUSP00000007959,10090.ENSMUSP00000008893,10090.ENSMUSP00000010298,10090.ENSMUSP00000015137,10090.ENSMUSP00000016143,10090.ENSMUSP00000018437,10090.ENSMUSP00000019911,10090.ENSMUSP00000020171…	Rdx,Hip1r,Rhoc,Braf,Wdr1,Arpc2,Arhgef19,Tgfbr1,Rhoa,Coro1b,Spire2,Limk1,Wasf3,Pfn1,Hdac2,Ctgf,Pfn4,Grb2,F2rl1,Rgcc,Twf1,Pak2,Arhgap28,Rhoq,Smad4,Ppm1f,Gsn,Gba2,Stmn1,Fscn1,Wasl,Mtpn,Add2,Fchsd2,Pak1,Ilk,Cx3cl1,S100a10,Plekhh2,Fhod3,Rhov,Asap3,Lrp1,Sh3pxd2b,Wipf2,Sh3bp1,Eps8,Cdc42,Arf6,Pik3r1,Pam,Rhoj,Cdc42ep2,Ppm1e,Arhgdia,Epha3,Ep300,Sema5a,Jmy,Actg1,Tmod3,Sema3e,Arhgap35,Efna5,Arpc5,Notch2,Mtss…	3.09e-05	0.0011	Regulation of actin cytoskeleton organization	25.8721
Process	GO:1901137	116	481	10090	10090.ENSMUSP00000004327,10090.ENSMUSP00000004968,10090.ENSMUSP00000006557,10090.ENSMUSP00000006764,10090.ENSMUSP00000018990,10090.ENSMUSP00000020629,10090.ENSMUSP00000020706,10090.ENSMUSP00000020969,10090.ENSMUSP00000021217,10090.ENSMUSP00000022013,10090.ENSMUSP00000022268,10090.ENSMUSP00000022529,10090.ENSMUSP00000022921,10090.ENSMUSP00000023007,10090.ENSMUSP00000023112,10090.ENSMUSP00000023677…	G6pdx,Plod3,Elovl1,Aprt,Pank3,Gfpt2,Adcy1,Cmpk2,Nme2,Adcy2,Pdhb,Tkt,Angpt1,Adcy8,Pmm1,Atp5o,Nus1,Pigf,Rfk,Hexa,Hprt,St8sia2,Uck2,Ext2,Acss2,Serp1,Extl2,Gucy1b3,Ugcg,B4galt1,Stoml2,Npr2,Ctps,Cmpk1,Ugdh,Gnpda2,St8sia1,Acan,Xylt1,Acsl4,Acsl1,St3gal2,Chst5,Galnt2,St3gal4,Acat1,Alg9,Mpi,Nt5e,St6galnac5,Uggt1,Sccpdh,Hs2st1,Mgat3,Pank1,Alg2,Chst11,Galnt12,Tmtc4,Ostc,Acsl5,Gxylt1,Adk,Xxylt1,Fut8,Tmtc1,Go…	3.1e-05	0.0011	Carbohydrate derivative biosynthetic process	24.1164
Process	GO:0006082	180	821	10090	10090.ENSMUSP00000000287,10090.ENSMUSP00000000642,10090.ENSMUSP00000001416,10090.ENSMUSP00000001780,10090.ENSMUSP00000001824,10090.ENSMUSP00000002320,10090.ENSMUSP00000003572,10090.ENSMUSP00000003655,10090.ENSMUSP00000003720,10090.ENSMUSP00000003906,10090.ENSMUSP00000004137,10090.ENSMUSP00000004968,10090.ENSMUSP00000004990,10090.ENSMUSP00000005218,10090.ENSMUSP00000005651,10090.ENSMUSP00000005826…	Scpep1,Hk2,Hars,Akt1,Folh1,Ppard,Gars,As3mt,Crot,Farsa,Gstm7,Plod3,Mapk14,Cd44,Por,Cs,Elovl1,Itih3,Tph2,Acat2,Ddah2,Fads1,Pgam1,Qdpr,Echdc1,Pex7,Pah,Pfkl,Gfpt2,Blmh,Aloxe3,Hif1a,Arg2,Habp4,Sdha,Mccc2,Dhfr,Pdhb,Glud1,Angpt1,Slc25a17,Aco2,Pim1,Glo1,Cyp1b1,Eci1,Me2,Fads2,Cpt1a,Cyp26a1,Scd3,Scd2,Rdh10,Acadl,Cyp27a1,Fh1,Mgst3,Fpgs,Crat,Hsd17b12,Ext2,Hao1,Ivd,Slc23a2,Acss2,Gclm,Uox,Ddah1,Decr1,Nr4a3,Pr…	3.16e-05	0.0011	Organic acid metabolic process	21.9245
RCTM	MMU-5673001	73	266	10090	10090.ENSMUSP00000000186,10090.ENSMUSP00000002487,10090.ENSMUSP00000002848,10090.ENSMUSP00000005066,10090.ENSMUSP00000013842,10090.ENSMUSP00000014913,10090.ENSMUSP00000016138,10090.ENSMUSP00000017572,10090.ENSMUSP00000018470,10090.ENSMUSP00000020118,10090.ENSMUSP00000020329,10090.ENSMUSP00000021090,10090.ENSMUSP00000021898,10090.ENSMUSP00000022369,10090.ENSMUSP00000022380,10090.ENSMUSP00000022545…	Fgf23,Braf,Grin2d,Map2k1,Pea15a,Psmb1,Fnta,Psmd11,Ywhab,Dusp6,Egfr,Grb2,Shc3,Vcl,Psmc6,Fgf9,Nefl,Gfra2,Angpt1,Ppp2r5b,Gfra1,Rgl1,Spred1,Psma7,Nras,Lamtor2,Tln1,Brap,Tgfa,Ret,Dusp4,Rasgrf1,Mras,Irs2,Flt3,Zdhhc9,Psme4,Fgf1,Dusp10,Nrtn,Dusp5,Mapk3,Erbb2,Abhd17b,Pik3r1,Kbtbd7,Grin2b,Rap1b,Sos1,Nf1,Actg1,Ptpra,Syngap1,Mark3,Spred2,Shc1,Csf2rb2,Rasgrf2,Ralgds,Actb,Tek,Fgf3,Camk2b,Met,Golga7,Abhd17c,Ras…	3.21e-05	0.0026	RAF/MAP kinase cascade	27.4436
Function	GO:0051020	119	497	10090	10090.ENSMUSP00000000122,10090.ENSMUSP00000000543,10090.ENSMUSP00000001479,10090.ENSMUSP00000002487,10090.ENSMUSP00000002790,10090.ENSMUSP00000003320,10090.ENSMUSP00000004646,10090.ENSMUSP00000005066,10090.ENSMUSP00000005256,10090.ENSMUSP00000006618,10090.ENSMUSP00000014694,10090.ENSMUSP00000017783,10090.ENSMUSP00000018437,10090.ENSMUSP00000019231,10090.ENSMUSP00000020339,10090.ENSMUSP00000022369…	Ngfr,Grasp,Kpnb1,Braf,Cse1l,Eif2b5,Coro1c,Map2k1,Ndrg1,Arhgef19,Zfyve20,Rab11fip4,Pfn1,Atp6ap1,Tbc1d15,Vcl,Pak2,Sod1,March5,Arhgdig,Ehd1,Ric8,Chm,Farp1,Rassf5,Rab29,Rgl1,Kif3b,Lamtor2,Abca1,Stoml2,Ipo5,Stx4a,Nucb1,Dock11,Anxa2,Rasgrf1,Vav3,Fbxo8,Rabif,Rragb,Hace1,Bicd2,Micall2,Micall1,Rundc1,Cdc42bpb,Usp6nl,Sgsm3,Dennd2a,Rims4,Fmnl1,Myrip,Dock3,Dock9,Tbc1d8,Rilpl1,Rnf152,Mtss1l,Kndc1,Sh3bp1,Pard6…	3.21e-05	0.002	GTPase binding	23.9437
Keyword	KW-0130	104	420	10090	10090.ENSMUSP00000000109,10090.ENSMUSP00000000299,10090.ENSMUSP00000001548,10090.ENSMUSP00000001592,10090.ENSMUSP00000002412,10090.ENSMUSP00000003061,10090.ENSMUSP00000005218,10090.ENSMUSP00000005255,10090.ENSMUSP00000005532,10090.ENSMUSP00000006828,10090.ENSMUSP00000007130,10090.ENSMUSP00000015791,10090.ENSMUSP00000016315,10090.ENSMUSP00000016771,10090.ENSMUSP00000019962,10090.ENSMUSP00000020171…	Cntn1,Itgb2,Itga3,Jup,Ncan,Bcam,Cd44,Wisp1,Nid1,Aplp1,Ctnnb1,Lama5,Lamb3,Myh9,Cd164,Ctgf,Nuak1,Cdhr1,Vcl,Alcam,Pvrl3,Cxadr,Sympk,Itgb8,Podxl,Itga6,Thbs3,Cyr61,Cgref1,Ret,Olr1,Cd9,Cx3cl1,Cdh5,Pvrl1,Mcam,Cntnap5a,Lpp,Clstn1,Cdh6,Frem3,Jcad,Sdk2,Ptprf,Podxl2,Spon1,Lama1,Thbs1,Pcdh8,Cdh20,Flrt3,Itga2,Pcdh20,Pcdh1,Dscam,Pcdhga3,Fat4,Flrt2,Neo1,Chl1,Ptprs,Cdh24,Nlgn3,Cdh22,Ackr3,Pcdh17,Col12a1,Flot2,Ne…	3.22e-05	0.00053	Cell adhesion	24.7619
Function	GO:0031072	46	141	10090	10090.ENSMUSP00000000299,10090.ENSMUSP00000001479,10090.ENSMUSP00000001825,10090.ENSMUSP00000006692,10090.ENSMUSP00000015137,10090.ENSMUSP00000018466,10090.ENSMUSP00000019911,10090.ENSMUSP00000021530,10090.ENSMUSP00000021940,10090.ENSMUSP00000023486,10090.ENSMUSP00000025208,10090.ENSMUSP00000025250,10090.ENSMUSP00000025918,10090.ENSMUSP00000027356,10090.ENSMUSP00000028392,10090.ENSMUSP00000029382…	Itgb2,Kpnb1,Chordc1,Mvd,Limk1,Tomm34,Hdac2,Hif1a,Lman2,Tfrc,Dnajc18,Bag6,Stip1,Cyp27a1,Dnajc10,Ppid,Gucy1b3,Cdk5,Fkbp4,Rps3,Hnrnpk,Bag2,Pacrg,Fgf1,Ptges3,Sh3bp1,Erbb2,Dlst,Cdc37l1,Arhgdia,Dmp1,Dnaja4,Ficd,Fkbp5,Htt,Hspa2,Eno1,Dnajb14,Tfam,Dnajc8,Faf1,Tsc1,Slc12a2,Ahr,Kcnj11,Dnajb2	3.27e-05	0.002	Heat shock protein binding	32.6241
Process	GO:0019725	185	849	10090	10090.ENSMUSP00000000058,10090.ENSMUSP00000000122,10090.ENSMUSP00000000186,10090.ENSMUSP00000000193,10090.ENSMUSP00000000199,10090.ENSMUSP00000000642,10090.ENSMUSP00000001652,10090.ENSMUSP00000002848,10090.ENSMUSP00000003442,10090.ENSMUSP00000003754,10090.ENSMUSP00000004137,10090.ENSMUSP00000014920,10090.ENSMUSP00000015481,10090.ENSMUSP00000015486,10090.ENSMUSP00000017590,10090.ENSMUSP00000017799…	Cav2,Ngfr,Fgf23,Ccl2,Ncs1,Hk2,Bdkrb2,Grin2d,Cacnb3,Calb2,Gstm7,Nol3,Endog,Xk,C1qtnf1,Cd40,Slc12a7,Trpv2,Atp6ap1,Atp2b1,Mcu,Avpr1a,Gnb2l1,Gna13,Slc9a3r1,Nme2,Tmx1,Hif1a,Chga,Ryr2,Hexb,F2rl1,Ero1l,Micu2,Cln5,Adcy8,Vdr,Tfrc,Pdia5,Sod1,Slc4a8,Smad4,Prdx3,P4hb,Prdx4,Iscu,Dnajc10,Ccdc109b,Gclm,Calb1,Txn1,Stoml2,Prkaa2,Txndc12,Ppt1,Slc9a1,Cdk5,Cd38,Tesc,Vps33a,Aacs,Pde6b,Lrp6,Dgat2,Cckbr,Atp6ap2,Slc9a9,…	3.31e-05	0.0012	Cellular homeostasis	21.7903
COMPARTMENTS	GOCC:0031256	43	128	10090	10090.ENSMUSP00000000122,10090.ENSMUSP00000000572,10090.ENSMUSP00000000939,10090.ENSMUSP00000005218,10090.ENSMUSP00000006467,10090.ENSMUSP00000007959,10090.ENSMUSP00000018993,10090.ENSMUSP00000020107,10090.ENSMUSP00000020997,10090.ENSMUSP00000023600,10090.ENSMUSP00000025338,10090.ENSMUSP00000026994,10090.ENSMUSP00000030317,10090.ENSMUSP00000032264,10090.ENSMUSP00000032998,10090.ENSMUSP00000037955…	Ngfr,Gabra2,Hip1r,Cd44,Arpc2,Rhoa,Wwc1,Atp2b1,Sh3yl1,Robo1,Gabbr1,Unc5a,Pdpn,Gabarapl1,Rps3,Vezt,Jcad,Kcna2,Eef1a1,Pacsin1,Dagla,Oprd1,Mtss1l,Eps8,Cdc42,Kcnb1,Gabrg2,Slc39a6,Map2,Rac1,Insr,Psd3,Slc12a5,Hcn2,Kcnc3,Atf4,Cntnap2,Thy1,Ank1,Nme1,Macf1,Kcnj11,Cacng8	3.32e-05	0.00083	Leading edge membrane	33.5938
Component	GO:0034705	32	82	10090	10090.ENSMUSP00000005509,10090.ENSMUSP00000009875,10090.ENSMUSP00000018614,10090.ENSMUSP00000025908,10090.ENSMUSP00000027020,10090.ENSMUSP00000028727,10090.ENSMUSP00000030676,10090.ENSMUSP00000037192,10090.ENSMUSP00000041702,10090.ENSMUSP00000046103,10090.ENSMUSP00000047705,10090.ENSMUSP00000055225,10090.ENSMUSP00000056552,10090.ENSMUSP00000057981,10090.ENSMUSP00000060706,10090.ENSMUSP00000063329…	Stx1a,Kcnd1,Kcnab3,Kcnk4,Gria4,Snap25,Grik3,Kcnj2,Kcna2,Kcnk1,Kcnh2,Kcna1,Kcng4,Kcnb1,Kcns3,Kcnj3,Kcnq3,Kcnmb4,Kcnd2,Sumo1,Hcn2,Cttn,Kcnc3,Kcng1,Calm1,Cntnap2,Grik4,Dpp6,Kcnip2,Kcnb2,Kcnip4,Kcnj11	3.33e-05	0.00047	Potassium channel complex	39.0244
Process	GO:0006468	173	785	10090	10090.ENSMUSP00000000186,10090.ENSMUSP00000000542,10090.ENSMUSP00000000579,10090.ENSMUSP00000001115,10090.ENSMUSP00000001780,10090.ENSMUSP00000002087,10090.ENSMUSP00000002487,10090.ENSMUSP00000002808,10090.ENSMUSP00000003313,10090.ENSMUSP00000004281,10090.ENSMUSP00000004920,10090.ENSMUSP00000004990,10090.ENSMUSP00000005066,10090.ENSMUSP00000007757,10090.ENSMUSP00000015137,10090.ENSMUSP00000016323…	Fgf23,Acvrl1,Sox9,Grk6,Akt1,Pnck,Braf,Prkra,Grk5,Dyrk2,Ulk2,Mapk14,Map2k1,Tgfbr1,Limk1,Camk1g,Mapkapk2,Nrbp2,Nuak1,Egfr,Igfbp3,Trib2,Map2k6,Nme2,Plk2,Lats2,Ywhaz,Twf1,Pak2,Rps6ka2,Pkmyt1,Pim1,Eif2ak2,Riok3,Smad4,Rps6kb2,Map4k2,Smad7,Stk17b,Uhmk1,Mastl,Acvr1c,Ptpn1,Smad9,Hipk1,Cpne3,Ikbkap,Npr2,Prkaa2,Pink1,Map3k6,Prkag2,Cdk5,Brap,Ret,Camk1,Pak1,Ilk,Cckbr,Wee1,Fgf13,Pim2,Tnks,Ctsh,Myd88,Dstyk,Prka…	3.54e-05	0.0012	Protein phosphorylation	22.0382
KEGG	mmu04024	61	210	10090	10090.ENSMUSP00000000001,10090.ENSMUSP00000000579,10090.ENSMUSP00000001780,10090.ENSMUSP00000002487,10090.ENSMUSP00000002848,10090.ENSMUSP00000005066,10090.ENSMUSP00000007959,10090.ENSMUSP00000011315,10090.ENSMUSP00000019906,10090.ENSMUSP00000020107,10090.ENSMUSP00000020706,10090.ENSMUSP00000021674,10090.ENSMUSP00000021750,10090.ENSMUSP00000022013,10090.ENSMUSP00000023007,10090.ENSMUSP00000025338…	Gnai3,Sox9,Akt1,Braf,Grin2d,Map2k1,Rhoa,Vipr2,Vip,Atp2b1,Adcy1,Fos,Ryr2,Adcy2,Adcy8,Gabbr1,Rela,Gria4,Slc9a1,Npy,Pak1,Atp1b3,Vav3,Pde4a,Ppp1ca,Atp1a1,Rras,Amh,Npy1r,Camk4,Grin3b,Mapk3,Pik3r1,Gnai2,F2r,Grin2b,Vav2,Acox1,Rap1b,Ep300,Adcyap1,Ppp1r12a,Rras2,Gnai1,Drd2,Gria3,Rac1,Atp2b3,Myl9,Hcn2,Jun,Gabbr2,Ppara,Camk2b,Sstr1,Akt3,Mapk10,Grin2a,Mllt4,Chrm2,Htr1b	3.59e-05	0.0011	cAMP signaling pathway	29.0476
RCTM	MMU-5684996	74	272	10090	10090.ENSMUSP00000000186,10090.ENSMUSP00000002487,10090.ENSMUSP00000002848,10090.ENSMUSP00000005066,10090.ENSMUSP00000013842,10090.ENSMUSP00000014913,10090.ENSMUSP00000016138,10090.ENSMUSP00000017572,10090.ENSMUSP00000018470,10090.ENSMUSP00000020118,10090.ENSMUSP00000020329,10090.ENSMUSP00000021090,10090.ENSMUSP00000021898,10090.ENSMUSP00000022369,10090.ENSMUSP00000022380,10090.ENSMUSP00000022545…	Fgf23,Braf,Grin2d,Map2k1,Pea15a,Psmb1,Fnta,Psmd11,Ywhab,Dusp6,Egfr,Grb2,Shc3,Vcl,Psmc6,Fgf9,Nefl,Gfra2,Angpt1,Ppp2r5b,Gfra1,Rgl1,Spred1,Psma7,Nras,Lamtor2,Tln1,Brap,Tgfa,Ret,Dusp4,Rasgrf1,Mras,Irs2,Flt3,Zdhhc9,Psme4,Fgf1,Dusp10,Nrtn,Dusp5,Mapk3,Erbb2,Abhd17b,Pik3r1,Kbtbd7,Grin2b,Rap1b,Sos1,Nf1,Actg1,Ptpra,Syngap1,Mark3,Spred2,Shc1,Csf2rb2,Rasgrf2,Ralgds,Actb,Tek,Fgf3,Camk2b,Met,Golga7,Abhd17c,Ras…	3.61e-05	0.0028	MAPK1/MAPK3 signaling	27.2059
KEGG	mmu04910	44	133	10090	10090.ENSMUSP00000000642,10090.ENSMUSP00000001780,10090.ENSMUSP00000002487,10090.ENSMUSP00000003964,10090.ENSMUSP00000005066,10090.ENSMUSP00000009550,10090.ENSMUSP00000020846,10090.ENSMUSP00000021090,10090.ENSMUSP00000021898,10090.ENSMUSP00000024956,10090.ENSMUSP00000025749,10090.ENSMUSP00000026550,10090.ENSMUSP00000029053,10090.ENSMUSP00000029445,10090.ENSMUSP00000029803,10090.ENSMUSP00000030243…	Hk2,Akt1,Braf,Gys1,Map2k1,Elk1,Srebf1,Grb2,Shc3,Rhoq,Rps6kb2,Inpp5a,Ptpn1,Nras,Eif4e,Prkaa2,Prkag2,Rheb,Prkab2,Irs2,Pck2,Ppp1ca,Ptprf,Prkar2b,Cbl,Phkb,Mapk3,Pik3r1,Socs3,Ppp1r3d,Sos1,Pygl,Flot2,G6pc3,Ppp1r3c,Insr,Shc1,Acacb,Rps6,Akt3,Mapk10,Tsc1,Ppargc1a,Shc2	3.65e-05	0.0011	Insulin signaling pathway	33.0827
Process	GO:1901699	141	615	10090	10090.ENSMUSP00000000001,10090.ENSMUSP00000000058,10090.ENSMUSP00000000122,10090.ENSMUSP00000000193,10090.ENSMUSP00000000579,10090.ENSMUSP00000001592,10090.ENSMUSP00000001780,10090.ENSMUSP00000003550,10090.ENSMUSP00000004137,10090.ENSMUSP00000004202,10090.ENSMUSP00000005279,10090.ENSMUSP00000005651,10090.ENSMUSP00000005798,10090.ENSMUSP00000006467,10090.ENSMUSP00000006764,10090.ENSMUSP00000006828…	Gnai3,Cav2,Ngfr,Ccl2,Sox9,Jup,Akt1,Ncstn,Gstm7,Dnmt1,Klf5,Por,Snx6,Arpc2,Aprt,Aplp1,Ctnnb1,Gatsl2,Top2b,Ndel1,Hdac2,Eif4ebp2,Egfr,Nsg2,Srebf1,Nampt,Rab10,Slc9a3r1,Grb2,Slc6a4,Ryr2,Bcl2l2,Adcy8,Atp5o,Sod1,Rhoq,Riok3,Impact,Gnal,Gna14,Rela,Parp1,Vim,Grb14,Ptpn1,Anxa5,Casp6,Gucy1b3,Lamtor2,Gclm,Nr4a3,Slc9a1,Cdk5,Nsg1,Ipo5,Pak1,Col4a1,Sfrp1,Star,Tmem38a,Zdhhc7,Phip,Gclc,Irs2,Cib2,Pck2,Htr5a,Rragb,Hnr…	3.87e-05	0.0013	Cellular response to nitrogen compound	22.9268
Process	GO:0050771	28	67	10090	10090.ENSMUSP00000000127,10090.ENSMUSP00000000641,10090.ENSMUSP00000004326,10090.ENSMUSP00000004920,10090.ENSMUSP00000025993,10090.ENSMUSP00000030568,10090.ENSMUSP00000030714,10090.ENSMUSP00000030814,10090.ENSMUSP00000030862,10090.ENSMUSP00000030868,10090.ENSMUSP00000031229,10090.ENSMUSP00000033473,10090.ENSMUSP00000042211,10090.ENSMUSP00000064048,10090.ENSMUSP00000069024,10090.ENSMUSP00000073612…	Wnt3,Sema4f,Plxna3,Ulk2,Slit1,Sema3c,Sema3a,Cdk5,Draxin,Sema3d,Rufy3,Fgf13,Sema7a,Ptprs,Sema5a,Sema3e,Map2,Syngap1,Rgma,Rtn4,Ephb2,Dab1,Tnr,Thy1,Rnf6,Slit2,Sema6b,Actr3	3.88e-05	0.0013	Negative regulation of axonogenesis	41.791
Function	GO:0016818	164	738	10090	10090.ENSMUSP00000000001,10090.ENSMUSP00000001347,10090.ENSMUSP00000001513,10090.ENSMUSP00000001566,10090.ENSMUSP00000002303,10090.ENSMUSP00000002840,10090.ENSMUSP00000003451,10090.ENSMUSP00000003572,10090.ENSMUSP00000003717,10090.ENSMUSP00000005503,10090.ENSMUSP00000007959,10090.ENSMUSP00000009003,10090.ENSMUSP00000009157,10090.ENSMUSP00000016771,10090.ENSMUSP00000017629,10090.ENSMUSP00000018569…	Gnai3,Rnd2,Tubb6,Tubb5,Rhoc,Pex6,Rnd1,Gars,Abcb4,Msh6,Rhoa,Rala,Dynll1,Myh9,Top2b,Dhx40,G3bp1,Atp2b1,Nudt4,Drg1,Dynll2,Gna13,Abca8b,Dnajc27,Kif3c,Rab10,Ddx5,Rab37,Srp54a,Rab15,Wrnip1,Psmc6,Rhobtb2,Atp5o,Abcg1,Rhoq,Nudt3,Tap2,Dcp2,Gnal,Gna14,Ighmbp2,Smarca2,Myl6b,Dctn2,Abcb6,Mcm6,Rab29,Kif5c,Yme1l1,Entpd2,Kif3b,Nras,Rit1,Nudt17,Abca1,Vcp,Rheb,Nudt9,Rab35,Rasl11a,Abcg2,Ruvbl1,Tuba8,Ddx47,Atf7ip,Rab…	3.89e-05	0.0024	Hydrolase activity, acting on acid anhydrides, in phosphorus-containing anhydrides	22.2222
Process	GO:0043410	125	531	10090	10090.ENSMUSP00000000058,10090.ENSMUSP00000000122,10090.ENSMUSP00000000186,10090.ENSMUSP00000000193,10090.ENSMUSP00000000305,10090.ENSMUSP00000002487,10090.ENSMUSP00000005066,10090.ENSMUSP00000005218,10090.ENSMUSP00000007130,10090.ENSMUSP00000007757,10090.ENSMUSP00000017590,10090.ENSMUSP00000017610,10090.ENSMUSP00000017799,10090.ENSMUSP00000018993,10090.ENSMUSP00000019231,10090.ENSMUSP00000019723…	Cav2,Ngfr,Fgf23,Ccl2,Tpd52l1,Braf,Map2k1,Cd44,Ctnnb1,Tgfbr1,C1qtnf1,Timp2,Cd40,Wwc1,Atp6ap1,D17Wsu104e,Ctgf,Egfr,Igfbp3,Map2k6,Dnajc27,Ccl7,Pik3r5,Gadd45g,Hmgcr,F2rl1,Fgf9,Spry2,Angpt1,Robo1,Sod1,Xdh,Eif2ak2,Map4k2,Maged1,Tnfrsf11a,Ptpn1,Dok5,Lamtor2,Glipr2,Map3k6,Nmnat1,Tgfa,Ret,Ltbr,Rps3,Pak1,Ilk,Sh3rf1,Cx3cl1,Myd88,Dstyk,Grm1,Jcad,Fzd8,Map2k4,Arl6ip5,Map3k9,Sema7a,Cd81,Lrp1,Gadd45a,Mfhas1,Thbs…	3.93e-05	0.0014	Positive regulation of mapk cascade	23.5405
Process	GO:0032409	74	273	10090	10090.ENSMUSP00000000193,10090.ENSMUSP00000001115,10090.ENSMUSP00000003442,10090.ENSMUSP00000004137,10090.ENSMUSP00000007236,10090.ENSMUSP00000017881,10090.ENSMUSP00000019290,10090.ENSMUSP00000021077,10090.ENSMUSP00000021750,10090.ENSMUSP00000023509,10090.ENSMUSP00000024811,10090.ENSMUSP00000024860,10090.ENSMUSP00000025805,10090.ENSMUSP00000025842,10090.ENSMUSP00000026357,10090.ENSMUSP00000028241…	Ccl2,Grk6,Cacnb3,Gstm7,Syngr3,Mmp9,Cacng2,Slc9a3r1,Ryr2,Klhl24,Pim1,Ehd3,Cnih2,Gal,Jph3,Stom,Pink1,Slc9a1,Cdk5,Tesc,Stoml1,Rasgrf1,Atp1b3,Stac,Fam115a,Sln,Oxsr1,Kctd7,Akap9,Kcna1,Sepn1,Crh,Scn4b,Nlgn3,Ywhae,Shisa6,Drd2,Homer1,Rph3a,Htt,Hspa2,Cacng3,Gbas,Itgb1,Insr,Sumo1,Ank3,Cacng7,Fgf14,Scn1b,Rasgrf2,Fgf12,Actb,Wnk4,Plcg1,Hap1,Stk39,Ephb2,Gm2036,Amigo1,Shank1,Gem,Kcng1,Calm1,Hecw1,Bcl2,Grin2a,Cf…	3.99e-05	0.0014	Regulation of transporter activity	27.1062
Process	GO:0019216	95	377	10090	10090.ENSMUSP00000000579,10090.ENSMUSP00000001780,10090.ENSMUSP00000002320,10090.ENSMUSP00000003681,10090.ENSMUSP00000005073,10090.ENSMUSP00000005651,10090.ENSMUSP00000007207,10090.ENSMUSP00000011029,10090.ENSMUSP00000018644,10090.ENSMUSP00000020323,10090.ENSMUSP00000020755,10090.ENSMUSP00000020846,10090.ENSMUSP00000021283,10090.ENSMUSP00000022590,10090.ENSMUSP00000022701,10090.ENSMUSP00000023119…	Sox9,Akt1,Ppard,Sec14l2,Zp3,Por,Clcn2,Dnajc19,Adora2b,Avpr1a,Smek2,Srebf1,Pik3r5,Dnajc15,Rb1,Vdr,Sod1,Dhh,Abcg1,Stard4,Cpt1a,Gal,Rdh10,Acadl,Ccdc3,Fabp5,Eif6,Cyr61,Nr4a3,Stoml2,Prkaa2,Prkag2,Dgat2,Dkk3,Acsl4,Star,Hpgd,Rbl2,Ldlr,Crebl2,Vav3,Pdk3,Scd1,Tspo,Ptchd2,Irs2,Socs5,Atp1a1,Pdk2,Trib3,Thrsp,Cd81,Fgf1,Acsl5,Htr2a,Zmpste24,Cdc42,Pik3r1,Sorl1,Socs3,Mtmr9,Insig1,Vav2,Pik3cg,Tbl1xr1,Capn2,Abcd2,N…	3.99e-05	0.0014	Regulation of lipid metabolic process	25.1989
Process	GO:0043393	65	230	10090	10090.ENSMUSP00000000939,10090.ENSMUSP00000001780,10090.ENSMUSP00000001963,10090.ENSMUSP00000007757,10090.ENSMUSP00000016400,10090.ENSMUSP00000017881,10090.ENSMUSP00000020640,10090.ENSMUSP00000022212,10090.ENSMUSP00000022921,10090.ENSMUSP00000023006,10090.ENSMUSP00000023882,10090.ENSMUSP00000025075,10090.ENSMUSP00000025786,10090.ENSMUSP00000028981,10090.ENSMUSP00000029611,10090.ENSMUSP00000030636…	Hip1r,Akt1,Ace,Tgfbr1,Ctsz,Mmp9,Gnb2l1,Plk2,Angpt1,Lrrc6,Sympk,Bambi,Pacs1,Mapre1,Lef1,Stmn1,Cdk5,Lrpap1,Add2,Camk1,Pim2,Pin1,Anxa2,Hnrnpk,Ptprf,Spon1,Trib3,Bag2,Lrp1,Ttbk1,Plcl2,Grem2,Mapk3,Amfr,Cdc42,Sorl1,Nog,Ep300,Cthrc1,Ldoc1,Map2,Dab2,Hopx,Mark3,Adnp,Rgma,Ramp1,Actb,Pex14,Itga4,Ifit2,Ppara,Arhgef7,Caprin2,Crmp1,Ephb6,Met,Disc1,Rapgef2,Csnk1e,Ide,Snapin,Ccpg1,Actr3,Dnajb2	4.08e-05	0.0014	Regulation of protein binding	28.2609
Process	GO:0021537	77	288	10090	10090.ENSMUSP00000002708,10090.ENSMUSP00000003320,10090.ENSMUSP00000004326,10090.ENSMUSP00000007130,10090.ENSMUSP00000007959,10090.ENSMUSP00000018880,10090.ENSMUSP00000019911,10090.ENSMUSP00000020243,10090.ENSMUSP00000020323,10090.ENSMUSP00000020329,10090.ENSMUSP00000020692,10090.ENSMUSP00000021530,10090.ENSMUSP00000022040,10090.ENSMUSP00000022629,10090.ENSMUSP00000022639,10090.ENSMUSP00000023600…	Shh,Eif2b5,Plxna3,Ctnnb1,Rhoa,Ndel1,Hdac2,Ascl1,Avpr1a,Egfr,Btg2,Hif1a,Agtpbp1,Dpysl2,Nefl,Robo1,Pfdn1,Slit1,Hprt,Xrn2,Slc7a11,Lef1,Nr4a3,Slc2a1,Sema3a,Cdk5,Npy,Lrp6,Fgf13,Cul5,Htr5a,Hnrnpk,Sema7a,Dicer1,Dpcd,Pou3f3,Uqcrq,Kcna1,Fat4,Cep120,Bmerb1,Ptprs,Dnah5,Ywhae,Nf1,Btbd3,Drd2,Numbl,Htt,Rac1,Tacc1,Cntn2,Alk,Usp9x,Bcan,Nr2f1,Casp3,Kdm6b,Csnk2a1,Rtn4,Ephb2,Bnip3,Dab1,Nf2,Tnr,Tsc1,Plxna4,Cfl1,Disc…	4.15e-05	0.0014	Telencephalon development	26.7361
Function	GO:0015318	163	734	10090	10090.ENSMUSP00000000090,10090.ENSMUSP00000000199,10090.ENSMUSP00000000201,10090.ENSMUSP00000000572,10090.ENSMUSP00000000984,10090.ENSMUSP00000001126,10090.ENSMUSP00000002848,10090.ENSMUSP00000003442,10090.ENSMUSP00000003622,10090.ENSMUSP00000004396,10090.ENSMUSP00000005952,10090.ENSMUSP00000007207,10090.ENSMUSP00000007257,10090.ENSMUSP00000009522,10090.ENSMUSP00000009875,10090.ENSMUSP00000014750…	Cox5a,Ncs1,Nalcn,Gabra2,Slc7a7,Slc46a1,Grin2d,Cacnb3,Slc25a1,Atp6v1f,Slc30a4,Clcn2,Clic1,Slc16a12,Kcnd1,Slc25a11,Slc12a7,Kcnab3,Trpv2,Cacng2,Atp6v1e1,Atp2b1,Mcu,Slc9a3r1,Slc6a4,Atp6v1d,Slc25a29,Ryr2,Sfxn1,Vdac2,Cacna2d3,Ank,P2rx6,Tfrc,Atp5o,Asic1,Slc4a8,Abcg1,Slc15a3,Slc1a1,Kcnk4,Gria4,Slc16a14,Tmem206,Snap25,Slc23a2,Anxa5,Slc7a11,Glrb,Slc9a1,Grik3,Cdk5,Gabrd,Gabrg1,Abcg2,Sec61a1,Slc6a6,Slc17a6,S…	4.22e-05	0.0025	Inorganic molecular entity transmembrane transporter activity	22.2071
Process	GO:0044282	83	318	10090	10090.ENSMUSP00000000186,10090.ENSMUSP00000002320,10090.ENSMUSP00000003720,10090.ENSMUSP00000005218,10090.ENSMUSP00000007005,10090.ENSMUSP00000007255,10090.ENSMUSP00000015950,10090.ENSMUSP00000020034,10090.ENSMUSP00000020182,10090.ENSMUSP00000020241,10090.ENSMUSP00000020522,10090.ENSMUSP00000021197,10090.ENSMUSP00000021550,10090.ENSMUSP00000021684,10090.ENSMUSP00000022148,10090.ENSMUSP00000022322…	Fgf23,Ppard,Crot,Cd44,Acat2,Ddah2,Qdpr,Echdc1,Pex7,Pah,Pfkl,Blmh,Arg2,Cyp46a1,Mccc2,Glud1,Esd,Slc25a17,Glo1,Eci1,Nudt3,Aldh1a7,Cpt1a,Cyp26a1,Hprt,Acadl,Cyp27a1,Bpnt1,Crat,Hao1,Ivd,Uox,Ddah1,Decr1,Cpt2,Akr1a1,Cda,Gnpda2,Aldh2,Acads,Bcat1,Fah,Gpt2,Acat1,Mpi,Etfa,Hsd3b7,Acaa2,Pck2,Akr1b8,Aldh5a1,Faah,Mtmr7,Inpp5j,Gls2,Cbr3,Cyp24a1,Gpi1,Asrgl1,Sh3bp1,Aldh3b1,Dlst,Ahcy,Cemip,Acox1,Abat,Impa1,Abcd2,Lpi…	4.34e-05	0.0015	Small molecule catabolic process	26.1006
COMPARTMENTS	GOCC:0044306	57	193	10090	10090.ENSMUSP00000000193,10090.ENSMUSP00000000199,10090.ENSMUSP00000003754,10090.ENSMUSP00000006467,10090.ENSMUSP00000020040,10090.ENSMUSP00000020420,10090.ENSMUSP00000023776,10090.ENSMUSP00000025110,10090.ENSMUSP00000025875,10090.ENSMUSP00000027020,10090.ENSMUSP00000029266,10090.ENSMUSP00000029603,10090.ENSMUSP00000029876,10090.ENSMUSP00000030676,10090.ENSMUSP00000031131,10090.ENSMUSP00000031843…	Ccl2,Ncs1,Calb2,Arpc2,Nts,Ap3d1,Slc4a8,Syt4,Slc1a1,Gria4,Anxa5,Prss12,Calb1,Grik3,Uchl1,Npy,Ilk,Ptpn9,Bsn,Tanc1,Cplx1,Hnrnpk,Kcna2,Sncb,Pacsin1,Bzrap1,Surf6,Oprd1,Flrt3,Kcna1,Kcnb1,Adra2c,Grin2b,Pgr,Ptprn2,Adcyap1,Prkcb,Actg1,Drd2,Gria3,Glul,Erc2,Gad1,Snap91,Prkcg,Actb,Hap1,L1cam,Elavl4,Kcnc3,Flrt1,Grik4,Grin2a,Grm4,Prrt2,Htr1b,Chrm3	4.35e-05	0.0011	Neuron projection terminus	29.5337
RCTM	MMU-191273	16	25	10090	10090.ENSMUSP00000001507,10090.ENSMUSP00000005003,10090.ENSMUSP00000006692,10090.ENSMUSP00000007005,10090.ENSMUSP00000022176,10090.ENSMUSP00000022977,10090.ENSMUSP00000025713,10090.ENSMUSP00000033509,10090.ENSMUSP00000033715,10090.ENSMUSP00000034015,10090.ENSMUSP00000038063,10090.ENSMUSP00000046856,10090.ENSMUSP00000047776,10090.ENSMUSP00000057354,10090.ENSMUSP00000126603,10090.ENSMUSP00000136944	Cyp51,Lbr,Mvd,Acat2,Hmgcr,Sqle,Tm7sf2,Ebp,Nsdhl,Msmo1,Dhcr24,Lss,Ppapdc2,Sc5d,Ggps1,Hmgcs1	4.36e-05	0.0032	Cholesterol biosynthesis	64
COMPARTMENTS	GOCC:0005938	68	245	10090	10090.ENSMUSP00000000590,10090.ENSMUSP00000000939,10090.ENSMUSP00000002029,10090.ENSMUSP00000003575,10090.ENSMUSP00000003754,10090.ENSMUSP00000005066,10090.ENSMUSP00000007130,10090.ENSMUSP00000007959,10090.ENSMUSP00000010298,10090.ENSMUSP00000016400,10090.ENSMUSP00000016771,10090.ENSMUSP00000018437,10090.ENSMUSP00000019577,10090.ENSMUSP00000020171,10090.ENSMUSP00000022369,10090.ENSMUSP00000023087…	Rdx,Hip1r,Emd,Tpm4,Calb2,Map2k1,Ctnnb1,Rhoa,Spire2,Ctsz,Myh9,Pfn1,Gipc1,Ctgf,Vcl,Twf1,Mkln1,Gsn,Mapre1,Gucy1b3,Calb1,Slc2a1,Wasl,Wee1,Mpp1,Anxa2,Bsn,Cib2,Hnrnpk,Exoc3,Plekhh2,Actr1a,Eef1a1,Myrip,Mtss1l,Pard6b,Eps8,Cdc42se1,Arf6,Cbfb,Prkcb,Myo5b,Gnai1,Hmcn1,Eno1,Numa1,Crip2,Erc2,Cltb,Marcks,Gad1,Actb,Cttn,Dstn,Osbpl8,Tmod1,Nf2,Myo10,Arhgef7,Dctn1,Maea,Cfl1,Ank1,Macf1,Exoc5,Inpp5d,Myadm,Arhgap32	4.39e-05	0.0011	Cell cortex	27.7551
TISSUES	BTO:0000988	147	649	10090	10090.ENSMUSP00000001548,10090.ENSMUSP00000002303,10090.ENSMUSP00000002572,10090.ENSMUSP00000003720,10090.ENSMUSP00000003964,10090.ENSMUSP00000004381,10090.ENSMUSP00000005952,10090.ENSMUSP00000006557,10090.ENSMUSP00000009157,10090.ENSMUSP00000015171,10090.ENSMUSP00000015841,10090.ENSMUSP00000017851,10090.ENSMUSP00000018466,10090.ENSMUSP00000018711,10090.ENSMUSP00000018993,10090.ENSMUSP00000020241…	Itga3,Rhoc,Slc9a3r2,Crot,Gys1,Lpcat3,Slc30a4,Elovl1,Dynll1,Galns,Setdb1,Serinc3,Tomm34,Gabarap,Wwc1,Pah,Tspan13,Sdc1,Abca8b,Gosr2,Tmx1,Arg2,Chga,Dhfr,Ero1l,Bcl2l2,Fam134b,Alcam,Nudt3,Ring1,Riok3,Osbp,Rfk,Aldh1a7,Fas,Cpt1a,Smarca2,Pnliprp2,Maged1,Parp1,Entpd2,Dnajc10,Chgb,Eif4e,Sdcbp,B4galt1,Prkaa2,Leprot,Cda,Wasl,Sec61a1,Cd9,Vkorc1,Nucb1,Abcc8,Morf4l2,Tmem66,Ufsp2,N4bp1,Rbl2,Man2b1,Gpt2,Myd88,Cam…	4.44e-05	0.0027	Pancreas	22.6502
KEGG	mmu04068	43	130	10090	10090.ENSMUSP00000001780,10090.ENSMUSP00000002487,10090.ENSMUSP00000004990,10090.ENSMUSP00000005066,10090.ENSMUSP00000007757,10090.ENSMUSP00000018711,10090.ENSMUSP00000020329,10090.ENSMUSP00000021090,10090.ENSMUSP00000021903,10090.ENSMUSP00000022212,10090.ENSMUSP00000023151,10090.ENSMUSP00000025393,10090.ENSMUSP00000028610,10090.ENSMUSP00000029445,10090.ENSMUSP00000030243,10090.ENSMUSP00000030784…	Akt1,Braf,Mapk14,Map2k1,Tgfbr1,Gabarap,Egfr,Grb2,Gadd45g,Plk2,Bcl6,Smad4,Cat,Nras,Prkaa2,Prkag2,Gabarapl1,Rbl2,Prkab2,Grm1,Atg12,Irs2,Pck2,Fbxo25,Setd7,Gadd45a,Mapk3,Pik3r1,Ep300,Sos1,G6pc3,Homer1,Cdkn2d,Mapk11,Insr,Foxo6,Bnip3,Akt3,Mapk10,Csnk1e,Sgk1,Nlk,Stat3	4.46e-05	0.0011	FoxO signaling pathway	33.0769
Function	GO:0016462	163	735	10090	10090.ENSMUSP00000000001,10090.ENSMUSP00000001347,10090.ENSMUSP00000001513,10090.ENSMUSP00000001566,10090.ENSMUSP00000002303,10090.ENSMUSP00000002840,10090.ENSMUSP00000003451,10090.ENSMUSP00000003572,10090.ENSMUSP00000003717,10090.ENSMUSP00000005503,10090.ENSMUSP00000007959,10090.ENSMUSP00000009003,10090.ENSMUSP00000009157,10090.ENSMUSP00000016771,10090.ENSMUSP00000017629,10090.ENSMUSP00000018569…	Gnai3,Rnd2,Tubb6,Tubb5,Rhoc,Pex6,Rnd1,Gars,Abcb4,Msh6,Rhoa,Rala,Dynll1,Myh9,Top2b,Dhx40,G3bp1,Atp2b1,Nudt4,Drg1,Dynll2,Gna13,Abca8b,Dnajc27,Kif3c,Rab10,Ddx5,Rab37,Srp54a,Rab15,Wrnip1,Psmc6,Rhobtb2,Atp5o,Abcg1,Rhoq,Nudt3,Tap2,Dcp2,Gnal,Gna14,Ighmbp2,Smarca2,Myl6b,Dctn2,Abcb6,Mcm6,Rab29,Kif5c,Yme1l1,Entpd2,Kif3b,Nras,Rit1,Nudt17,Abca1,Vcp,Rheb,Nudt9,Rab35,Rasl11a,Abcg2,Ruvbl1,Tuba8,Ddx47,Atf7ip,Rab…	4.48e-05	0.0026	Pyrophosphatase activity	22.1769
Process	GO:0051338	202	948	10090	10090.ENSMUSP00000000305,10090.ENSMUSP00000001780,10090.ENSMUSP00000001825,10090.ENSMUSP00000001963,10090.ENSMUSP00000002487,10090.ENSMUSP00000004646,10090.ENSMUSP00000005066,10090.ENSMUSP00000005077,10090.ENSMUSP00000007130,10090.ENSMUSP00000007757,10090.ENSMUSP00000007959,10090.ENSMUSP00000008036,10090.ENSMUSP00000008878,10090.ENSMUSP00000009143,10090.ENSMUSP00000014743,10090.ENSMUSP00000015137…	Tpd52l1,Akt1,Chordc1,Ace,Braf,Coro1c,Map2k1,Hspb1,Ctnnb1,Tgfbr1,Rhoa,Rplp1,Gprc5b,Bmp7,Csf1,Limk1,Cd40,Sfrp5,Dusp6,Egfr,Ccng1,Gnb2l1,Trib2,Map2k6,Slc9a3r1,Pik3r5,Ppp2r3c,Gadd45g,Hmgcr,Lats2,Rgcc,Clu,Rb1,Spry2,Angpt1,Adcy8,Pak2,Robo1,Sod1,Pim1,Eif2ak2,Impact,Spry4,Prrc1,Map4k2,Prdx3,Maged1,Nab2,Smad7,Ppm1f,Tnfrsf11a,Mastl,Spred1,Ptpn1,Zgpat,Lamtor2,Bcl10,Cyr61,Map3k6,Prkag2,Cdk5,Uchl1,Tesc,Tgfa,Re…	4.55e-05	0.0015	Regulation of transferase activity	21.308
Function	GO:0016301	159	714	10090	10090.ENSMUSP00000000542,10090.ENSMUSP00000000642,10090.ENSMUSP00000001115,10090.ENSMUSP00000001780,10090.ENSMUSP00000002087,10090.ENSMUSP00000002487,10090.ENSMUSP00000003313,10090.ENSMUSP00000003850,10090.ENSMUSP00000004281,10090.ENSMUSP00000004920,10090.ENSMUSP00000004990,10090.ENSMUSP00000005066,10090.ENSMUSP00000006912,10090.ENSMUSP00000007757,10090.ENSMUSP00000013970,10090.ENSMUSP00000015137…	Acvrl1,Hk2,Grk6,Akt1,Pnck,Braf,Grk5,Itpkc,Dyrk2,Ulk2,Mapk14,Map2k1,Pip4k2a,Tgfbr1,Pip4k2c,Limk1,Camk1g,Mapkapk2,Pip4k2b,Pank3,Nrbp2,Nuak1,Egfr,Pfkl,Map2k6,Cmpk2,Nme2,Plk2,Lats2,Twf1,Pak2,Rps6ka2,Pkmyt1,Pim1,Eif2ak2,Riok3,Rfk,Rps6kb2,Map4k2,Fn3k,Stk17b,Uck2,Uhmk1,Mastl,Acvr1c,Hipk1,Cpne3,Ikbkap,Npr2,Prkaa2,Cmpk1,Pink1,Map3k6,Prkag2,Cdk5,Ret,Camk1,Pak1,Ilk,Wee1,Pim2,Dstyk,Prkab2,Pdk3,Gak,Camk1d,Bmp…	4.64e-05	0.0026	Kinase activity	22.2689
Process	GO:0051345	153	682	10090	10090.ENSMUSP00000000058,10090.ENSMUSP00000000122,10090.ENSMUSP00000000193,10090.ENSMUSP00000000939,10090.ENSMUSP00000001780,10090.ENSMUSP00000002303,10090.ENSMUSP00000004646,10090.ENSMUSP00000004990,10090.ENSMUSP00000005066,10090.ENSMUSP00000005503,10090.ENSMUSP00000006181,10090.ENSMUSP00000006618,10090.ENSMUSP00000007959,10090.ENSMUSP00000009157,10090.ENSMUSP00000011029,10090.ENSMUSP00000016138…	Cav2,Ngfr,Ccl2,Hip1r,Akt1,Rhoc,Coro1c,Mapk14,Map2k1,Msh6,Napa,Arhgef19,Rhoa,Dynll1,Dnajc19,Fnta,Cd40,Pfn1,Ndel1,Gipc1,Ctgf,Tbc1d15,Gnb2l1,Dynll2,Gna13,Ccl7,Adap2,F2rl1,Dnajc15,Robo1,Arhgap28,Xdh,Arhgdig,Pmaip1,Fas,Arhgap19,Ric8,Chm,Casp1,Smap1,Ppm1f,Rsu1,Acvr1c,Gsn,Dnajc10,Itga6,Efna3,Bcl10,Cyr61,Vcp,Pink1,Casp9,Ret,Rab6a,Rps3,Dock11,Cx3cl1,Pin1,Rasgrf1,Ctsh,Atp1b3,Smap2,S100a10,Foxj1,Arhgap27,Ac…	4.7e-05	0.0016	Positive regulation of hydrolase activity	22.434
Process	GO:0009612	63	222	10090	10090.ENSMUSP00000000193,10090.ENSMUSP00000000579,10090.ENSMUSP00000001592,10090.ENSMUSP00000001780,10090.ENSMUSP00000003442,10090.ENSMUSP00000004990,10090.ENSMUSP00000007130,10090.ENSMUSP00000007959,10090.ENSMUSP00000015481,10090.ENSMUSP00000017799,10090.ENSMUSP00000019931,10090.ENSMUSP00000020329,10090.ENSMUSP00000020692,10090.ENSMUSP00000021674,10090.ENSMUSP00000021750,10090.ENSMUSP00000021929…	Ccl2,Sox9,Jup,Akt1,Cacnb3,Mapk14,Ctnnb1,Rhoa,Endog,Cd40,Lrp11,Egfr,Btg2,Fos,Ryr2,Habp4,Ankrd1,Rela,Kcnk4,Ankrd2,Strbp,Bcl10,Slc2a1,Slc9a1,Mtpn,Xpc,Ltbr,Tnfrsf1a,Gclc,Kcnj2,Atp1a1,Piezo2,Map2k4,Scx,Gadd45a,Thbs1,Tmem120a,Htr2a,Gpi1,Mapk3,Abhd12,Itga2,Kcna1,Grin2b,Arhgdia,Junb,Drd2,Scn1a,Slitrk6,Htt,Atp8a2,Rac1,Mmp14,Jund,Etv1,Ano3,Ptn,Dcn,Bnip3,Jun,Cntnap2,Slc12a2,Bmp6	4.8e-05	0.0016	Response to mechanical stimulus	28.3784
Process	GO:0032787	111	461	10090	10090.ENSMUSP00000000287,10090.ENSMUSP00000000642,10090.ENSMUSP00000002320,10090.ENSMUSP00000003655,10090.ENSMUSP00000003720,10090.ENSMUSP00000004137,10090.ENSMUSP00000004990,10090.ENSMUSP00000005651,10090.ENSMUSP00000006557,10090.ENSMUSP00000007005,10090.ENSMUSP00000010807,10090.ENSMUSP00000011896,10090.ENSMUSP00000020034,10090.ENSMUSP00000020182,10090.ENSMUSP00000020522,10090.ENSMUSP00000021268…	Scpep1,Hk2,Ppard,As3mt,Crot,Gstm7,Mapk14,Por,Elovl1,Acat2,Fads1,Pgam1,Echdc1,Pex7,Pfkl,Aloxe3,Hif1a,Pdhb,Slc25a17,Glo1,Cyp1b1,Eci1,Me2,Fads2,Cpt1a,Cyp26a1,Scd3,Scd2,Rdh10,Acadl,Cyp27a1,Crat,Hsd17b12,Hao1,Ivd,Acss2,Decr1,Nr4a3,Prkaa2,Cyp2j6,Pdpn,Cpt2,Akr1a1,Prkag2,Aacs,Acads,Ldhb,Tnfrsf1a,Fah,Acsl4,Star,Hpgd,Acsl1,Pla2g15,Acat1,Mpi,Etfa,Me1,Prkab2,Scd1,Acaa2,Pck2,Prkar2b,Aldh5a1,Faah,Glyat,Dsel,Da…	4.8e-05	0.0016	Monocarboxylic acid metabolic process	24.0781
RCTM	MMU-168249	202	949	10090	10090.ENSMUSP00000000299,10090.ENSMUSP00000001479,10090.ENSMUSP00000001566,10090.ENSMUSP00000001592,10090.ENSMUSP00000001950,10090.ENSMUSP00000002284,10090.ENSMUSP00000003038,10090.ENSMUSP00000003117,10090.ENSMUSP00000003550,10090.ENSMUSP00000004396,10090.ENSMUSP00000004715,10090.ENSMUSP00000004990,10090.ENSMUSP00000005218,10090.ENSMUSP00000006235,10090.ENSMUSP00000006467,10090.ENSMUSP00000006764…	Itgb2,Kpnb1,Tubb5,Jup,Tollip,Plaur,Ap2a2,Ap1m1,Ncstn,Atp6v1f,Mospd2,Mapk14,Cd44,Ctsb,Arpc2,Aprt,Ctnnb1,Rhoa,Dynll1,Syngr1,Pgam1,Zfyve20,Psmb1,Surf4,Limk1,Galns,Wasf3,Ctsz,Mapkapk2,Myh9,Serpinb6a,Psmd11,Timp2,Mmp9,Ghdc,Atp6v1e1,Hebp2,Ube2d1,Dusp6,Pfkl,Mmtag2,Map2k6,Rab10,Rab37,Grb2,Nme2,Atp6v1d,Chga,Npc2,Fos,Cd180,Hexb,Scamp1,Vcl,Psmc6,Clu,Pak2,Rps6ka2,Vapa,Peli3,Rela,Huwe1,Prdx4,Irf7,Cct8,Casp1,C…	4.8e-05	0.0034	Innate Immune System	21.2856
KEGG	mmu04540	32	84	10090	10090.ENSMUSP00000000001,10090.ENSMUSP00000001513,10090.ENSMUSP00000001566,10090.ENSMUSP00000005066,10090.ENSMUSP00000020329,10090.ENSMUSP00000020706,10090.ENSMUSP00000021090,10090.ENSMUSP00000022013,10090.ENSMUSP00000023007,10090.ENSMUSP00000029445,10090.ENSMUSP00000029635,10090.ENSMUSP00000032233,10090.ENSMUSP00000037255,10090.ENSMUSP00000047774,10090.ENSMUSP00000051033,10090.ENSMUSP00000051619…	Gnai3,Tubb6,Tubb5,Map2k1,Egfr,Adcy1,Grb2,Adcy2,Adcy8,Nras,Gucy1b3,Tuba8,Grm1,Htr2a,Tuba1c,Mapk3,Gnai2,Tubb2a,Sos1,Prkcb,Tubb3,Gnai1,Drd2,Tubb2b,Tuba1b,Gjd2,Map3k2,Tuba1a,Prkcg,Plcb4,Gucy1a2,Pdgfd	4.84e-05	0.0011	Gap junction	38.0952
Component	GO:0055038	29	72	10090	10090.ENSMUSP00000005256,10090.ENSMUSP00000017783,10090.ENSMUSP00000021001,10090.ENSMUSP00000022197,10090.ENSMUSP00000023486,10090.ENSMUSP00000024860,10090.ENSMUSP00000025684,10090.ENSMUSP00000025875,10090.ENSMUSP00000028755,10090.ENSMUSP00000030698,10090.ENSMUSP00000031009,10090.ENSMUSP00000034713,10090.ENSMUSP00000035007,10090.ENSMUSP00000035898,10090.ENSMUSP00000041727,10090.ENSMUSP00000042053…	Ndrg1,Rab11fip4,Rab10,Scamp1,Tfrc,Ehd3,Ehd1,Slc1a1,Ehd4,Stx12,Nsg1,Ldlr,Cmtm6,Scamp5,Zdhhc2,Micall1,Arf6,Abhd17b,Vti1b,Rab11fip5,Sorl1,Slc9a7,Rac1,Insr,Ehd2,Fzd7,Abhd17c,Rab11fip3,Rab4a	4.86e-05	0.00069	Recycling endosome membrane	40.2778
Process	GO:0051881	31	80	10090	10090.ENSMUSP00000000122,10090.ENSMUSP00000001780,10090.ENSMUSP00000007257,10090.ENSMUSP00000020000,10090.ENSMUSP00000020640,10090.ENSMUSP00000021410,10090.ENSMUSP00000023707,10090.ENSMUSP00000025399,10090.ENSMUSP00000025961,10090.ENSMUSP00000027015,10090.ENSMUSP00000027777,10090.ENSMUSP00000029769,10090.ENSMUSP00000030164,10090.ENSMUSP00000030169,10090.ENSMUSP00000030536,10090.ENSMUSP00000032882…	Ngfr,Akt1,Clic1,Hebp2,Gnb2l1,Ppp2r3c,Sod1,Pmaip1,Prdx3,Casp1,Parp1,Gclm,Vcp,Stoml2,Pink1,Ndufc2,Gclc,Tspo,Rnf122,Arl6ip5,Oprd1,Pip5kl1,Fzd9,Atpif1,Mllt11,Slc25a36,Prkce,Dcn,Slc25a33,Bnip3,Bcl2	4.88e-05	0.0016	Regulation of mitochondrial membrane potential	38.75
COMPARTMENTS	GOCC:0005911	101	410	10090	10090.ENSMUSP00000000122,10090.ENSMUSP00000000590,10090.ENSMUSP00000001592,10090.ENSMUSP00000001780,10090.ENSMUSP00000003451,10090.ENSMUSP00000003717,10090.ENSMUSP00000003754,10090.ENSMUSP00000003971,10090.ENSMUSP00000005234,10090.ENSMUSP00000005256,10090.ENSMUSP00000007130,10090.ENSMUSP00000007757,10090.ENSMUSP00000007959,10090.ENSMUSP00000016771,10090.ENSMUSP00000021090,10090.ENSMUSP00000022369…	Ngfr,Rdx,Jup,Akt1,Rnd1,Abcb4,Calb2,Lin7b,Wdr1,Ndrg1,Ctnnb1,Tgfbr1,Rhoa,Myh9,Grb2,Vcl,Pvrl3,Klhl24,Cxadr,Limd1,Podxl,Fam129b,Itga6,Jag1,Anxa5,B4galt1,Tln1,Slc2a1,Slc9a1,Fscn1,Ybx3,Pak1,Ilk,Fgf13,Cdh5,Pvrl1,Clmp,Kcnj2,Jcad,Ppp1ca,Kirrel2,Atp1a1,Micall2,Kcna2,Polr2l,Sgsm3,Lama1,Mlc1,Sh3bp1,Frmd6,Pard6b,Eps8,Flrt3,Nov,Cdc42,Pik3r1,Flrt2,Scn4b,Rap1b,Actg1,Tmem65,Flot2,Sirt2,Nrap,Efna5,Scn1a,Cd99l2,Mts…	4.93e-05	0.0012	Cell-cell junction	24.6341
Component	GO:0098791	85	330	10090	10090.ENSMUSP00000000895,10090.ENSMUSP00000002063,10090.ENSMUSP00000003117,10090.ENSMUSP00000004968,10090.ENSMUSP00000009219,10090.ENSMUSP00000009234,10090.ENSMUSP00000020350,10090.ENSMUSP00000020420,10090.ENSMUSP00000020537,10090.ENSMUSP00000021001,10090.ENSMUSP00000021201,10090.ENSMUSP00000021285,10090.ENSMUSP00000021380,10090.ENSMUSP00000022197,10090.ENSMUSP00000023064,10090.ENSMUSP00000025590…	Necab3,Ap4e1,Ap1m1,Plod3,Cabp7,Ap1b1,Lgr5,Ap3d1,Nsg2,Rab10,Cpd,Stx8,Trappc6b,Scamp1,Cby1,Osbp,Rab29,Stx6,Snap25,B4galt1,Adc,Nsg1,Ccdc91,Rab30,Xylt1,Rab6a,Stx4a,Nucb1,St3gal2,Chst5,Galnt2,St3gal4,Bsn,Clvs1,Scamp5,Fam91a1,BC022687,Hace1,Chst2,Nmnat2,March9,Psenen,Bet1,Akap9,Cnst,Coro7,Golim4,Lamp2,Gcc2,Fut8,Pam,Golph3,Sorl1,Tmed3,Vps53,Gal3st3,Adam10,Rab7b,B4galt6,Pld4,Rab31,Pi4k2a,Slc9a7,Ap3s2,Atp…	5.23e-05	0.00073	Golgi apparatus subcompartment	25.7576
NetworkNeighborAL	CL:24696	18	32	10090	10090.ENSMUSP00000001507,10090.ENSMUSP00000005003,10090.ENSMUSP00000006692,10090.ENSMUSP00000021684,10090.ENSMUSP00000022176,10090.ENSMUSP00000022977,10090.ENSMUSP00000025713,10090.ENSMUSP00000027356,10090.ENSMUSP00000033509,10090.ENSMUSP00000033715,10090.ENSMUSP00000034015,10090.ENSMUSP00000038063,10090.ENSMUSP00000046856,10090.ENSMUSP00000056027,10090.ENSMUSP00000057354,10090.ENSMUSP00000126603…	Cyp51,Lbr,Mvd,Cyp46a1,Hmgcr,Sqle,Tm7sf2,Cyp27a1,Ebp,Nsdhl,Msmo1,Dhcr24,Lss,Sigmar1,Sc5d,Ggps1,Hmgcs1,Soat1	5.26e-05	0.0285	Cholesterol biosynthesis, and Primary bile acid biosynthesis	56.25
TISSUES	BTO:0000925	59	204	10090	10090.ENSMUSP00000000122,10090.ENSMUSP00000001780,10090.ENSMUSP00000002708,10090.ENSMUSP00000003754,10090.ENSMUSP00000004990,10090.ENSMUSP00000006949,10090.ENSMUSP00000007130,10090.ENSMUSP00000017576,10090.ENSMUSP00000019290,10090.ENSMUSP00000021195,10090.ENSMUSP00000021674,10090.ENSMUSP00000022331,10090.ENSMUSP00000023707,10090.ENSMUSP00000024099,10090.ENSMUSP00000025402,10090.ENSMUSP00000027906…	Ngfr,Akt1,Shh,Calb2,Mapk14,Tph2,Ctnnb1,Rbfox3,Cacng2,Slc6a4,Fos,Opn4,Sod1,Ache,Gnal,Esrrg,Stom,Snap25,Anxa5,Calb1,Pink1,Cdk5,Uchl1,Pde6b,Npy,Slc17a6,Kcnk9,Htr2a,Mapk3,Cdc42,Kcna1,Grin2b,Gabrg2,Gfap,Chat,Tubb3,Nf1,Drd2,Scn1a,Ufc1,Htt,Glul,Gjd2,Ank3,Nefh,Casp3,Gad1,Actb,Kcnk3,Gap43,Rtn4,Jun,C9orf72,Nf2,Grin2a,Ank1,Stat3,Mnx1,Htr1b	5.28e-05	0.0031	Nerve	28.9216
Component	GO:0034702	74	276	10090	10090.ENSMUSP00000000572,10090.ENSMUSP00000002848,10090.ENSMUSP00000003442,10090.ENSMUSP00000005509,10090.ENSMUSP00000007207,10090.ENSMUSP00000007257,10090.ENSMUSP00000009875,10090.ENSMUSP00000018614,10090.ENSMUSP00000019290,10090.ENSMUSP00000020312,10090.ENSMUSP00000021750,10090.ENSMUSP00000022543,10090.ENSMUSP00000022567,10090.ENSMUSP00000025805,10090.ENSMUSP00000025908,10090.ENSMUSP00000027020…	Gabra2,Grin2d,Cacnb3,Stx1a,Clcn2,Clic1,Kcnd1,Kcnab3,Cacng2,Mcu,Ryr2,Micu2,Cacna2d3,Cnih2,Kcnk4,Gria4,Tmem206,Snap25,Ccdc109b,Glrb,Grik3,Gabrd,Gabrg1,Kcnj2,Ttyh2,Clic4,Kcna2,Kcnk1,Kcnh2,Grin3b,Trpc5,Eps8,Abhd12,Unc80,Kcna1,Kcng4,Kcnb1,Kcns3,Grin2b,Scn4b,Kcnj3,Kcnq3,Gabrg2,Kcnmb4,Shisa6,Gria3,Scn1a,Porcn,Hspa2,Kcnd2,Scn8a,Cacng3,Sumo1,Cacng7,Scn1b,Hcn2,Scn9a,Cttn,Sestd1,Kcnc3,Shank1,Kcng1,Calm1,Cnt…	5.37e-05	0.00075	Ion channel complex	26.8116
COMPARTMENTS	GOCC:0031253	75	281	10090	10090.ENSMUSP00000000122,10090.ENSMUSP00000000572,10090.ENSMUSP00000000939,10090.ENSMUSP00000001126,10090.ENSMUSP00000001548,10090.ENSMUSP00000001963,10090.ENSMUSP00000005218,10090.ENSMUSP00000006467,10090.ENSMUSP00000007130,10090.ENSMUSP00000007959,10090.ENSMUSP00000018993,10090.ENSMUSP00000019044,10090.ENSMUSP00000020107,10090.ENSMUSP00000020930,10090.ENSMUSP00000020997,10090.ENSMUSP00000021077…	Ngfr,Gabra2,Hip1r,Slc46a1,Itga3,Ace,Cd44,Arpc2,Ctnnb1,Rhoa,Wwc1,Slc22a5,Atp2b1,Gna13,Sh3yl1,Slc9a3r1,Cdhr1,Robo1,Ehd3,Gabbr1,Ehd1,Podxl,Unc5a,Mapre1,Slc7a11,B4galt1,Pdpn,Rab35,Abcg2,Slc6a6,Gabarapl1,Rps3,Vezt,Jcad,Eef1a1,Pacsin1,Kcnk1,Dagla,Gpi1,Oprd1,Mtss1l,Eps8,Fzd9,Arf6,BC030336,Kcnb1,Ezr,Gabrg2,Slc39a6,Prkcb,Drd2,Map2,Slc27a4,Rac1,Insr,Cltb,Psd3,Rom1,Slc12a5,Hcn2,Car4,Eps15,Gap43,Kcnc3,Atf4,M…	5.43e-05	0.0013	Cell projection membrane	26.6904
Process	GO:0061138	57	195	10090	10090.ENSMUSP00000000579,10090.ENSMUSP00000002708,10090.ENSMUSP00000005218,10090.ENSMUSP00000007130,10090.ENSMUSP00000009143,10090.ENSMUSP00000014743,10090.ENSMUSP00000015791,10090.ENSMUSP00000016400,10090.ENSMUSP00000017868,10090.ENSMUSP00000020930,10090.ENSMUSP00000021090,10090.ENSMUSP00000022709,10090.ENSMUSP00000022921,10090.ENSMUSP00000023119,10090.ENSMUSP00000025393,10090.ENSMUSP00000027053…	Sox9,Shh,Cd44,Ctnnb1,Bmp7,Csf1,Lama5,Ctsz,Etv4,Gna13,Grb2,Spry2,Angpt1,Vdr,Smad4,Rdh10,Lef1,B4galt1,Sema3c,Sema3a,Lrp6,Pak1,Ilk,Col4a1,Sfrp1,Fem1b,Ctsh,Ppp1ca,Clic4,Dicer1,Lama1,Fgf1,Mycn,Gbx2,Greb1l,Ar,Socs3,Nog,Fat4,Pgr,Sema5a,Yap1,Sema3e,Ncoa3,Mmp14,Acvr1,Rspo3,Tgm2,Tek,Nrarp,Bcl2,Slc12a2,Met,Ahr,Slit2,Plxna1,Foxf1	5.5e-05	0.0018	Morphogenesis of a branching epithelium	29.2308
Component	GO:0030139	57	195	10090	10090.ENSMUSP00000000122,10090.ENSMUSP00000000193,10090.ENSMUSP00000003038,10090.ENSMUSP00000009003,10090.ENSMUSP00000017783,10090.ENSMUSP00000019577,10090.ENSMUSP00000019939,10090.ENSMUSP00000020323,10090.ENSMUSP00000020329,10090.ENSMUSP00000021001,10090.ENSMUSP00000021285,10090.ENSMUSP00000022416,10090.ENSMUSP00000024860,10090.ENSMUSP00000025684,10090.ENSMUSP00000027743,10090.ENSMUSP00000028062…	Ngfr,Ccl2,Ap2a2,Rala,Rab11fip4,Gipc1,Snx3,Avpr1a,Egfr,Rab10,Stx8,Anxa11,Ehd3,Ehd1,Stx6,Vim,Gsn,Ehd4,Abca1,Stx12,Scarb2,Rab35,Sec61a1,Stx4a,Vps26b,Uvrag,Inpp5f,Fmnl1,Lamp2,Cdc42,Arf6,Rab11fip1,Rab11fip5,Cdc42ep2,Cemip,Rab39,Rab7b,Nlgn3,Pld4,Rab31,Actg1,Flot2,Drd2,Stxbp1,Ftl1,Slc5a7,Snap91,Ehd2,Eps15,Stam2,Adam8,Cdc42ep4,Mpeg1,Rab11fip3,Rapgef2,Zyx,Lmbrd1	5.5e-05	0.00076	Endocytic vesicle	29.2308
Keyword	KW-0628	46	145	10090	10090.ENSMUSP00000000572,10090.ENSMUSP00000002848,10090.ENSMUSP00000003971,10090.ENSMUSP00000023334,10090.ENSMUSP00000023750,10090.ENSMUSP00000025338,10090.ENSMUSP00000025805,10090.ENSMUSP00000027020,10090.ENSMUSP00000029654,10090.ENSMUSP00000030676,10090.ENSMUSP00000030925,10090.ENSMUSP00000031119,10090.ENSMUSP00000032383,10090.ENSMUSP00000033313,10090.ENSMUSP00000034076,10090.ENSMUSP00000036962…	Gabra2,Grin2d,Lin7b,Pvrl3,Faim2,Gabbr1,Cnih2,Gria4,Glrb,Grik3,Gabrd,Gabrg1,Sspn,Atp6ap2,Cbln1,Clstn1,Pcdh8,Igsf21,Grin3b,Kctd8,Sigmar1,Abhd17b,Kcnb1,Lrrc4,Grin2b,Gabrg2,Shisa6,Gria3,Utrn,Rph3a,Kcnd2,Ank3,Gabbr2,Kcnc3,Lrfn1,Grik4,Grin2a,Abhd17c,Igsf9b,Lhfpl4,Prrt2,Lrrtm1,Chrm2,Lrrc4c,Cacng8,Chrm3	5.7e-05	0.00089	Postsynaptic cell membrane	31.7241
RCTM	MMU-9006931	55	186	10090	10090.ENSMUSP00000000001,10090.ENSMUSP00000000058,10090.ENSMUSP00000001780,10090.ENSMUSP00000002320,10090.ENSMUSP00000004786,10090.ENSMUSP00000005077,10090.ENSMUSP00000008579,10090.ENSMUSP00000015987,10090.ENSMUSP00000017881,10090.ENSMUSP00000020329,10090.ENSMUSP00000021062,10090.ENSMUSP00000021345,10090.ENSMUSP00000022268,10090.ENSMUSP00000025106,10090.ENSMUSP00000025835,10090.ENSMUSP00000025946…	Gnai3,Cav2,Akt1,Ppard,Polr2e,Hspb1,Rdh13,Rxrg,Mmp9,Egfr,Ddx5,Gtf2a1,Pdhb,Polr2d,Cpt1a,Cyp26a1,Rdh5,Rdh10,Uhmk1,Fabp5,Ppid,Nras,Abca1,Zdhhc21,Tgfa,Fkbp4,Zdhhc7,Rxrb,Pdk3,Pdk2,Gng10,Polr2l,Ptges3,Mapk3,Nrip1,Pik3r1,Gnai2,Cbfb,Pgr,Ep300,Tbl1xr1,Gnai1,Cyp26b1,Fkbp5,Ncoa3,Tbl1x,Shc1,Gng3,Gata3,Akt3,Erbb4,Dhrs3,Rdh11,Tle3,Gng2	5.7e-05	0.0038	Signaling by Nuclear Receptors	29.5699
KEGG	mmu04520	28	69	10090	10090.ENSMUSP00000007130,10090.ENSMUSP00000007757,10090.ENSMUSP00000007959,10090.ENSMUSP00000016143,10090.ENSMUSP00000020329,10090.ENSMUSP00000022369,10090.ENSMUSP00000023334,10090.ENSMUSP00000025393,10090.ENSMUSP00000029053,10090.ENSMUSP00000029611,10090.ENSMUSP00000031695,10090.ENSMUSP00000034510,10090.ENSMUSP00000039368,10090.ENSMUSP00000051619,10090.ENSMUSP00000053897,10090.ENSMUSP00000054634…	Ctnnb1,Tgfbr1,Rhoa,Wasf3,Egfr,Vcl,Pvrl3,Smad4,Ptpn1,Lef1,Wasl,Pvrl1,Ptprf,Mapk3,Erbb2,Cdc42,Ep300,Actg1,Rac1,Wasf2,Insr,Csnk2a1,Lmo7,Actb,Ssx2ip,Met,Mllt4,Nlk	5.86e-05	0.0013	Adherens junction	40.5797
[truncated: 696 more rows]

## Sheet: 2_Proprio_CrushIP_ControlIP
category	term	number_of_genes	number_of_genes_in_background	ncbiTaxonId	inputGenes	preferredNames	p_value	fdr	description	% genes
[truncated: 1,182 more rows]

## Sheet: 3_Cuta_CrushIP_ControlIP
category	term	number_of_genes	number_of_genes_in_background	ncbiTaxonId	inputGenes	preferredNames	p_value	fdr	description	% genes
[truncated: 1,116 more rows]

## Sheet: 4_Noci_CrushIP_ControlIP
category	term	number_of_genes	number_of_genes_in_background	ncbiTaxonId	inputGenes	preferredNames	p_value	fdr	description	% genes
[truncated: 1,188 more rows]
